# Supplementary material for: First X-ray Crystal Structure Characterization, Computational Studies, and Improved Synthetic Route to the Bioactive 5-Arylimino-1,3,4-thiadiazole Derivatives
Source: MDPI journal article supplement (doi:10.3390/ijms24043759), 2023-02-13
Supplement: s1 [file s1]

# Supplementary Materials for

## First X-Ray Crystal Structure Characterization Computations Studies, and Improved Synthetic Route to the Bioactive 5- Arylimino-1,3,4-Thiadiazole Derivatives

Ziad Moussa 1,\*, Alejandro Perez Paz 1, Zaher M. A. Judeh 2, Ahmed Alzamly 1, Haythem A. Saadeh 3, Basim H. Asghar 4, Sara Alsaedi 1, Bayan Masoud 1, Salama Almeqbaali 1, Saeda Estwani 1, Amna Aljaberi 1, Munirah M. Al-Rooqi 4 and Saleh A. Ahmed 4,5,\*

1 Department of Chemistry, College of Science, United Arab Emirates University,

Al Ain P.O. Box 15551, United Arab Emirates; aperez@uaeu.ac.ae (A.P.P.); ahmed.alzamly@uaeu.ac.ae (A.A.); 201809448@uaeu.ac.ae (S.A.); 201950253@uaeu.ac.ae (B.M.); 201908280@uaeu.ac.ae (S.A.); 201950248@uaeu.ac.ae (S.E.); 201705734@uaeu.ac.ae (A.A.)

2 School of Chemistry, Chemical Engineering and Biotechnology, Nanyang Technological University,

62 Nanyang Drive, N1.2–B1-14, Singapore 637459, Singapore; zaher@ntu.edu.sg

3 Department of Chemistry, School of Science, The University of Jordan, Amman 11942, Jordan;

h.saadeh@ju.edu.jo

4 Department of Chemistry, Faculty of Applied Sciences, Umm Al-Qura University,

Makkah 21955, Saudi Arabia; bhasghar@uqu.edu.sa (B.H.A.); munira900@hotmail.com (M.M.A.-R.)

5 Department of Chemistry, Faculty of Science, Assiut University, 71516 Assiut, Egypt

\* Correspondence: zmousa@uaeu.ac.ae (Z.M.); saahmed@uqu.edu.sa (S.A.A.); Tel.: +971-509695321 (Z.M.)

|                                                                                                                  |           |
|------------------------------------------------------------------------------------------------------------------|-----------|
| <b>Table of Contents</b>                                                                                         | S2        |
| 1D and 2D NMR spectra of <b>29a-m</b>                                                                            | S3-S89    |
| 1D and 2D NMR spectra of <b>31-92</b>                                                                            | S90-S458  |
| Crystal data for (Z)-N-(2,3-difluorophenyl)-2-oxopropanehydrazonoyl chloride                                     | S459-S462 |
| Crystal data for (4-ethoxyphenyl)carbamoithioyl cyanide                                                          | S463-S466 |
| Crystal data for (Z)-1-(5-((3-fluorophenyl)imino)-4-(4-iodophenyl)-4,5-dihydro-1,3,4-thiadiazol-2-yl)ethan-1-one | S467-S471 |
| Crystal data for (Z)-1-(4-phenyl-5-(p-tolylimino)-4,5-dihydro-1,3,4-thiadiazol-2-yl)ethan-1-one                  | S472-S476 |
| Computational Details                                                                                            | S477-S479 |

**General Information.** Reactions were conducted with magnetic stirring in air-dried glassware. All reagents and reaction solvents were used as received without any further purification. Analytical thin-layer chromatography (TLC) was used to follow the progress of reactions and was carried out on precoated silica gel plates (HSGF 254) and visualized under UV irradiation (254 nm). <sup>1</sup>H and <sup>13</sup>C NMR spectra were recorded in DMSO-d<sub>6</sub> or CDCl<sub>3</sub> on a Bruker DPX 300 and 75 MHz NMR spectrometer and on a Varian 400 and 100 MHz NMR spectrometer. The NMR chemical shifts (δ) are reported in parts per million (ppm) relative to the residual solvent peak (<sup>1</sup>H-NMR δ 7.26 for CDCl<sub>3</sub>, δ 2.50 for DMSO-d<sub>6</sub>; <sup>13</sup>C-NMR δ 77.0 for CDCl<sub>3</sub>, δ 39.52 for DMSO-d<sub>6</sub>).

$^1\text{H}$  NMR ( $\text{CDCl}_3$ ) spectrum of (Z)-2-oxo-N-phenylpropanehydrazonoyl chloride (**29a**)

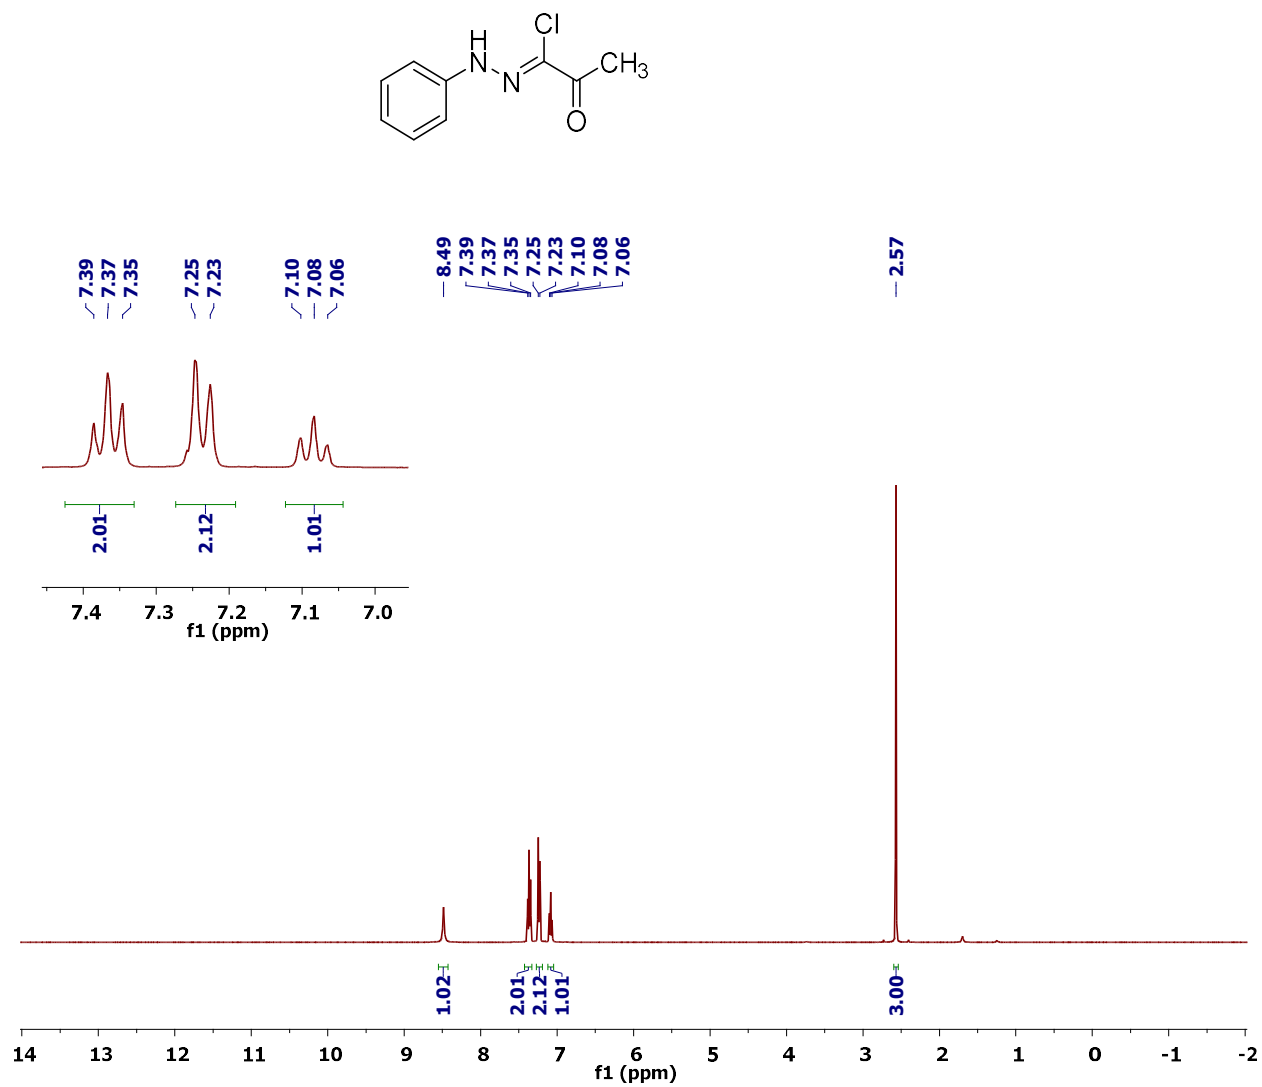

$^{13}\text{C}$  NMR ( $\text{CDCl}_3$ ) spectrum of (Z)-2-oxo-N-phenylpropanehydrazonoyl chloride

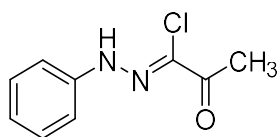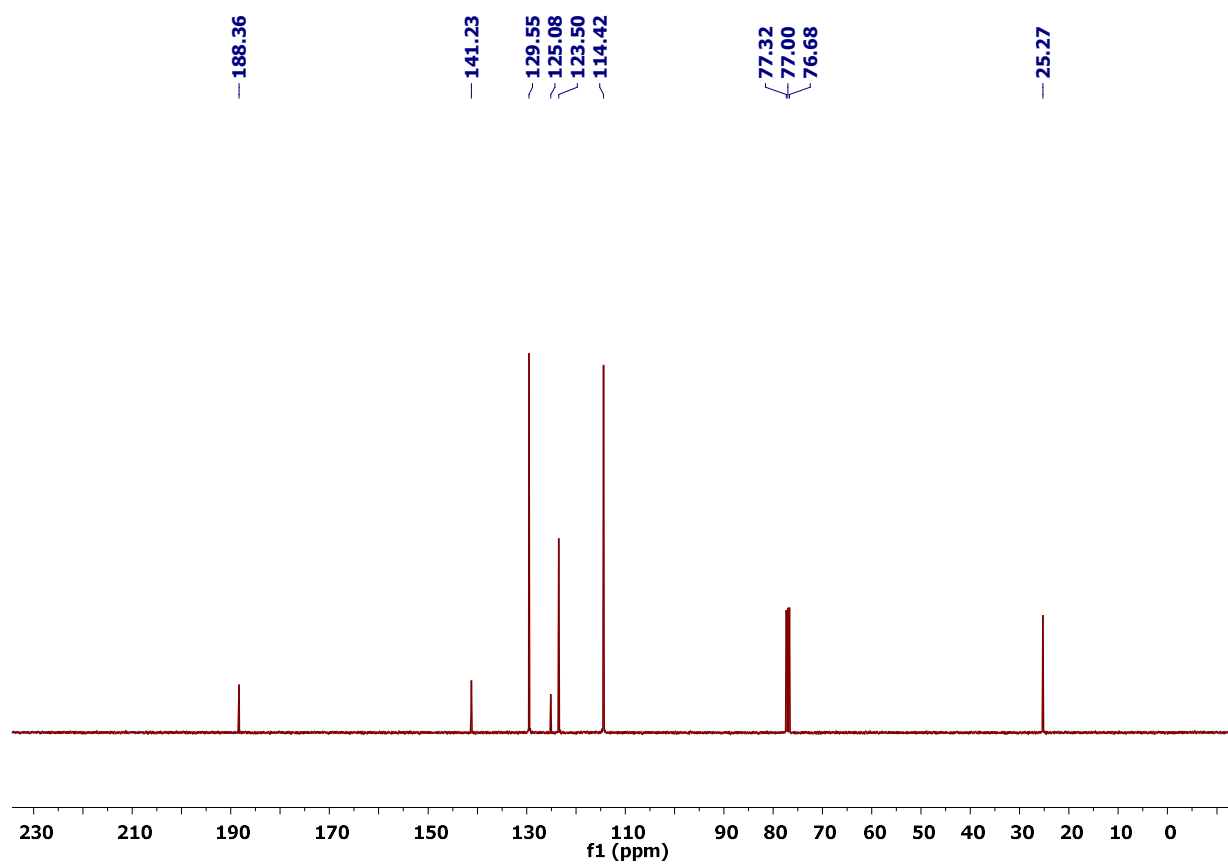



$^{13}\text{C}$  CRAPT NMR ( $\text{CDCl}_3$ ) spectrum of (Z)-2-oxo-N-phenylpropanehydrazonoyl chloride

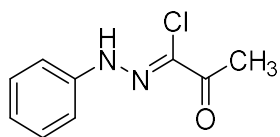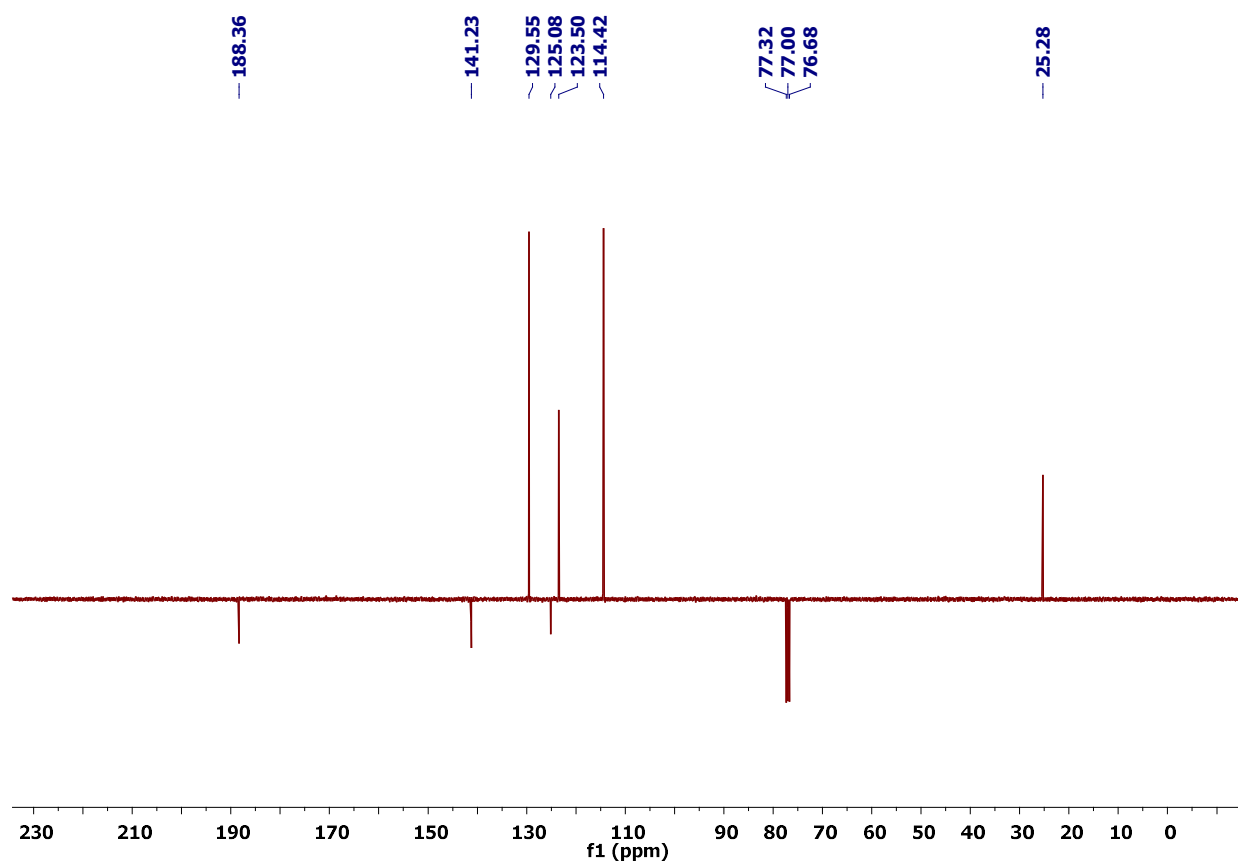

$^1\text{H}$ - $^1\text{H}$ -gDQCOSY NMR ( $\text{CDCl}_3$ ) spectrum of (Z)-2-oxo-N-phenylpropanehydrazonoyl chloride

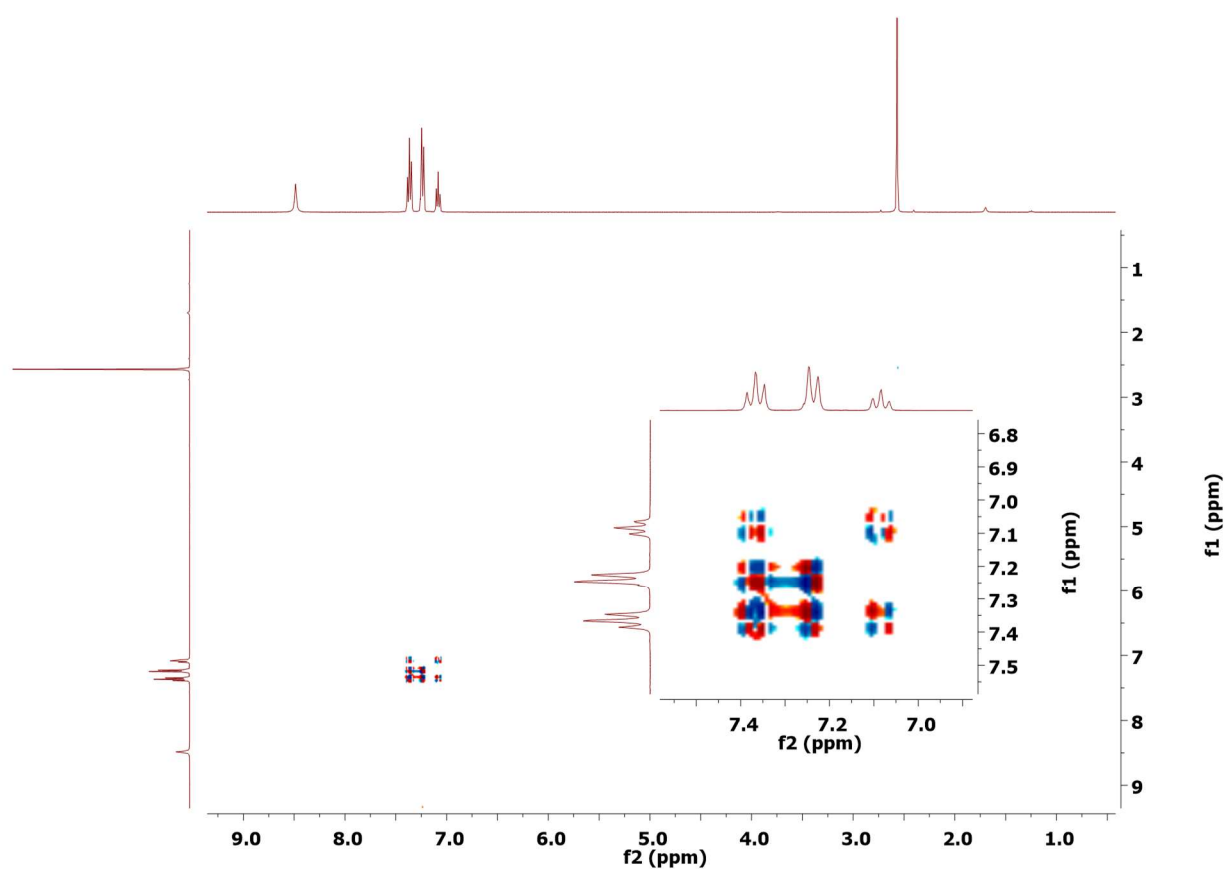

$^1\text{H}$ - $^{13}\text{C}$ -HSQC NMR ( $\text{CDCl}_3$ ) spectrum of (Z)-2-oxo-N-phenylpropanehydrazonoyl chloride

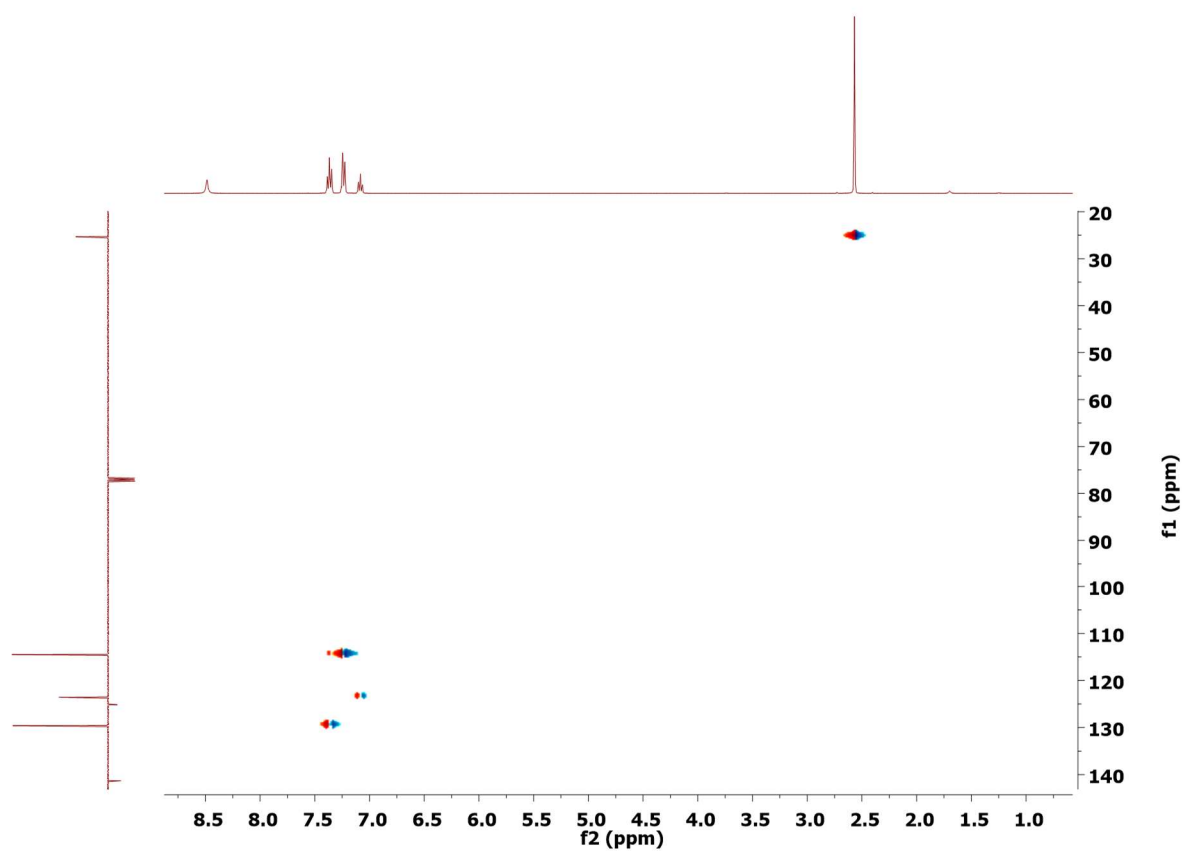

$^1\text{H}$ - $^{13}\text{C}$ -gHMBC NMR ( $\text{CDCl}_3$ ) spectrum of (Z)-2-oxo-N-phenylpropanehydrazonoyl chloride

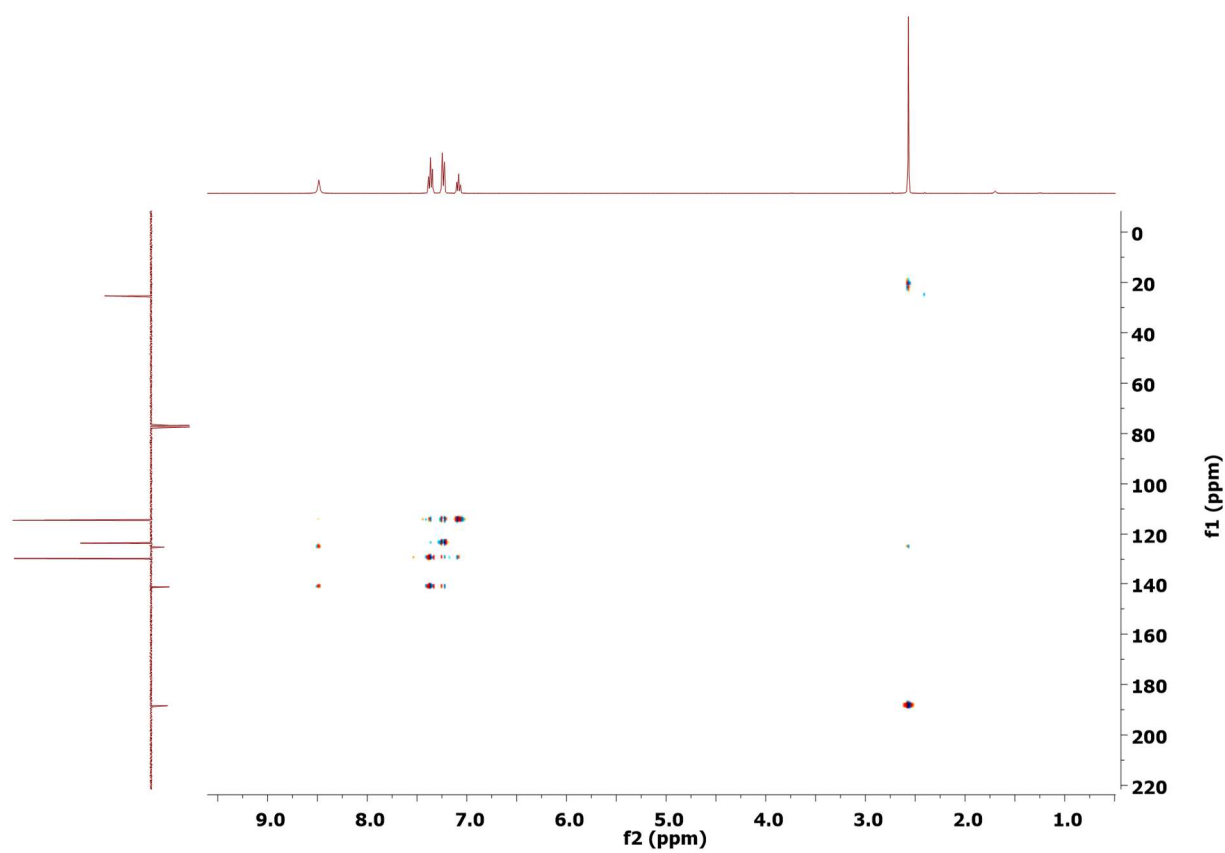

IR spectrum of (Z)-2-oxo-N-phenylpropanehydrazonoyl chloride

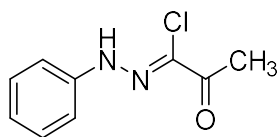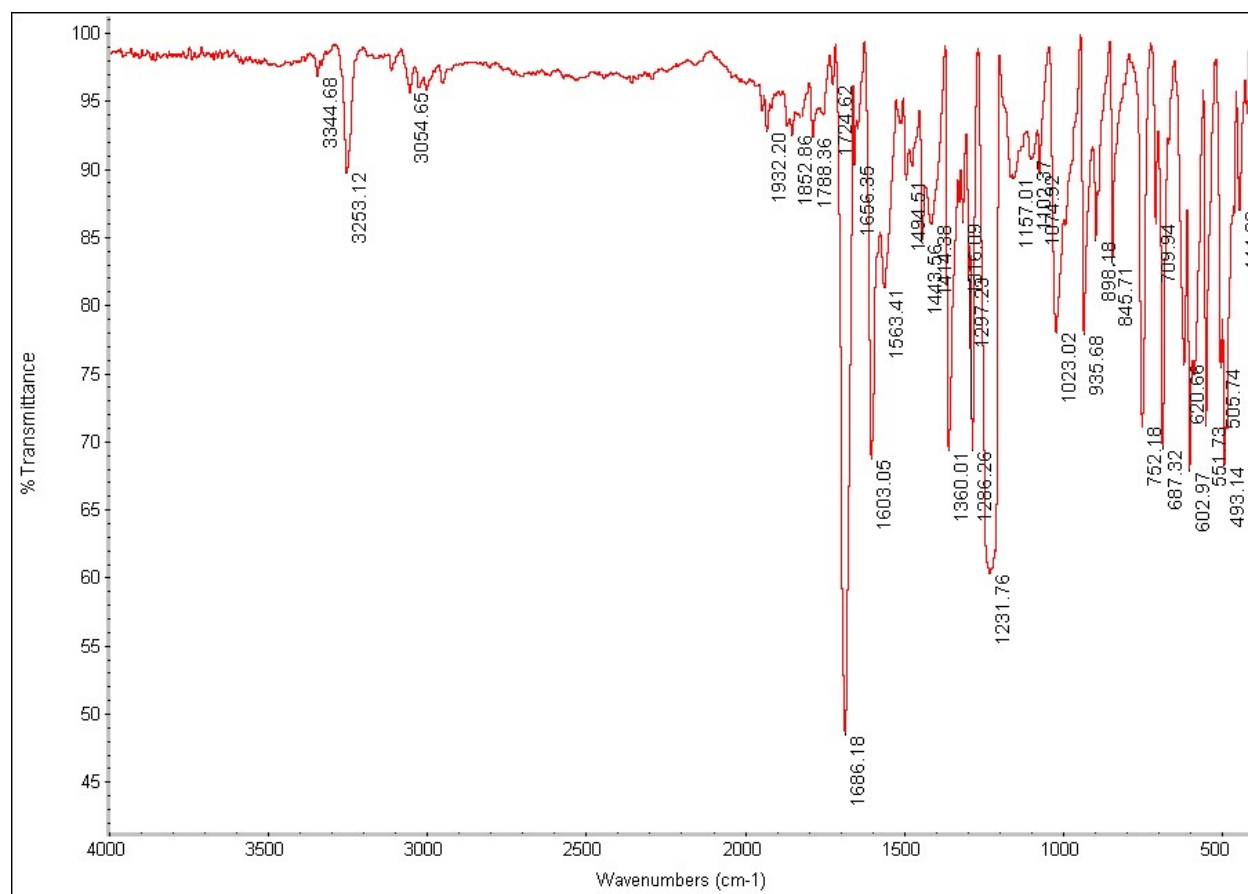

$^1\text{H}$  NMR ( $\text{CDCl}_3$ ) spectrum of (Z)-2-oxo-N-(p-tolyl)propanehydrazonoyl chloride (**29b**)

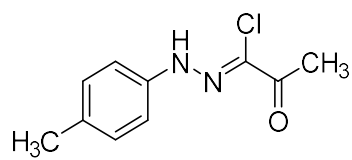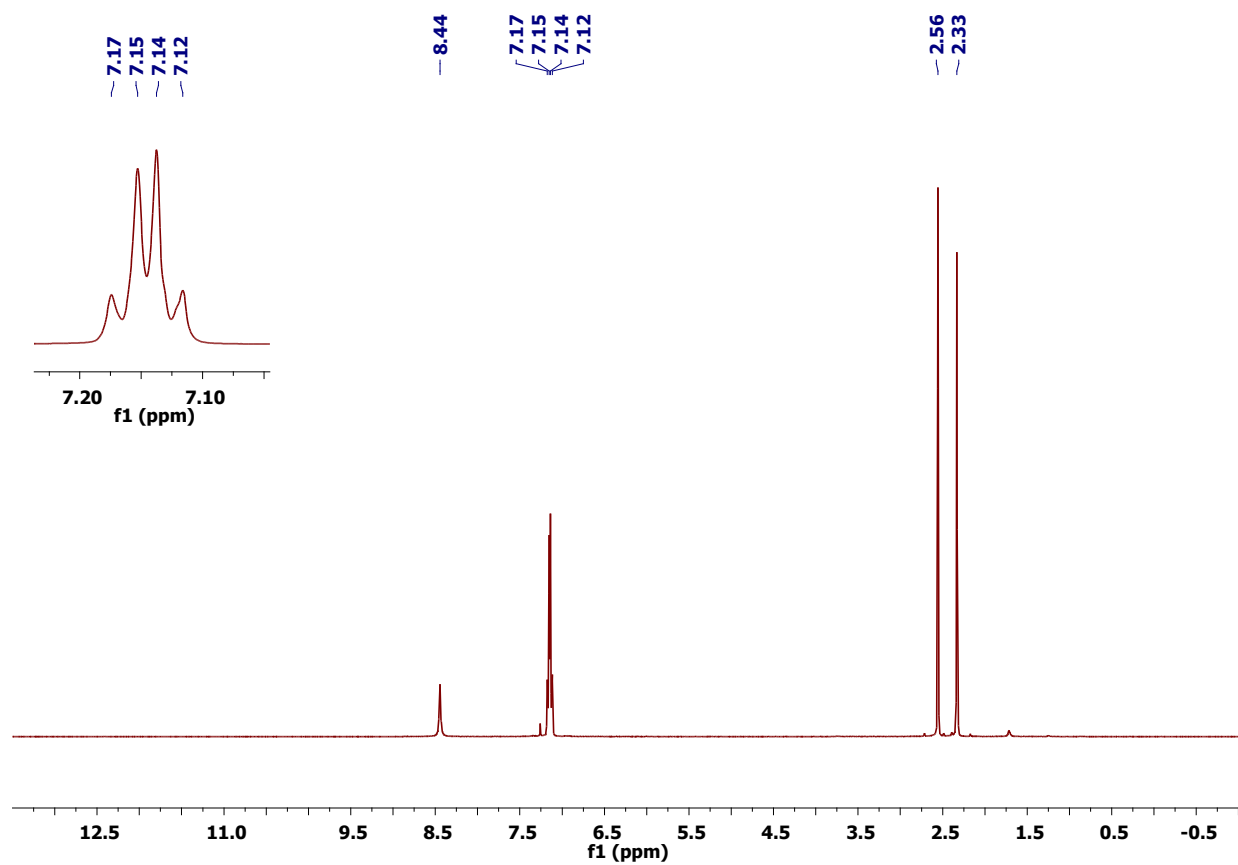

$^{13}\text{C}$  NMR ( $\text{CDCl}_3$ ) spectrum of (Z)-2-oxo-N-(p-tolyl)propanehydrazonoyl chloride

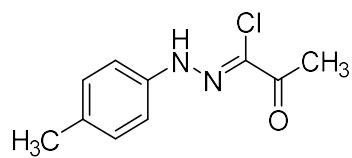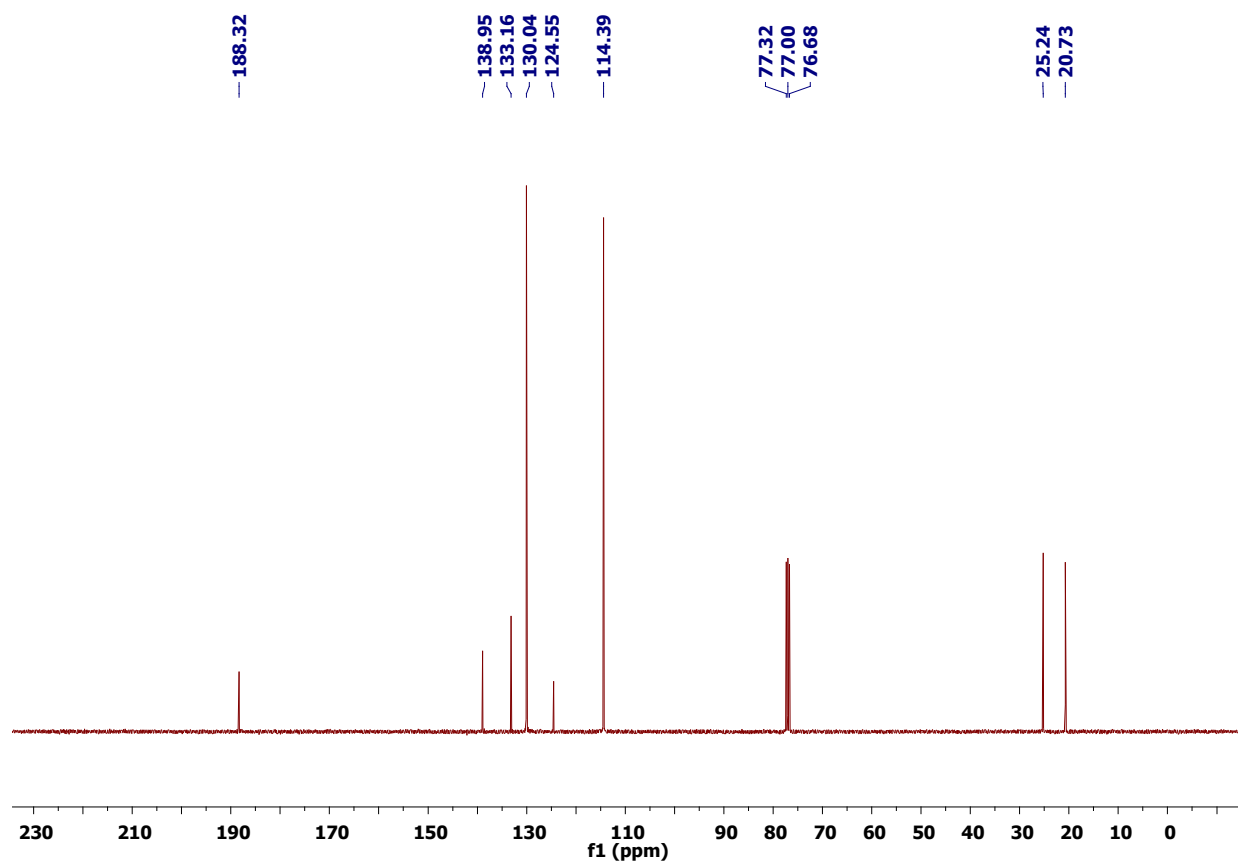

$^{13}\text{C}$  CRAPT NMR ( $\text{CDCl}_3$ ) spectrum of (Z)-2-oxo-N-(p-tolyl)propanehydrazonoyl chloride

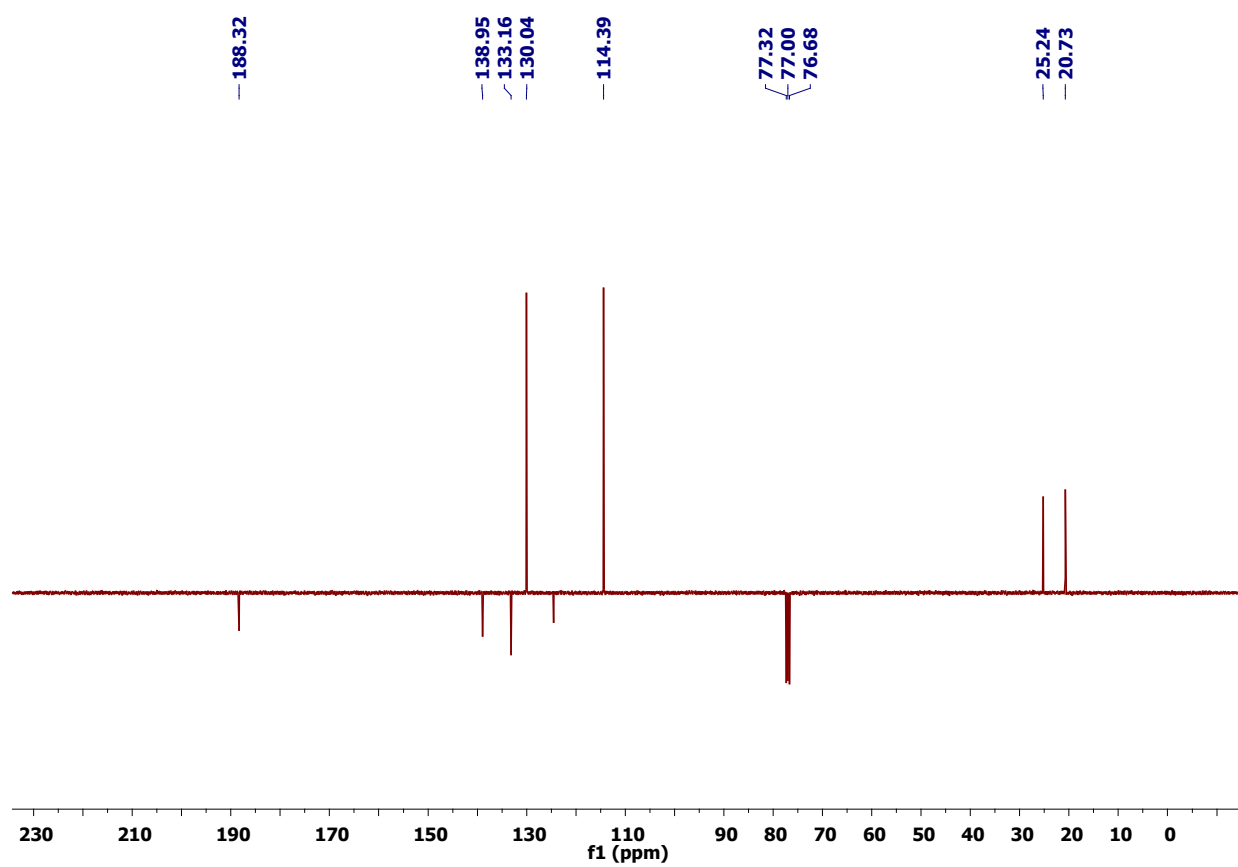



$^1\text{H}$ - $^1\text{H}$ -gDQCOSY NMR ( $\text{CDCl}_3$ ) spectrum of (Z)-2-oxo-N-(p-tolyl)propanehydrazonoyl chloride

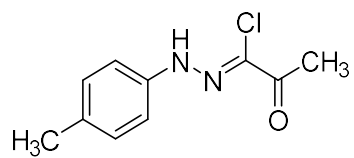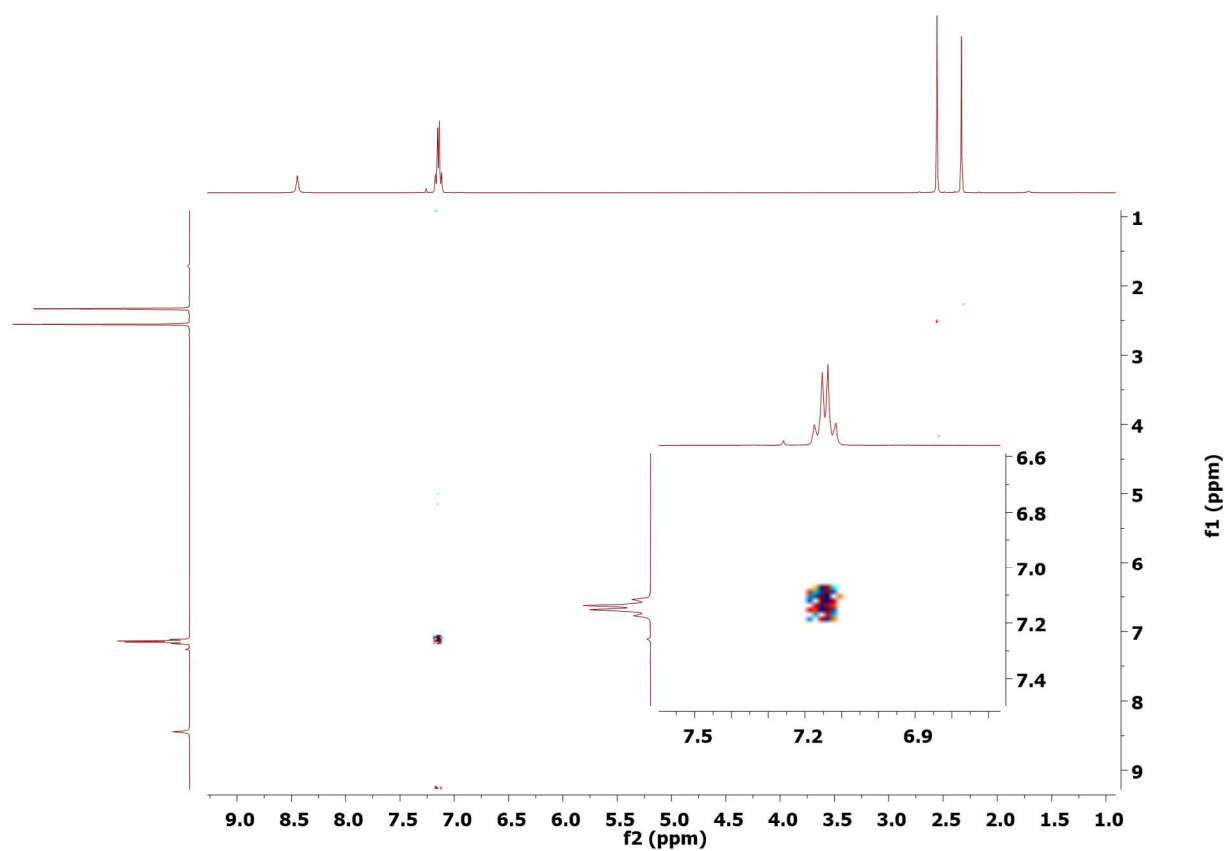

$^1\text{H}$ - $^{13}\text{C}$ -HSQC NMR ( $\text{CDCl}_3$ ) spectrum of (Z)-2-oxo-N-(p-tolyl)propanehydrazonoyl chloride

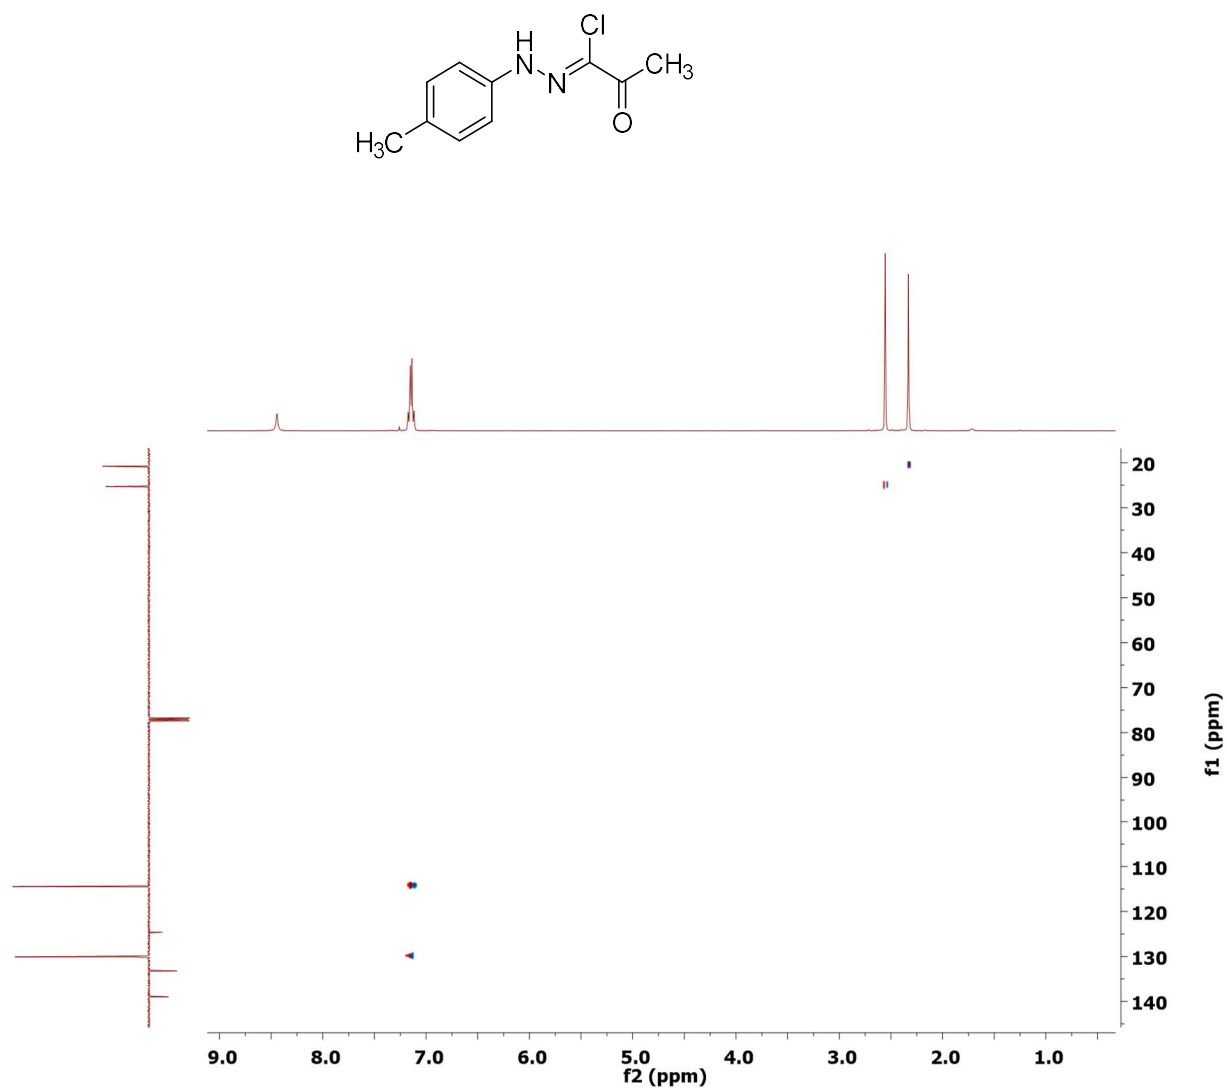

$^1\text{H}$ - $^{13}\text{C}$ -gHMBC NMR ( $\text{CDCl}_3$ ) spectrum of (Z)-2-oxo-N-(p-tolyl)propanehydrazonoyl chloride

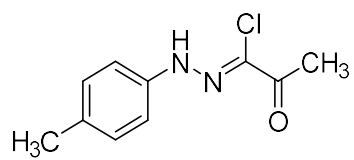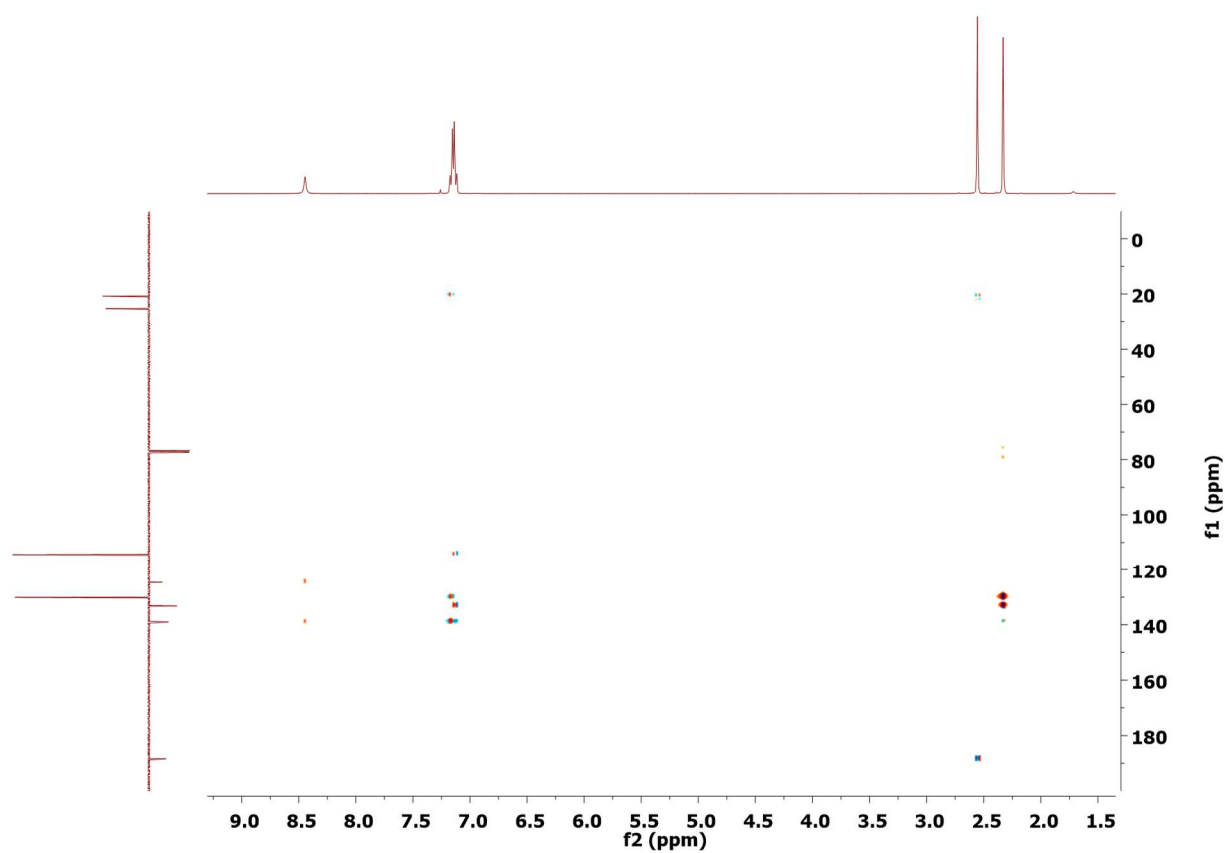

IR spectrum of (Z)-2-oxo-N-(p-tolyl)propanehydrazonoyl chloride

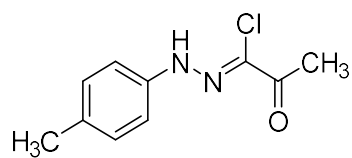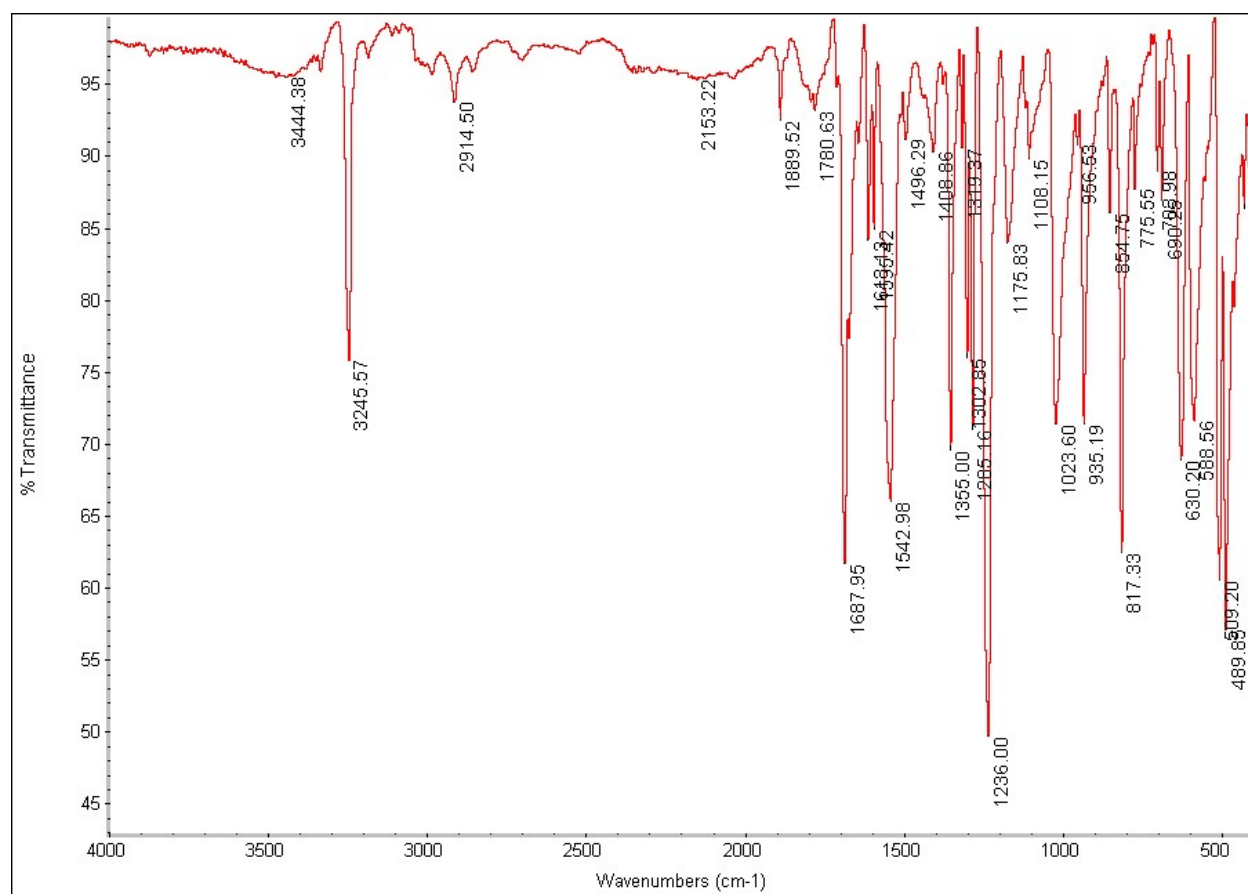

$^1\text{H}$  NMR (DMSO- $d_6$ ) spectrum of (Z)-N-(4-chlorophenyl)-2-oxopropanhydrazonoyl chloride (**29c**)

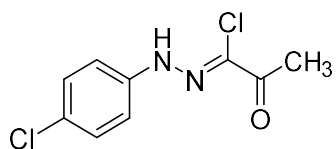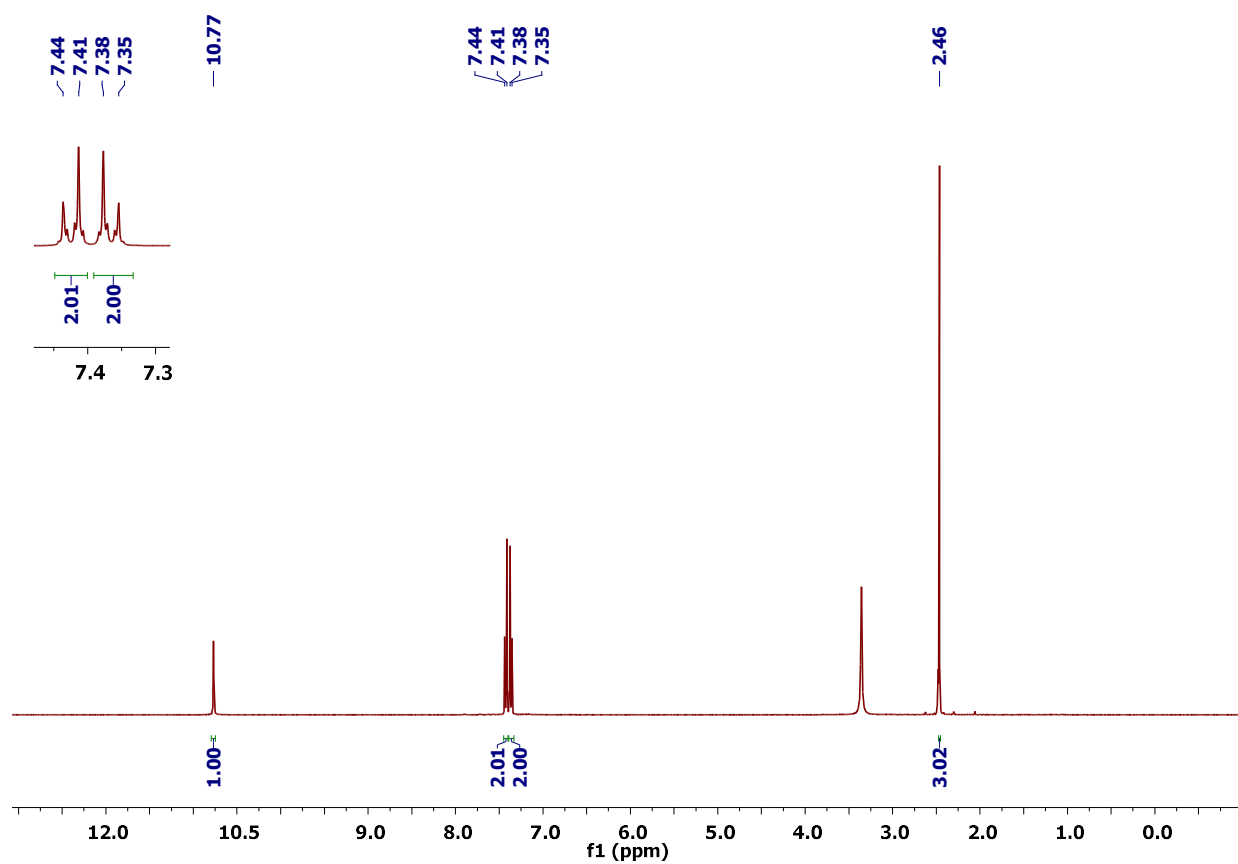

$^{13}\text{C}$  NMR (DMSO- $\text{d}_6$ ) spectrum of (Z)-N-(4-chlorophenyl)-2-oxopropanehydrazonoyl chloride

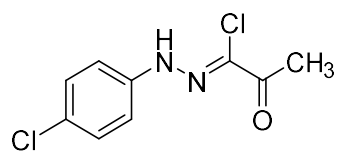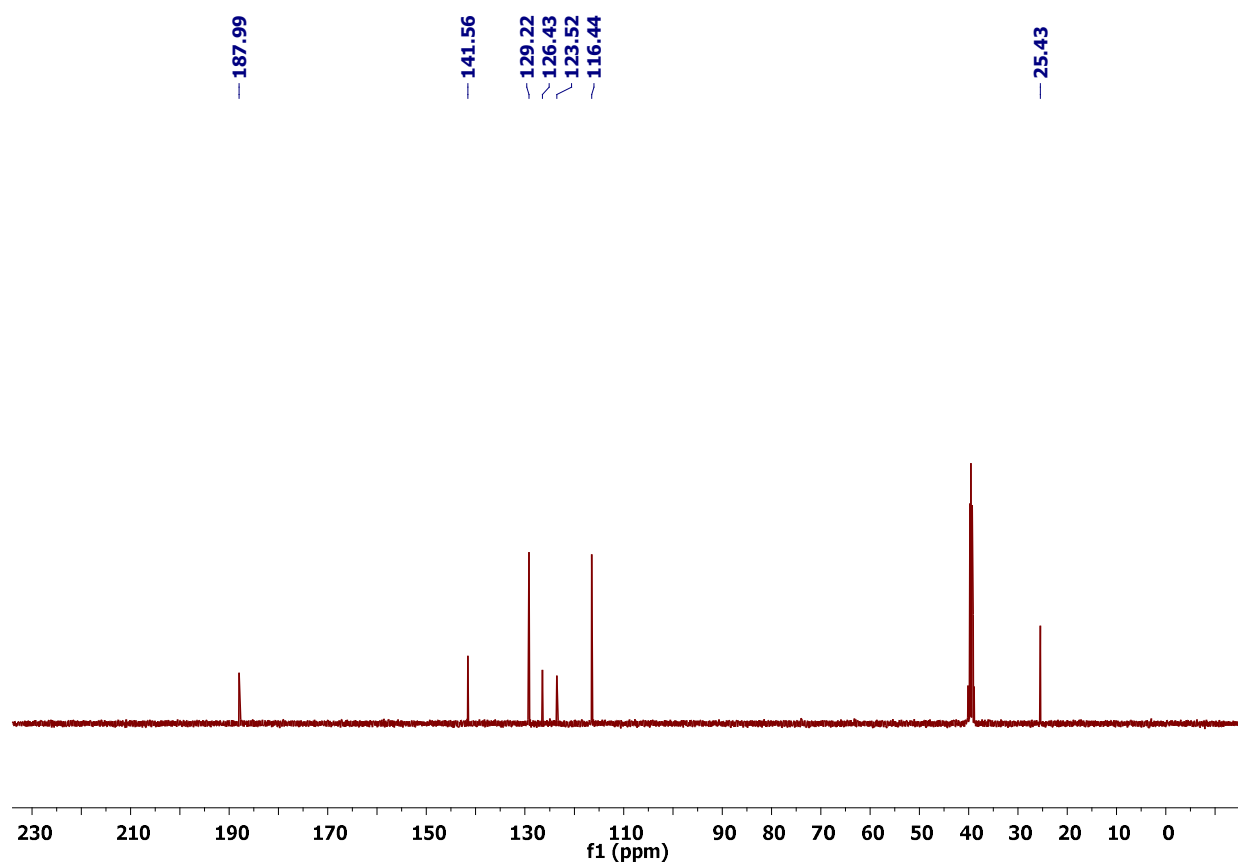

$^{13}\text{C}$  CRAPT NMR ( $\text{DMSO-d}_6$ ) spectrum of (Z)-N-(4-chlorophenyl)-2-oxopropanehydrazonoyl chloride

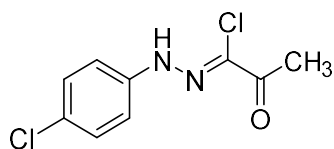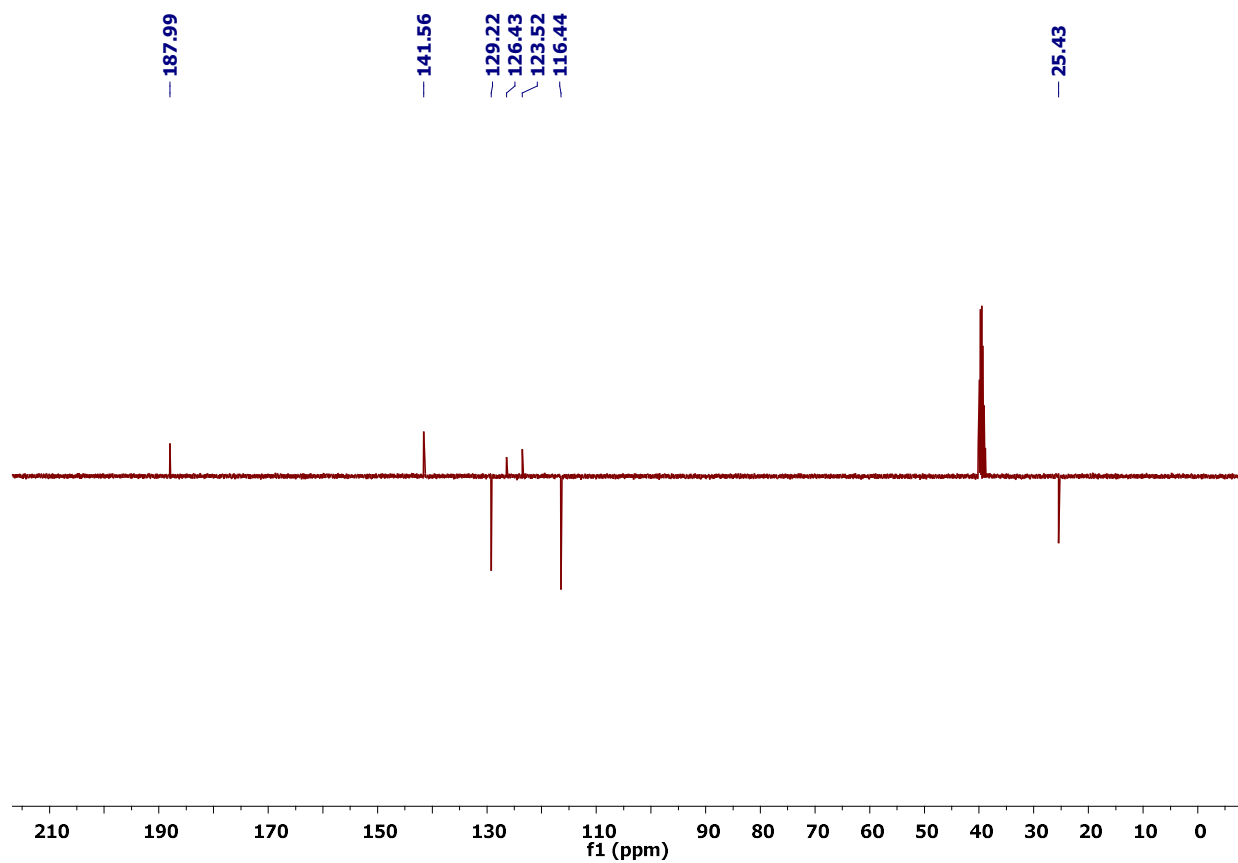

IR spectrum of (Z)-N-(4-chlorophenyl)-2-oxopropanehydrazonoyl chloride

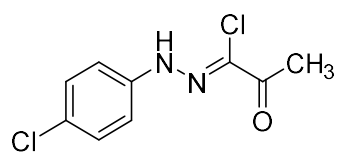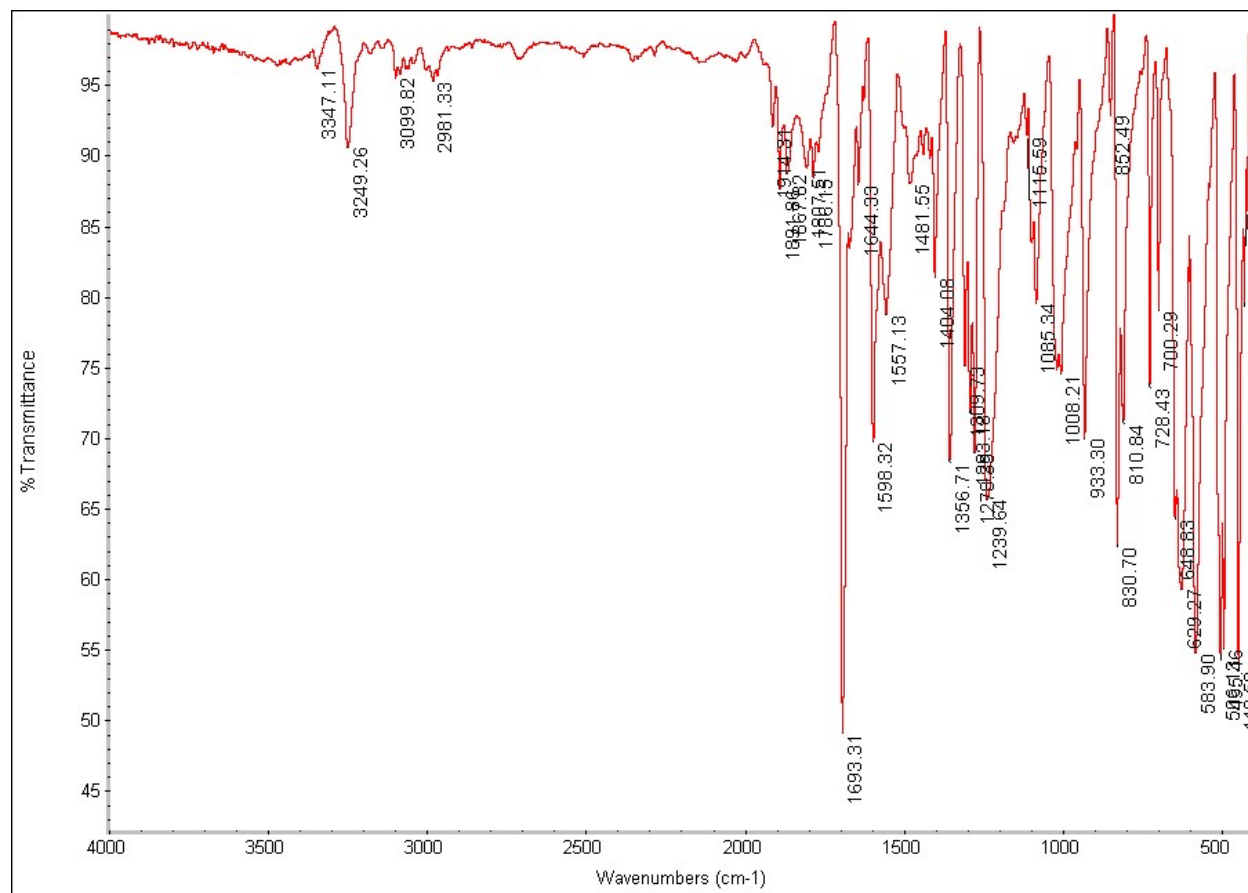



$^1\text{H}$  NMR ( $\text{CDCl}_3$ ) spectrum of (Z)-N-(4-bromophenyl)-2-oxopropanehydrazonoyl chloride (**29d**)

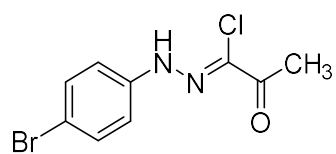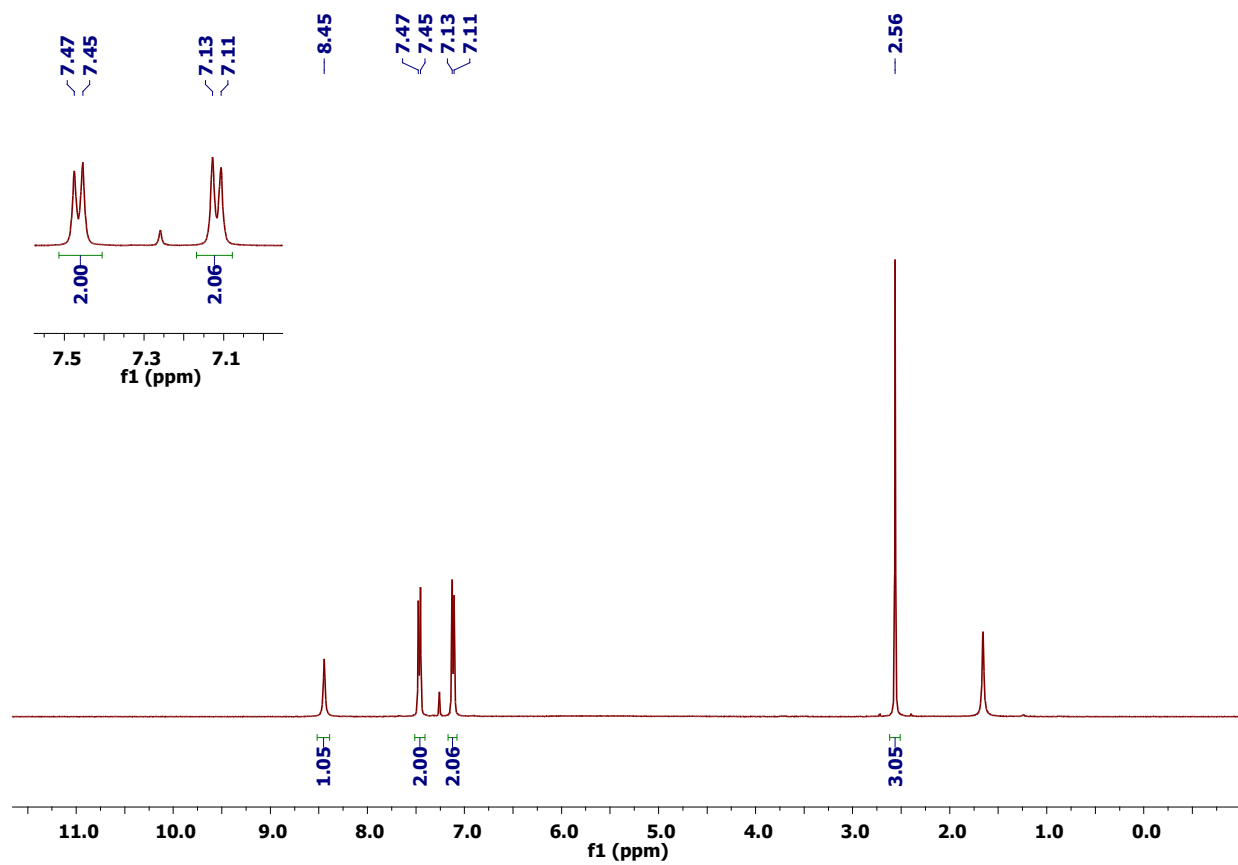

$^{13}\text{C}$  NMR ( $\text{CDCl}_3$ ) spectrum of (Z)-N-(4-bromophenyl)-2-oxopropanehydrazonoyl chloride

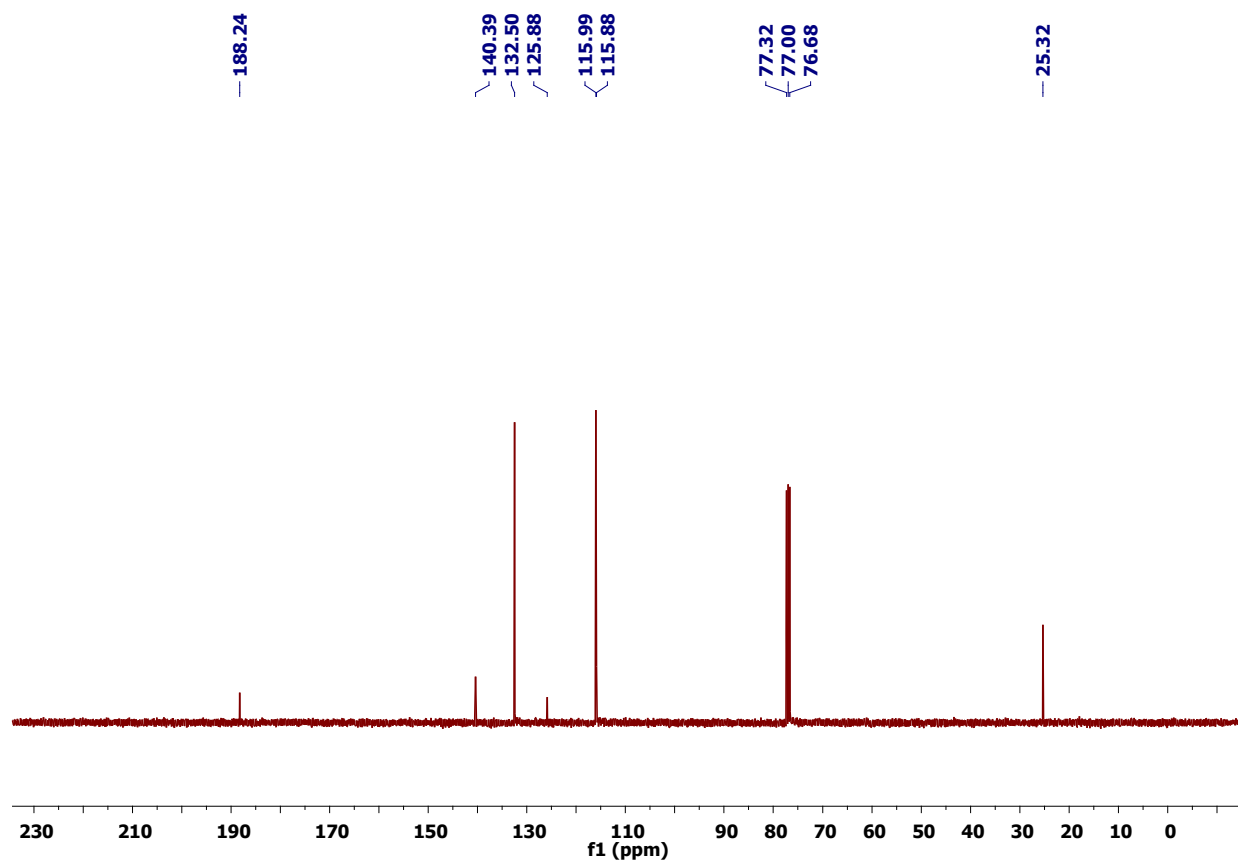

$^{13}\text{C}$  CRAPT NMR ( $\text{CDCl}_3$ ) spectrum of (Z)-N-(4-bromophenyl)-2-oxopropanehydrazonoyl chloride

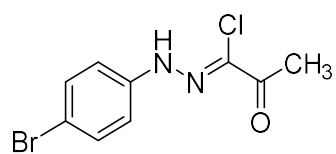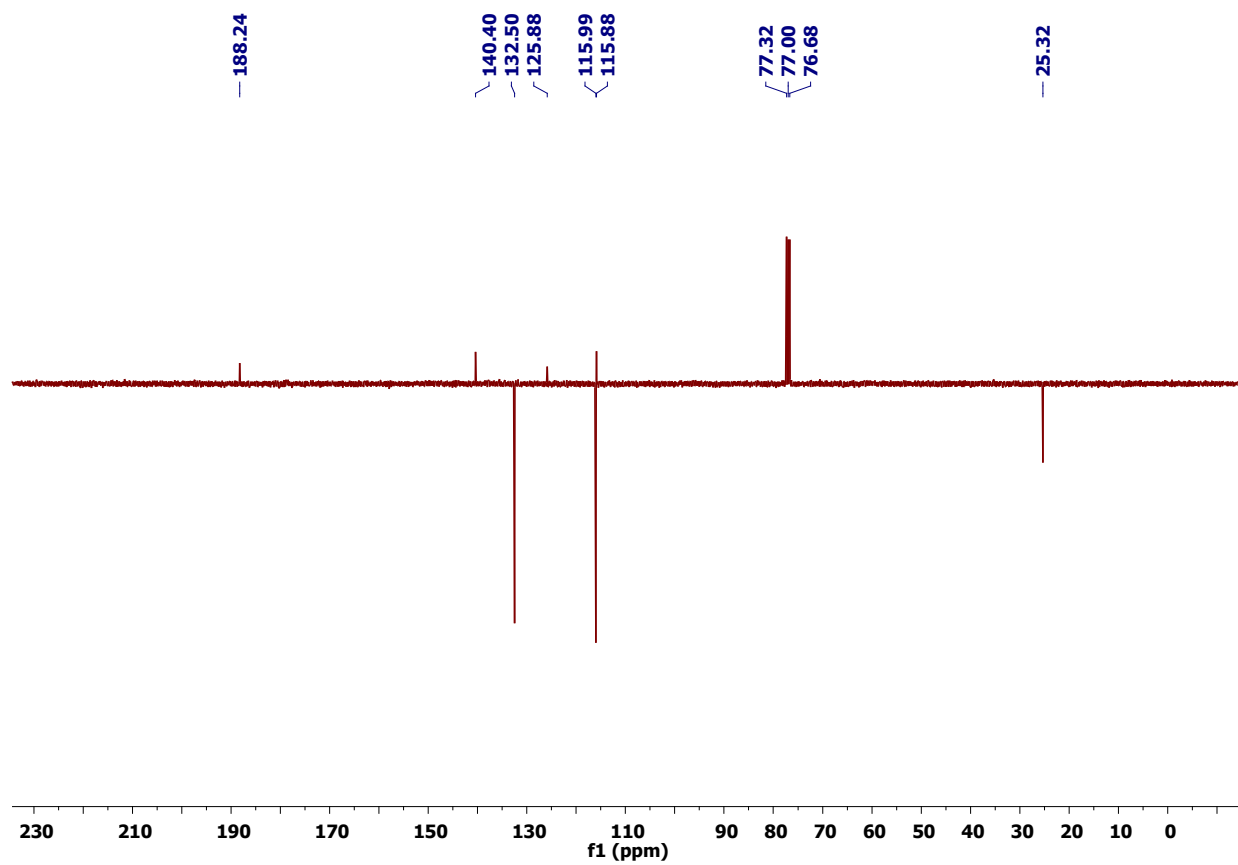

$^1\text{H}$ - $^{13}\text{C}$ -HSQC NMR ( $\text{CDCl}_3$ ) spectrum of (Z)-N-(4-bromophenyl)-2-chloro-2-oxopropanehydrazonoyl chloride

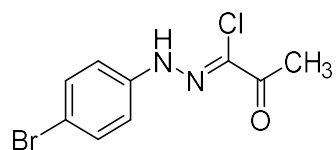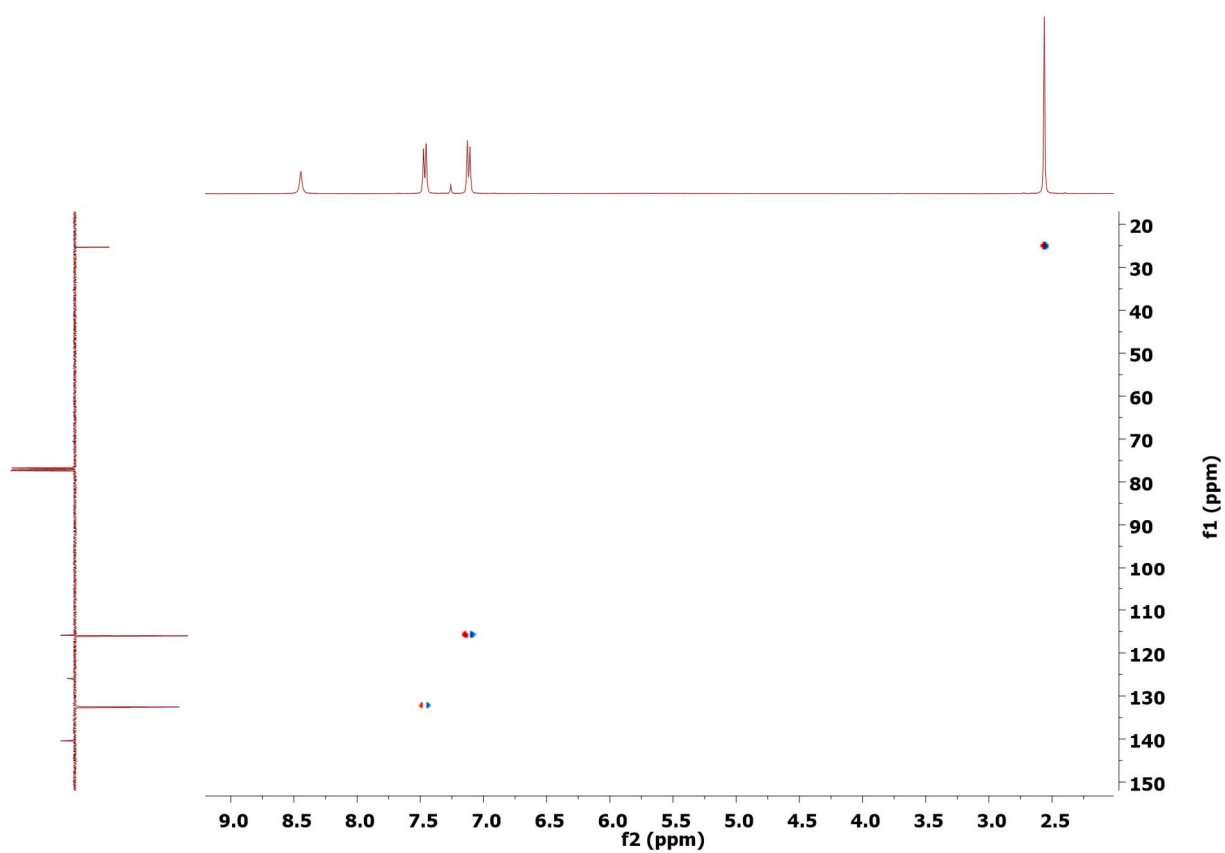

$^1\text{H}$ - $^{13}\text{C}$ -gHMBC NMR ( $\text{CDCl}_3$ ) spectrum of (Z)-N-(4-bromophenyl)-2-chloro-3-oxopropanehydrazonoyl chloride

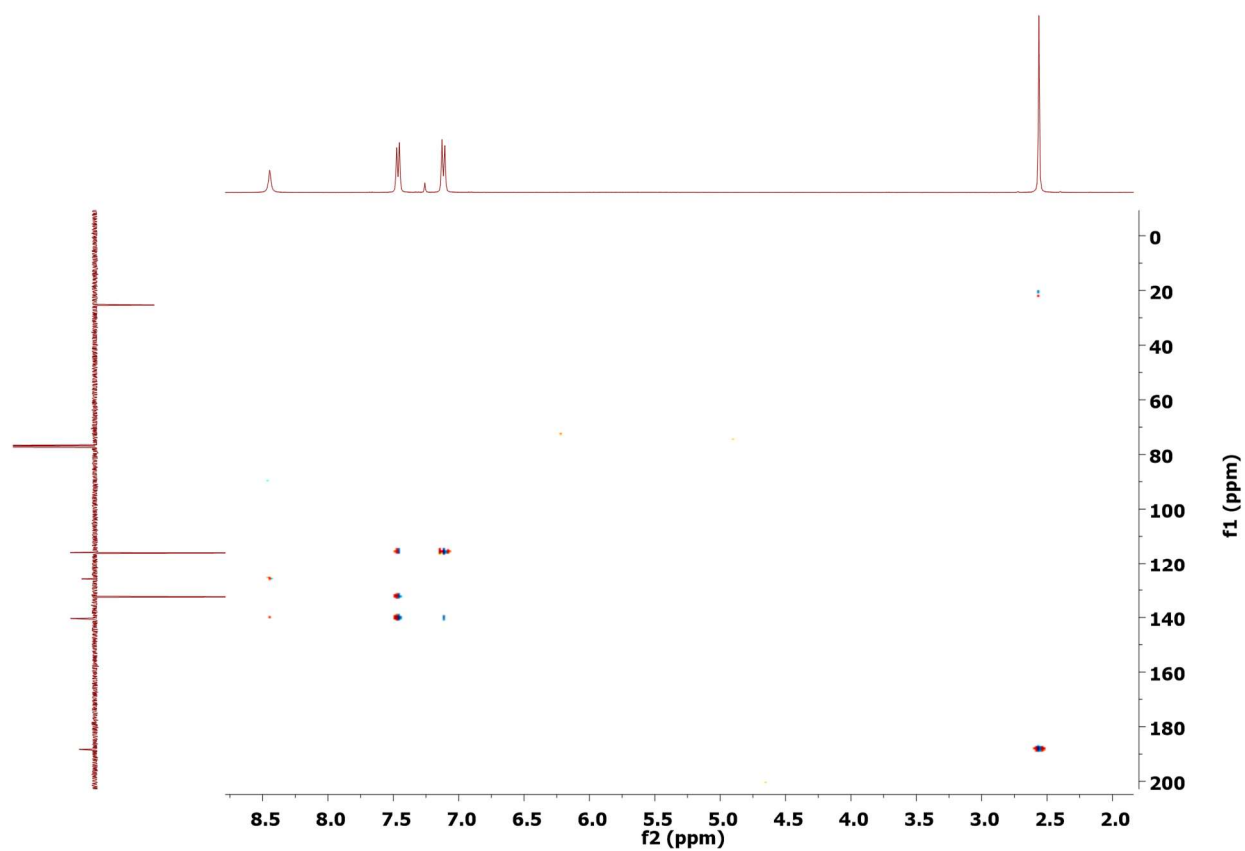

IR spectrum of (Z)-N-(4-bromophenyl)-2-oxopropanehydrazonoyl chloride

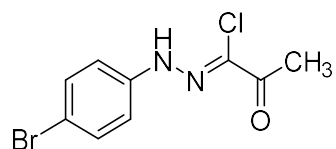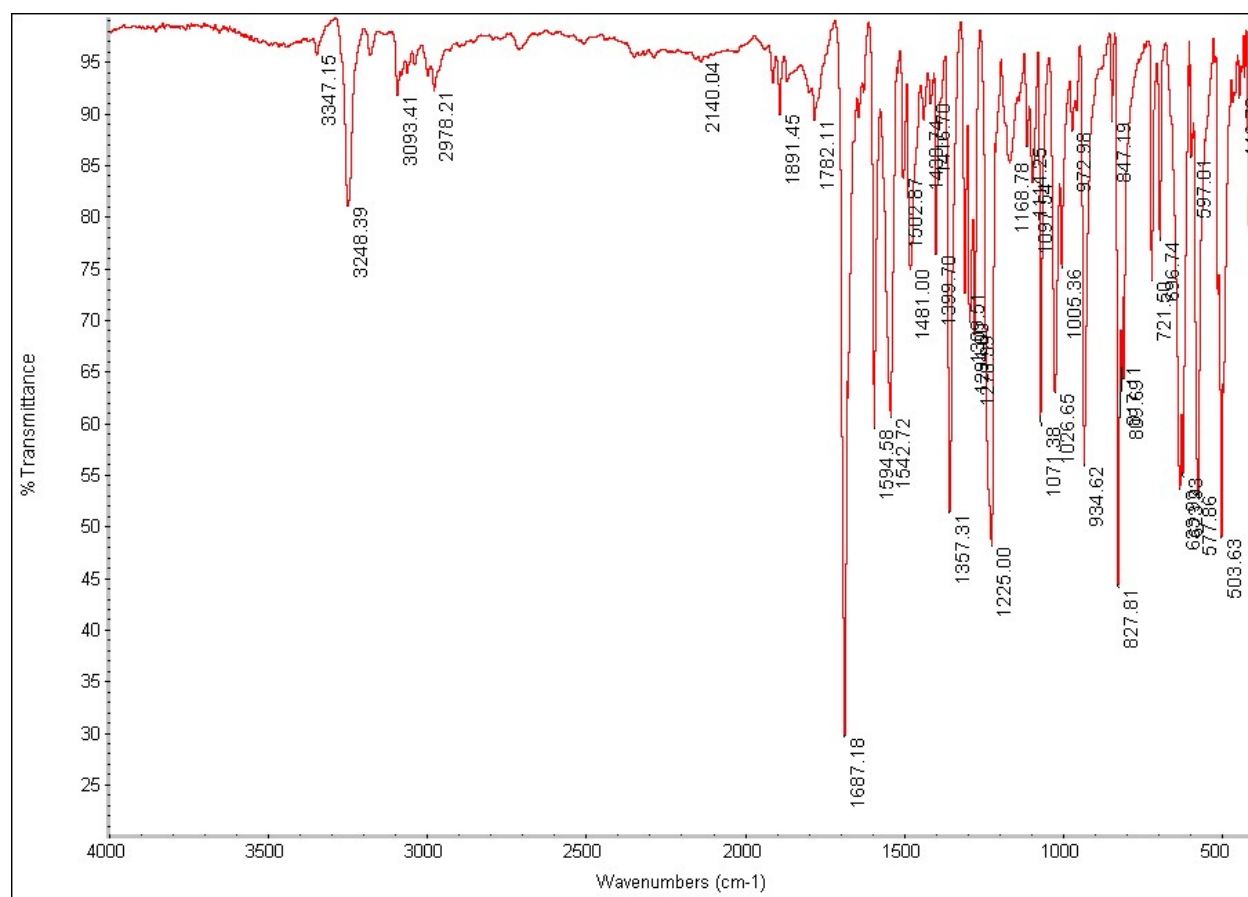

$^1\text{H}$  NMR ( $\text{CDCl}_3$ ) spectrum of (Z)-N-(4-iodophenyl)-2-oxopropanehydrazonoyl chloride (**29e**)

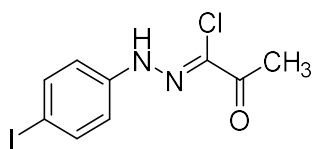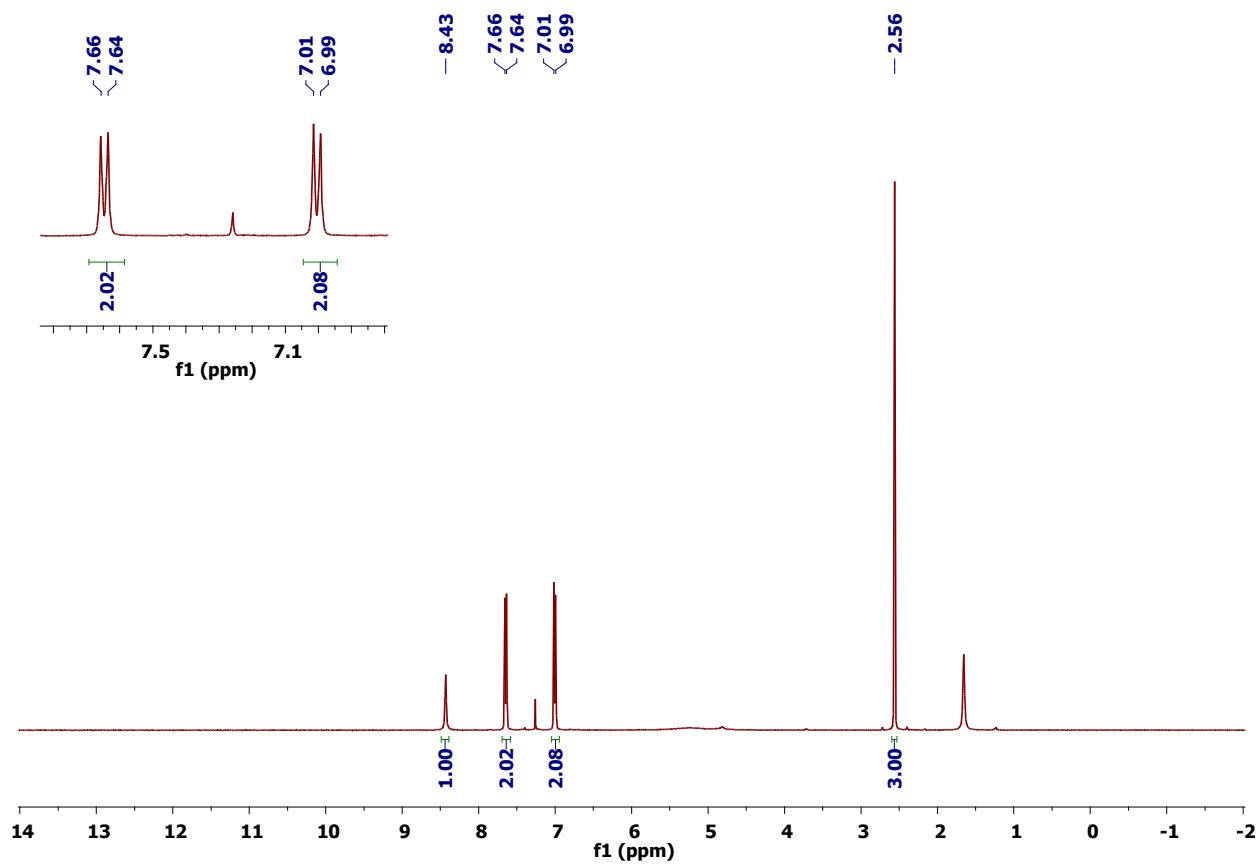

$^{13}\text{C}$  NMR ( $\text{CDCl}_3$ ) spectrum of (Z)-N-(4-iodophenyl)-2-oxopropanehydrazonoyl chloride

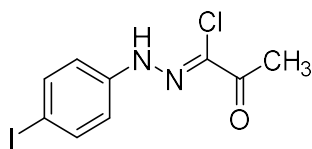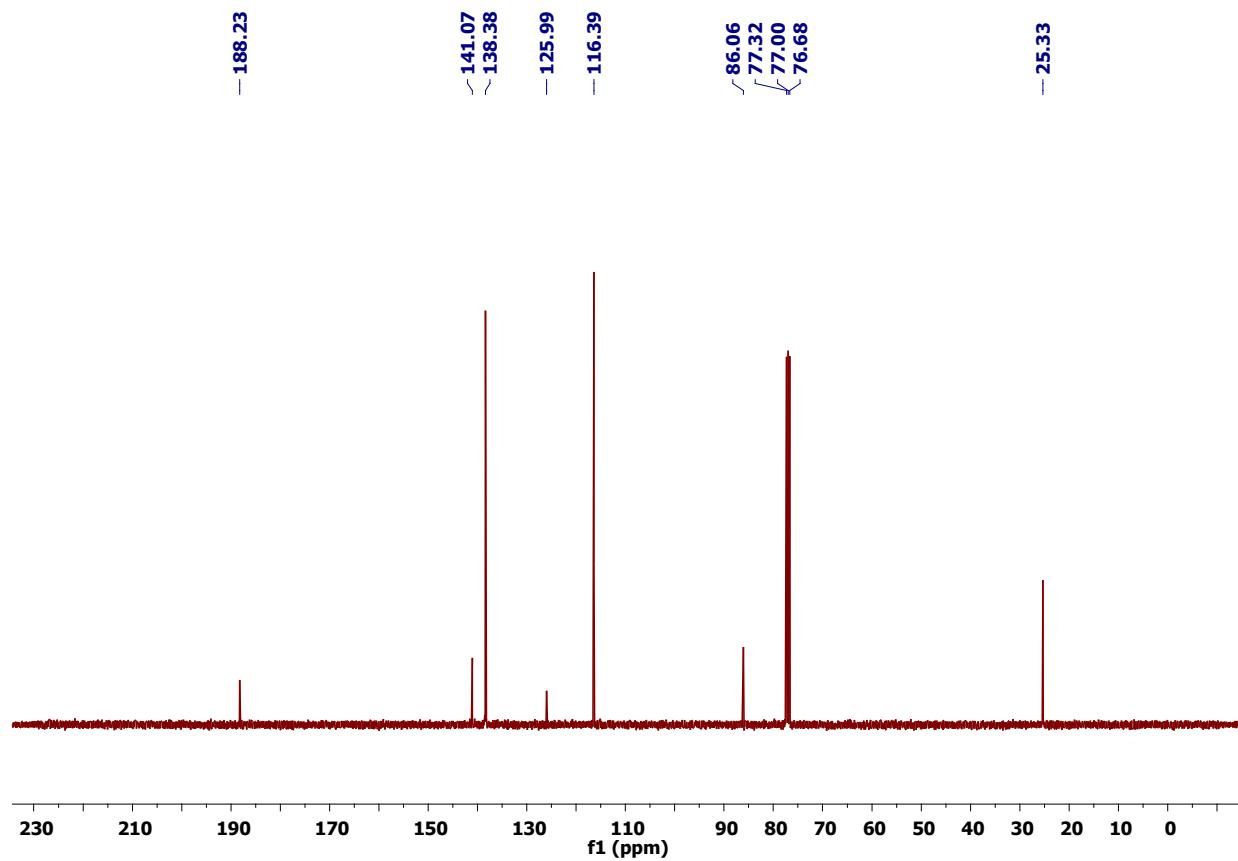



$^{13}\text{C}$  CRAPT NMR ( $\text{CDCl}_3$ ) spectrum of (Z)-N-(4-iodophenyl)-2-oxopropanehydrazonoyl chloride

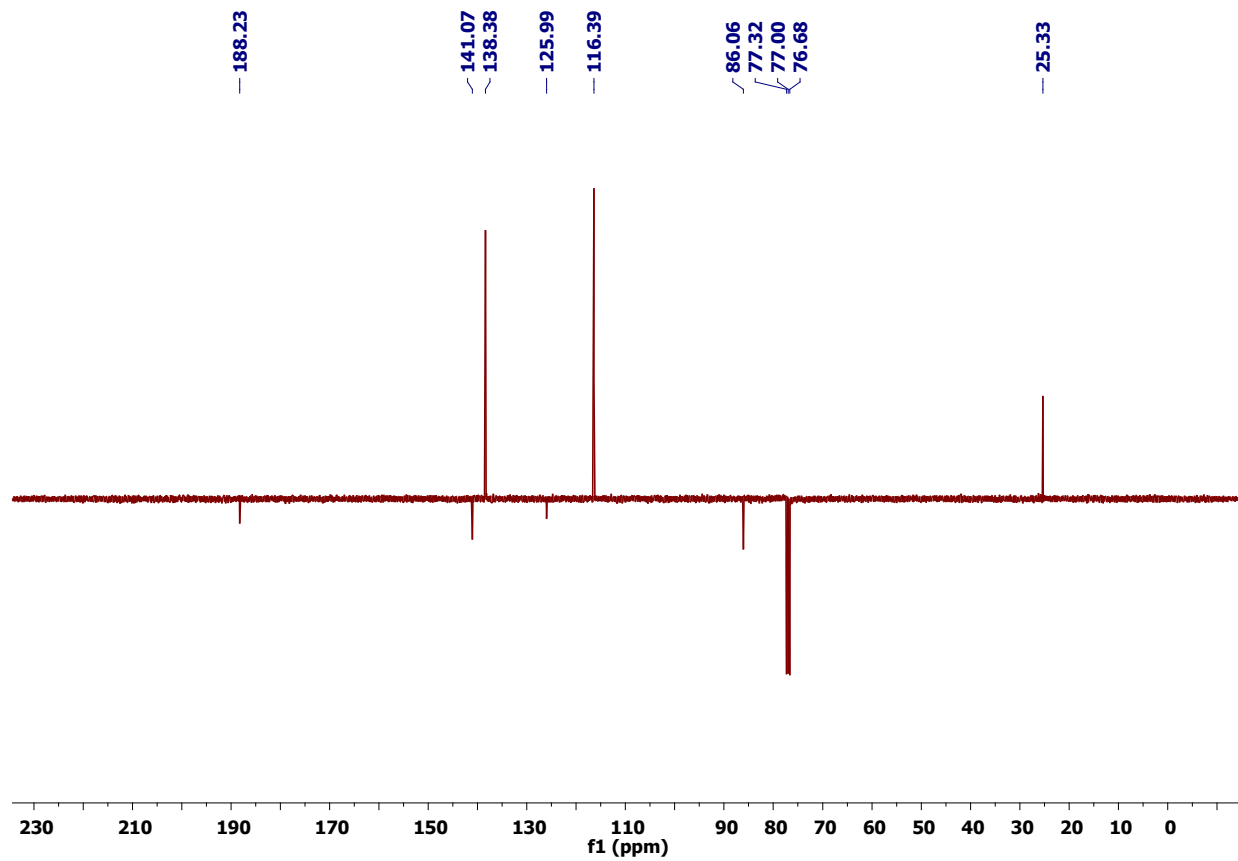

$^1\text{H}$ - $^1\text{H}$ -gDQCOSY NMR ( $\text{CDCl}_3$ ) spectrum of (Z)-N-(4-iodophenyl)-2-oxopropanehydrazonoyl chloride

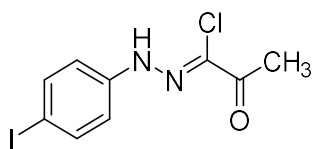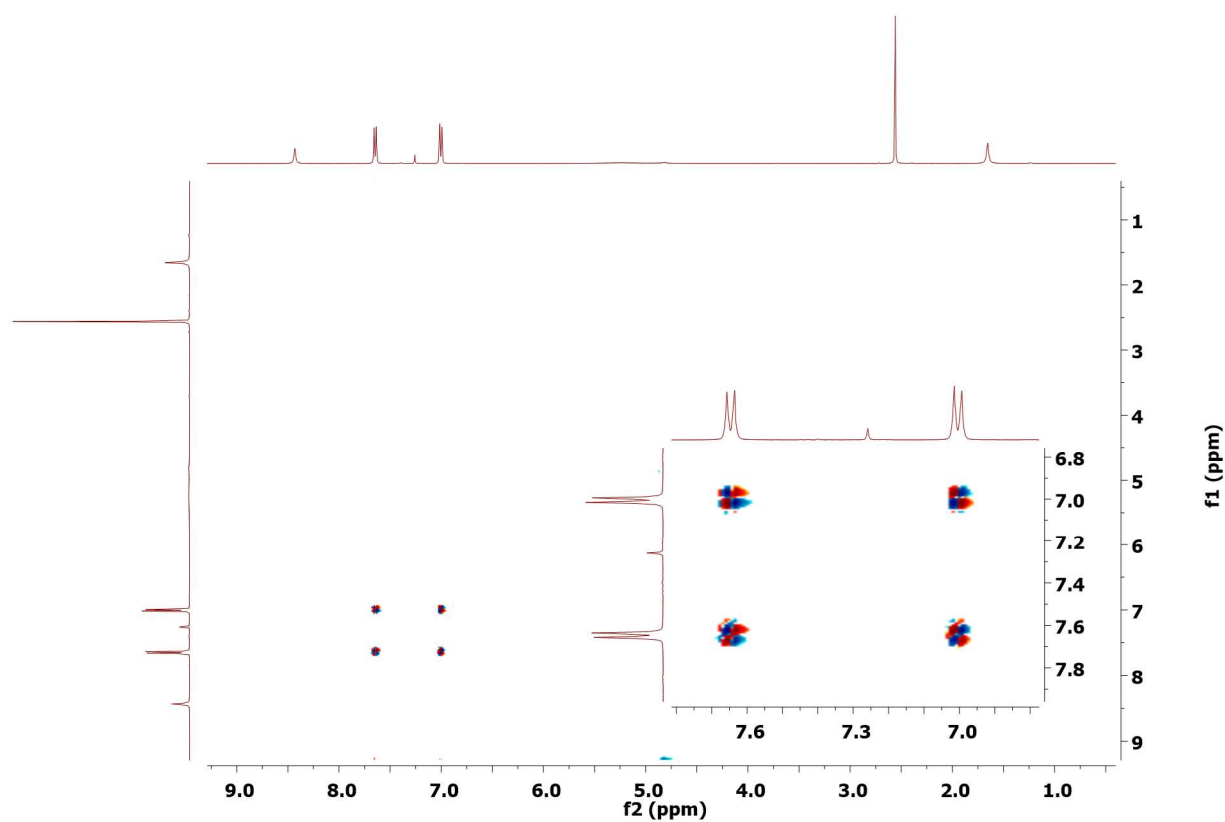

$^1\text{H}$ - $^{13}\text{C}$ -HSQC NMR ( $\text{CDCl}_3$ ) spectrum of (Z)-N-(4-iodophenyl)-2-oxopropanehydrazonoyl chloride

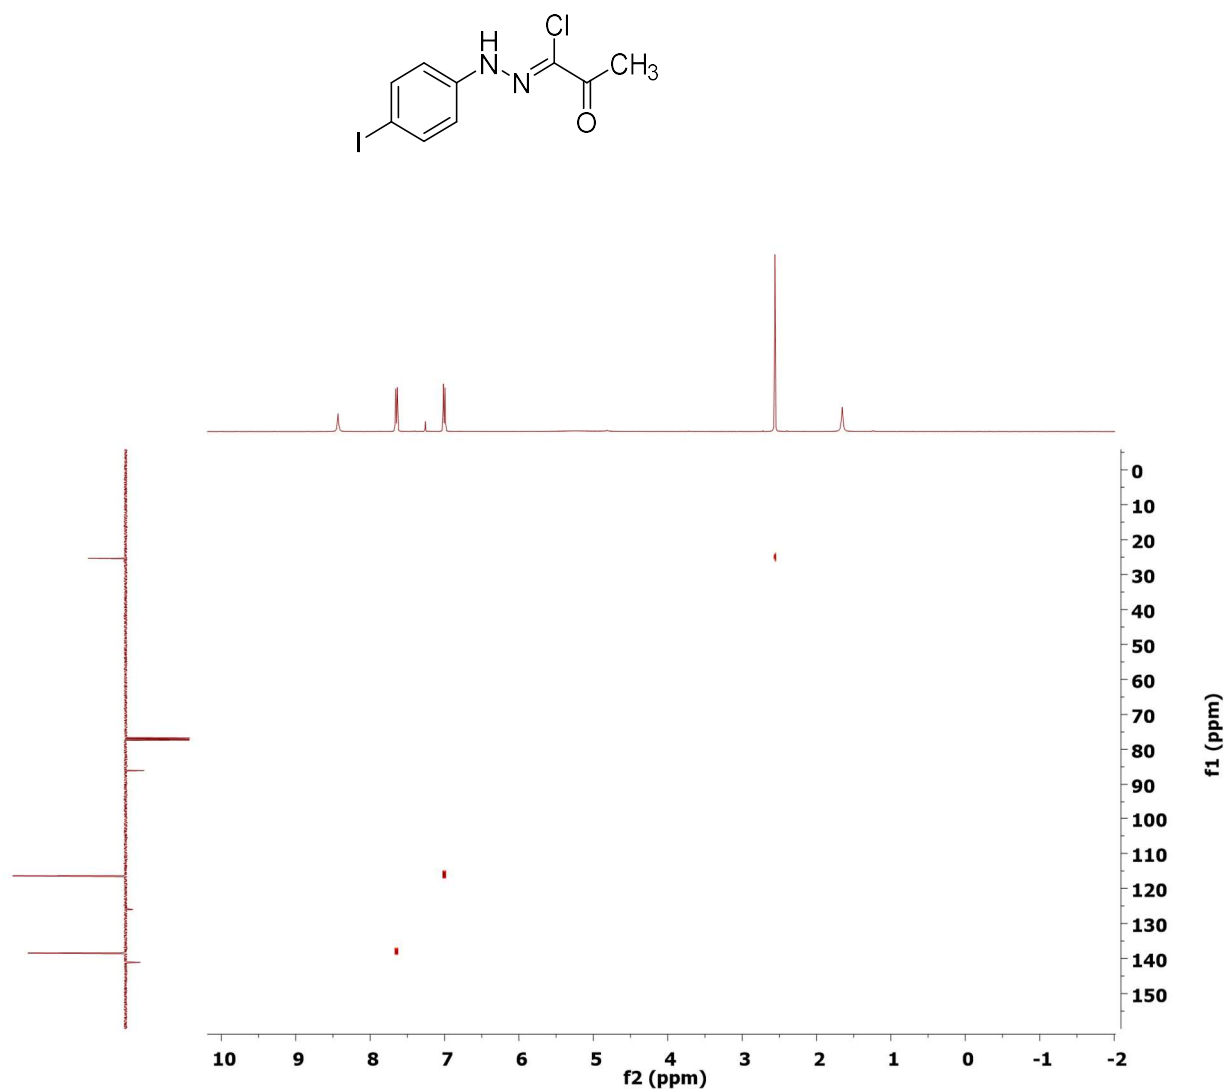

$^1\text{H}$ - $^{13}\text{C}$ -gHMBC NMR ( $\text{CDCl}_3$ ) spectrum of (Z)-N-(4-iodophenyl)-2-oxopropanehydrazonoyl chloride

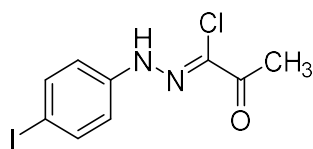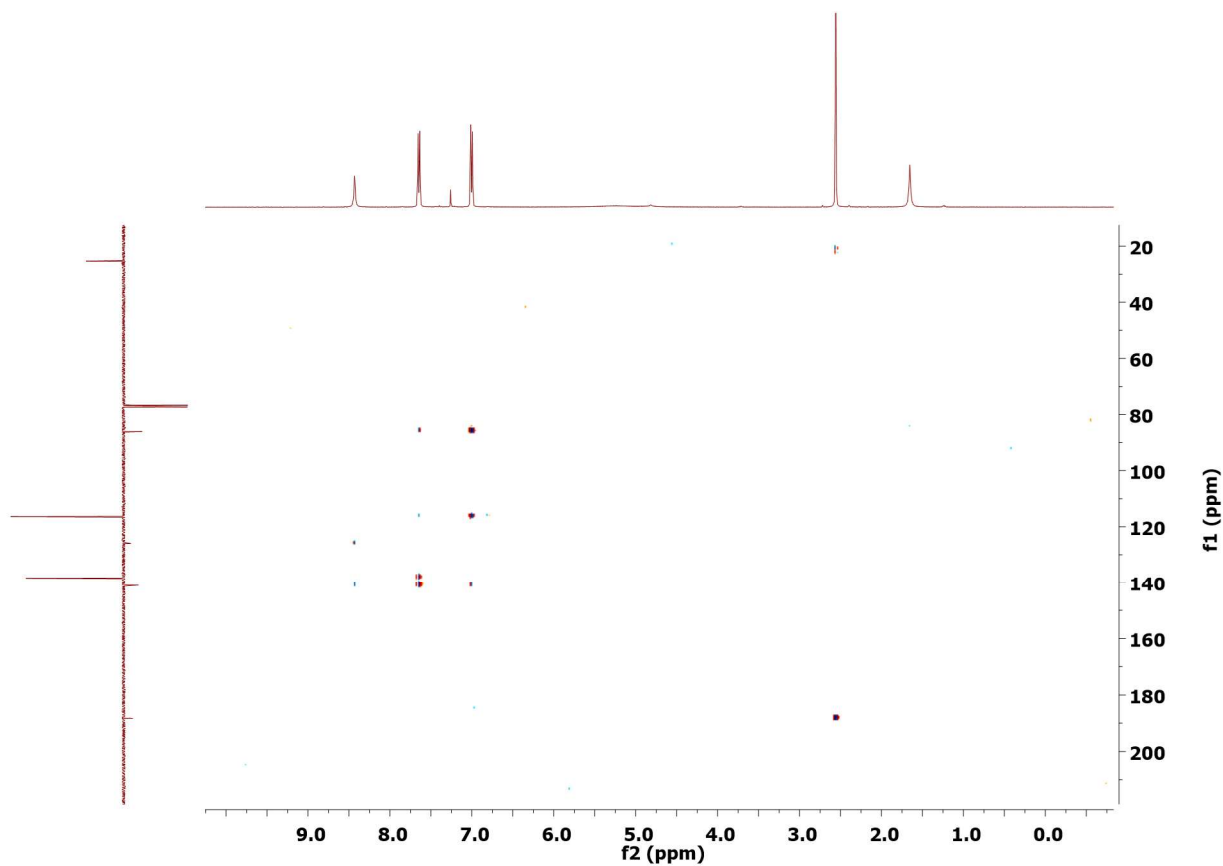

IR spectrum of (Z)-N-(4-iodophenyl)-2-oxopropanehydrazonoyl chloride

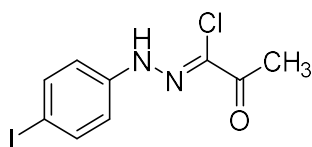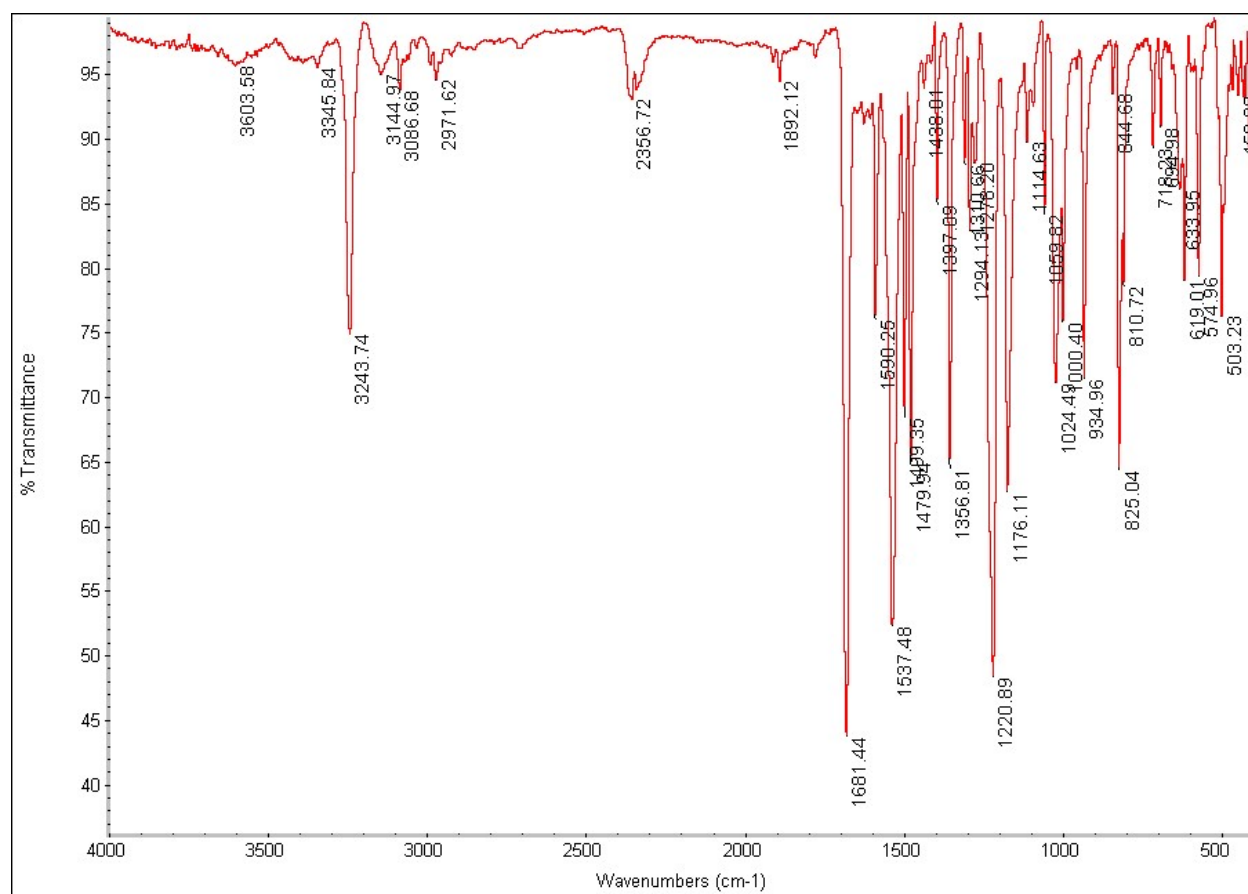

$^1\text{H}$  NMR ( $\text{CDCl}_3$ ) spectrum of (Z)-N-(4-(methylthio)phenyl)-2-oxopropanehydrazonoyl chloride (**29f**)

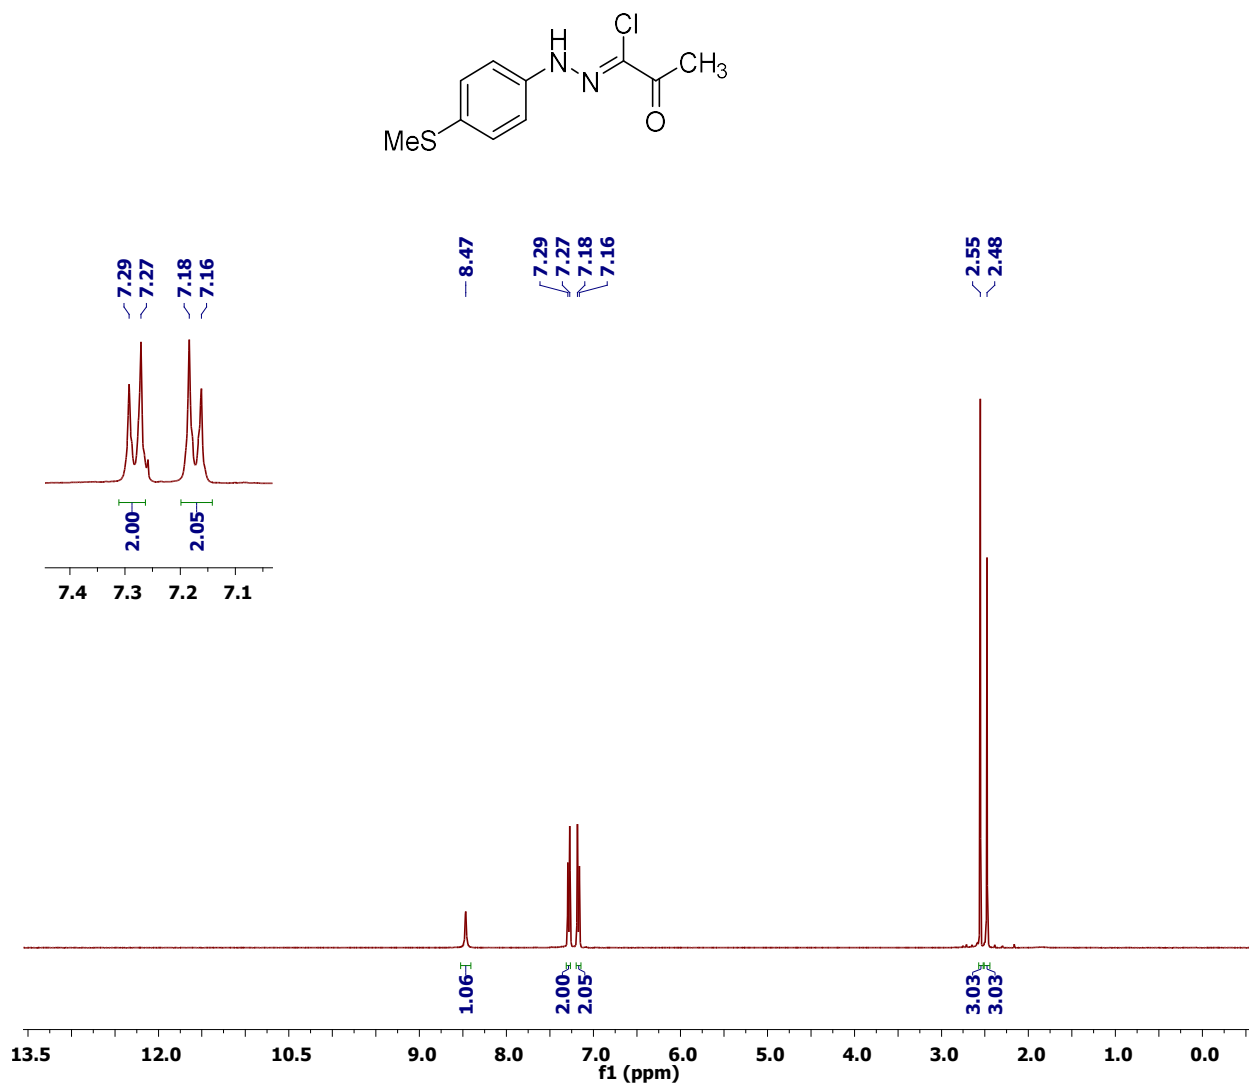

$^{13}\text{C}$  NMR ( $\text{CDCl}_3$ ) spectrum of (Z)-N-(4-(methylthio)phenyl)-2-oxopropanehydrazonoyl chloride

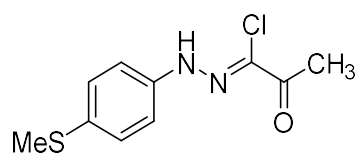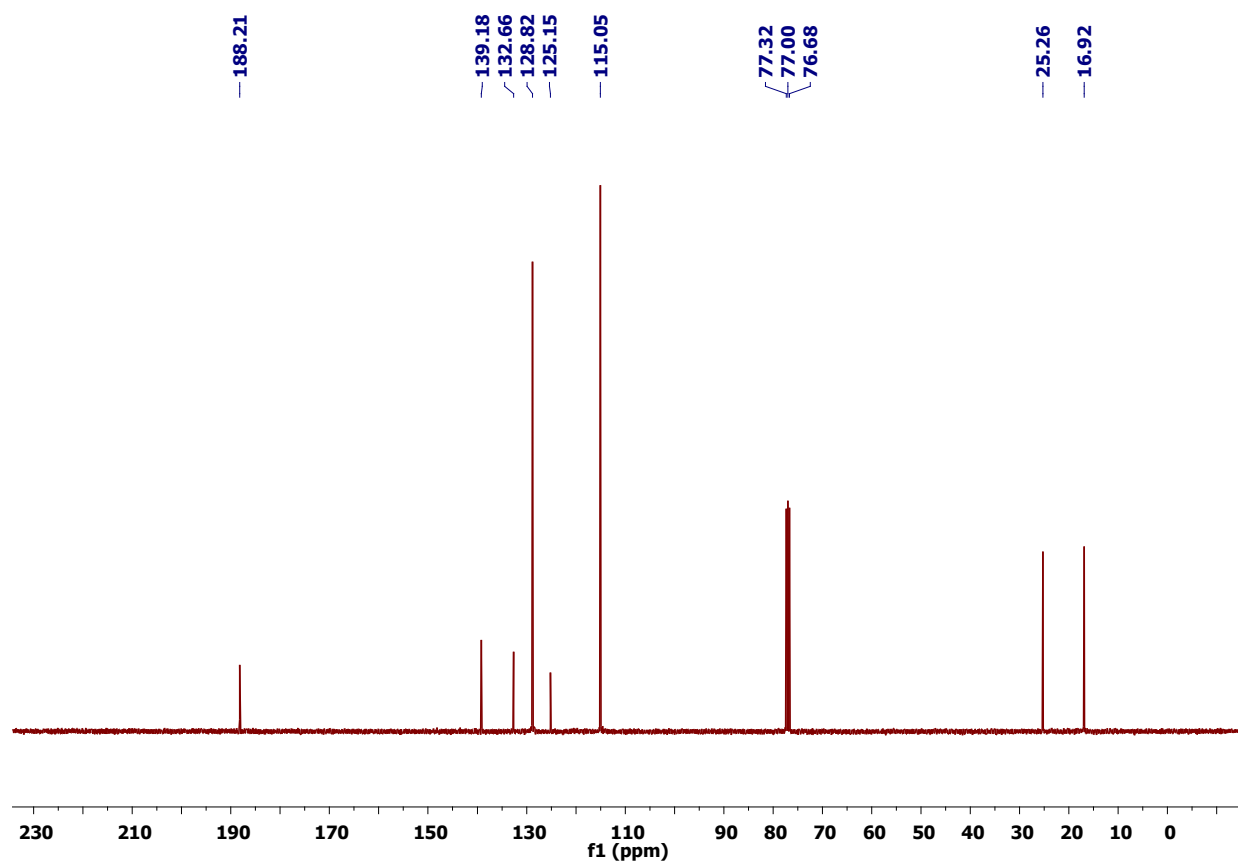

$^{13}\text{C}$  CRAPT NMR ( $\text{CDCl}_3$ ) spectrum of (Z)-N-(4-(methylthio)phenyl)-2-oxopropanehydrazonoyl chloride

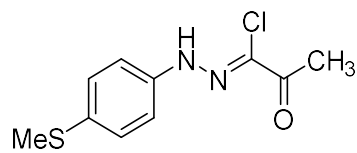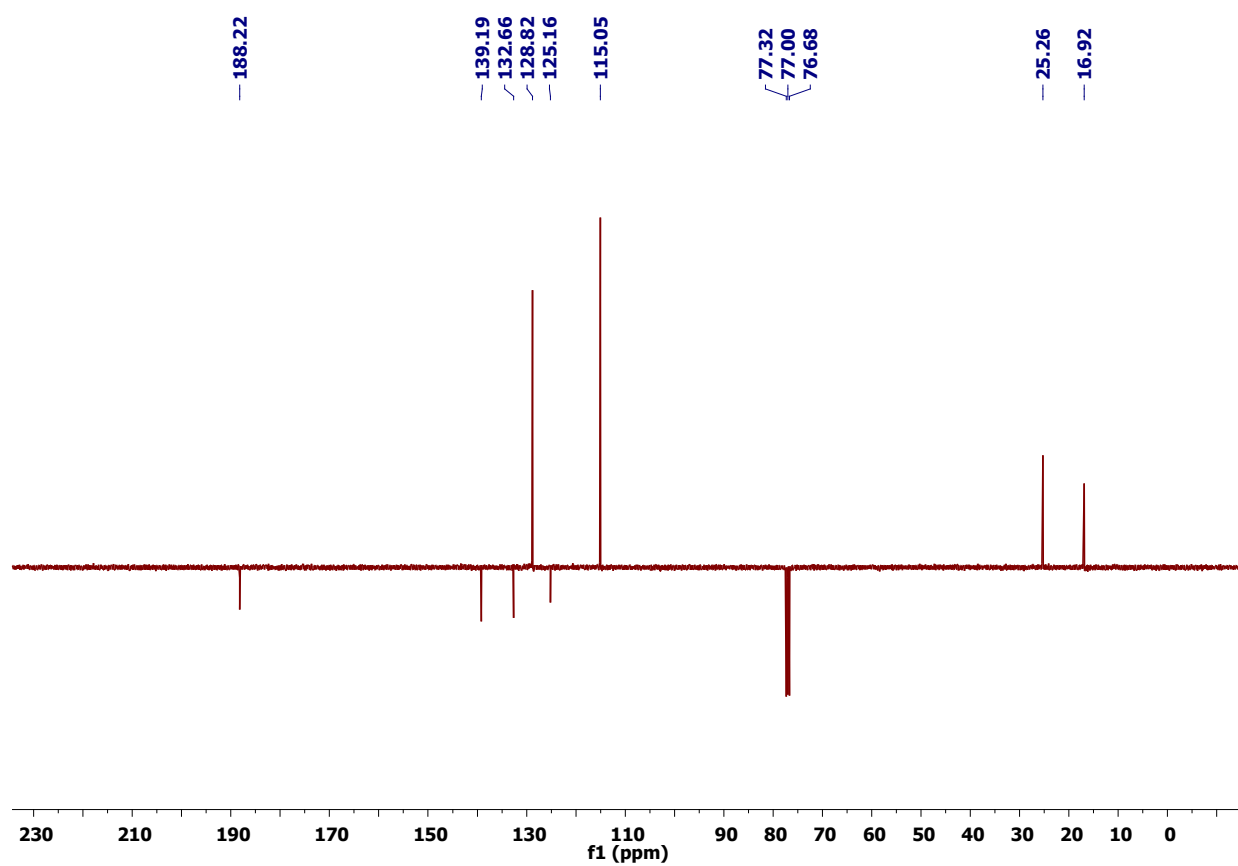



$^1\text{H}$ - $^1\text{H}$ -gDQCOSY NMR ( $\text{CDCl}_3$ ) spectrum of (Z)-N-(4-(methylthio)phenyl)-2-oxopropanehydrazonoyl chloride

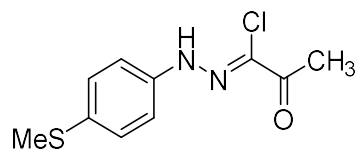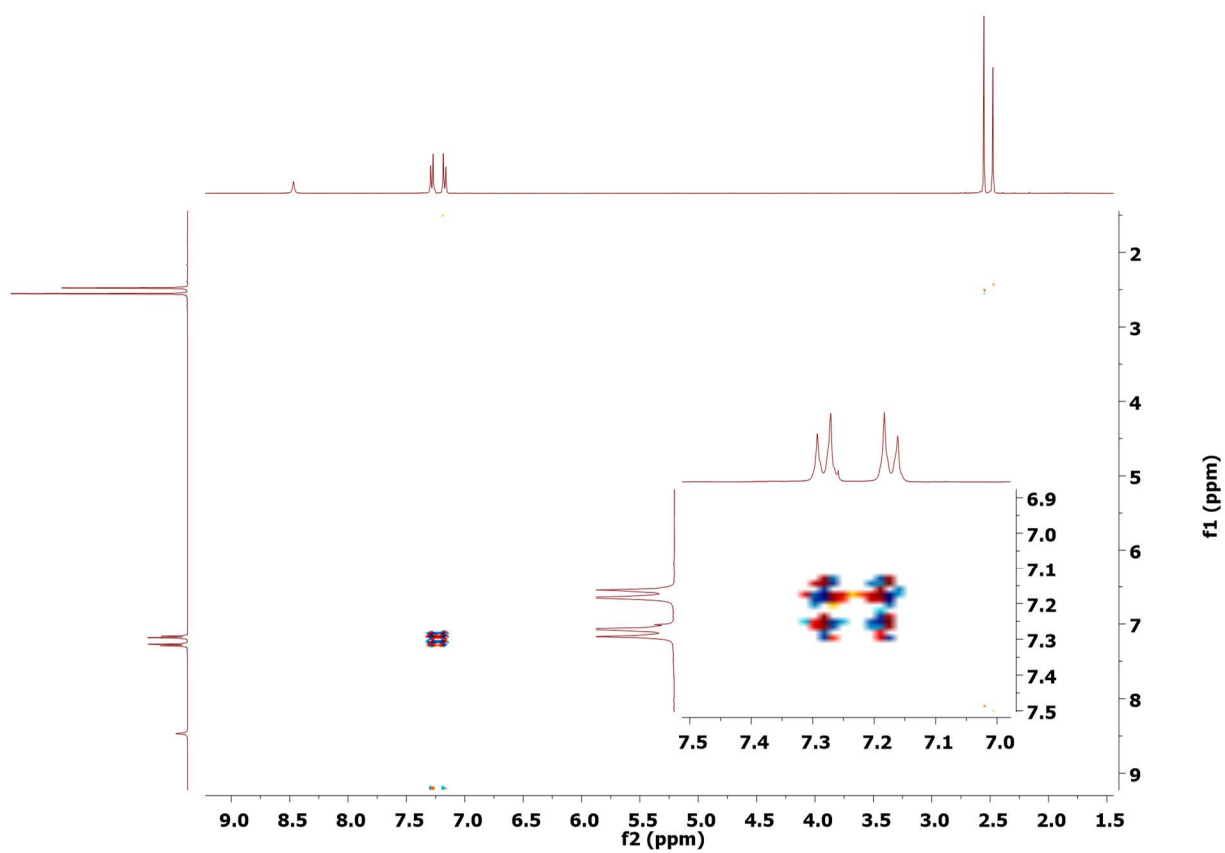

$^1\text{H}$ - $^{13}\text{C}$ -HSQC NMR ( $\text{CDCl}_3$ ) spectrum of (Z)-N-(4-(methylthio)phenyl)-2-oxopropanhydrazonoyl chloride

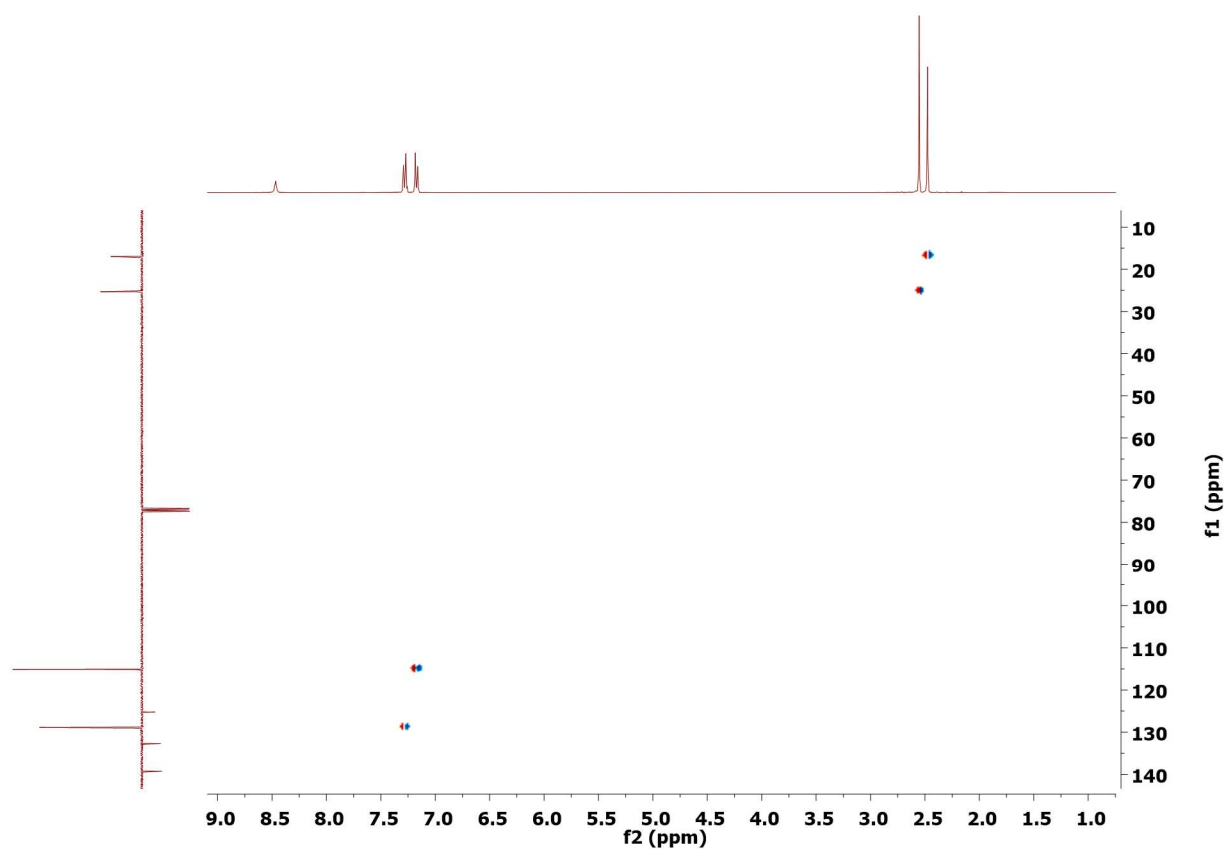

$^1\text{H}$ - $^{13}\text{C}$ -gHMBC NMR ( $\text{CDCl}_3$ ) spectrum of (Z)-N-(4-(methylthio)phenyl)-2-oxopropanhydrazonoyl chloride

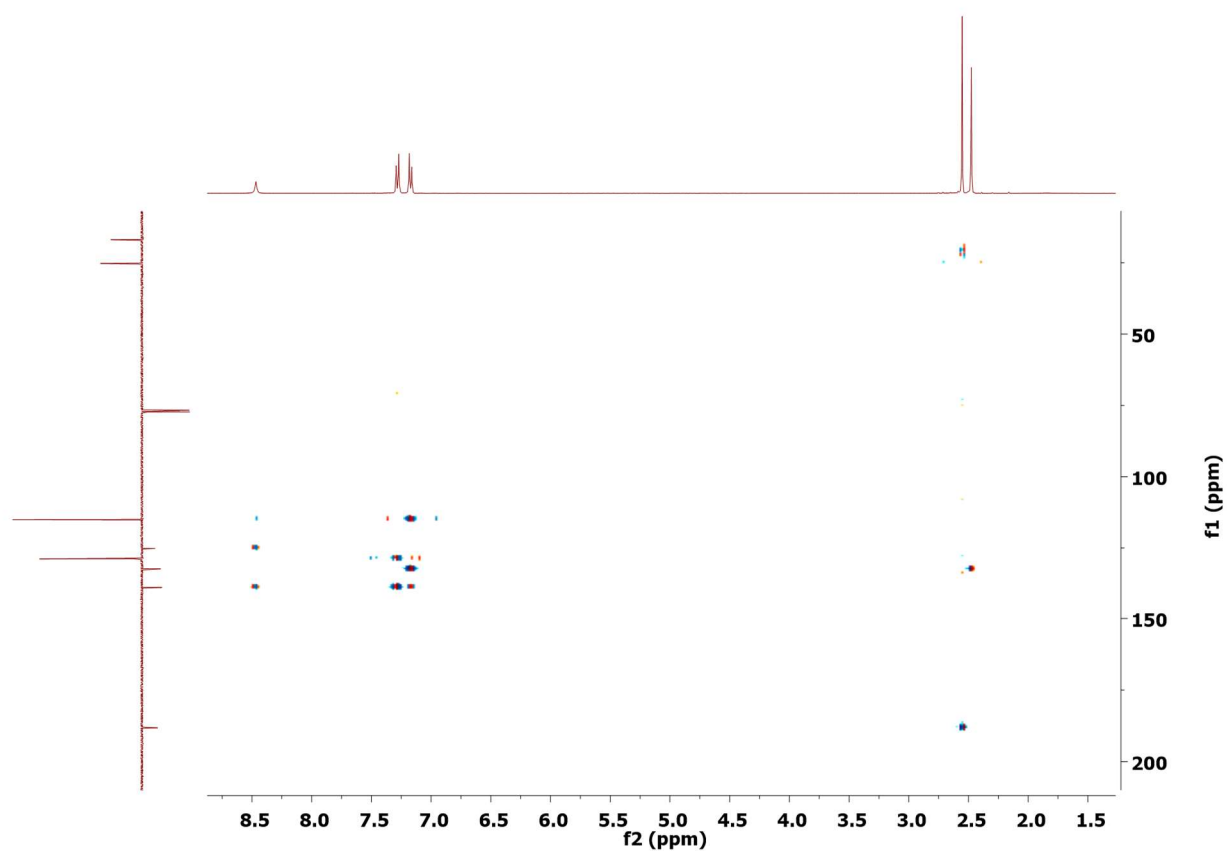

IR spectrum of (Z)-N-(4-(methylthio)phenyl)-2-oxopropanehydrazonoyl chloride

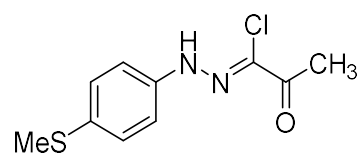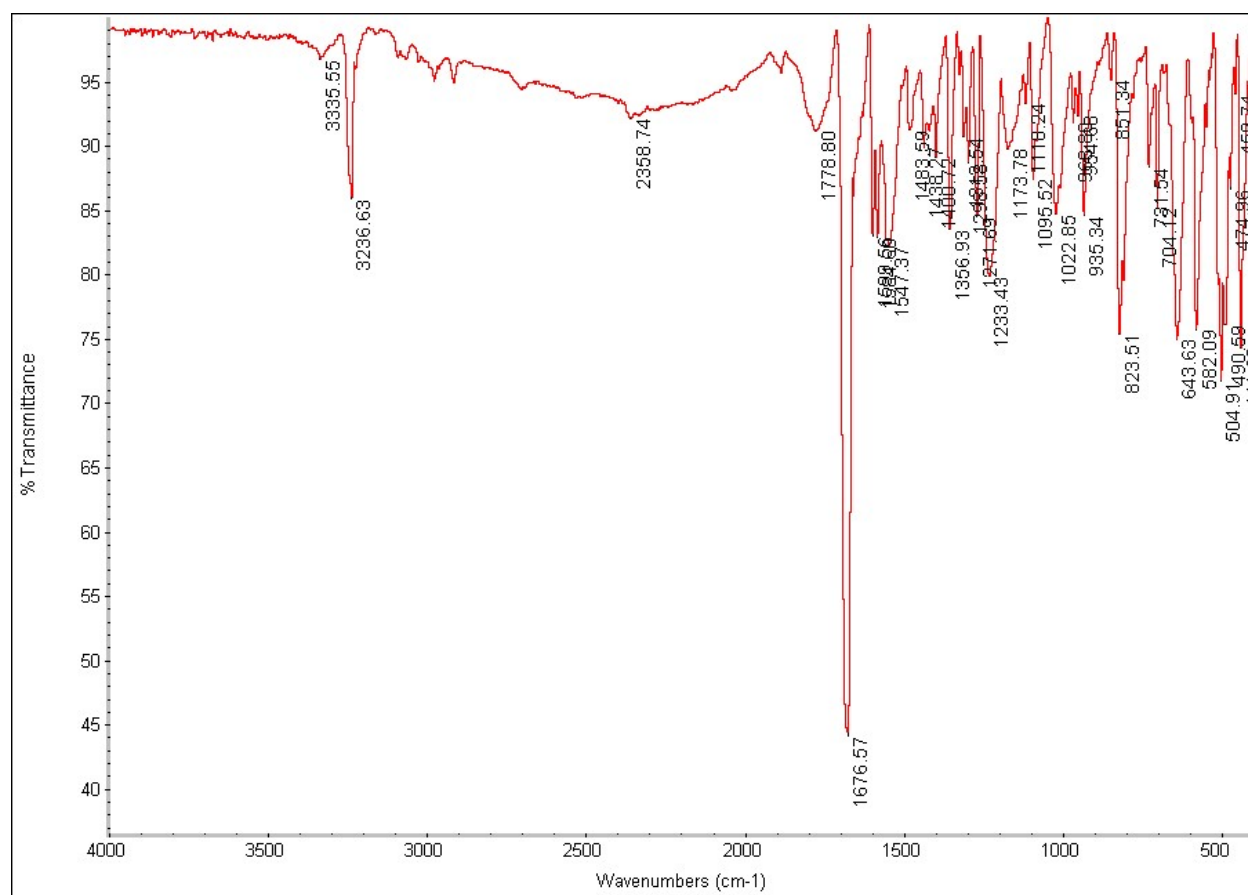

$^1\text{H}$  NMR ( $\text{CDCl}_3$ ) spectrum of (Z)-2-oxo-N-(m-tolyl)propanehydrazonoyl chloride (**29g**)

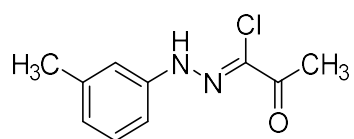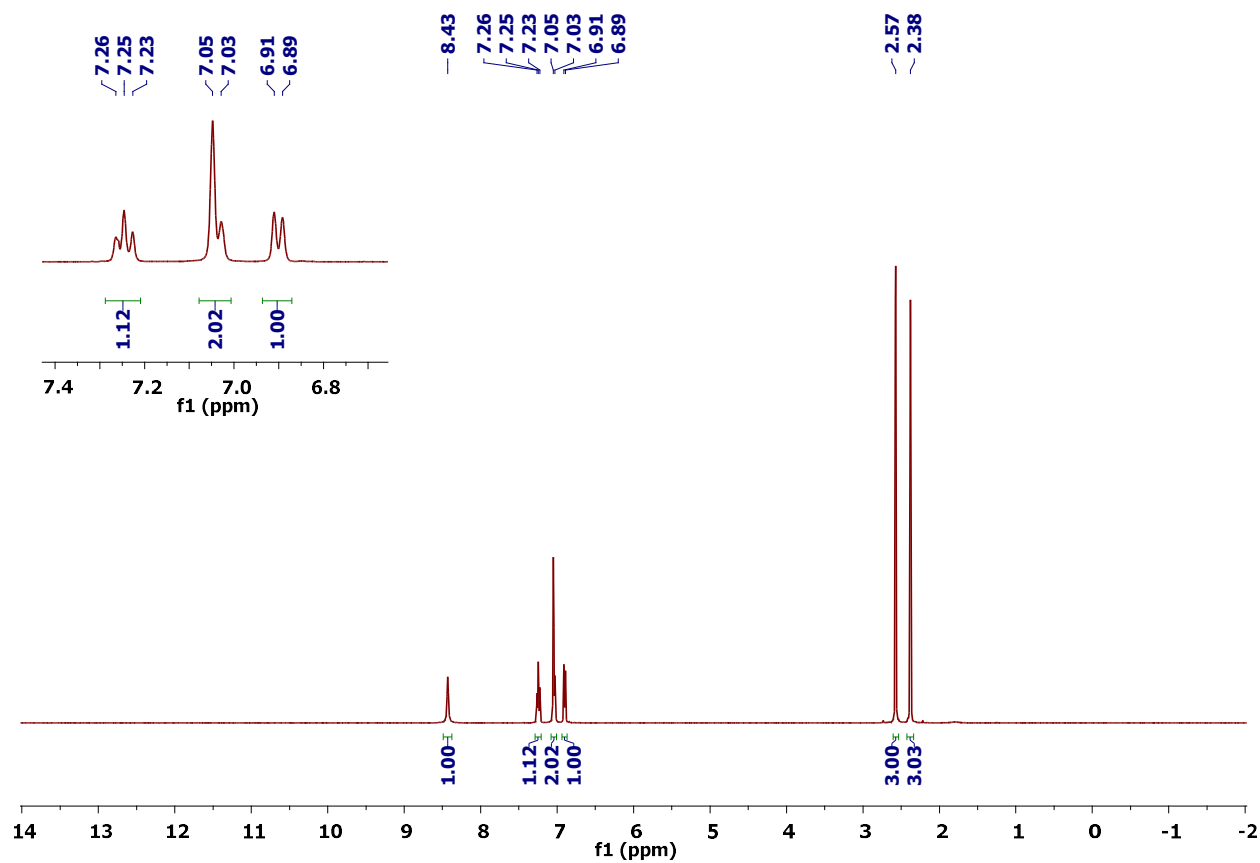

$^{13}\text{C}$  NMR ( $\text{CDCl}_3$ ) spectrum of (Z)-2-oxo-N-(m-tolyl)propanehydrazonoyl chloride

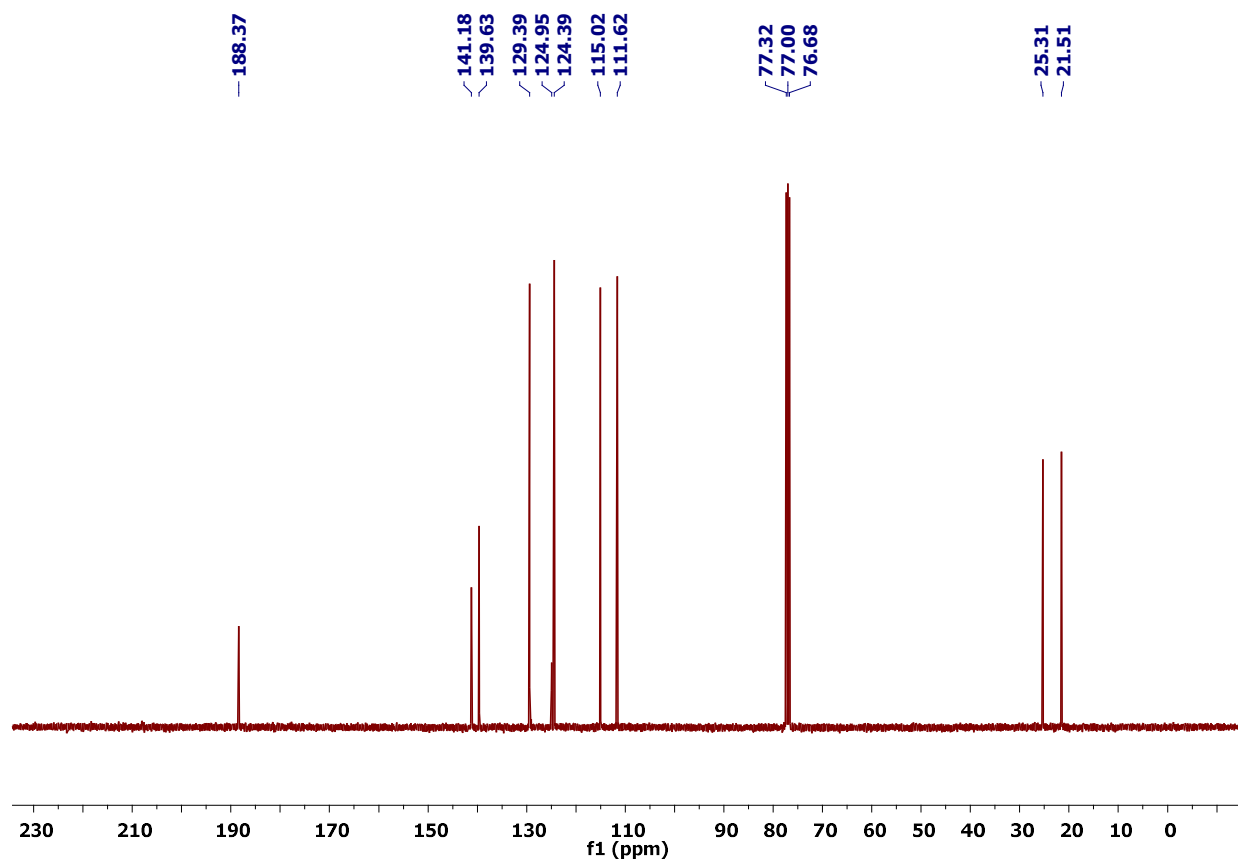

$^{13}\text{C}$  CRAPT NMR ( $\text{CDCl}_3$ ) spectrum of (Z)-2-oxo-N-(m-tolyl)propanehydrazonoyl chloride

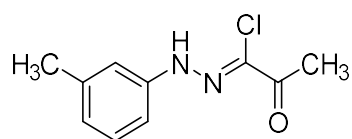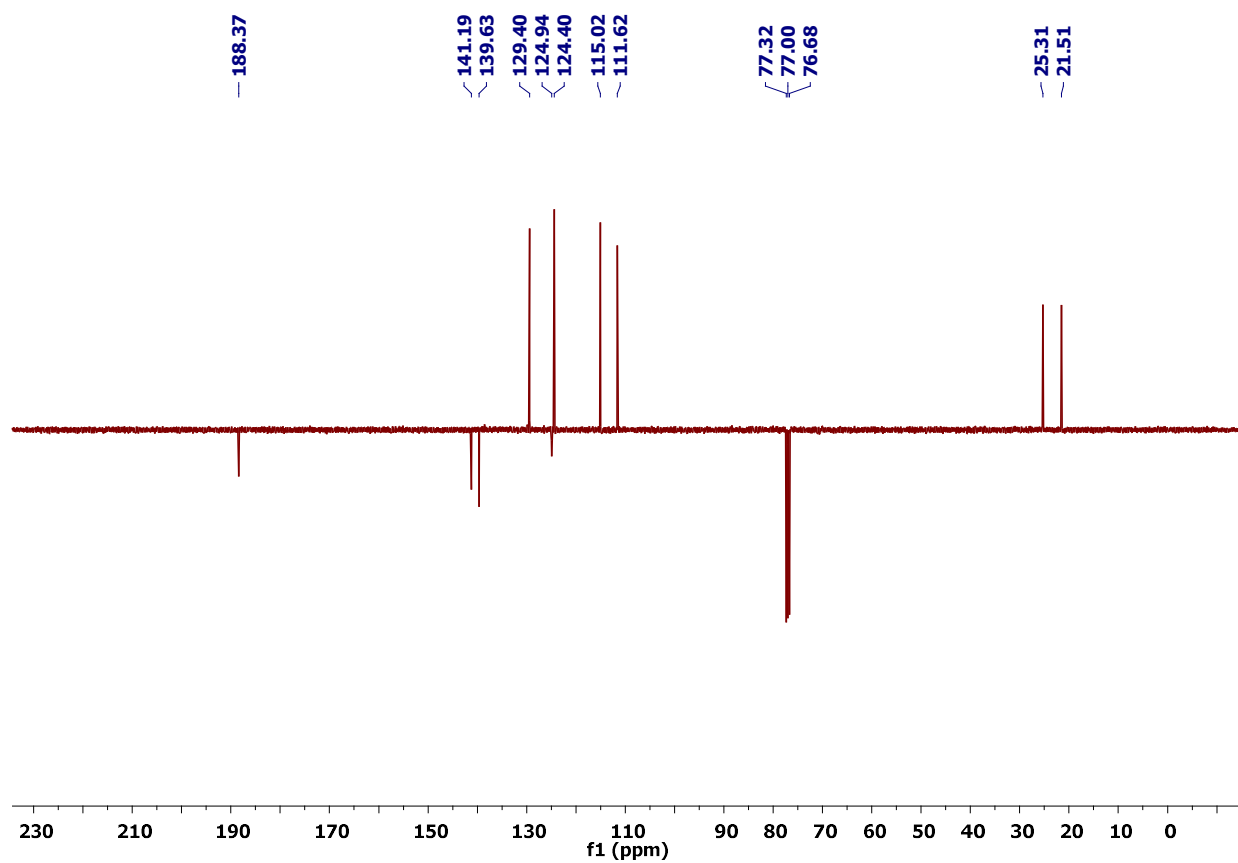

$^1\text{H}$ - $^1\text{H}$ -gDQCOSY NMR ( $\text{CDCl}_3$ ) spectrum of (Z)-2-oxo-N-(m-tolyl)propanehydrazonoyl chloride

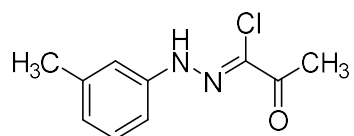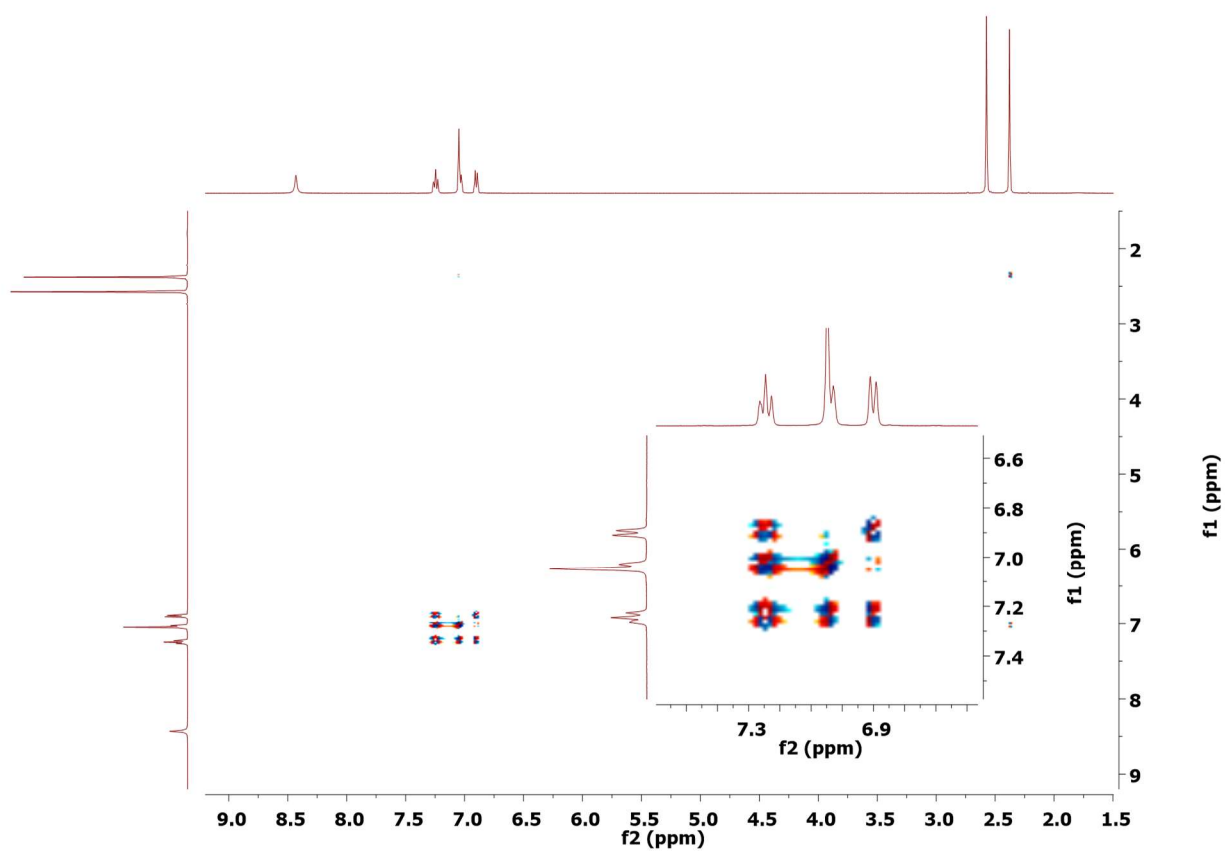



$^1\text{H}$ - $^{13}\text{C}$ -HSQC NMR ( $\text{CDCl}_3$ ) spectrum of (Z)-2-oxo-N-(m-tolyl)propanehydrazonoyl chloride

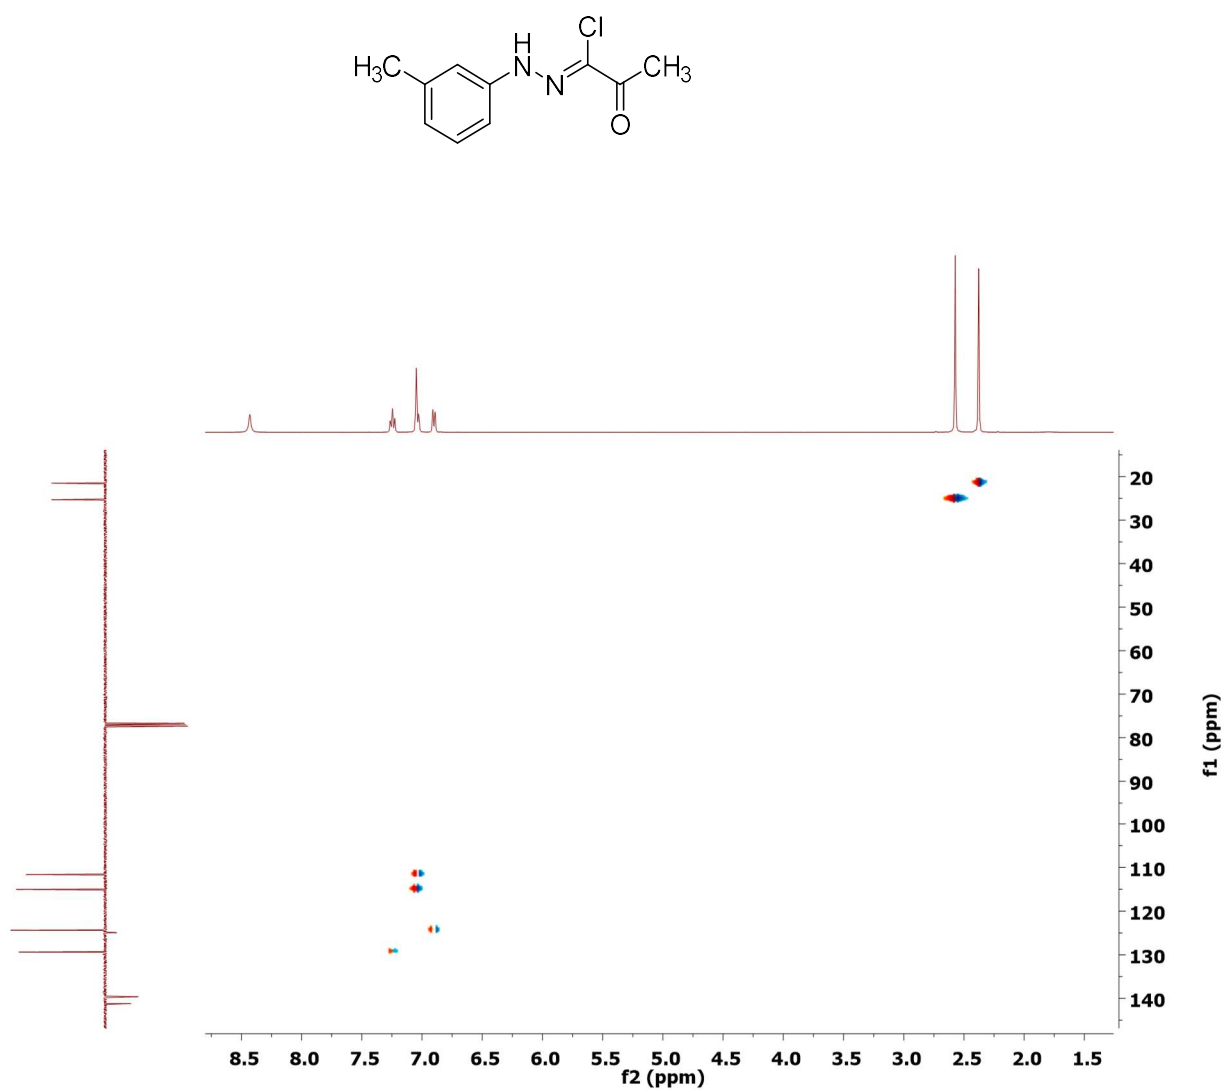

$^1\text{H}$ - $^{13}\text{C}$ -gHMBC NMR ( $\text{CDCl}_3$ ) spectrum of (Z)-2-oxo-N-(m-tolyl)propanehydrazonoyl chloride

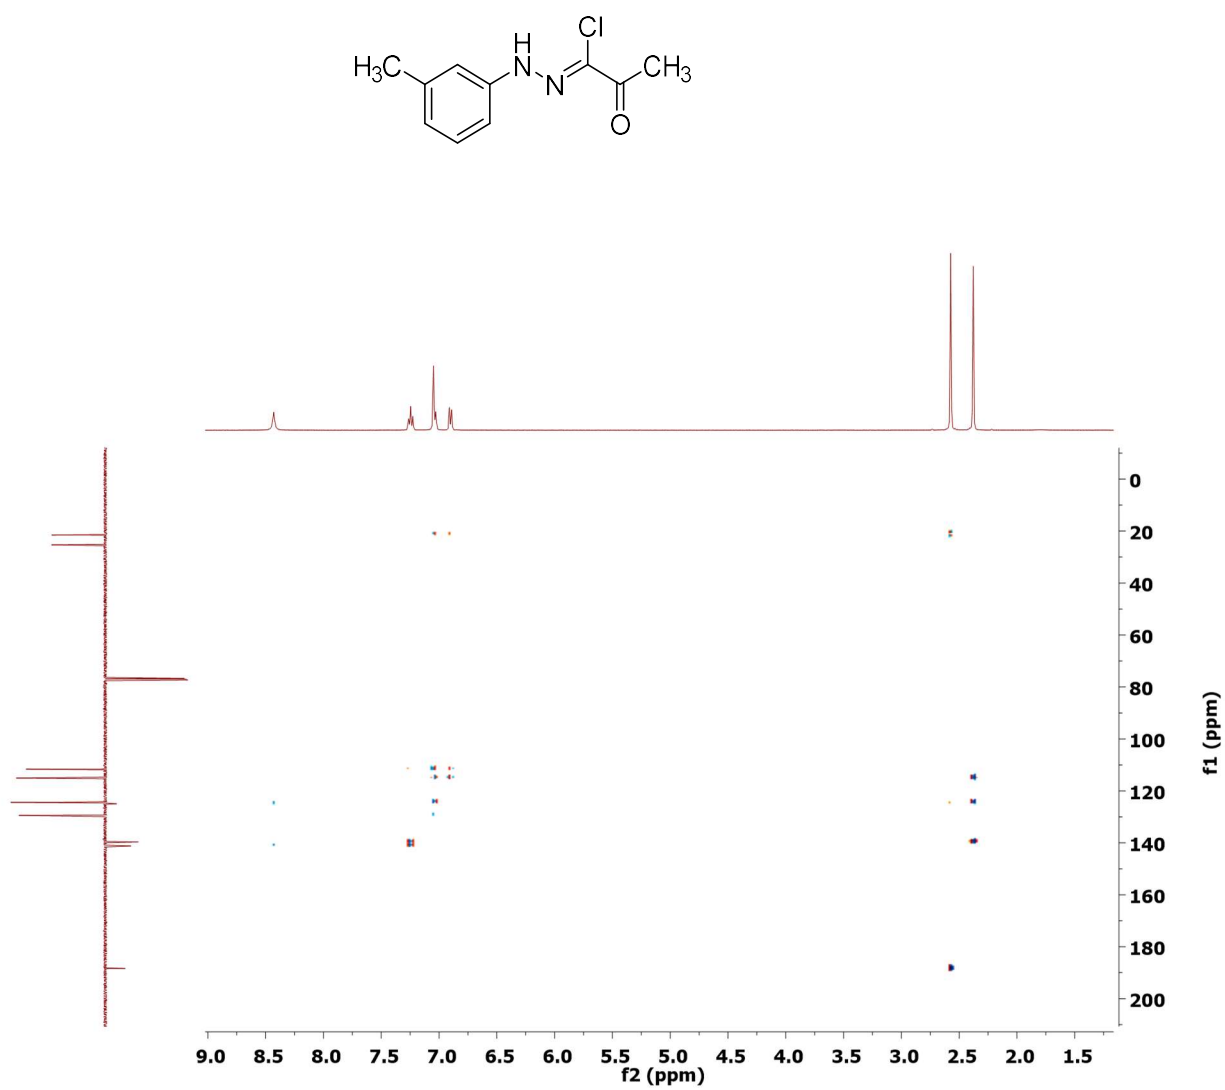

IR spectrum of (Z)-2-oxo-N-(m-tolyl)propanehydrazonoyl chloride

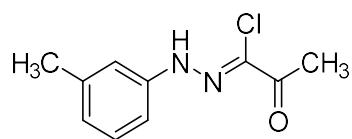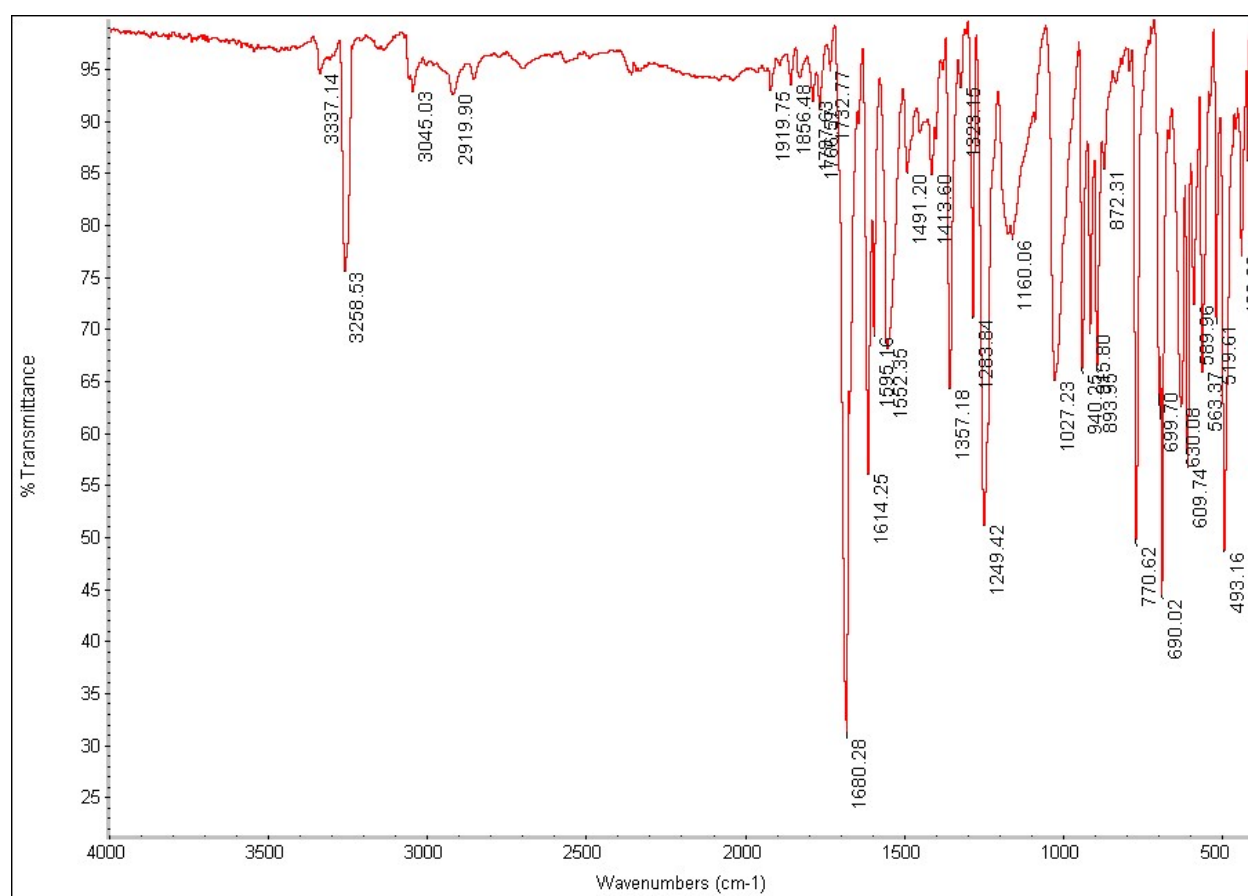

$^1\text{H}$  NMR ( $\text{CDCl}_3$ ) spectrum of (Z)-2-oxo-N-(3-(trifluoromethyl)phenyl)propanehydrazonoyl chloride (**29h**)

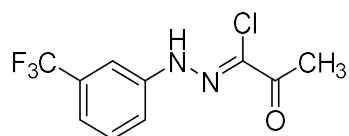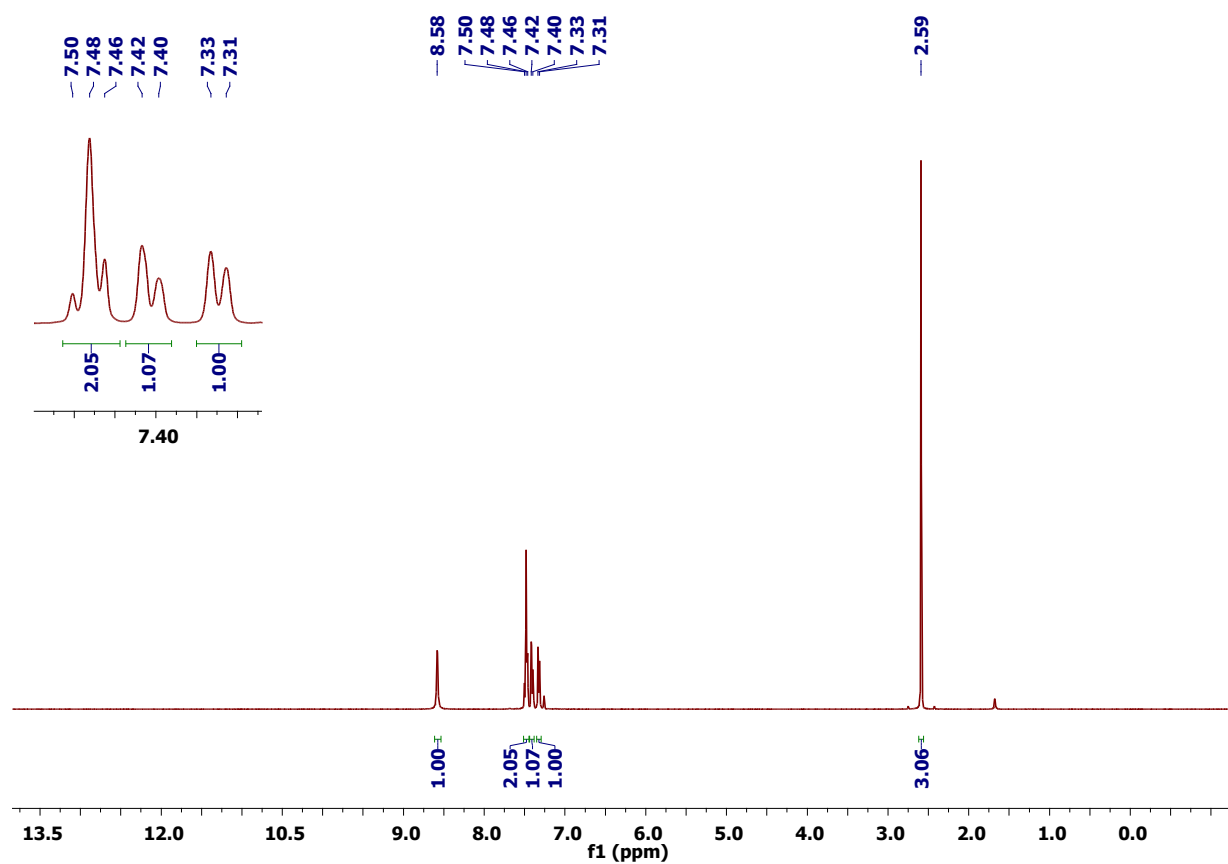

$^{13}\text{C}$  NMR ( $\text{CDCl}_3$ ) spectrum of (Z)-2-oxo-N-(3-(trifluoromethyl)phenyl)propanehydrazonoyl chloride

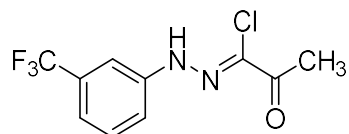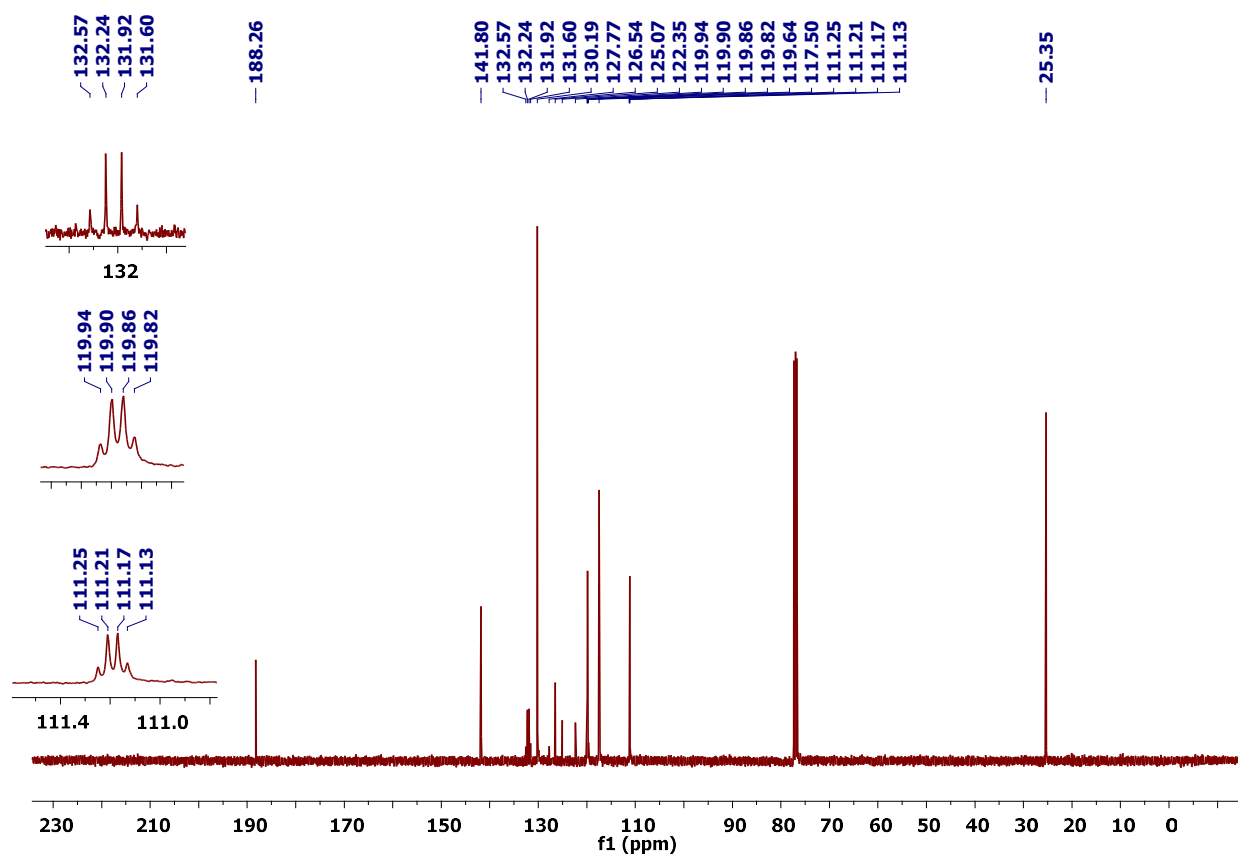

$^{13}\text{C}$  CRAPT NMR ( $\text{CDCl}_3$ ) spectrum of (Z)-2-oxo-N-(3-(trifluoromethyl)phenyl)propanehydrazonoyl chloride

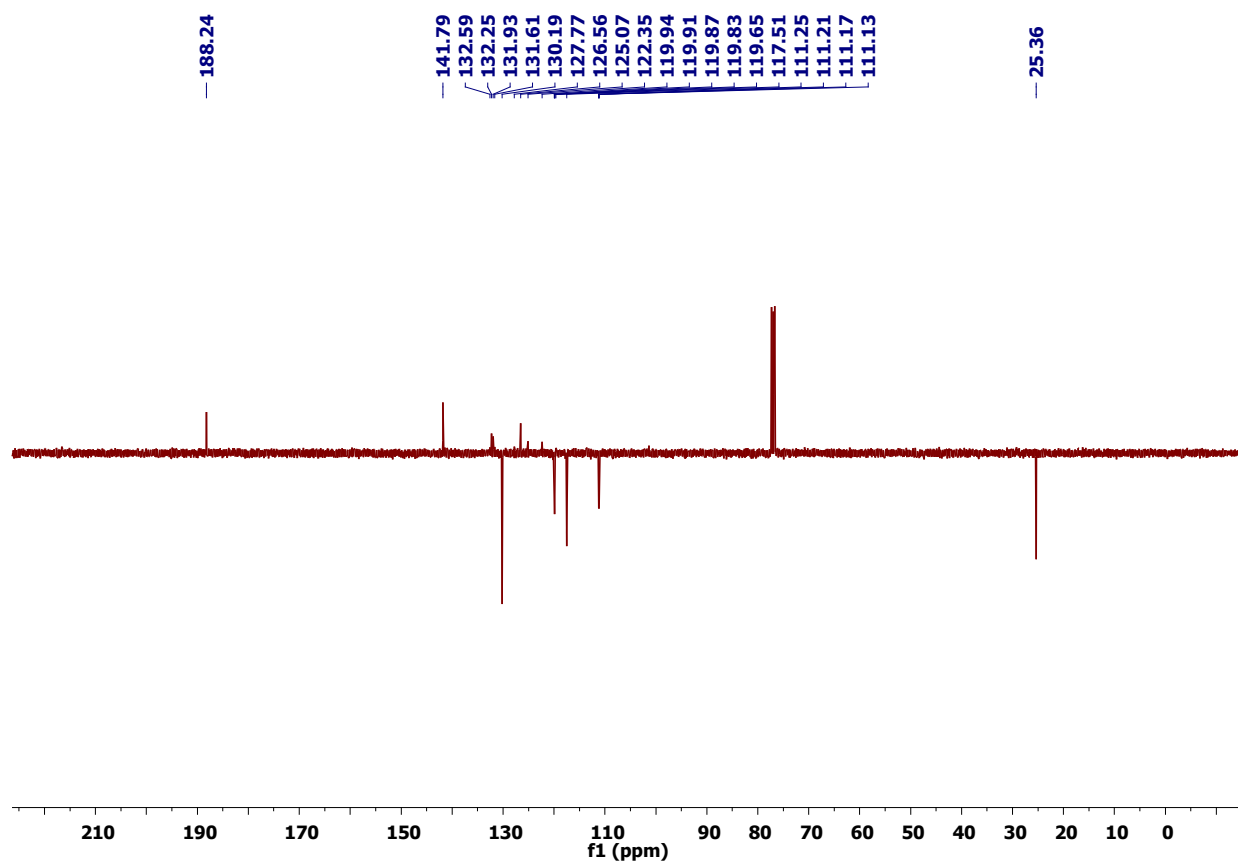

$^1\text{H}$ - $^1\text{H}$ -gDQCOSY NMR ( $\text{CDCl}_3$ ) spectrum of (Z)-2-oxo-N-(3-(trifluoromethyl)phenyl)propanehydrazonoyl chloride

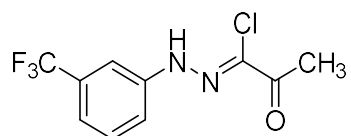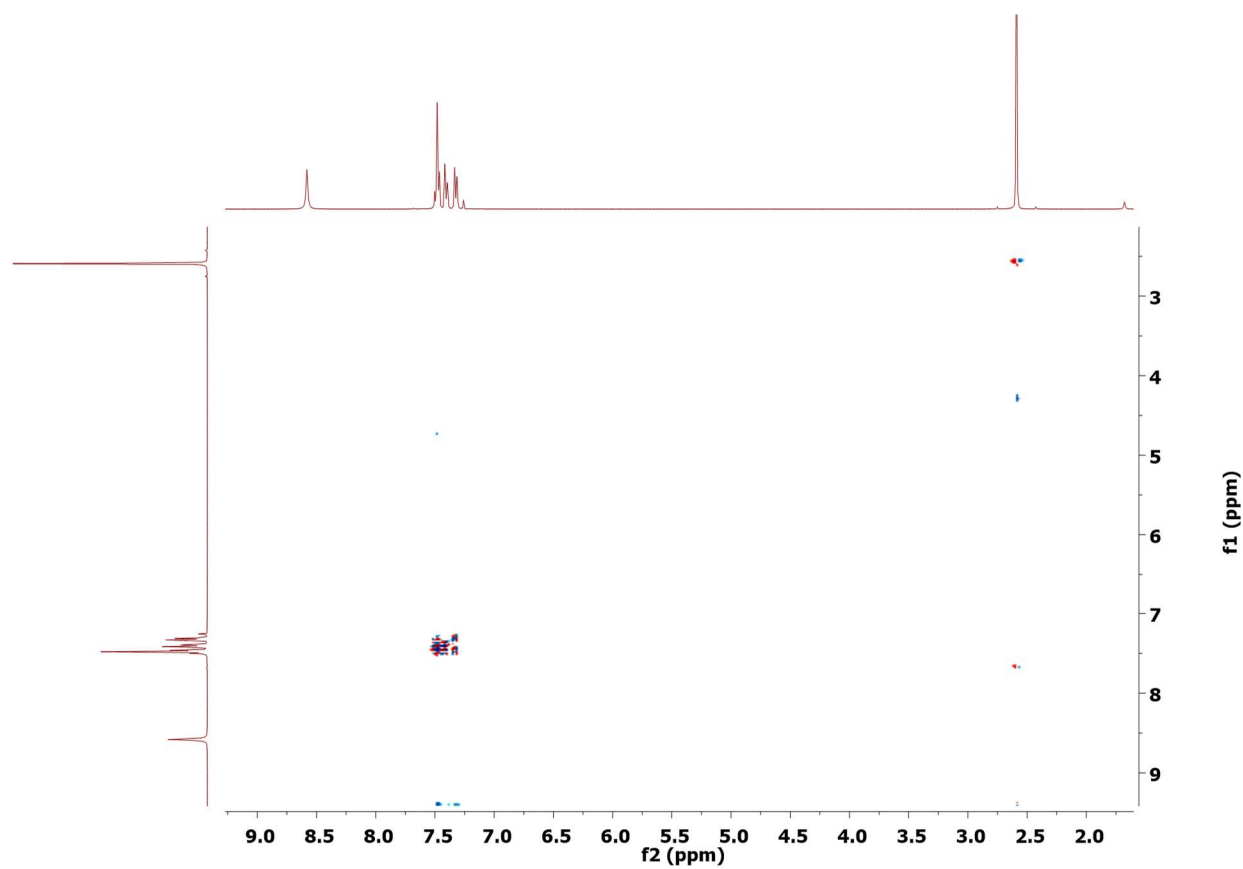

$^1\text{H}$ - $^{13}\text{C}$ -HSQC NMR ( $\text{CDCl}_3$ ) spectrum of (Z)-2-oxo-N-(3-(trifluoromethyl)phenyl)propanehydrazonoyl chloride

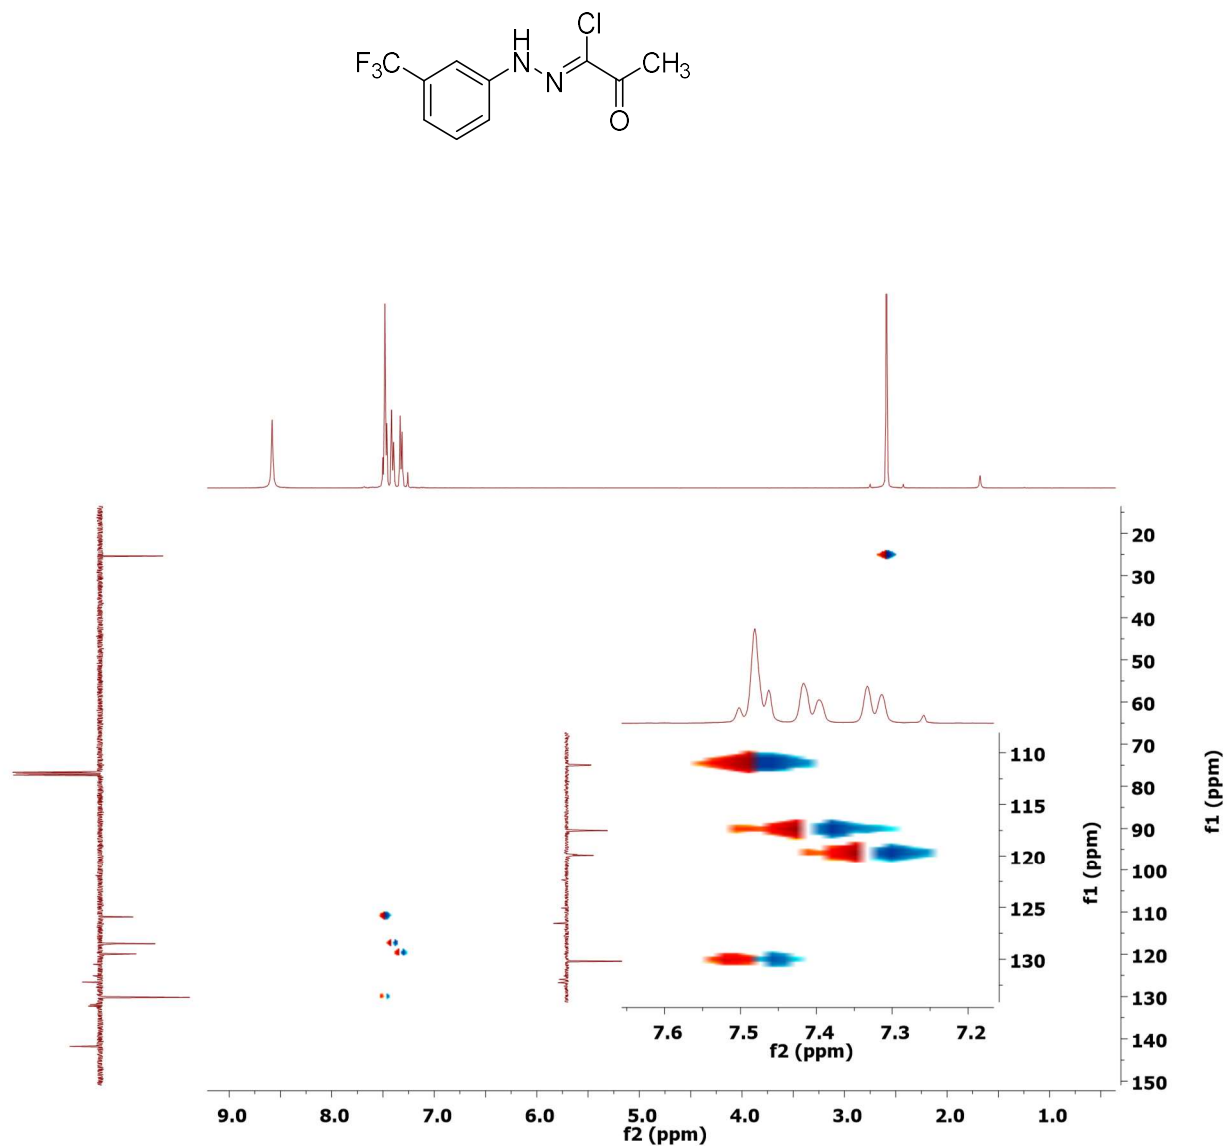



$^1\text{H}$ - $^{13}\text{C}$ -gHMBC NMR ( $\text{CDCl}_3$ ) spectrum of (Z)-2-oxo-N-(3-(trifluoromethyl)phenyl)propanehydrazonoyl chloride

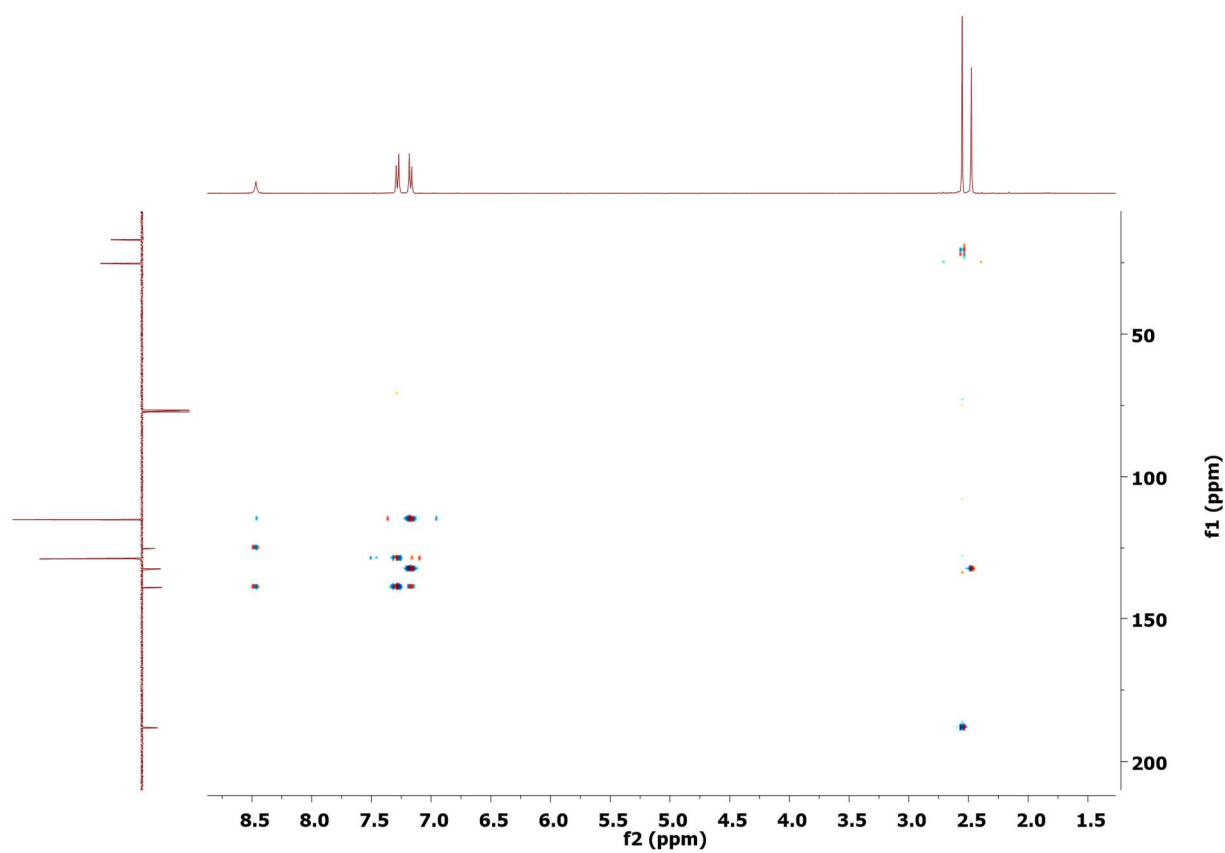

IR spectrum of (Z)-2-oxo-N-(3-(trifluoromethyl)phenyl)propanehydrazonoyl chloride

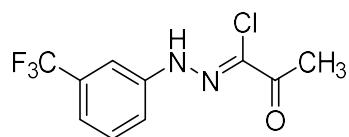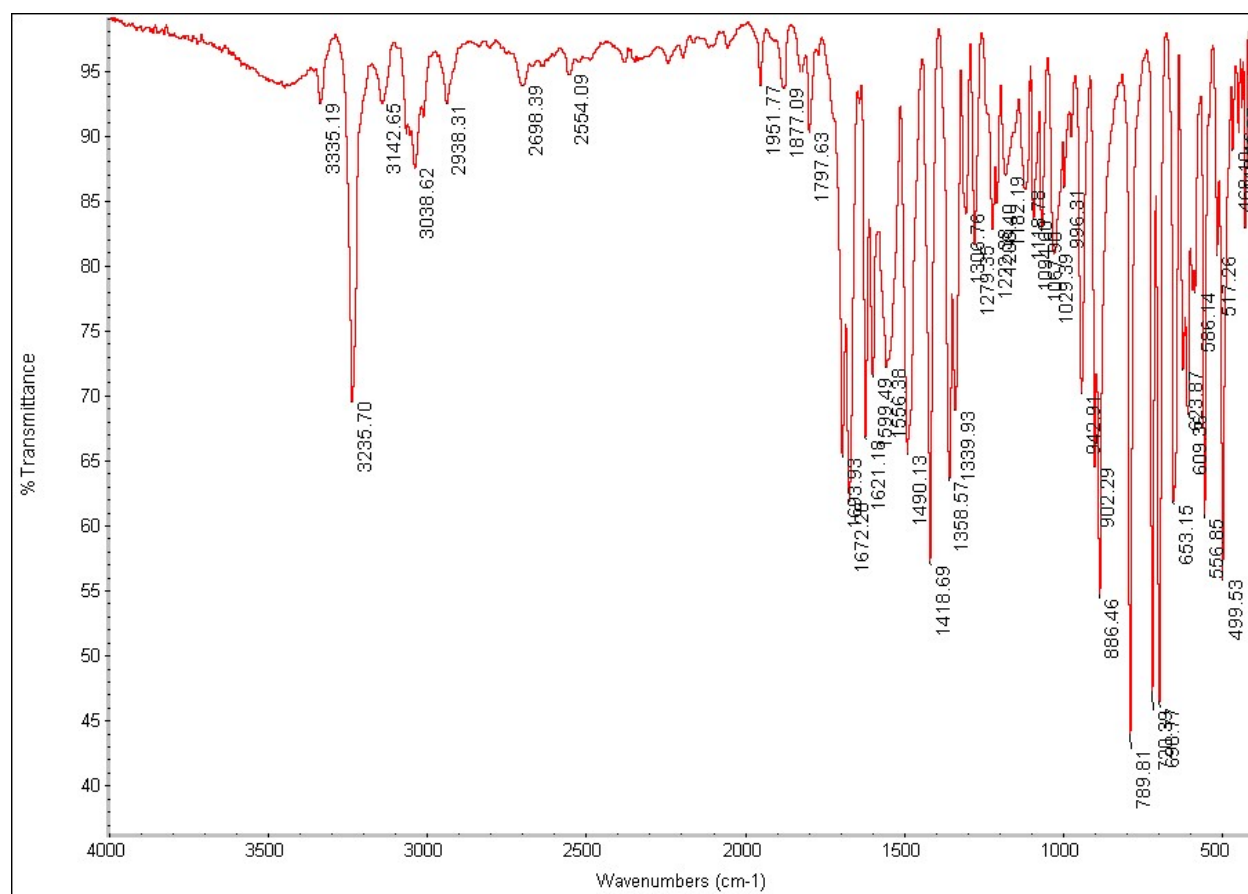

$^1\text{H}$  NMR ( $\text{CDCl}_3$ ) spectrum of (Z)-N-(4-methoxyphenyl)-2-oxopropanehydrazonoyl chloride (**29i**)

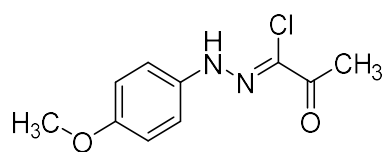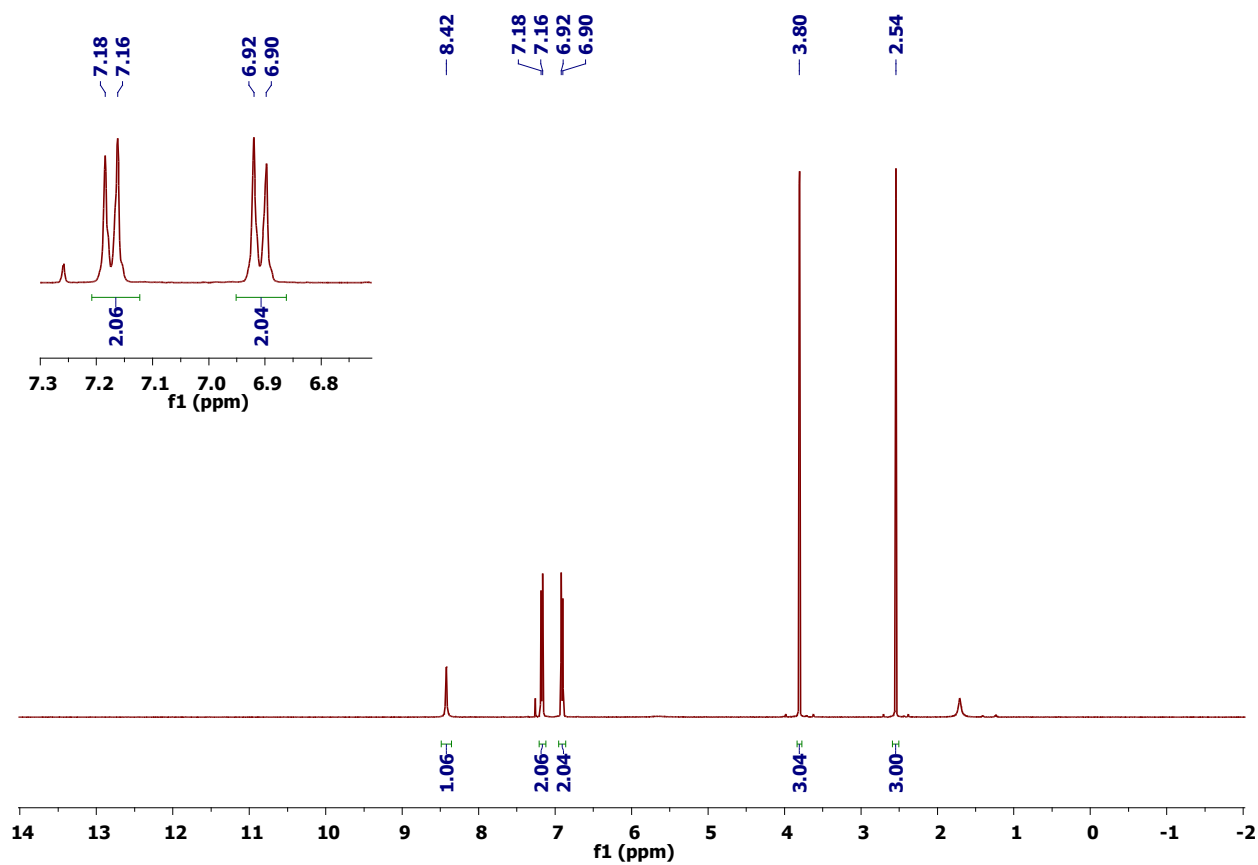

$^{13}\text{C}$  NMR ( $\text{CDCl}_3$ ) spectrum of (Z)-N-(4-methoxyphenyl)-2-oxopropanehydrazonoyl chloride

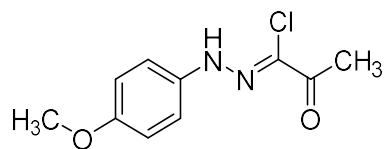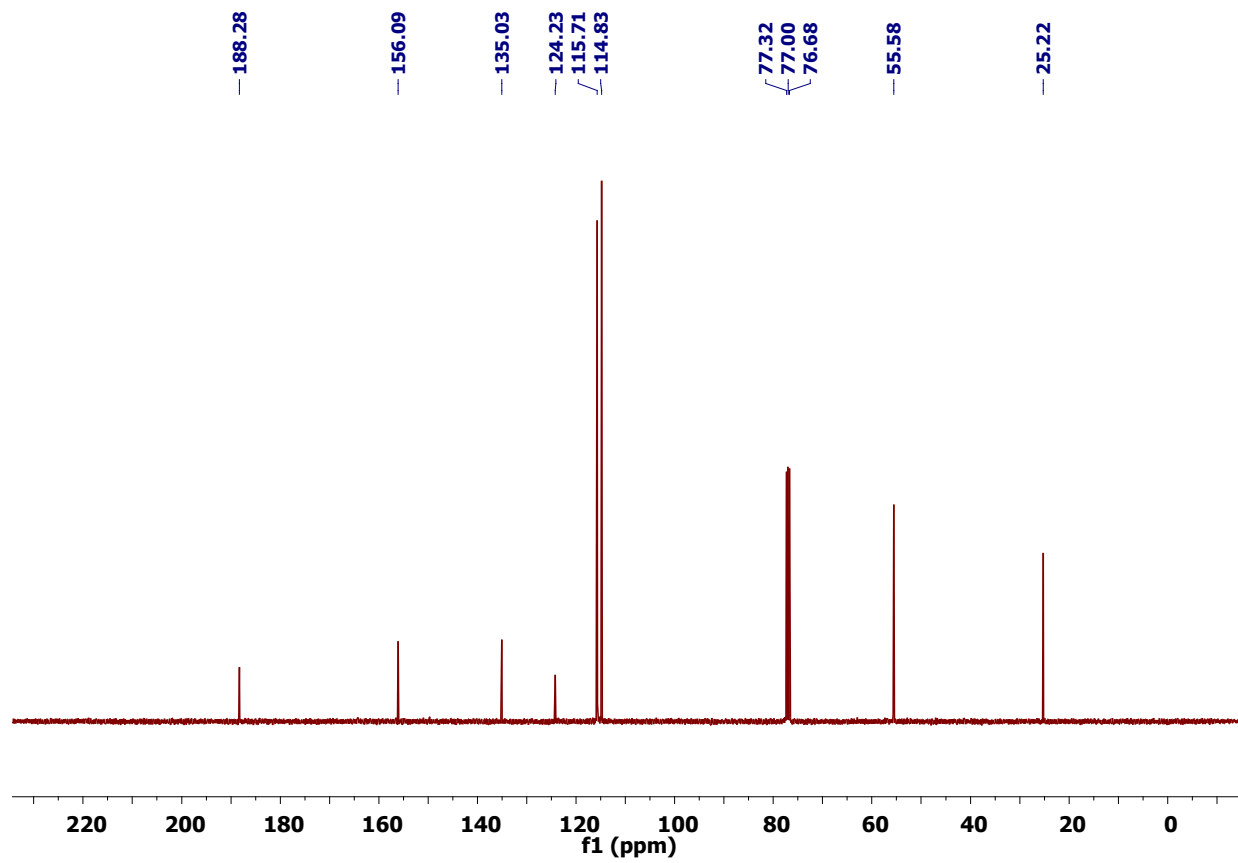

$^{13}\text{C}$  CRAPT NMR ( $\text{CDCl}_3$ ) spectrum of (Z)-N-(4-methoxyphenyl)-2-oxopropanehydrazonoyl chloride

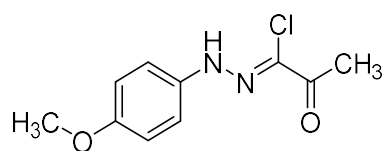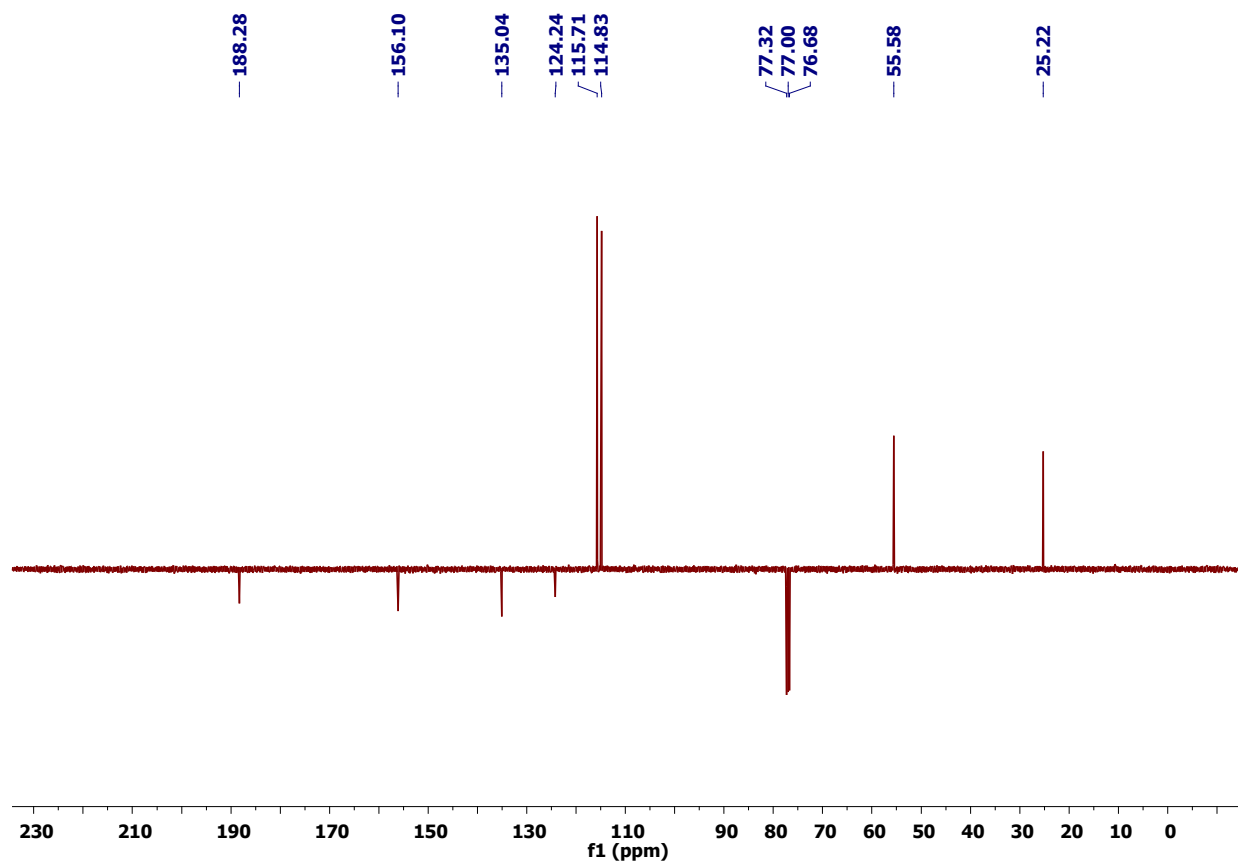

$^1\text{H}$ - $^1\text{H}$ -gDQCOSY NMR ( $\text{CDCl}_3$ ) spectrum of (Z)-N-(4-methoxyphenyl)-2-oxopropanehydrazonoyl chloride

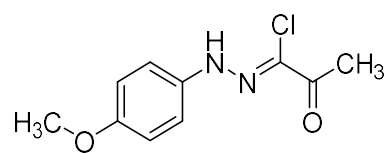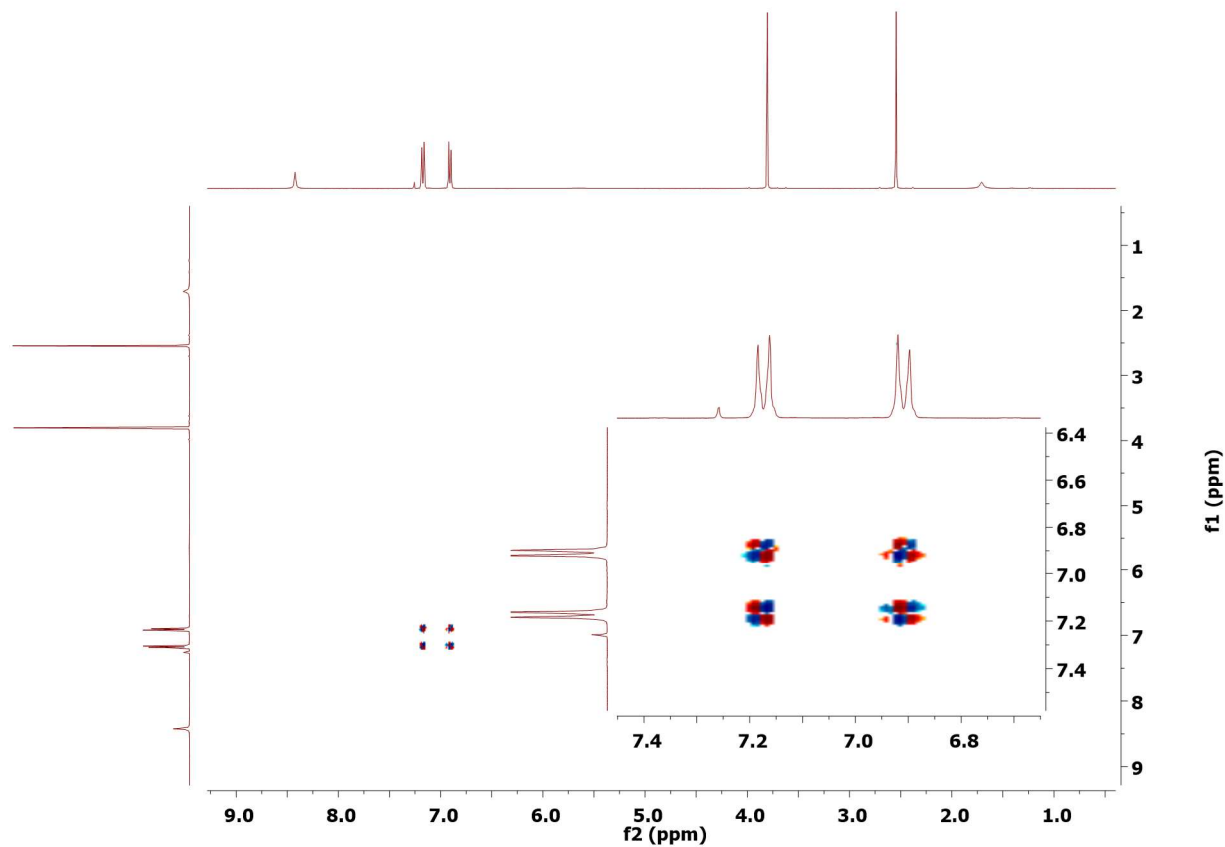

$^1\text{H}$ - $^{13}\text{C}$ -HSQC NMR ( $\text{CDCl}_3$ ) spectrum of (Z)-N-(4-methoxyphenyl)-2-oxopropanehydrazonoyl chloride

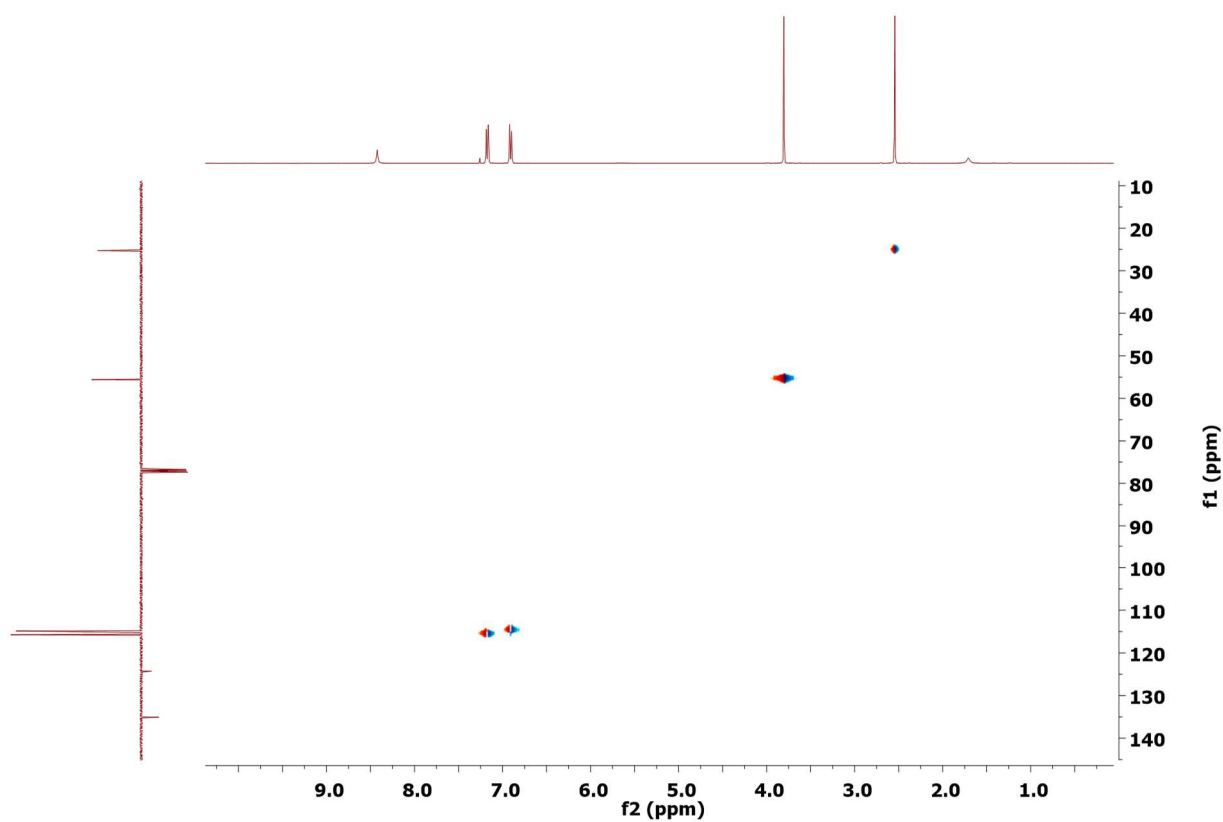

$^1\text{H}$ - $^{13}\text{C}$ -gHMBC NMR ( $\text{CDCl}_3$ ) spectrum of (Z)-N-(4-methoxyphenyl)-2-oxopropanehydrazonoyl chloride

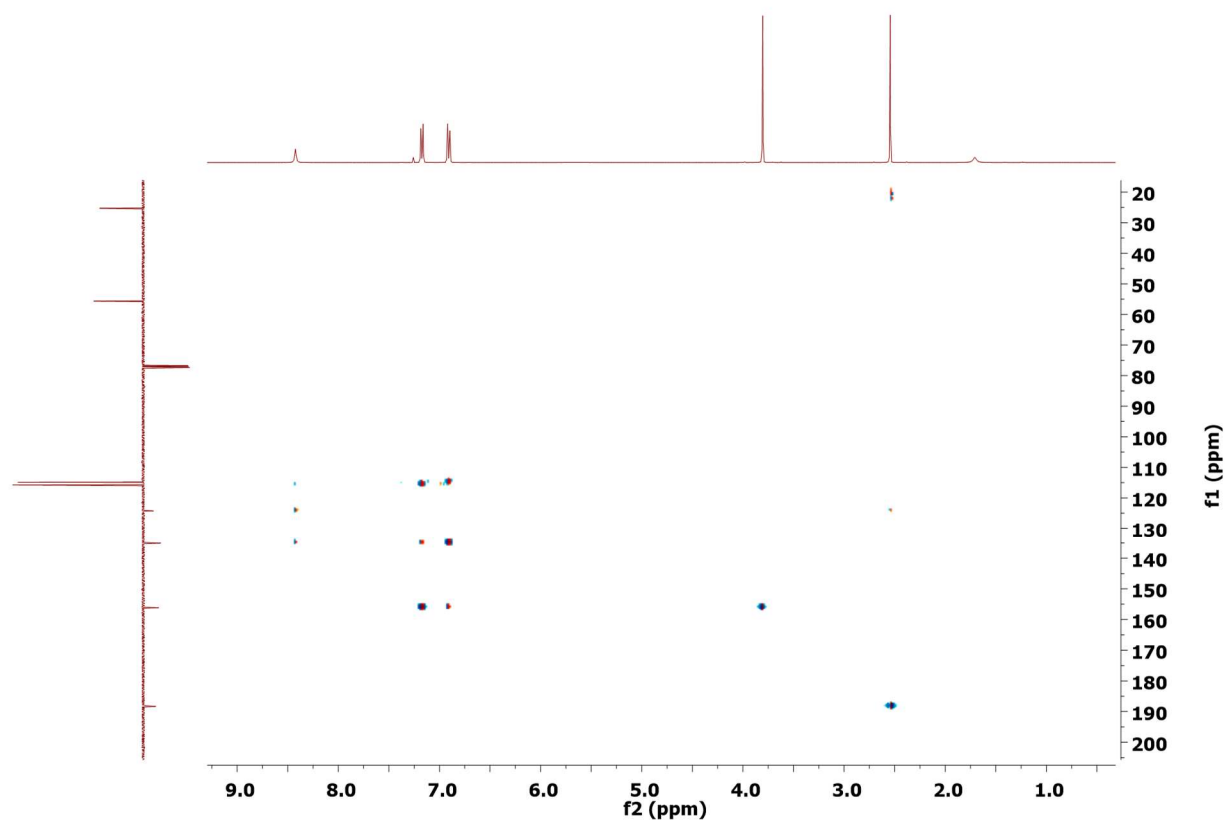



IR spectrum of (Z)-N-(4-methoxyphenyl)-2-oxopropanehydrazonoyl chloride

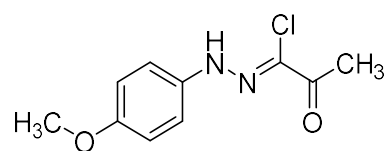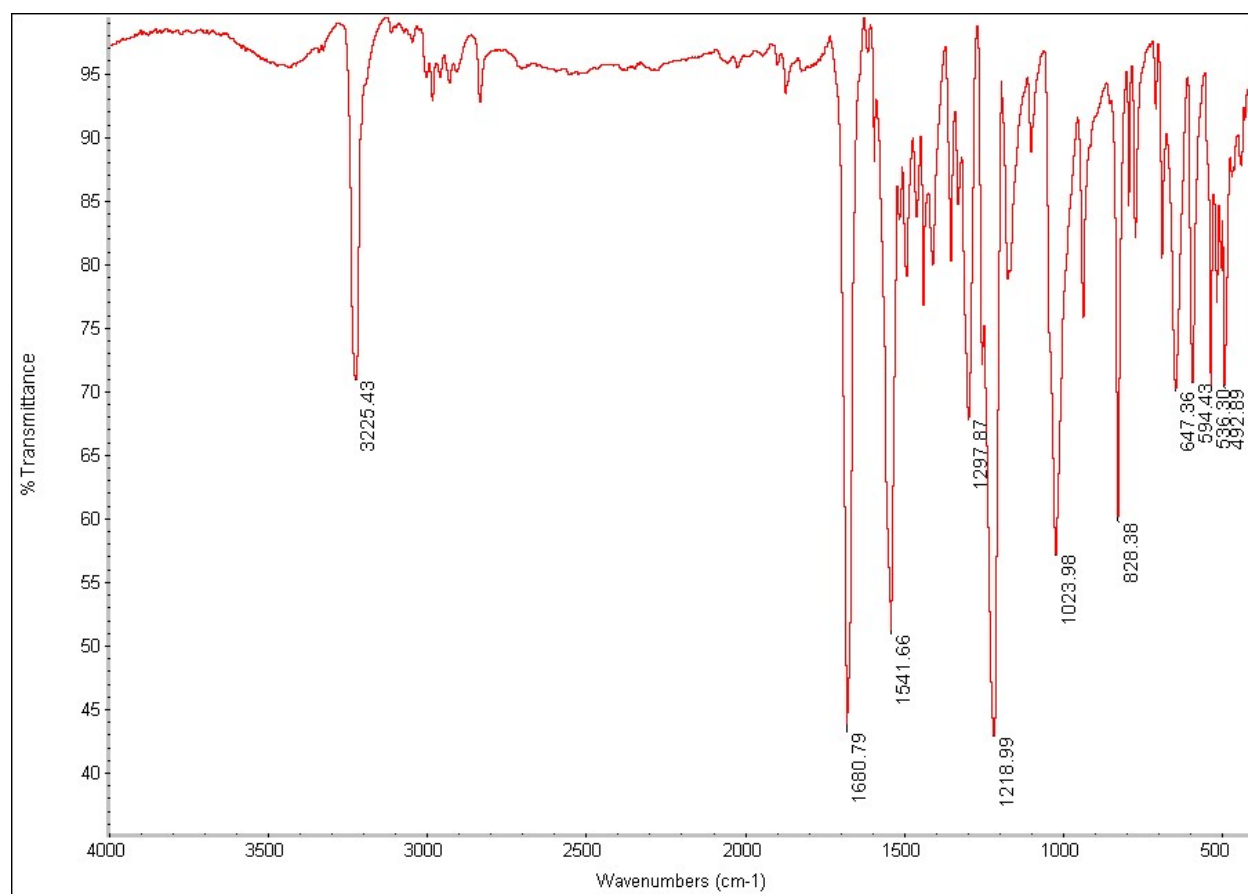

$^1\text{H}$  NMR (DMSO- $d_6$ ) spectrum of (Z)-N-(3,5-bis(trifluoromethyl)phenyl)-2-oxopropanhydrazonoyl chloride (**29j**)

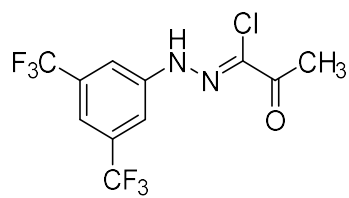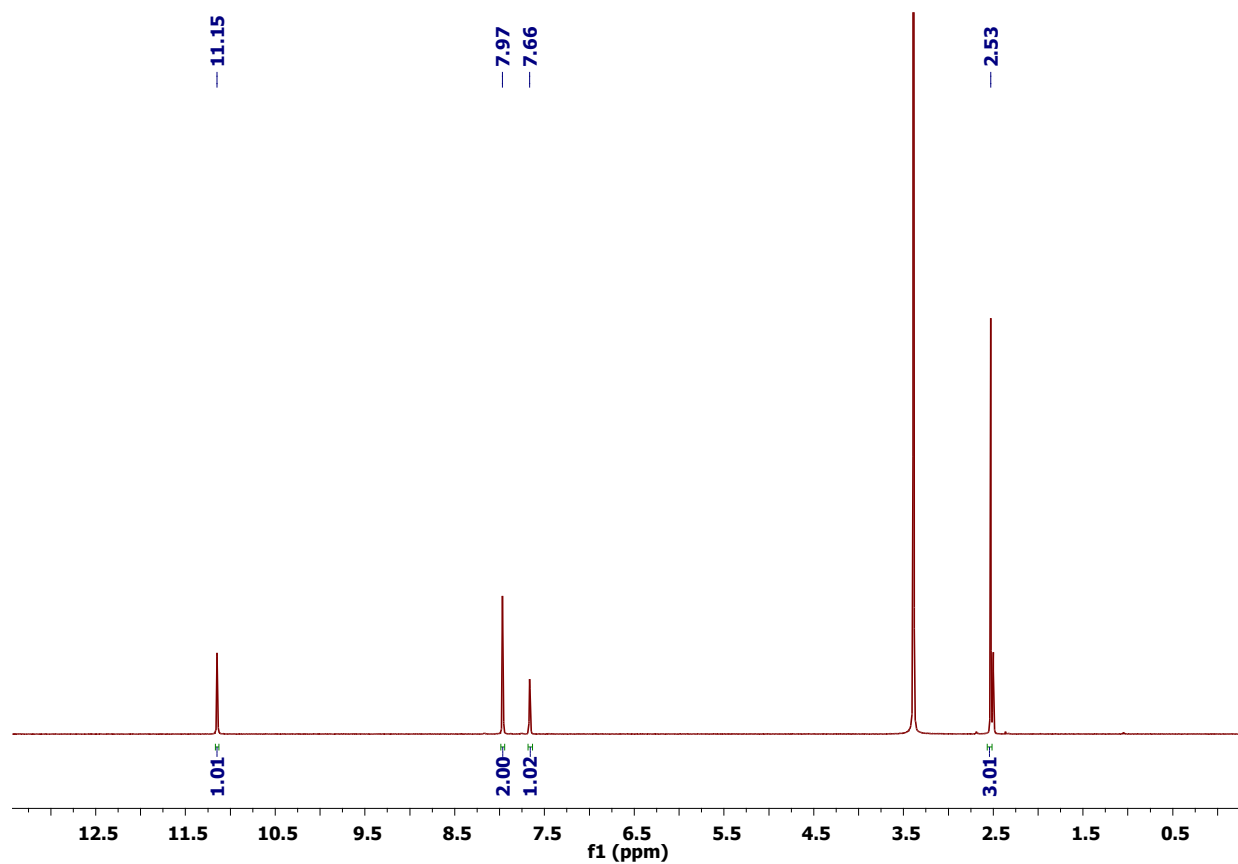

$^{13}\text{C}$  NMR (DMSO- $d_6$ ) spectrum of (Z)-N-(3,5-bis(trifluoromethyl)phenyl)-2-oxopropanhydrazonoyl chloride

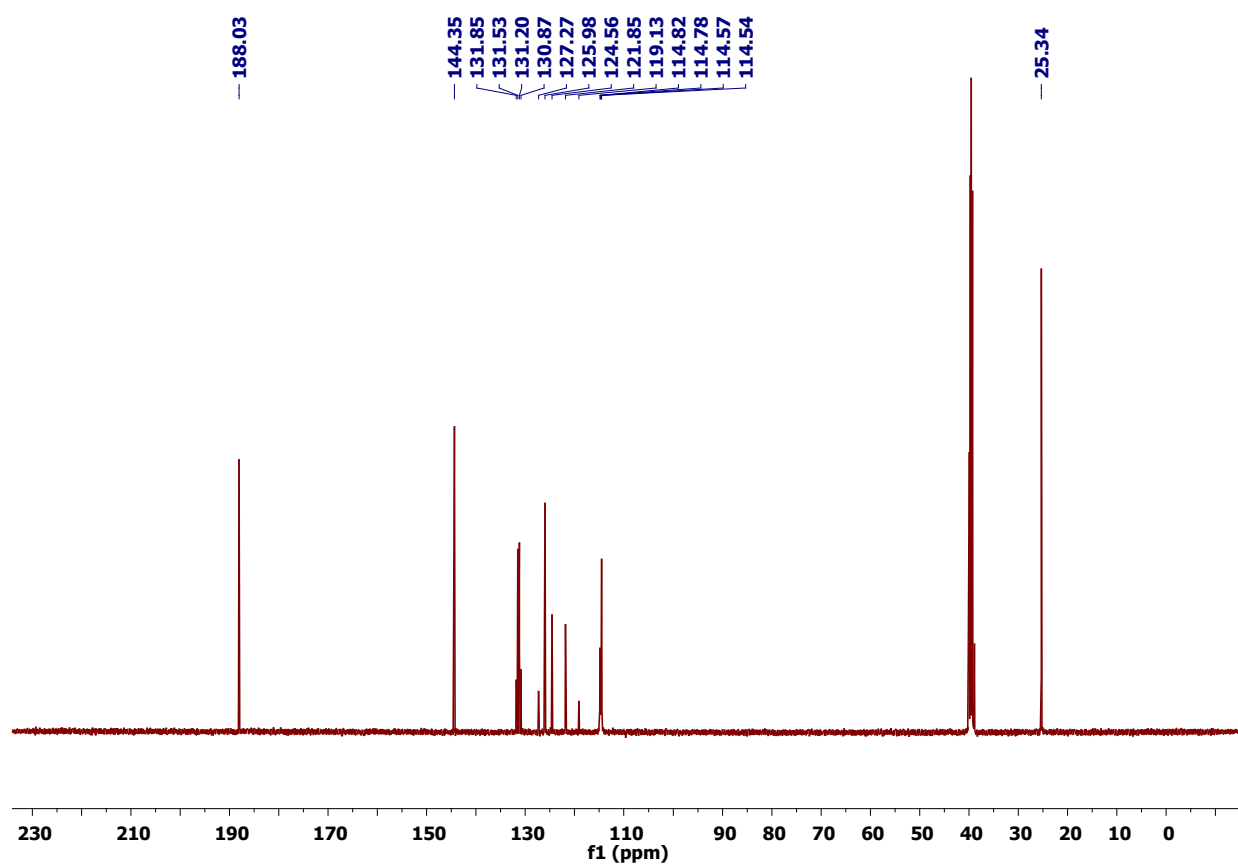

$^{13}\text{C}$  CRAPT NMR ( $\text{DMSO-d}_6$ ) spectrum of (Z)-N-(3,5-bis(trifluoromethyl)phenyl)-2-oxopropanhydrazonoyl chloride

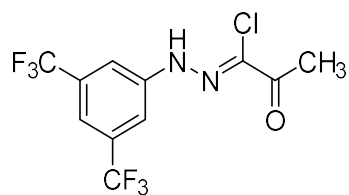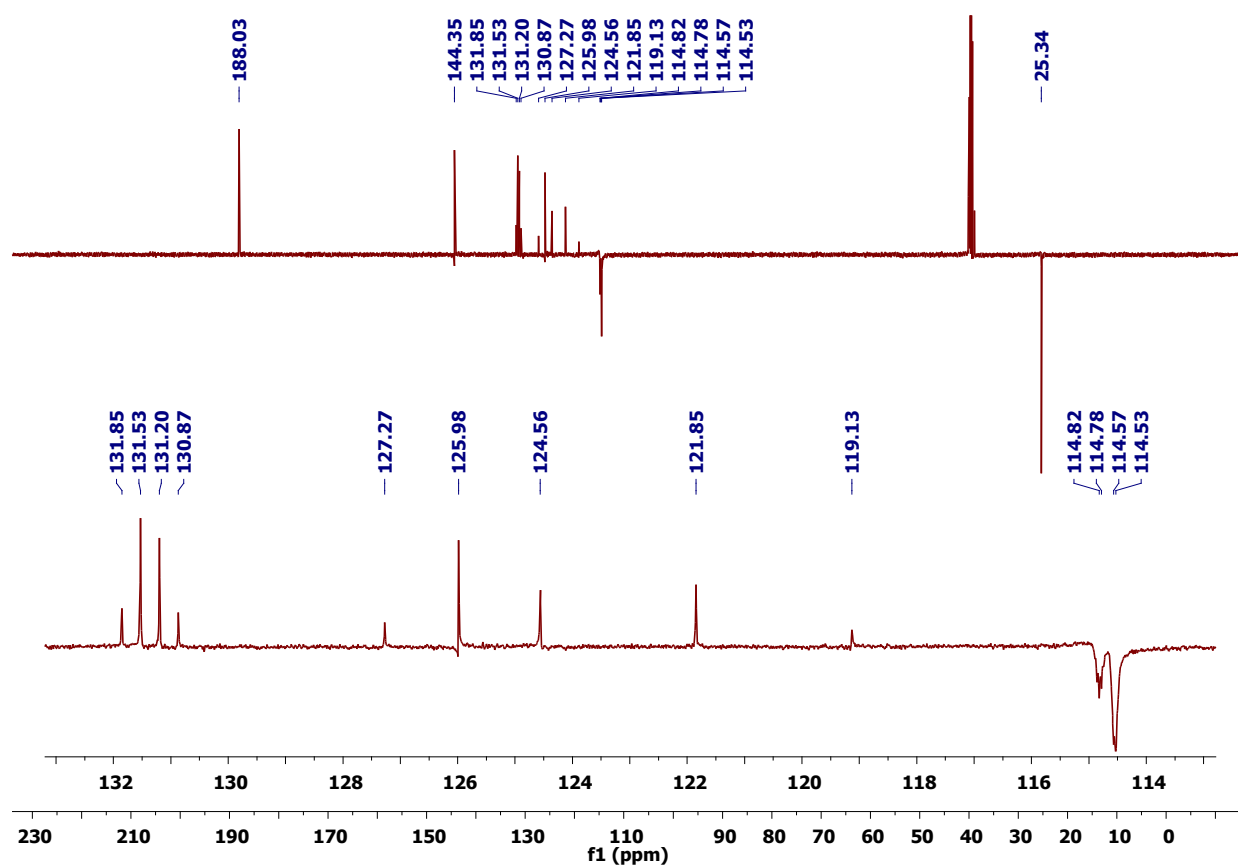

$^1\text{H}$ - $^1\text{H}$ -gDQCOSY NMR (DMSO- $d_6$ ) spectrum of (Z)-N-(3,5-bis(trifluoromethyl)phenyl)-2-oxopropanehydrazonoyl chloride

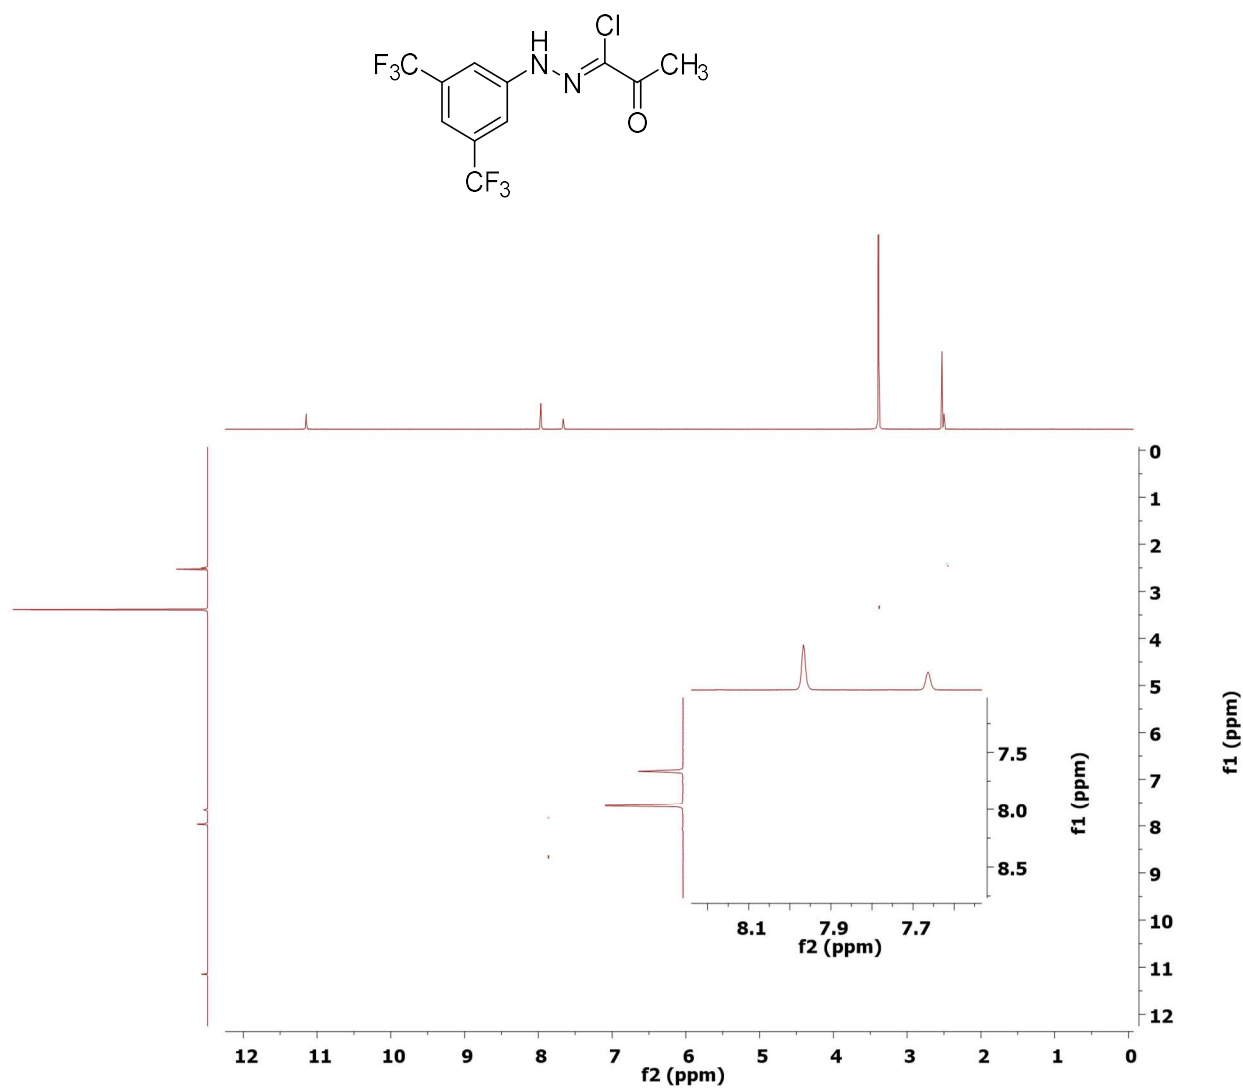

$^1\text{H}$ - $^{13}\text{C}$ -HSQC NMR (DMSO- $d_6$ ) spectrum of (Z)-N-(3,5-bis(trifluoromethyl)phenyl)-2-oxopropanhydrazonoyl chloride

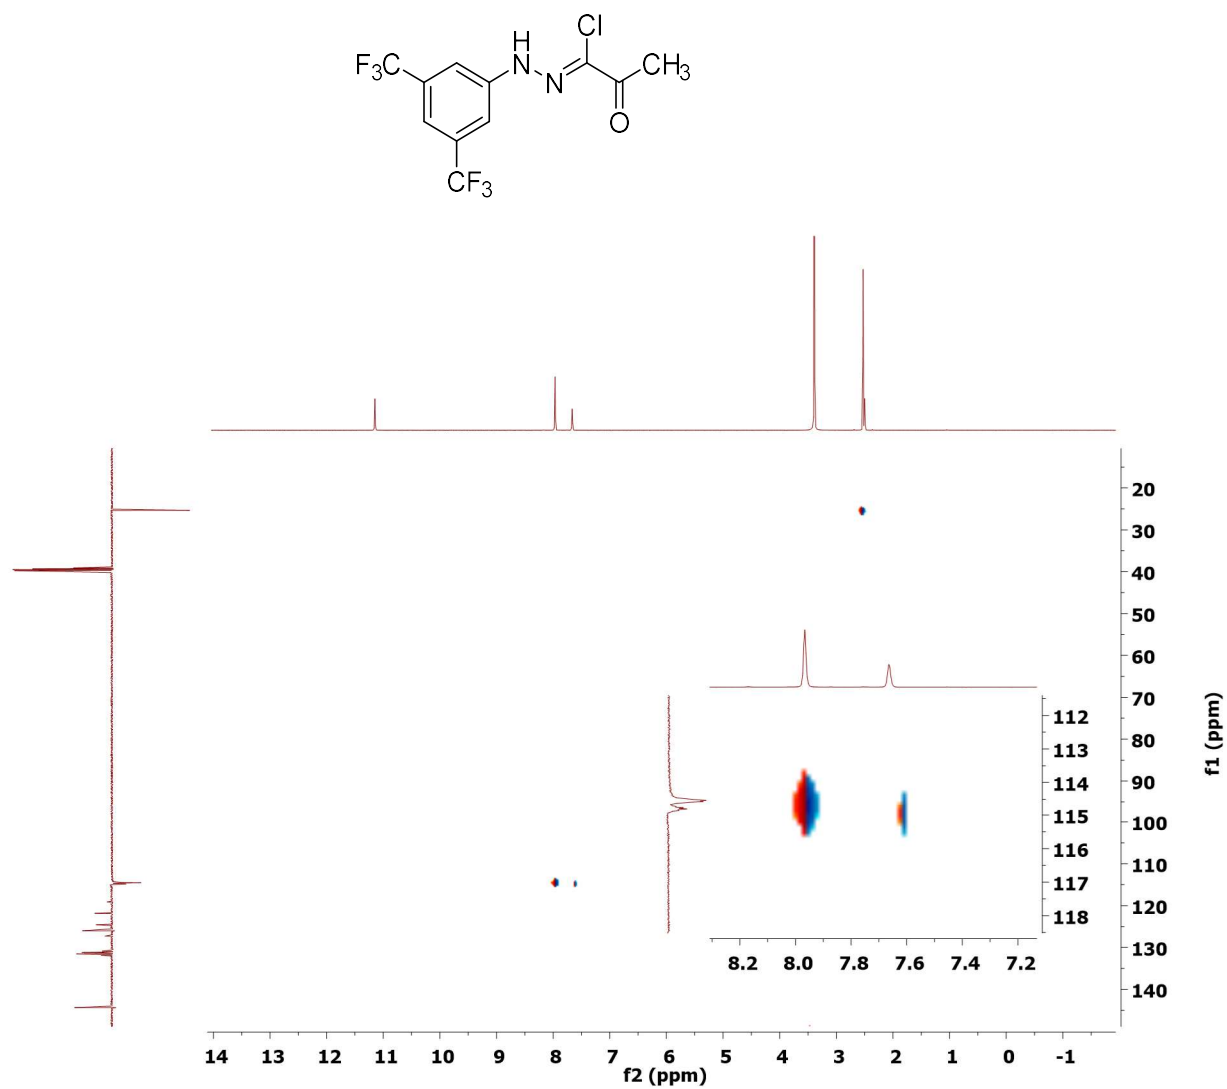

$^1\text{H}$ - $^{13}\text{C}$ -gHMBC NMR ( $\text{DMSO-d}_6$ ) spectrum of (Z)-N-(3,5-bis(trifluoromethyl)phenyl)-2-oxopropanhydrazonoyl chloride

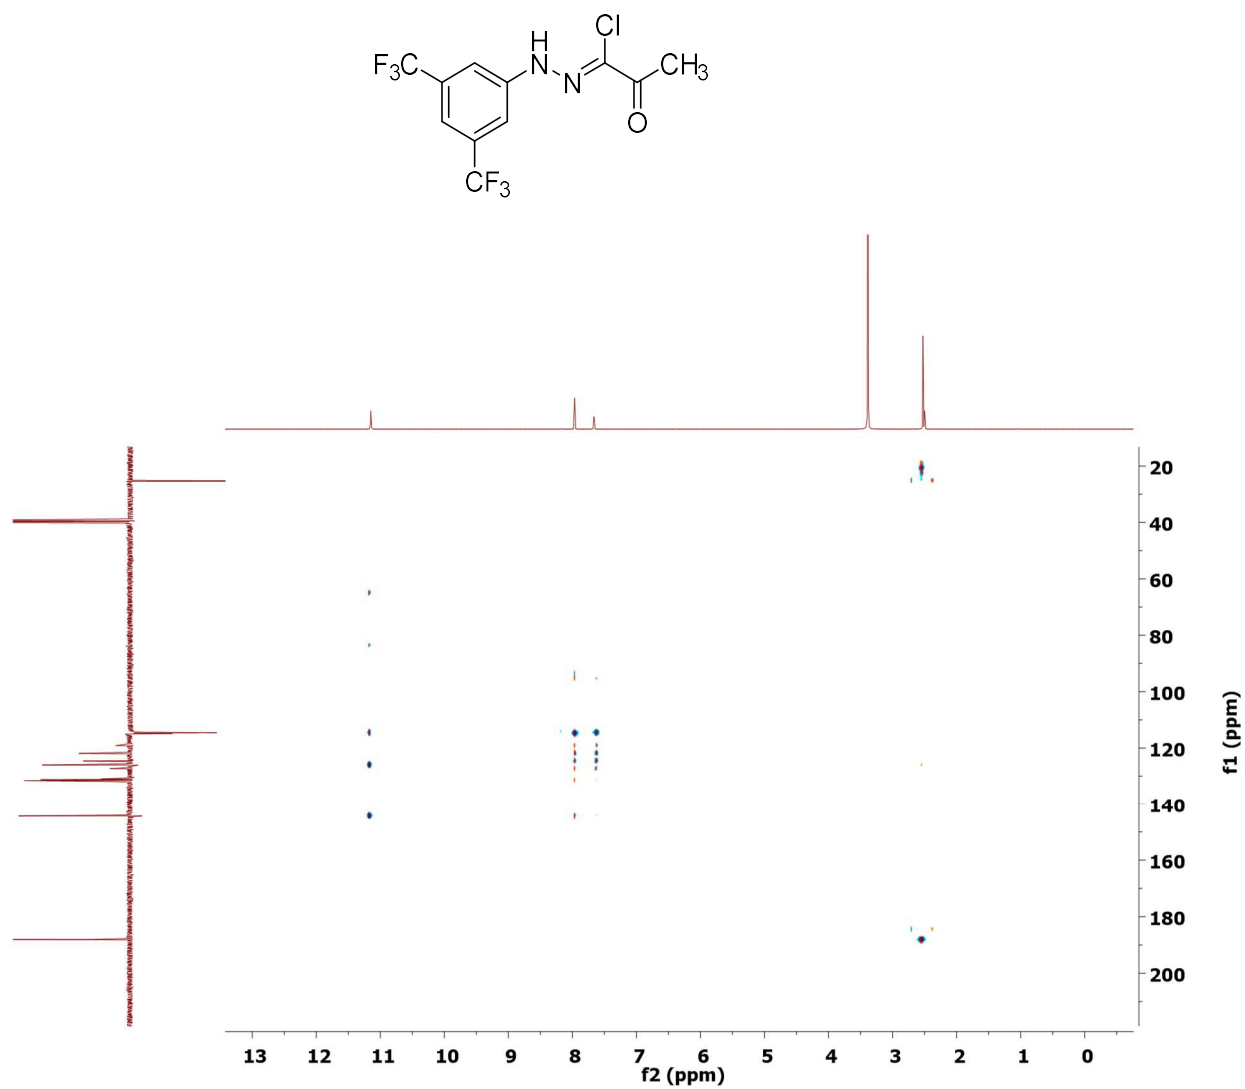

IR spectrum of (Z)-N-(3,5-bis(trifluoromethyl)phenyl)-2-oxopropanehydrazonoyl chloride

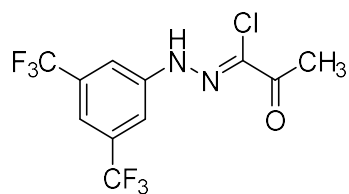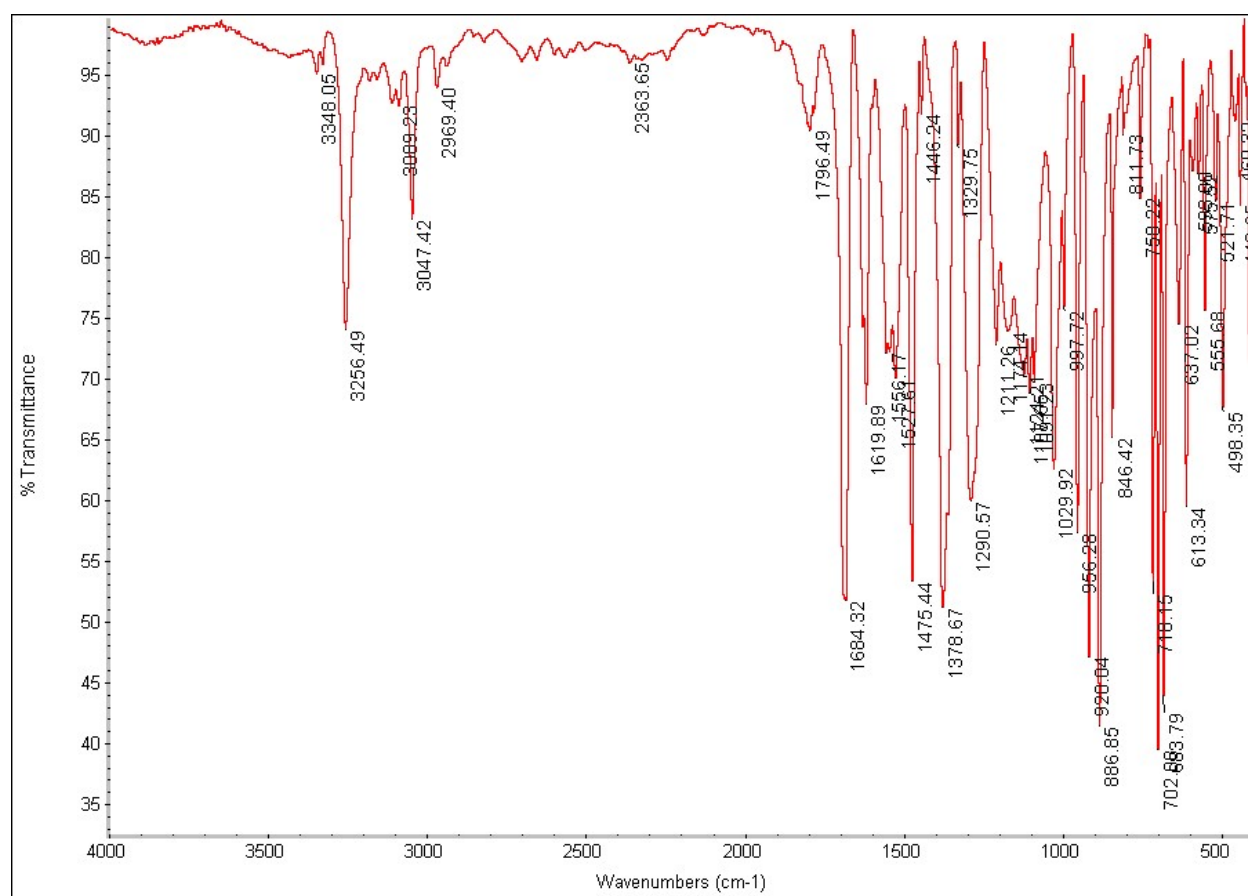



$^1\text{H}$  NMR ( $\text{CDCl}_3$ ) spectrum of (Z)-N-(naphthalen-1-yl)-2-oxopropanehydrazonoyl chloride (**29k**)

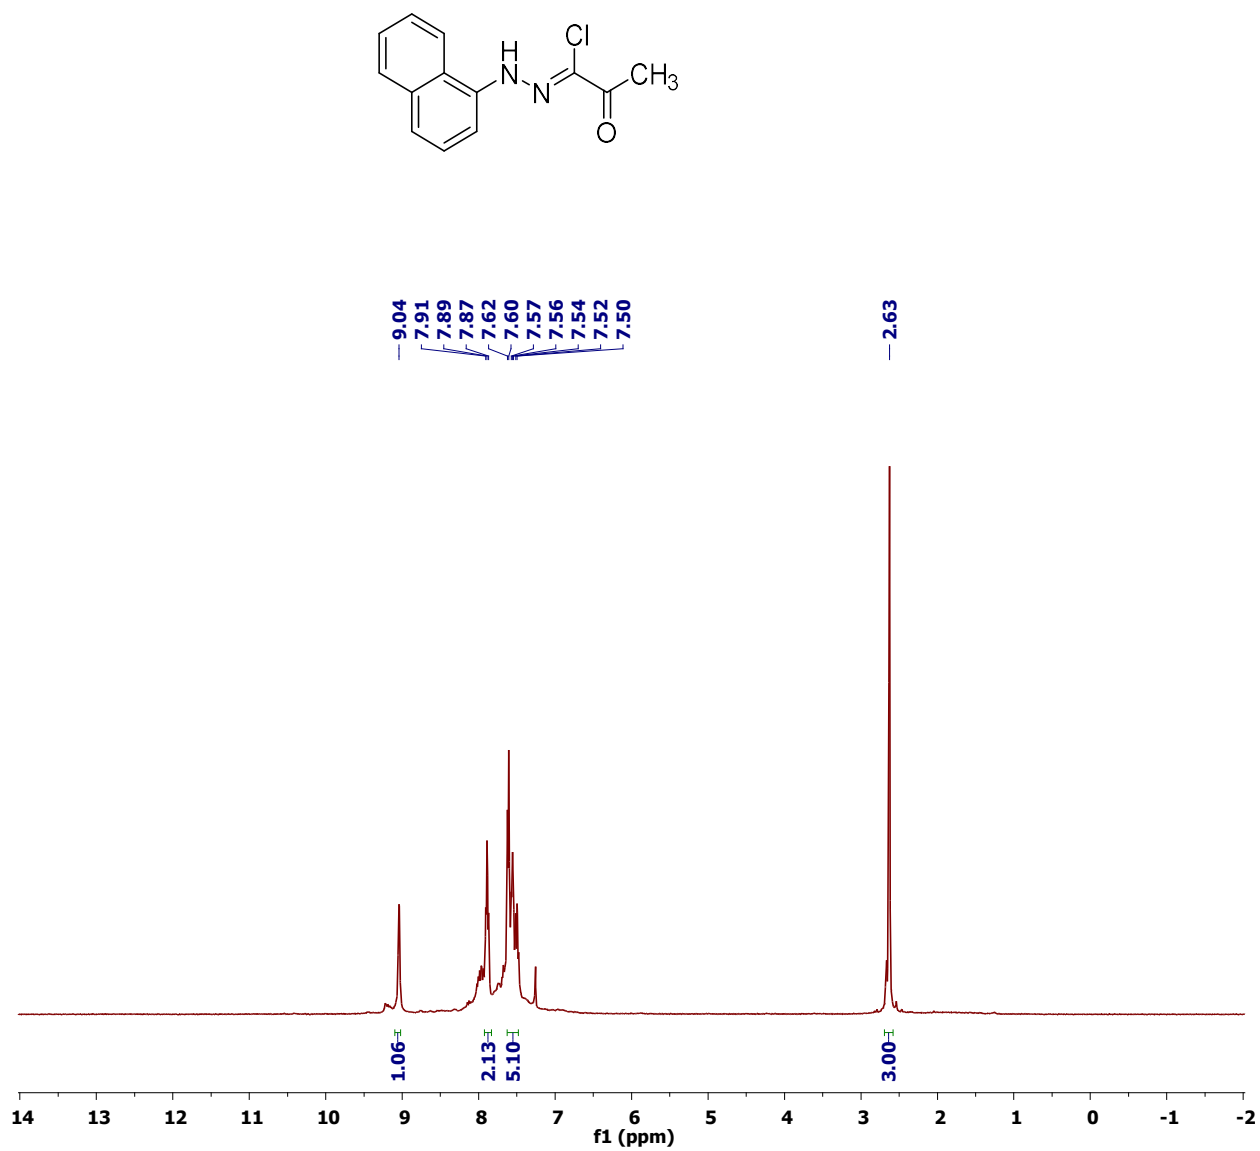

$^{13}\text{C}$  NMR ( $\text{CDCl}_3$ ) spectrum of (Z)-N-(naphthalen-1-yl)-2-oxopropanehydrazonoyl chloride

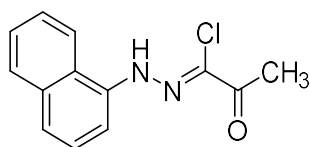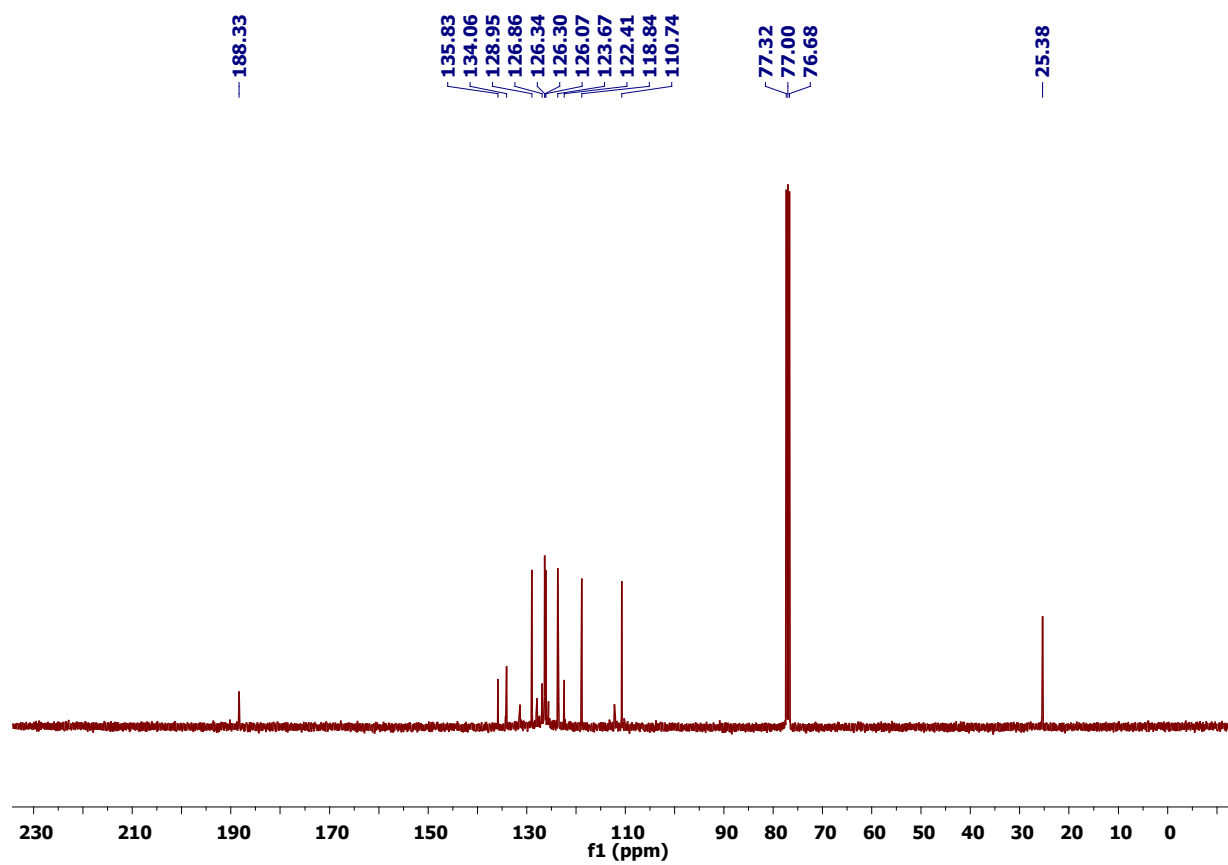

$^{13}\text{C}$  CRAPT NMR ( $\text{CDCl}_3$ ) spectrum of (Z)-N-(naphthalen-1-yl)-2-oxopropanehydrazonoyl chloride

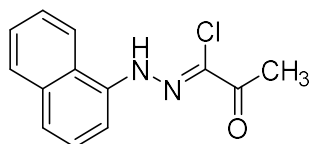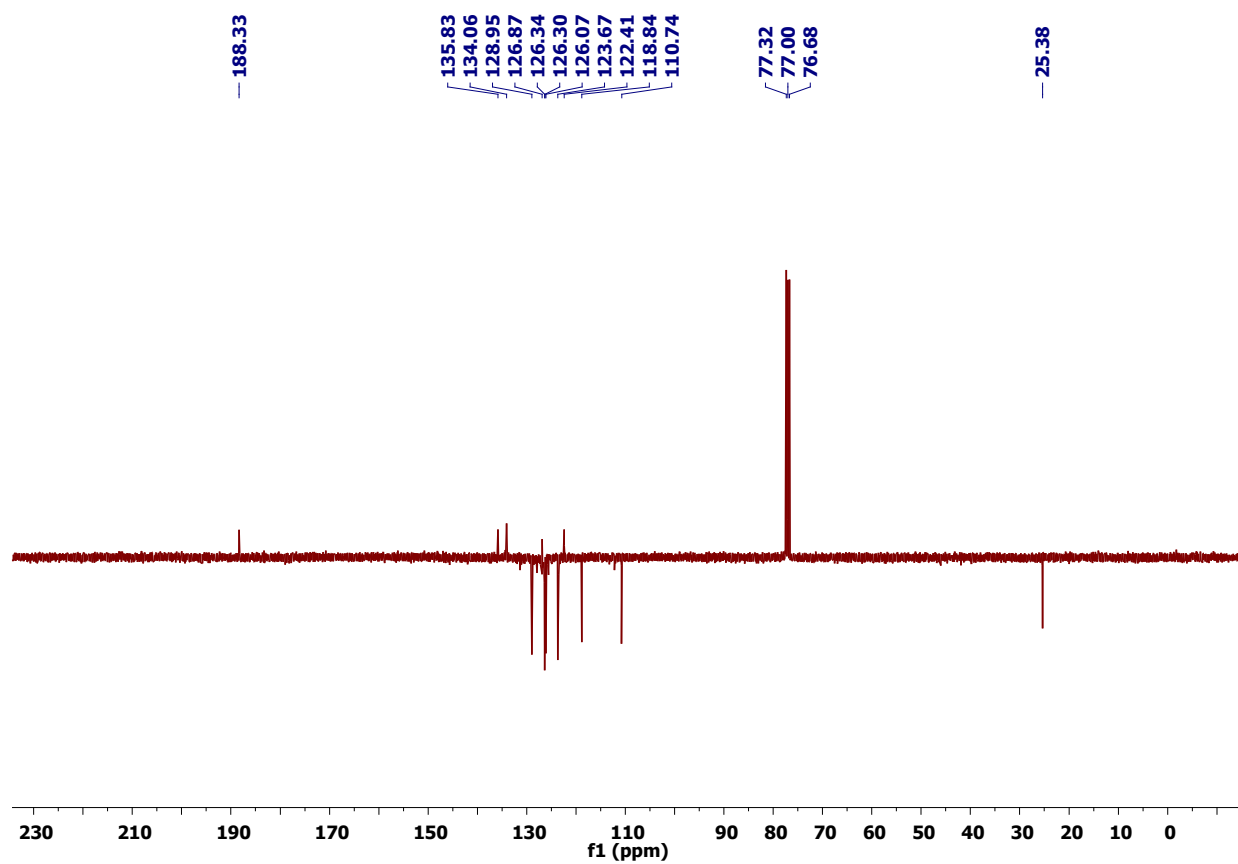

$^1\text{H}$ - $^1\text{H}$ -gDQCOSY NMR ( $\text{CDCl}_3$ ) spectrum of (Z)-N-(naphthalen-1-yl)-2-oxopropanehydrazonoyl chloride

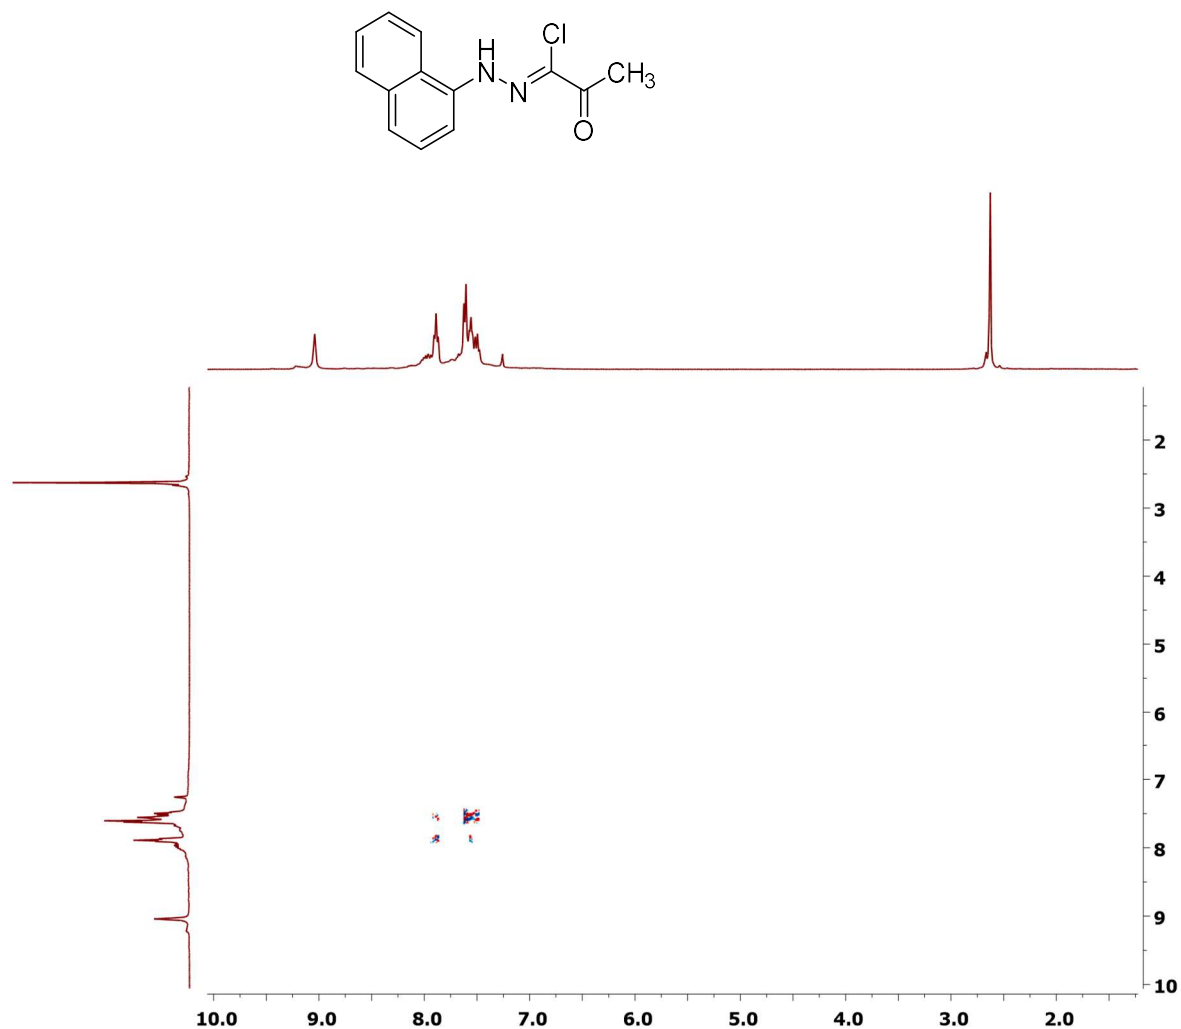

$^1\text{H}$ - $^{13}\text{C}$ -HSQC NMR ( $\text{CDCl}_3$ ) spectrum of (Z)-N-(naphthalen-1-yl)-2-oxopropanehydrazonoyl chloride

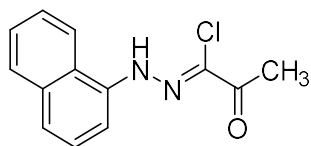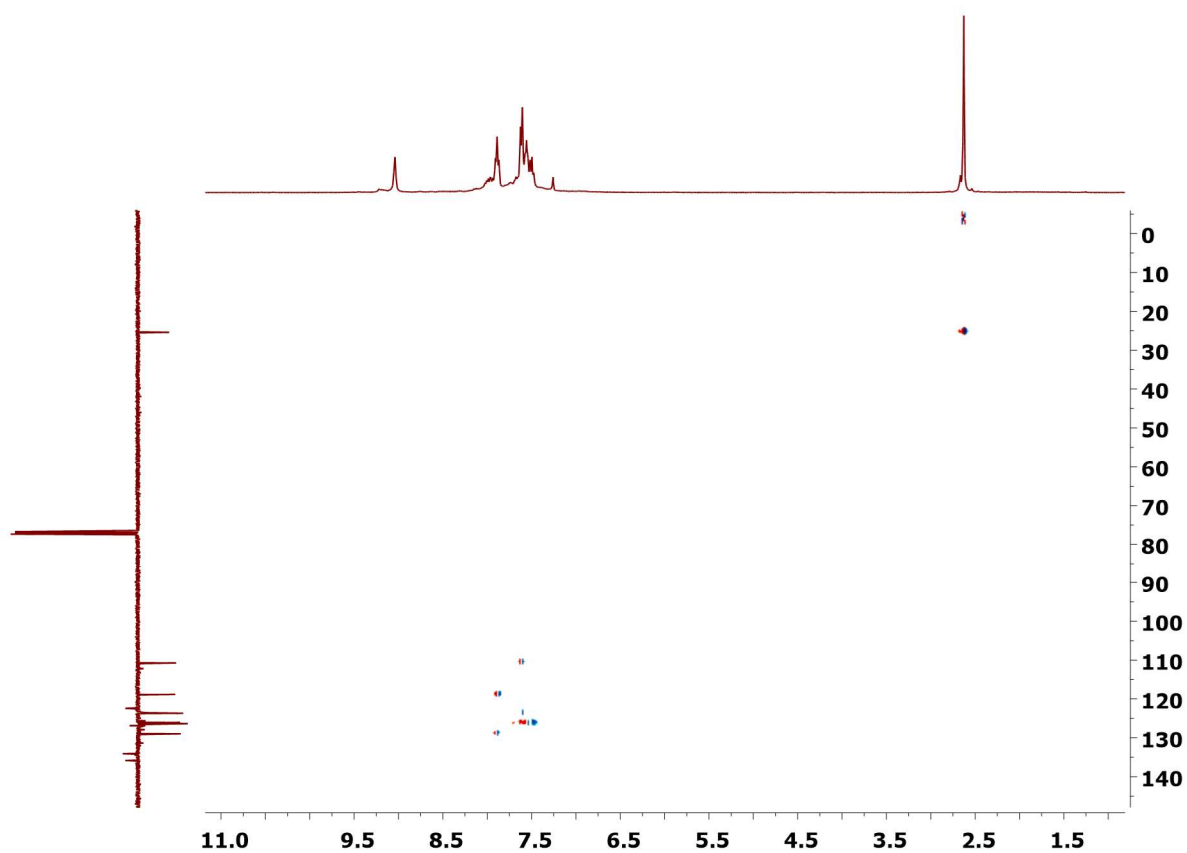

$^1\text{H}$ - $^{13}\text{C}$ -gHMBC NMR ( $\text{CDCl}_3$ ) spectrum of (Z)-N-(naphthalen-1-yl)-2-oxopropanehydrazonoyl chloride

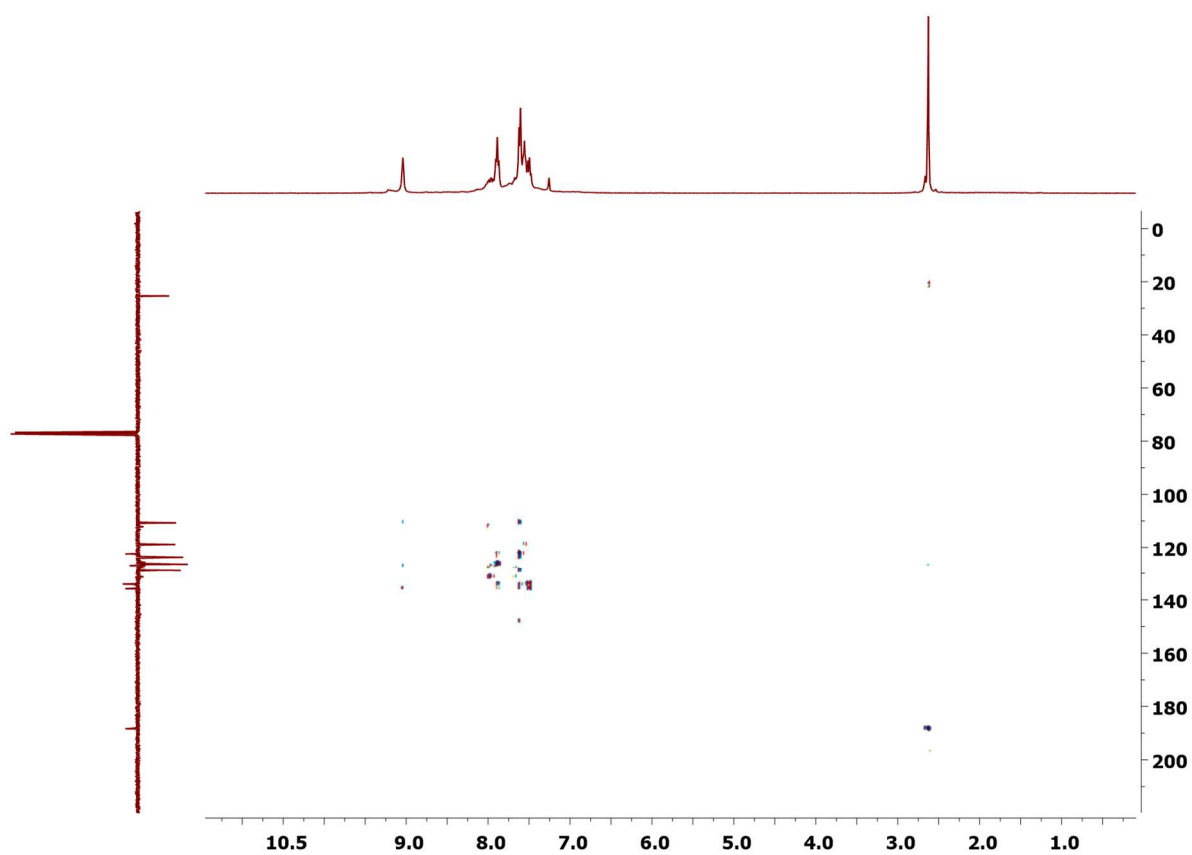

IR spectrum of (Z)-N-(naphthalen-1-yl)-2-oxopropanehydrazonoyl chloride

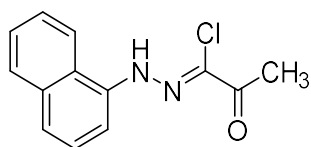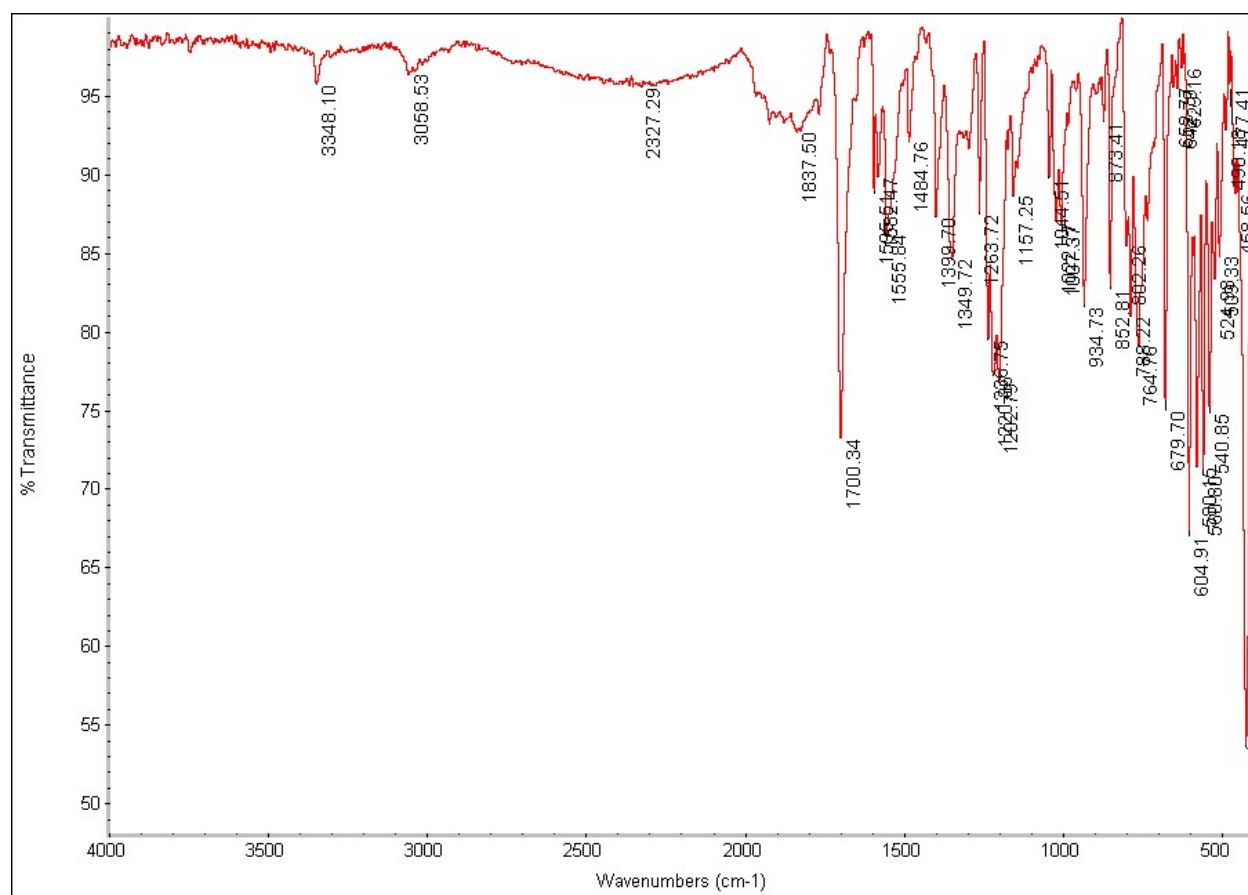

$^1\text{H}$  NMR ( $\text{CDCl}_3$ ) spectrum of (Z)-N-(2,3-difluorophenyl)-2-oxopropanehydrazonoyl chloride (29l)

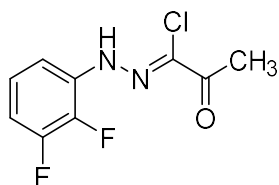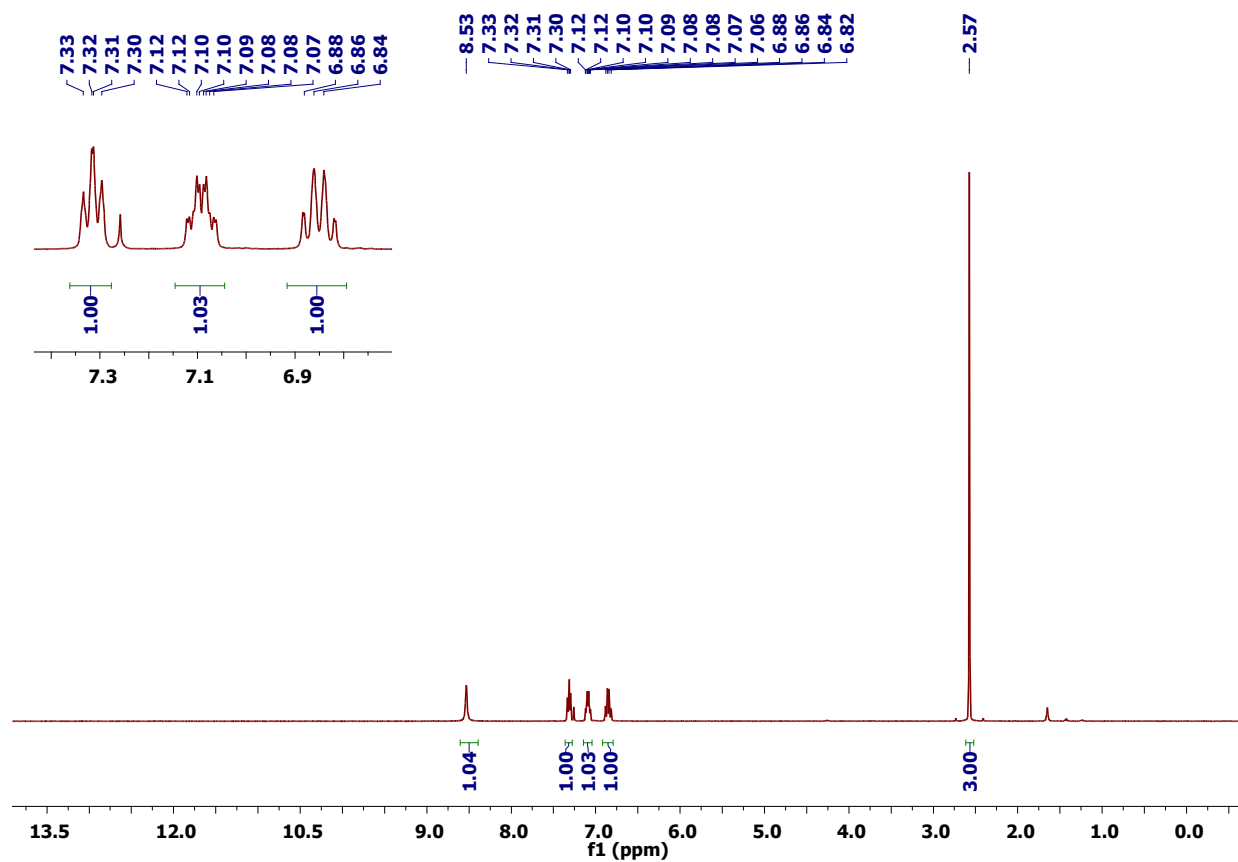



$^{13}\text{C}$  NMR ( $\text{CDCl}_3$ ) spectrum of (Z)-N-(2,3-difluorophenyl)-2-oxopropanehydrazonoyl chloride

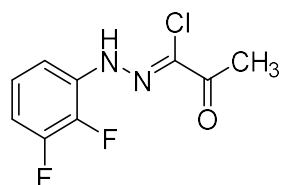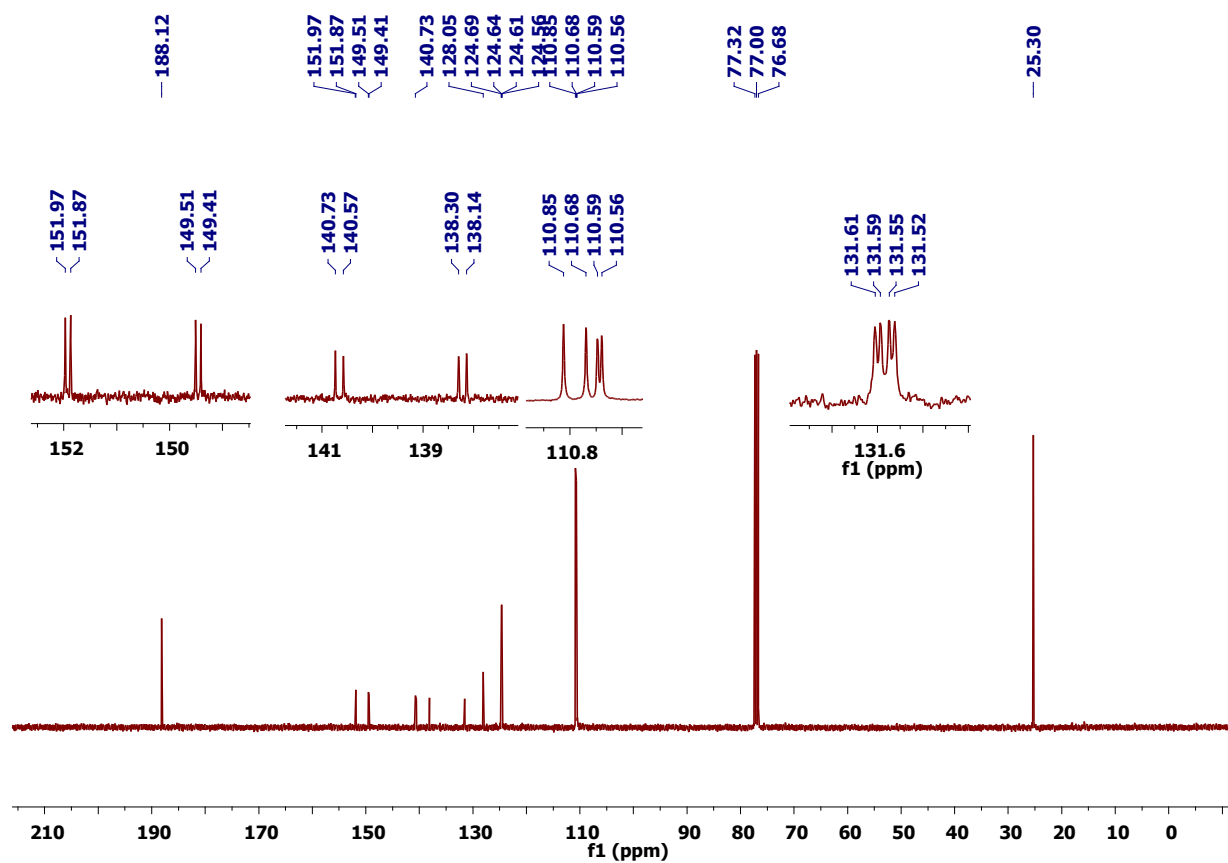

$^{13}\text{C}$  CRAPT NMR ( $\text{CDCl}_3$ ) spectrum of (Z)-N-(2,3-difluorophenyl)-2-oxopropanehydrazonoyl chloride

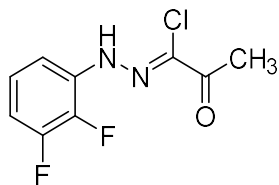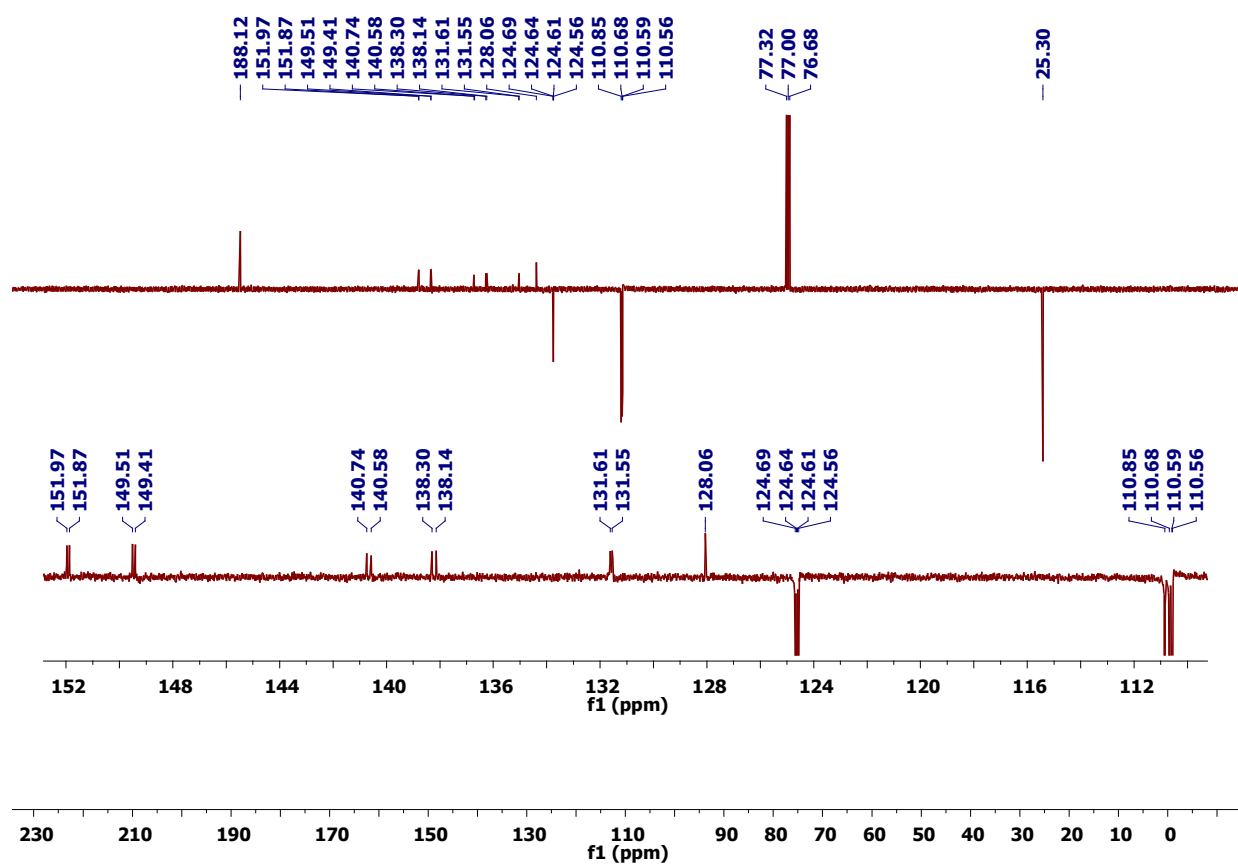

$^1\text{H}$ - $^1\text{H}$ -gDQCOSY NMR ( $\text{CDCl}_3$ ) spectrum of (Z)-N-(2,3-difluorophenyl)-2-oxopropanehydrazonoyl chloride

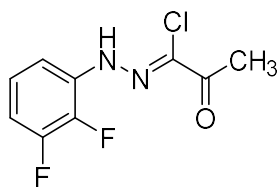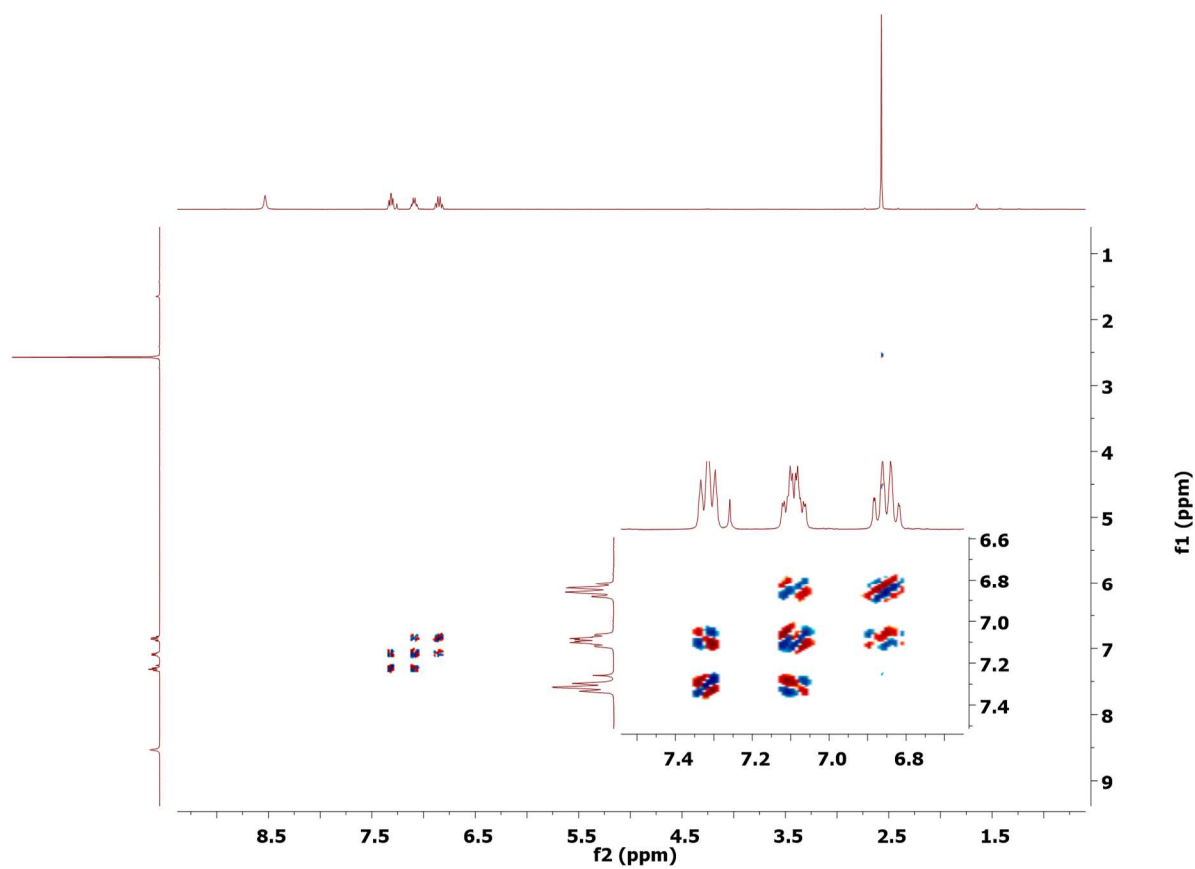

$^1\text{H}$ - $^{13}\text{C}$ -HSQC NMR ( $\text{CDCl}_3$ ) spectrum of (Z)-N-(2,3-difluorophenyl)-2-oxopropanehydrazonoyl chloride

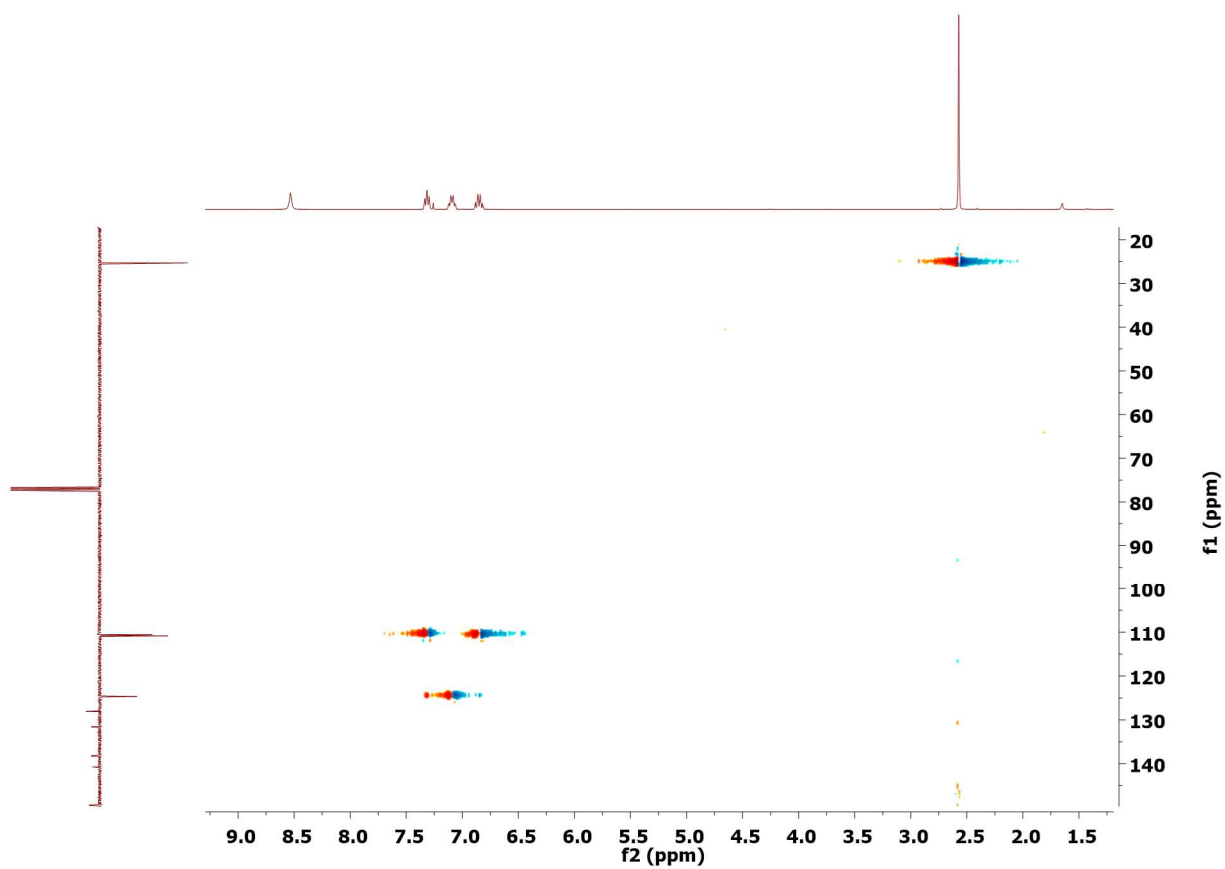

$^1\text{H}$ - $^{13}\text{C}$ -gHMBC NMR ( $\text{CDCl}_3$ ) spectrum of (Z)-N-(2,3-difluorophenyl)-2-oxopropanhydrazonoyl chloride

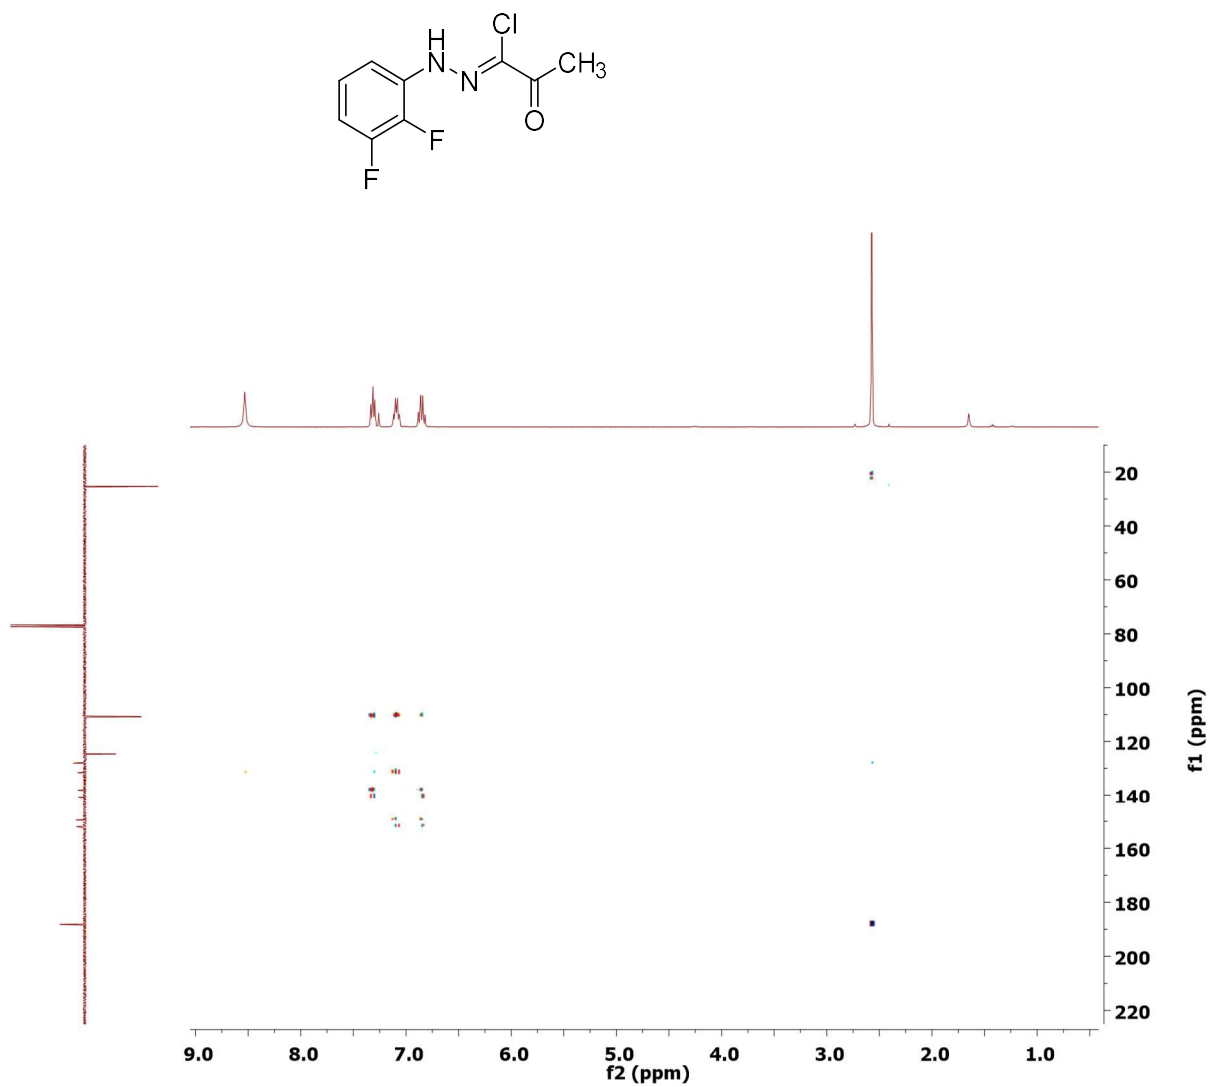

IR spectrum of (Z)-N-(2,3-difluorophenyl)-2-oxopropanehydrazonoyl chloride

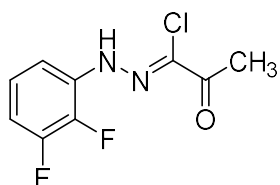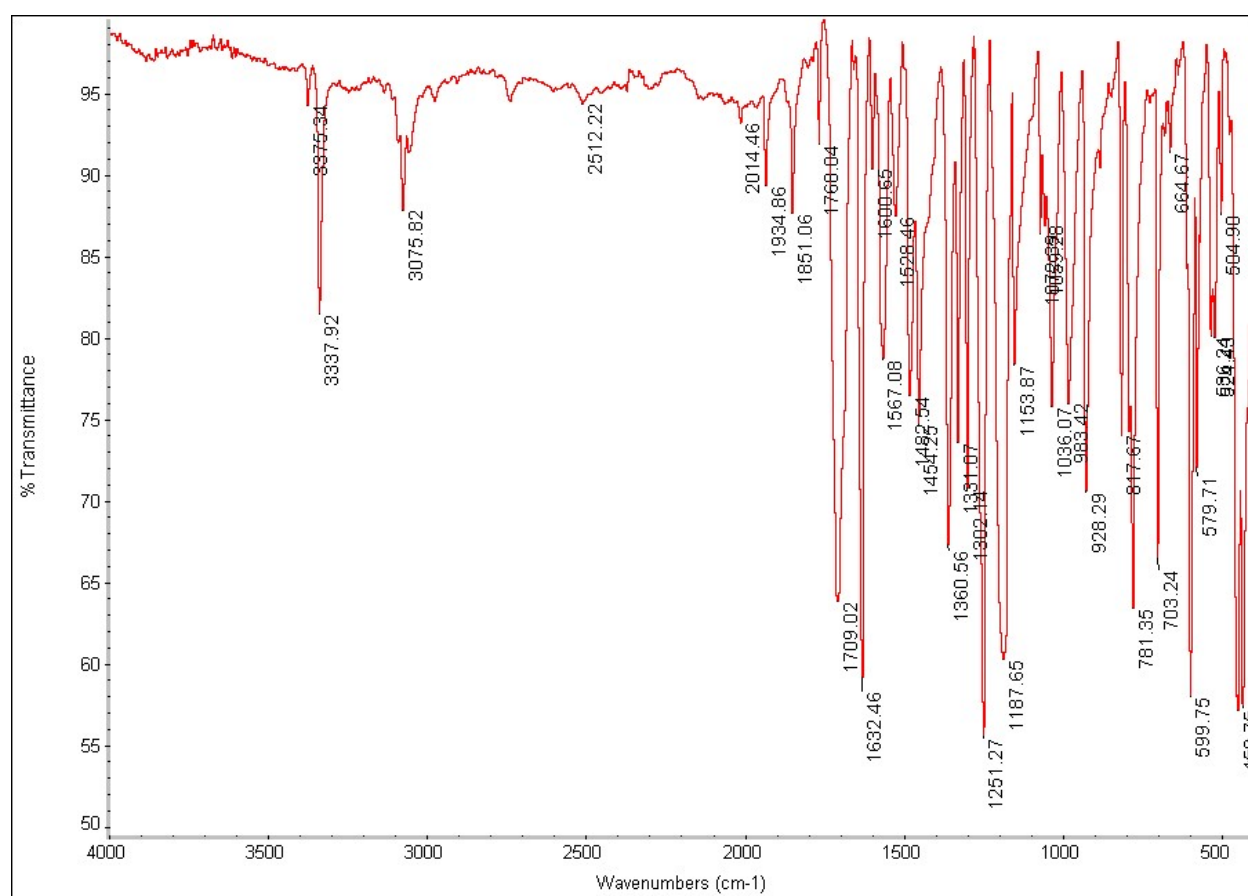

$^1\text{H}$  NMR ( $\text{CDCl}_3$ ) spectrum of (Z)-N-(benzo[d][1,3]dioxol-5-yl)-2-oxopropanehydrazonoyl chloride (**29m**)

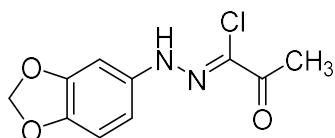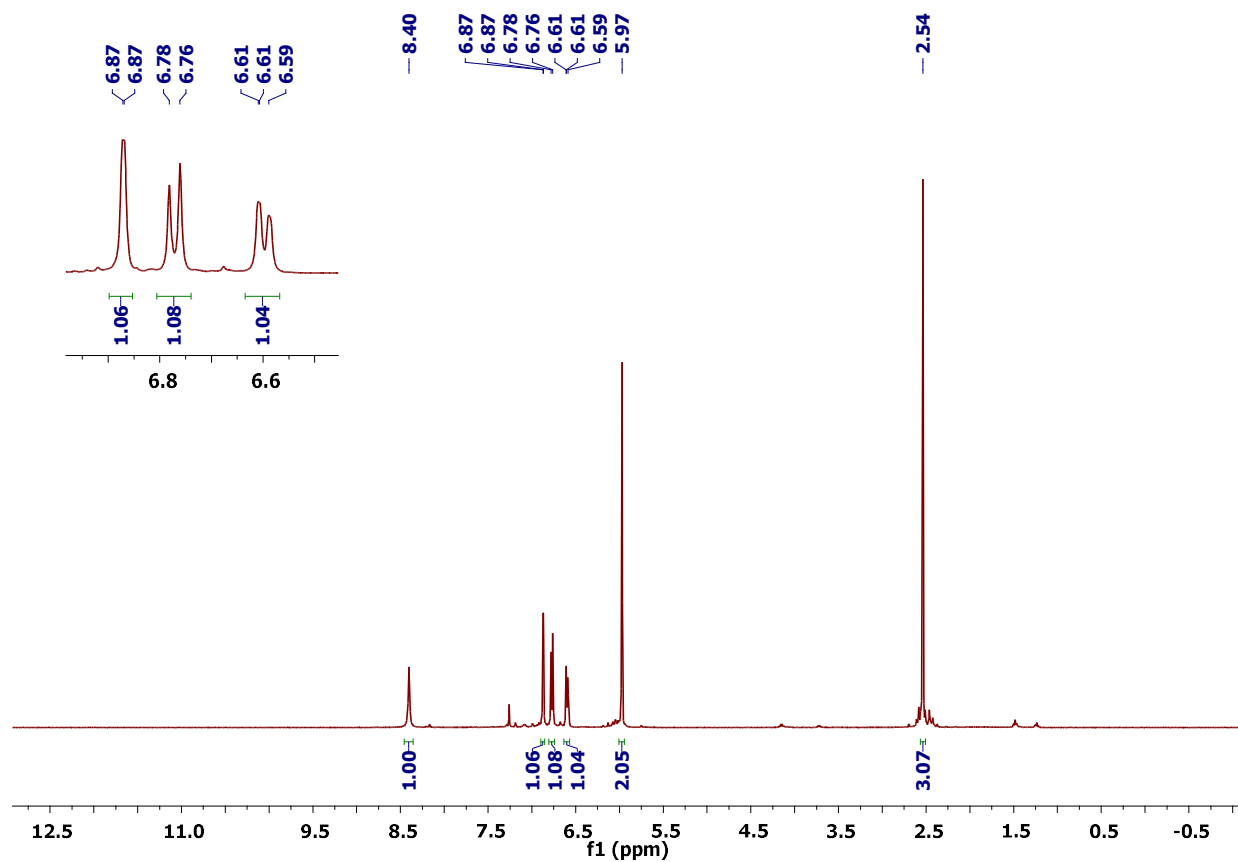

$^{13}\text{C}$  NMR ( $\text{CDCl}_3$ ) spectrum of (Z)-N-(benzo[d][1,3]dioxol-5-yl)-2-oxopropanehydrazonoyl chloride

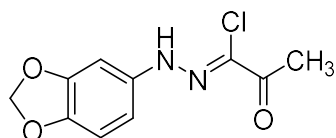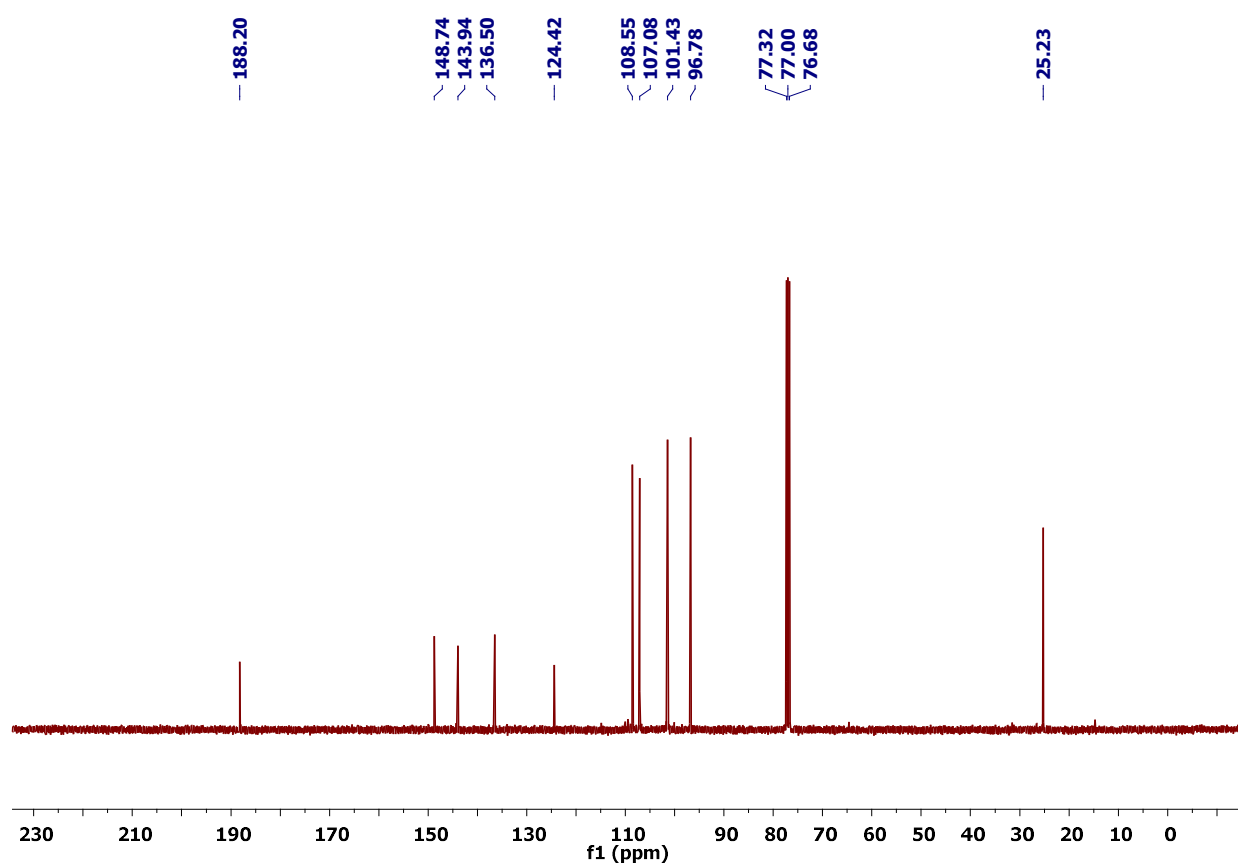



$^{13}\text{C}$  CRAPT NMR ( $\text{CDCl}_3$ ) spectrum of (Z)-N-(benzo[d][1,3]dioxol-5-yl)-2-oxopropanhydrazonoyl chloride

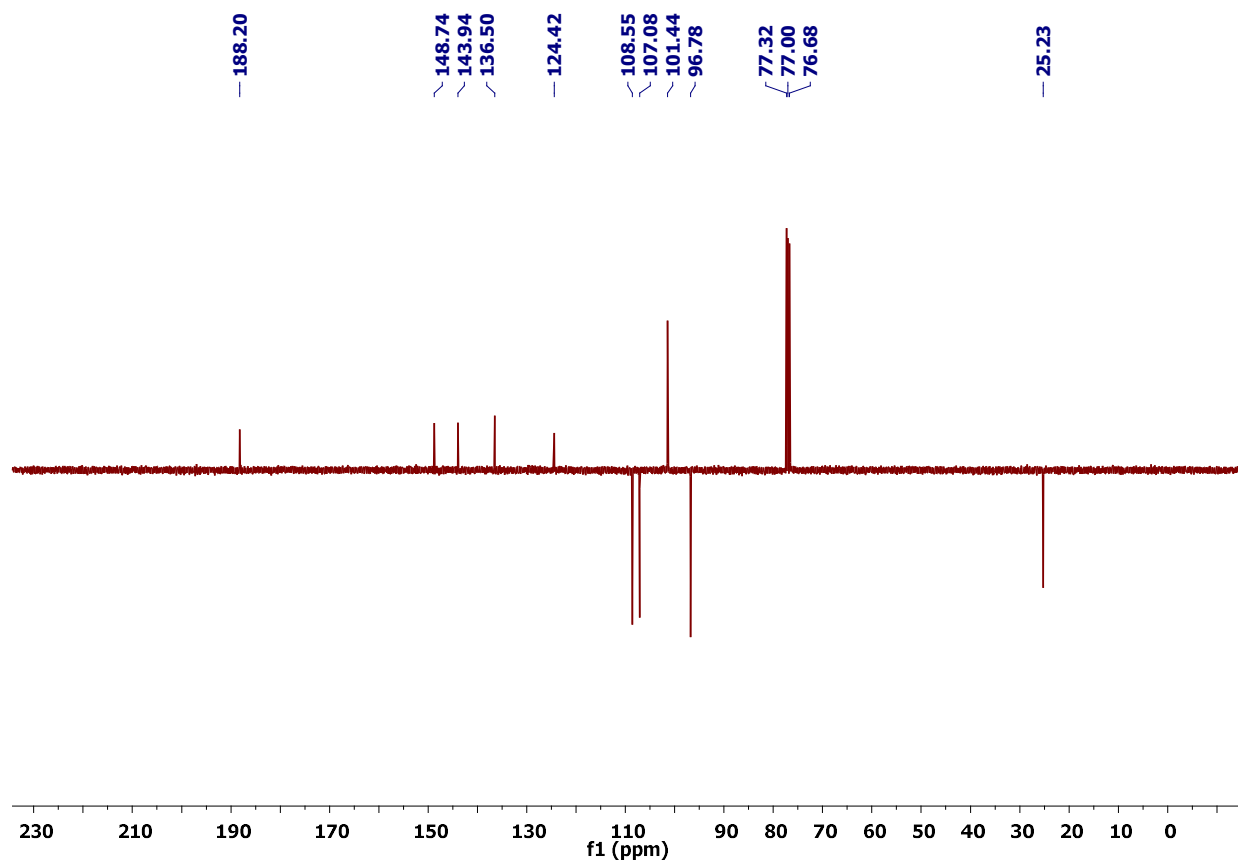

$^1\text{H}$ - $^1\text{H}$ -gDQCOSY NMR ( $\text{CDCl}_3$ ) spectrum of (Z)-N-(benzo[d][1,3]dioxol-5-yl)-2-oxopropanehydrazonoyl chloride

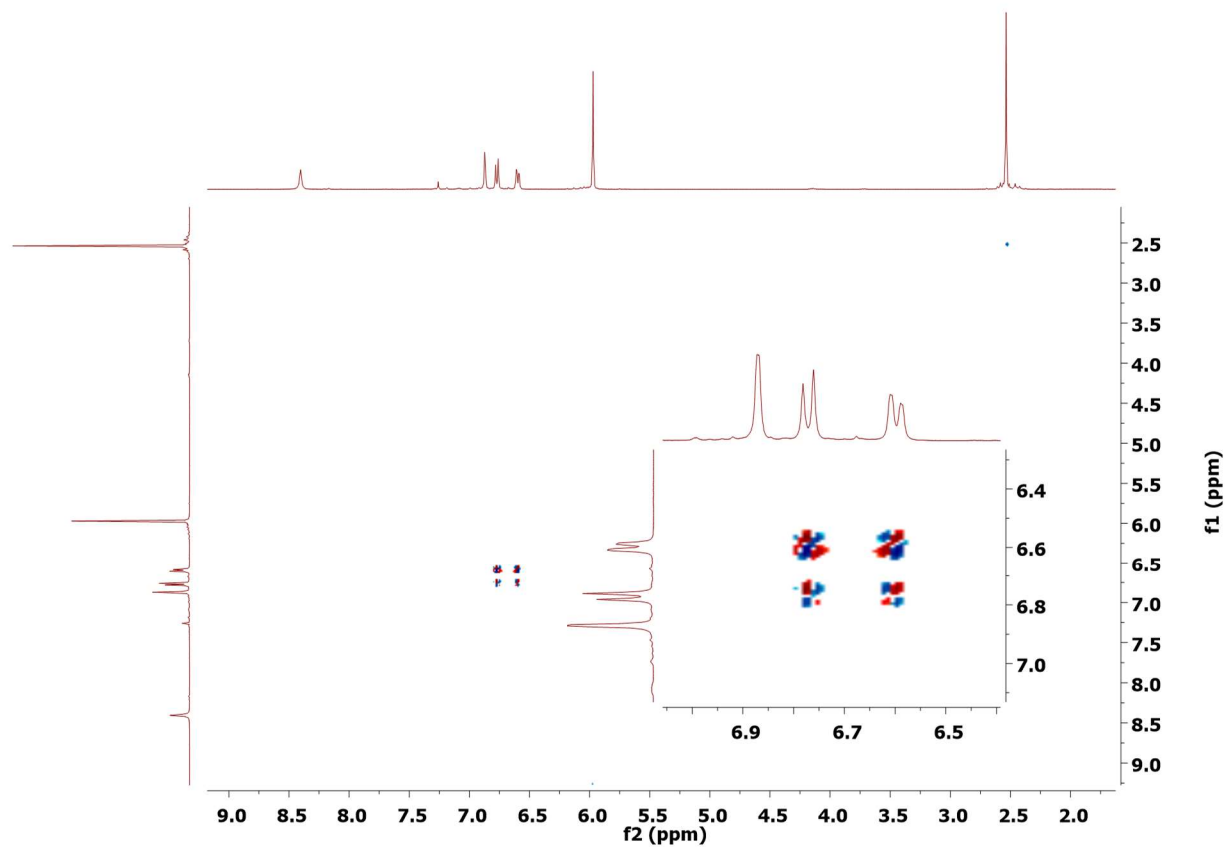

$^1\text{H}$ - $^{13}\text{C}$ -HSQC NMR ( $\text{CDCl}_3$ ) spectrum of (Z)-N-(benzo[d][1,3]dioxol-5-yl)-2-oxopropanehydrazonoyl chloride

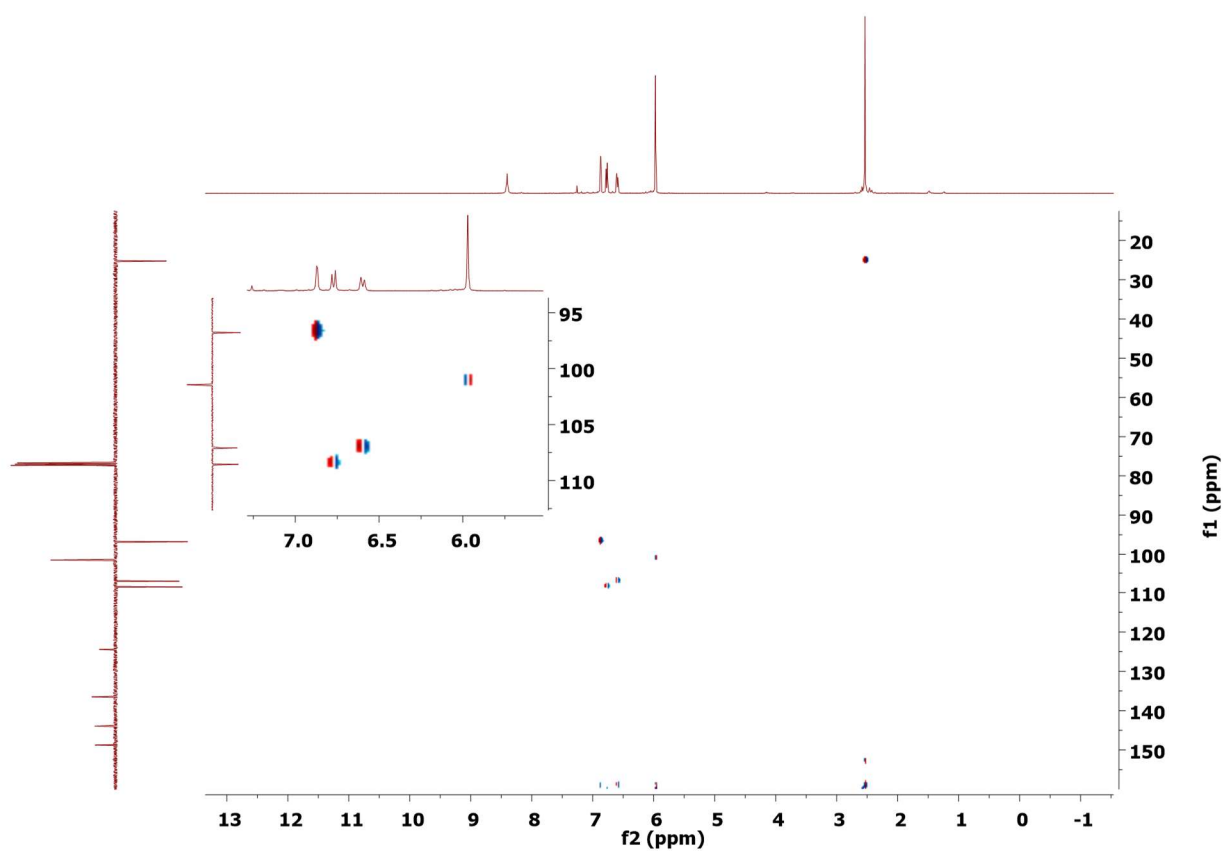

$^1\text{H}$ - $^{13}\text{C}$ -gHMBC NMR ( $\text{CDCl}_3$ ) spectrum of (Z)-N-(benzo[d][1,3]dioxol-5-yl)-2-oxopropanhydrazonoyl chloride

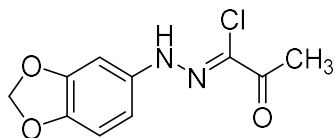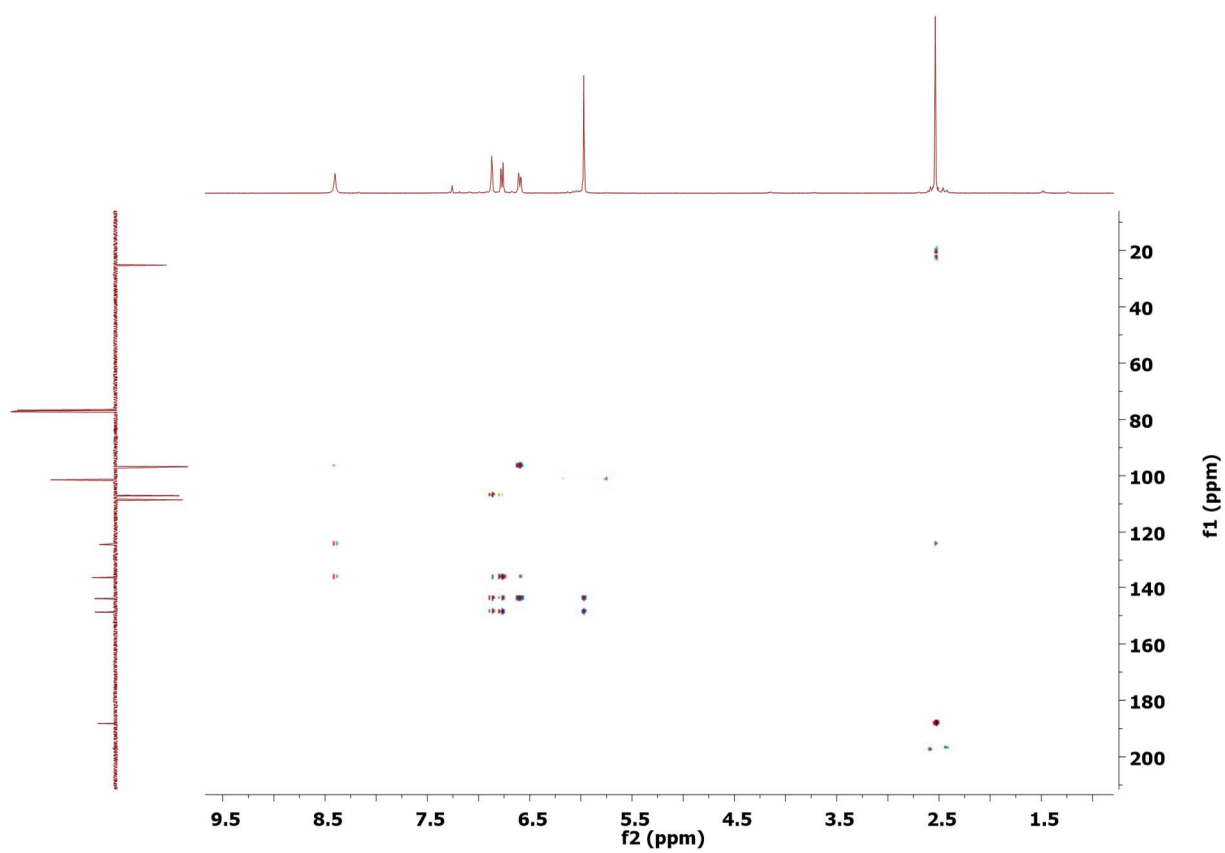

IR spectrum of (Z)-N-(benzo[d][1,3]dioxol-5-yl)-2-chloro-2-propen-1-one

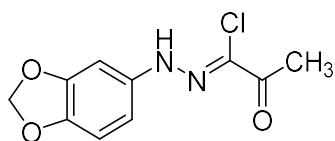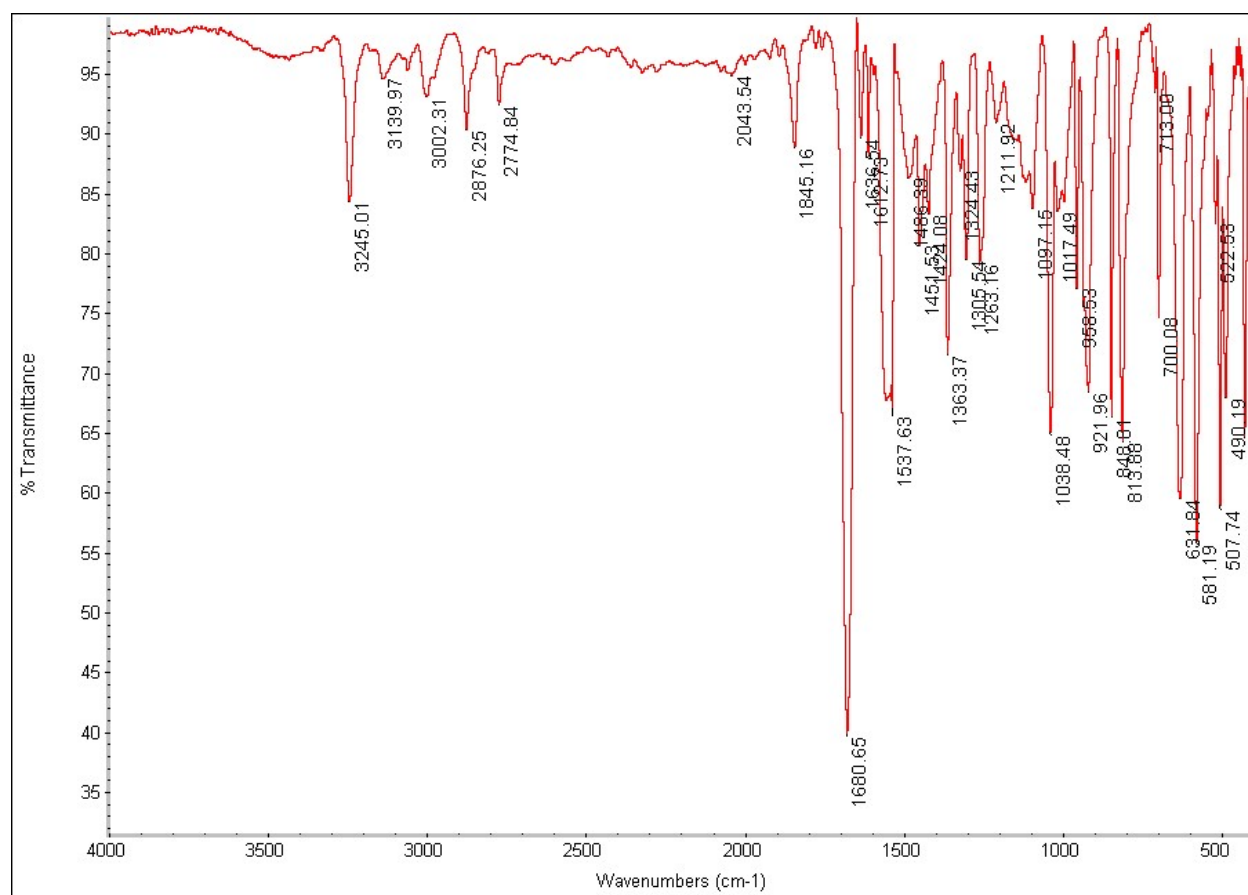

$^1\text{H}$  NMR ( $\text{CDCl}_3$ ) spectrum of (Z)-1-(4-(4-chlorophenyl)-5-((4-chlorophenyl)imino)-4,5-dihydro-1,3,4-thiadiazol-2-yl)ethan-1-one

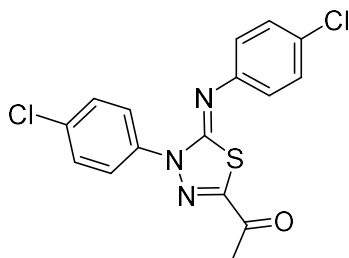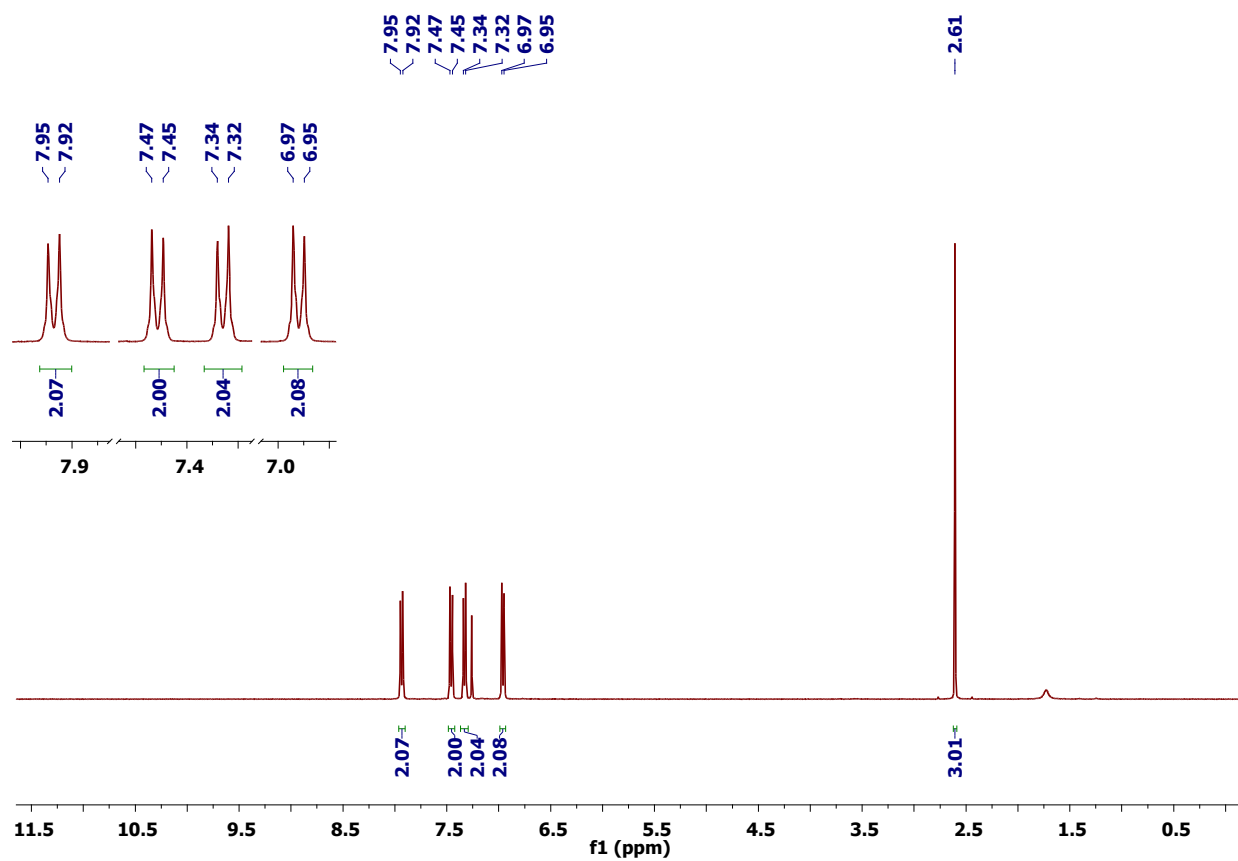

$^{13}\text{C}$  NMR ( $\text{CDCl}_3$ ) spectrum of (Z)-1-(4-(4-chlorophenyl)-5-((4-chlorophenyl)imino)-4,5-dihydro-1,3,4-thiadiazol-2-yl)ethan-1-one

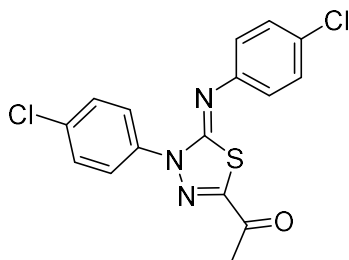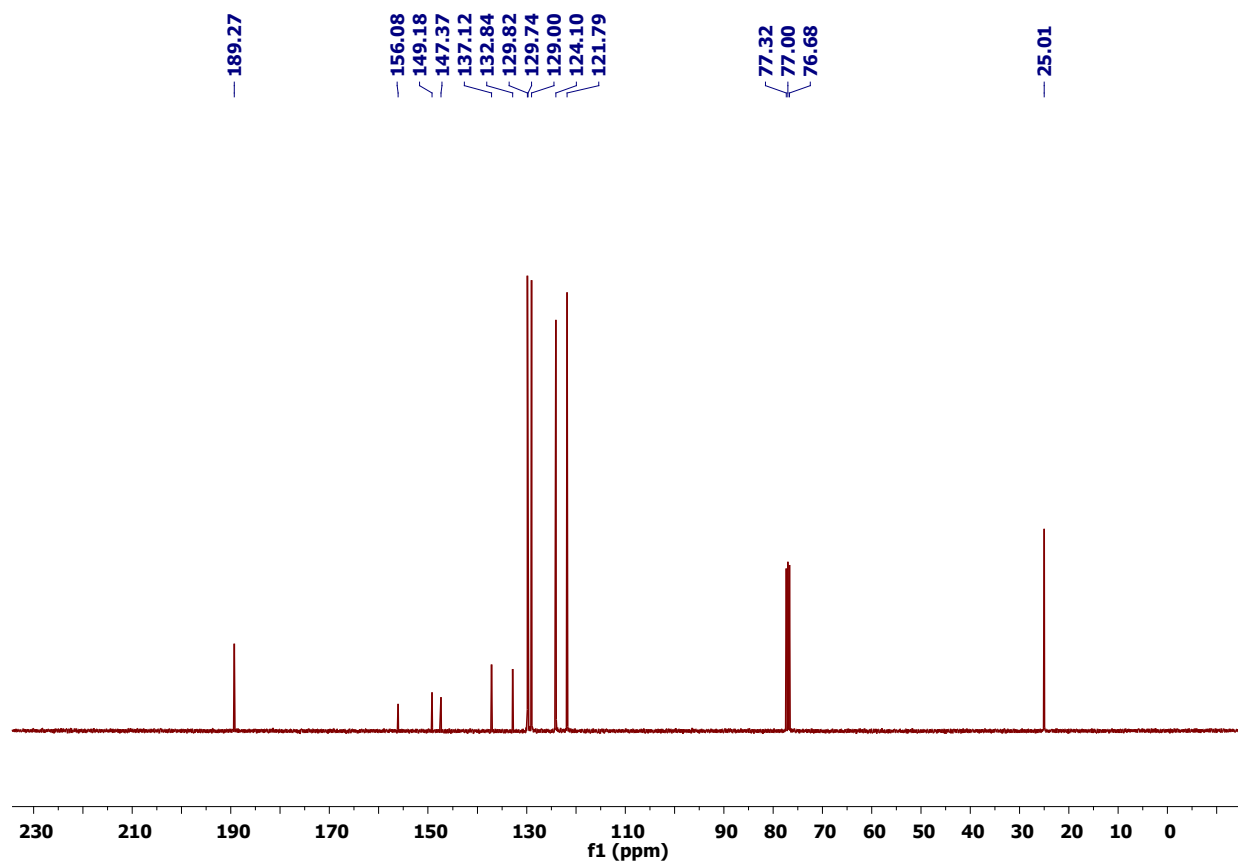

$^{13}\text{C}$  CRAPT NMR ( $\text{CDCl}_3$ ) spectrum of (Z)-1-(4-(4-chlorophenyl)-5-((4-chlorophenyl)imino)-4,5-dihydro-1,3,4-thiadiazol-2-yl)ethan-1-one

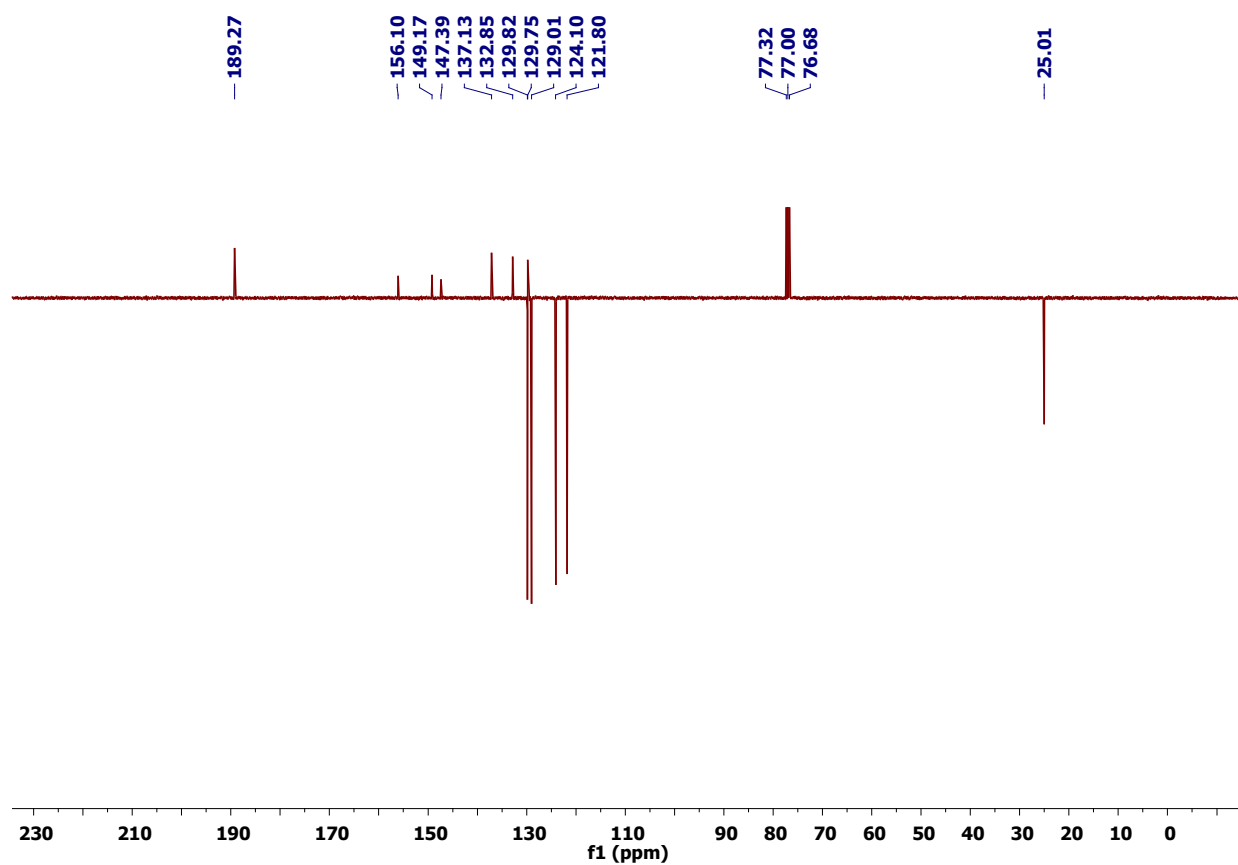



$^1\text{H}$ - $^1\text{H}$  gDQCOSY NMR ( $\text{CDCl}_3$ ) spectrum of (Z)-1-(4-(4-chlorophenyl)imino)-4,5-dihydro-1,3,4-thiadiazol-2-yl)ethan-1-one

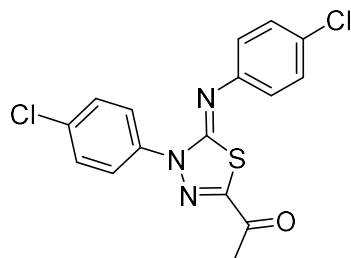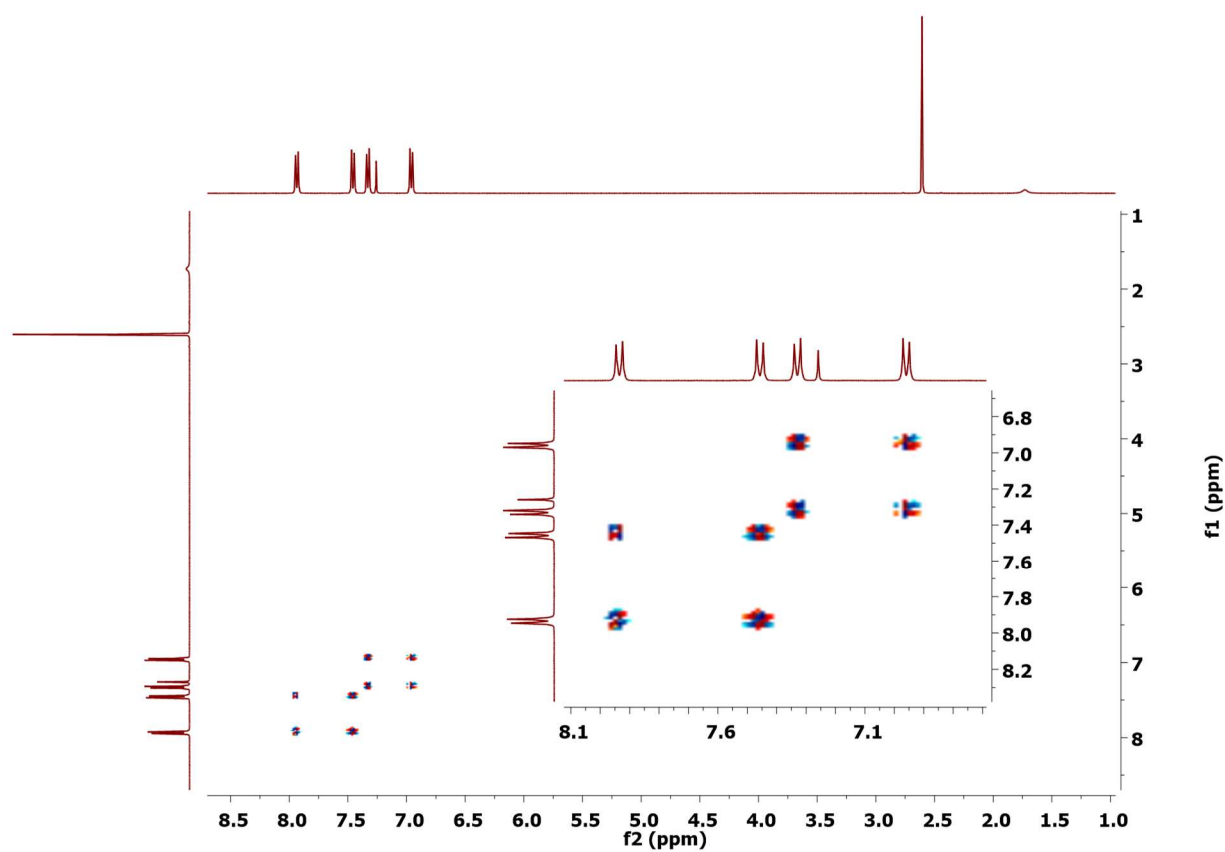

$^1\text{H}$ - $^{13}\text{C}$ -HSQC NMR ( $\text{CDCl}_3$ ) spectrum of (Z)-1-(4-(4-chlorophenyl)-5-((4-chlorophenyl)imino)-4,5-dihydro-1,3,4-thiadiazol-2-yl)ethan-1-one

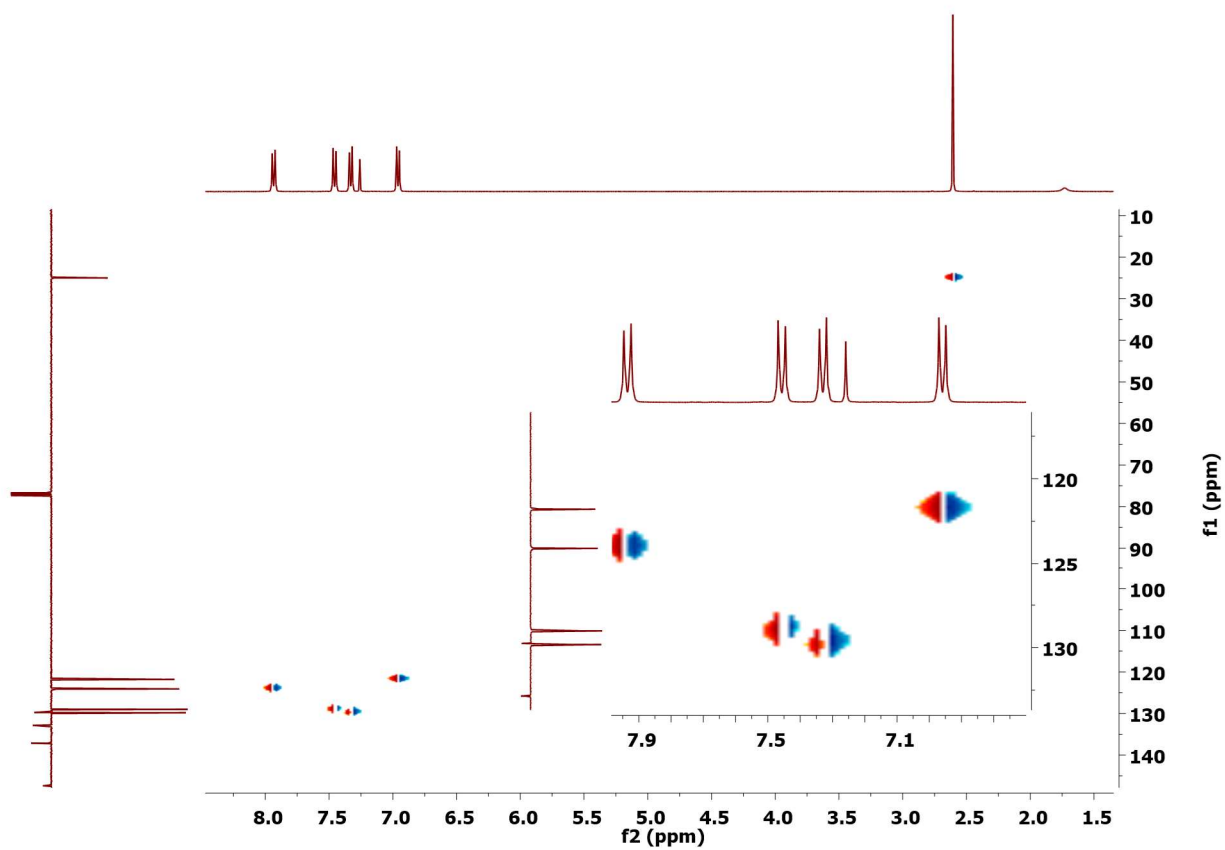

$^1\text{H}$ - $^{13}\text{C}$ -gHMBC NMR ( $\text{CDCl}_3$ ) spectrum of (Z)-1-(4-(4-chlorophenyl)-5-((4-chlorophenyl)imino)-4,5-dihydro-1,3,4-thiadiazol-2-yl)ethan-1-one

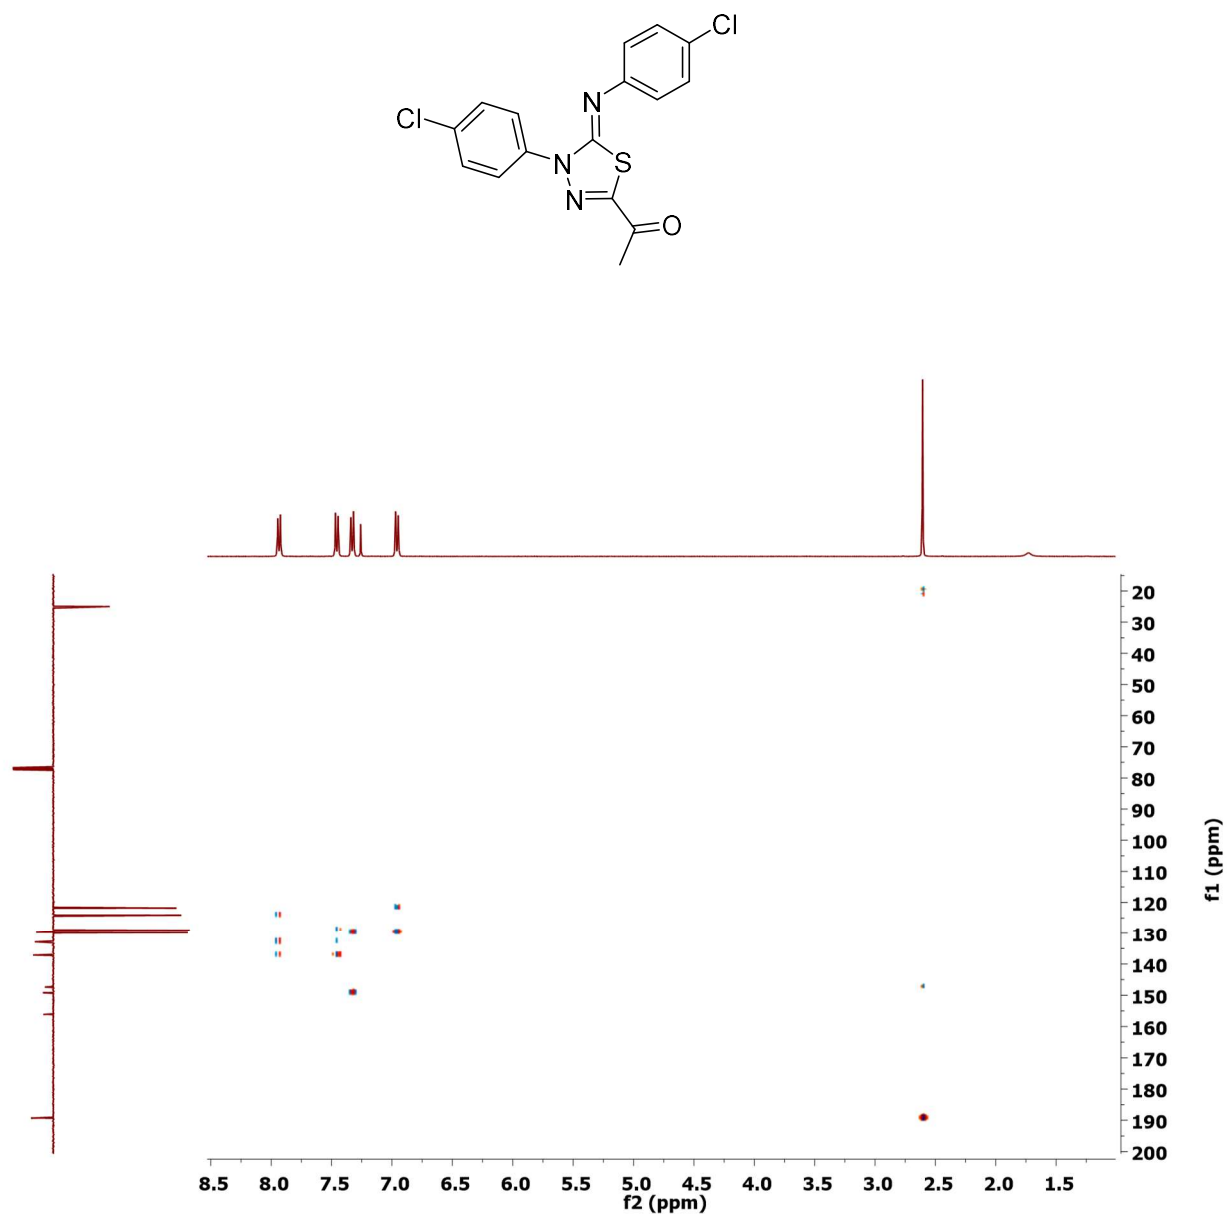

$^1\text{H}$  NMR ( $\text{CDCl}_3$ ) spectrum of (Z)-1-(4-(4-bromophenyl)-5-((4-bromophenyl)imino)-4,5-dihydro-1,3,4-thiadiazol-2-yl)ethan-1-one

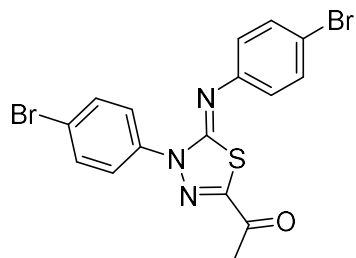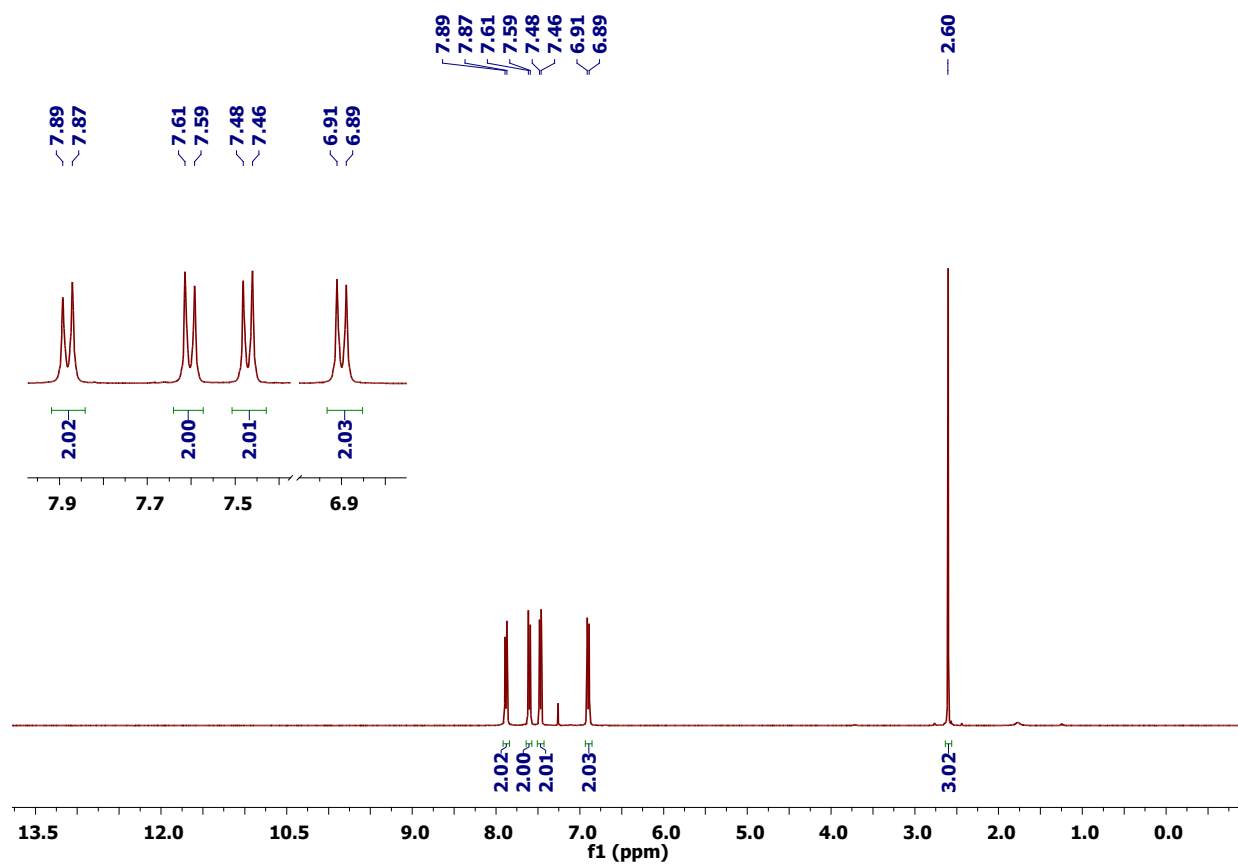

$^{13}\text{C}$  NMR ( $\text{CDCl}_3$ ) spectrum of (Z)-1-(4-(4-bromophenyl)-5-((4-bromophenyl)imino)-4,5-dihydro-1,3,4-thiadiazol-2-yl)ethan-1-one

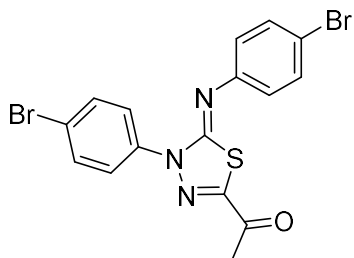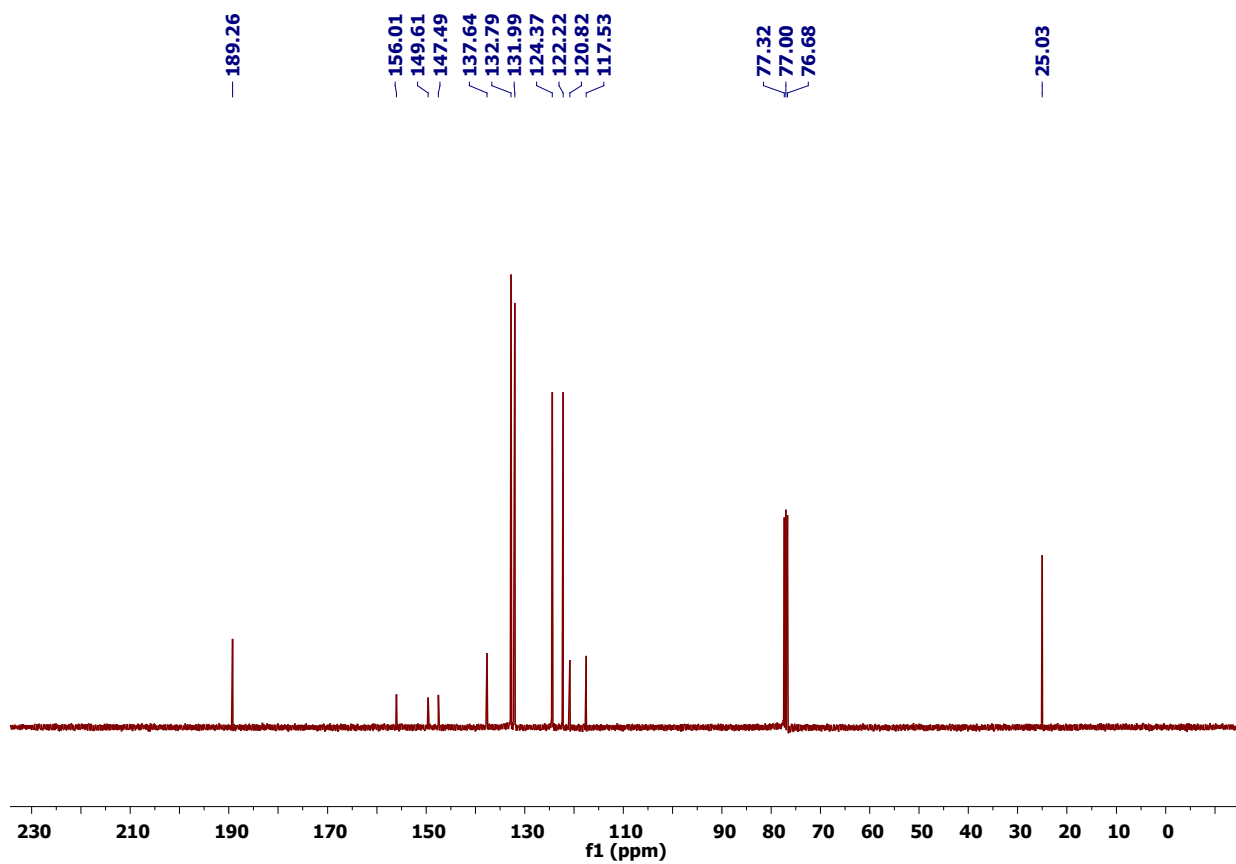

$^{13}\text{C}$  CRAPT NMR ( $\text{CDCl}_3$ ) spectrum of (Z)-1-(4-(4-bromophenyl)-5-((4-bromophenyl)imino)-4,5-dihydro-1,3,4-thiadiazol-2-yl)ethan-1-one

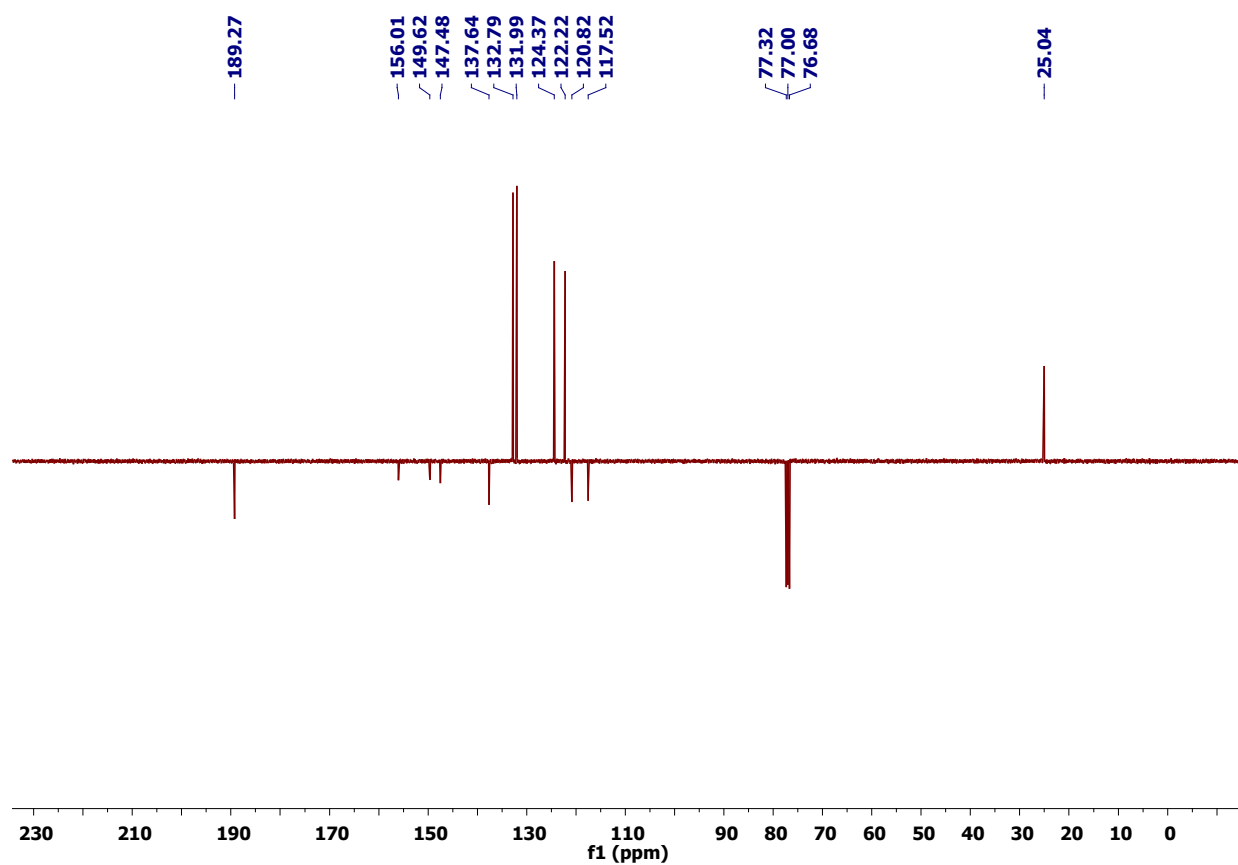

$^1\text{H}$ - $^1\text{H}$  gDQCOSY NMR ( $\text{CDCl}_3$ ) spectrum of (Z)-1-(4-(4-bromophenyl)-5-((4-bromophenyl)imino)-4,5-dihydro-1,3,4-thiadiazol-2-yl)ethan-1-one

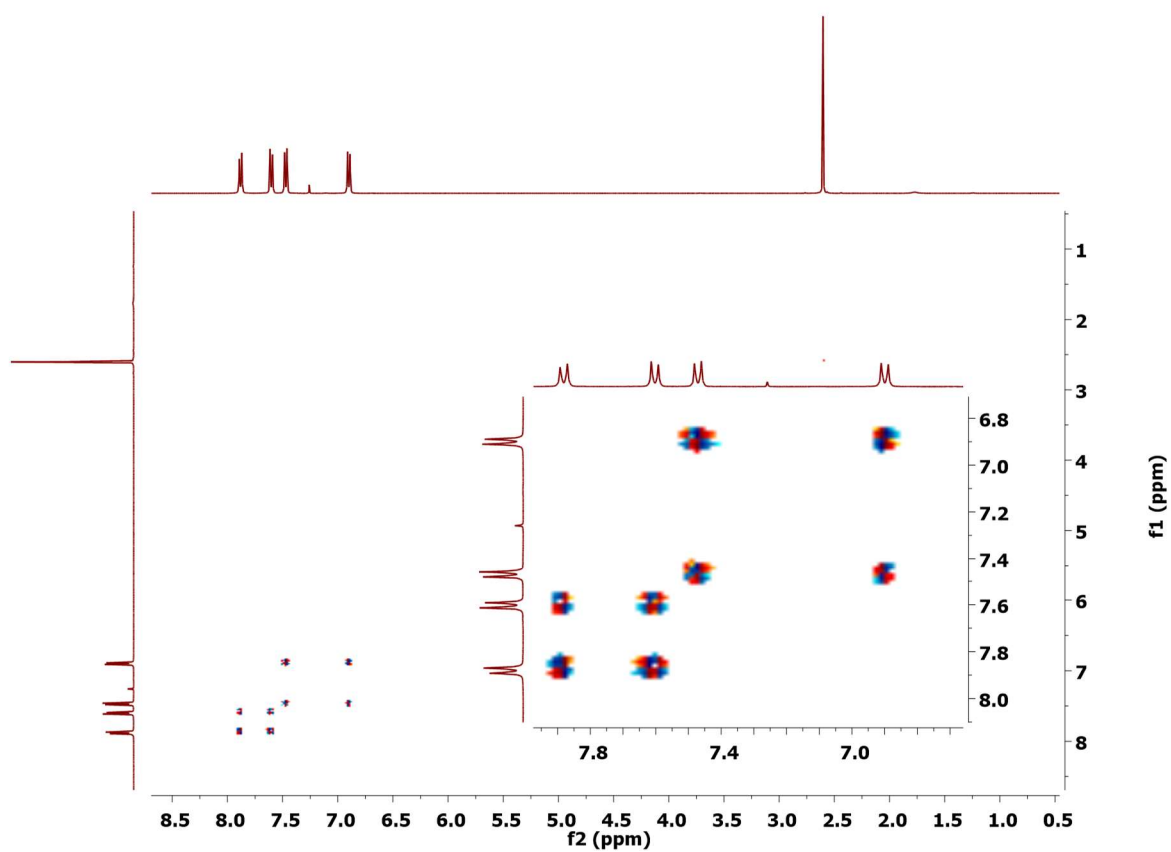

$^1\text{H}$ - $^{13}\text{C}$ -HSQC NMR ( $\text{CDCl}_3$ ) spectrum of (Z)-1-(4-(4-bromophenyl)-5-((4-bromophenyl)imino)-4,5-dihydro-1,3,4-thiadiazol-2-yl)ethan-1-one

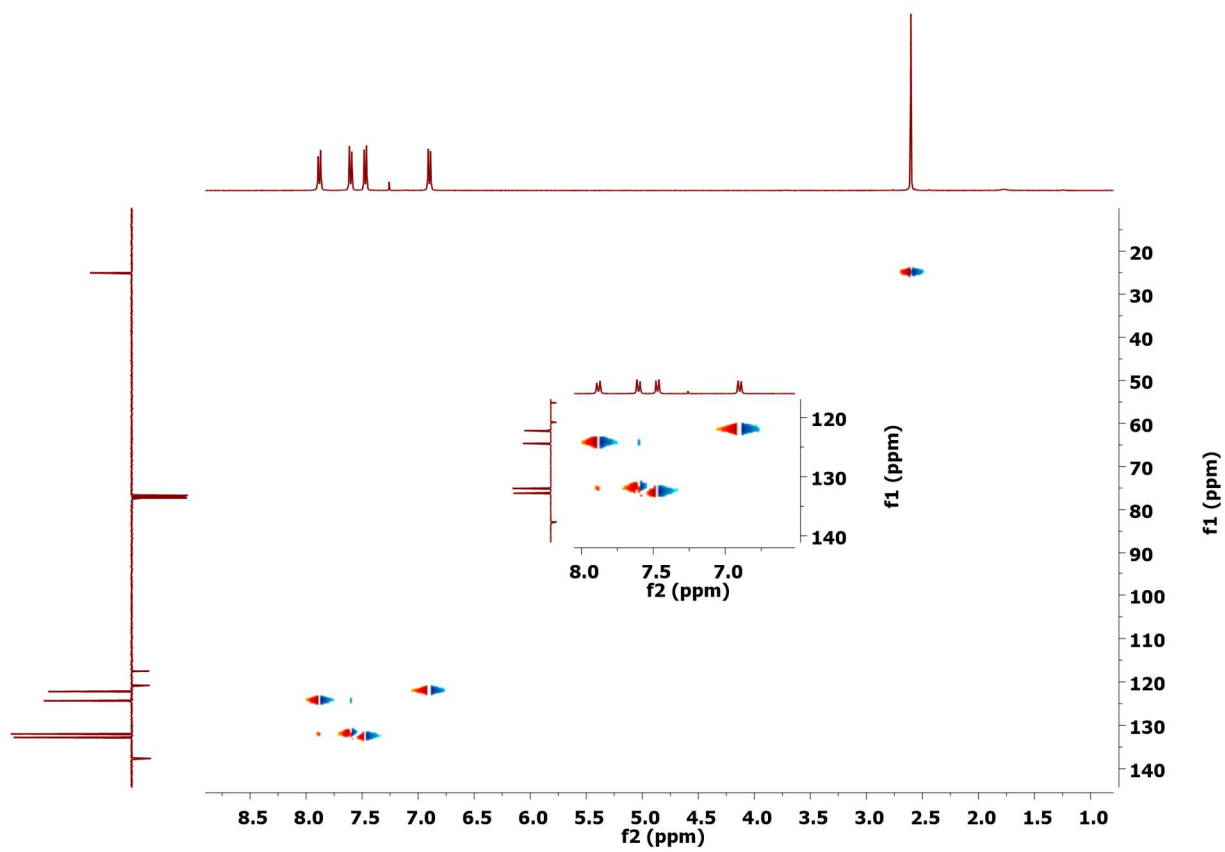



$^1\text{H}$ - $^{13}\text{C}$ -gHMBC NMR ( $\text{CDCl}_3$ ) spectrum of (Z)-1-(4-(4-bromophenyl)-5-((4-bromophenyl)imino)-4,5-dihydro-1,3,4-thiadiazol-2-yl)ethan-1-one

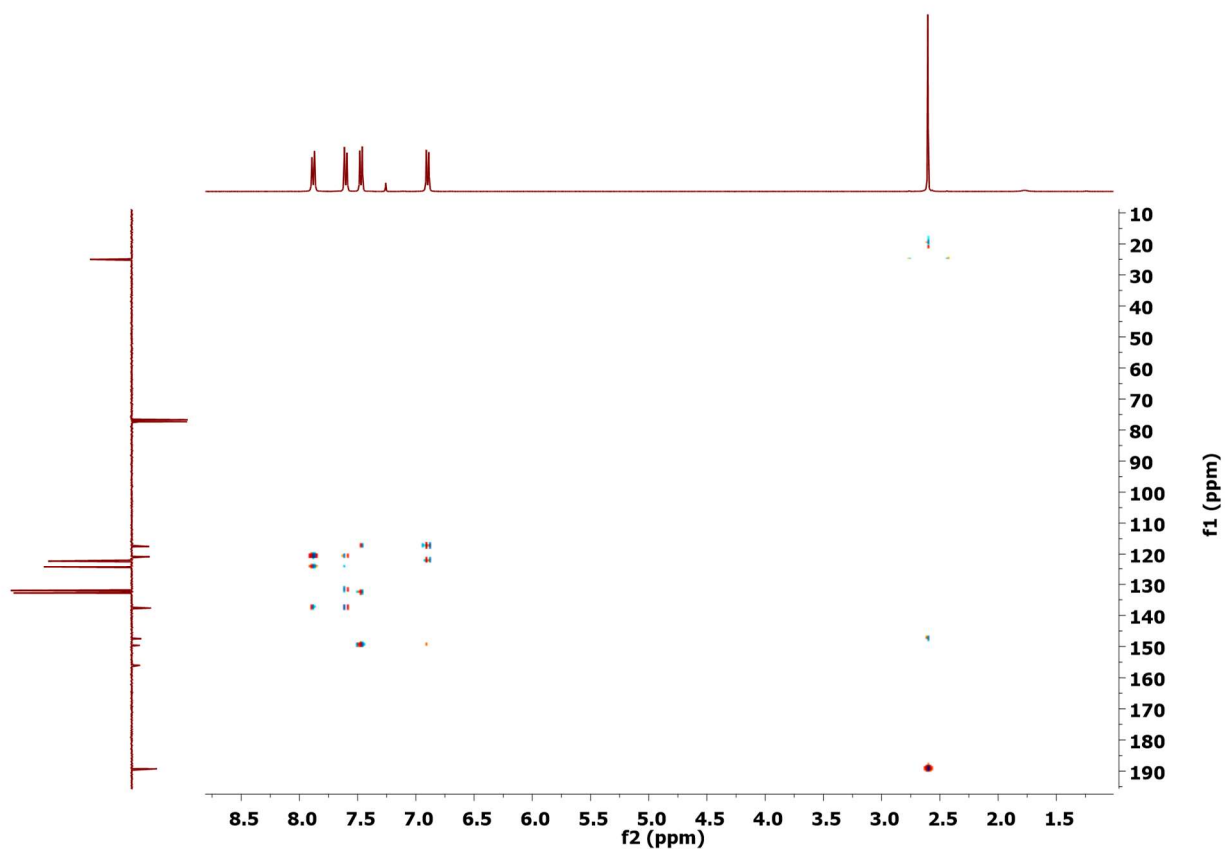

$^1\text{H}$  NMR ( $\text{CDCl}_3$ ) spectrum of (Z)-1-(4-(4-iodophenyl)-5-((4-iodophenyl)imino)-4,5-dihydro-1,3,4-thiadiazol-2-yl)ethan-1-one

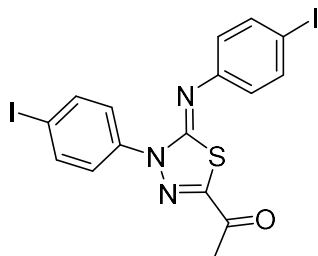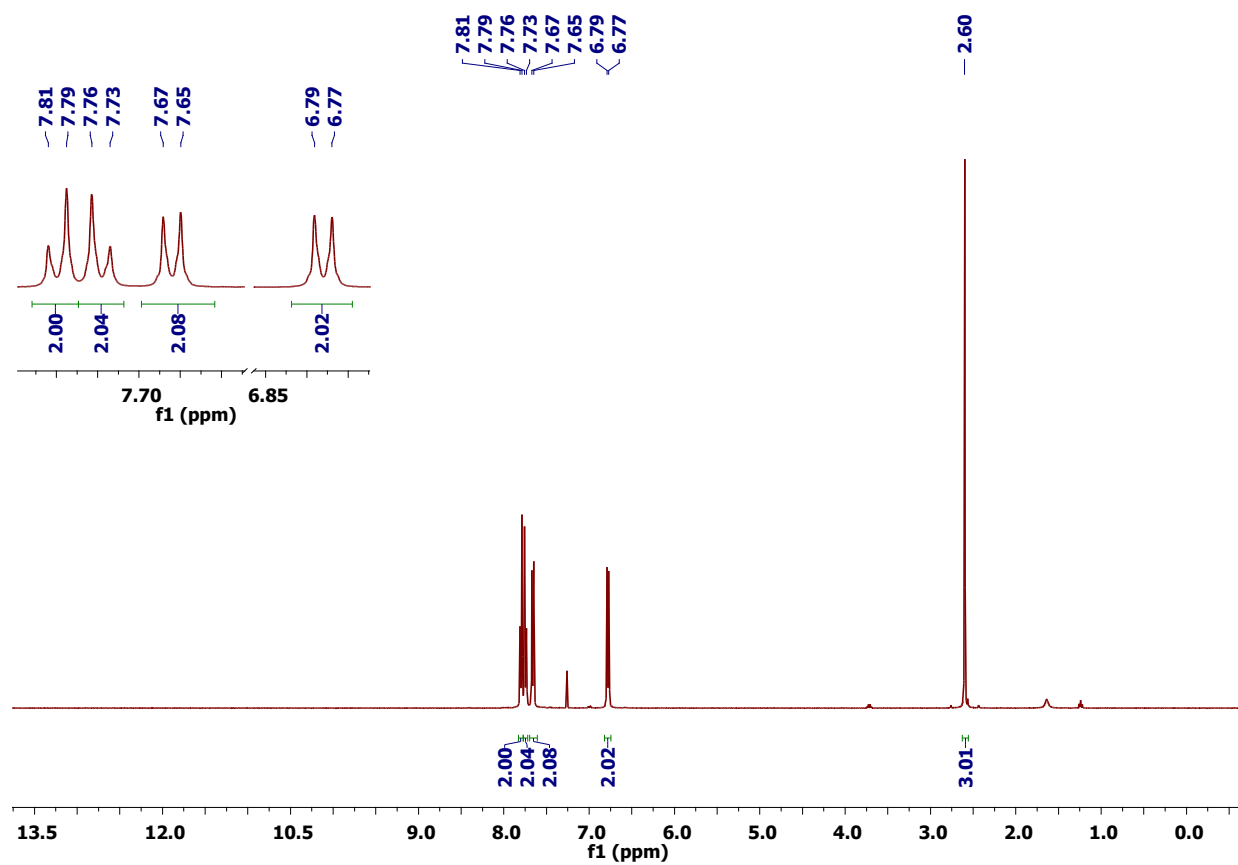

$^{13}\text{C}$  NMR ( $\text{CDCl}_3$ ) spectrum of (Z)-1-(4-(4-iodophenyl)-5-((4-iodophenyl)imino)-4,5-dihydro-1,3,4-thiadiazol-2-yl)ethan-1-one

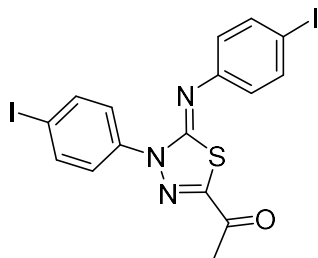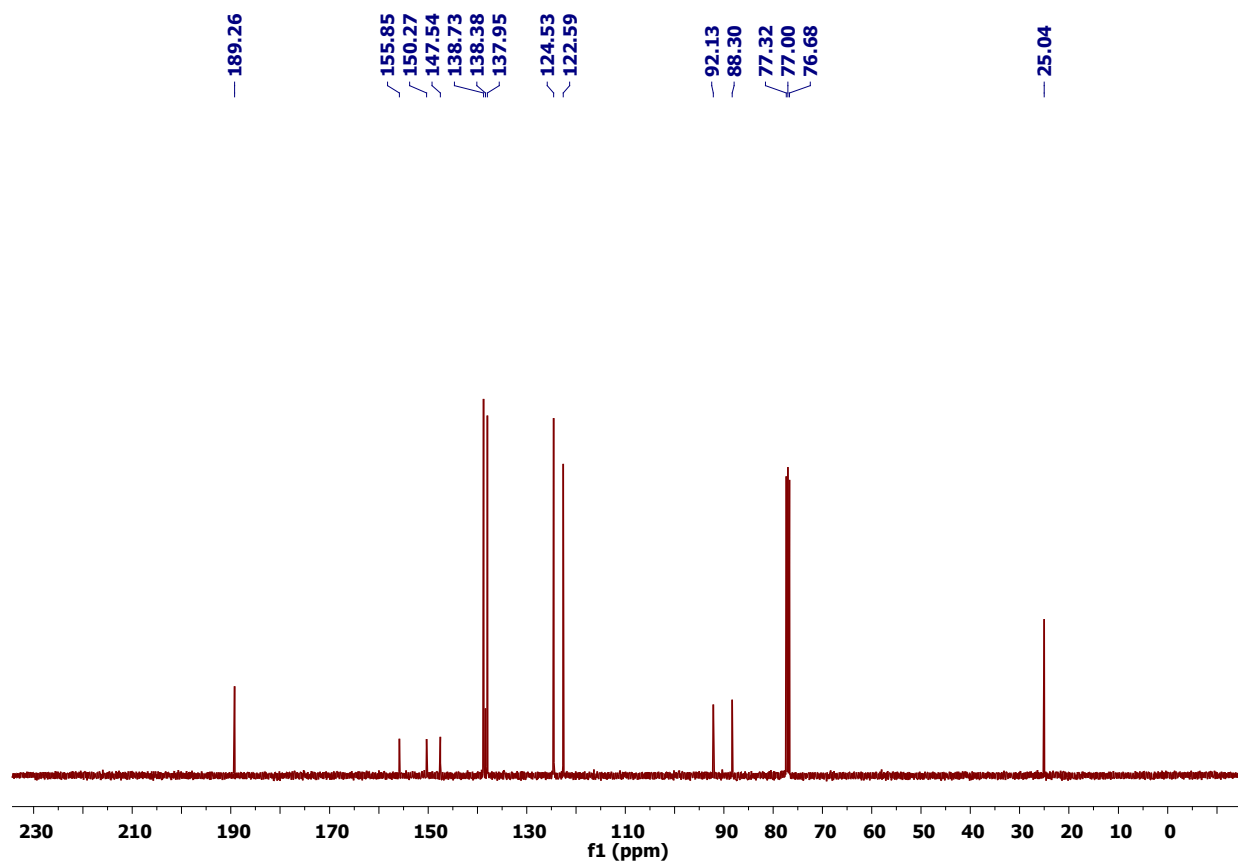

$^{13}\text{C}$  CRAPT NMR ( $\text{CDCl}_3$ ) spectrum of (Z)-1-(4-(4-iodophenyl)-5-((4-iodophenyl)imino)-4,5-dihydro-1,3,4-thiadiazol-2-yl)ethan-1-one

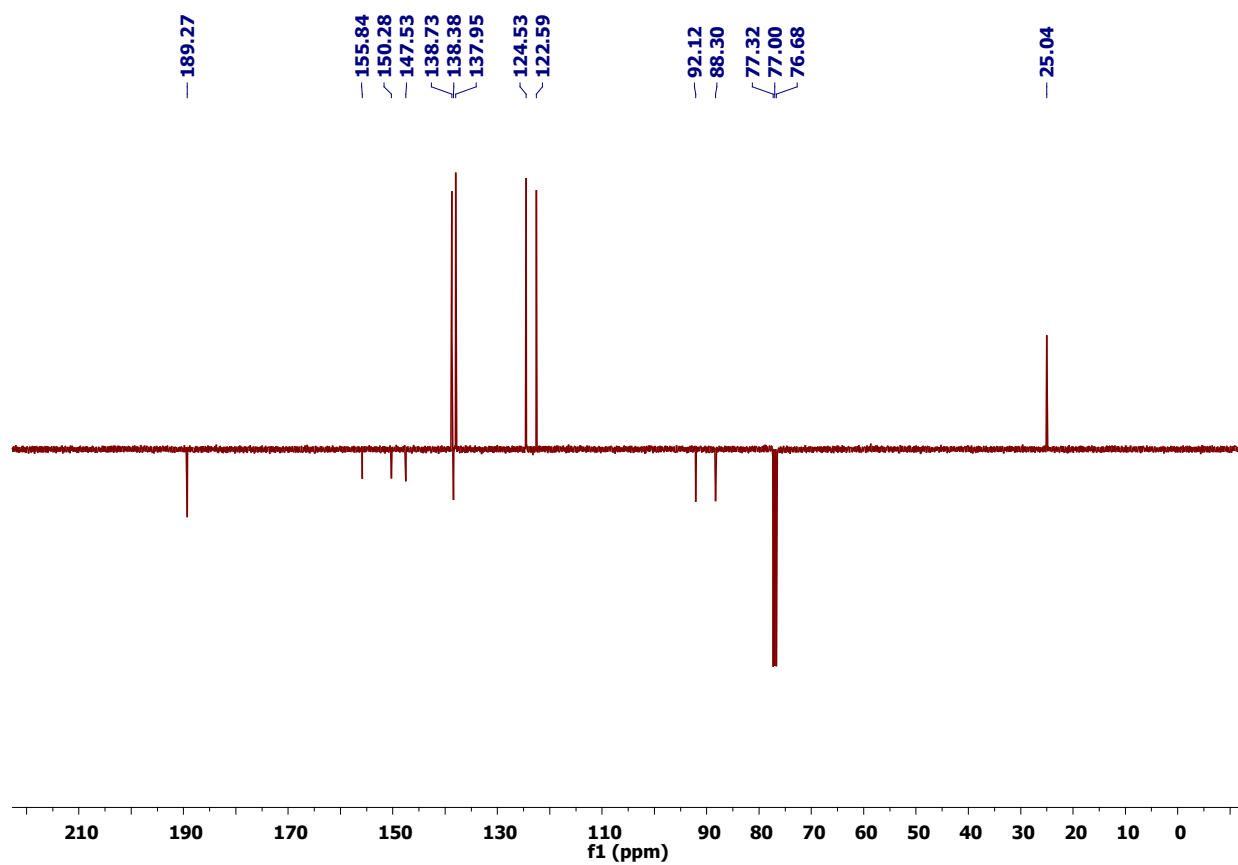

$^1\text{H}$ - $^1\text{H}$  gDQCOSY NMR ( $\text{CDCl}_3$ ) spectrum of (Z)-1-(4-(4-iodophenyl)-5-((4-iodophenyl)imino)-4,5-dihydro-1,3,4-thiadiazol-2-yl)ethan-1-one

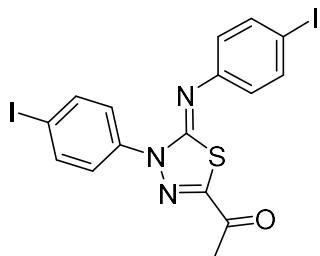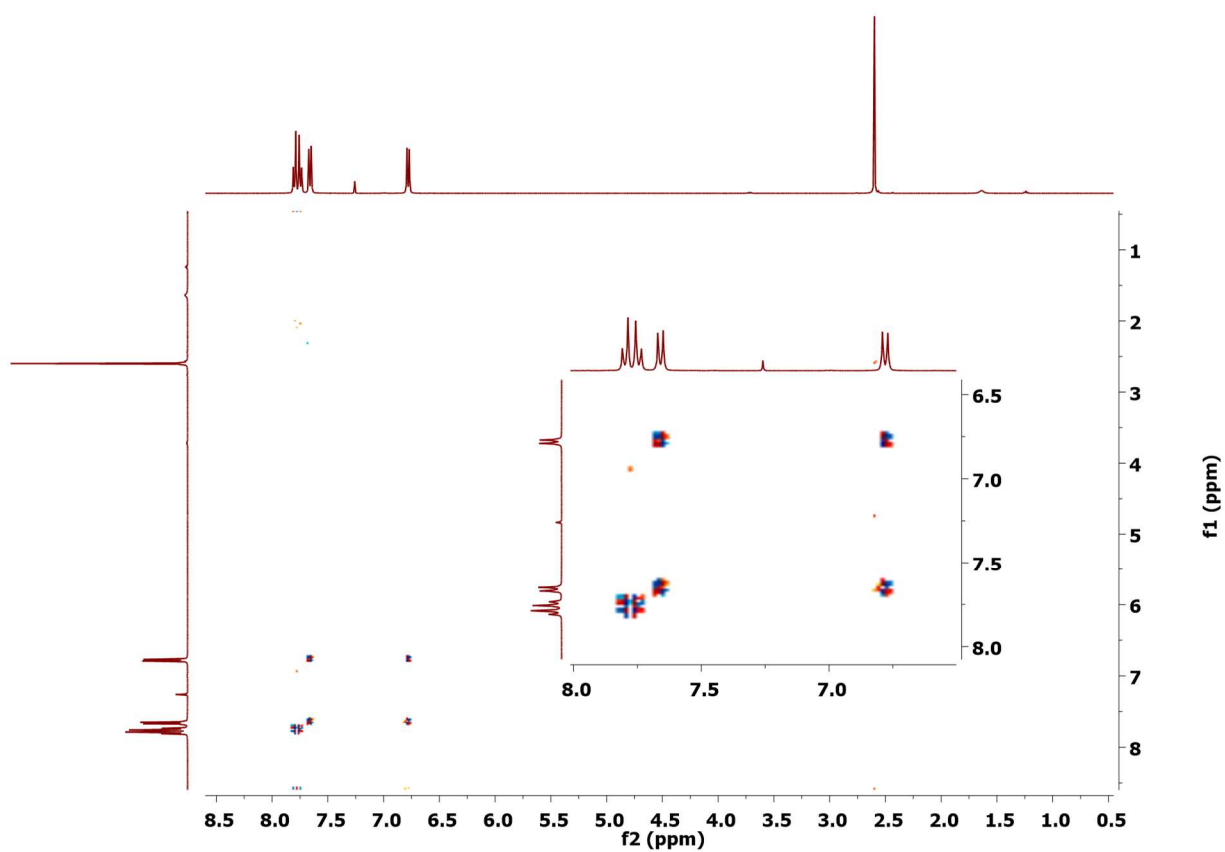

$^1\text{H}$ - $^{13}\text{C}$ -HSQC NMR ( $\text{CDCl}_3$ ) spectrum of (Z)-1-(4-(4-iodophenyl)-5-((4-iodophenyl)imino)-4,5-dihydro-1,3,4-thiadiazol-2-yl)ethan-1-one

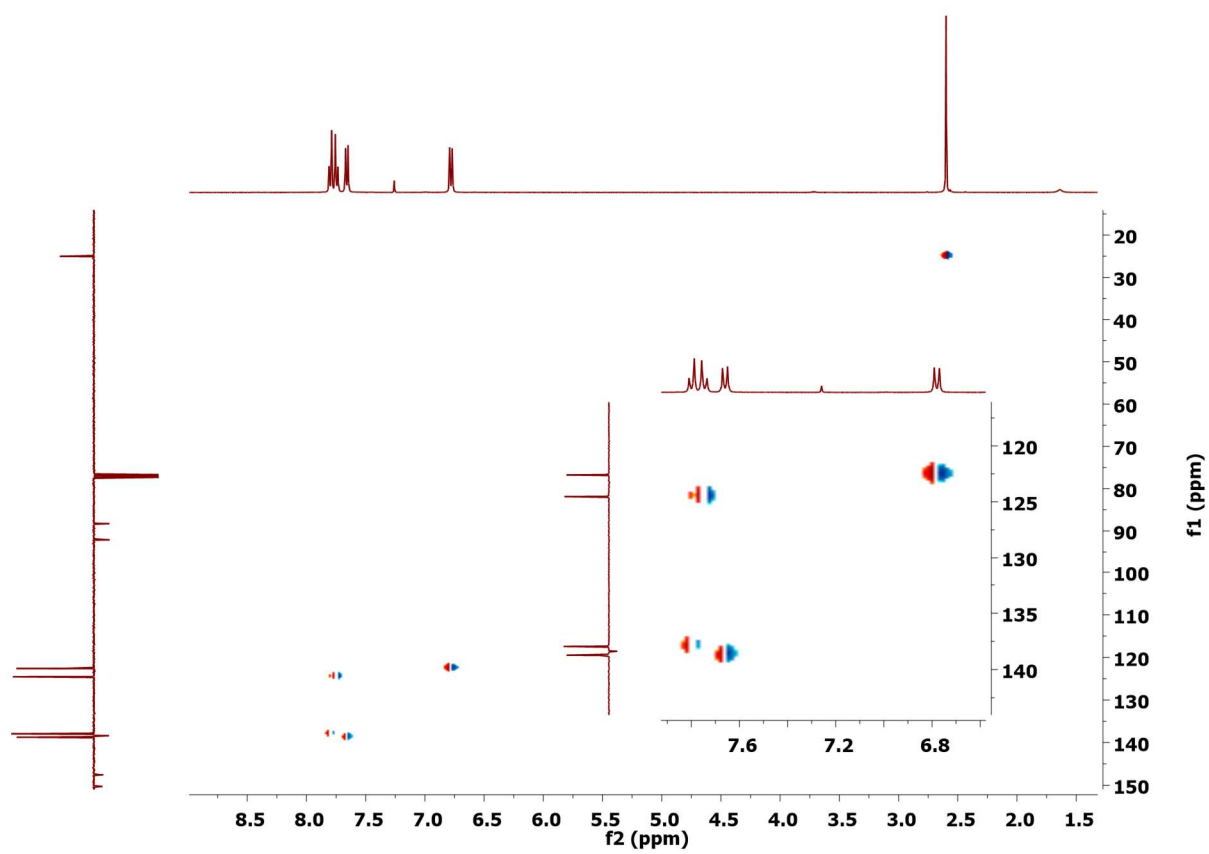

$^1\text{H}$ - $^{13}\text{C}$ -gHMBC NMR ( $\text{CDCl}_3$ ) spectrum of (Z)-1-(4-(4-iodophenyl)-5-((4-iodophenyl)imino)-4,5-dihydro-1,3,4-thiadiazol-2-yl)ethan-1-one

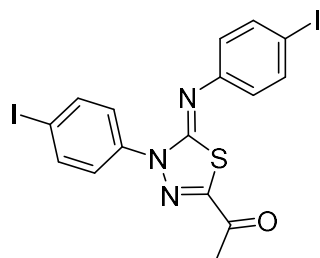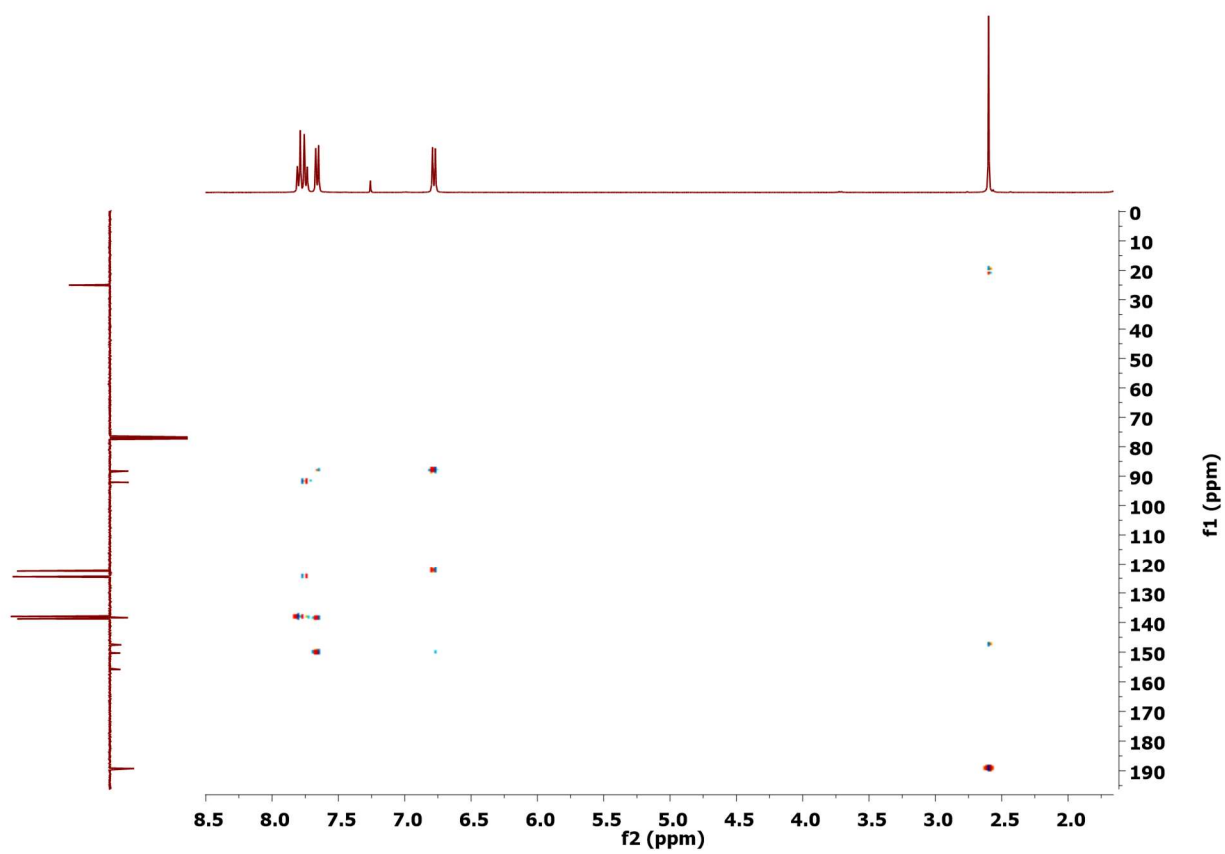

$^1\text{H}$  NMR ( $\text{CDCl}_3$ ) spectrum of (Z)-1-(4-(4-iodophenyl)-5-((4-methoxyphenyl)imino)-4,5-dihydro-1,3,4-thiadiazol-2-yl)ethan-1-one

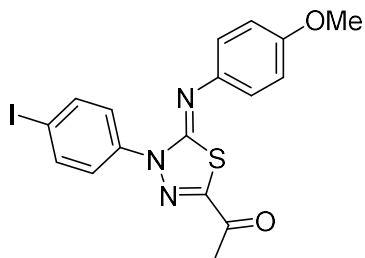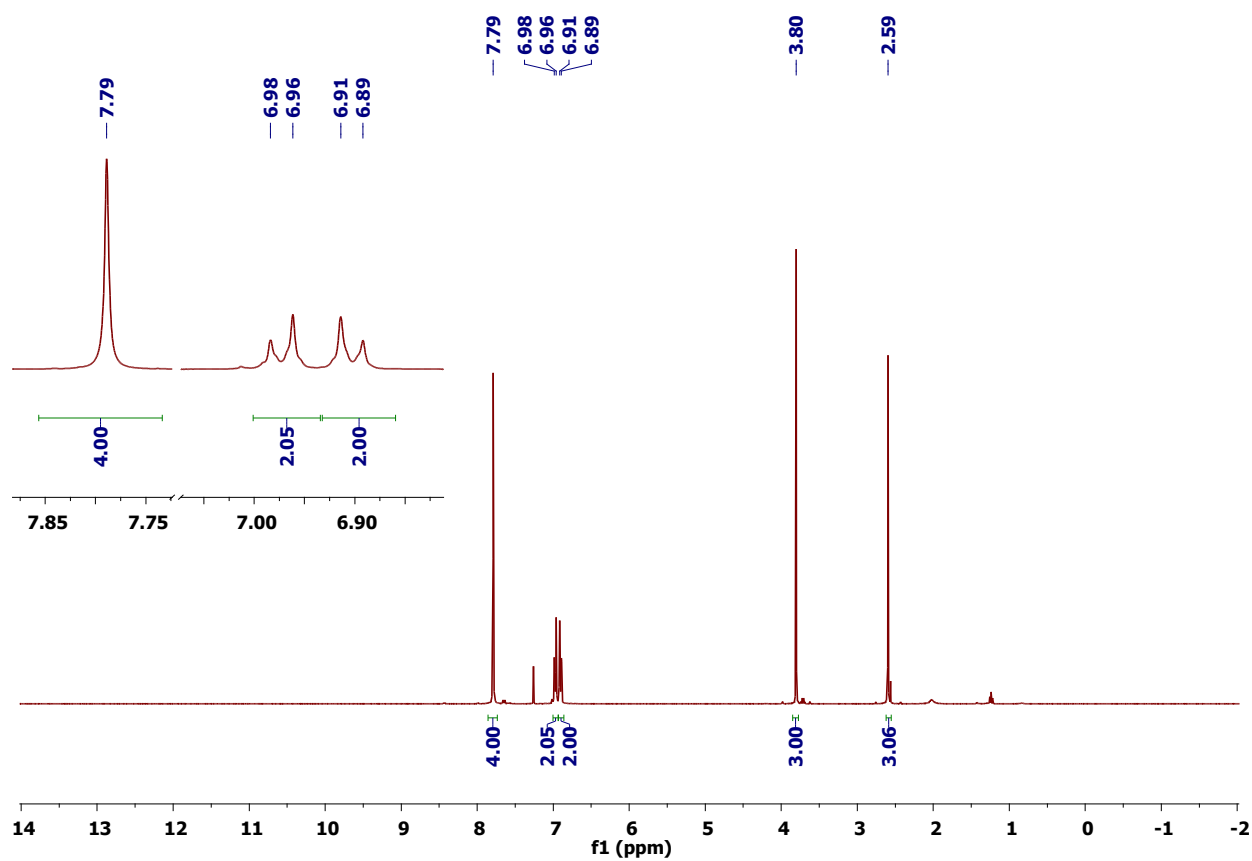



$^{13}\text{C}$  NMR ( $\text{CDCl}_3$ ) spectrum of (Z)-1-(4-(4-iodophenyl)-5-((4-methoxyphenyl)imino)-4,5-dihydro-1,3,4-thiadiazol-2-yl)ethan-1-one

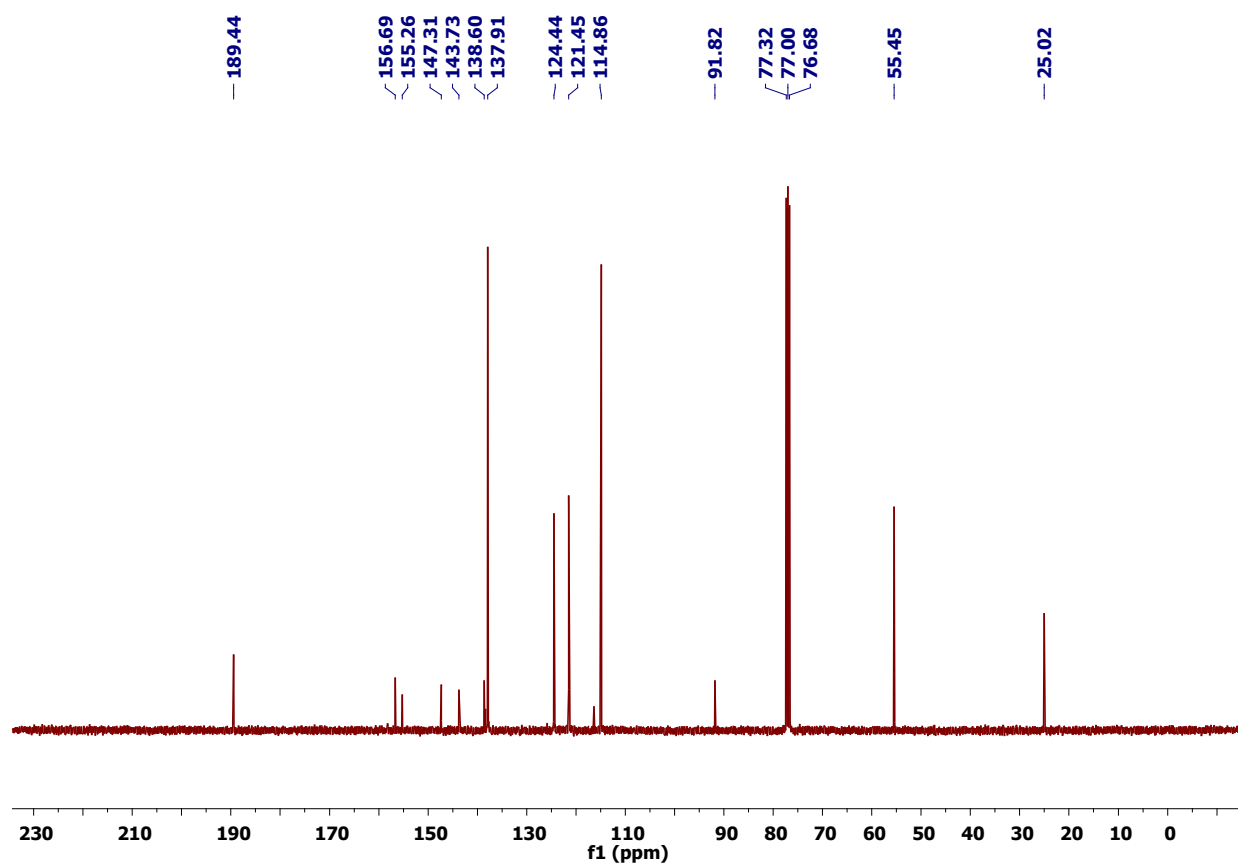

$^{13}\text{C}$  CRAPT NMR ( $\text{CDCl}_3$ ) spectrum of (Z)-1-(4-(4-iodophenyl)-5-((4-methoxyphenyl)imino)-4,5-dihydro-1,3,4-thiadiazol-2-yl)ethan-1-one

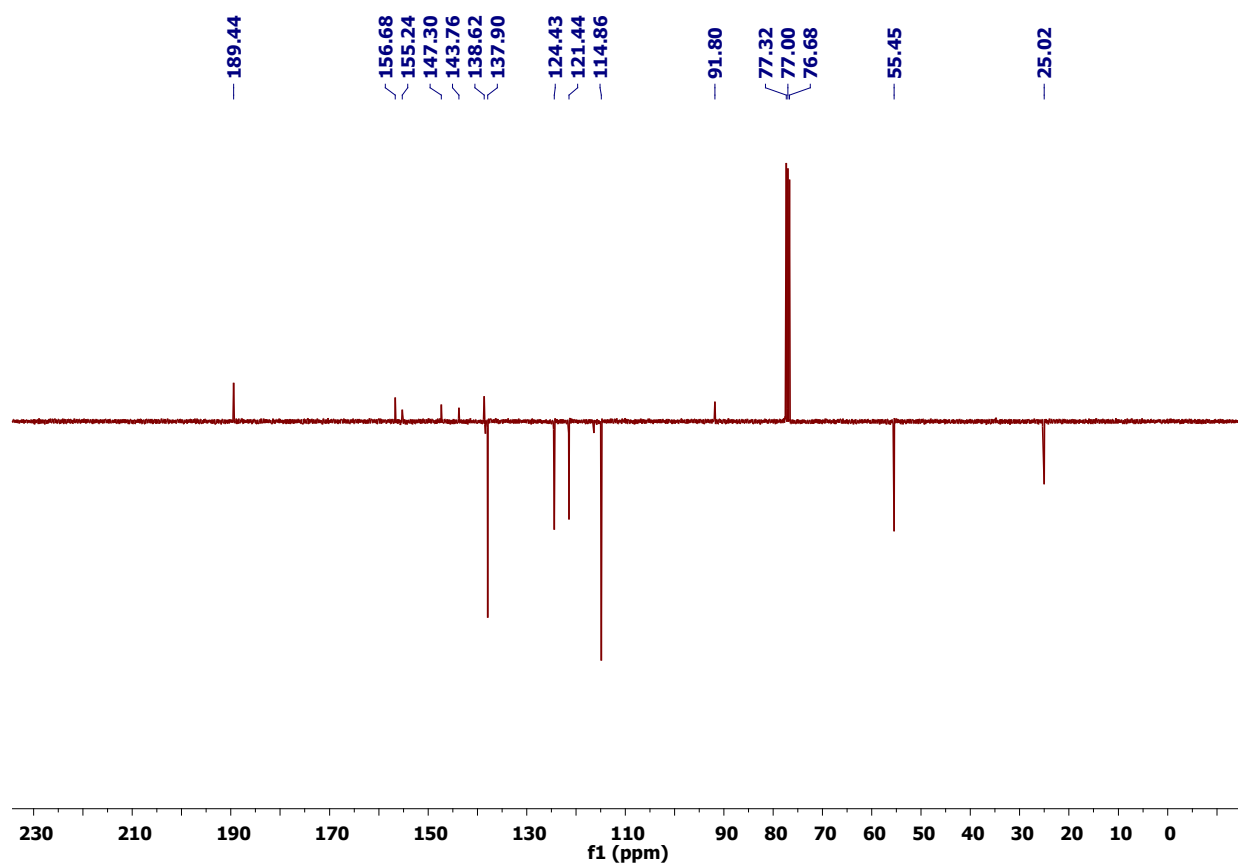

$^1\text{H}$ - $^1\text{H}$  gDQCOSY NMR ( $\text{CDCl}_3$ ) spectrum of (Z)-1-(4-(4-iodophenyl)-5-((4-methoxyphenyl)imino)-4,5-dihydro-1,3,4-thiadiazol-2-yl)ethan-1-one

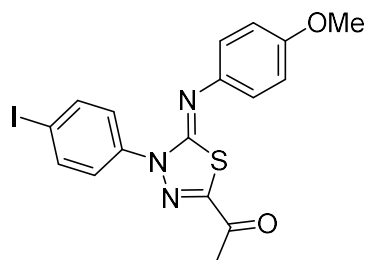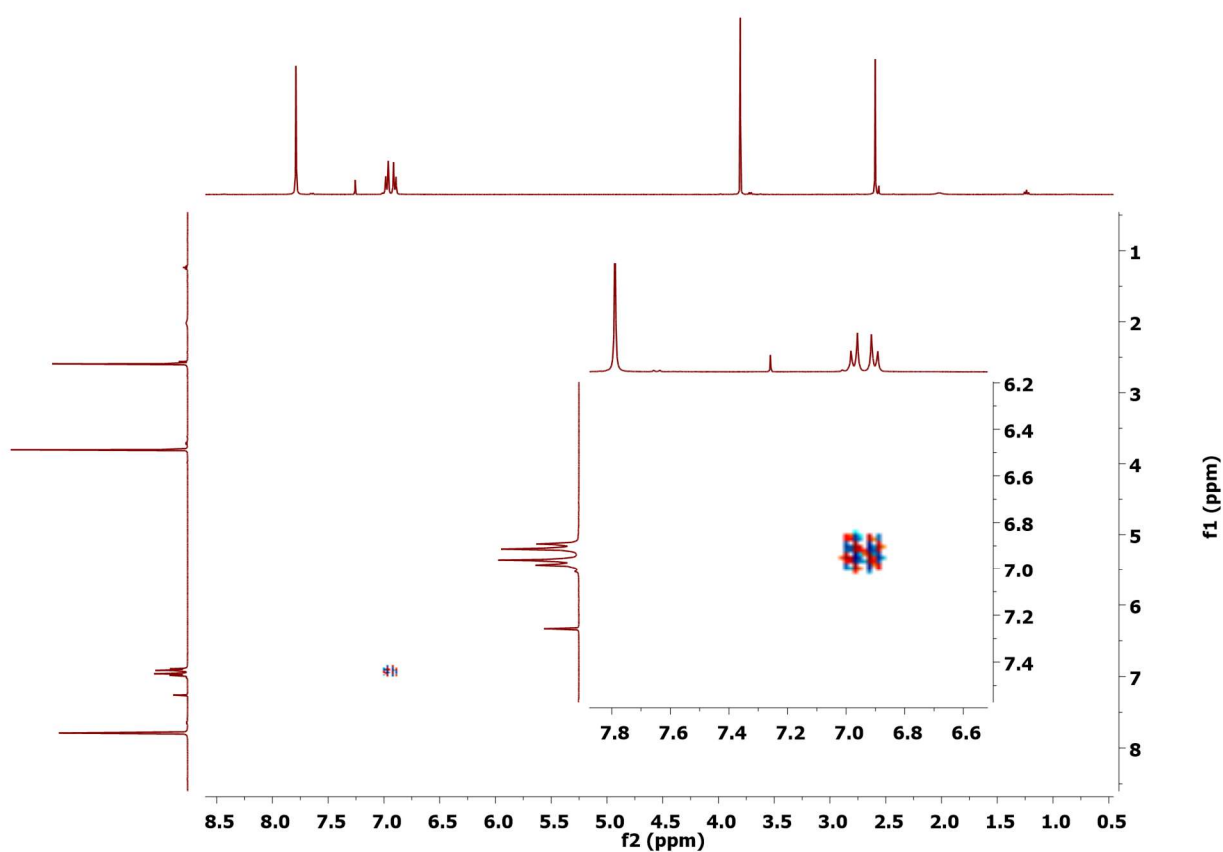

$^1\text{H}$ - $^{13}\text{C}$ -HSQC NMR ( $\text{CDCl}_3$ ) spectrum of (Z)-1-(4-(4-iodophenyl)-5-((4-methoxyphenyl)imino)-4,5-dihydro-1,3,4-thiadiazol-2-yl)ethan-1-one

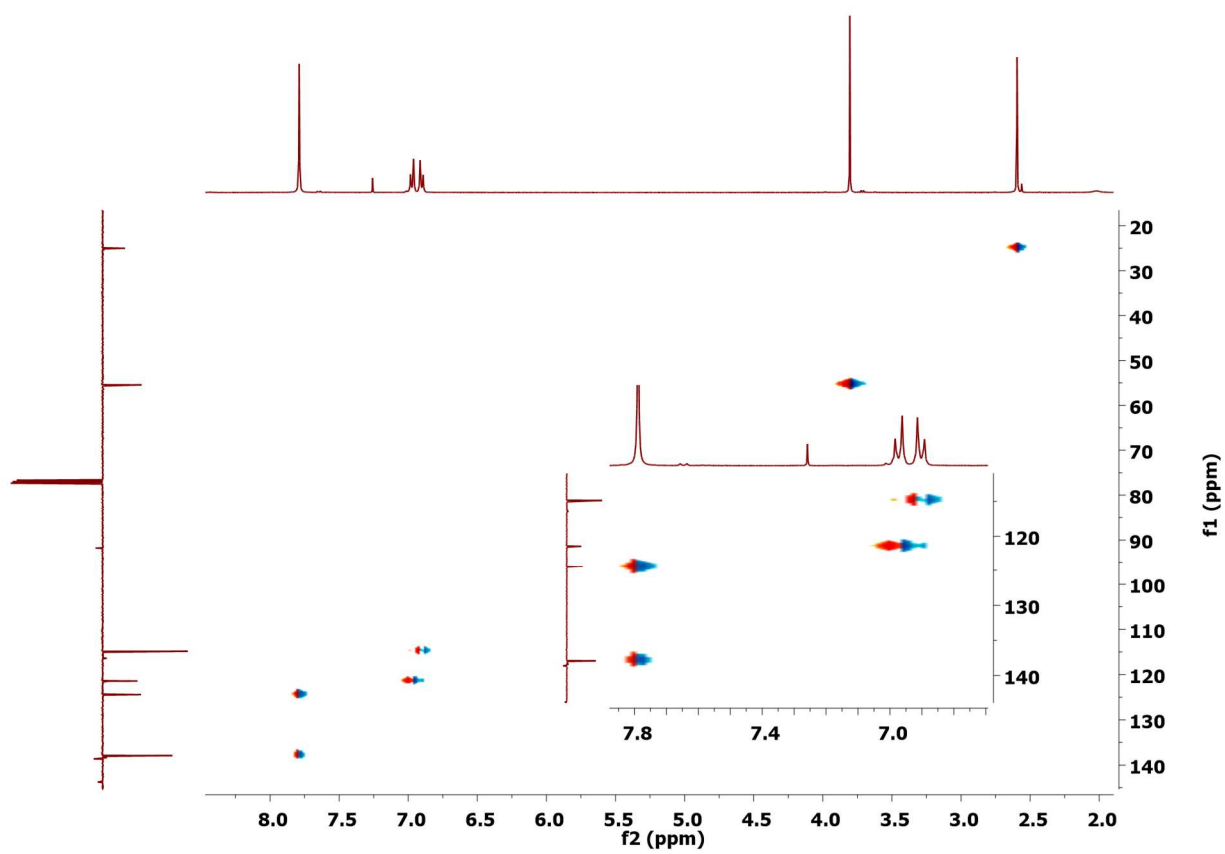

$^1\text{H}$ - $^{13}\text{C}$ -gHMBC NMR ( $\text{CDCl}_3$ ) spectrum of (Z)-1-(4-(4-iodophenyl)-5-((4-methoxyphenyl)imino)-4,5-dihydro-1,3,4-thiadiazol-2-yl)ethan-1-one

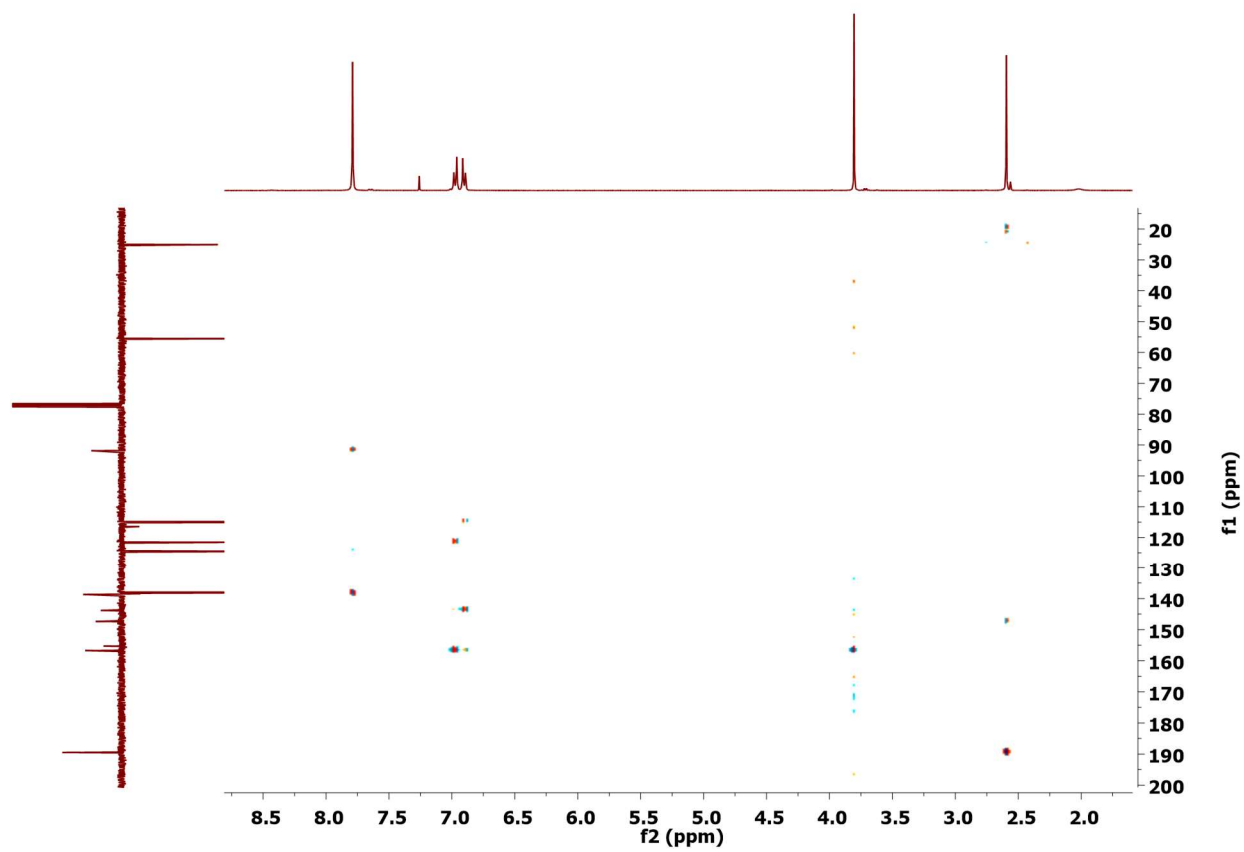

$^1\text{H}$  NMR ( $\text{CDCl}_3$ ) spectrum of (Z)-1-(4-(4-iodophenyl)-5-((4-methoxyphenyl)imino)-4,5-dihydro-1,3,4-thiadiazol-2-yl)ethan-1-one

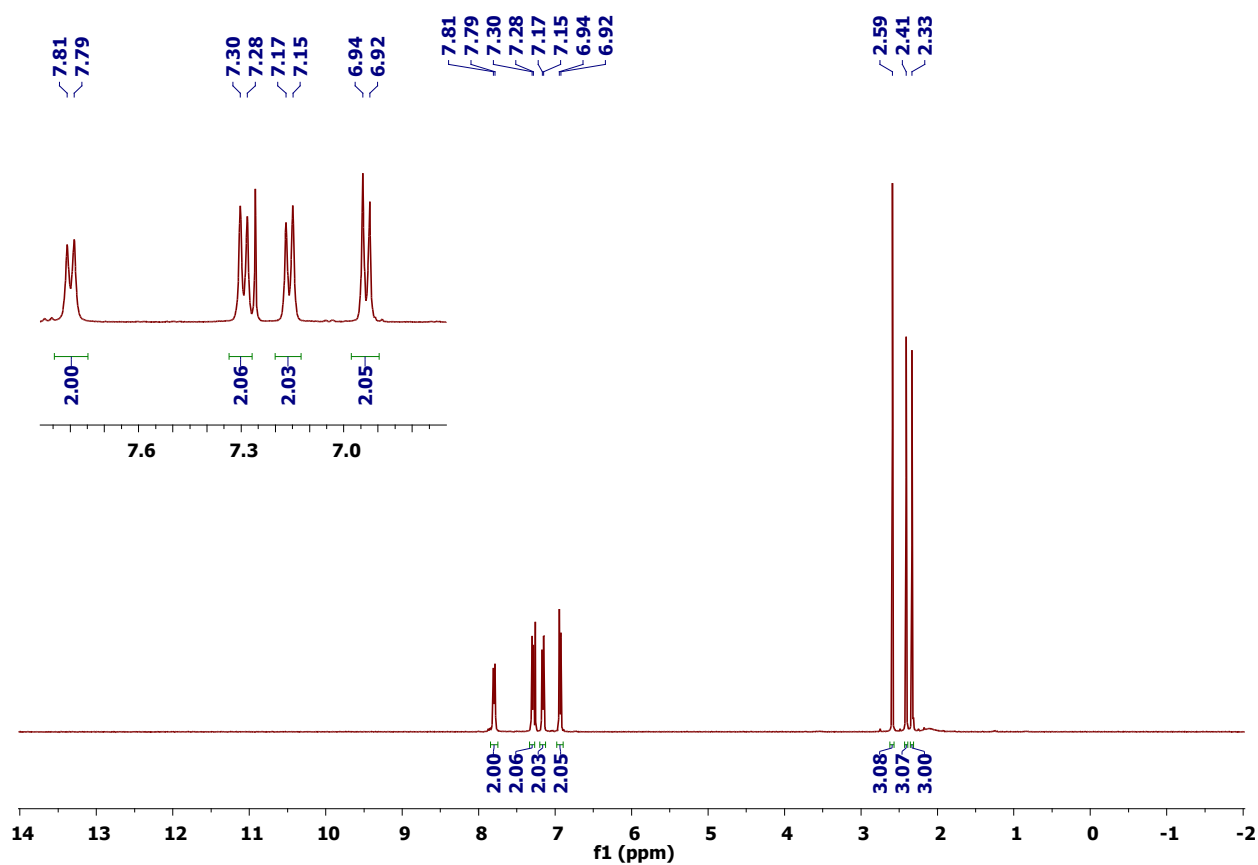

$^{13}\text{C}$  NMR ( $\text{CDCl}_3$ ) spectrum of (Z)-1-(4-(p-tolyl)-5-(p-tolylimino)-4,5-dihydro-1,3,4-thiadiazol-2-yl)ethan-1-one

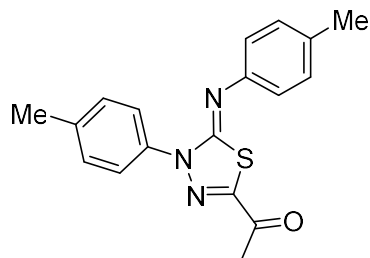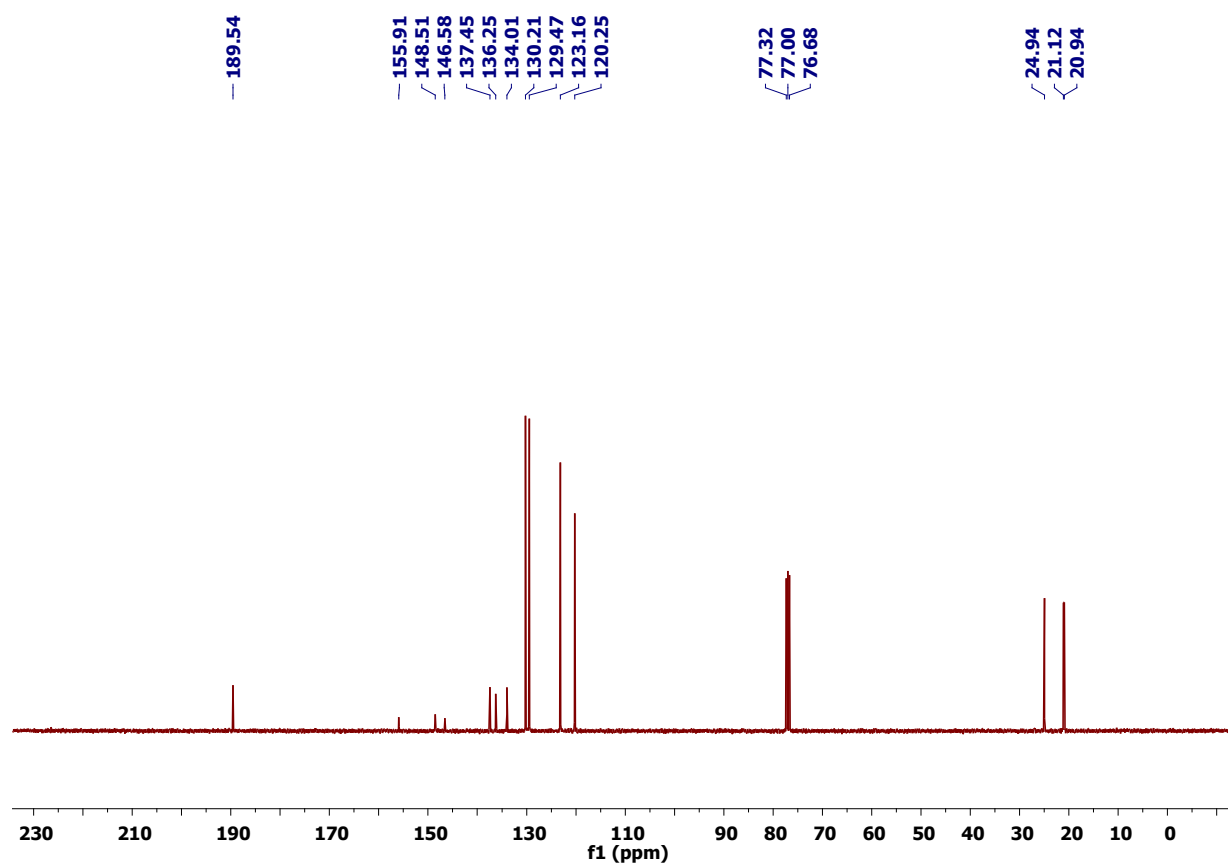

$^{13}\text{C}$  CRAPT NMR ( $\text{CDCl}_3$ ) spectrum of (Z)-1-(4-(p-tolyl)-5-(p-tolylimino)-4,5-dihydro-1,3,4-thiadiazol-2-yl)ethan-1-one

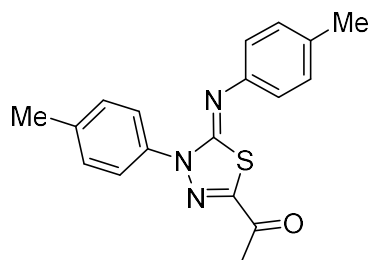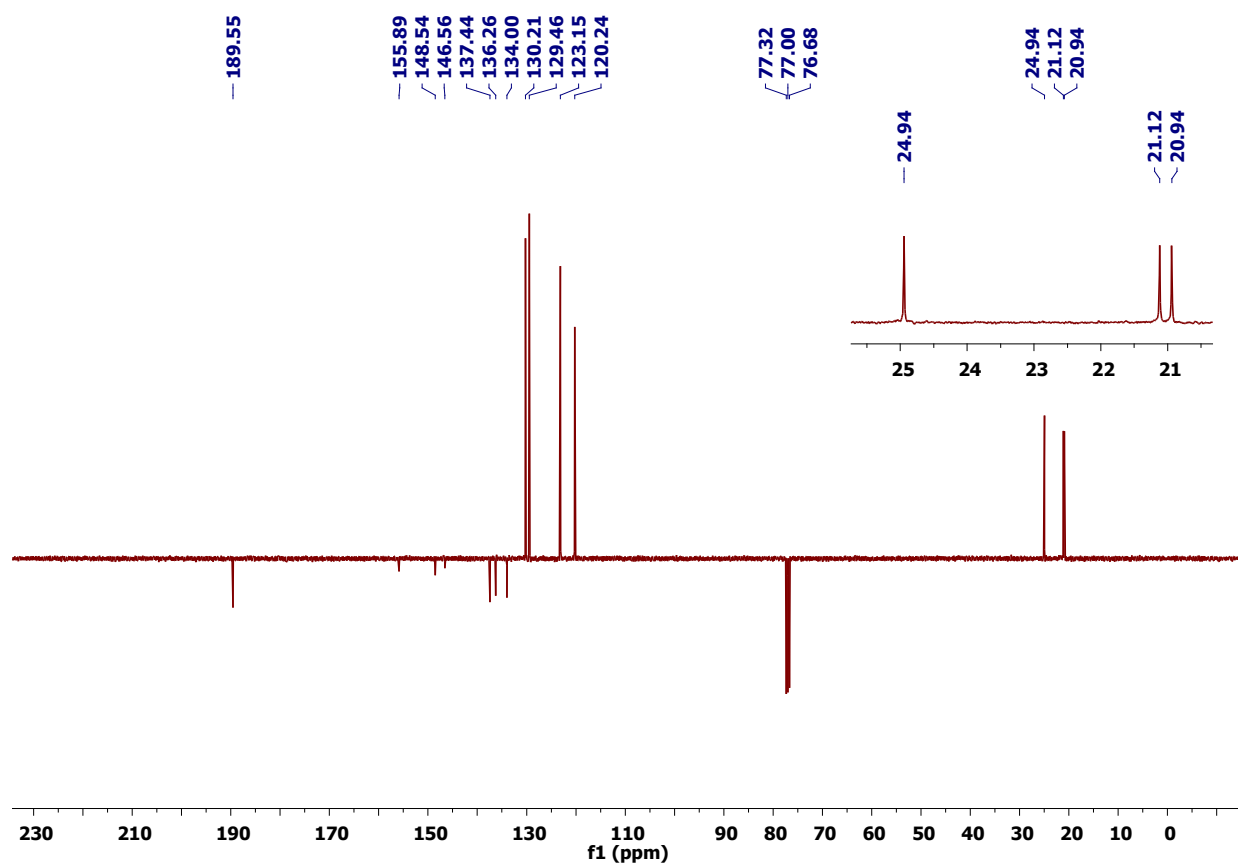



$^1\text{H}$ - $^1\text{H}$  gDQCOSY NMR ( $\text{CDCl}_3$ ) spectrum of (Z)-1-(4-(p-tolyl)-5-(p-tolylimino)-4,5-dihydro-1,3,4-thiadiazol-2-yl)ethan-1-one

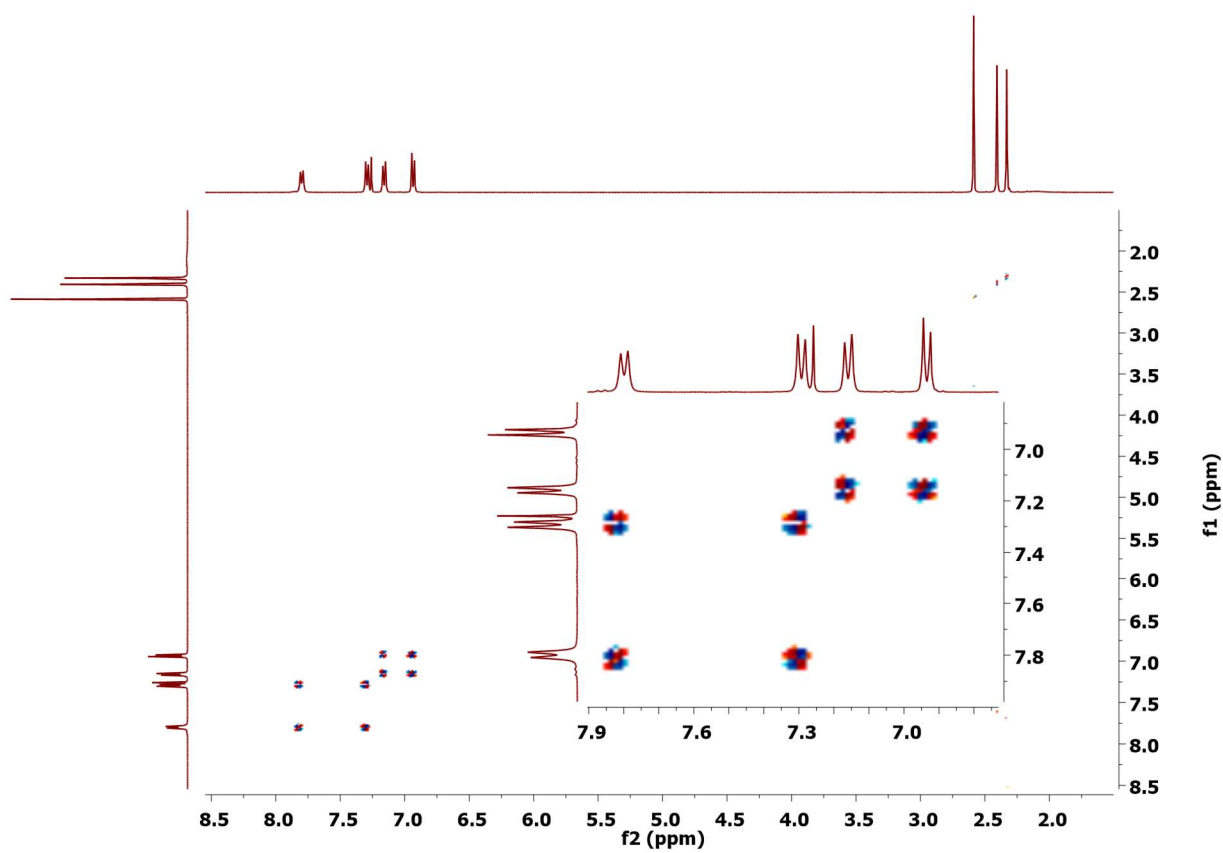

$^1\text{H}$ - $^{13}\text{C}$ -HSQC NMR ( $\text{CDCl}_3$ ) spectrum of (Z)-1-(4-(p-tolyl)-5-(p-tolylimino)-4,5-dihydro-1,3,4-thiadiazol-2-yl)ethan-1-one

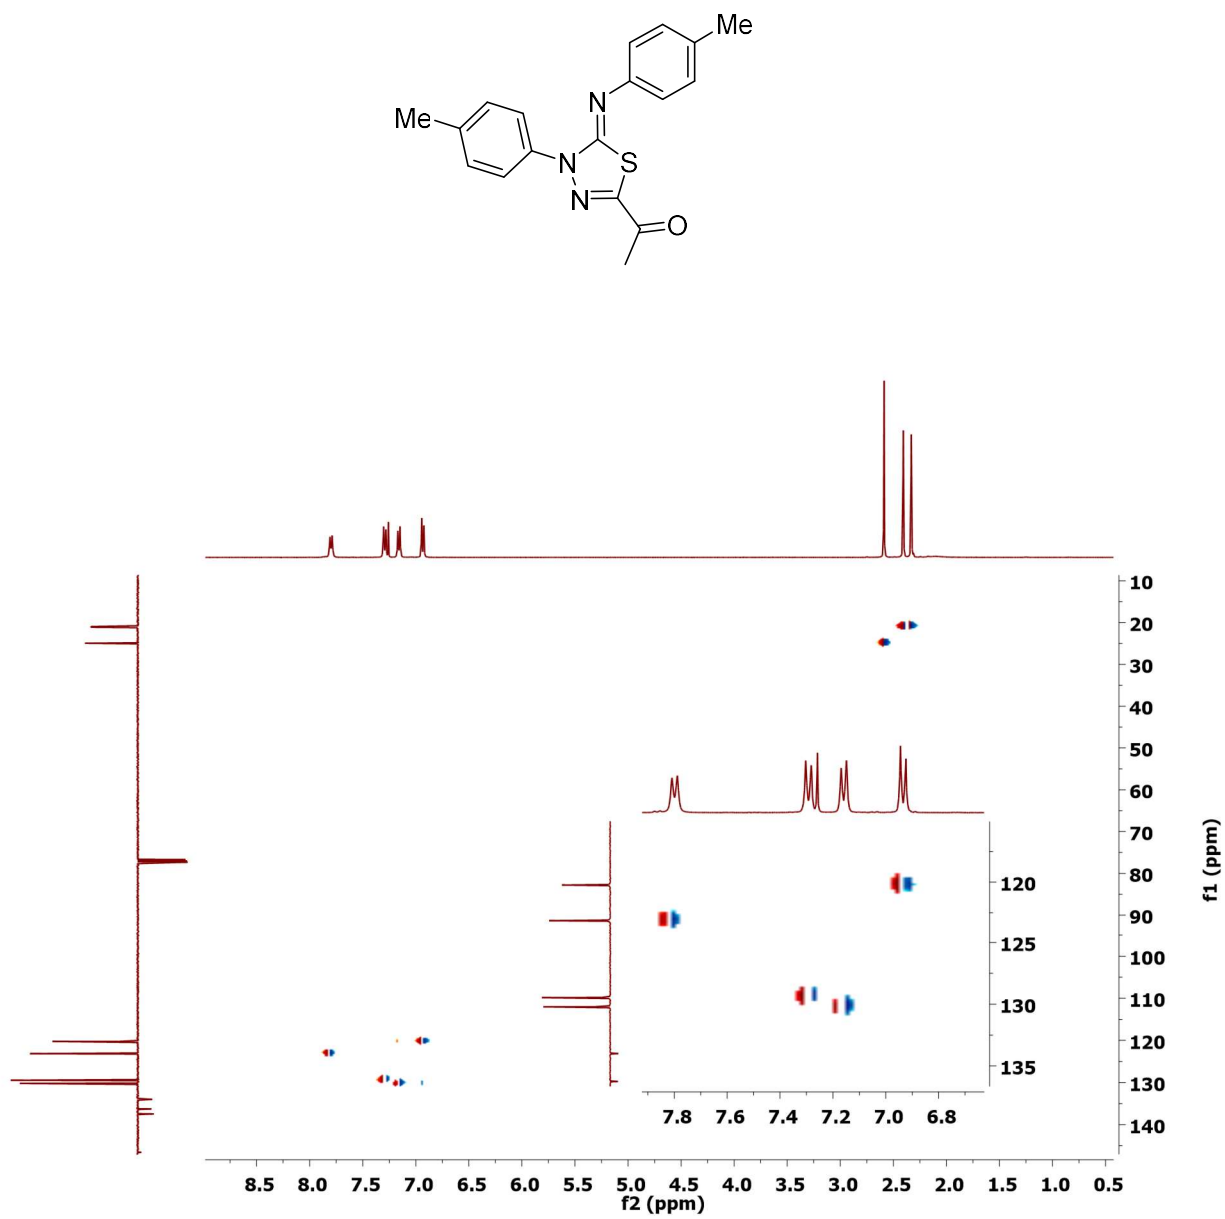

$^1\text{H}$ - $^{13}\text{C}$ -gHMBC NMR ( $\text{CDCl}_3$ ) spectrum of (Z)-1-(4-(p-tolyl)-5-(p-tolylimino)-4,5-dihydro-1,3,4-thiadiazol-2-yl)ethan-1-one

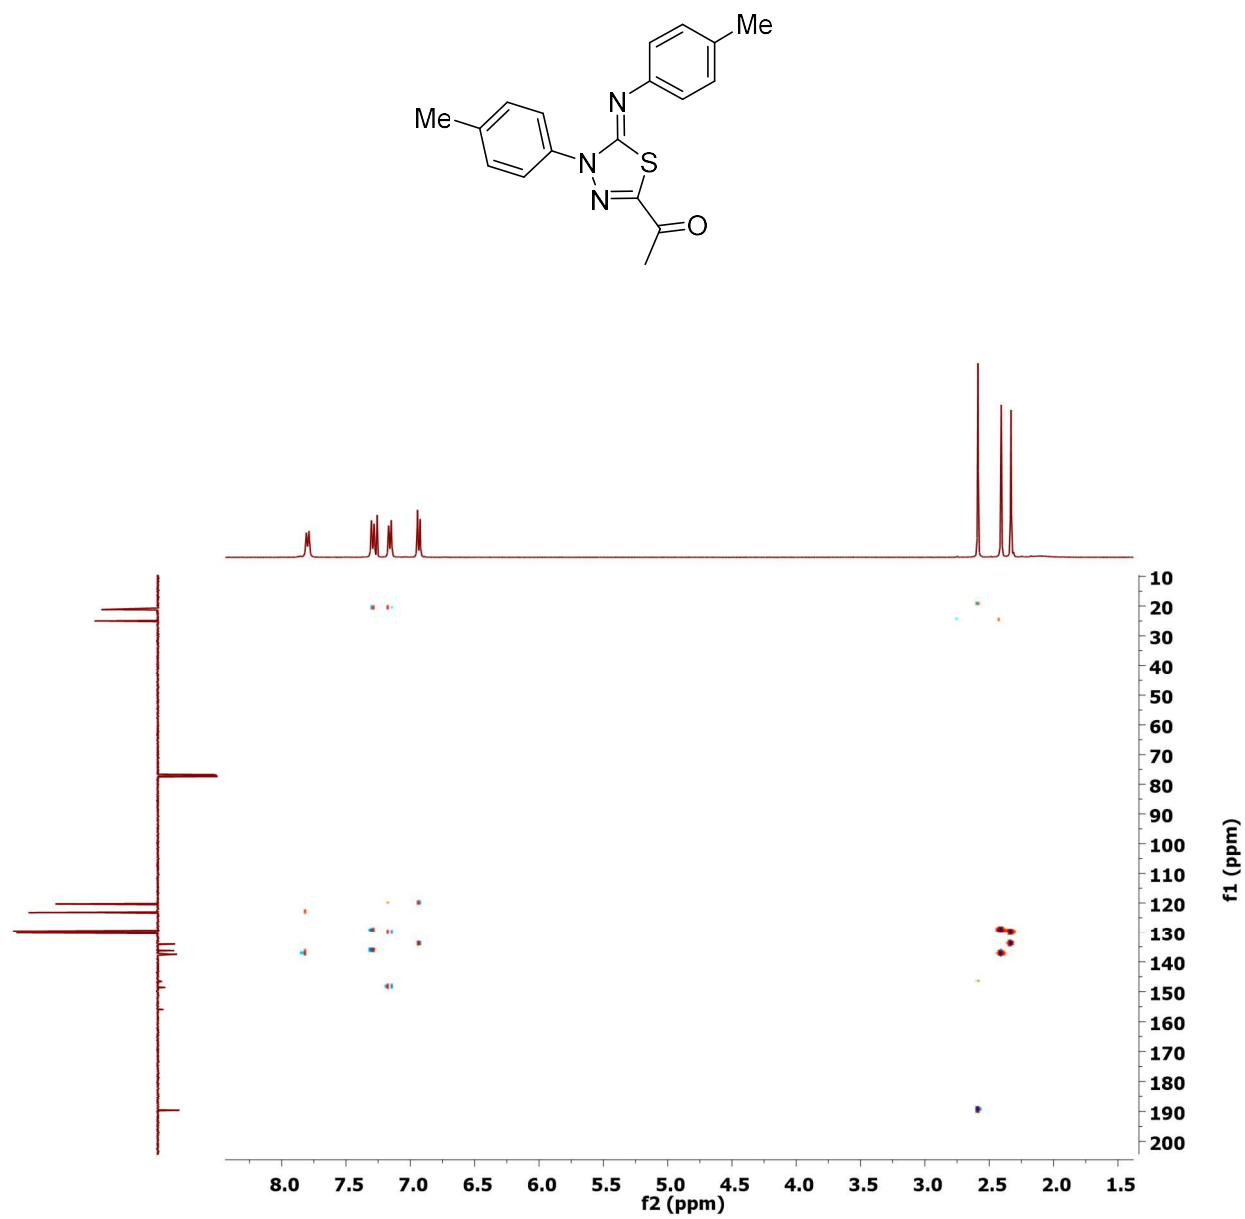

$^1\text{H}$  NMR ( $\text{CDCl}_3$ ) spectrum of (Z)-1-(4-(4-methoxyphenyl)-5-((4-methoxyphenyl)imino)-4,5-dihydro-1,3,4-thiadiazol-2-yl)ethan-1-one

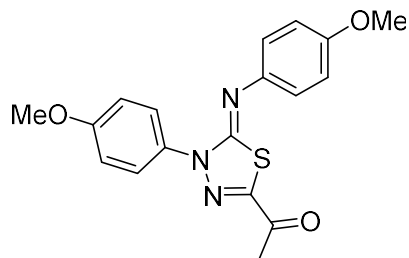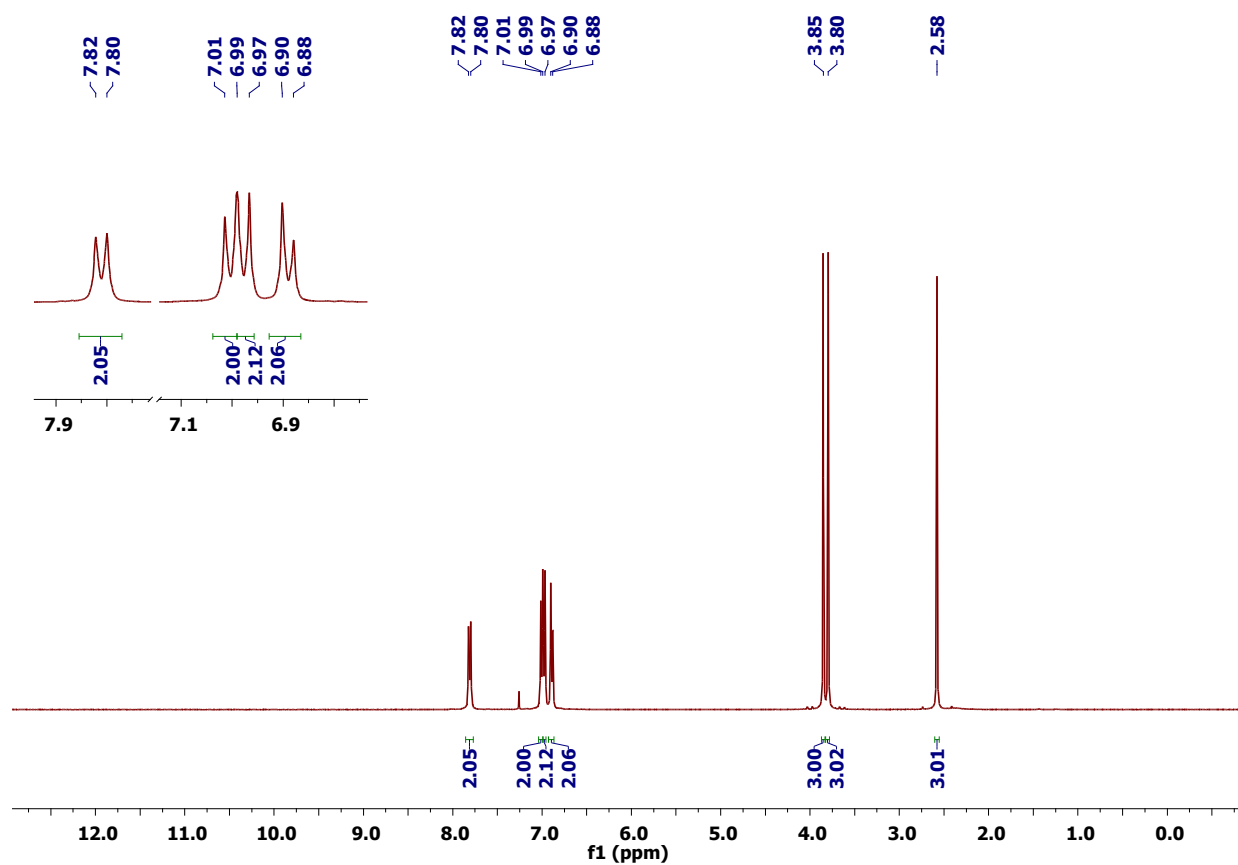

$^{13}\text{C}$  NMR ( $\text{CDCl}_3$ ) spectrum of (Z)-1-(4-(4-methoxyphenyl)-5-((4-methoxyphenyl)imino)-4,5-dihydro-1,3,4-thiadiazol-2-yl)ethan-1-one

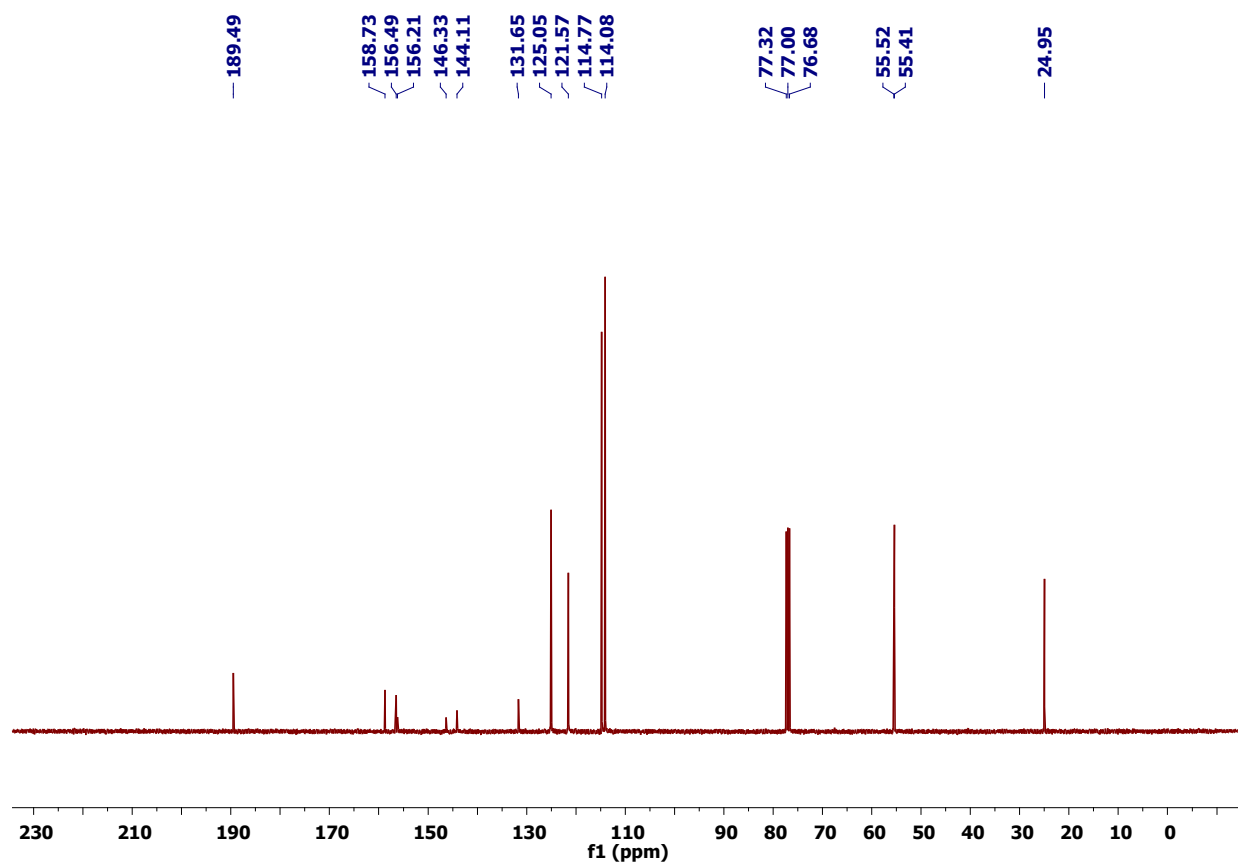

$^{13}\text{C}$  CRAPT NMR ( $\text{CDCl}_3$ ) spectrum of (Z)-1-(4-(4-methoxyphenyl)-5-((4-methoxyphenyl)imino)-4,5-dihydro-1,3,4-thiadiazol-2-yl)ethan-1-one

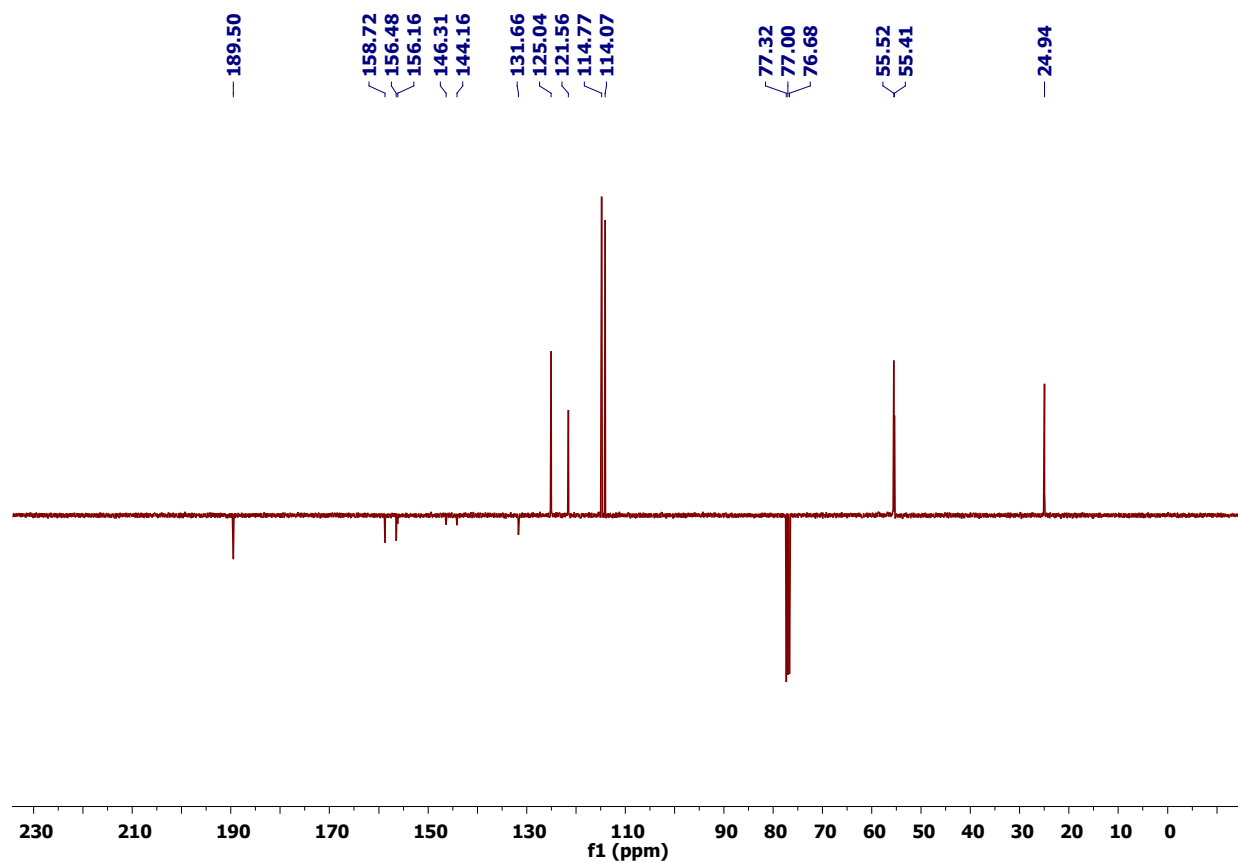

$^1\text{H}$ - $^1\text{H}$  gDQCOSY NMR ( $\text{CDCl}_3$ ) spectrum of (Z)-1-(4-(4-methoxyphenyl)-5-((4-methoxyphenyl)imino)-4,5-dihydro-1,3,4-thiadiazol-2-yl)ethan-1-one

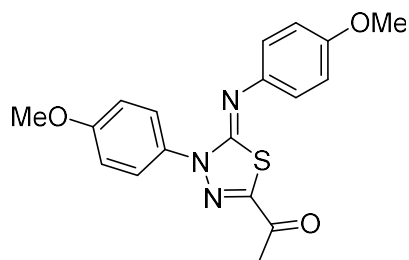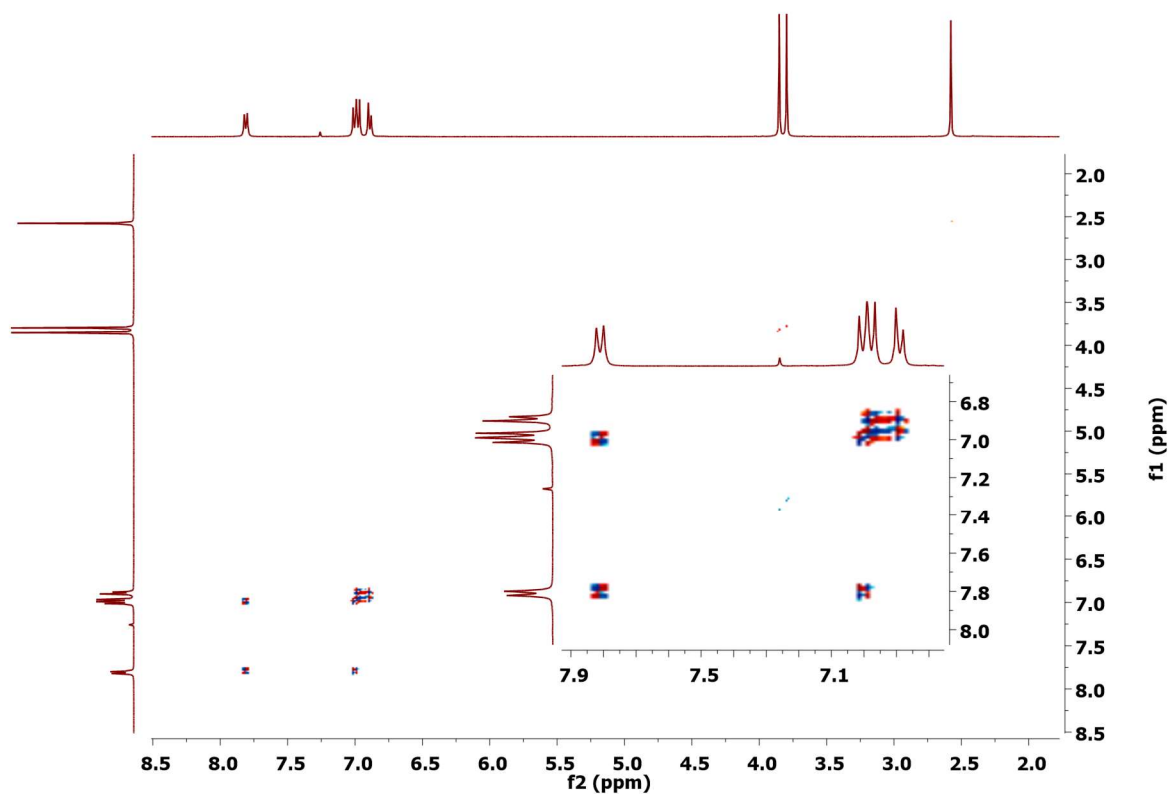

$^1\text{H}$ - $^{13}\text{C}$ -HSQC NMR ( $\text{CDCl}_3$ ) spectrum of (Z)-1-(4-(4-methoxyphenyl)-5-((4-methoxyphenyl)imino)-4,5-dihydro-1,3,4-thiadiazol-2-yl)ethan-1-one

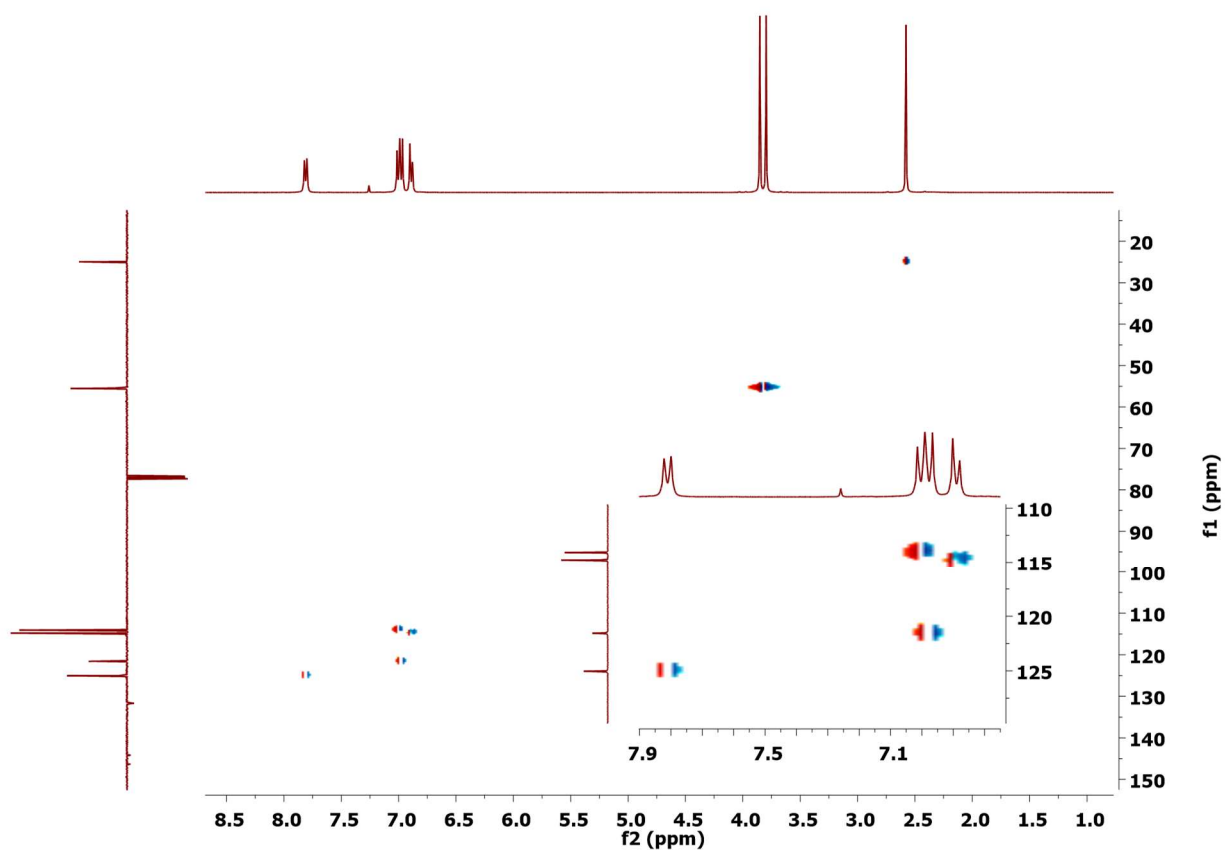



$^1\text{H}$ - $^{13}\text{C}$ -gHMBC NMR ( $\text{CDCl}_3$ ) spectrum of (Z)-1-(4-(4-methoxyphenyl)-5-((4-methoxyphenyl)imino)-4,5-dihydro-1,3,4-thiadiazol-2-yl)ethan-1-one

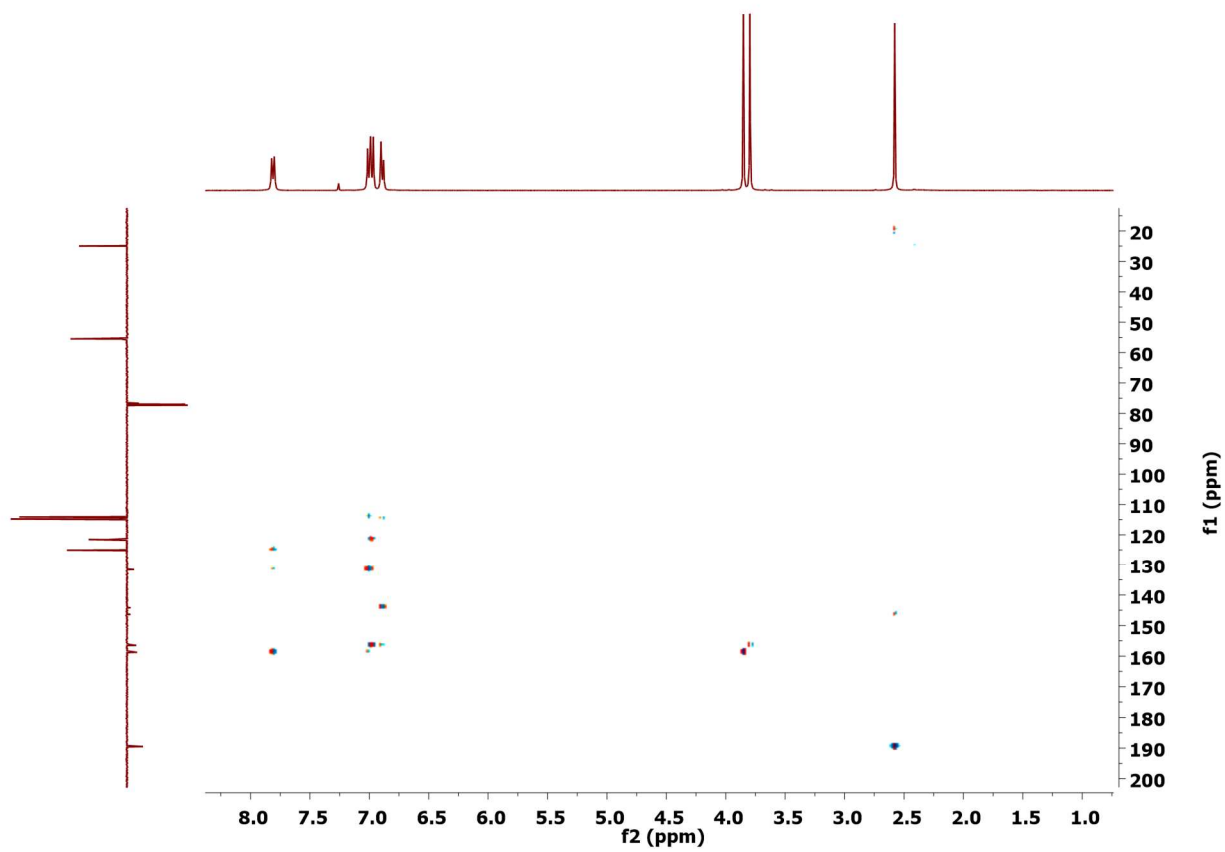

$^1\text{H}$  NMR ( $\text{CDCl}_3$ ) spectrum of (Z)-1-(5-((4-chlorophenyl)imino)-4-(p-tolyl)-4,5-dihydro-1,3,4-thiadiazol-2-yl)ethan-1-one

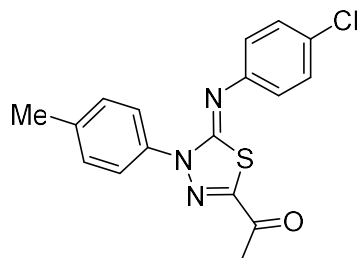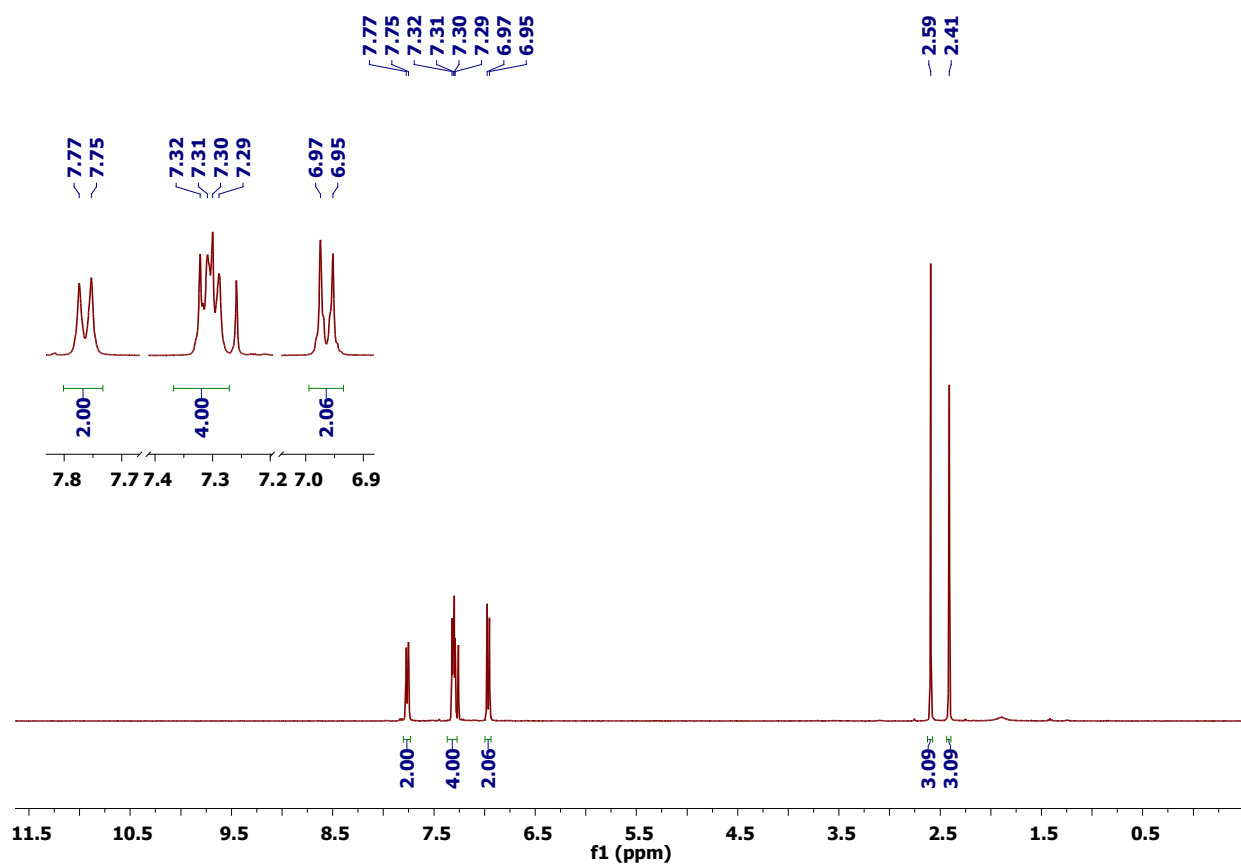

$^{13}\text{C}$  NMR ( $\text{CDCl}_3$ ) spectrum of (Z)-1-(5-((4-chlorophenyl)imino)-4-(p-tolyl)-4,5-dihydro-1,3,4-thiadiazol-2-yl)ethan-1-one

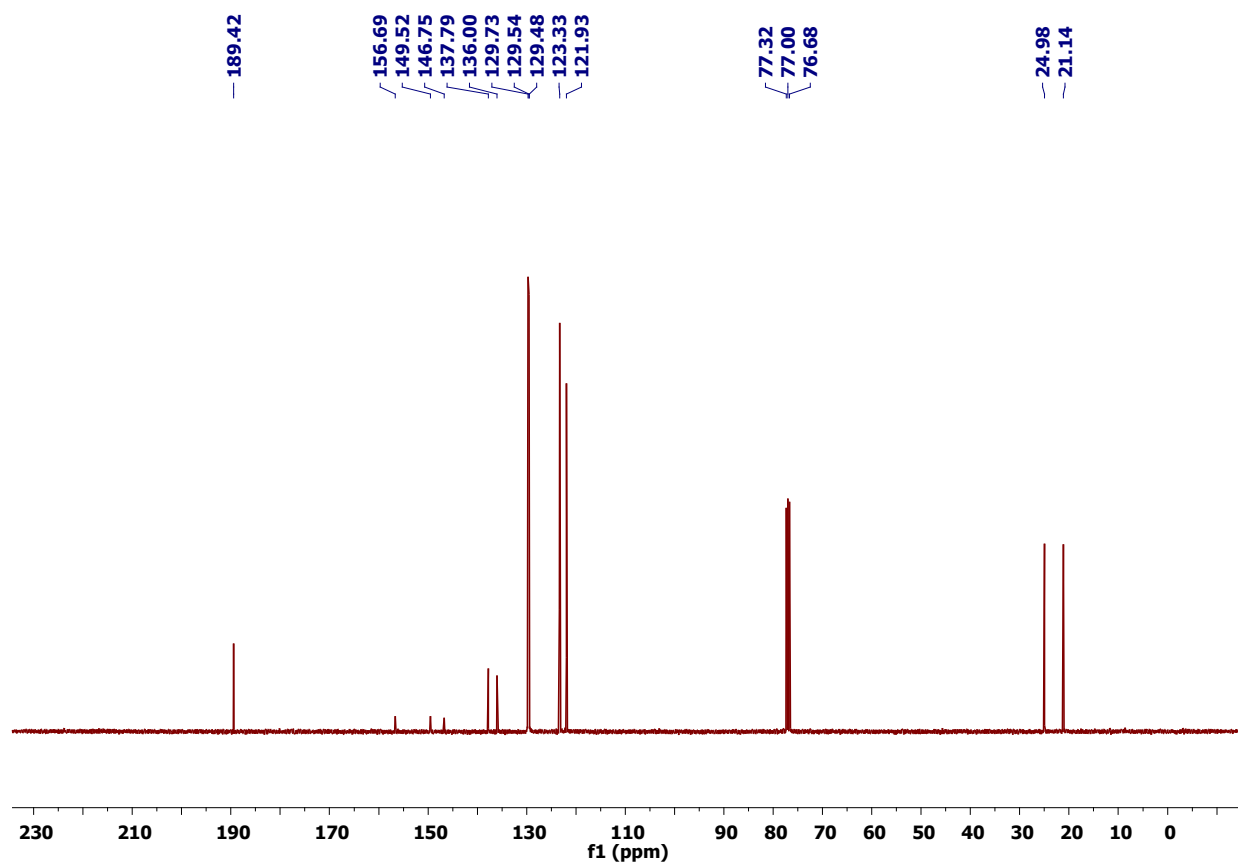

$^{13}\text{C}$  CRAPT NMR ( $\text{CDCl}_3$ ) spectrum of (Z)-1-(5-((4-chlorophenyl)imino)-4-(p-tolyl)-4,5-dihydro-1,3,4-thiadiazol-2-yl)ethan-1-one

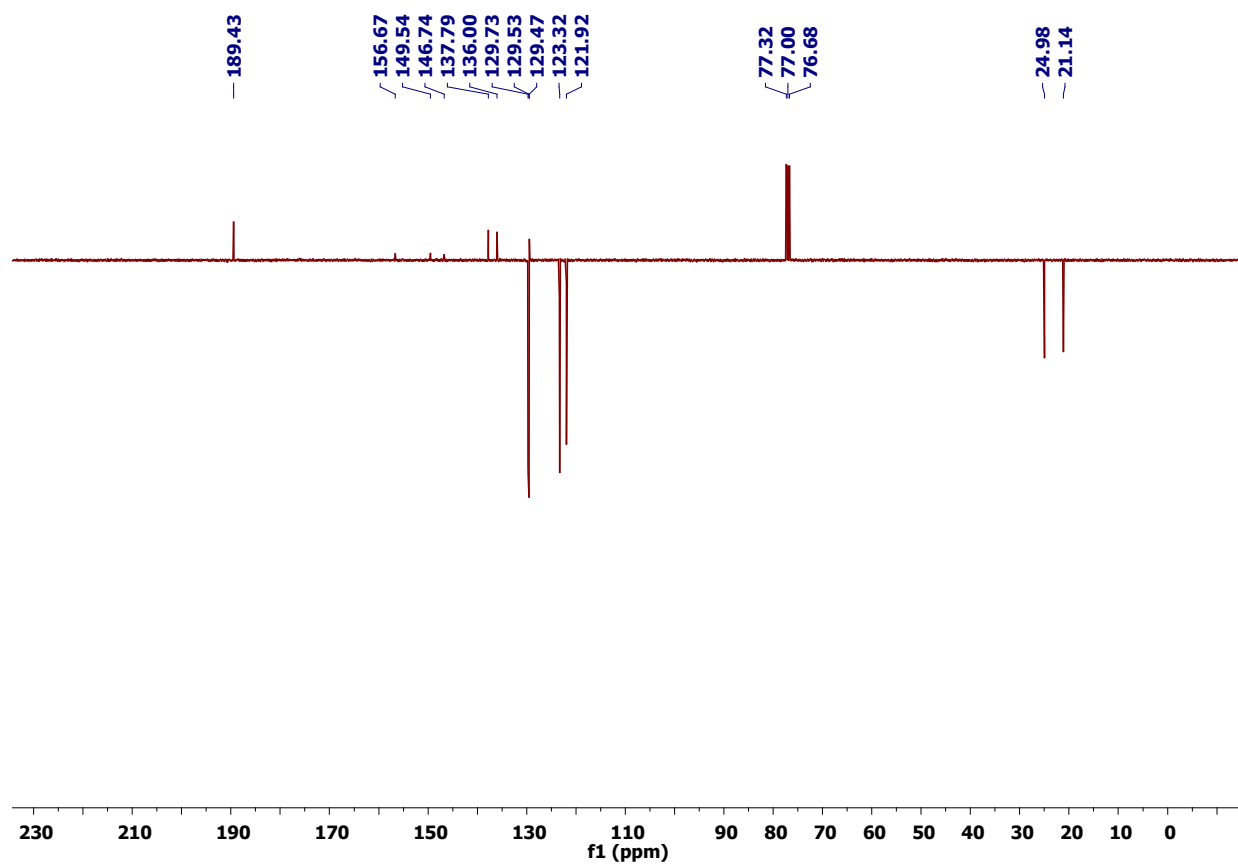

$^1\text{H}$ - $^1\text{H}$  gDQCOSY NMR ( $\text{CDCl}_3$ ) spectrum of (Z)-1-(5-((4-chlorophenyl)imino)-4-(p-tolyl)-4,5-dihydro-1,3,4-thiadiazol-2-yl)ethan-1-one

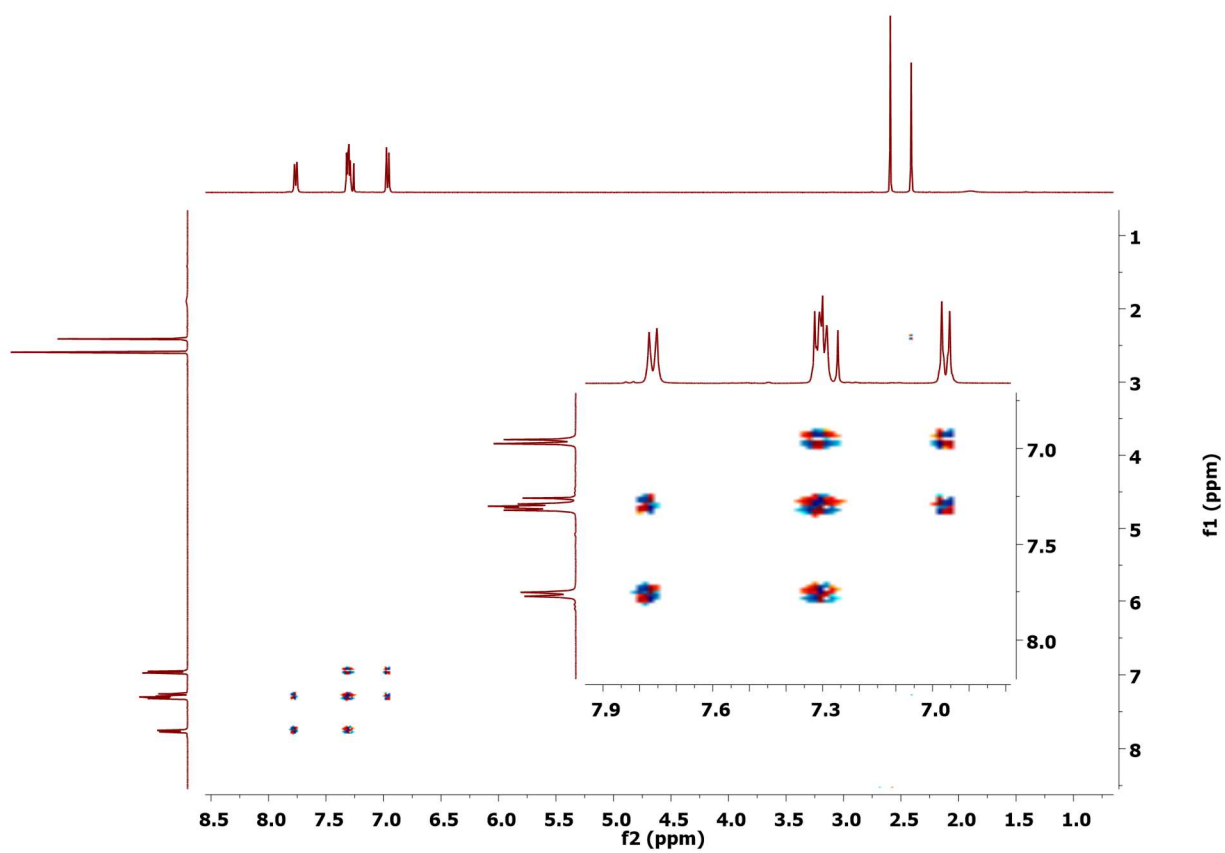

$^1\text{H}$ - $^{13}\text{C}$ -HSQC NMR ( $\text{CDCl}_3$ ) spectrum of (Z)-1-(5-((4-chlorophenyl)imino)-4-(p-tolyl)-4,5-dihydro-1,3,4-thiadiazol-2-yl)ethan-1-one

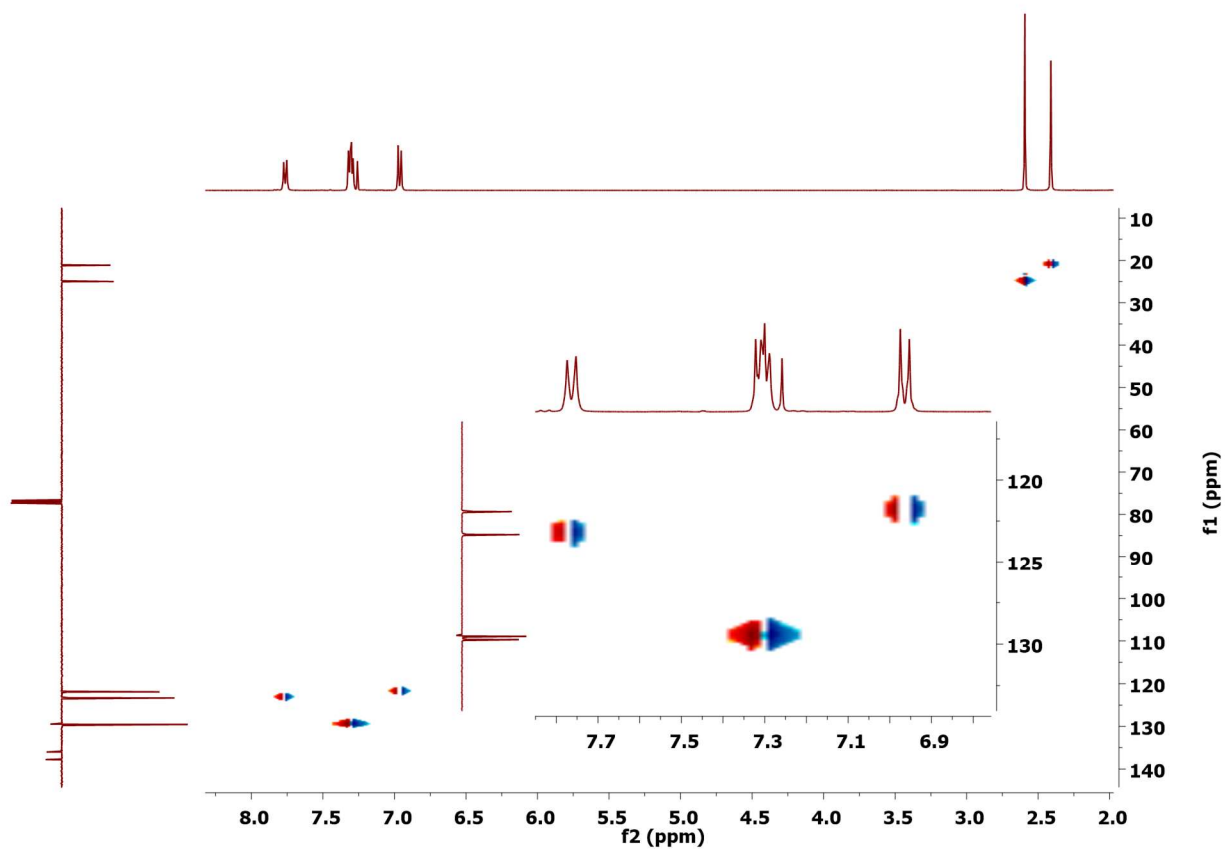

$^1\text{H}$ - $^{13}\text{C}$ -gHMBC NMR ( $\text{CDCl}_3$ ) spectrum of (Z)-1-(5-((4-chlorophenyl)imino)-4-(p-tolyl)-4,5-dihydro-1,3,4-thiadiazol-2-yl)ethan-1-one

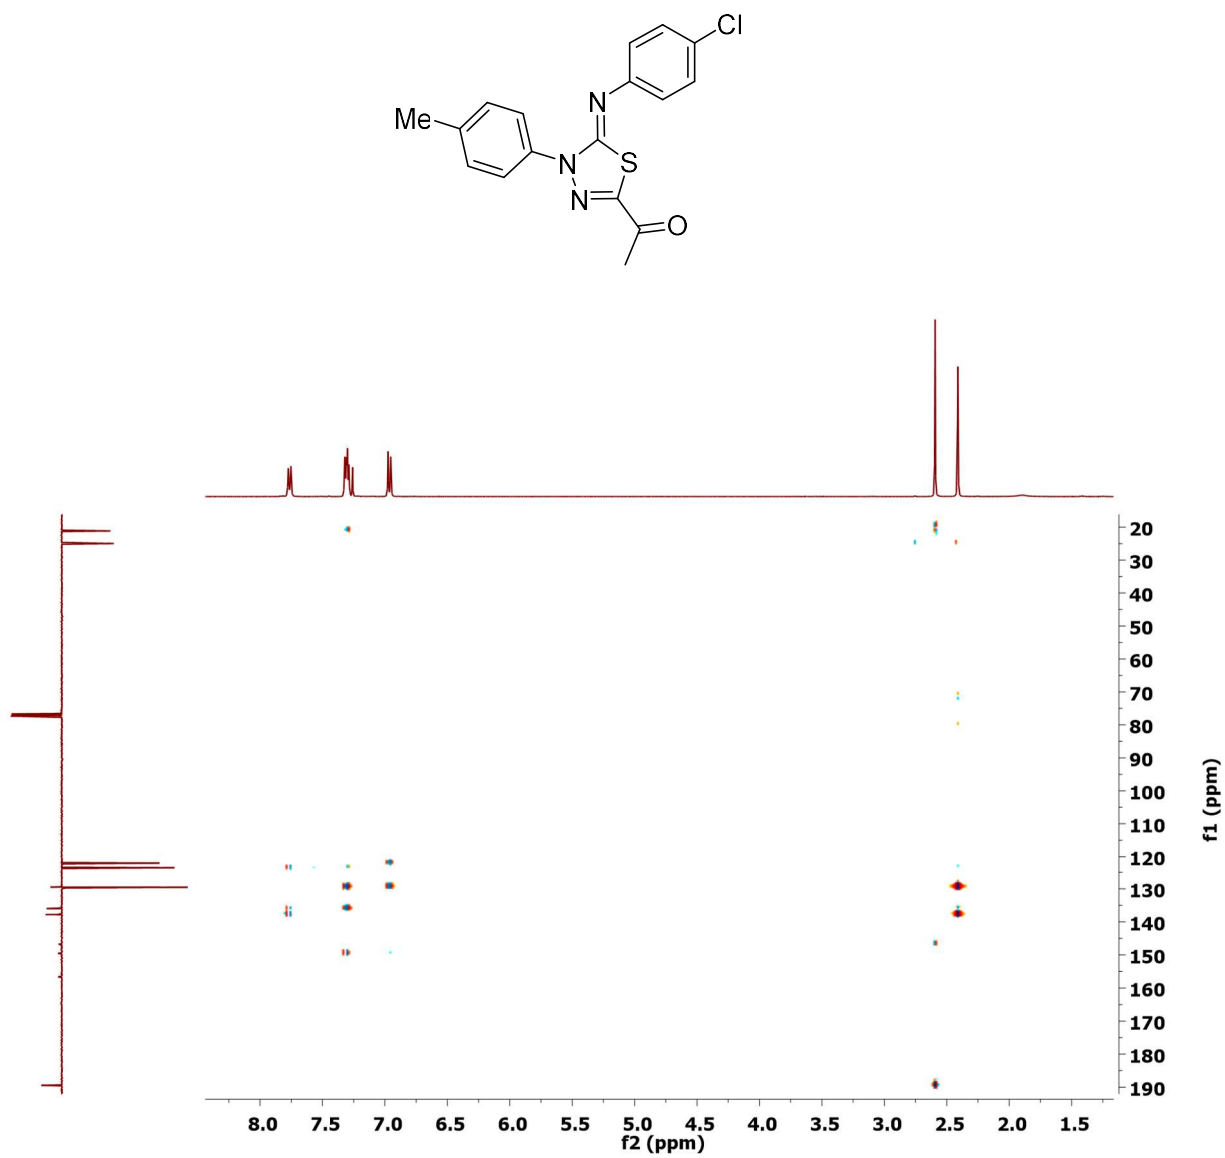

$^1\text{H}$  NMR ( $\text{CDCl}_3$ ) spectrum of (Z)-1-(4-(4-chlorophenyl)-5-((4-nitrophenyl)imino)-4,5-dihydro-1,3,4-thiadiazol-2-yl)ethan-1-one

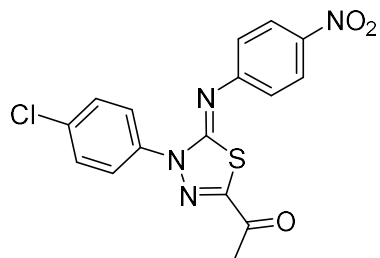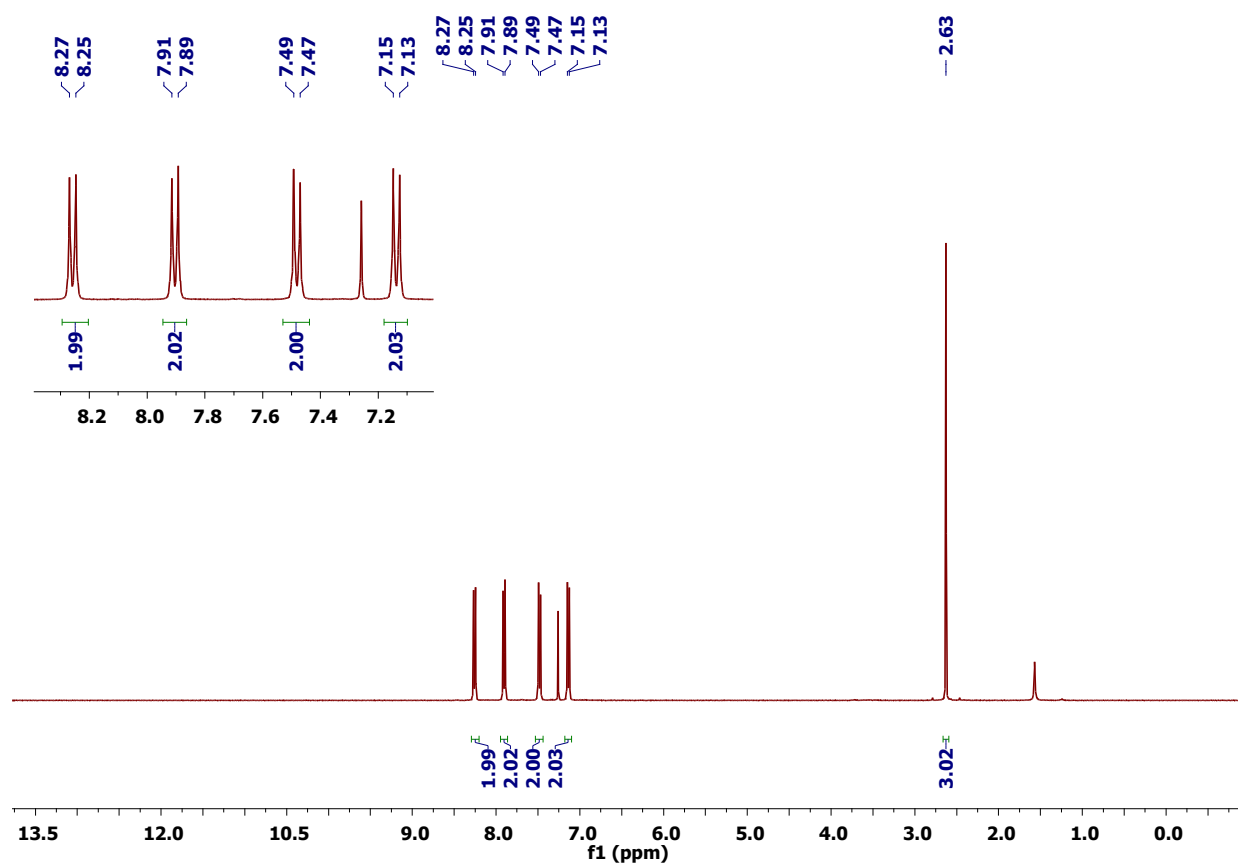



$^{13}\text{C}$  NMR ( $\text{CDCl}_3$ ) spectrum of (Z)-1-(4-(4-chlorophenyl)-5-((4-nitrophenyl)imino)-4,5-dihydro-1,3,4-thiadiazol-2-yl)ethan-1-one

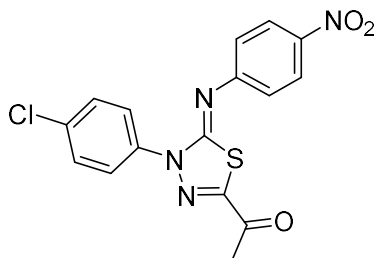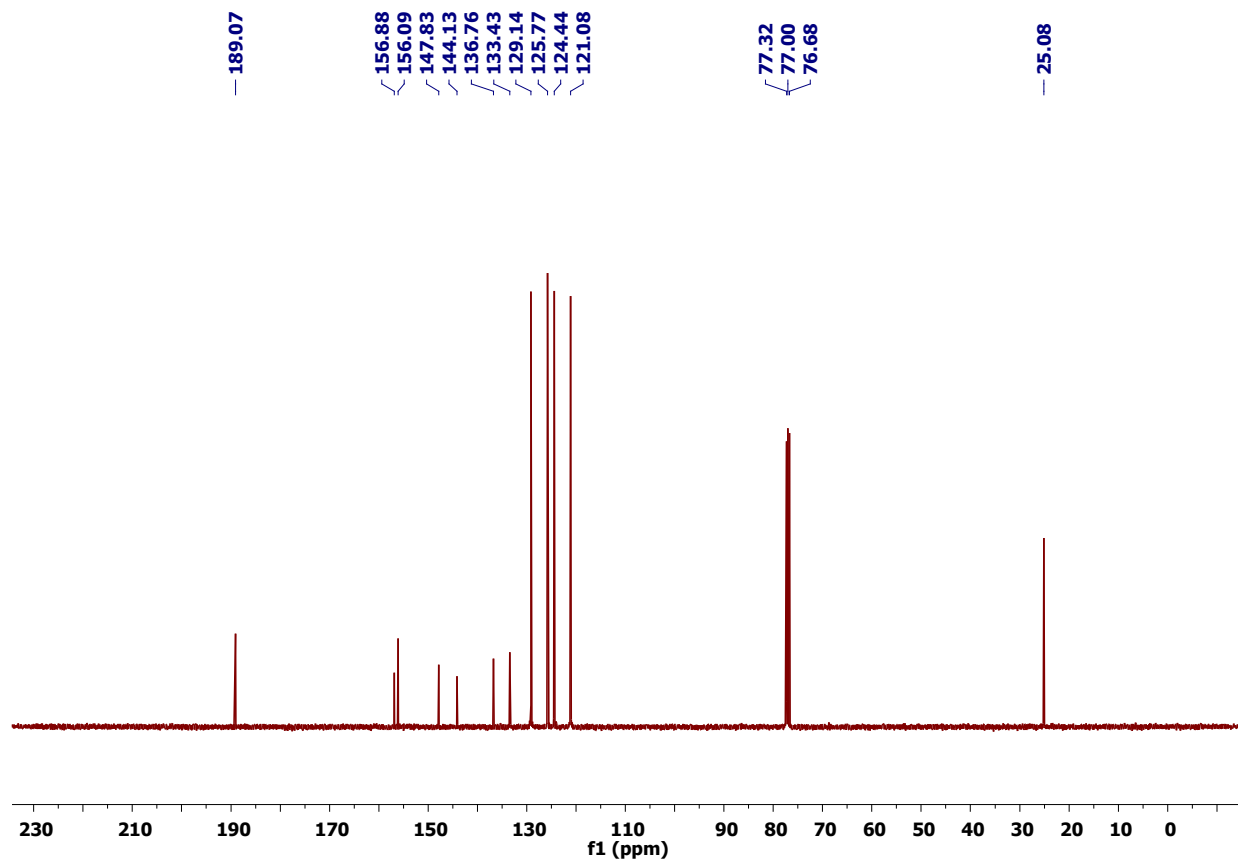

$^{13}\text{C}$  CRAPT NMR ( $\text{CDCl}_3$ ) spectrum of (Z)-1-(4-(4-chlorophenyl)-5-((4-nitrophenyl)imino)-4,5-dihydro-1,3,4-thiadiazol-2-yl)ethan-1-one

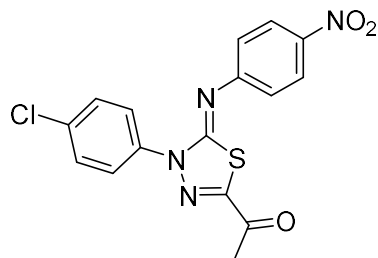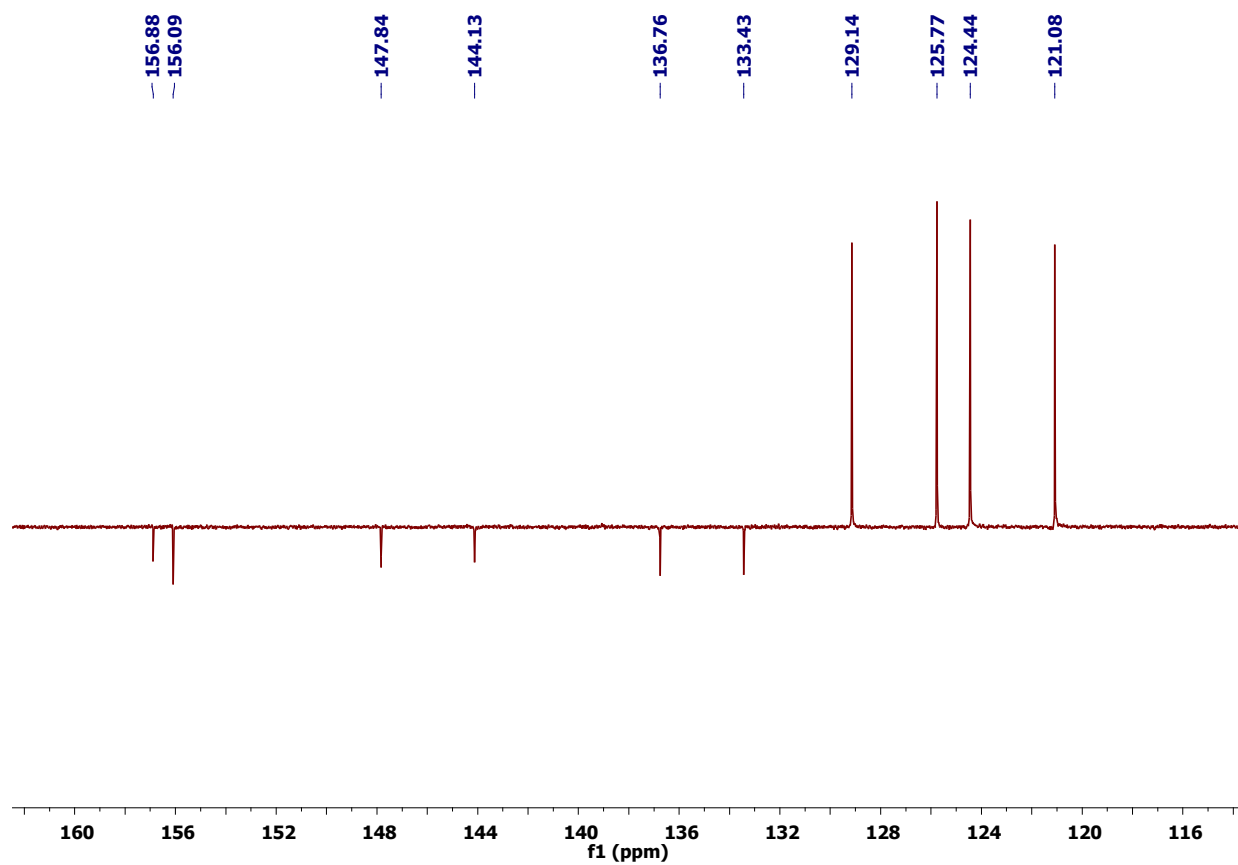

$^1\text{H}$ - $^1\text{H}$  gDQCOSY NMR ( $\text{CDCl}_3$ ) spectrum of (Z)-1-(4-(4-chlorophenyl)-5-((4-nitrophenyl)imino)-4,5-dihydro-1,3,4-thiadiazol-2-yl)ethan-1-one

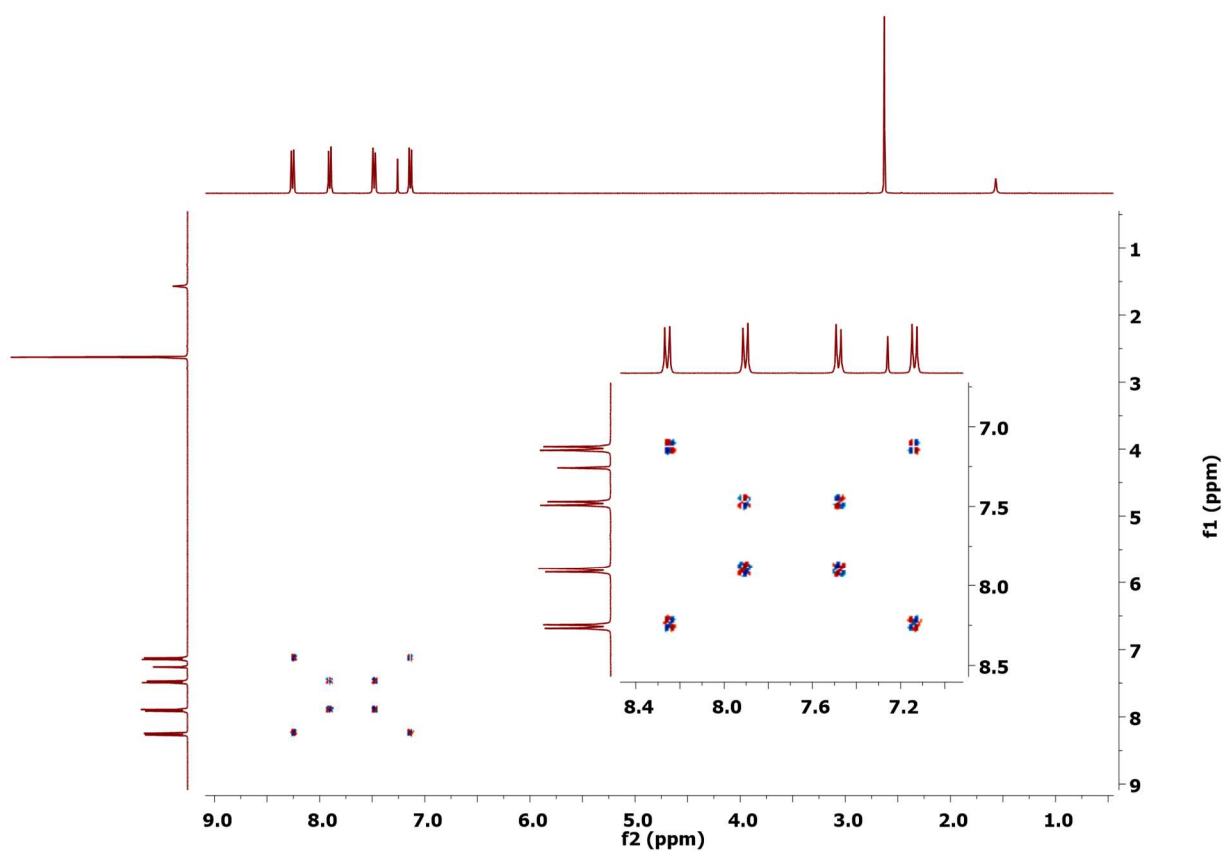

$^1\text{H}$ - $^{13}\text{C}$ -HSQC NMR ( $\text{CDCl}_3$ ) spectrum of (Z)-1-(4-(4-chlorophenyl)-5-((4-nitrophenyl)imino)-4,5-dihydro-1,3,4-thiadiazol-2-yl)ethan-1-one

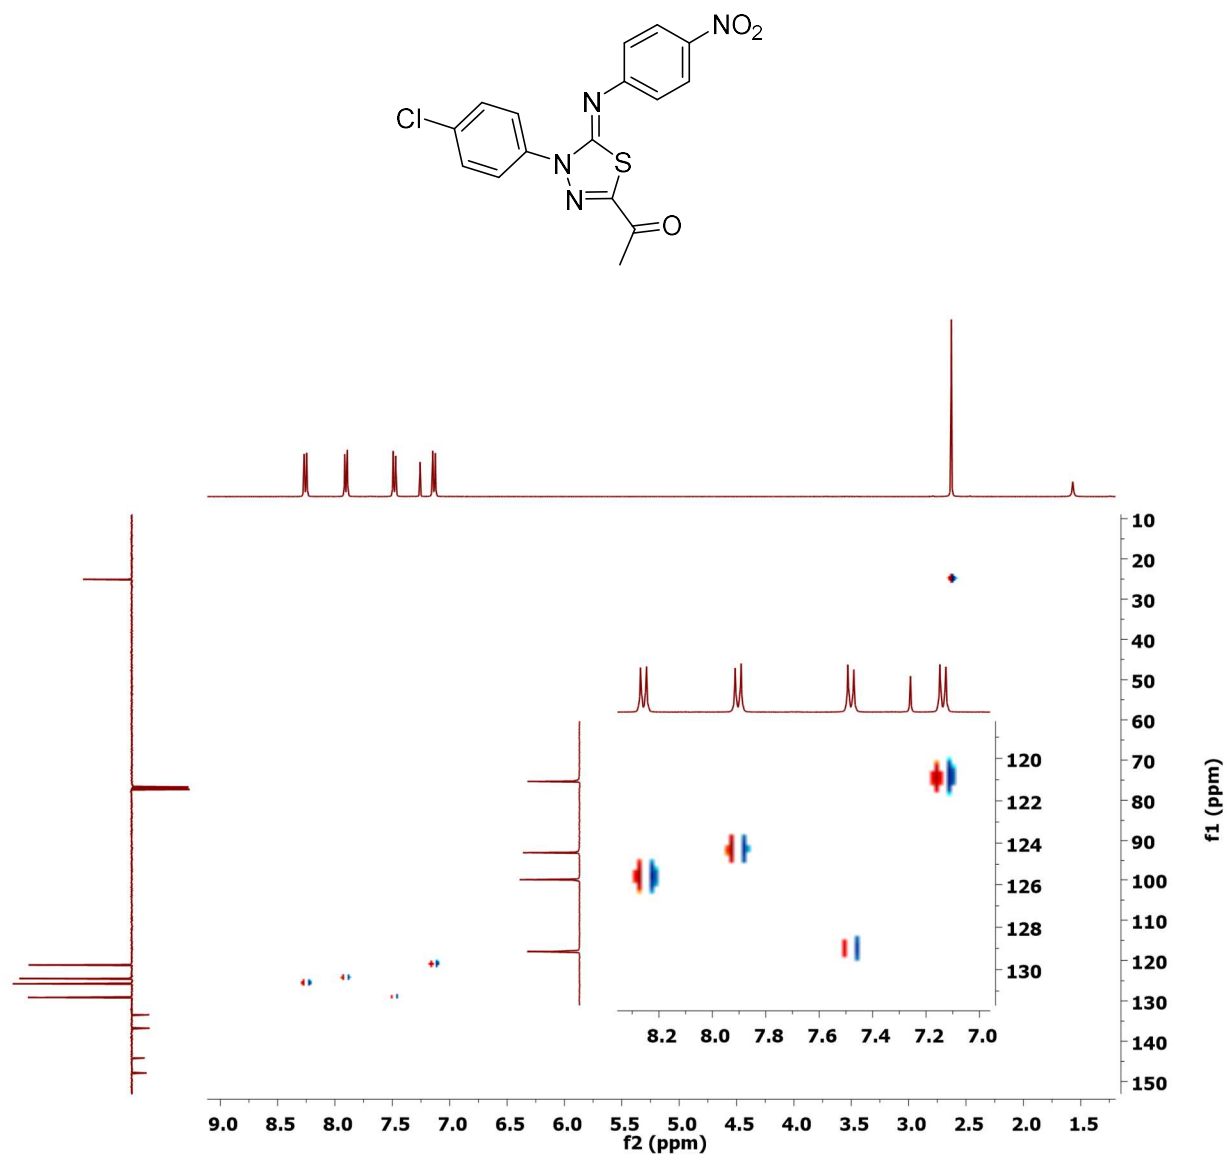

$^1\text{H}$ - $^{13}\text{C}$ -gHMBC NMR ( $\text{CDCl}_3$ ) spectrum of (Z)-1-(4-(4-chlorophenyl)-5-((4-nitrophenyl)imino)-4,5-dihydro-1,3,4-thiadiazol-2-yl)ethan-1-one

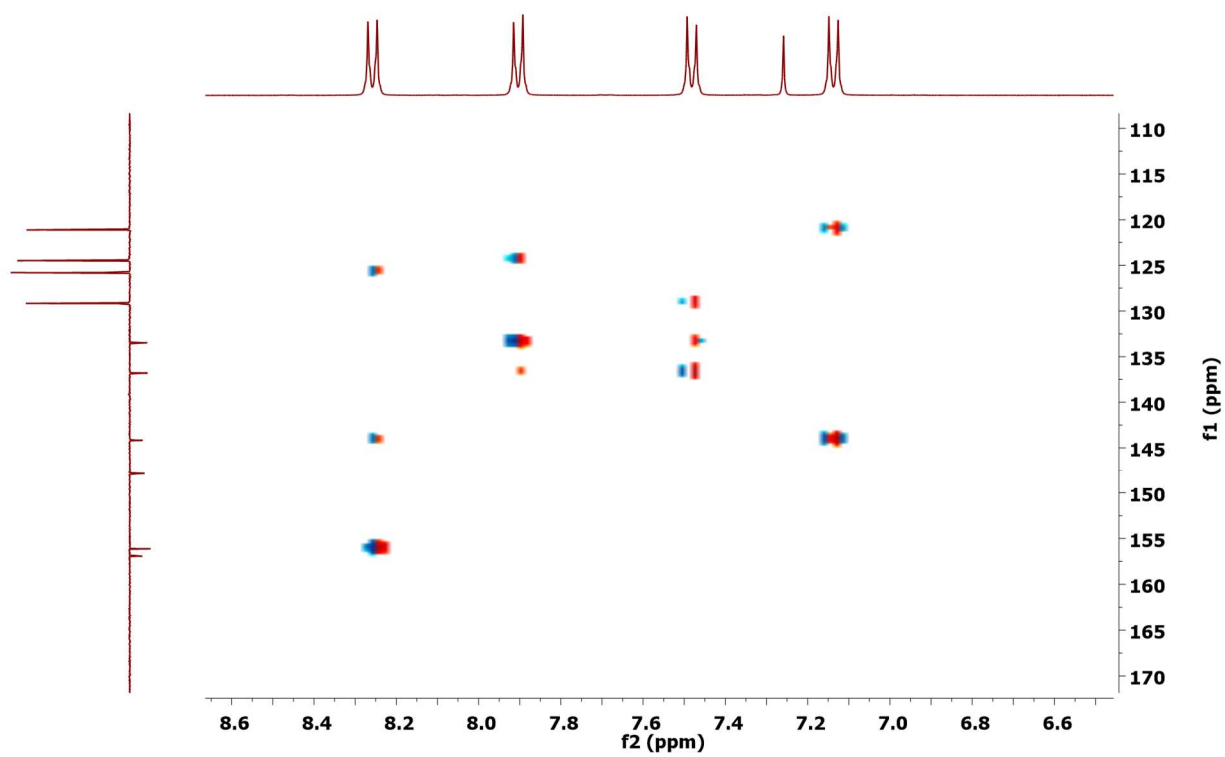

$^1\text{H}$  NMR ( $\text{CDCl}_3$ ) spectrum of (Z)-1-(4-(4-bromophenyl)-5-((4-nitrophenyl)imino)-4,5-dihydro-1,3,4-thiadiazol-2-yl)ethan-1-one

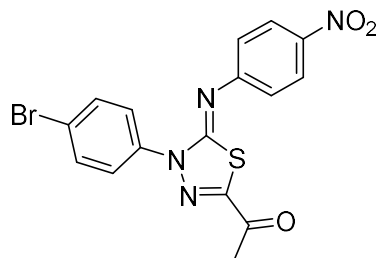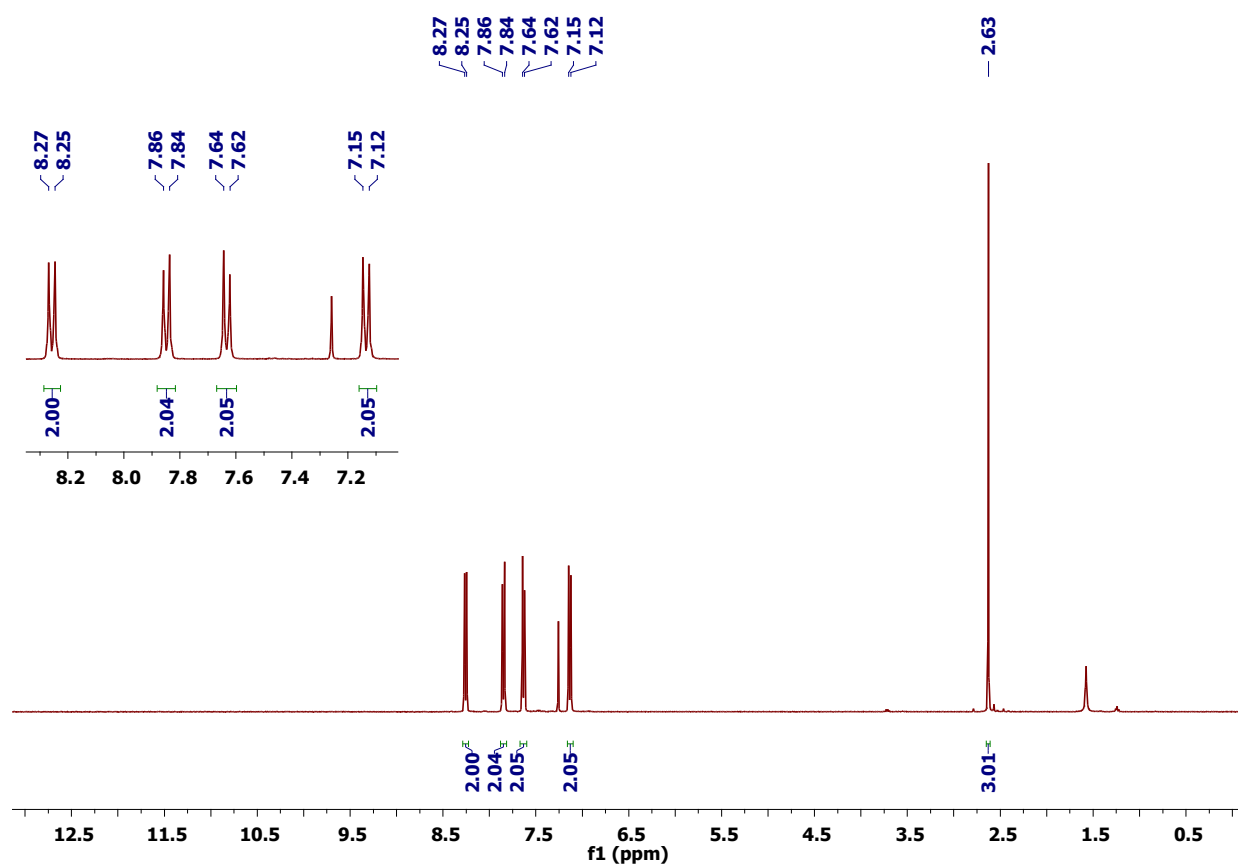

$^{13}\text{C}$  NMR ( $\text{CDCl}_3$ ) spectrum of (Z)-1-(4-(4-bromophenyl)-5-((4-nitrophenyl)imino)-4,5-dihydro-1,3,4-thiadiazol-2-yl)ethan-1-one

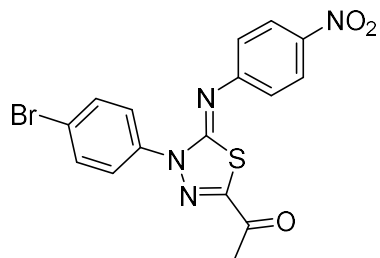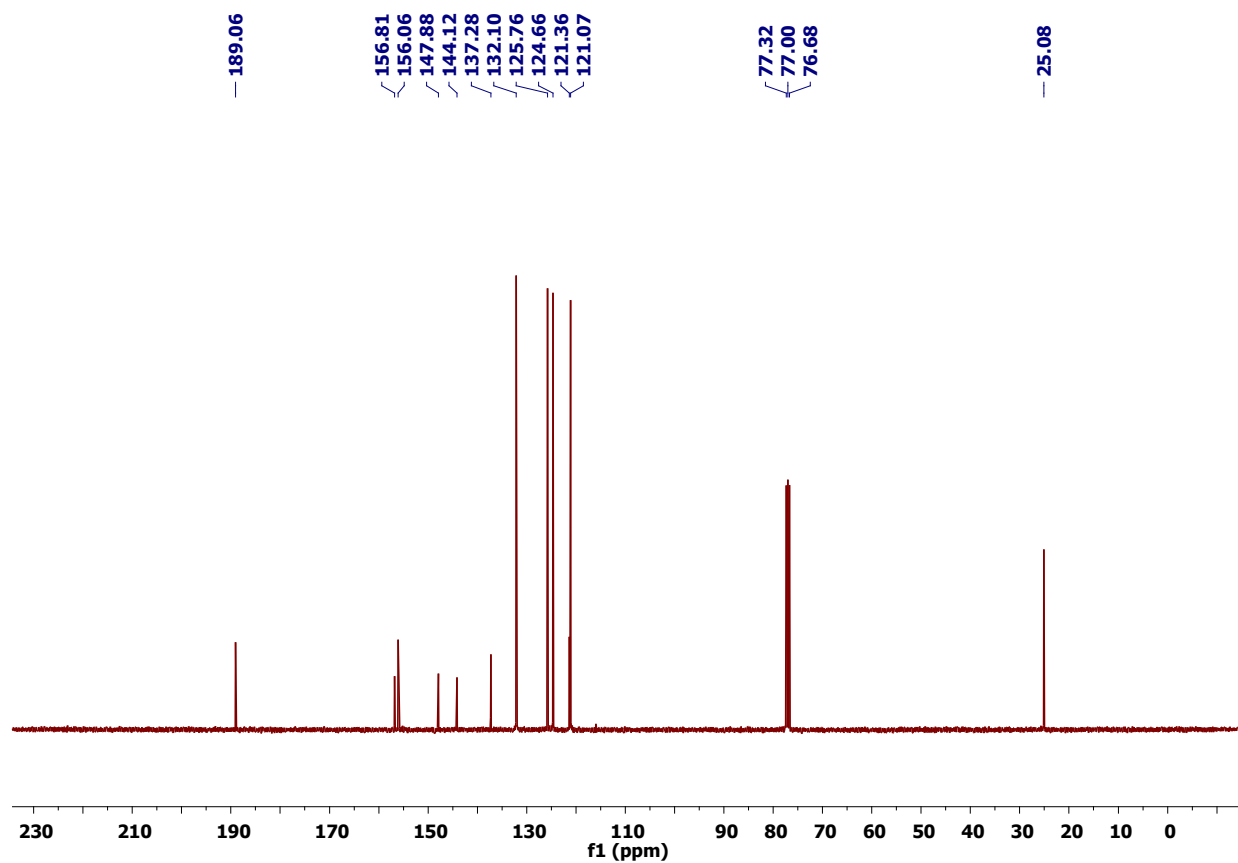

$^{13}\text{C}$  CRAPT NMR ( $\text{CDCl}_3$ ) spectrum of (Z)-1-(4-(4-bromophenyl)-5-((4-nitrophenyl)imino)-4,5-dihydro-1,3,4-thiadiazol-2-yl)ethan-1-one

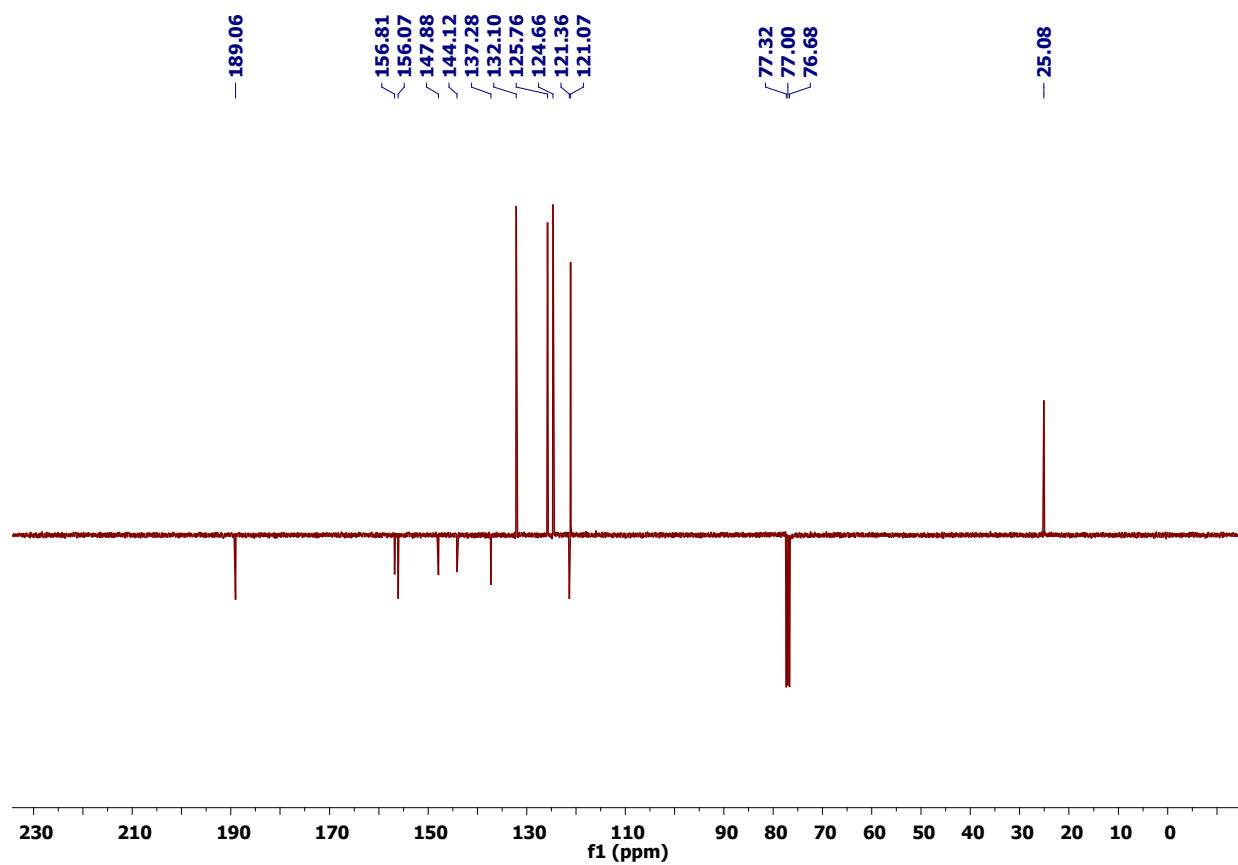



$^1\text{H}$ - $^1\text{H}$  gDQCOSY NMR ( $\text{CDCl}_3$ ) spectrum of (Z)-1-(4-(4-bromophenyl)-5-((4-nitrophenyl)imino)-4,5-dihydro-1,3,4-thiadiazol-2-yl)ethan-1-one

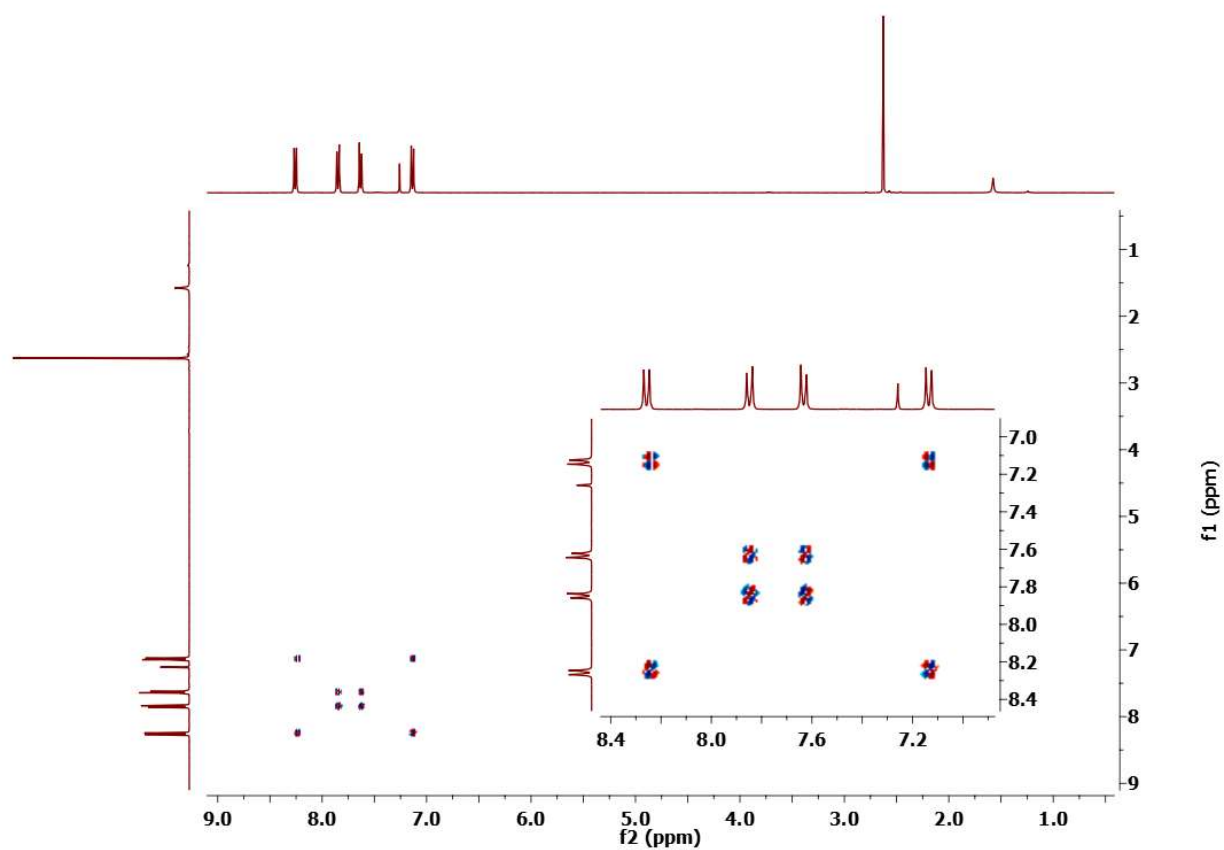

$^1\text{H}$ - $^{13}\text{C}$ -HSQC NMR ( $\text{CDCl}_3$ ) spectrum of (Z)-1-(4-(4-bromophenyl)-5-((4-nitrophenyl)imino)-4,5-dihydro-1,3,4-thiadiazol-2-yl)ethan-1-one

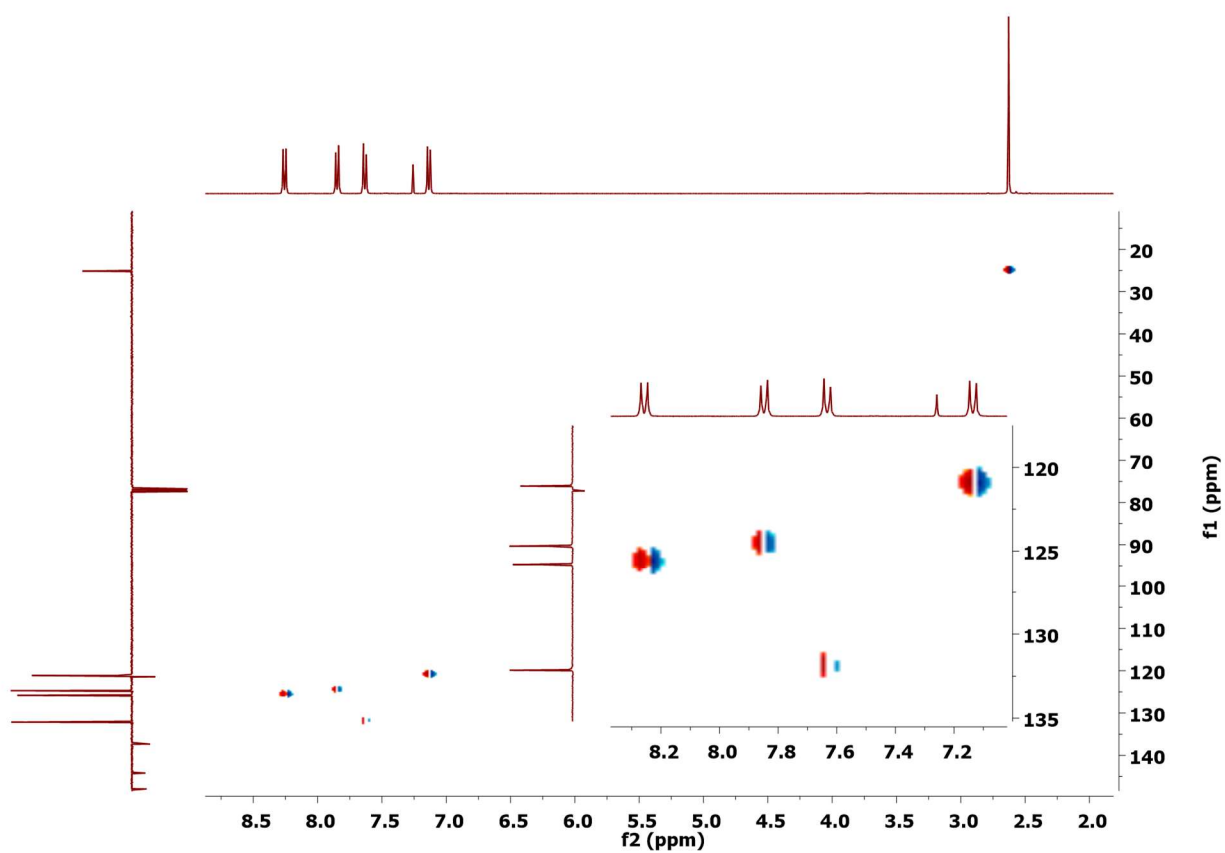

$^1\text{H}$ - $^{13}\text{C}$ -gHMBC NMR ( $\text{CDCl}_3$ ) spectrum of (Z)-1-(4-(4-bromophenyl)-5-((4-nitrophenyl)imino)-4,5-dihydro-1,3,4-thiadiazol-2-yl)ethan-1-one

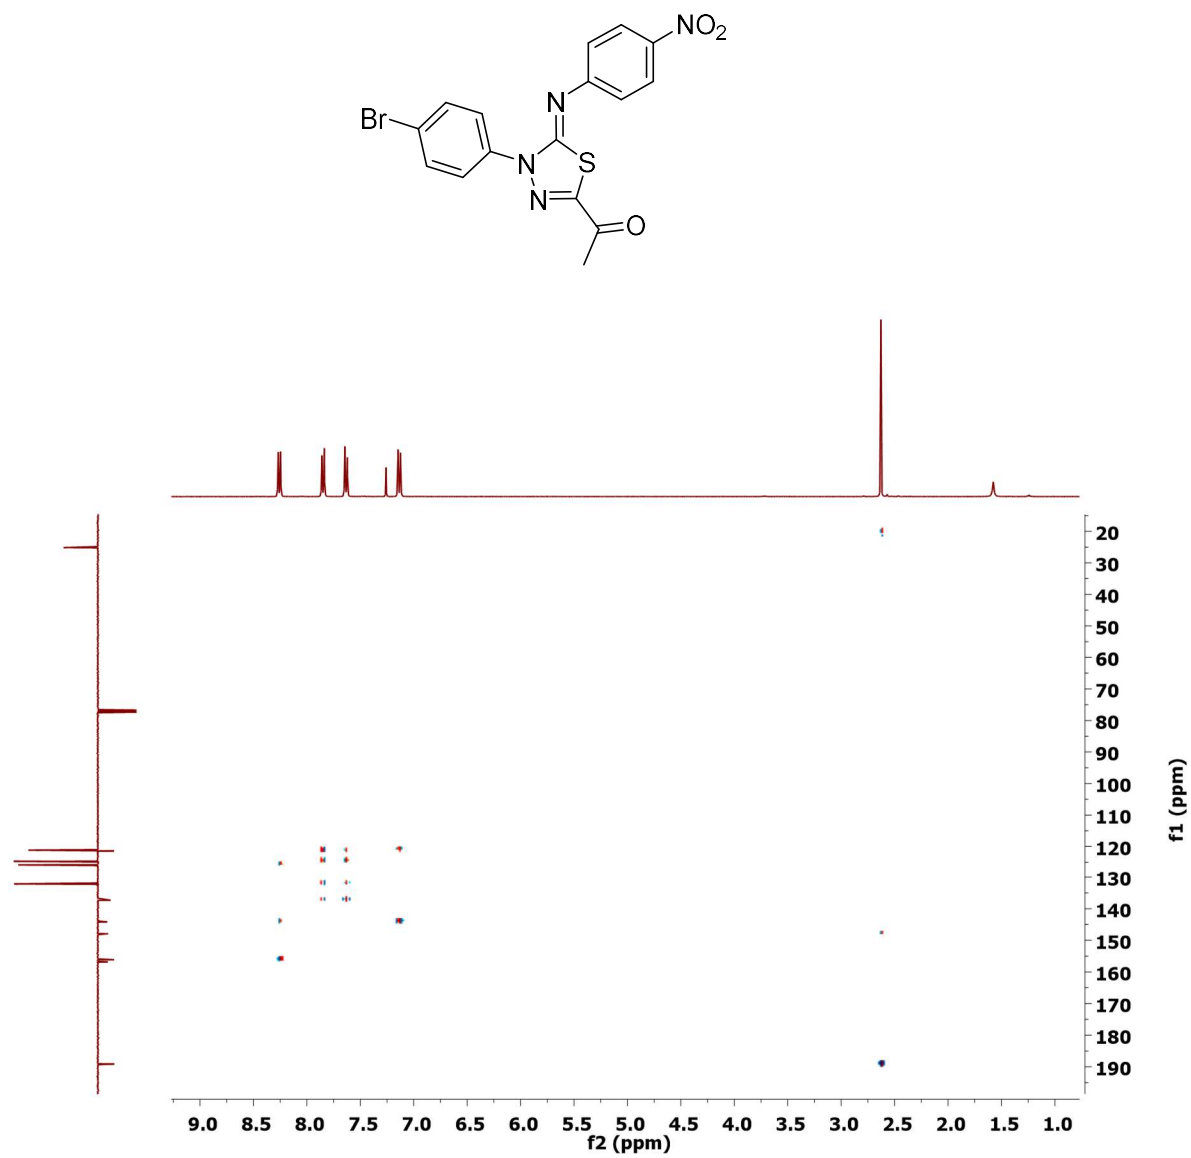

$^1\text{H}$  NMR ( $\text{CDCl}_3$ ) spectrum of (Z)-1-(4-(4-iodophenyl)-5-((4-nitrophenyl)imino)-4,5-dihydro-1,3,4-thiadiazol-2-yl)ethan-1-one

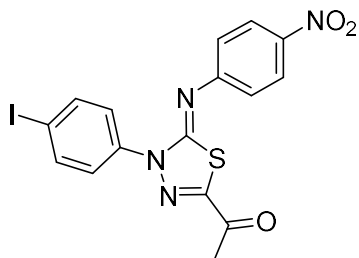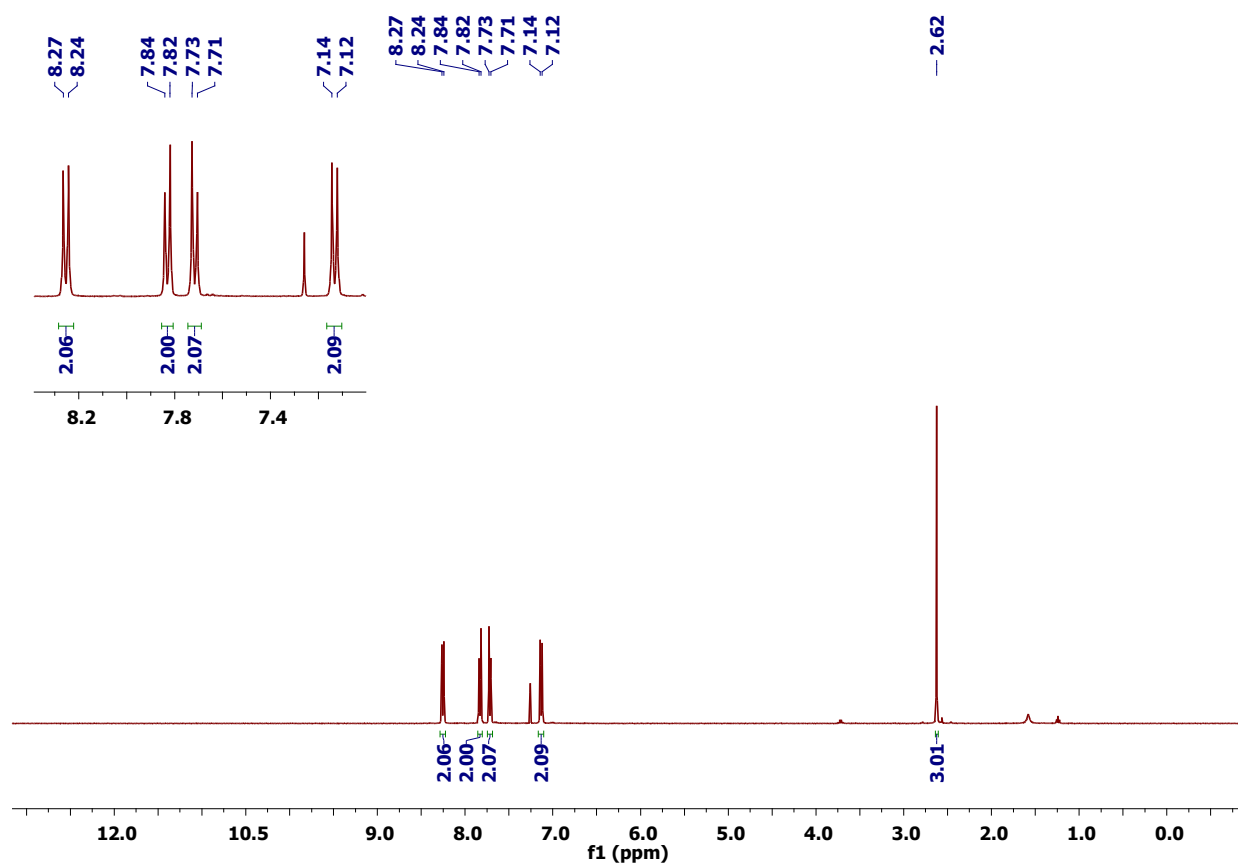

$^{13}\text{C}$  NMR ( $\text{CDCl}_3$ ) spectrum of (Z)-1-(4-(4-iodophenyl)-5-((4-nitrophenyl)imino)-4,5-dihydro-1,3,4-thiadiazol-2-yl)ethan-1-one

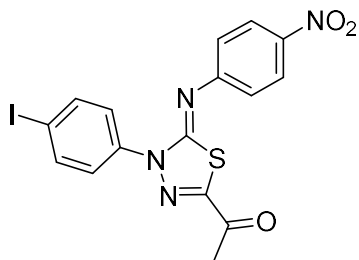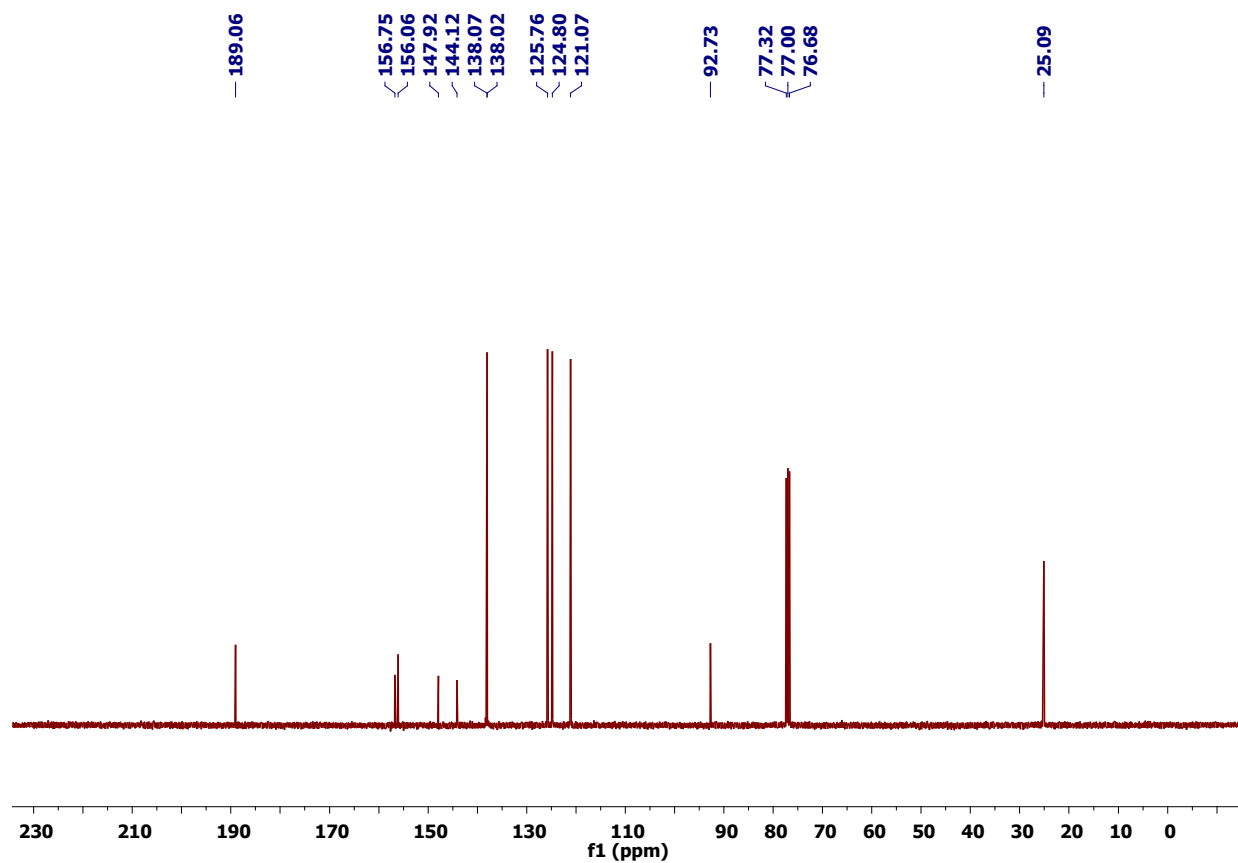

$^{13}\text{C}$  CRAPT NMR ( $\text{CDCl}_3$ ) spectrum of (Z)-1-(4-(4-iodophenyl)-5-((4-nitrophenyl)imino)-4,5-dihydro-1,3,4-thiadiazol-2-yl)ethan-1-one

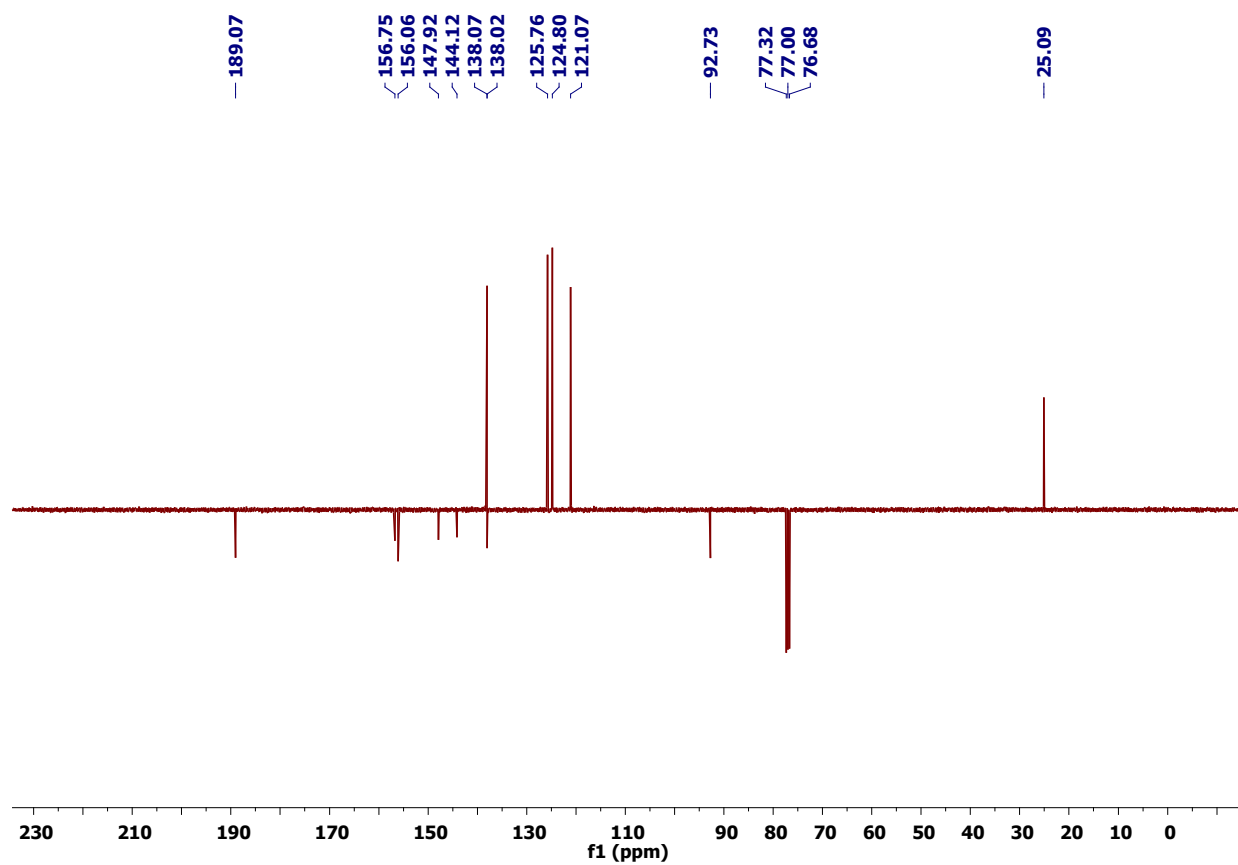

$^1\text{H}$ - $^1\text{H}$  gDQCOSY NMR ( $\text{CDCl}_3$ ) spectrum of (Z)-1-(4-(4-iodophenyl)-5-((4-nitrophenyl)imino)-4,5-dihydro-1,3,4-thiadiazol-2-yl)ethan-1-one

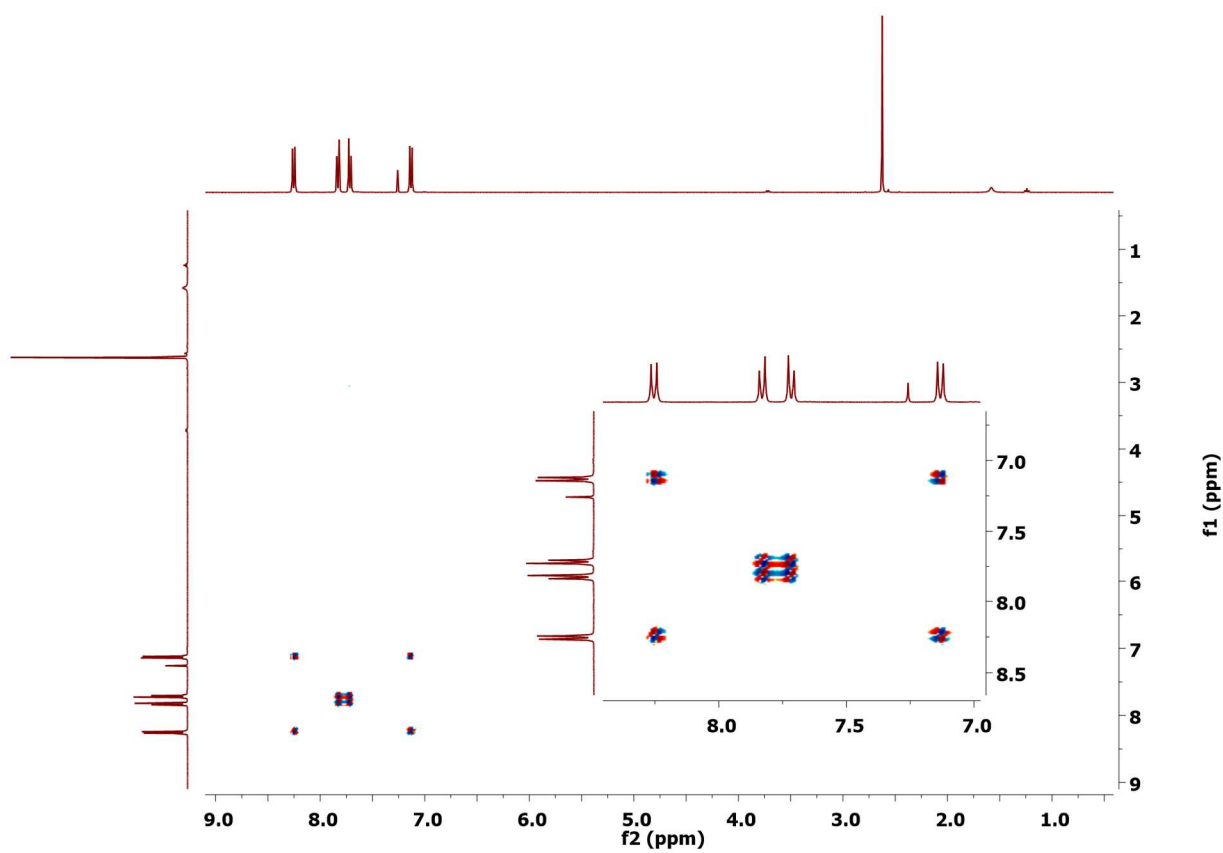

$^1\text{H}$ - $^{13}\text{C}$ -HSQC NMR ( $\text{CDCl}_3$ ) spectrum of (Z)-1-(4-(4-iodophenyl)-5-((4-nitrophenyl)imino)-4,5-dihydro-1,3,4-thiadiazol-2-yl)ethan-1-one

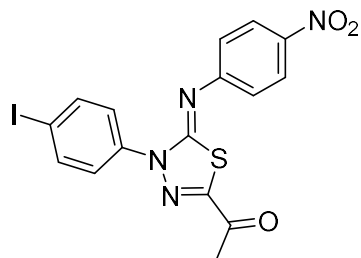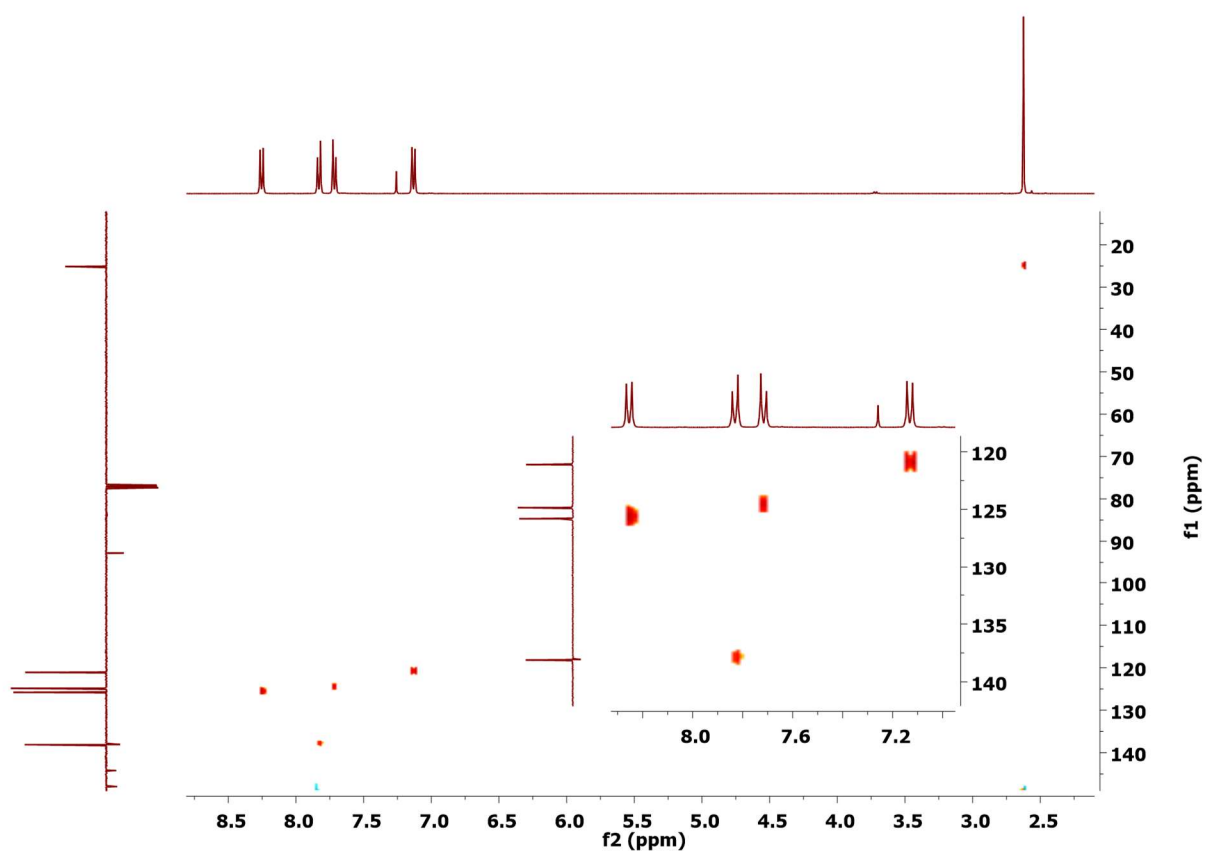



$^1\text{H}$ - $^{13}\text{C}$ -gHMBC NMR ( $\text{CDCl}_3$ ) spectrum of (Z)-1-(4-(4-iodophenyl)-5-((4-nitrophenyl)imino)-4,5-dihydro-1,3,4-thiadiazol-2-yl)ethan-1-one

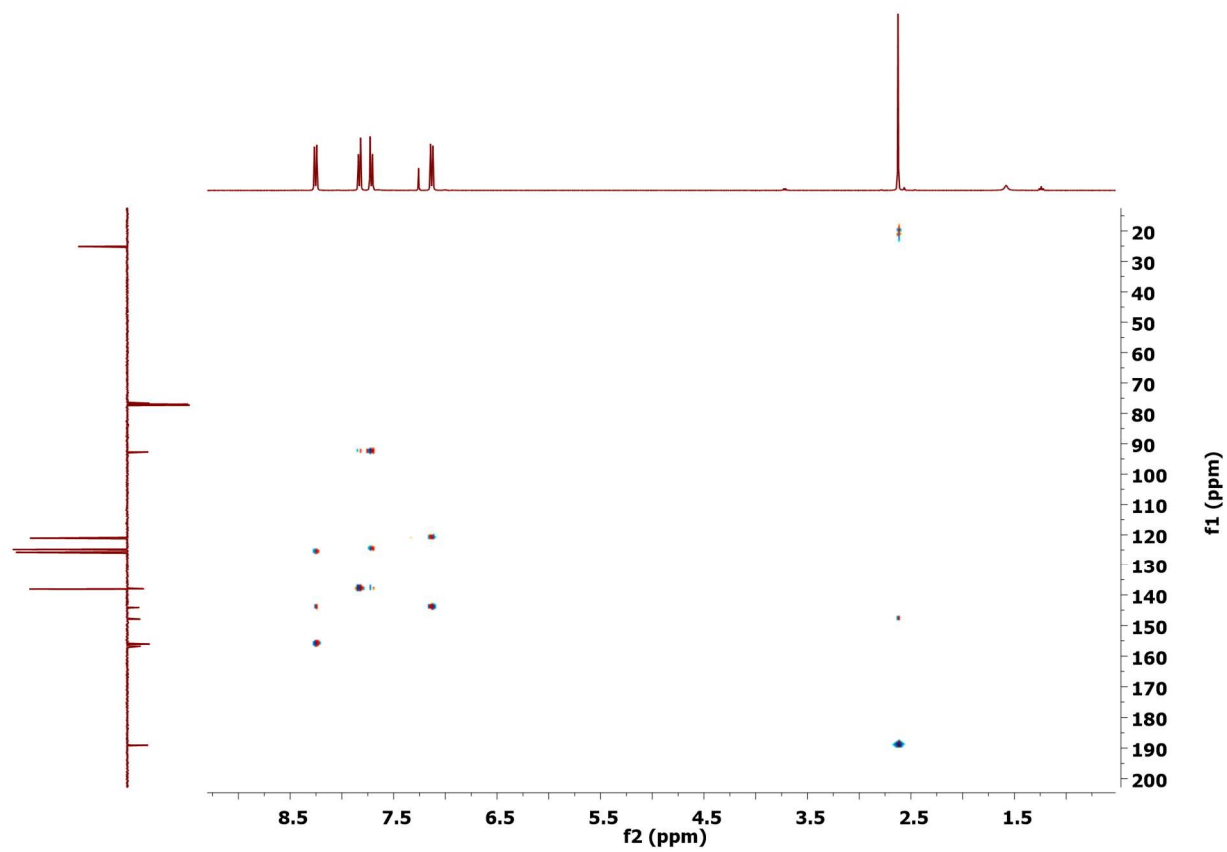

$^1\text{H}$  NMR ( $\text{CDCl}_3$ ) spectrum of (Z)-1-(5-((4-nitrophenyl)imino)-4-(p-tolyl)-4,5-dihydro-1,3,4-thiadiazol-2-yl)ethan-1-one

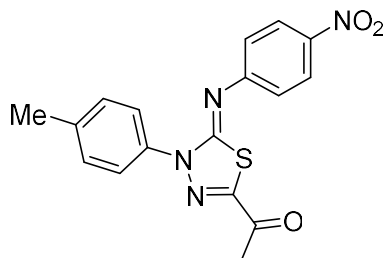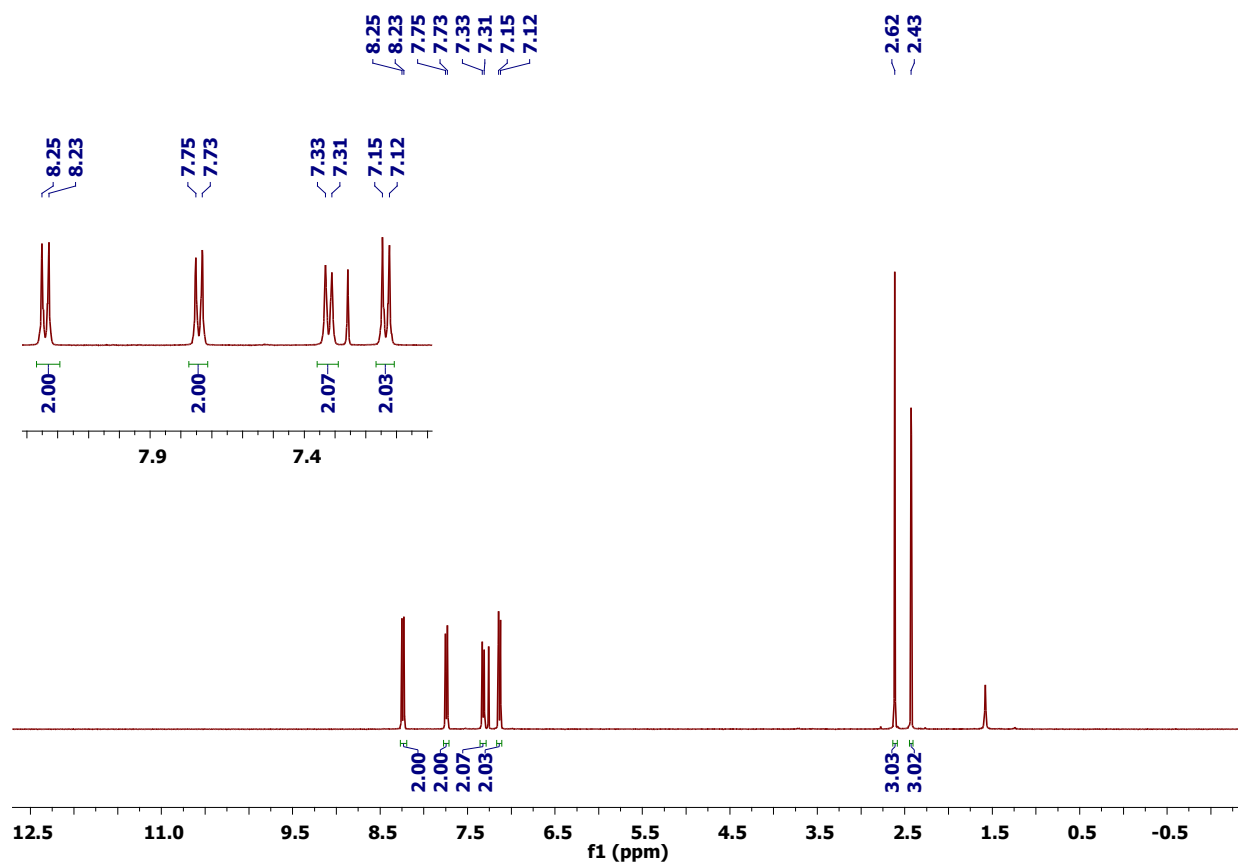

$^{13}\text{C}$  NMR ( $\text{CDCl}_3$ ) spectrum of (Z)-1-(5-((4-nitrophenyl)imino)-4-(p-tolyl)-4,5-dihydro-1,3,4-thiadiazol-2-yl)ethan-1-one

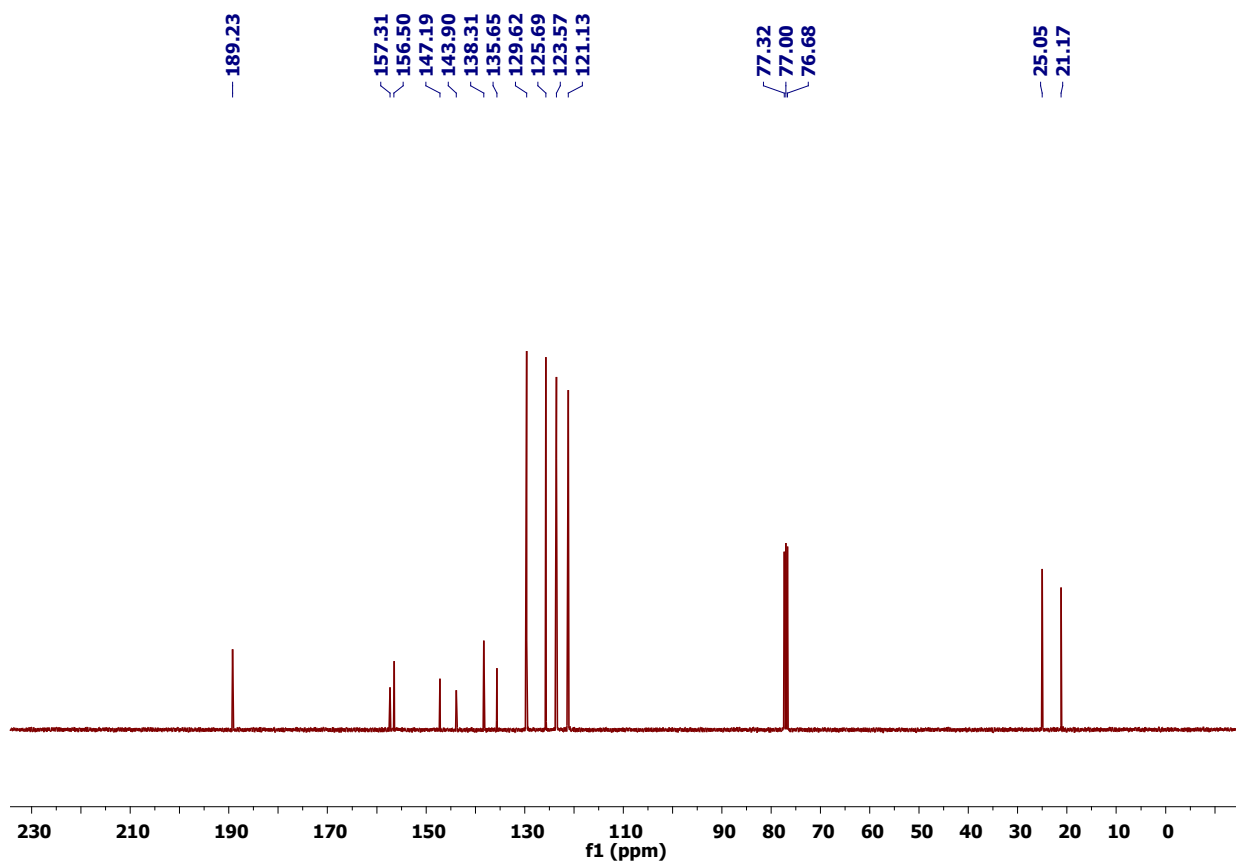

$^{13}\text{C}$  CRAPT NMR ( $\text{CDCl}_3$ ) spectrum of (Z)-1-(5-((4-nitrophenyl)imino)-4-(p-tolyl)-4,5-dihydro-1,3,4-thiadiazol-2-yl)ethan-1-one

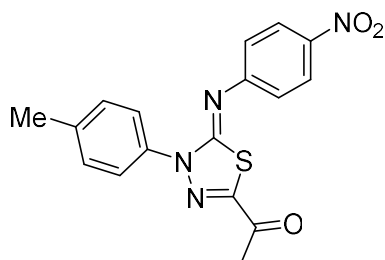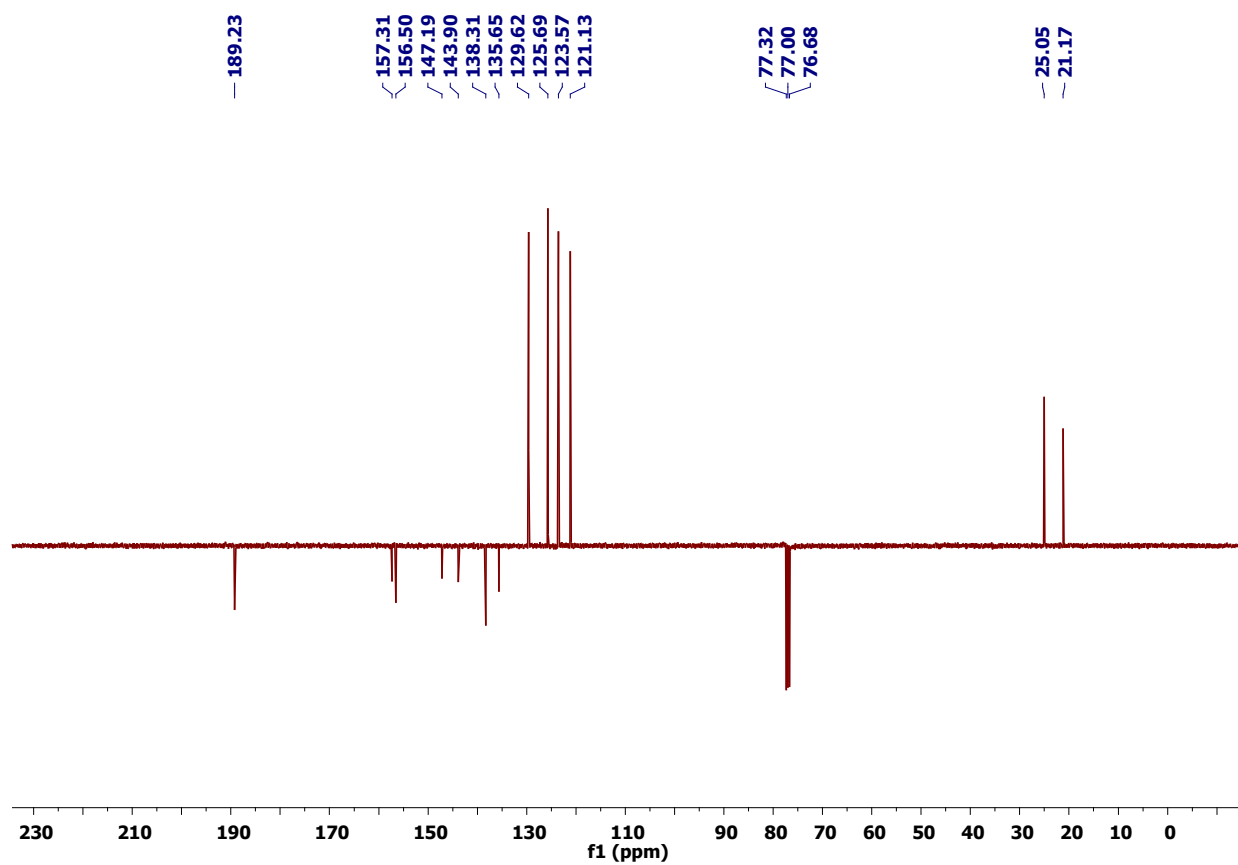

$^1\text{H}$ - $^1\text{H}$  gDQCOSY NMR ( $\text{CDCl}_3$ ) spectrum of (Z)-1-(5-((4-nitrophenyl)imino)-4-(p-tolyl)-4,5-dihydro-1,3,4-thiadiazol-2-yl)ethan-1-one

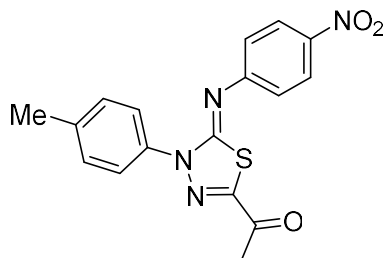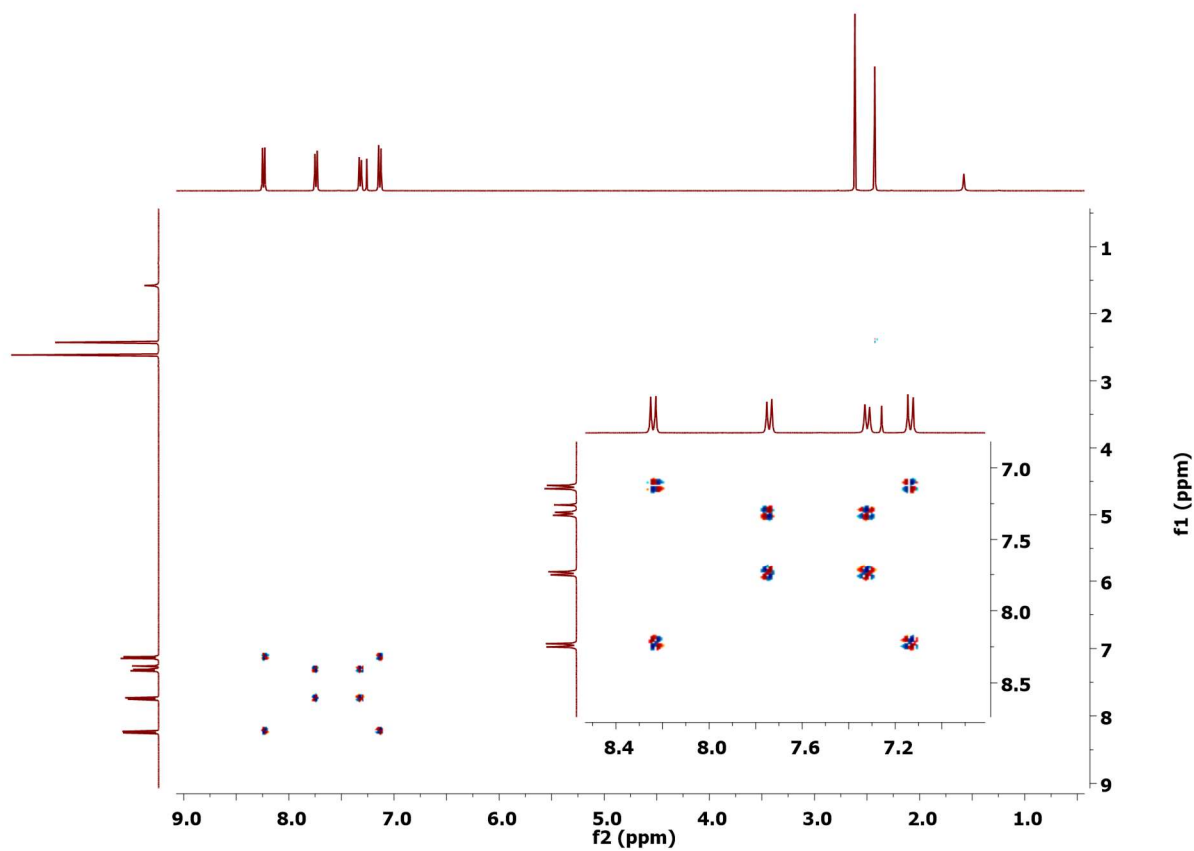

$^1\text{H}$ - $^{13}\text{C}$ -HSQC NMR ( $\text{CDCl}_3$ ) spectrum of (Z)-1-(5-((4-nitrophenyl)imino)-4-(p-tolyl)-4,5-dihydro-1,3,4-thiadiazol-2-yl)ethan-1-one

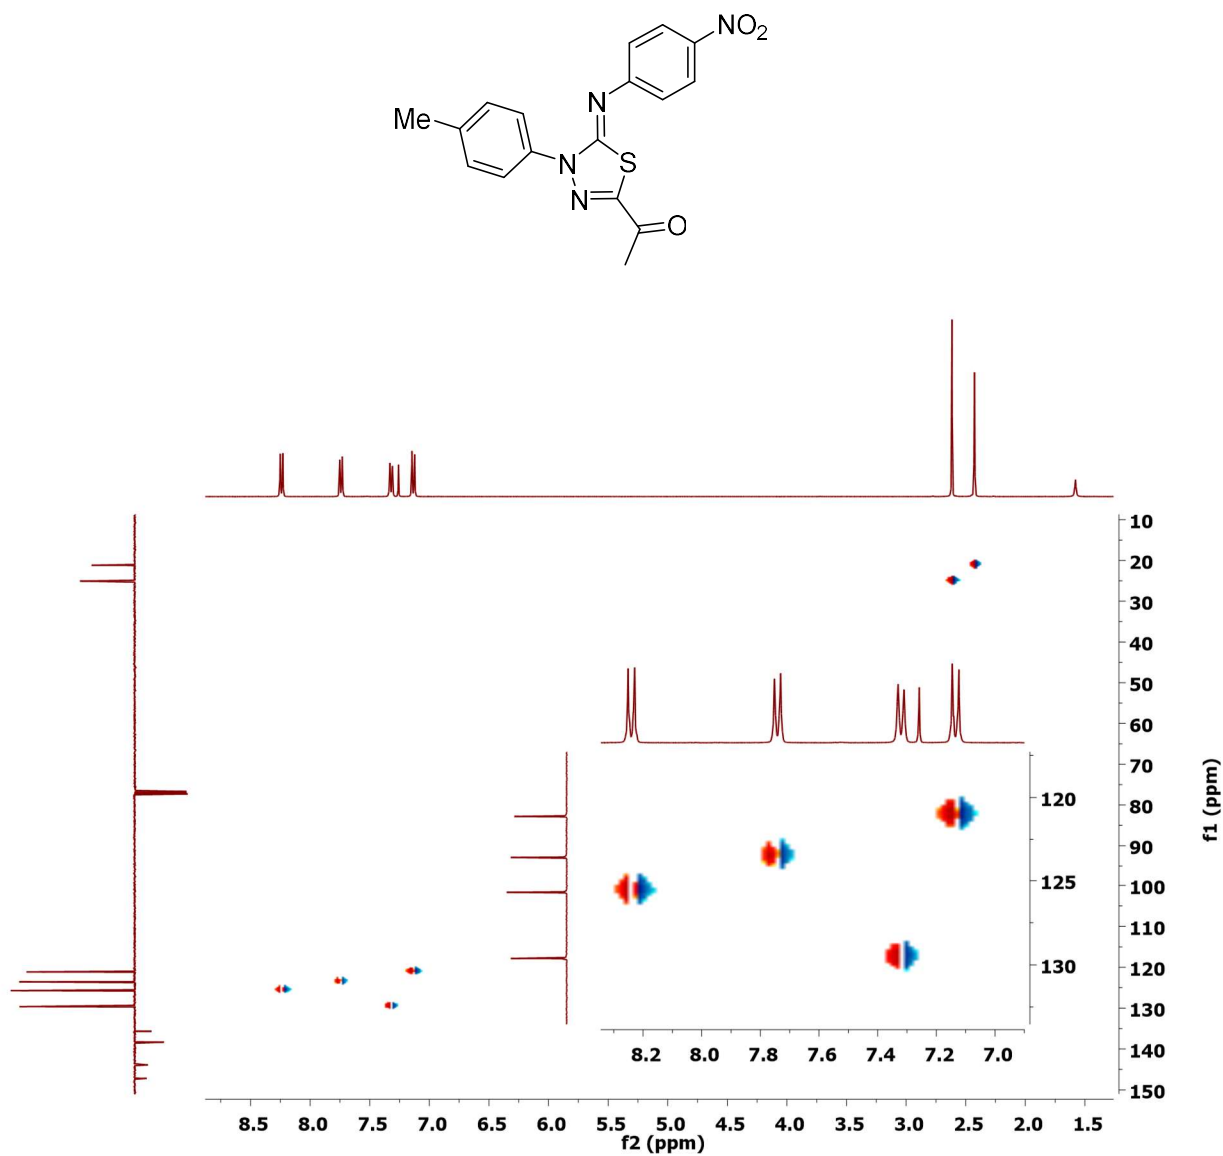

$^1\text{H}$ - $^{13}\text{C}$ -gHMBC NMR ( $\text{CDCl}_3$ ) spectrum of (Z)-1-(5-((4-nitrophenyl)imino)-4-(p-tolyl)-4,5-dihydro-1,3,4-thiadiazol-2-yl)ethan-1-one

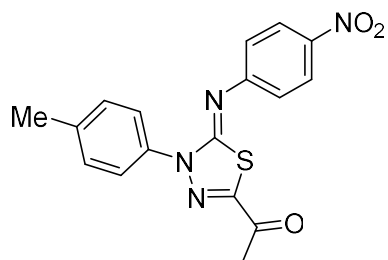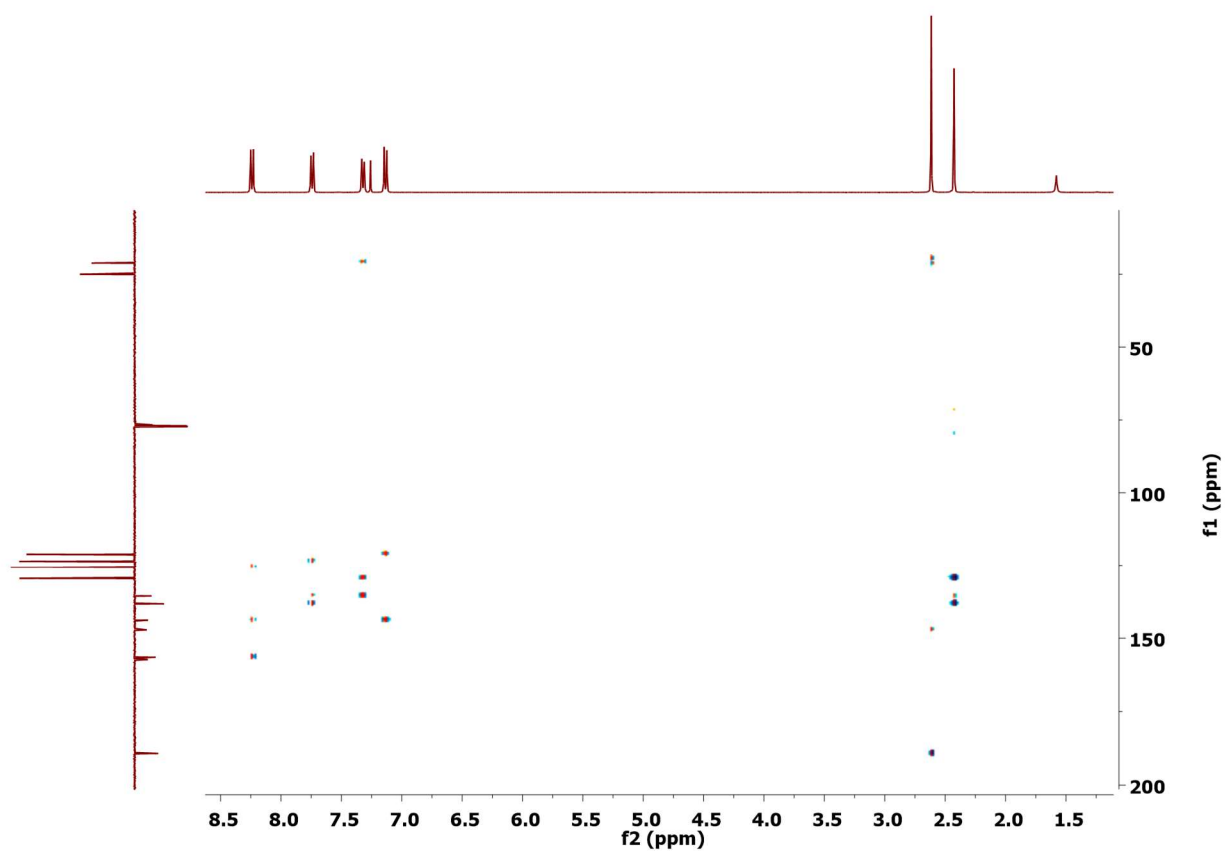

$^1\text{H}$  NMR ( $\text{CDCl}_3$ ) spectrum of (Z)-1-(5-((4-nitrophenyl)imino)-4-phenyl-4,5-dihydro-1,3,4-thiadiazol-2-yl)ethan-1-one

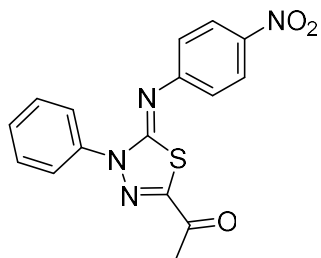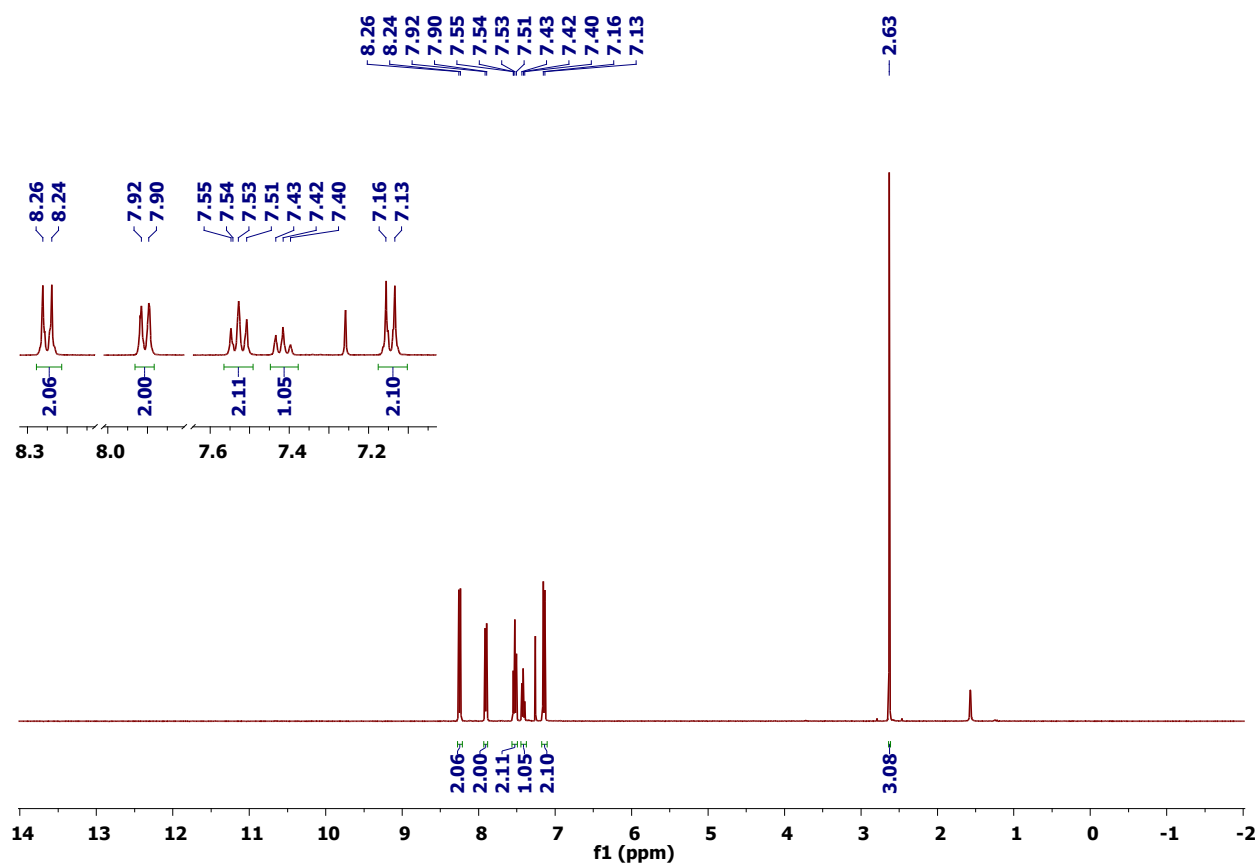



$^{13}\text{C}$  NMR ( $\text{CDCl}_3$ ) spectrum of (Z)-1-(5-((4-nitrophenyl)imino)-4-phenyl-4,5-dihydro-1,3,4-thiadiazol-2-yl)ethan-1-one

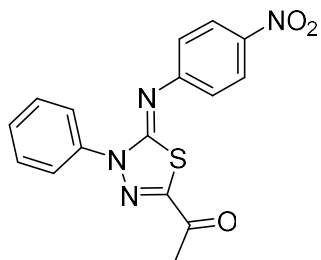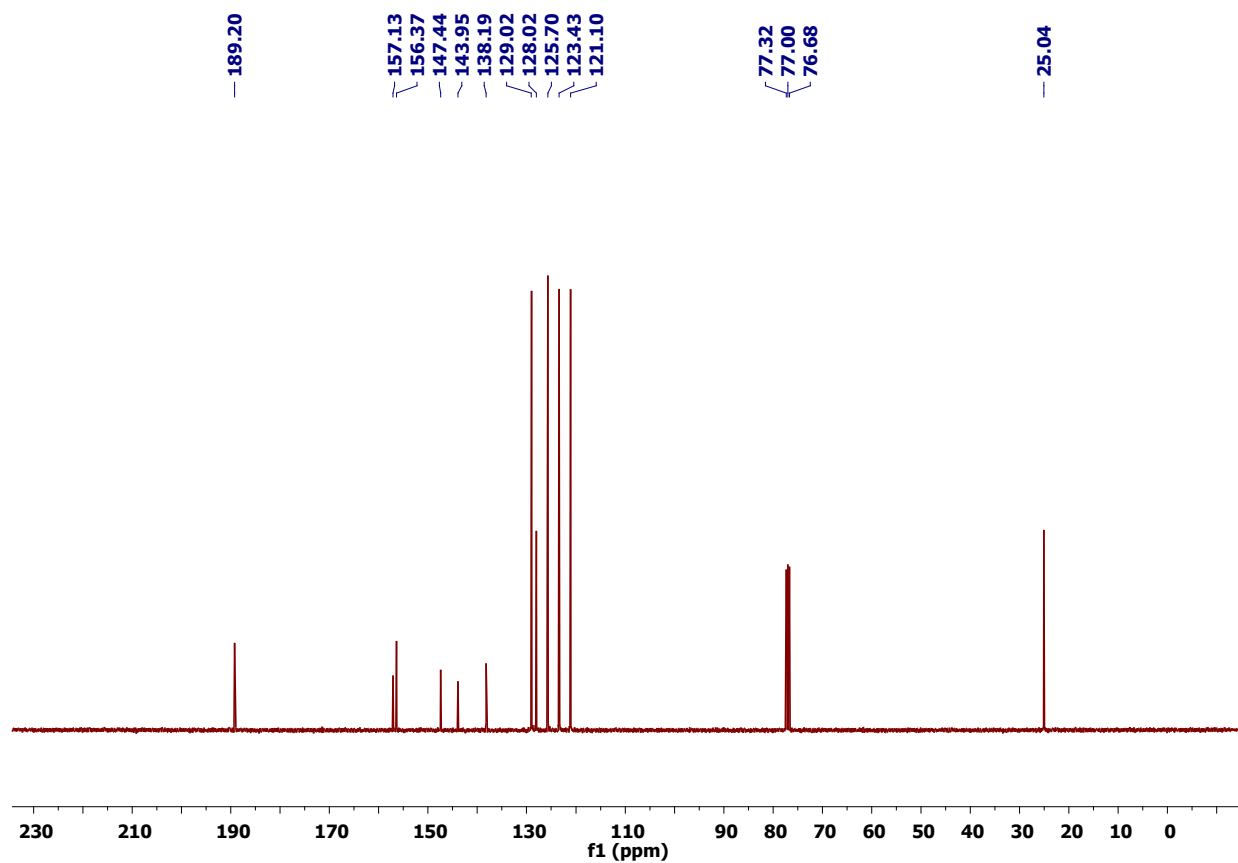

$^{13}\text{C}$  CRAPT NMR ( $\text{CDCl}_3$ ) spectrum of (Z)-1-(5-((4-nitrophenyl)imino)-4-phenyl-4,5-dihydro-1,3,4-thiadiazol-2-yl)ethan-1-one

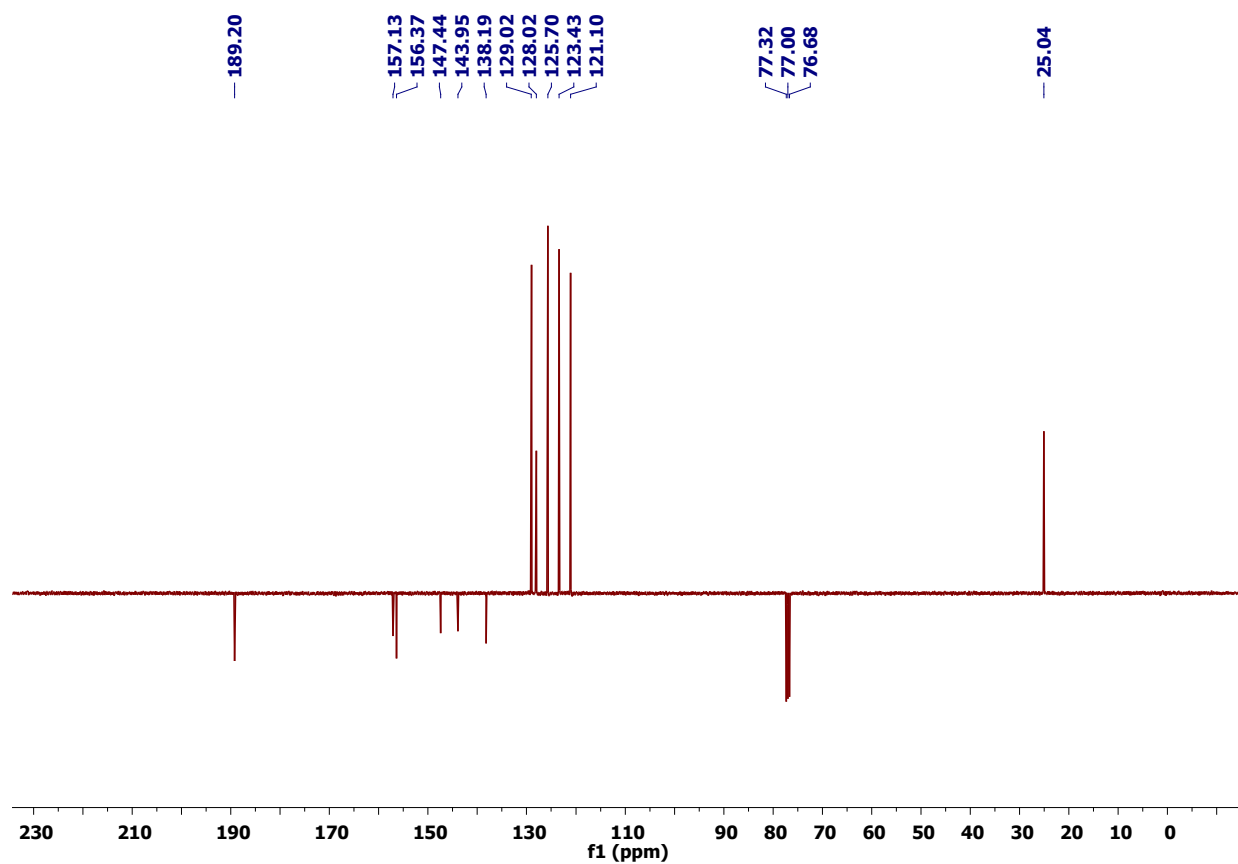

$^1\text{H}$ - $^1\text{H}$  gDQCOSY NMR ( $\text{CDCl}_3$ ) spectrum of (Z)-1-(5-((4-nitrophenyl)imino)-4-phenyl-4,5-dihydro-1,3,4-thiadiazol-2-yl)ethan-1-one

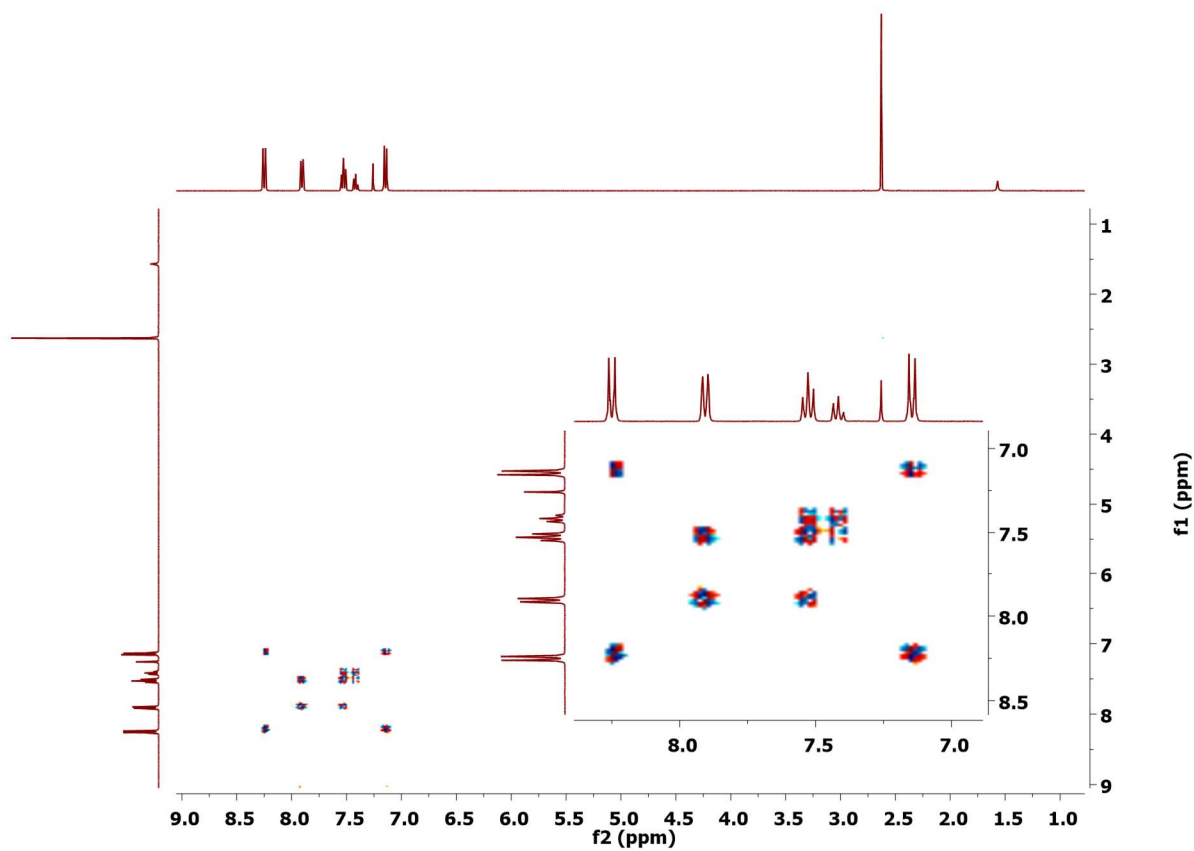

$^1\text{H}$ - $^{13}\text{C}$ -HSQC NMR ( $\text{CDCl}_3$ ) spectrum of (Z)-1-(5-((4-nitrophenyl)imino)-4-phenyl-4,5-dihydro-1,3,4-thiadiazol-2-yl)ethan-1-one

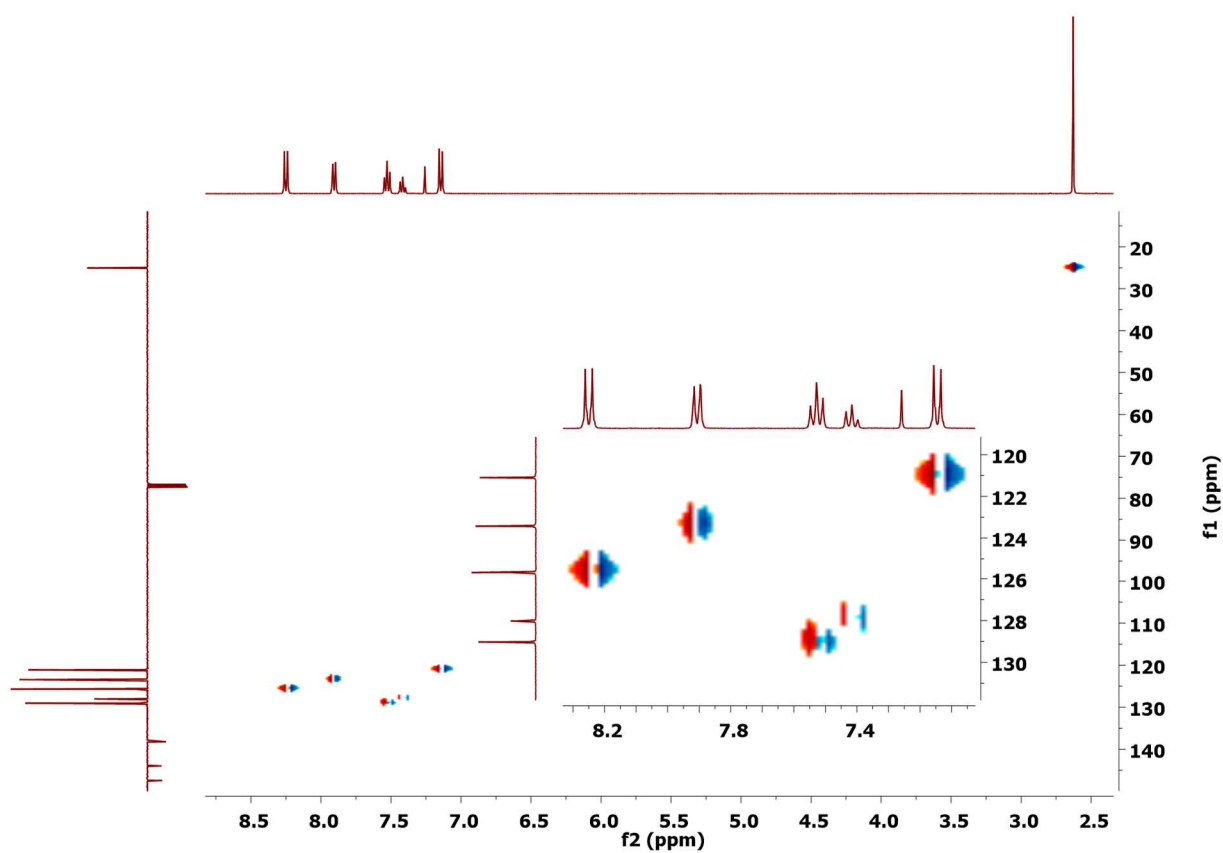

$^1\text{H}$ - $^{13}\text{C}$ -gHMBC NMR ( $\text{CDCl}_3$ ) spectrum of (Z)-1-(5-((4-nitrophenyl)imino)-4-phenyl-4,5-dihydro-1,3,4-thiadiazol-2-yl)ethan-1-one

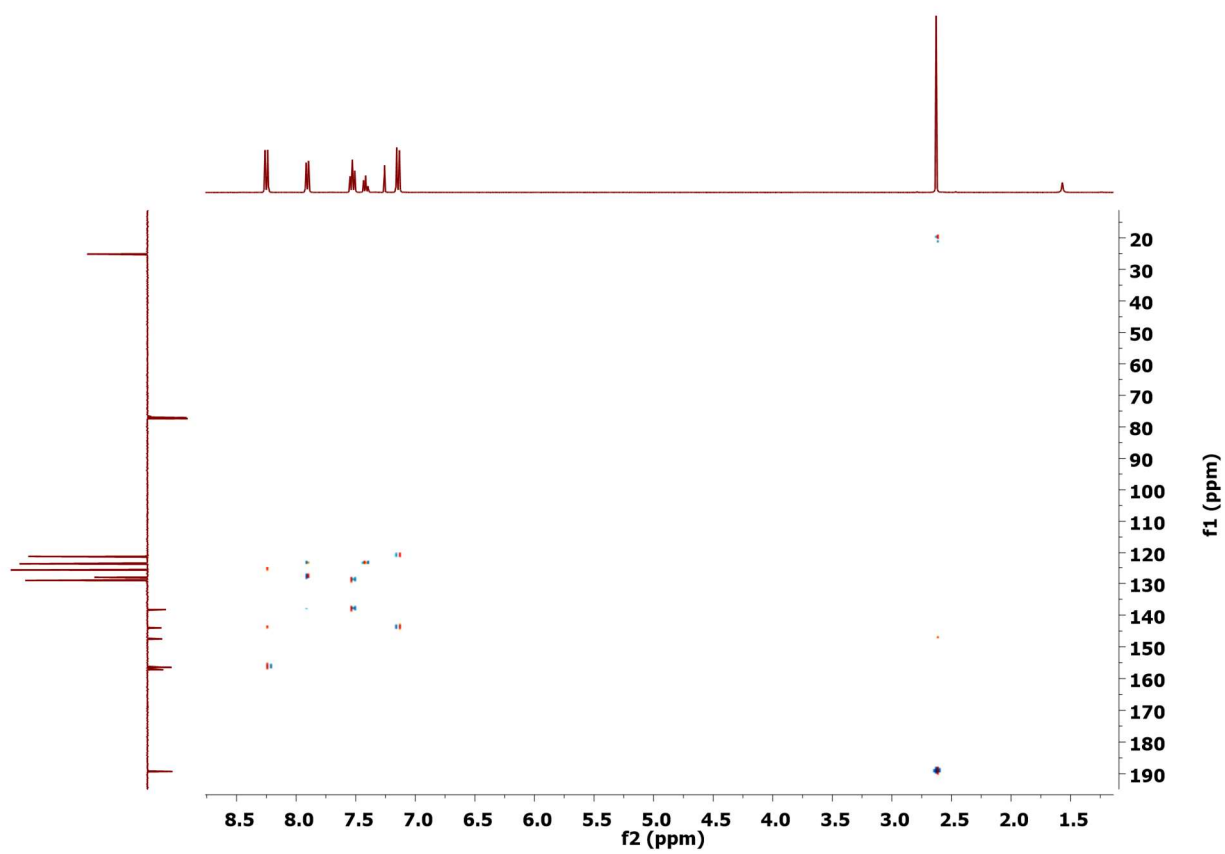

$^1\text{H}$  NMR ( $\text{CDCl}_3$ ) spectrum of (Z)-1-(4-(4-(methylthio)phenyl)-5-((4-nitrophenyl)imino)-4,5-dihydro-1,3,4-thiadiazol-2-yl)ethan-1-one

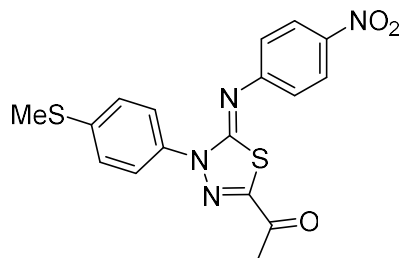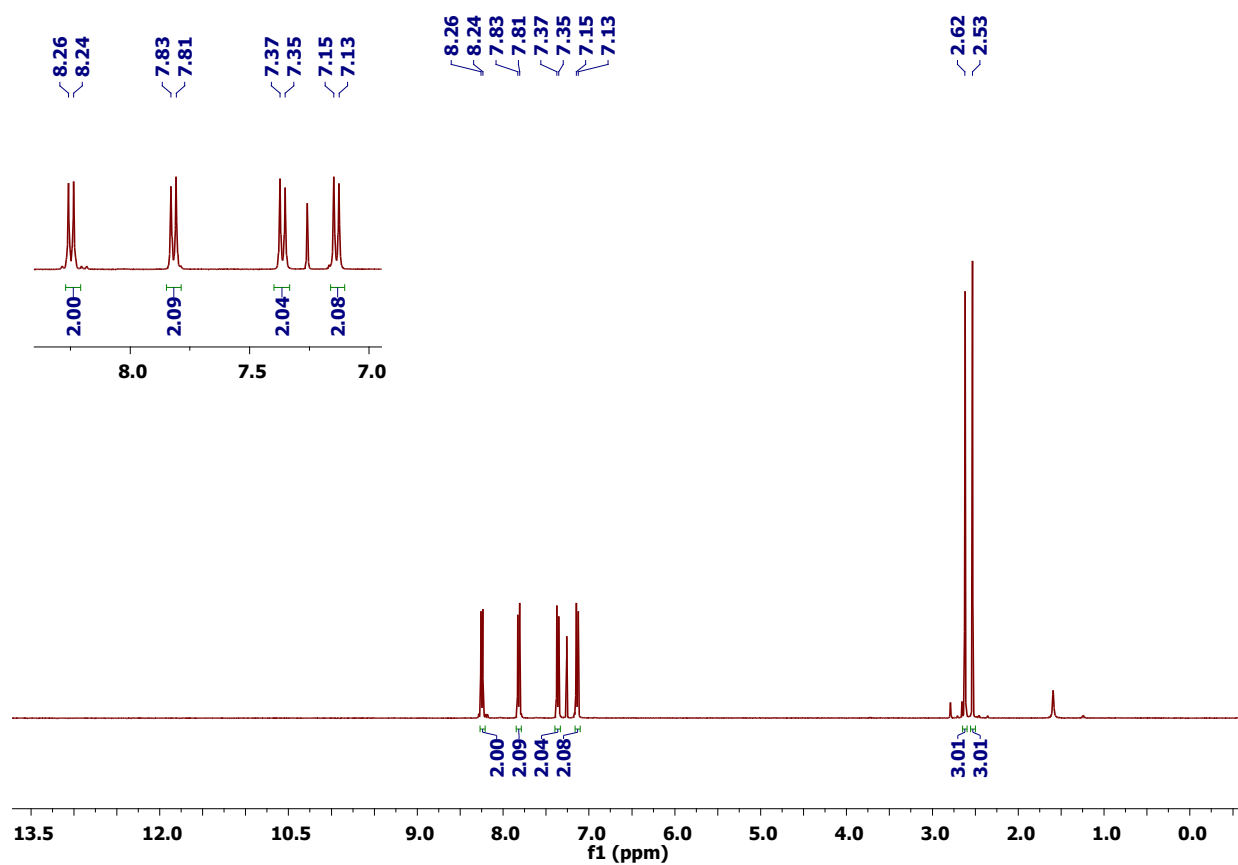

$^{13}\text{C}$  NMR ( $\text{CDCl}_3$ ) spectrum of (Z)-1-(4-(4-(methylthio)phenyl)-5-((4-nitrophenyl)imino)-4,5-dihydro-1,3,4-thiadiazol-2-yl)ethan-1-one

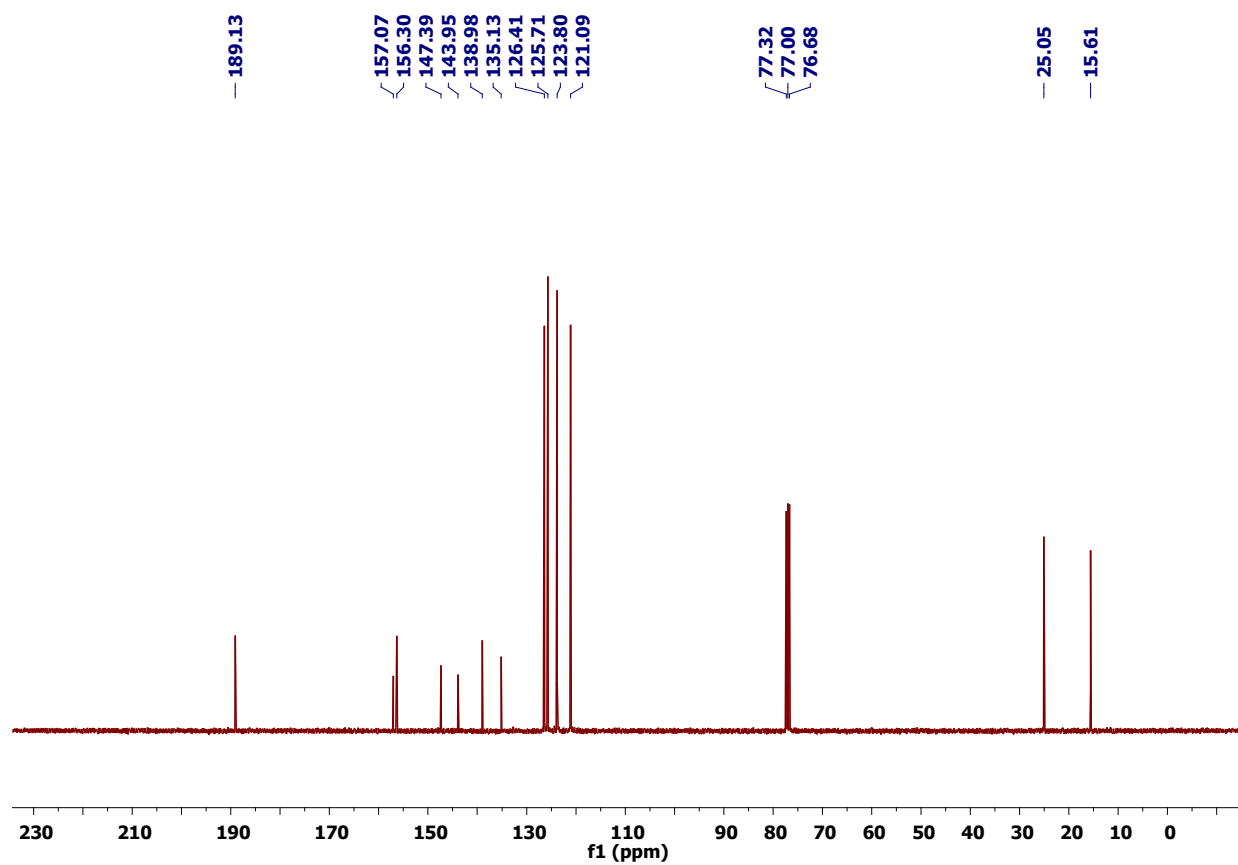

$^{13}\text{C}$  CRAPT NMR ( $\text{CDCl}_3$ ) spectrum of (Z)-1-(4-(4-(methylthio)phenyl)-5-((4-nitrophenyl)imino)-4,5-dihydro-1,3,4-thiadiazol-2-yl)ethan-1-one

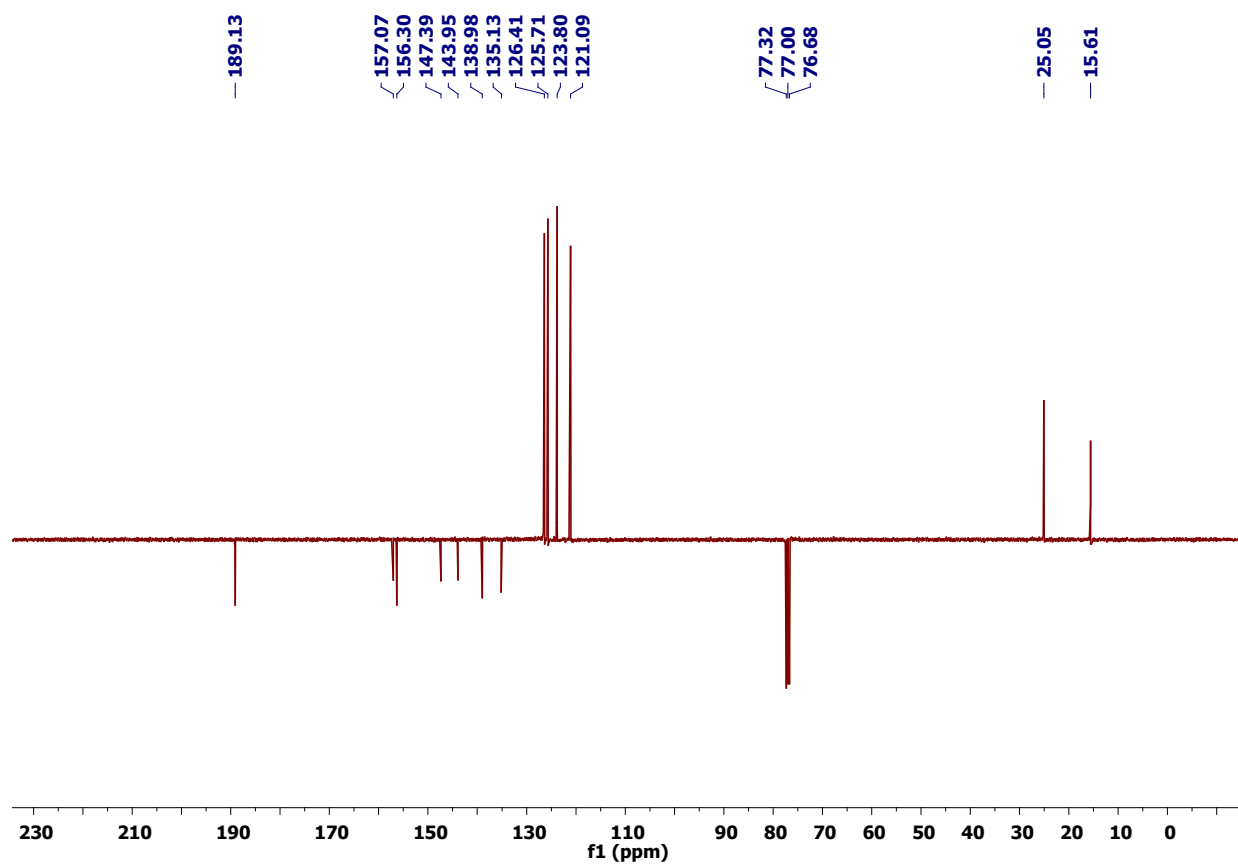



$^1\text{H}$ - $^1\text{H}$  gDQCOSY NMR ( $\text{CDCl}_3$ ) spectrum of (Z)-1-(4-(4-(methylthio)phenyl)-5-((4-nitrophenyl)imino)-4,5-dihydro-1,3,4-thiadiazol-2-yl)ethan-1-one

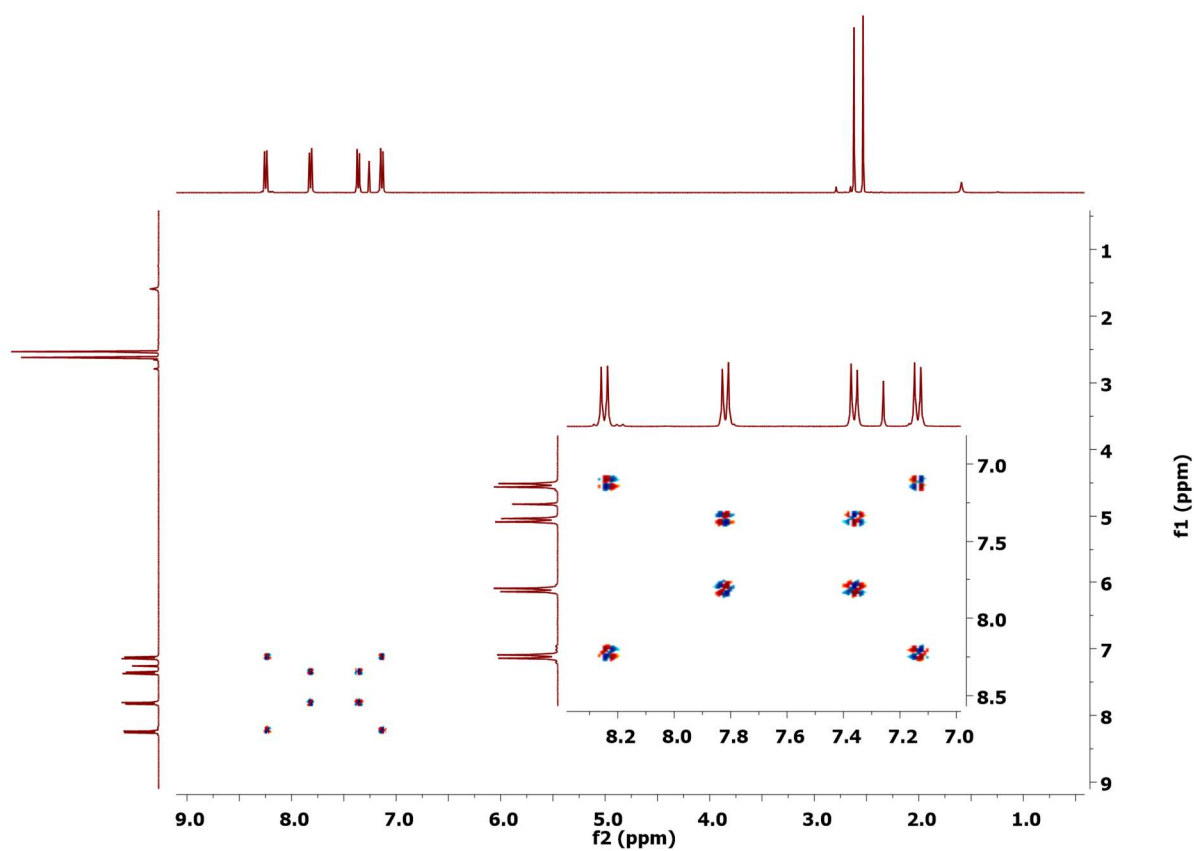

$^1\text{H}$ - $^{13}\text{C}$ -HSQC NMR ( $\text{CDCl}_3$ ) spectrum of (Z)-1-(4-(4-(methylthio)phenyl)-5-((4-nitrophenyl)imino)-4,5-dihydro-1,3,4-thiadiazol-2-yl)ethan-1-one

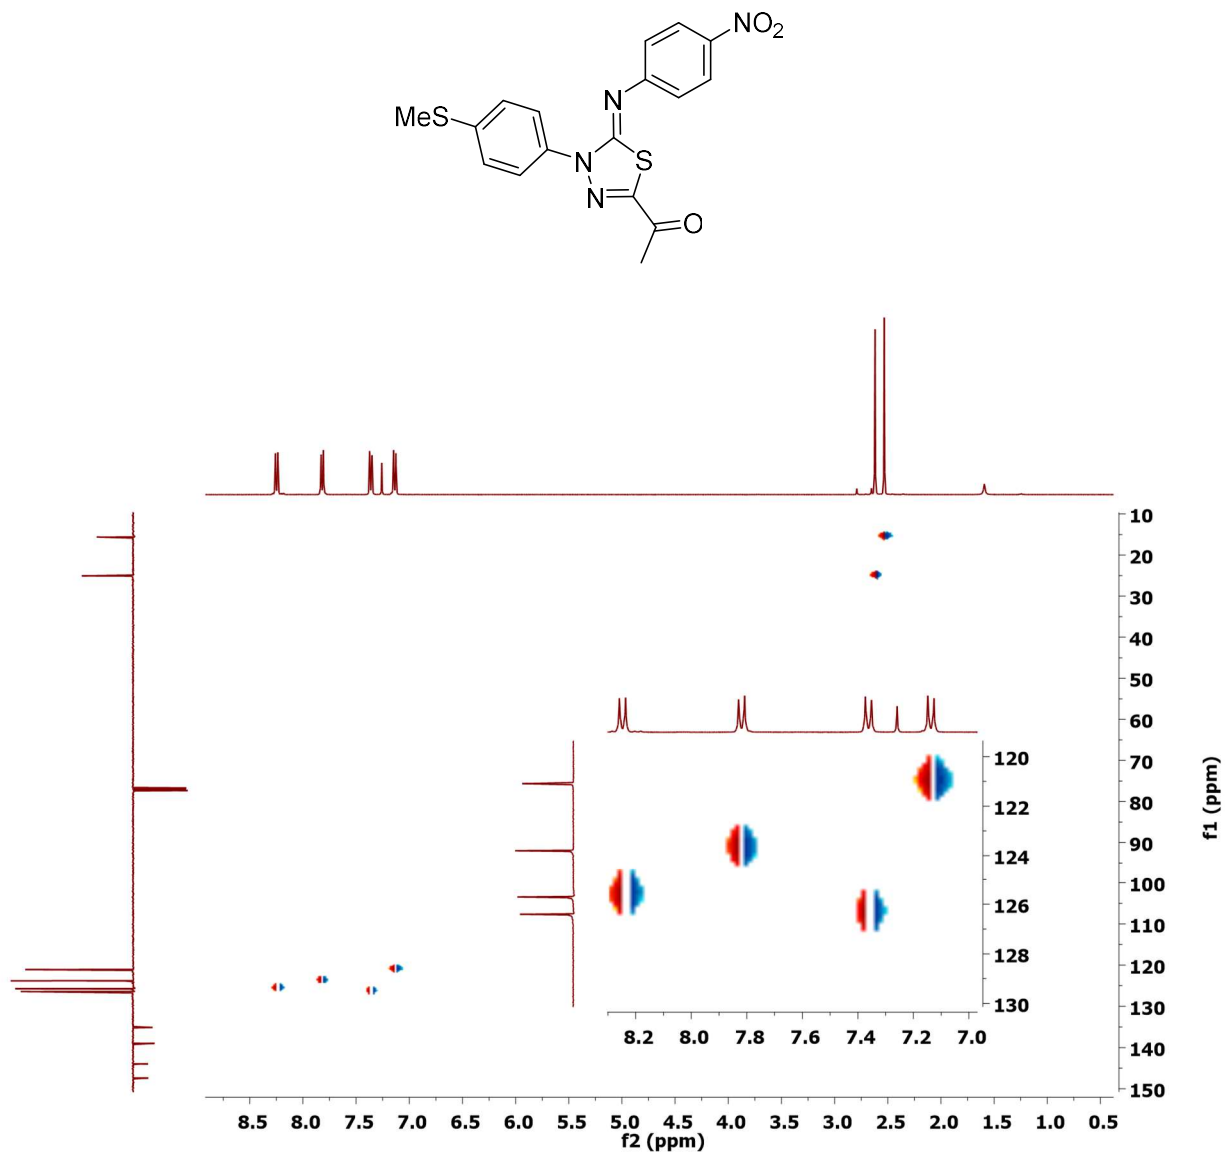

$^1\text{H}$ - $^{13}\text{C}$ -gHMBC NMR ( $\text{CDCl}_3$ ) spectrum of (Z)-1-(4-(4-(methylthio)phenyl)-5-((4-nitrophenyl)imino)-4,5-dihydro-1,3,4-thiadiazol-2-yl)ethan-1-one

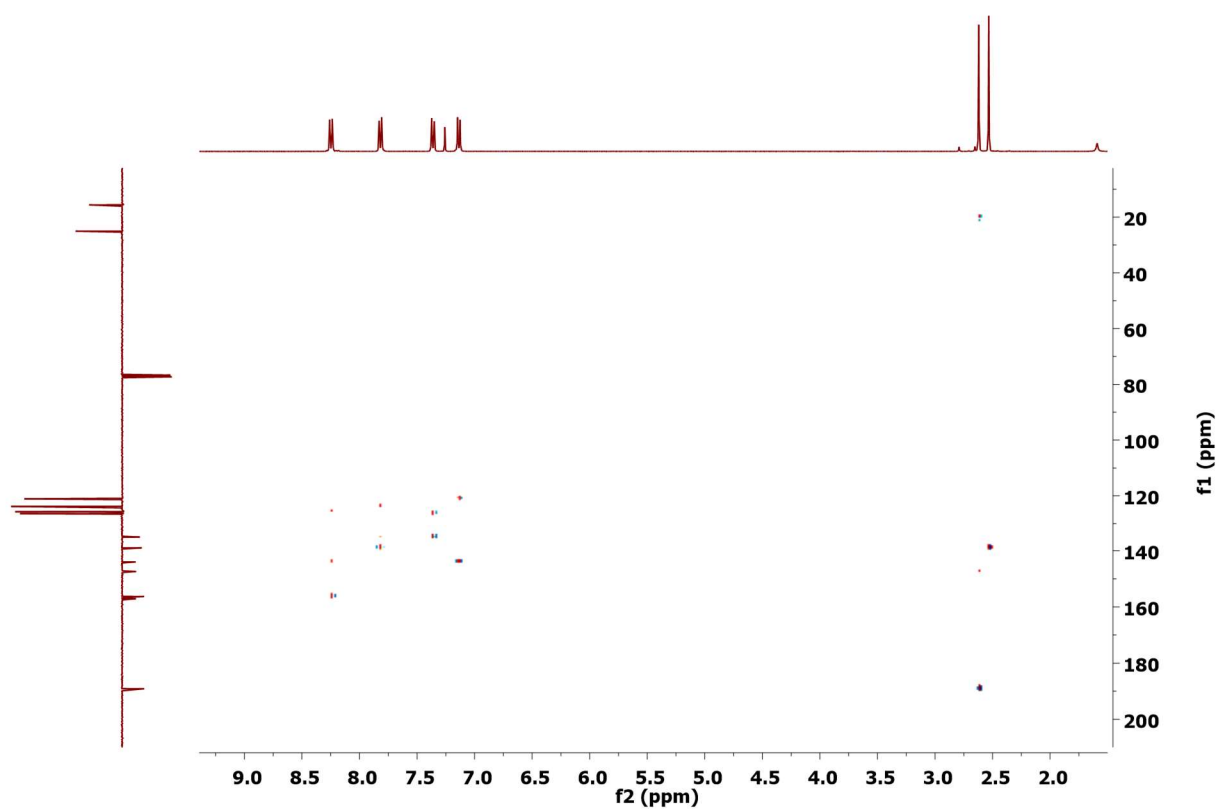

$^1\text{H}$  NMR ( $\text{CDCl}_3$ ) spectrum of (Z)-1-(4-(4-methoxyphenyl)-5-((4-nitrophenyl)imino)-4,5-dihydro-1,3,4-thiadiazol-2-yl)ethan-1-one

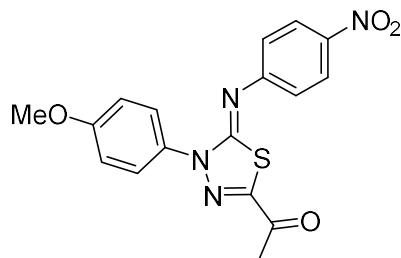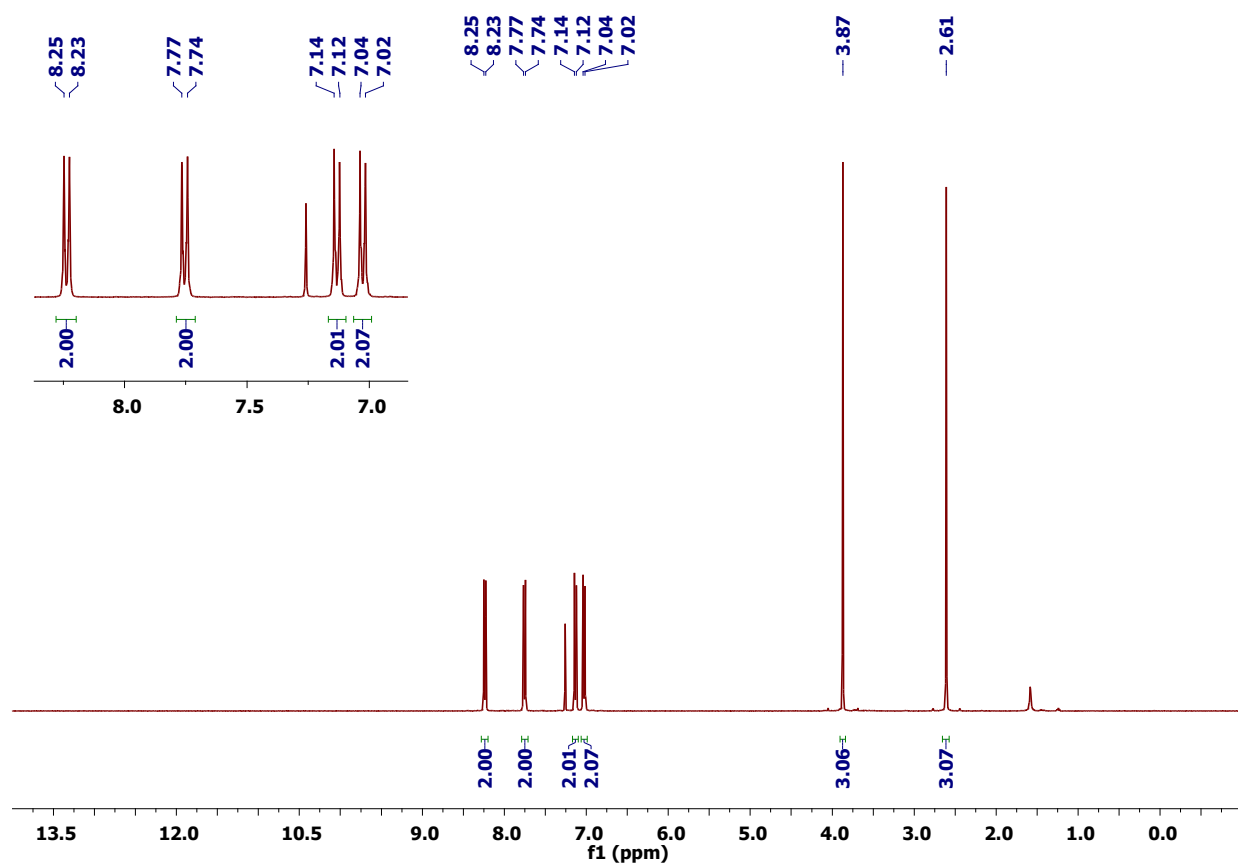

$^{13}\text{C}$  NMR ( $\text{CDCl}_3$ ) spectrum of (Z)-1-(4-(4-methoxyphenyl)-5-((4-nitrophenyl)imino)-4,5-dihydro-1,3,4-thiadiazol-2-yl)ethan-1-one

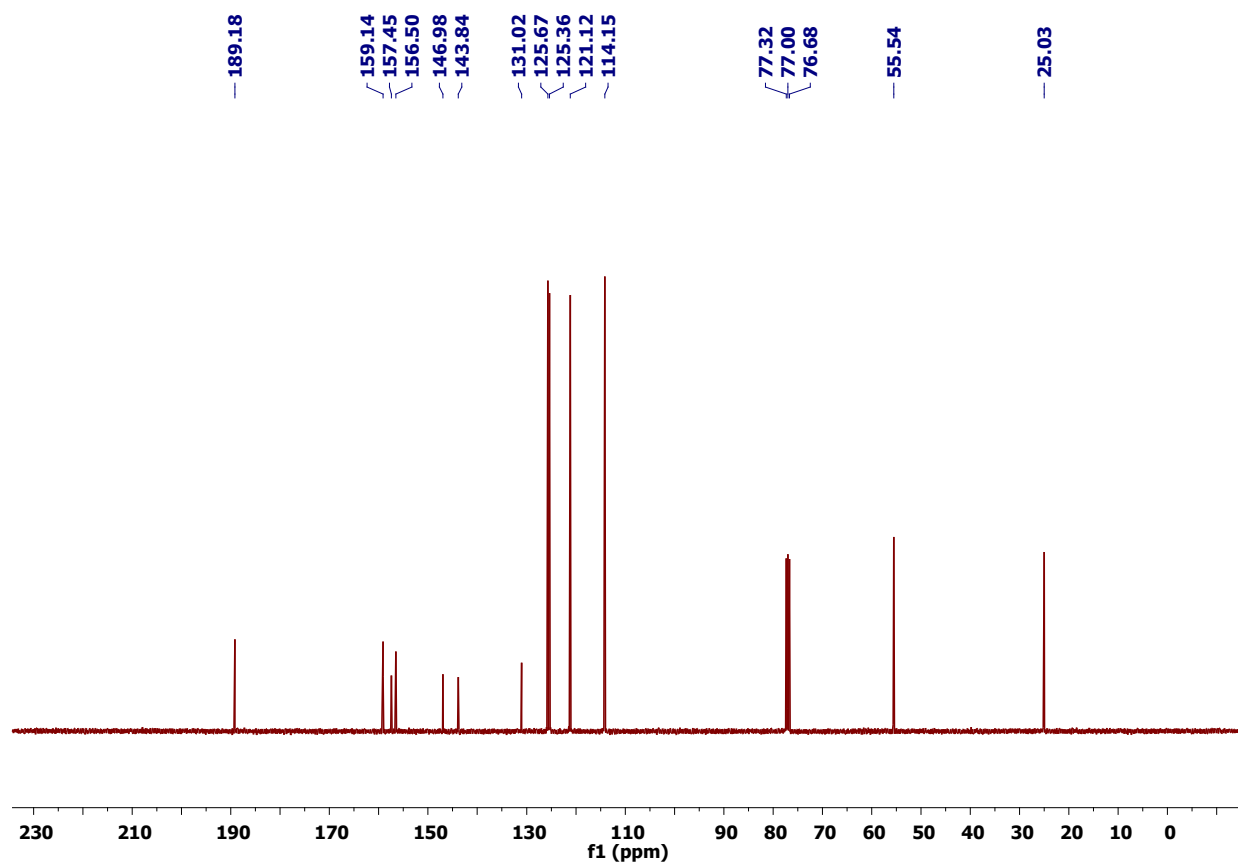

$^{13}\text{C}$  CRAPT NMR ( $\text{CDCl}_3$ ) spectrum of (Z)-1-(4-(4-methoxyphenyl)-5-((4-nitrophenyl)imino)-4,5-dihydro-1,3,4-thiadiazol-2-yl)ethan-1-one

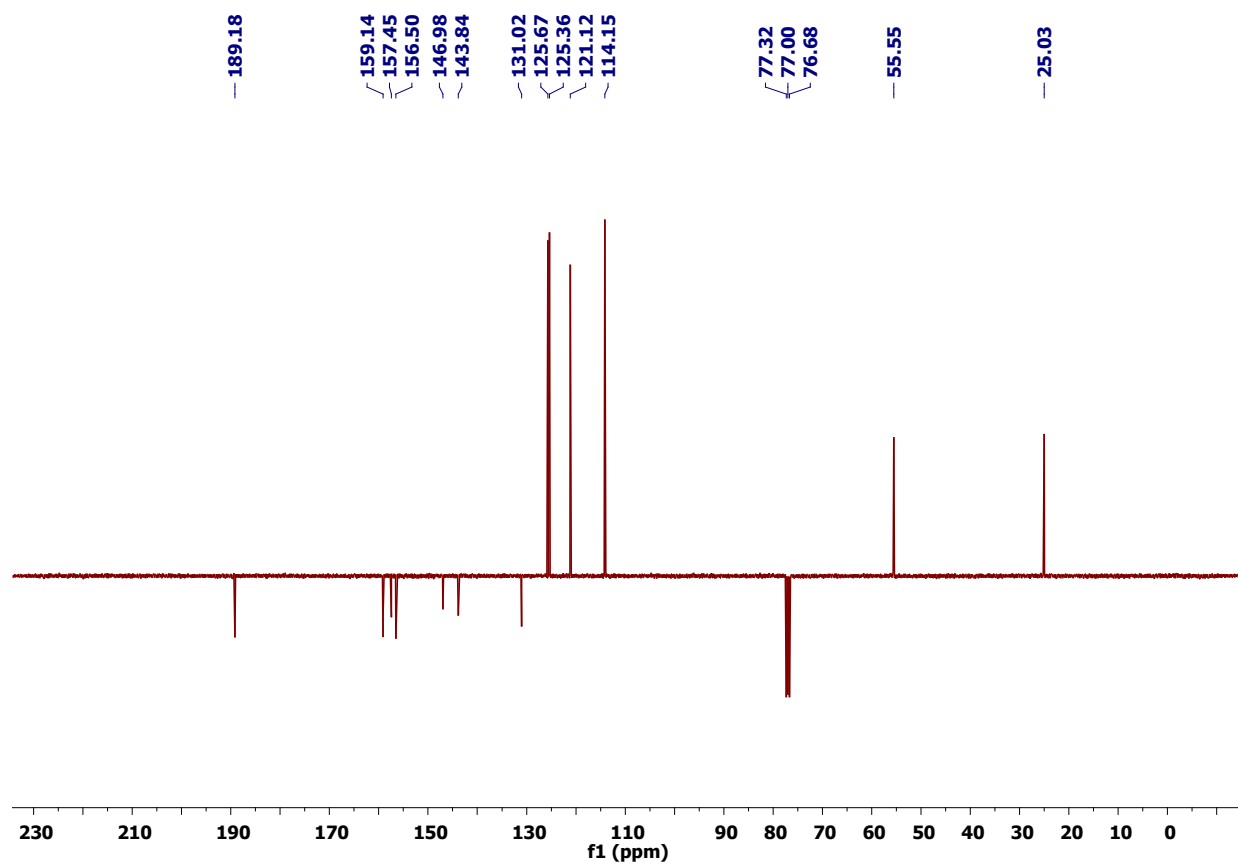

$^1\text{H}$ - $^1\text{H}$  gDQCOSY NMR ( $\text{CDCl}_3$ ) spectrum of (Z)-1-(4-(4-methoxyphenyl)-5-((4-nitrophenyl)imino)-4,5-dihydro-1,3,4-thiadiazol-2-yl)ethan-1-one

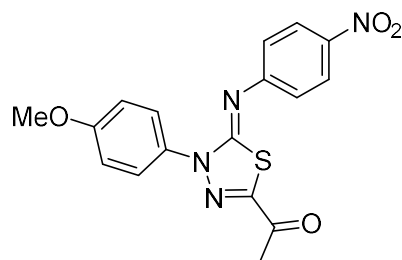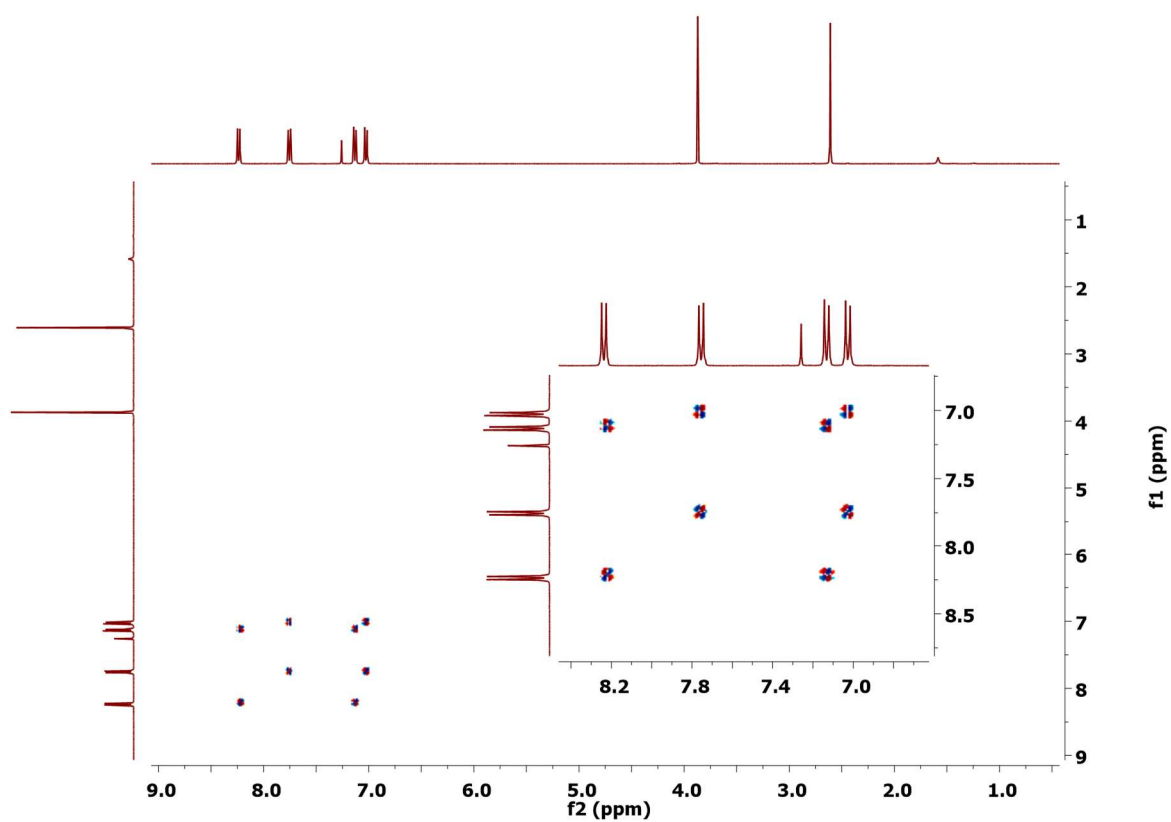

$^1\text{H}$ - $^{13}\text{C}$ -HSQC NMR ( $\text{CDCl}_3$ ) spectrum of (Z)-1-(4-(4-methoxyphenyl)-5-((4-nitrophenyl)imino)-4,5-dihydro-1,3,4-thiadiazol-2-yl)ethan-1-one

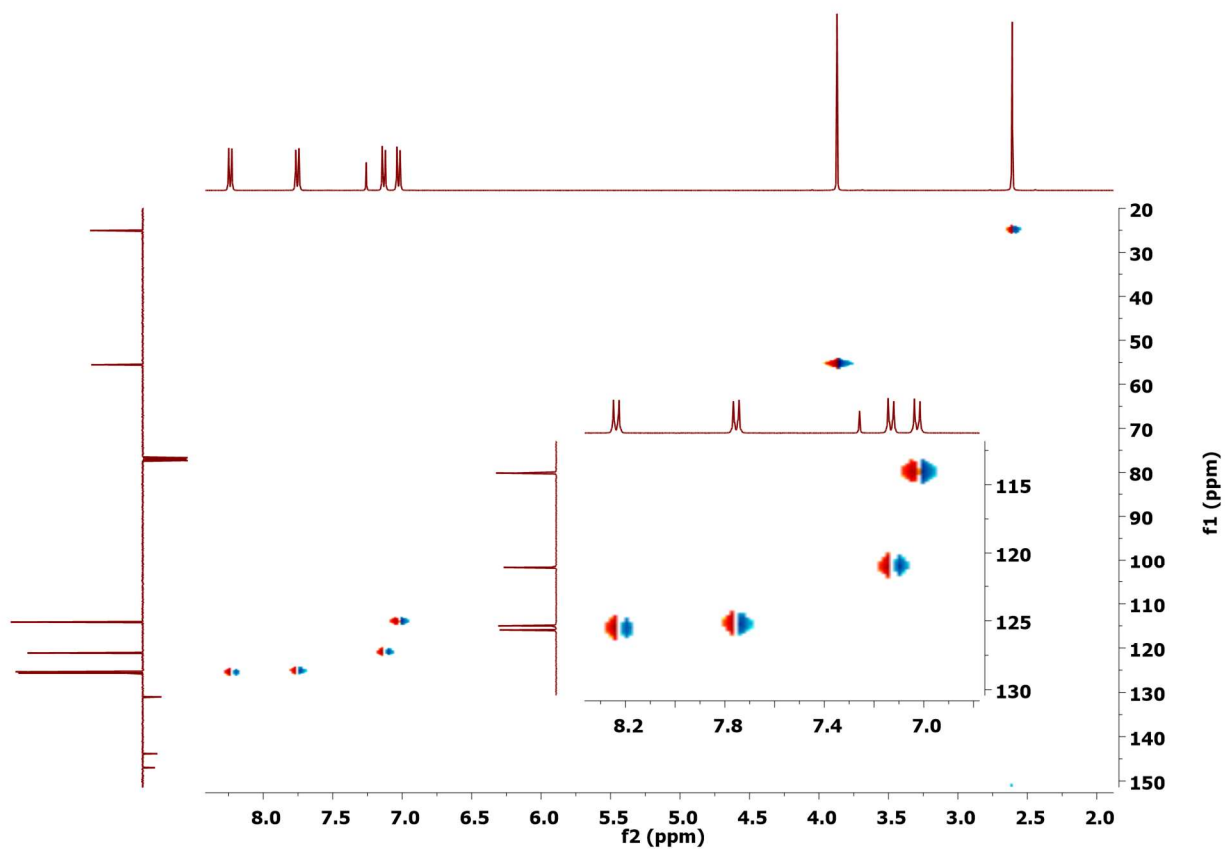



$^1\text{H}$ - $^{13}\text{C}$ -gHMBC NMR ( $\text{CDCl}_3$ ) spectrum of (Z)-1-(4-(4-methoxyphenyl)-5-((4-nitrophenyl)imino)-4,5-dihydro-1,3,4-thiadiazol-2-yl)ethan-1-one

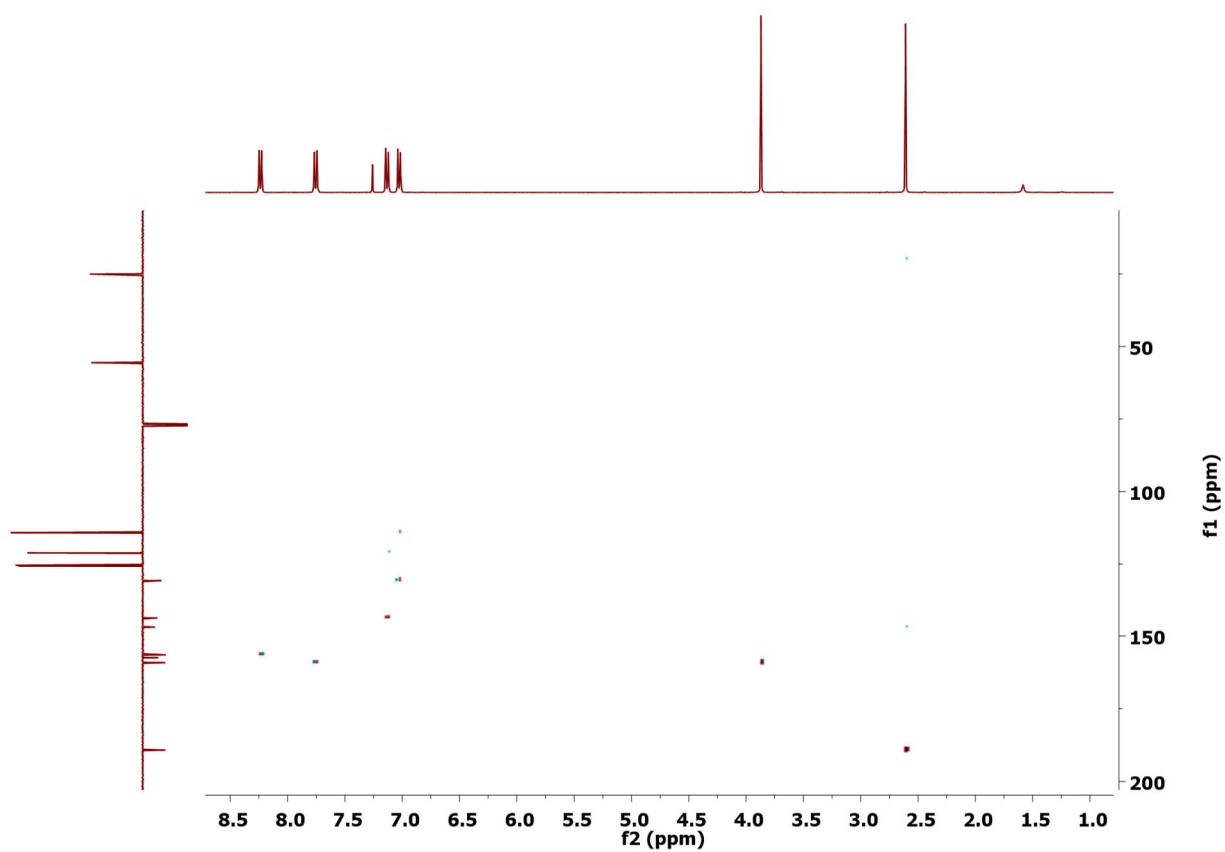

$^1\text{H}$  NMR ( $\text{CDCl}_3$ ) spectrum of (Z)-1-(5-((4-nitrophenyl)imino)-4-(m-tolyl)-4,5-dihydro-1,3,4-thiadiazol-2-yl)ethan-1-one

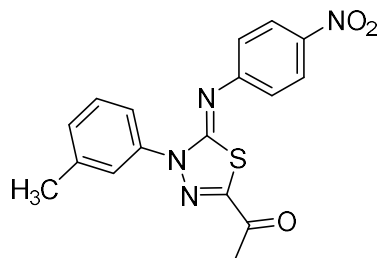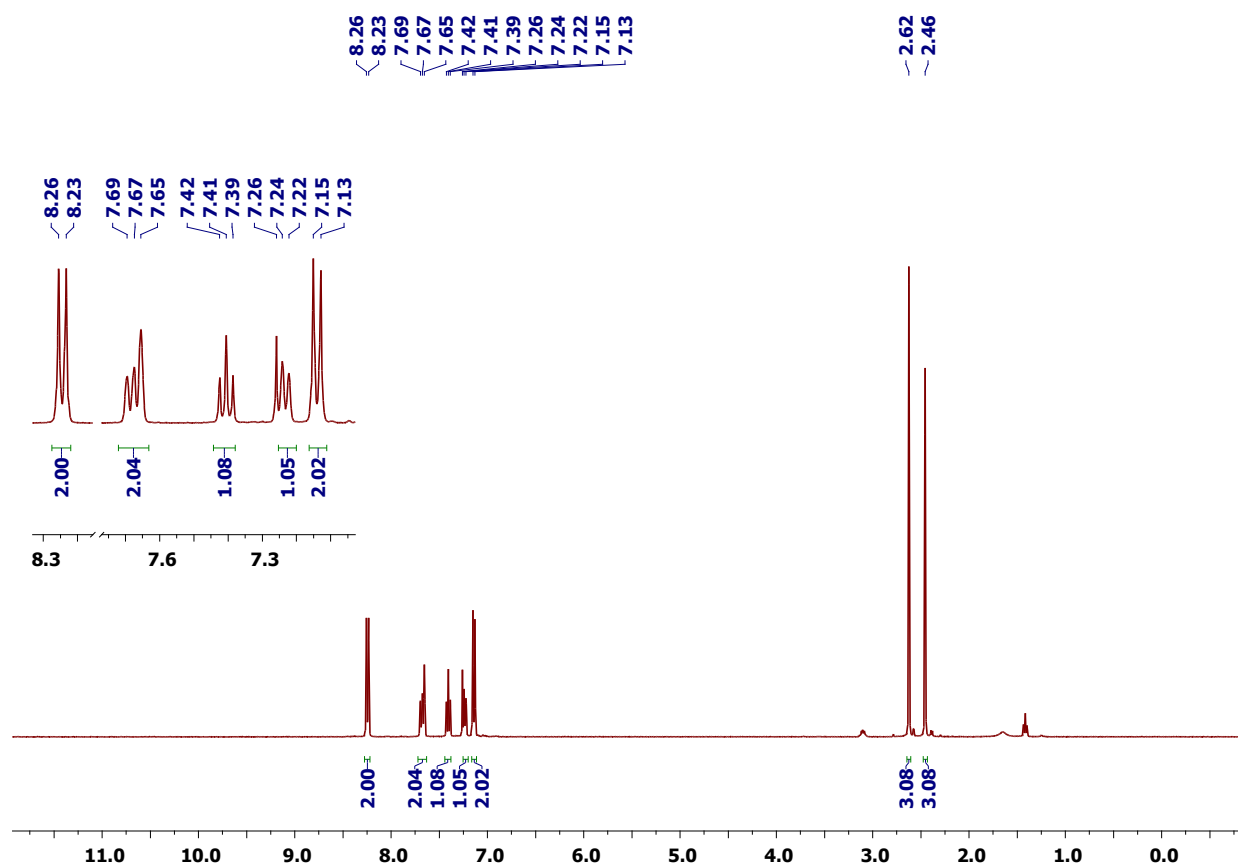

$^{13}\text{C}$  NMR ( $\text{CDCl}_3$ ) spectrum of (Z)-1-((4-nitrophenyl)imino)-4-(m-tolyl)-4,5-dihydro-1,3,4-thiadiazol-2-yl)ethan-1-one

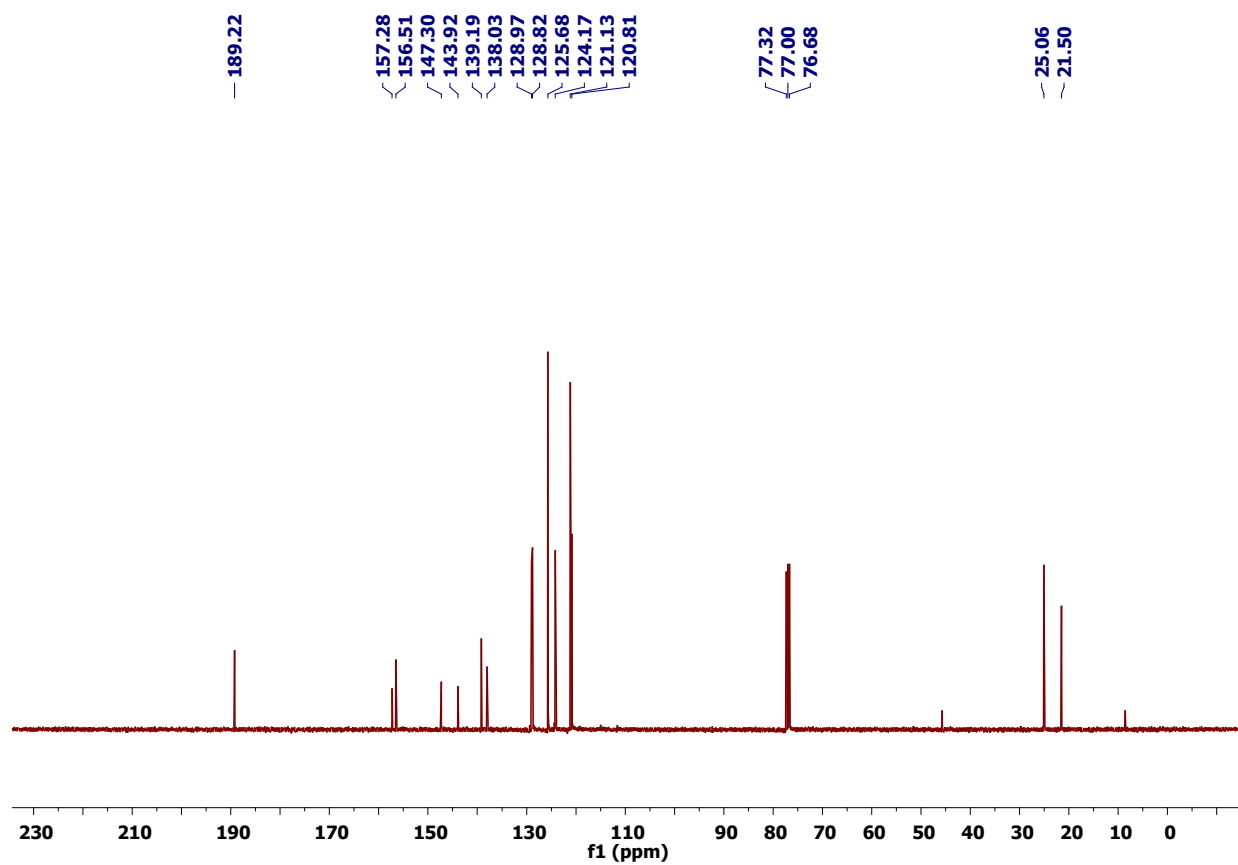

$^{13}\text{C}$  CRAPT NMR ( $\text{CDCl}_3$ ) spectrum of (Z)-1-(5-((4-nitrophenyl)imino)-4-(m-tolyl)-4,5-dihydro-1,3,4-thiadiazol-2-yl)ethan-1-one

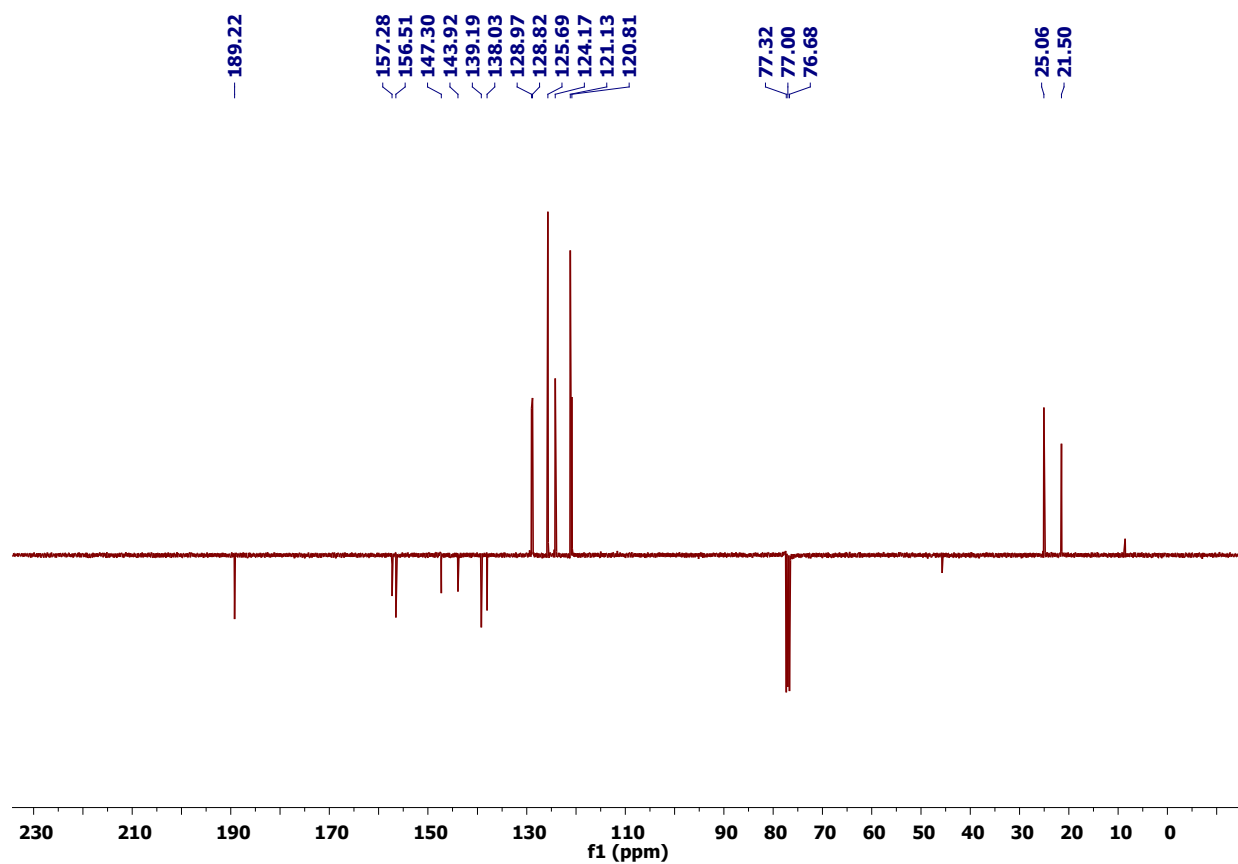

$^1\text{H}$ - $^1\text{H}$  gDQCOSY NMR ( $\text{CDCl}_3$ ) spectrum of (Z)-1-(5-((4-nitrophenyl)imino)-4-(m-tolyl)-4,5-dihydro-1,3,4-thiadiazol-2-yl)ethan-1-one

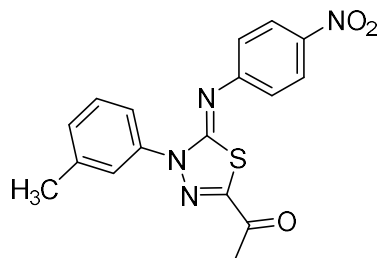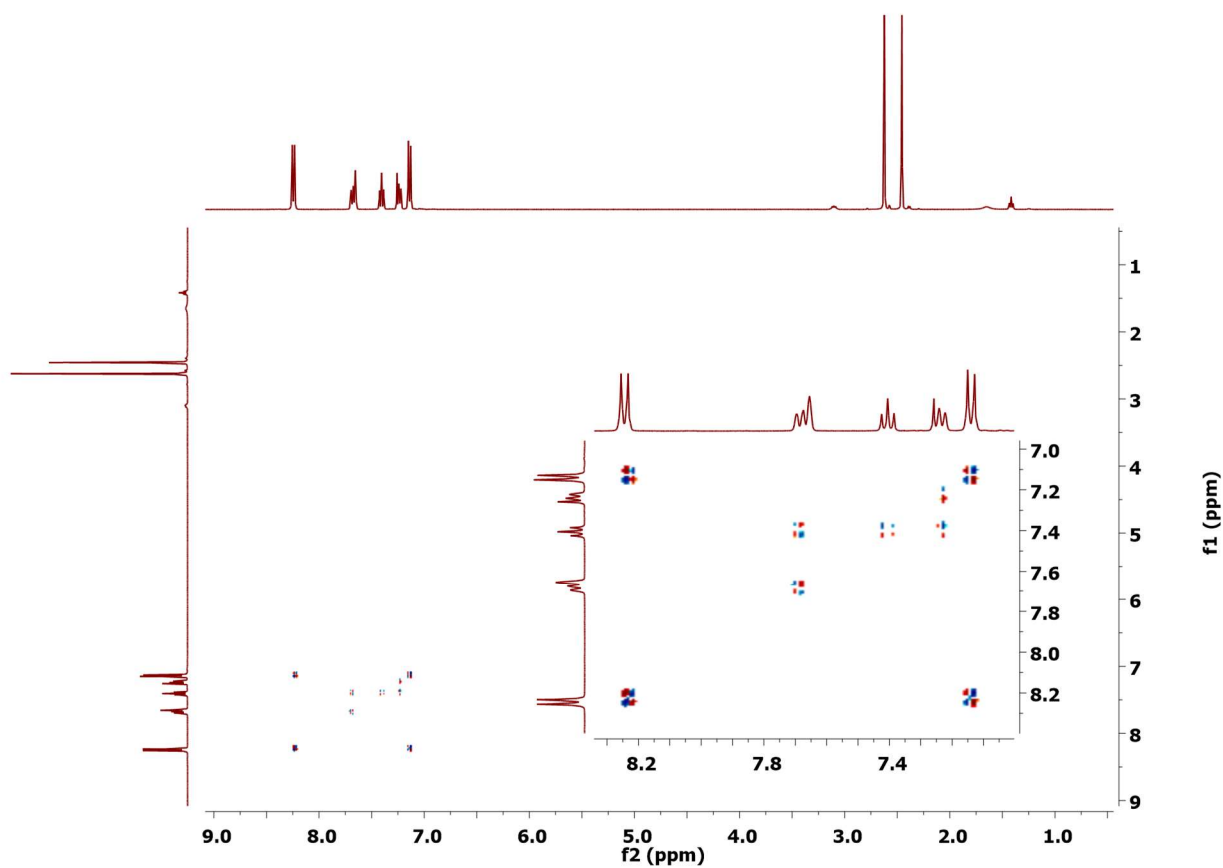

$^1\text{H}$ - $^{13}\text{C}$ -HSQC NMR ( $\text{CDCl}_3$ ) spectrum of (Z)-1-(5-((4-nitrophenyl)imino)-4-(m-tolyl)-4,5-dihydro-1,3,4-thiadiazol-2-yl)ethan-1-one

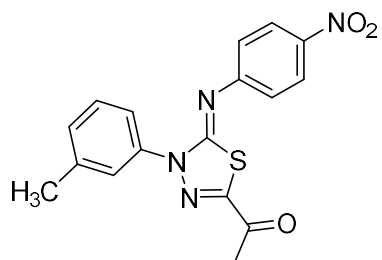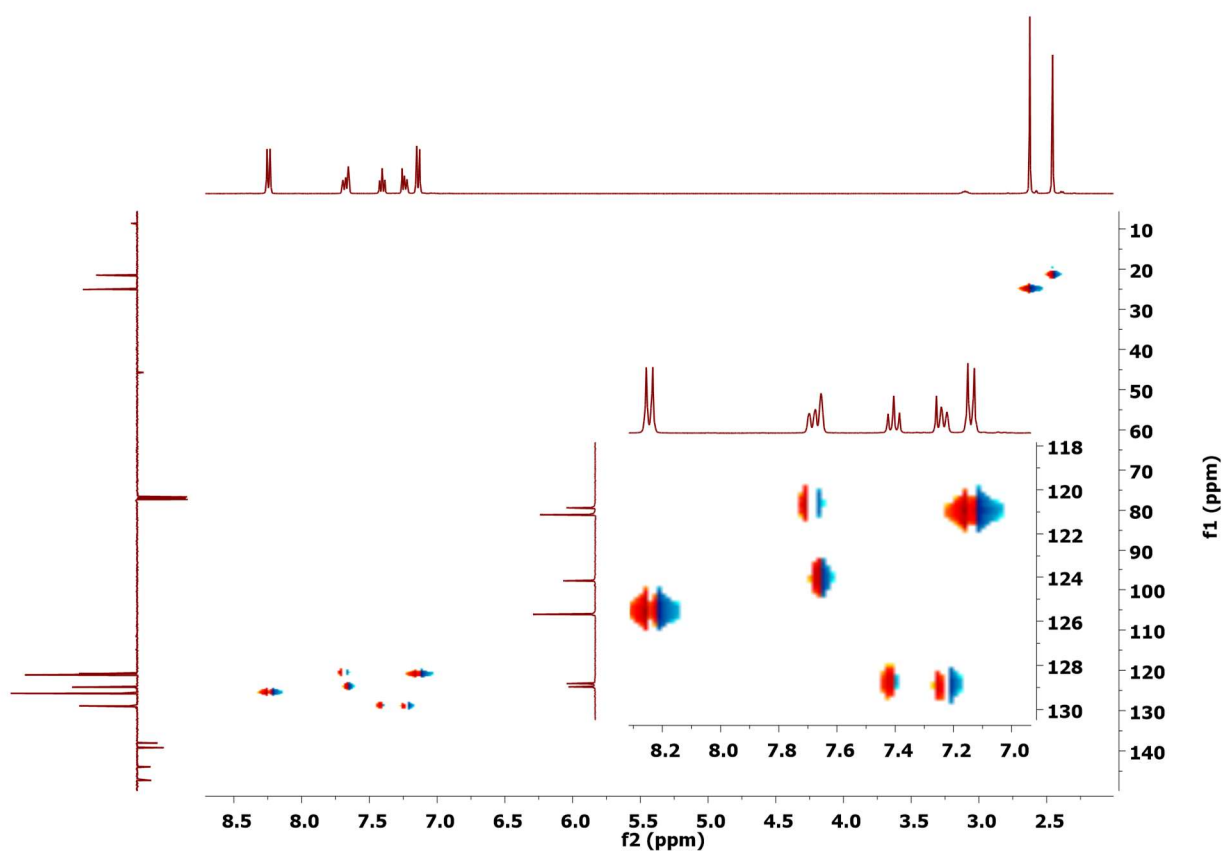

$^1\text{H}$ - $^{13}\text{C}$ -gHMBC NMR ( $\text{CDCl}_3$ ) spectrum of (Z)-1-(5-((4-nitrophenyl)imino)-4-(m-tolyl)-4,5-dihydro-1,3,4-thiadiazol-2-yl)ethan-1-one

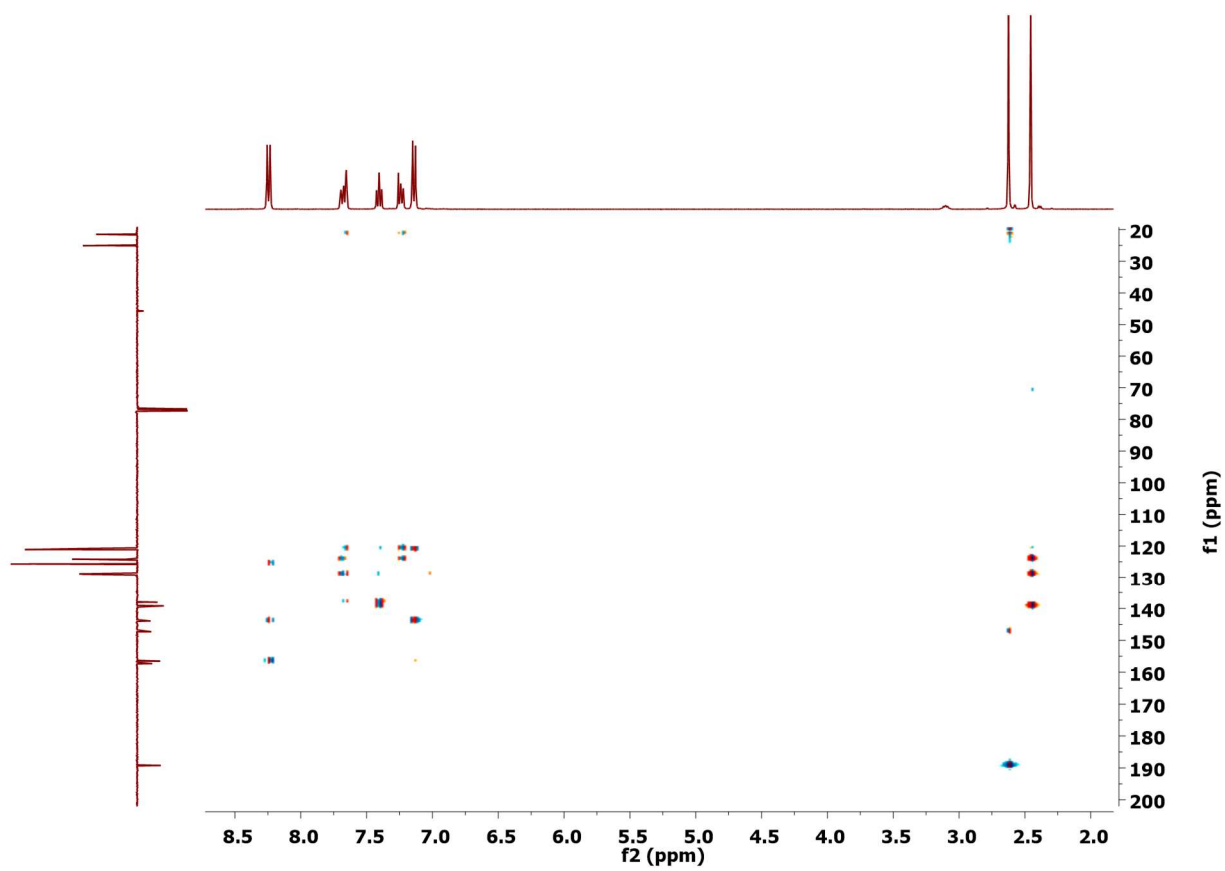

$^1\text{H}$  NMR ( $\text{CDCl}_3$ ) spectrum of (Z)-1-(4-(benzo[d][1,3]dioxol-5-yl)-5-((4-nitrophenyl)imino)-4,5-dihydro-1,3,4-thiadiazol-2-yl)ethan-1-one

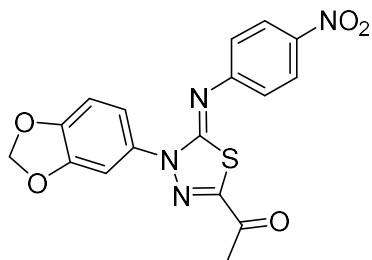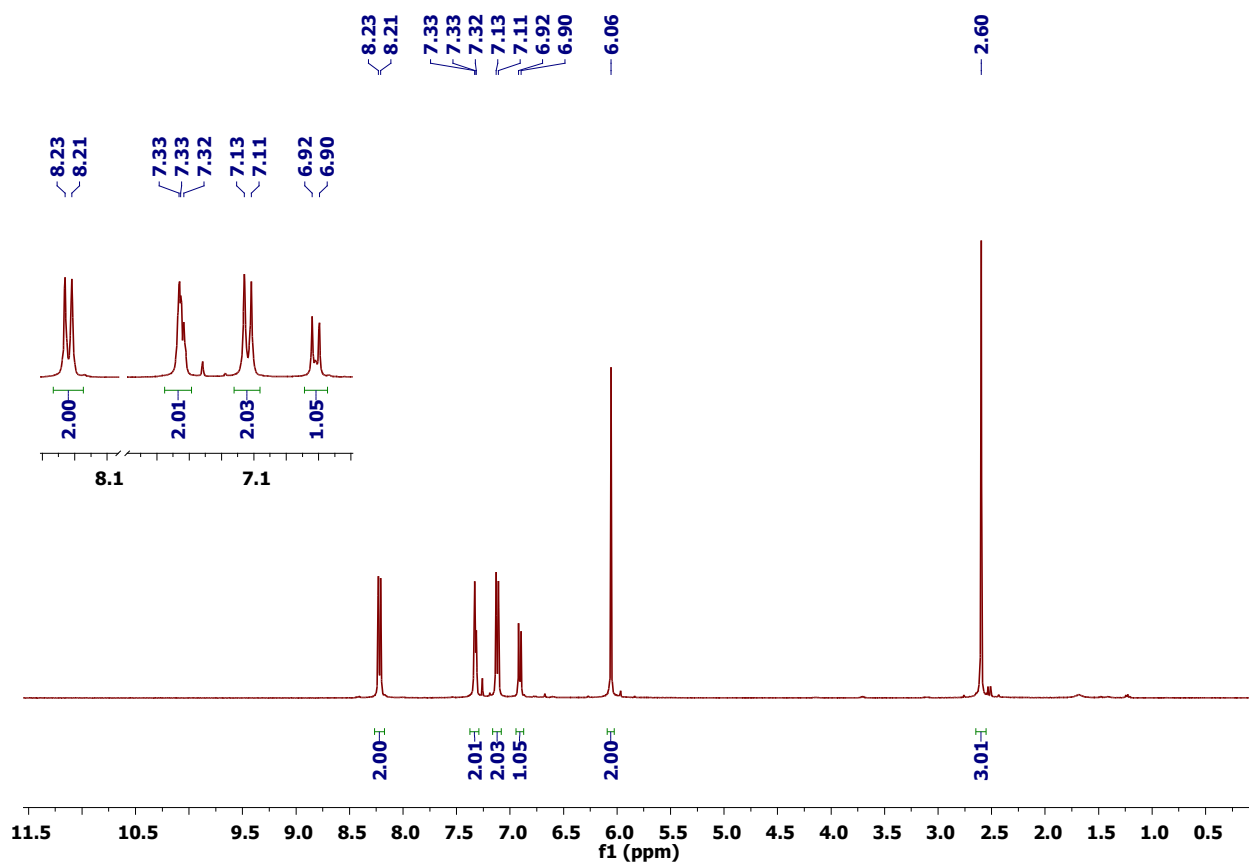



$^{13}\text{C}$  NMR ( $\text{CDCl}_3$ ) spectrum of (Z)-1-(4-(benzo[d][1,3]dioxol-5-yl)-5-((4-nitrophenyl)imino)-4,5-dihydro-1,3,4-thiadiazol-2-yl)ethan-1-one

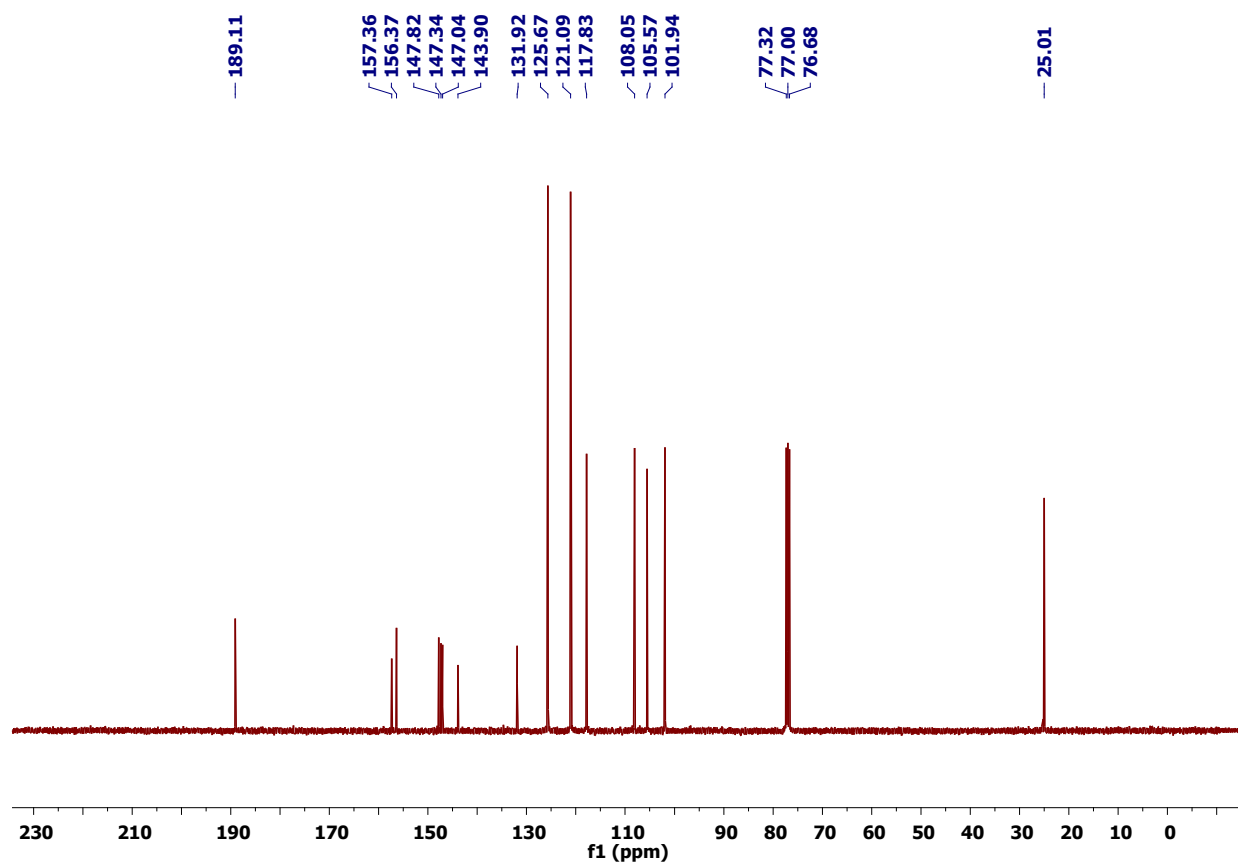

$^{13}\text{C}$  CRAPT NMR ( $\text{CDCl}_3$ ) spectrum of (Z)-1-(4-(benzo[d][1,3]dioxol-5-yl)-5-((4-nitrophenyl)imino)-4,5-dihydro-1,3,4-thiadiazol-2-yl)ethan-1-one

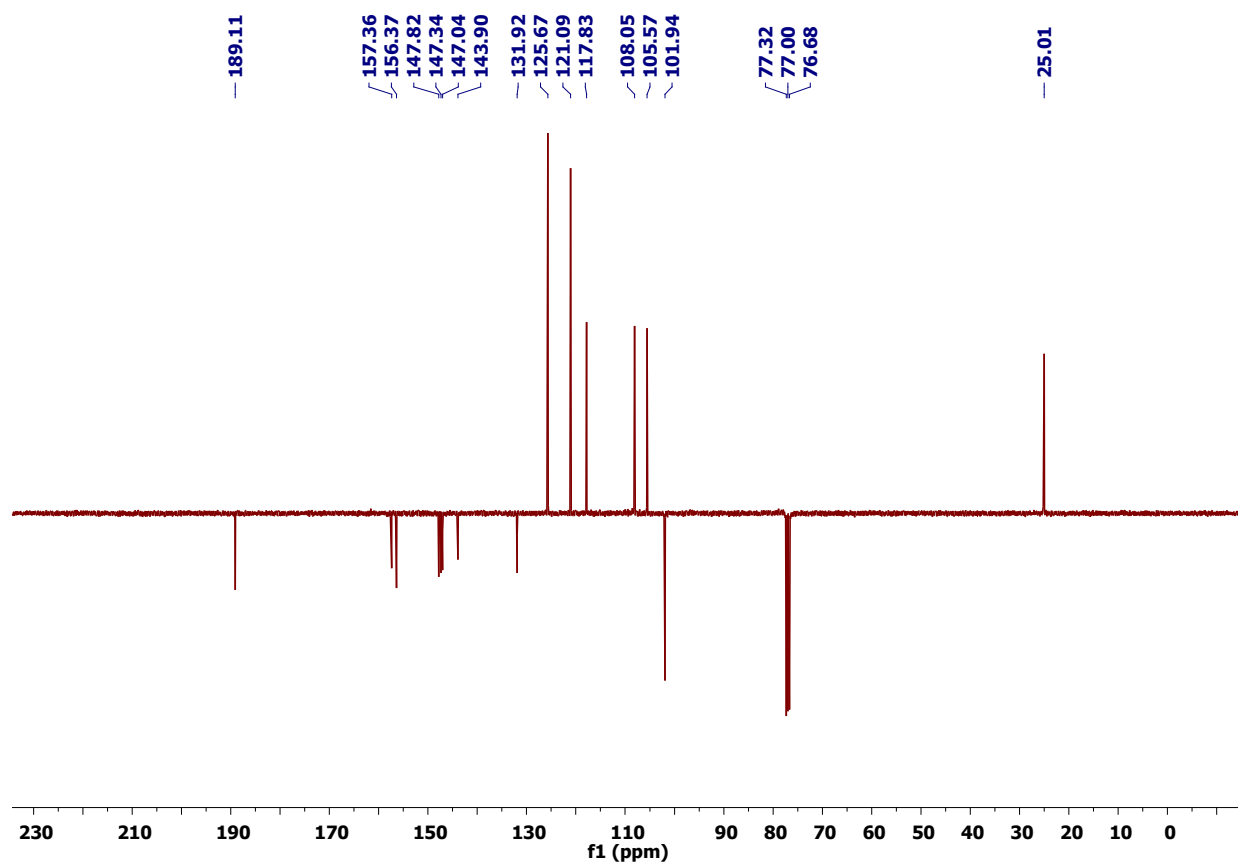

$^1\text{H}$ - $^1\text{H}$  gDQCOSY NMR ( $\text{CDCl}_3$ ) spectrum of (Z)-1-(4-(benzo[d][1,3]dioxol-5-yl)-5-((4-nitrophenyl)imino)-4,5-dihydro-1,3,4-thiadiazol-2-yl)ethan-1-one

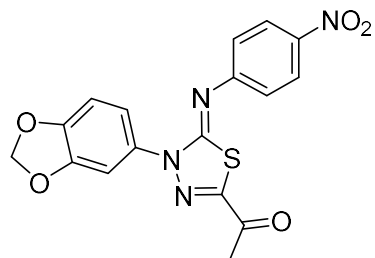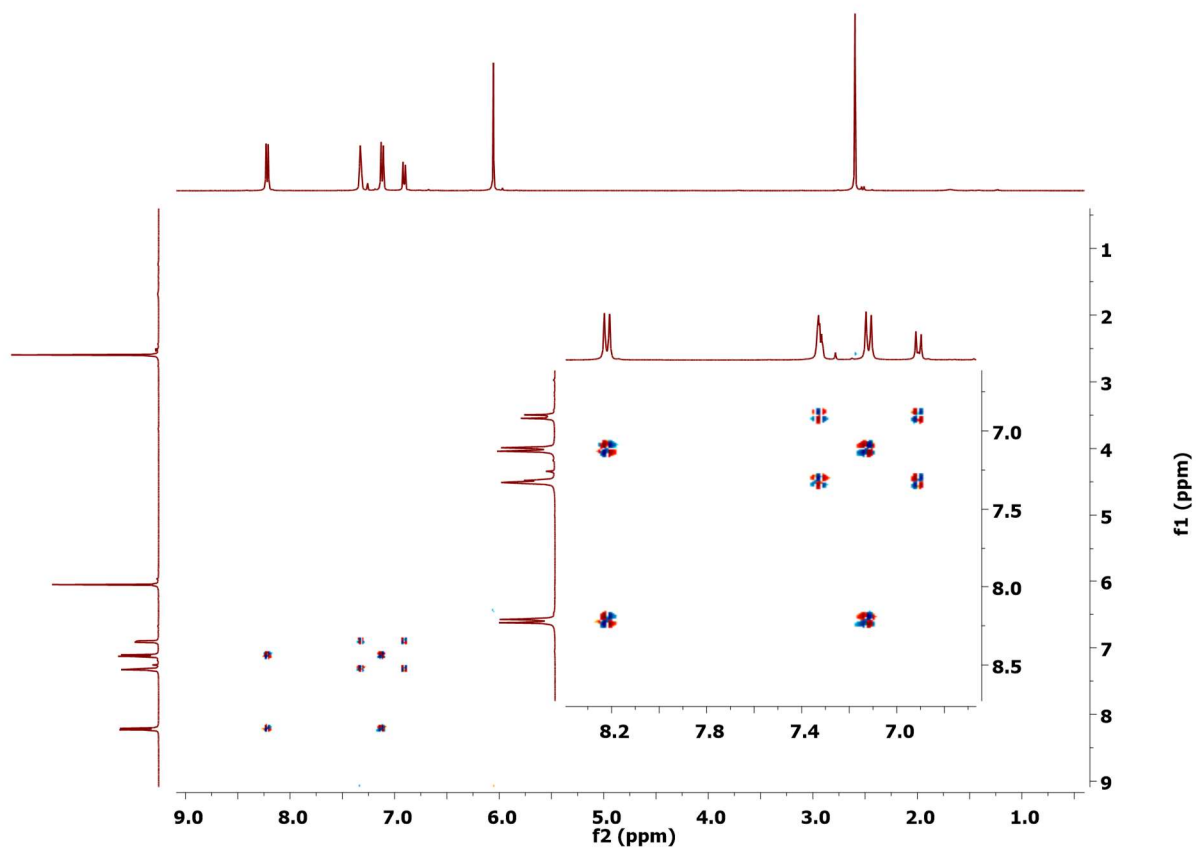

$^1\text{H}$ - $^{13}\text{C}$ -HSQC NMR ( $\text{CDCl}_3$ ) spectrum of (Z)-1-(4-(benzo[d][1,3]dioxol-5-yl)-5-((4-nitrophenyl)imino)-4,5-dihydro-1,3,4-thiadiazol-2-yl)ethan-1-one

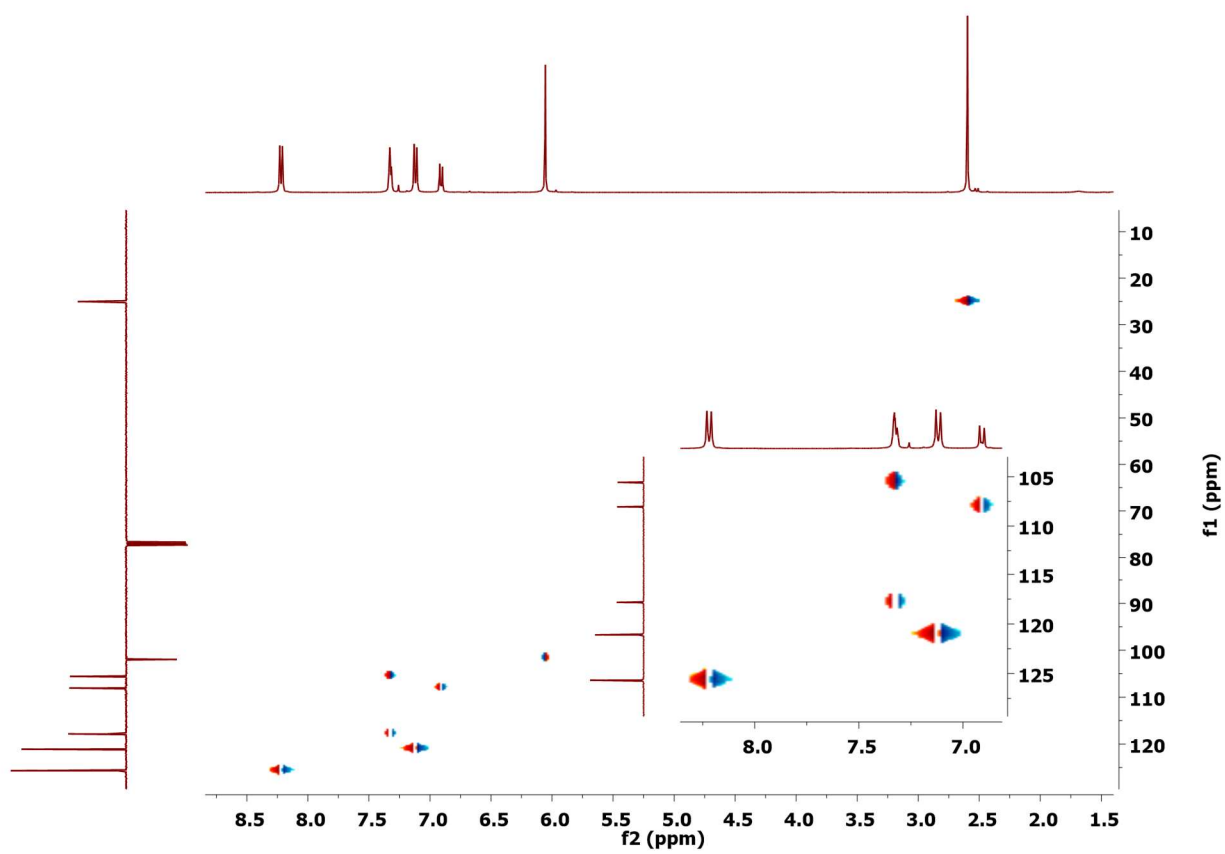

$^1\text{H}$ - $^{13}\text{C}$ -gHMBC NMR ( $\text{CDCl}_3$ ) spectrum of (Z)-1-(4-(benzo[d][1,3]dioxol-5-yl)-5-((4-nitrophenyl)imino)-4,5-dihydro-1,3,4-thiadiazol-2-yl)ethan-1-one

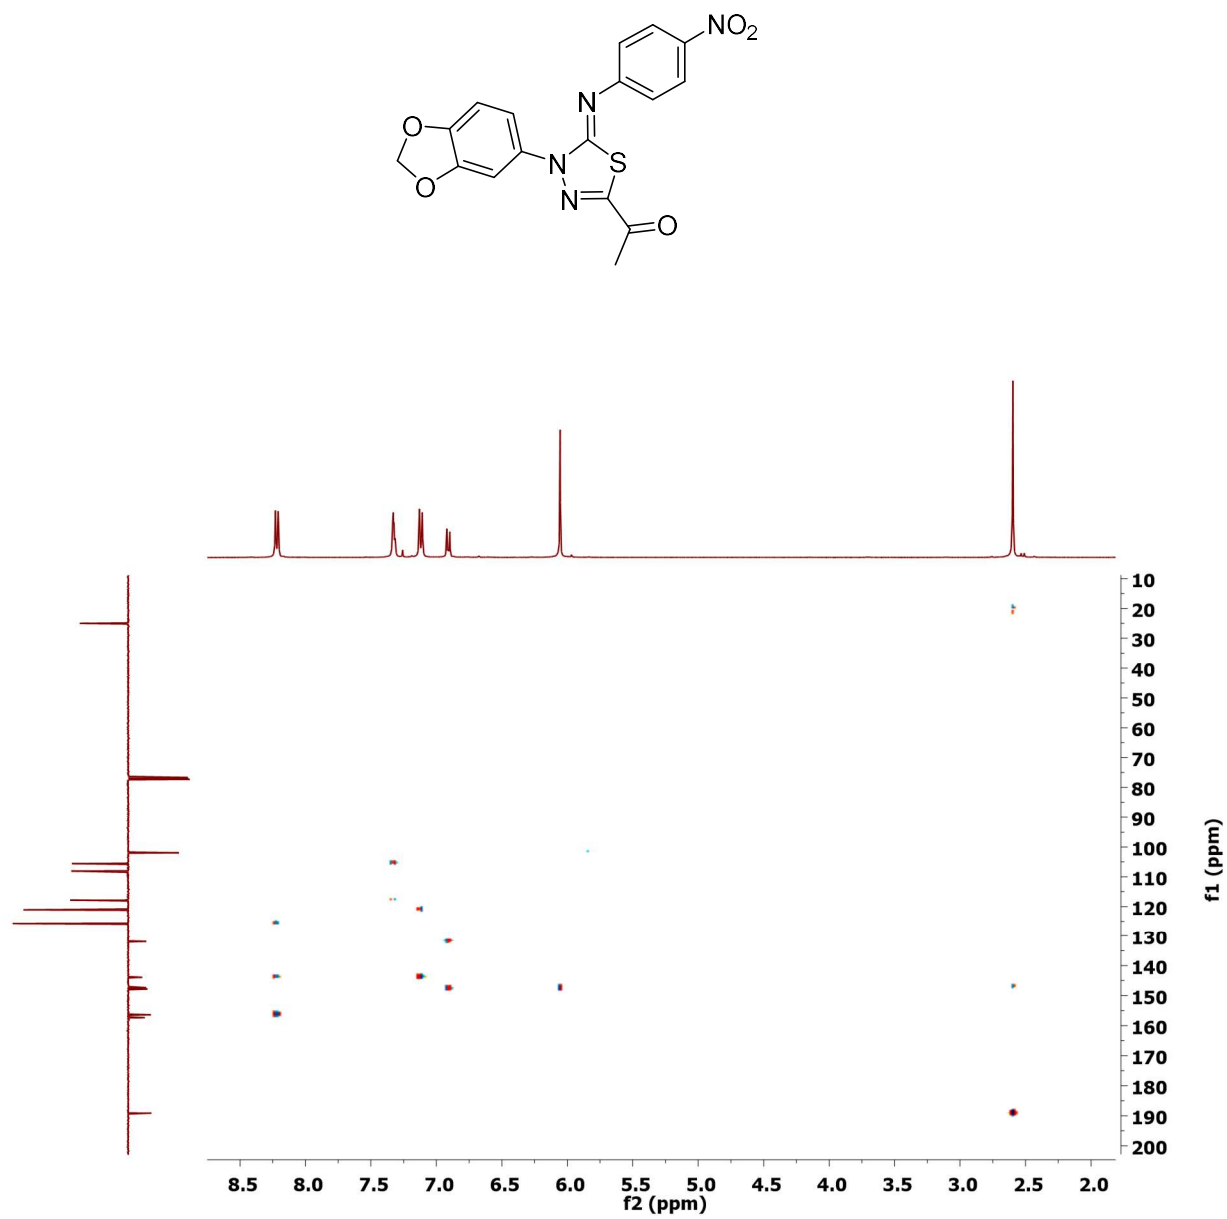

$^1\text{H}$  NMR ( $\text{CDCl}_3$ ) spectrum of (Z)-1-(5-((4-nitrophenyl)imino)-4-(4-(trifluoromethyl)phenyl)-4,5-dihydro-1,3,4-thiadiazol-2-yl)ethan-1-one

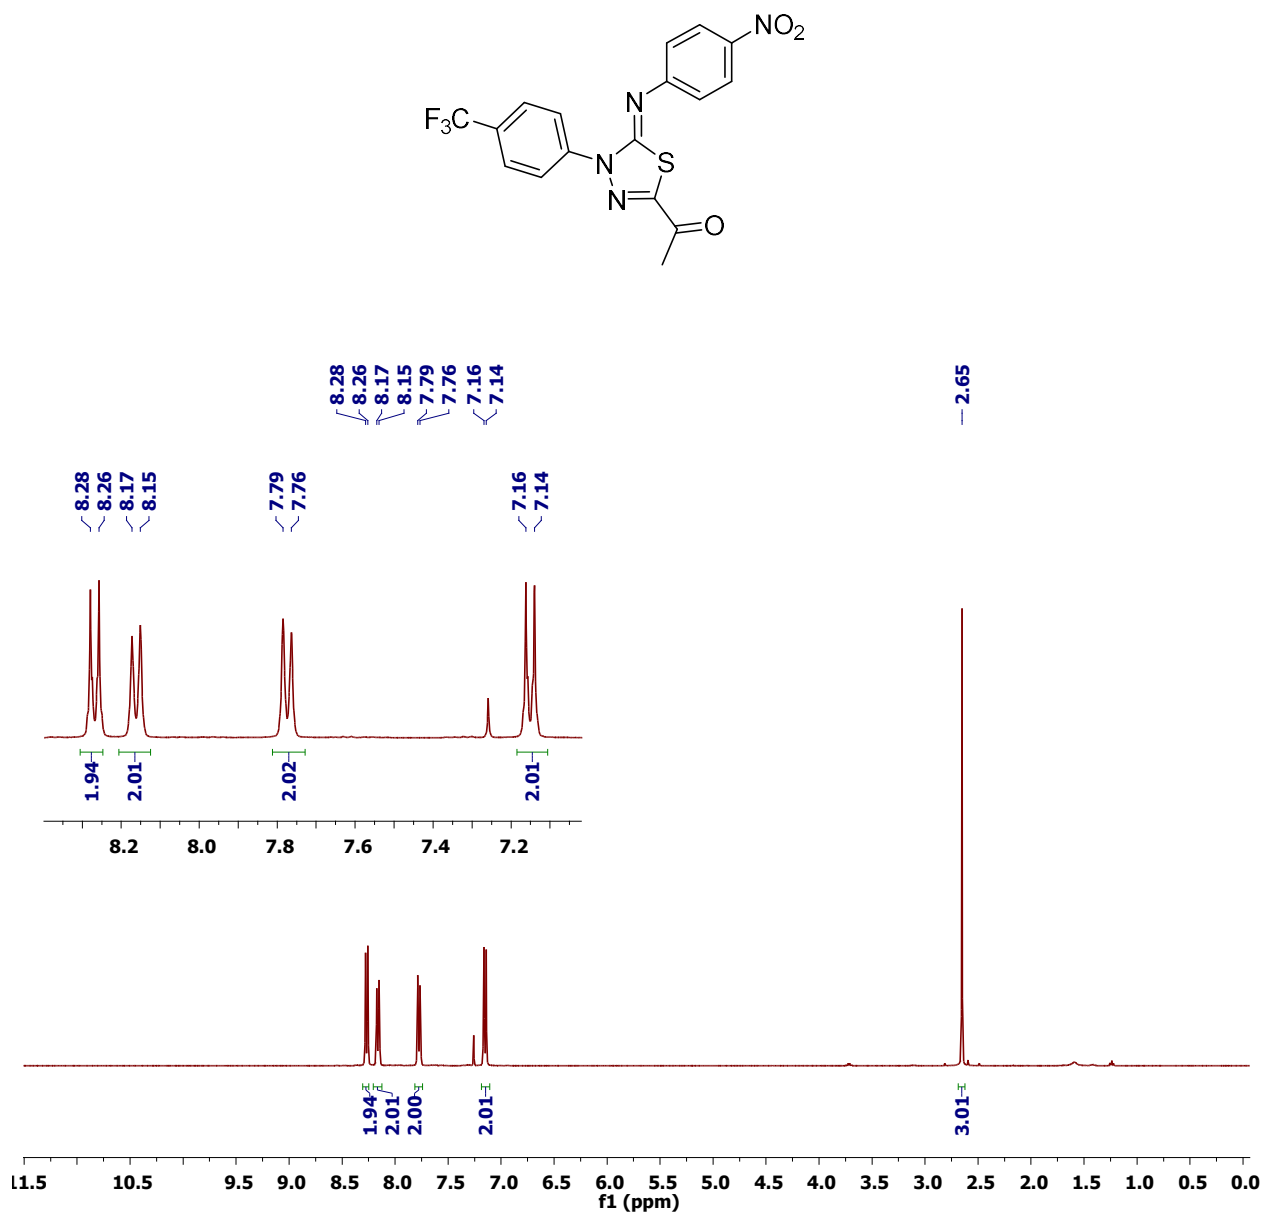

$^{13}\text{C}$  NMR ( $\text{CDCl}_3$ ) spectrum of (Z)-1-(5-((4-nitrophenyl)imino)-4-(4-(trifluoromethyl)phenyl)-4,5-dihydro-1,3,4-thiadiazol-2-yl)ethan-1-one

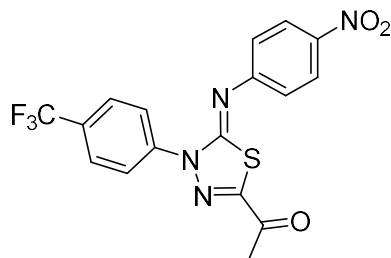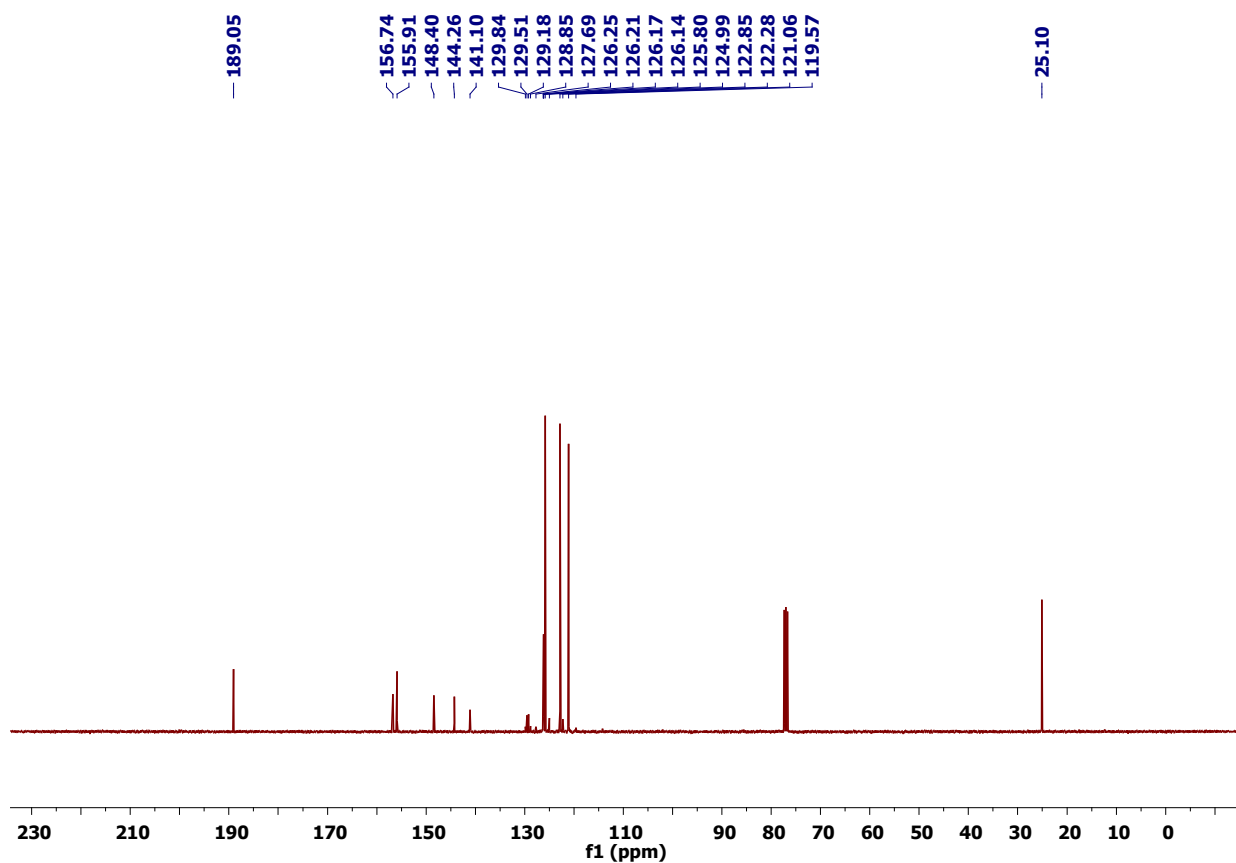

$^{13}\text{C}$  CRAPT NMR ( $\text{CDCl}_3$ ) spectrum of (Z)-1-(5-((4-nitrophenyl)imino)-4-(4-(trifluoromethyl)phenyl)-4,5-dihydro-1,3,4-thiadiazol-2-yl)ethan-1-one

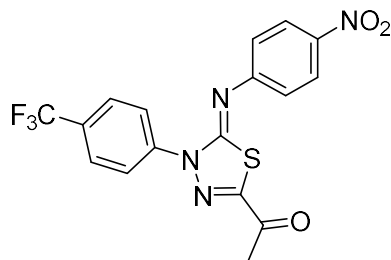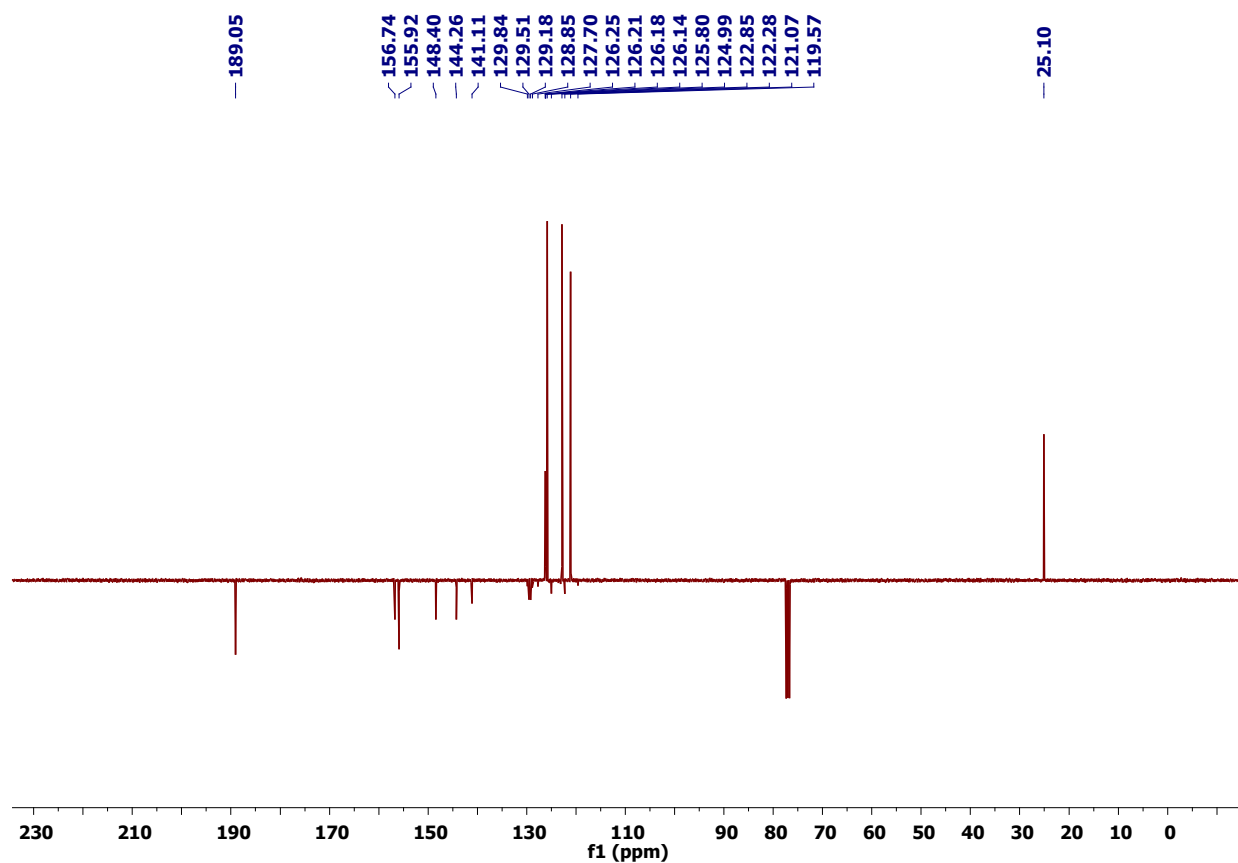



$^1\text{H}$ - $^1\text{H}$  gDQCOSY NMR ( $\text{CDCl}_3$ ) spectrum of (Z)-1-(5-((4-nitrophenyl)imino)-4-(4-(trifluoromethyl)phenyl)-4,5-dihydro-1,3,4-thiadiazol-2-yl)ethan-1-one

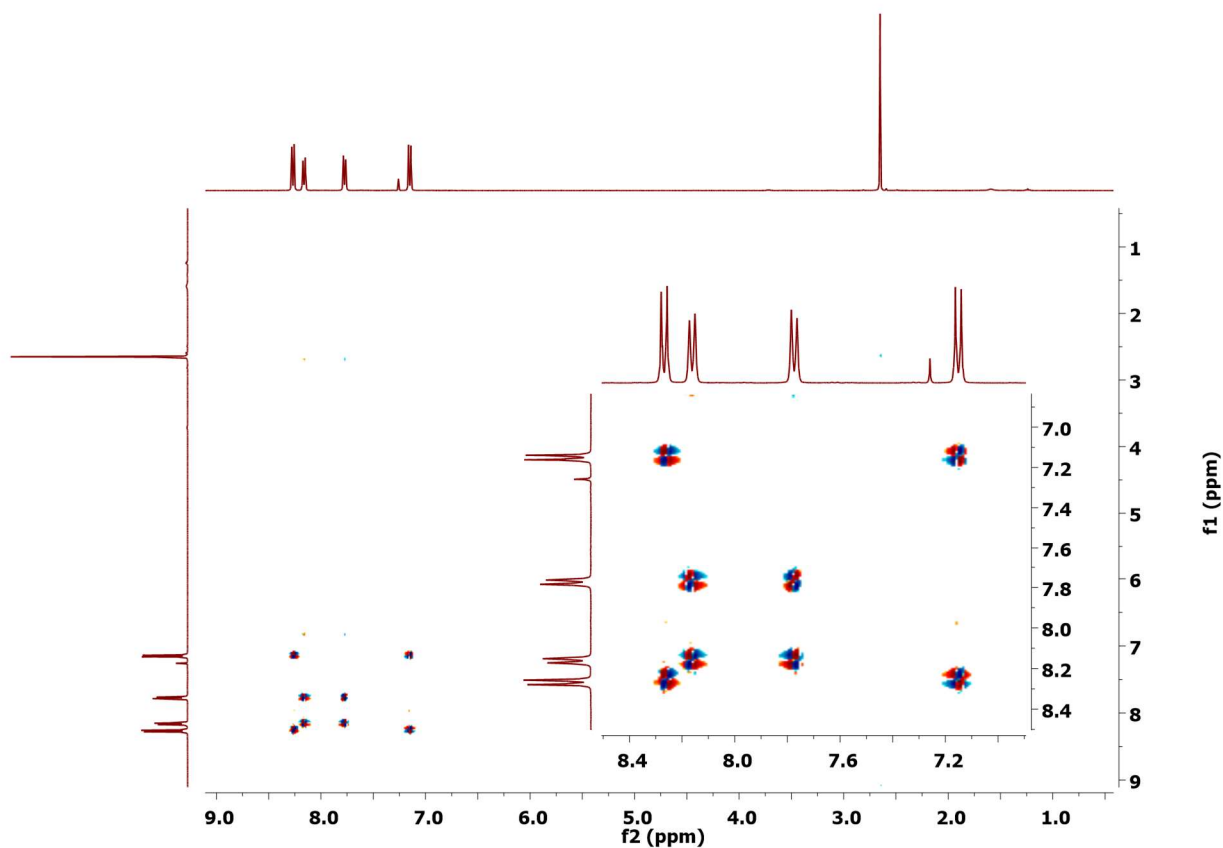

$^1\text{H}$ - $^{13}\text{C}$ -HSQC NMR ( $\text{CDCl}_3$ ) spectrum of (Z)-1-(5-((4-nitrophenyl)imino)-4-(4-(trifluoromethyl)phenyl)-4,5-dihydro-1,3,4-thiadiazol-2-yl)ethan-1-one

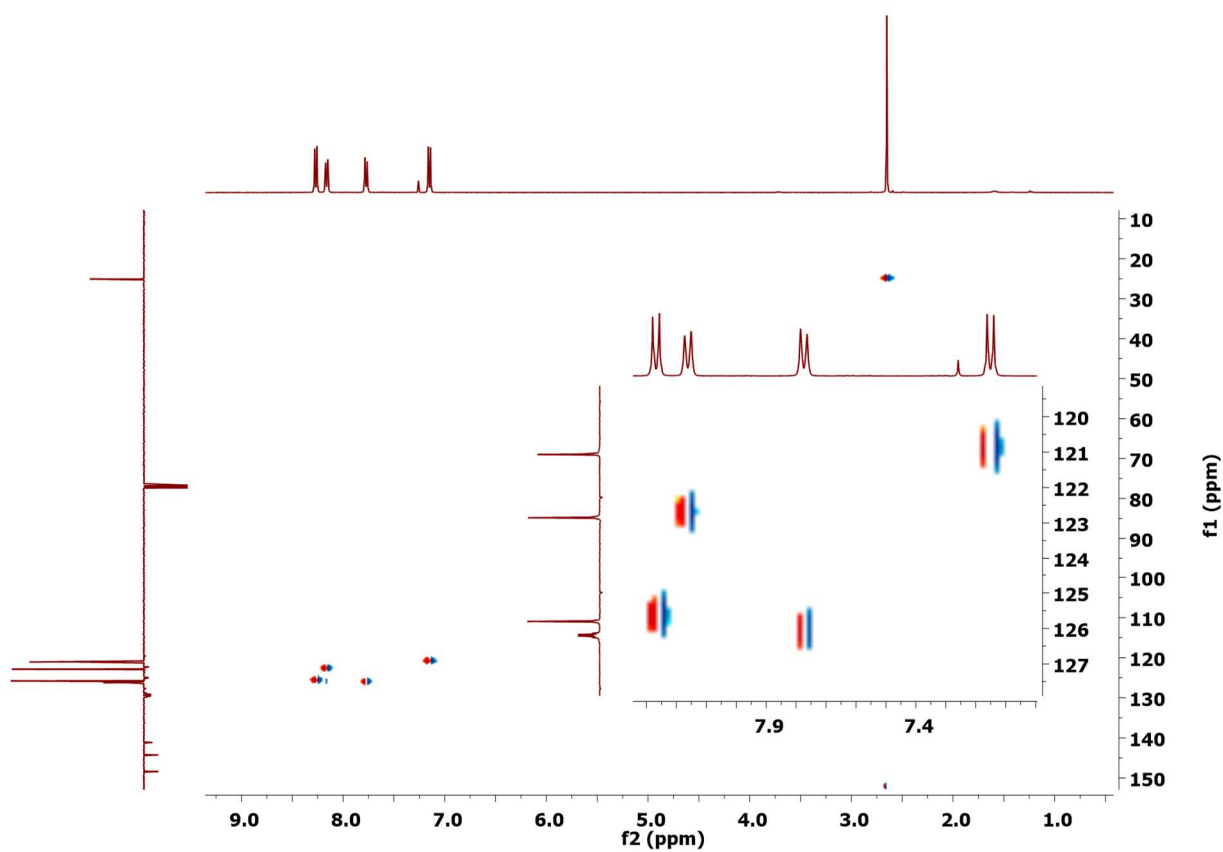

$^1\text{H}$ - $^{13}\text{C}$ -gHMBC NMR ( $\text{CDCl}_3$ ) spectrum of (Z)-1-(5-((4-nitrophenyl)imino)-4-(4-(trifluoromethyl)phenyl)-4,5-dihydro-1,3,4-thiadiazol-2-yl)ethan-1-one

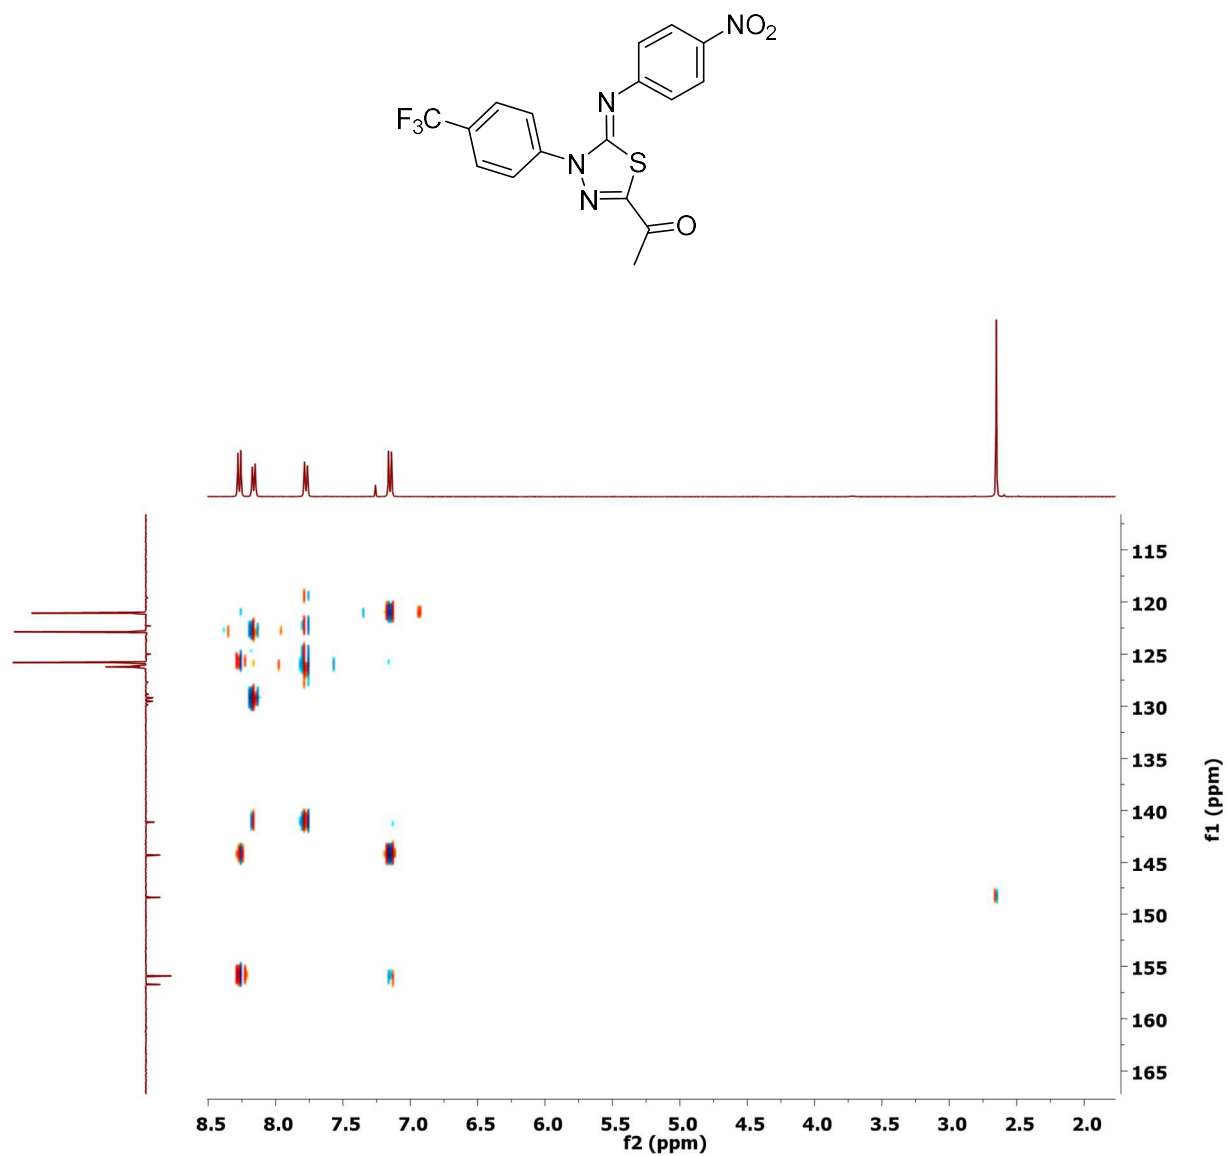

$^1\text{H}$  NMR ( $\text{CDCl}_3$ ) spectrum of (Z)-1-(5-((4-nitrophenyl)imino)-4-(3-(trifluoromethyl)phenyl)-4,5-dihydro-1,3,4-thiadiazol-2-yl)ethan-1-one

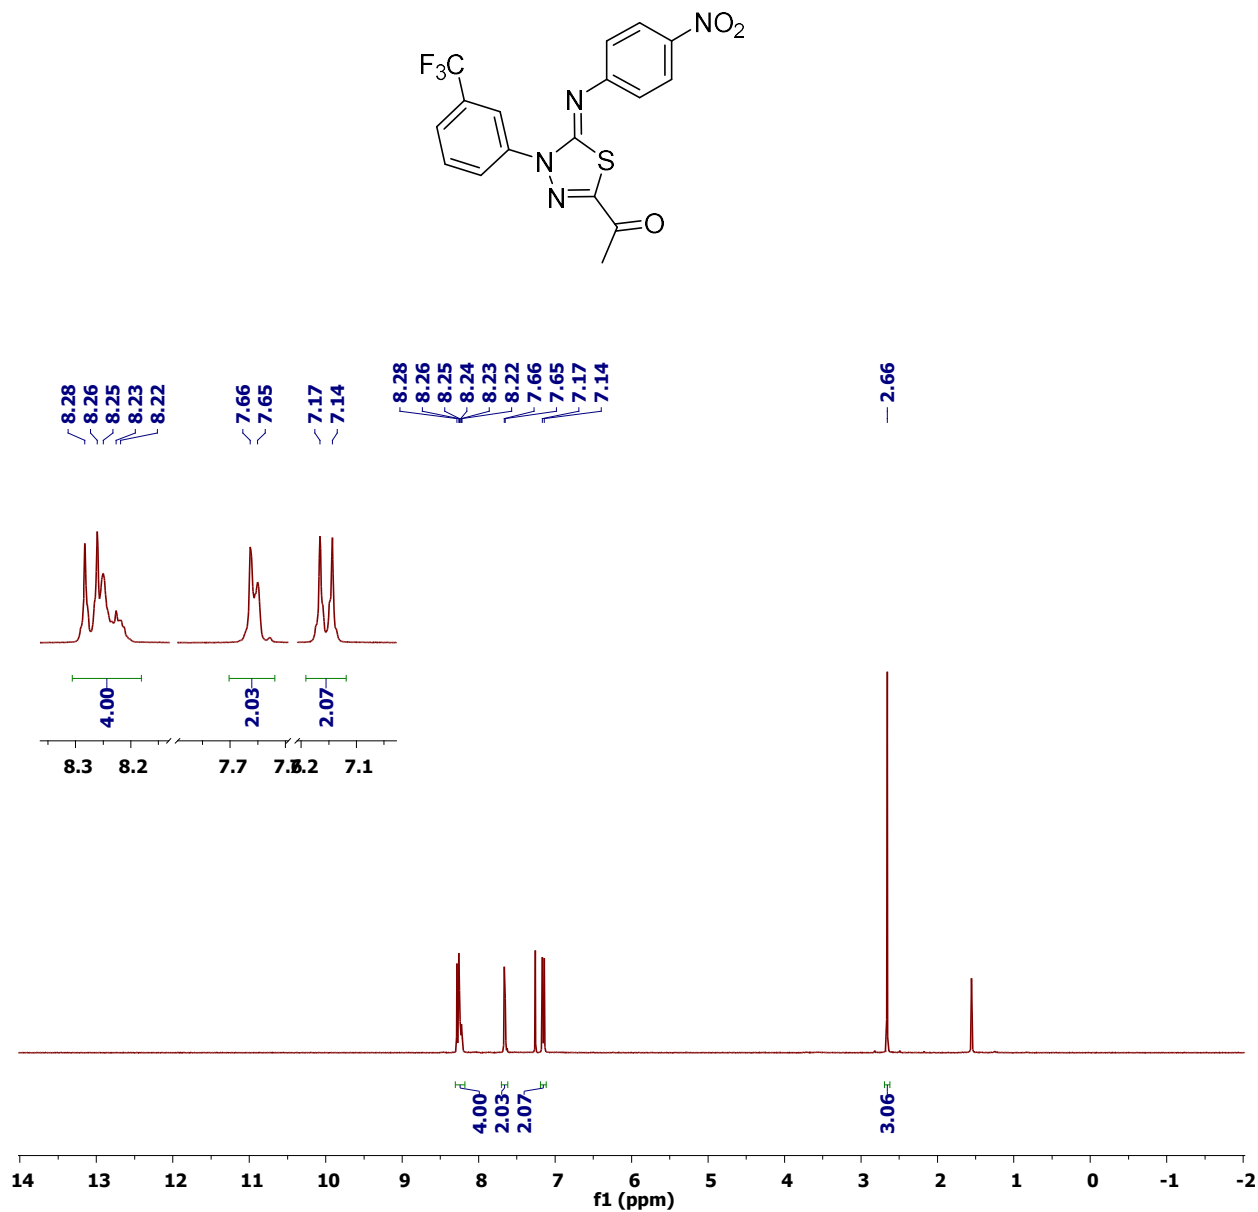

$^{13}\text{C}$  NMR ( $\text{CDCl}_3$ ) spectrum of (Z)-1-(5-((4-nitrophenyl)imino)-4-(3-(trifluoromethyl)phenyl)-4,5-dihydro-1,3,4-thiadiazol-2-yl)ethan-1-one

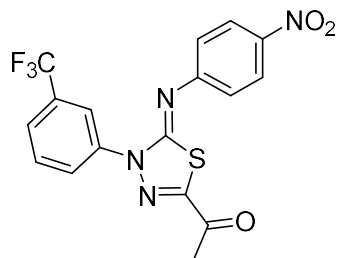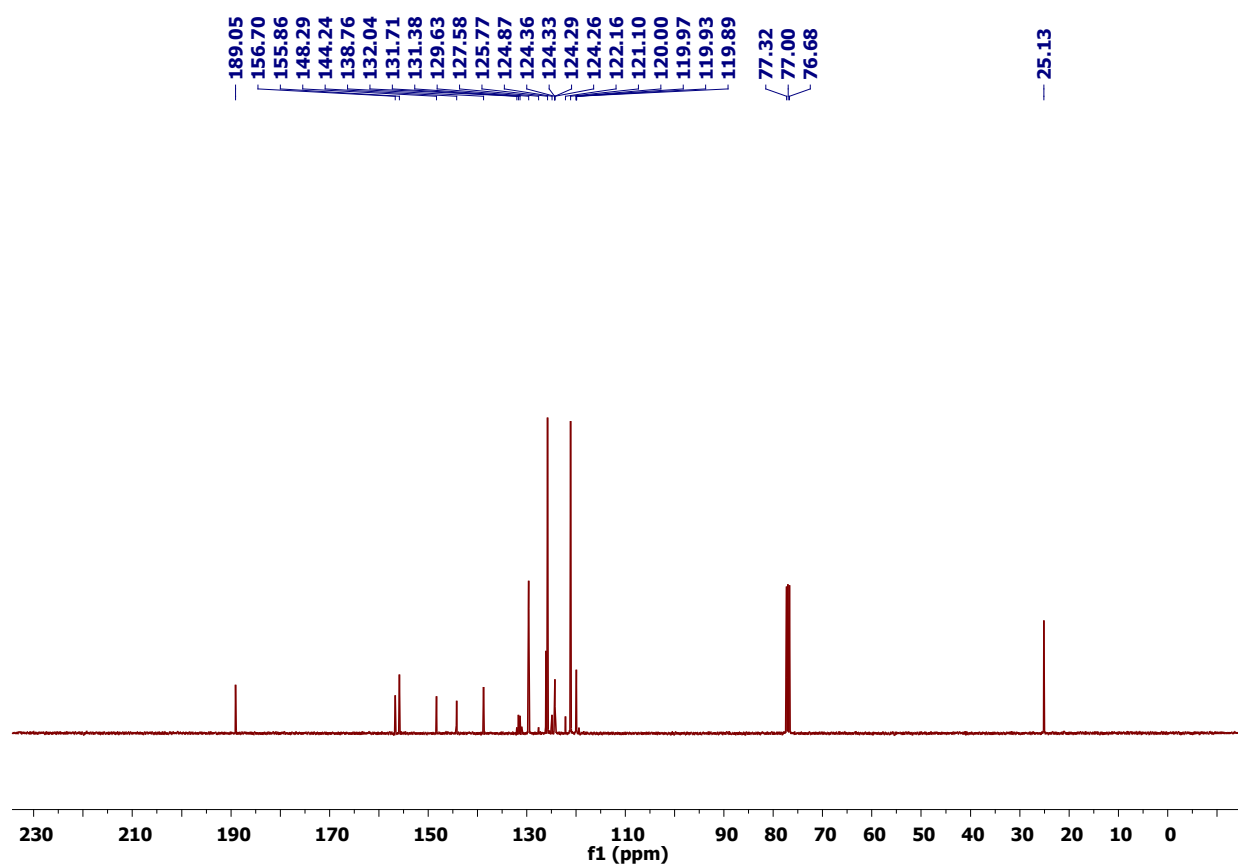

$^{13}\text{C}$  CRAPT NMR ( $\text{CDCl}_3$ ) spectrum of (Z)-1-(5-((4-nitrophenyl)imino)-4-(3-(trifluoromethyl)phenyl)-4,5-dihydro-1,3,4-thiadiazol-2-yl)ethan-1-one

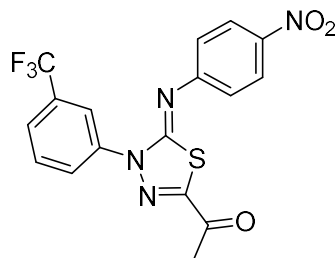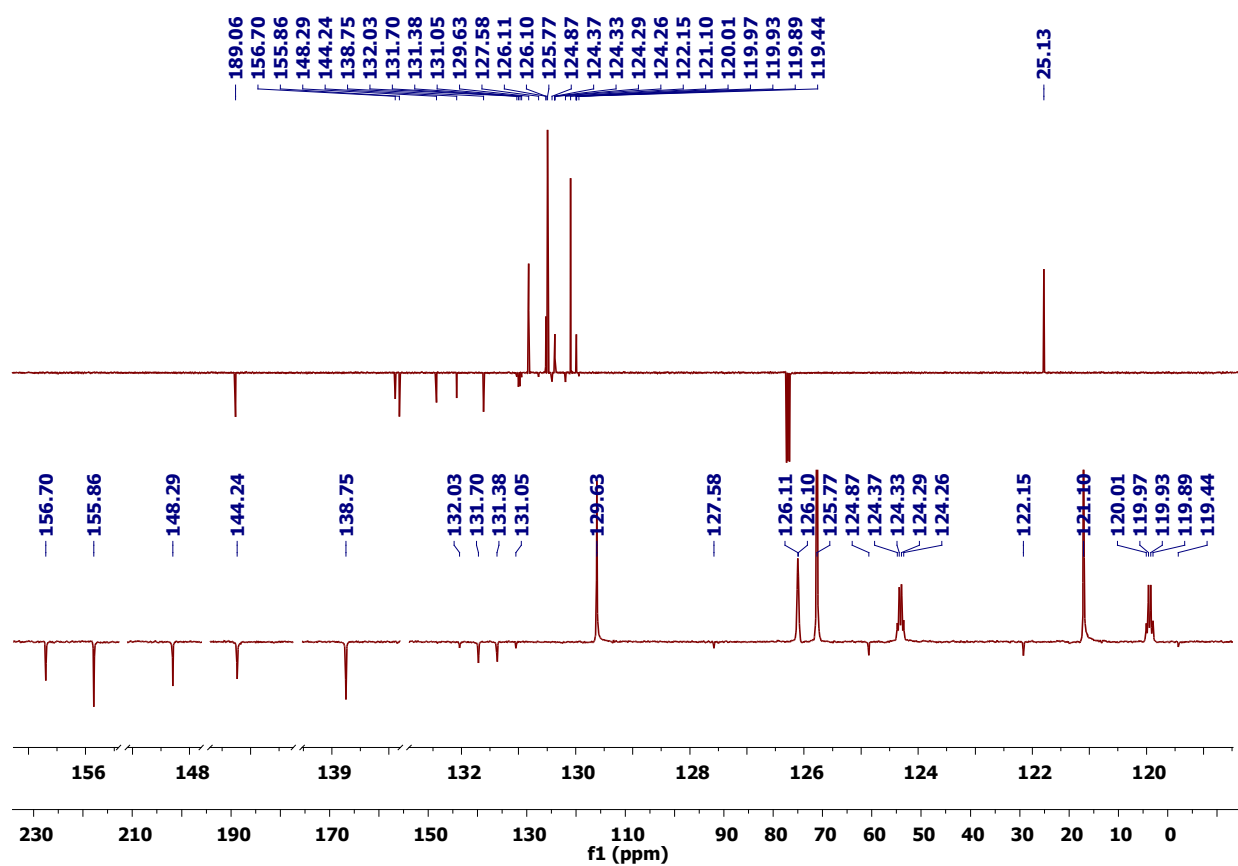

$^1\text{H}$ - $^1\text{H}$  gDQCOSY NMR ( $\text{CDCl}_3$ ) spectrum of (Z)-1-(5-((4-nitrophenyl)imino)-4-(3-(trifluoromethyl)phenyl)-4,5-dihydro-1,3,4-thiadiazol-2-yl)ethan-1-one

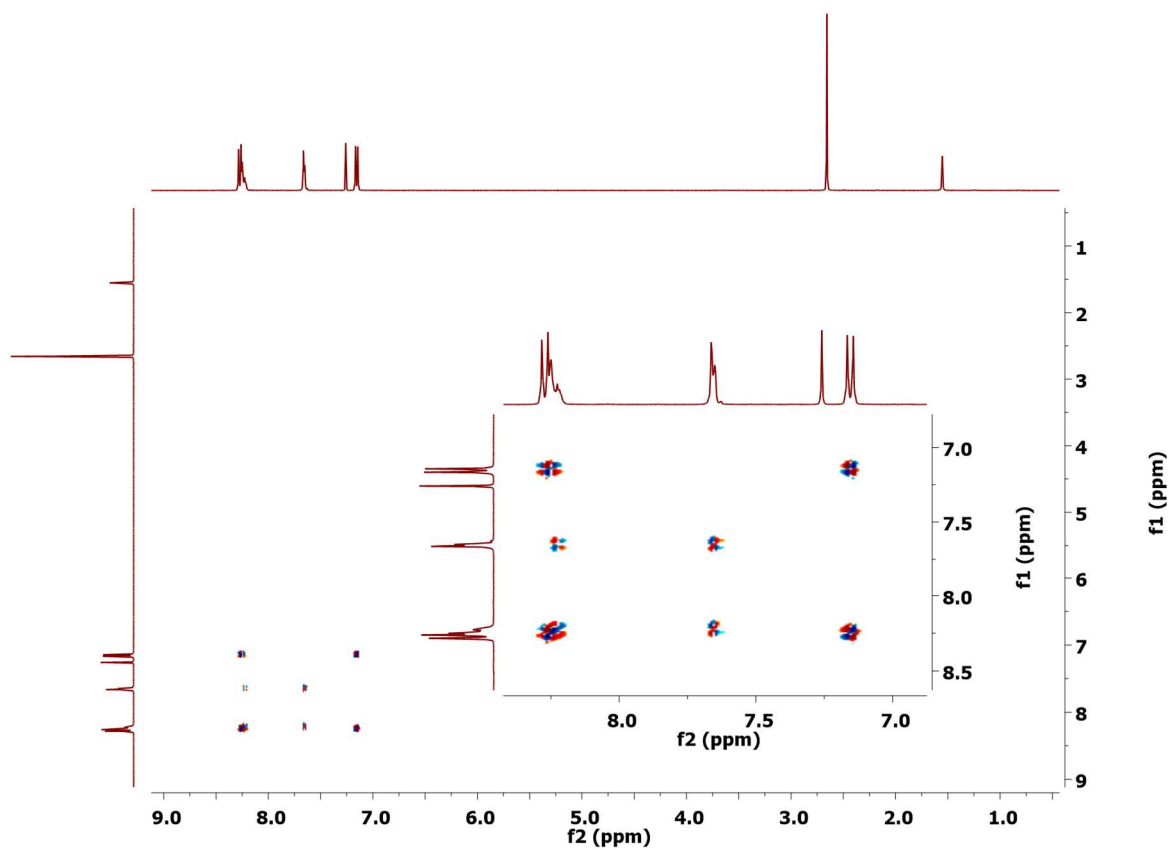

$^1\text{H}$ - $^{13}\text{C}$ -HSQC NMR ( $\text{CDCl}_3$ ) spectrum of (Z)-1-(5-((4-nitrophenyl)imino)-4-(3-(trifluoromethyl)phenyl)-4,5-dihydro-1,3,4-thiadiazol-2-yl)ethan-1-one

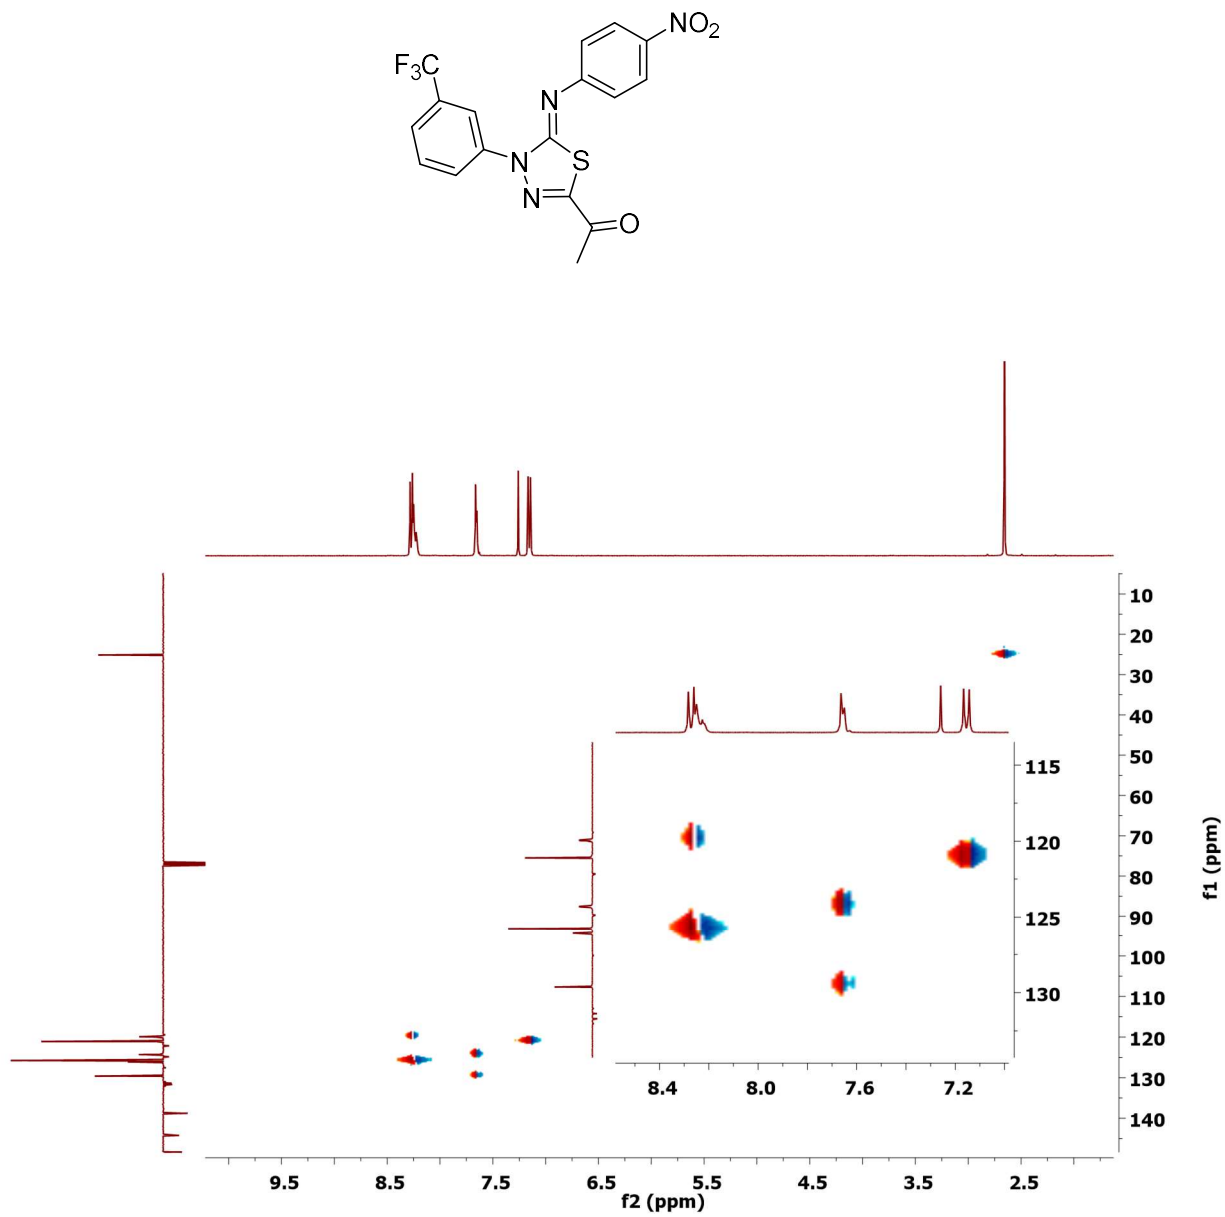



$^1\text{H}$ - $^{13}\text{C}$ -gHMBC NMR ( $\text{CDCl}_3$ ) spectrum of (Z)-1-(5-((4-nitrophenyl)imino)-4-(3-(trifluoromethyl)phenyl)-4,5-dihydro-1,3,4-thiadiazol-2-yl)ethan-1-one



$^1\text{H}$  NMR ( $\text{CDCl}_3$ ) spectrum of (Z)-1-(4-(naphthalen-1-yl)-5-((4-nitrophenyl)imino)-4,5-dihydro-1,3,4-thiadiazol-2-yl)ethan-1-one

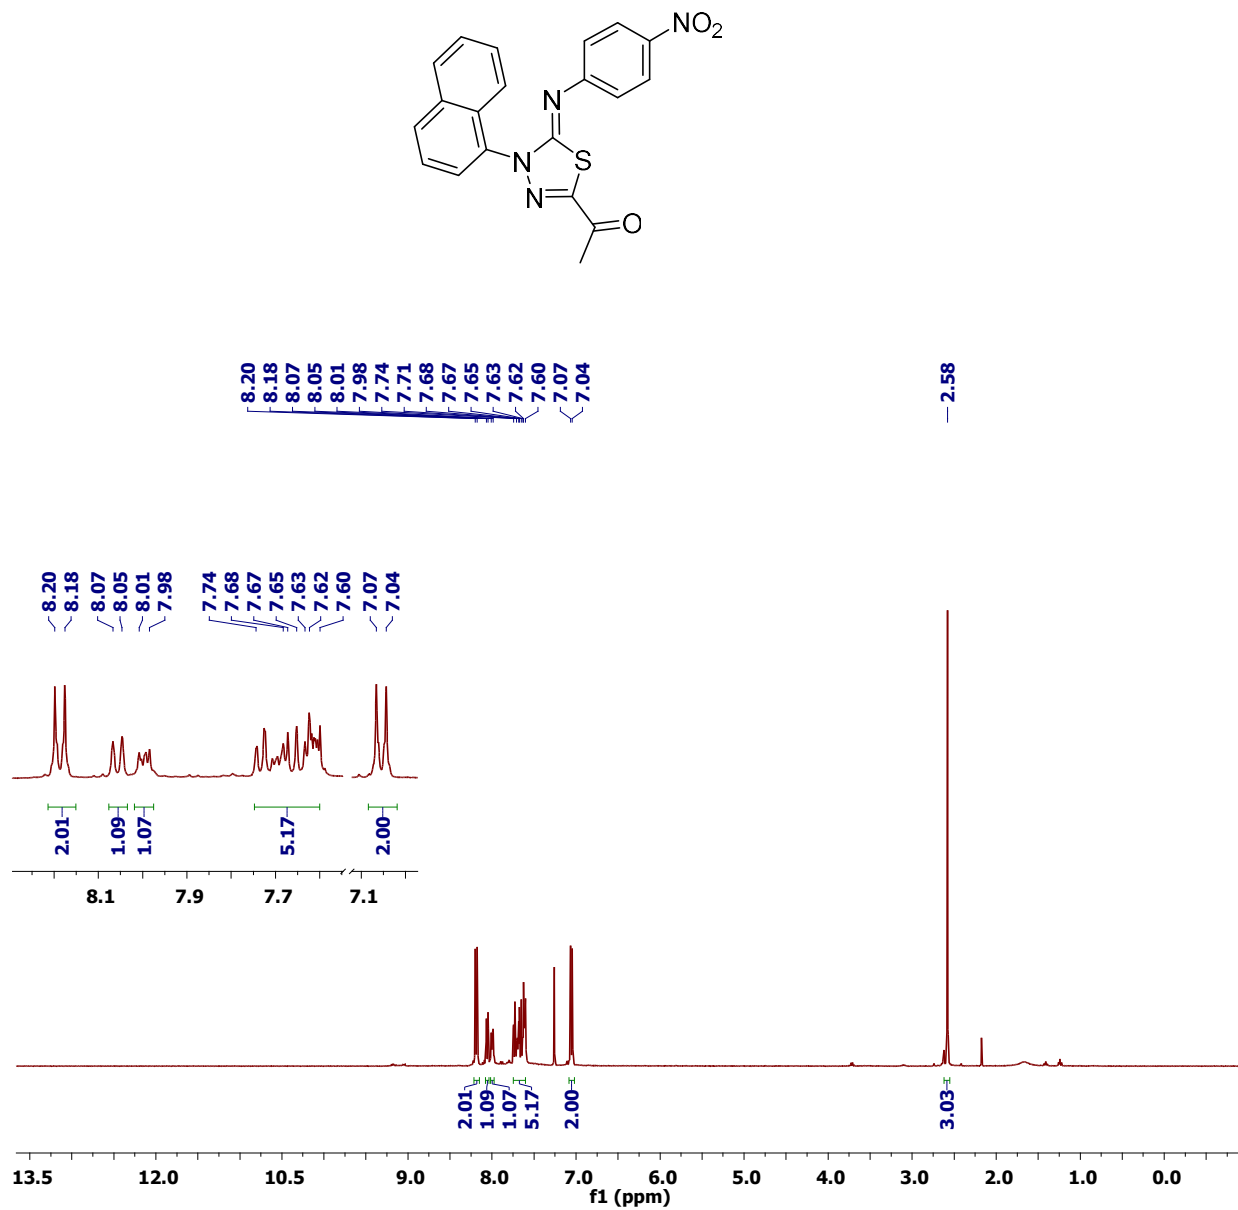

$^{13}\text{C}$  NMR ( $\text{CDCl}_3$ ) spectrum of (Z)-1-(4-(naphthalen-1-yl)-5-((4-nitrophenyl)imino)-4,5-dihydro-1,3,4-thiadiazol-2-yl)ethan-1-one

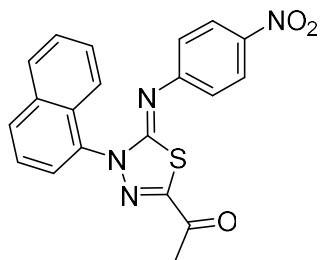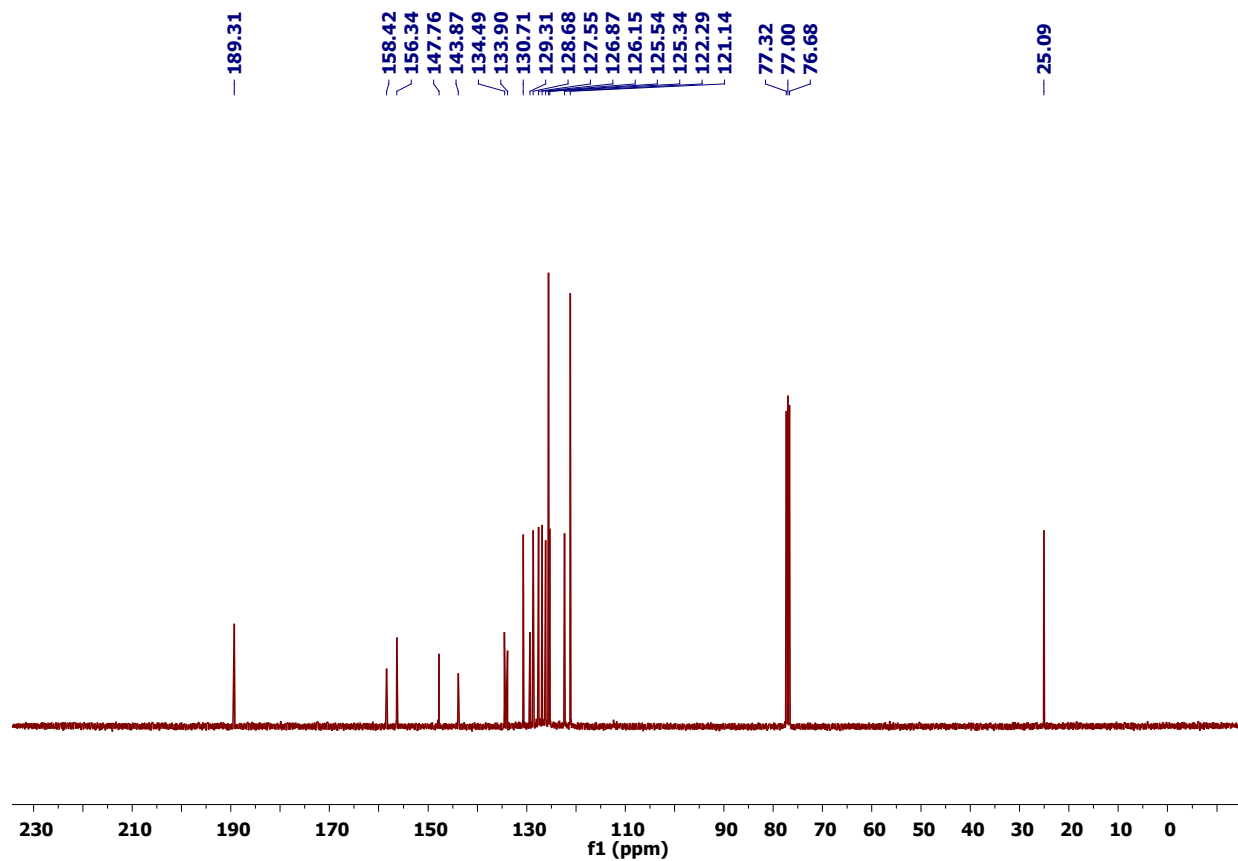

$^{13}\text{C}$  CRAPT NMR ( $\text{CDCl}_3$ ) spectrum of (Z)-1-(4-(naphthalen-1-yl)-5-((4-nitrophenyl)imino)-4,5-dihydro-1,3,4-thiadiazol-2-yl)ethan-1-one

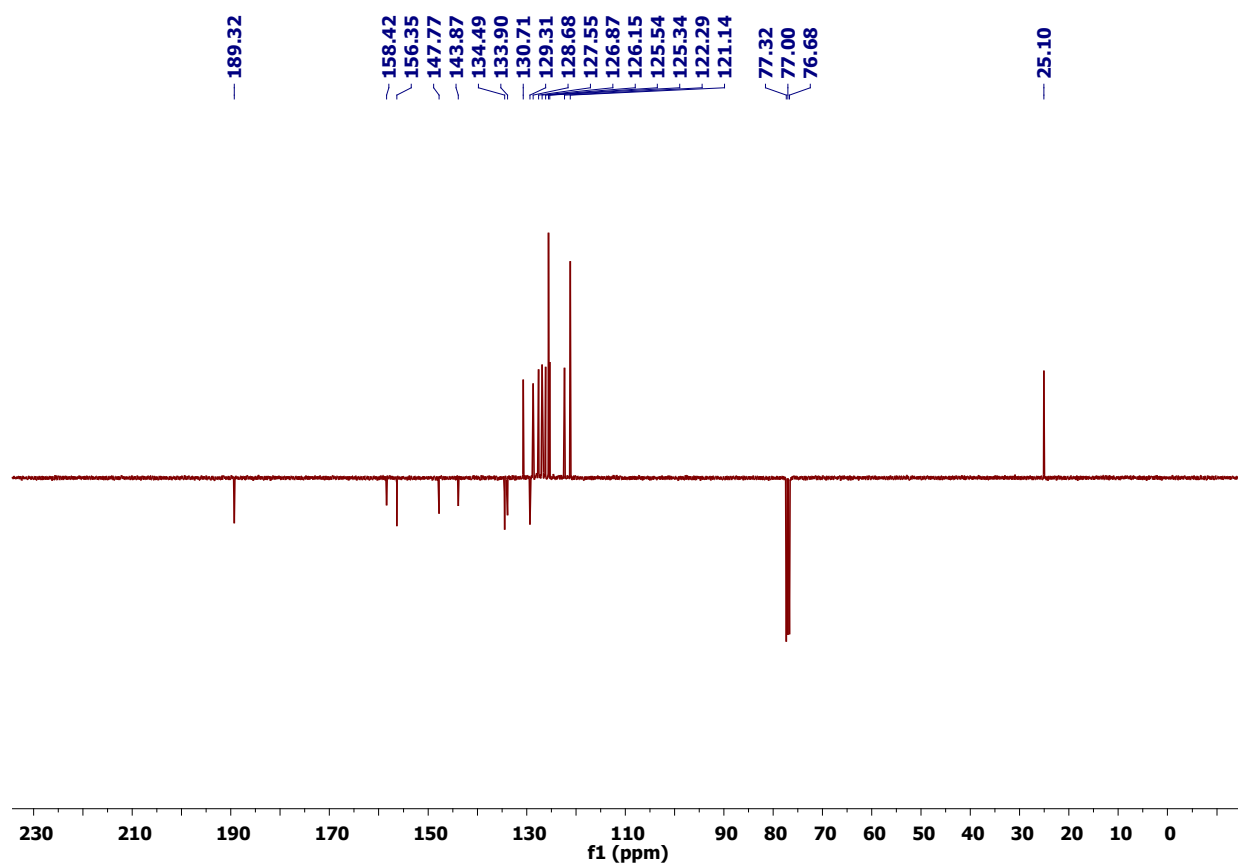

$^1\text{H}$ - $^1\text{H}$  gDQCOSY NMR ( $\text{CDCl}_3$ ) spectrum of (Z)-1-(4-(naphthalen-1-yl)-5-((4-nitrophenyl)imino)-4,5-dihydro-1,3,4-thiadiazol-2-yl)ethan-1-one

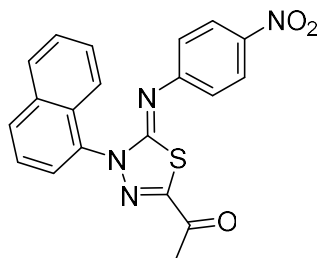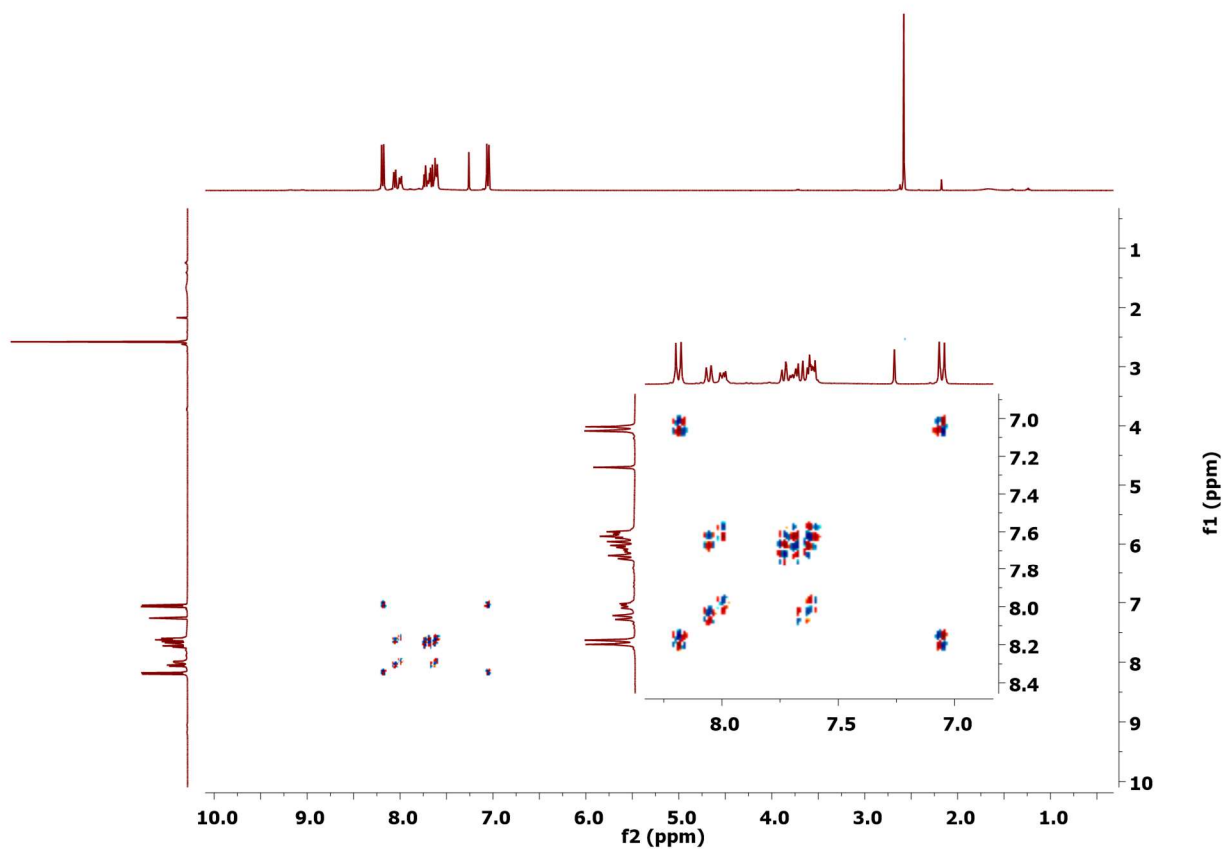

$^1\text{H}$ - $^{13}\text{C}$ -HSQC NMR ( $\text{CDCl}_3$ ) spectrum of (Z)-1-(4-(naphthalen-1-yl)-5-((4-nitrophenyl)imino)-4,5-dihydro-1,3,4-thiadiazol-2-yl)ethan-1-one

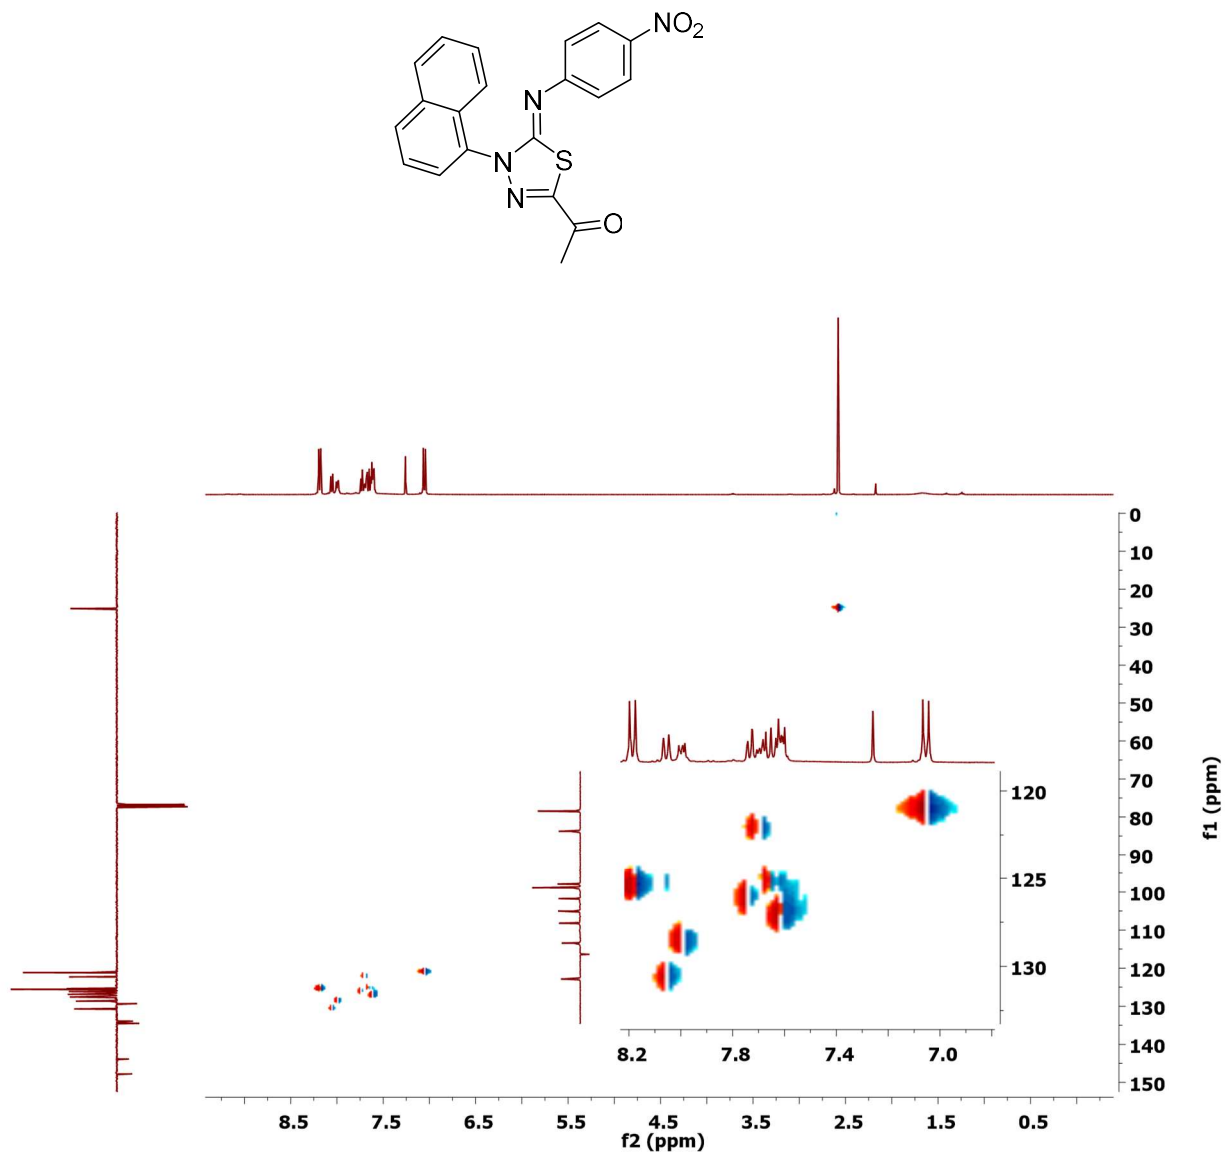

$^1\text{H}$ - $^{13}\text{C}$ -gHMBC NMR ( $\text{CDCl}_3$ ) spectrum of (Z)-1-(4-(naphthalen-1-yl)-5-((4-nitrophenyl)imino)-4,5-dihydro-1,3,4-thiadiazol-2-yl)ethan-1-one

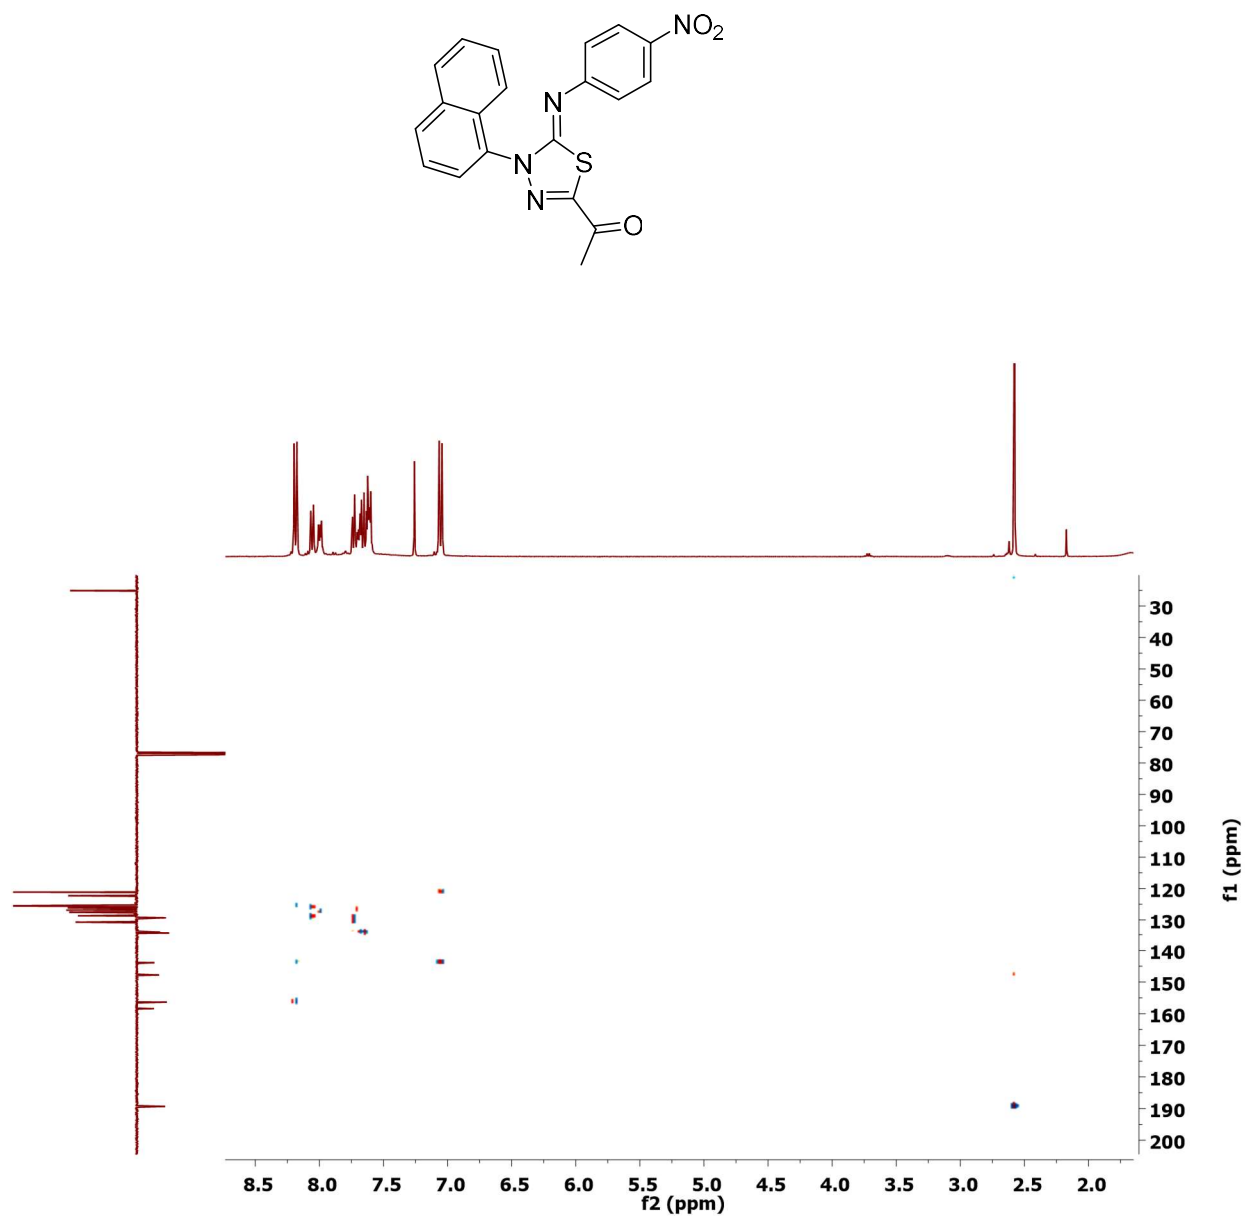

$^1\text{H}$  NMR ( $\text{CDCl}_3$ ) spectrum of (Z)-1-(4-(naphthalen-1-yl)-5-((4-methylphenyl)imino)-4,5-dihydro-1,3,4-thiadiazol-2-yl)ethan-1-one

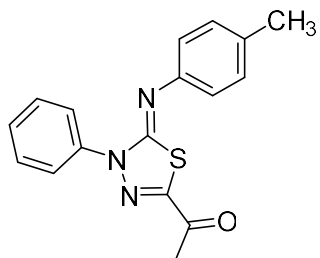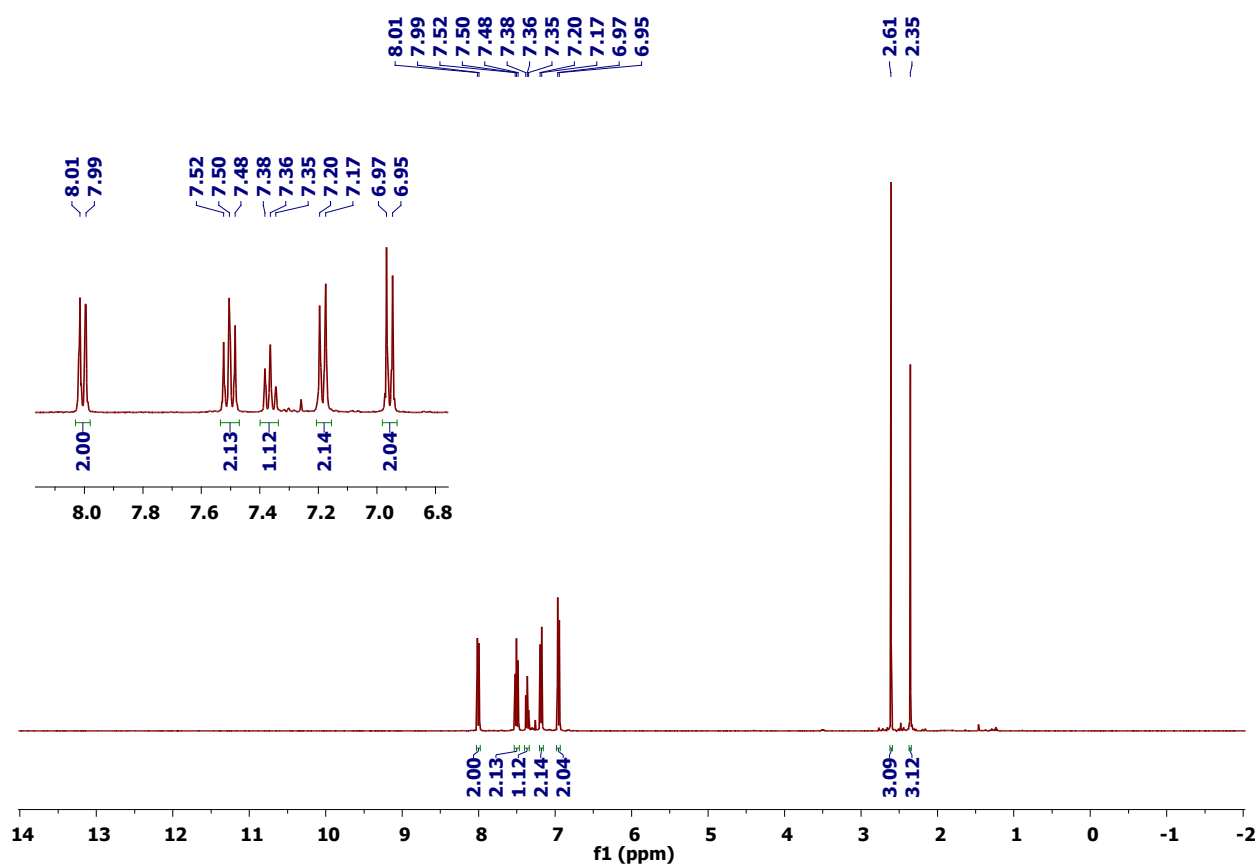



$^{13}\text{C}$  NMR ( $\text{CDCl}_3$ ) spectrum of (Z)-1-(4-(naphthalen-1-yl)-5-((4-nitrophenyl)imino)-4,5-dihydro-1,3,4-thiadiazol-2-yl)ethan-1-one

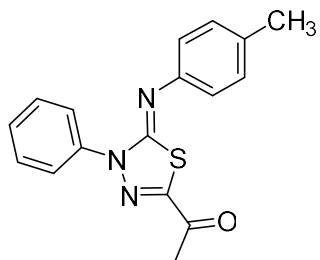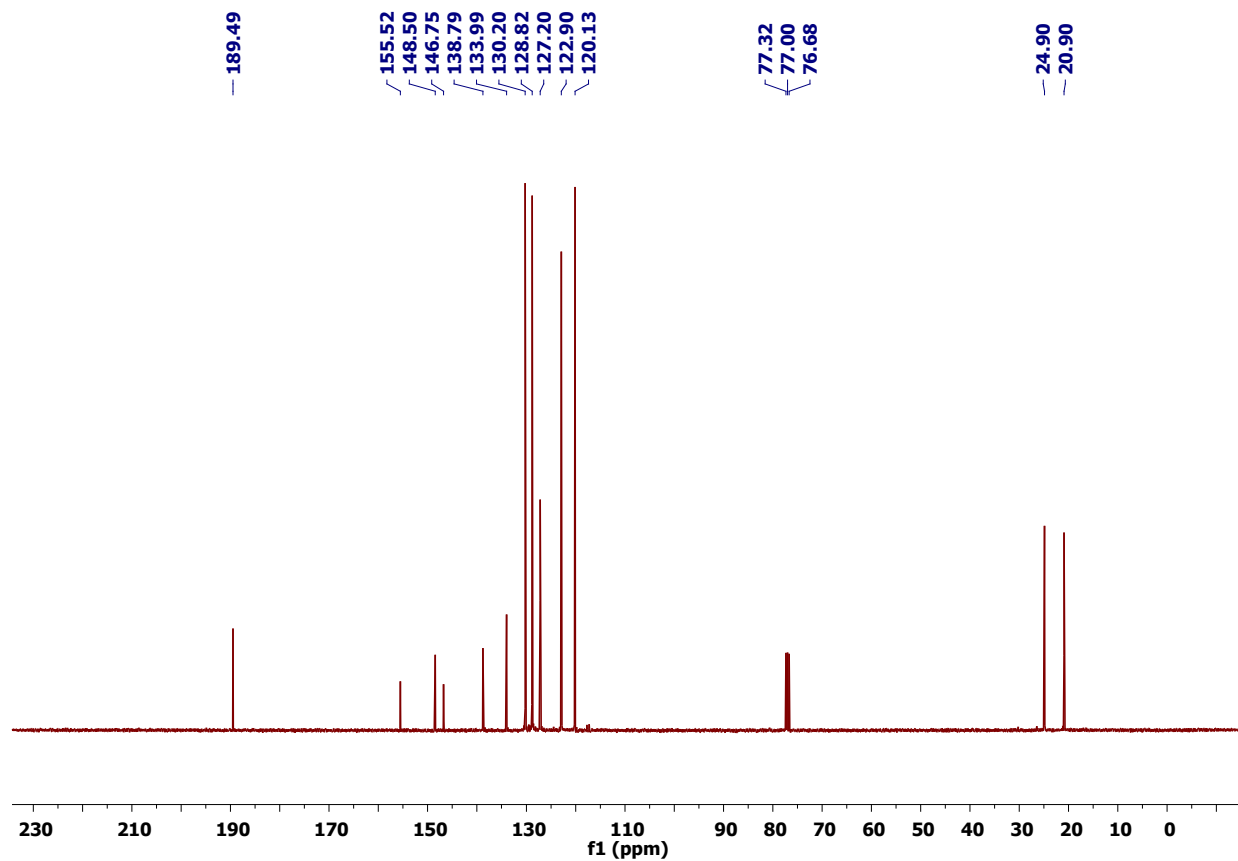

$^{13}\text{C}$  CRAPT NMR ( $\text{CDCl}_3$ ) spectrum of (Z)-1-(4-(naphthalen-1-yl)-5-((4-nitrophenyl)imino)-4,5-dihydro-1,3,4-thiadiazol-2-yl)ethan-1-one

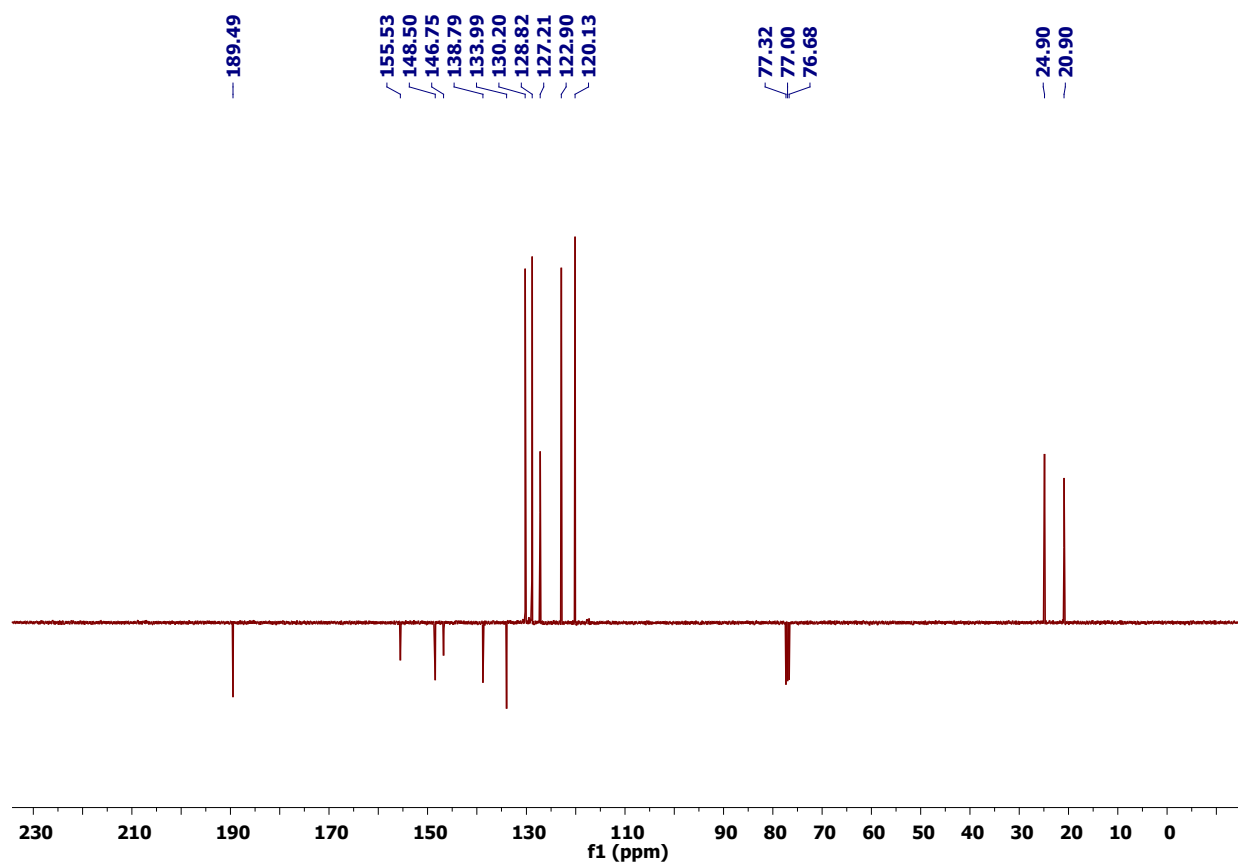

$^1\text{H}$ - $^1\text{H}$  gDQCOSY NMR ( $\text{CDCl}_3$ ) spectrum of (Z)-1-(4-(naphthalen-1-yl)-5-((4-nitrophenyl)imino)-4,5-dihydro-1,3,4-thiadiazol-2-yl)ethan-1-one

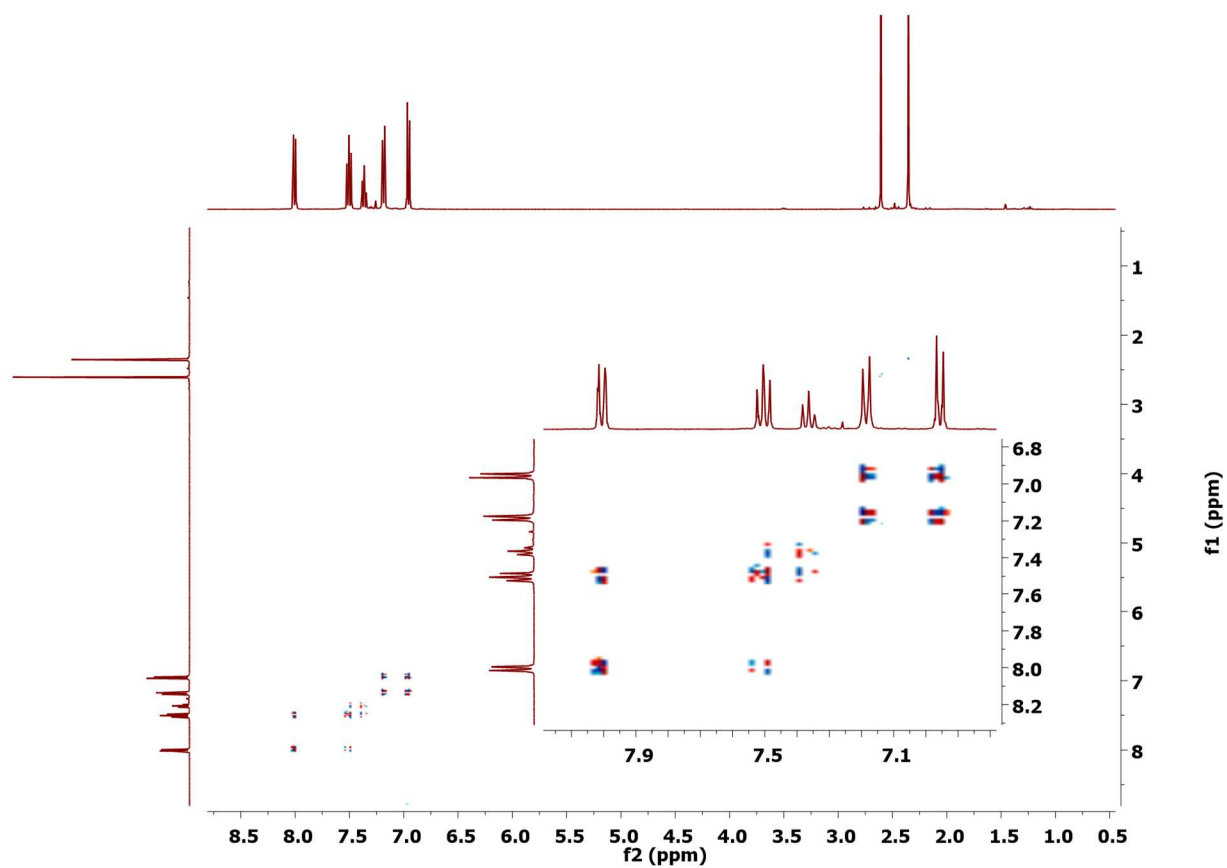

$^1\text{H}$ - $^{13}\text{C}$ -HSQC NMR ( $\text{CDCl}_3$ ) spectrum of (Z)-1-(4-(naphthalen-1-yl)-5-((4-nitrophenyl)imino)-4,5-dihydro-1,3,4-thiadiazol-2-yl)ethan-1-one

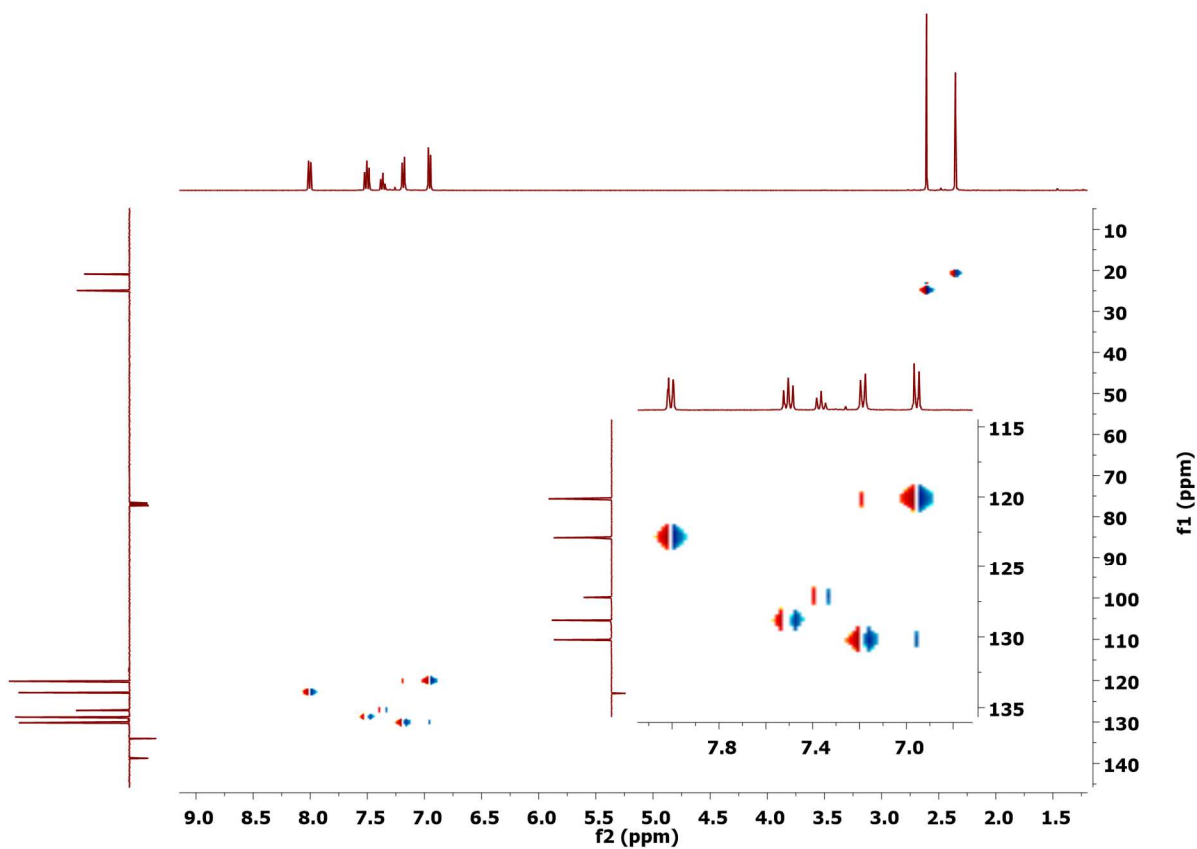

$^1\text{H}$ - $^{13}\text{C}$ -gHMBC NMR ( $\text{CDCl}_3$ ) spectrum of (Z)-1-(4-(naphthalen-1-yl)-5-((4-nitrophenyl)imino)-4,5-dihydro-1,3,4-thiadiazol-2-yl)ethan-1-one

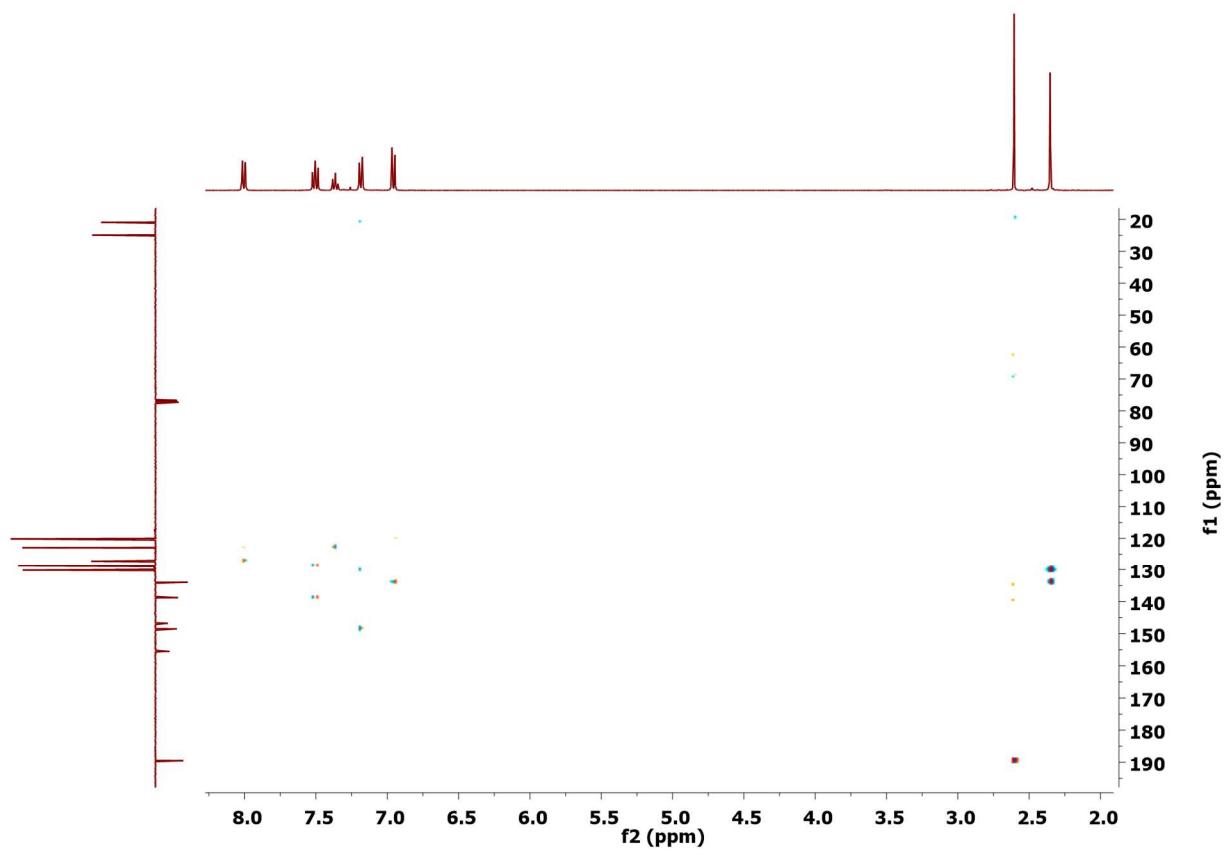

$^1\text{H}$  NMR ( $\text{CDCl}_3$ ) spectrum of (Z)-1-(5-(phenylimino)-4-(p-tolyl)-4,5-dihydro-1,3,4-thiadiazol-2-yl)ethan-1-one

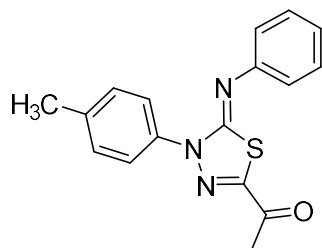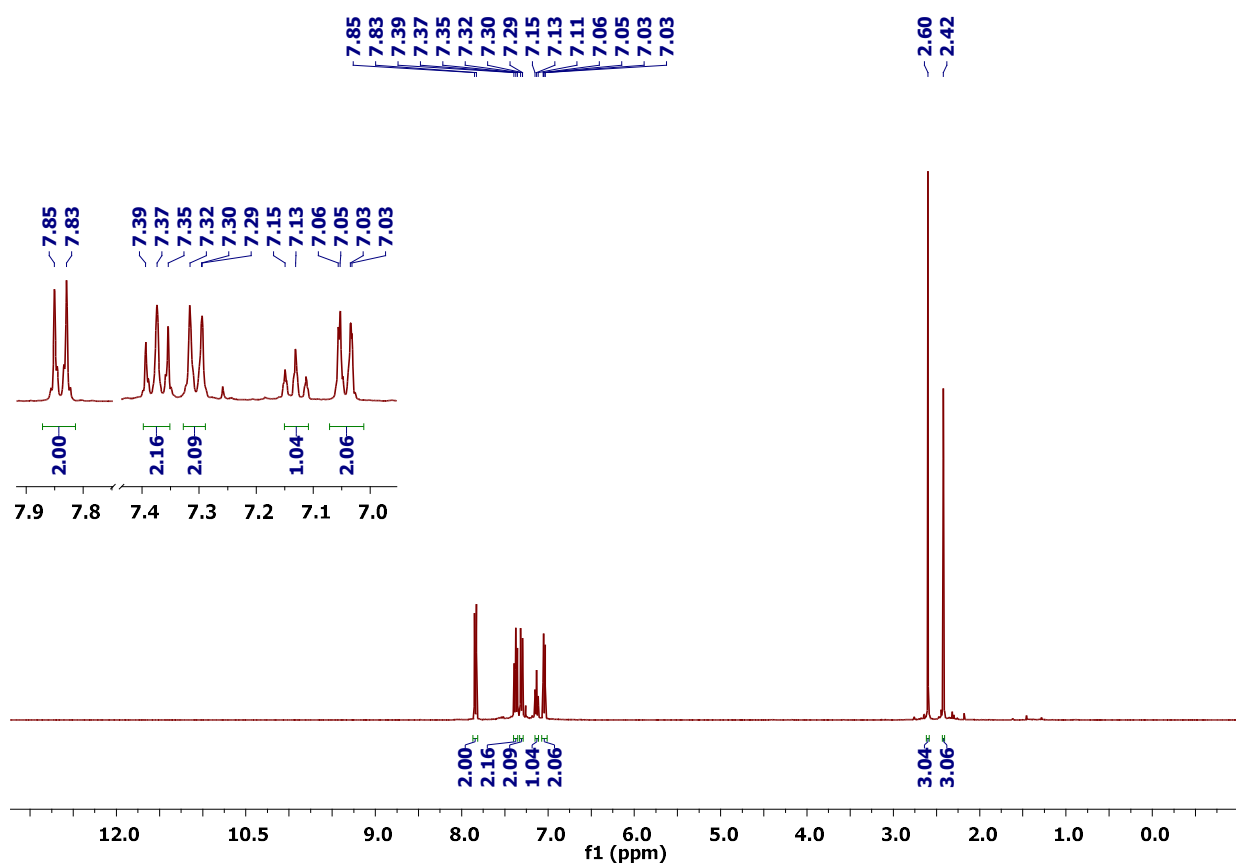

$^{13}\text{C}$  NMR ( $\text{CDCl}_3$ ) spectrum of (Z)-1-(5-(phenylimino)-4-(p-tolyl)-4,5-dihydro-1,3,4-thiadiazol-2-yl)ethan-1-one

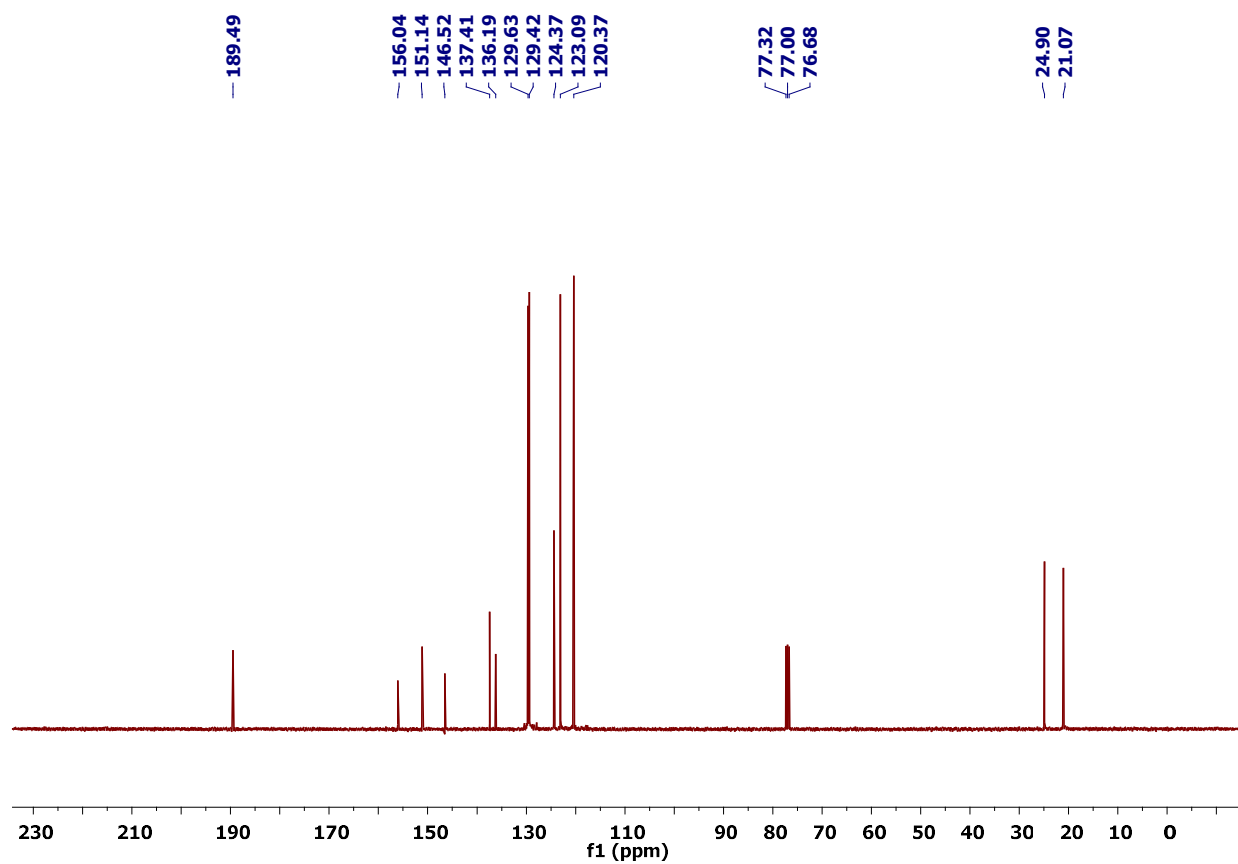

$^{13}\text{C}$  CRAPT NMR ( $\text{CDCl}_3$ ) spectrum of (Z)-1-(5-(phenylimino)-4-(p-tolyl)-4,5-dihydro-1,3,4-thiadiazol-2-yl)ethan-1-one

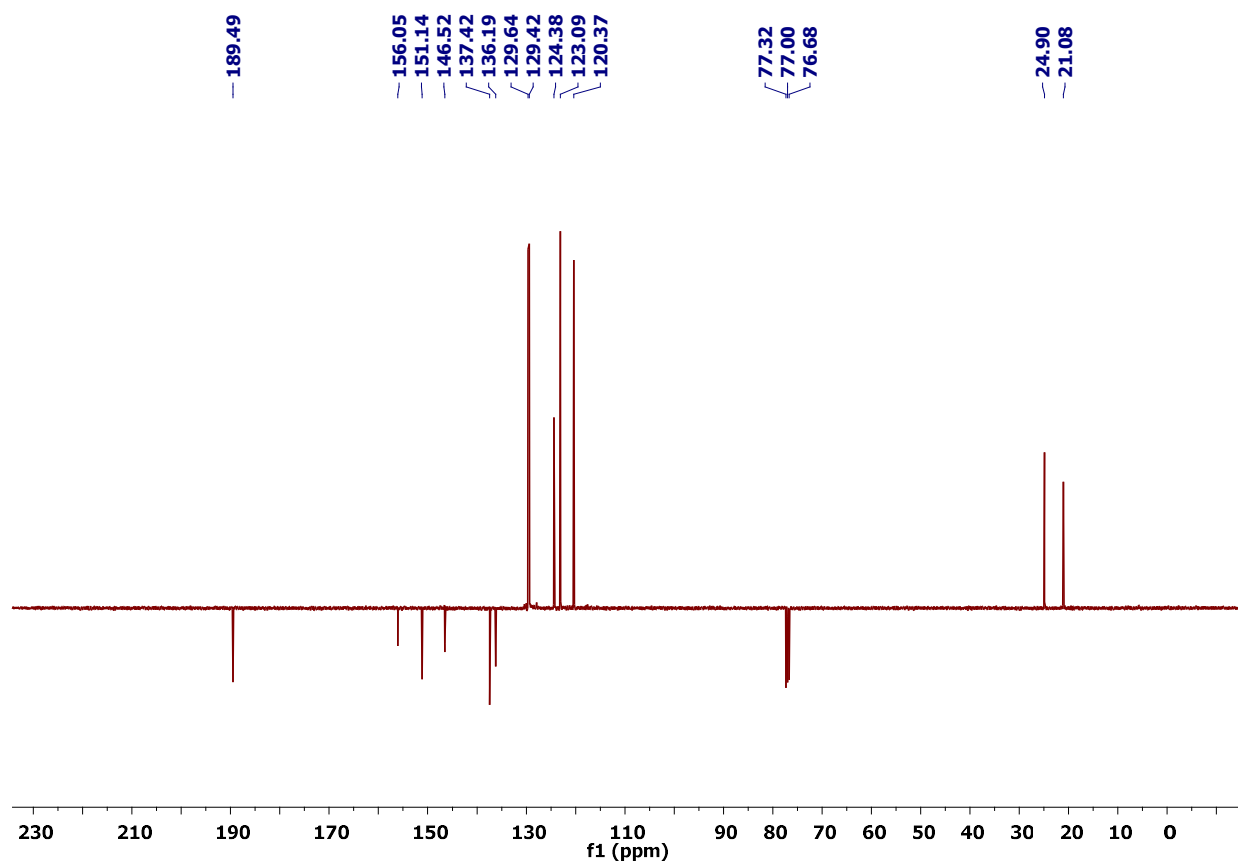



$^1\text{H}$ - $^1\text{H}$  gDQCOSY NMR ( $\text{CDCl}_3$ ) spectrum of (Z)-1-(5-(phenylimino)-4-(p-tolyl)-4,5-dihydro-1,3,4-thiadiazol-2-yl)ethan-1-one

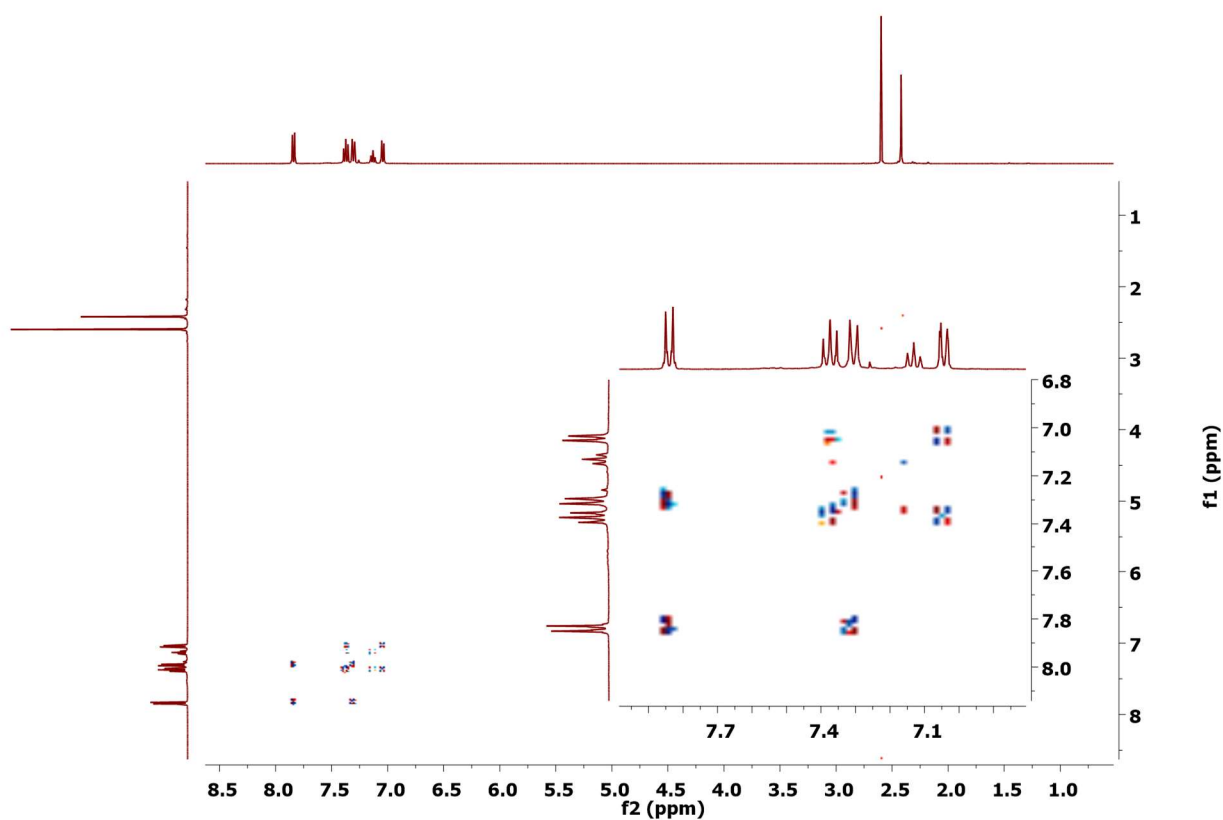

$^1\text{H}$ - $^{13}\text{C}$ -HSQC NMR ( $\text{CDCl}_3$ ) spectrum of (Z)-1-(5-(phenylimino)-4-(p-tolyl)-4,5-dihydro-1,3,4-thiadiazol-2-yl)ethan-1-one

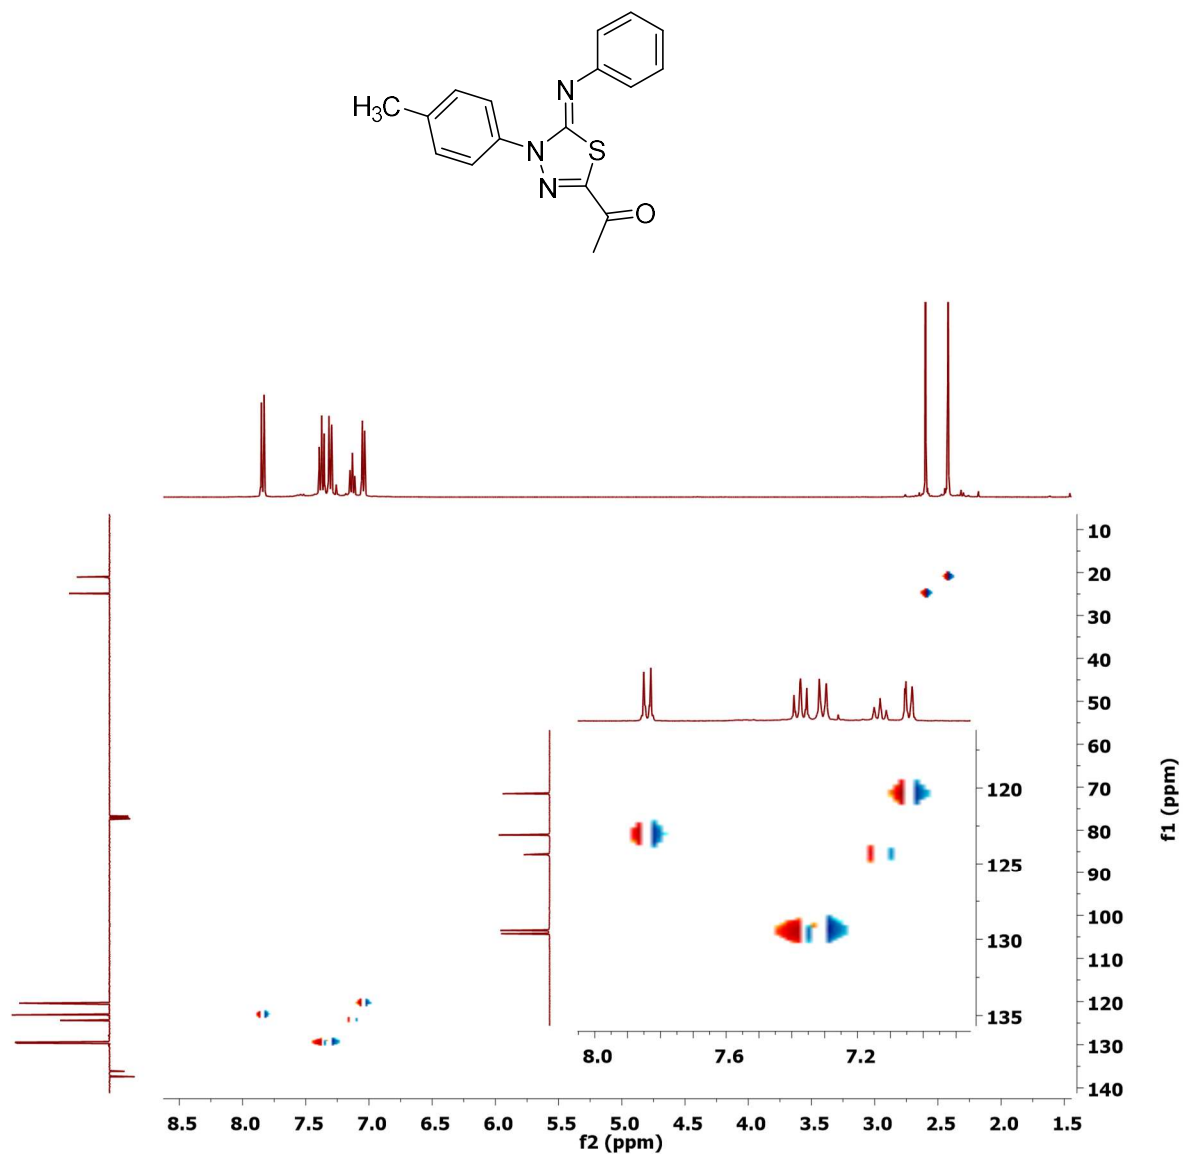

$^1\text{H}$ - $^{13}\text{C}$ -gHMBC NMR ( $\text{CDCl}_3$ ) spectrum of (Z)-1-(5-(phenylimino)-4-(p-tolyl)-4,5-dihydro-1,3,4-thiadiazol-2-yl)ethan-1-one

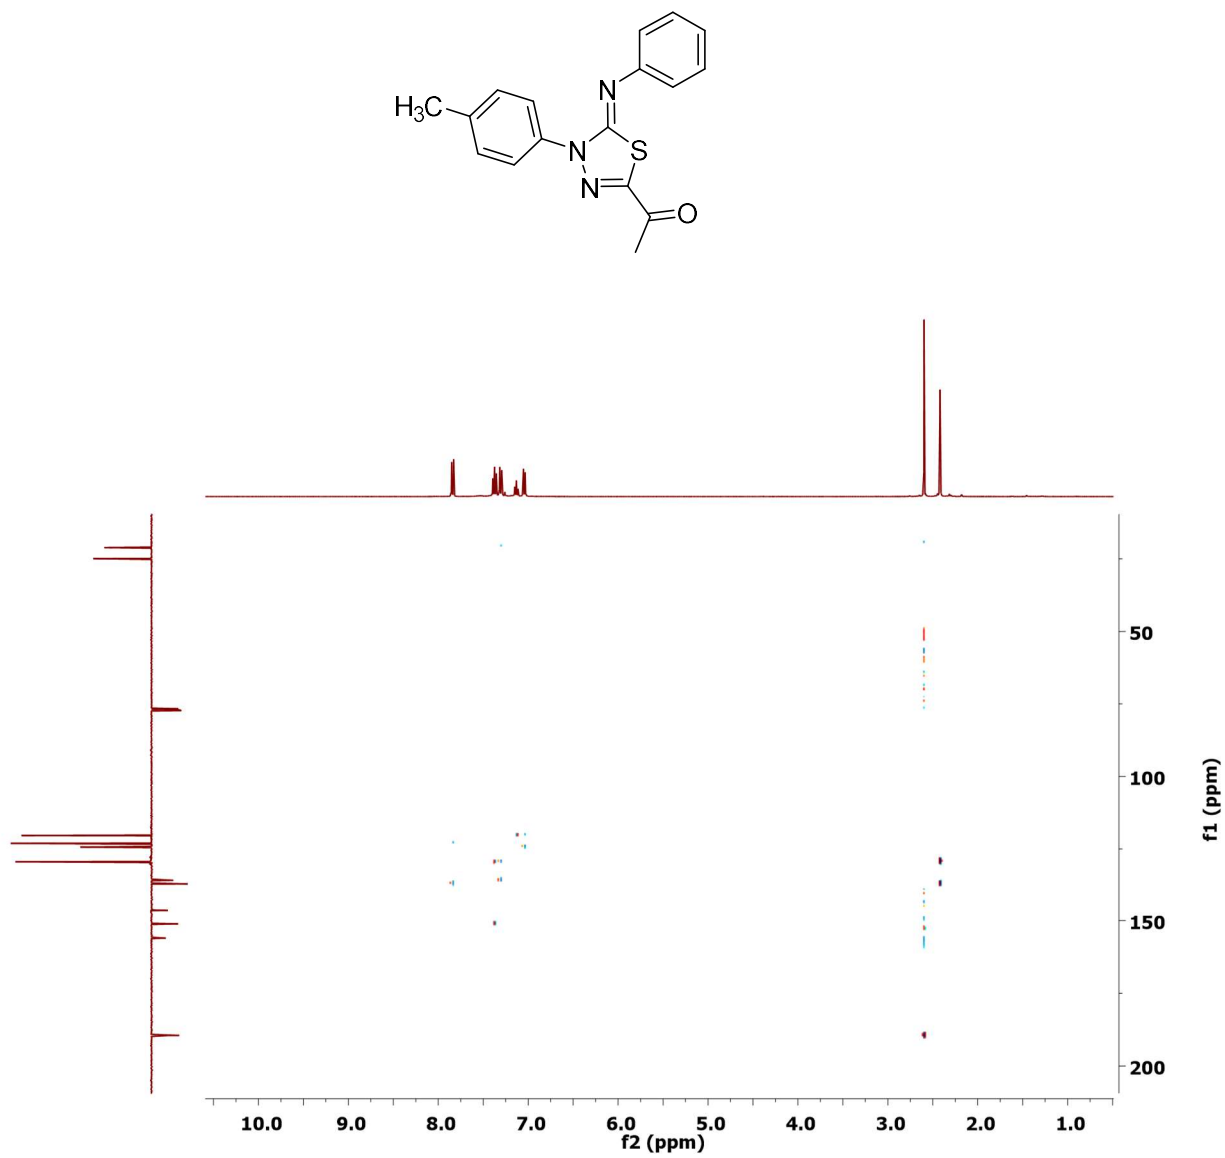

$^1\text{H}$  NMR ( $\text{CDCl}_3$ ) spectrum of (Z)-1-(4-phenyl-5-(phenylimino)-4,5-dihydro-1,3,4-thiadiazol-2-yl)ethan-1-one

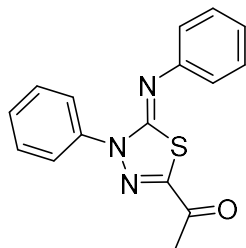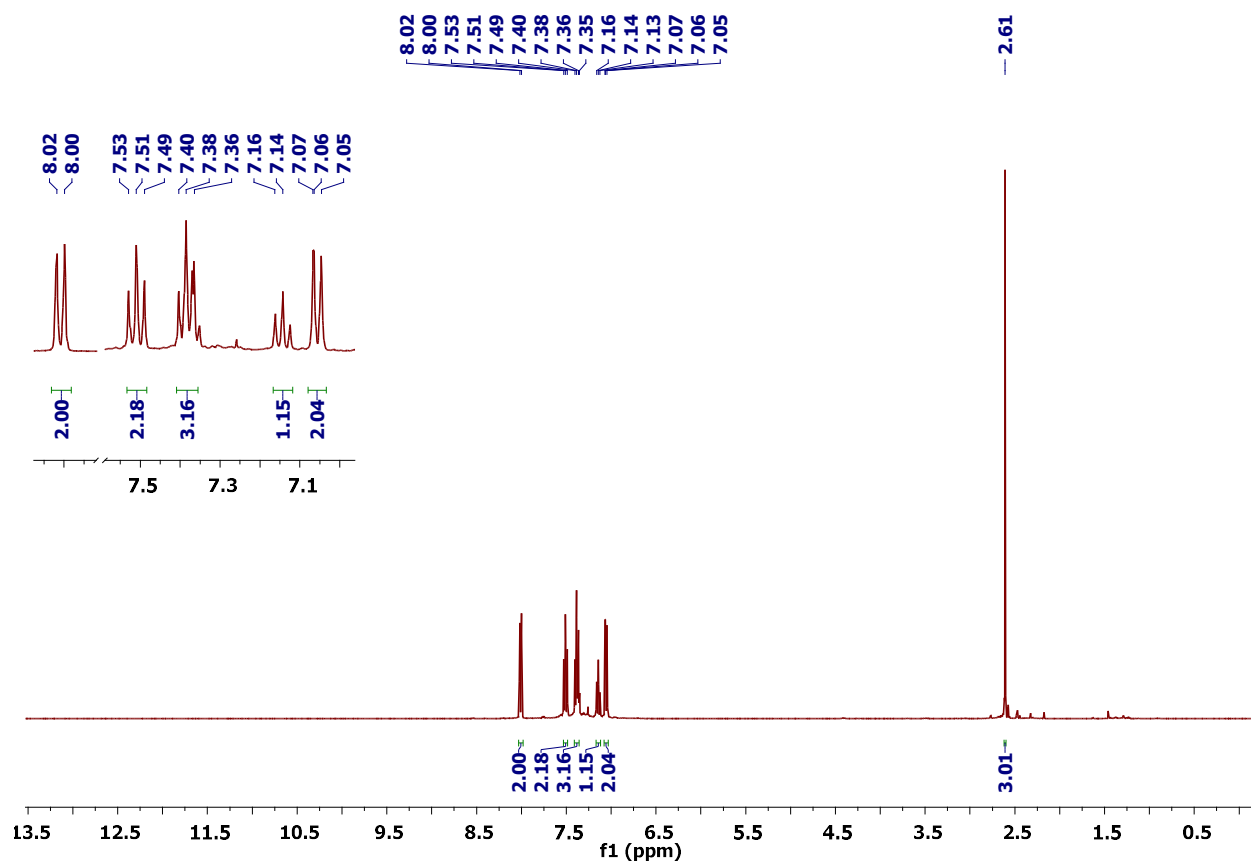

$^{13}\text{C}$  NMR ( $\text{CDCl}_3$ ) spectrum of (Z)-1-(4-phenyl-5-(phenylimino)-4,5-dihydro-1,3,4-thiadiazol-2-yl)ethan-1-one

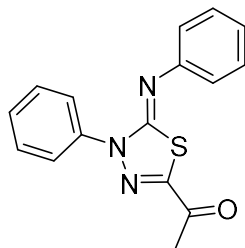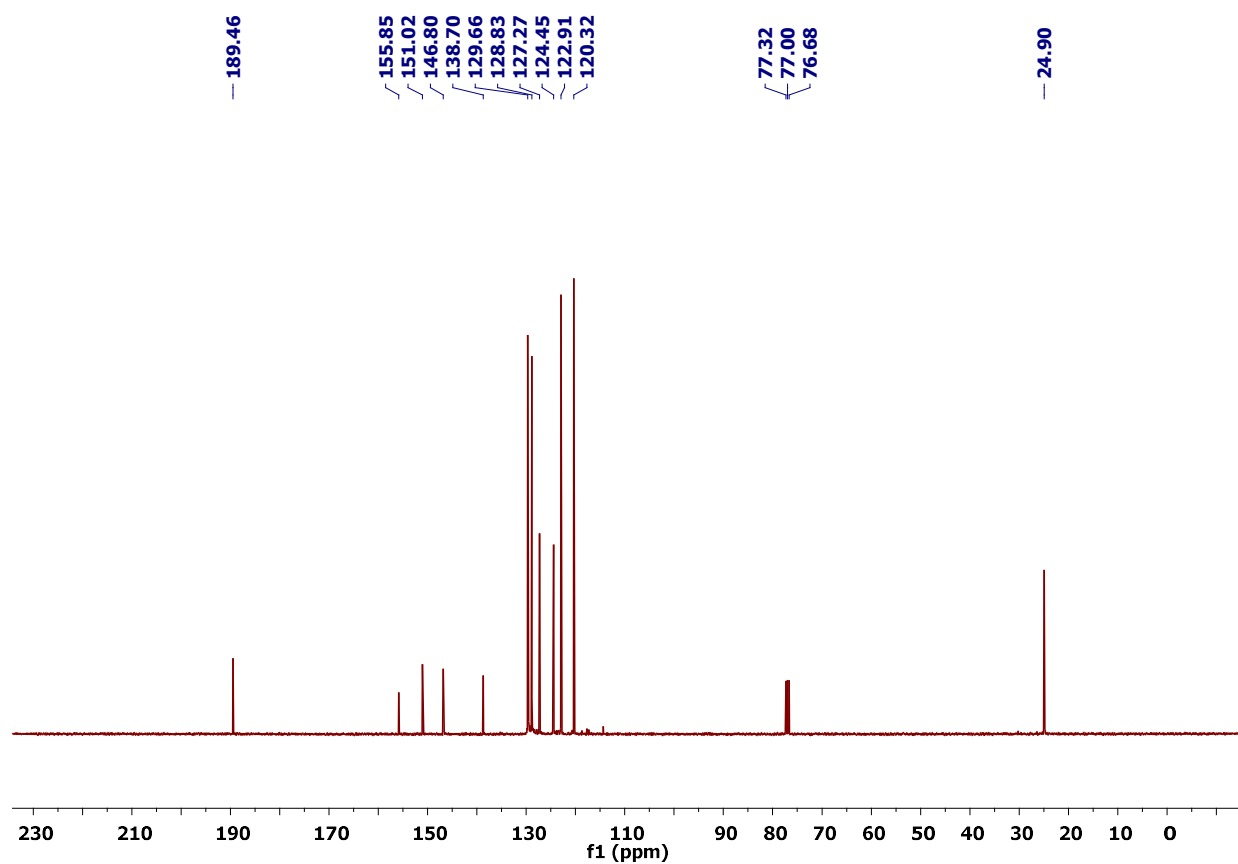

$^{13}\text{C}$  CRAPT NMR ( $\text{CDCl}_3$ ) spectrum of (Z)-1-(4-phenyl-5-(phenylimino)-4,5-dihydro-1,3,4-thiadiazol-2-yl)ethan-1-one

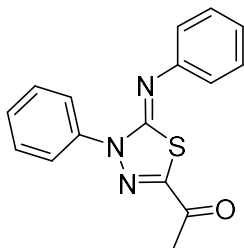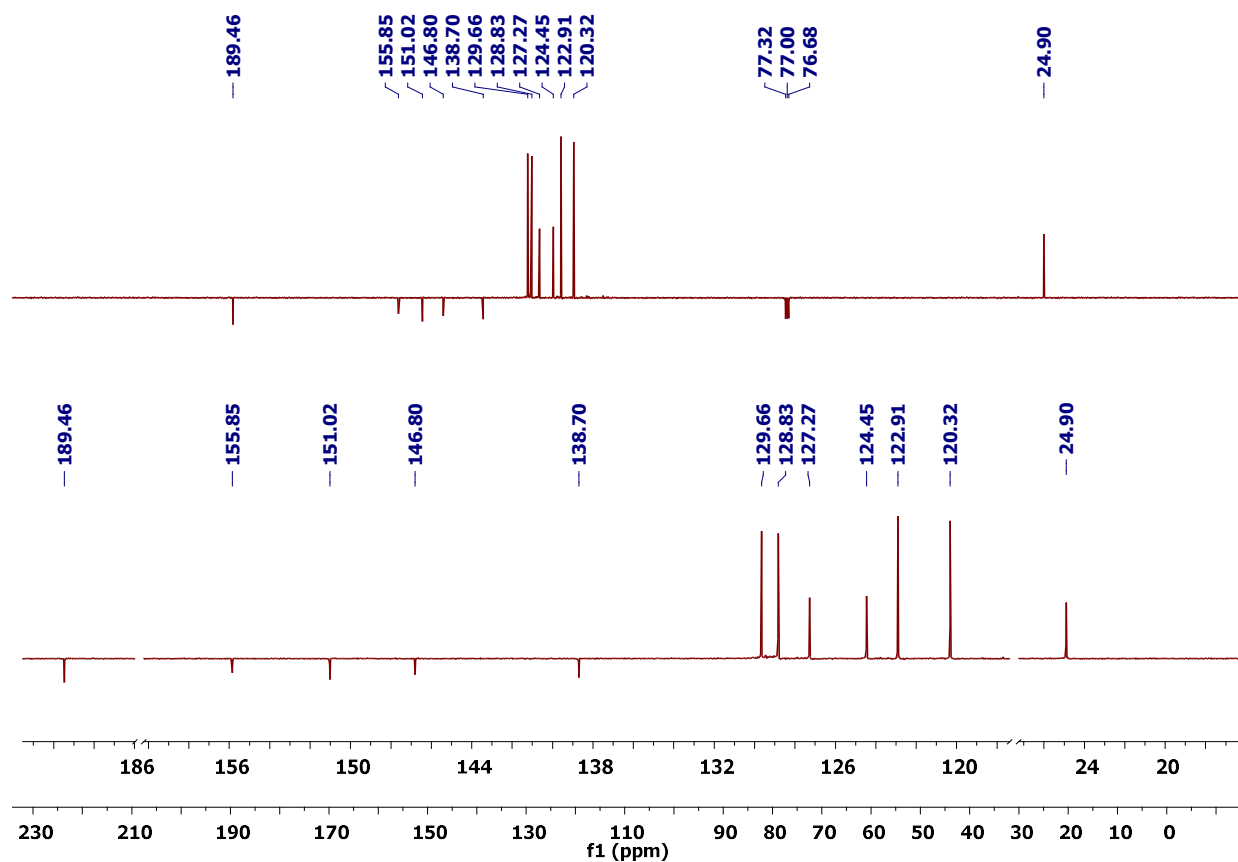

$^1\text{H}$ - $^1\text{H}$  gDQCOSY NMR ( $\text{CDCl}_3$ ) spectrum of (Z)-1-(4-phenyl-5-(phenylimino)-4,5-dihydro-1,3,4-thiadiazol-2-yl)ethan-1-one

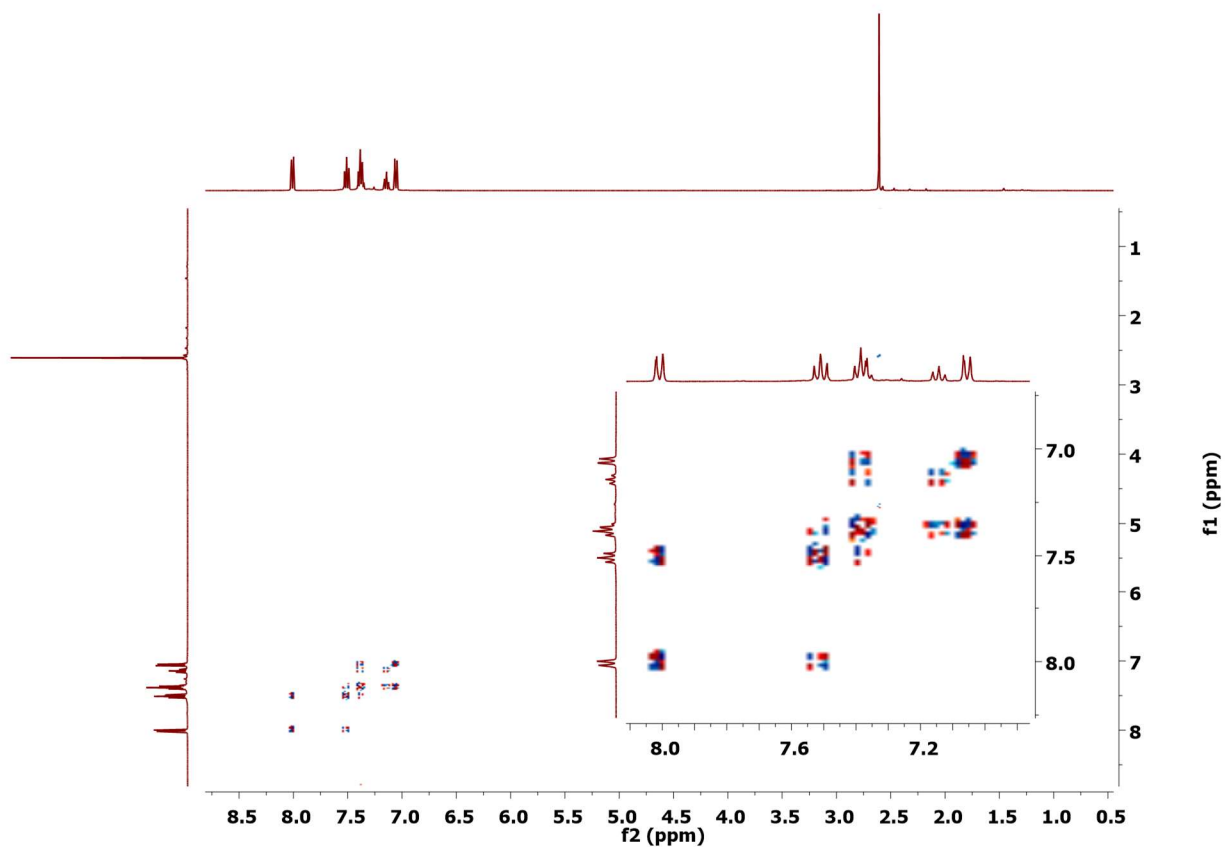

$^1\text{H}$ - $^{13}\text{C}$ -HSQC NMR ( $\text{CDCl}_3$ ) spectrum of (Z)-1-(4-phenyl-5-(phenylimino)-4,5-dihydro-1,3,4-thiadiazol-2-yl)ethan-1-one

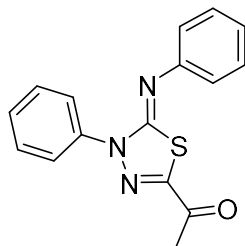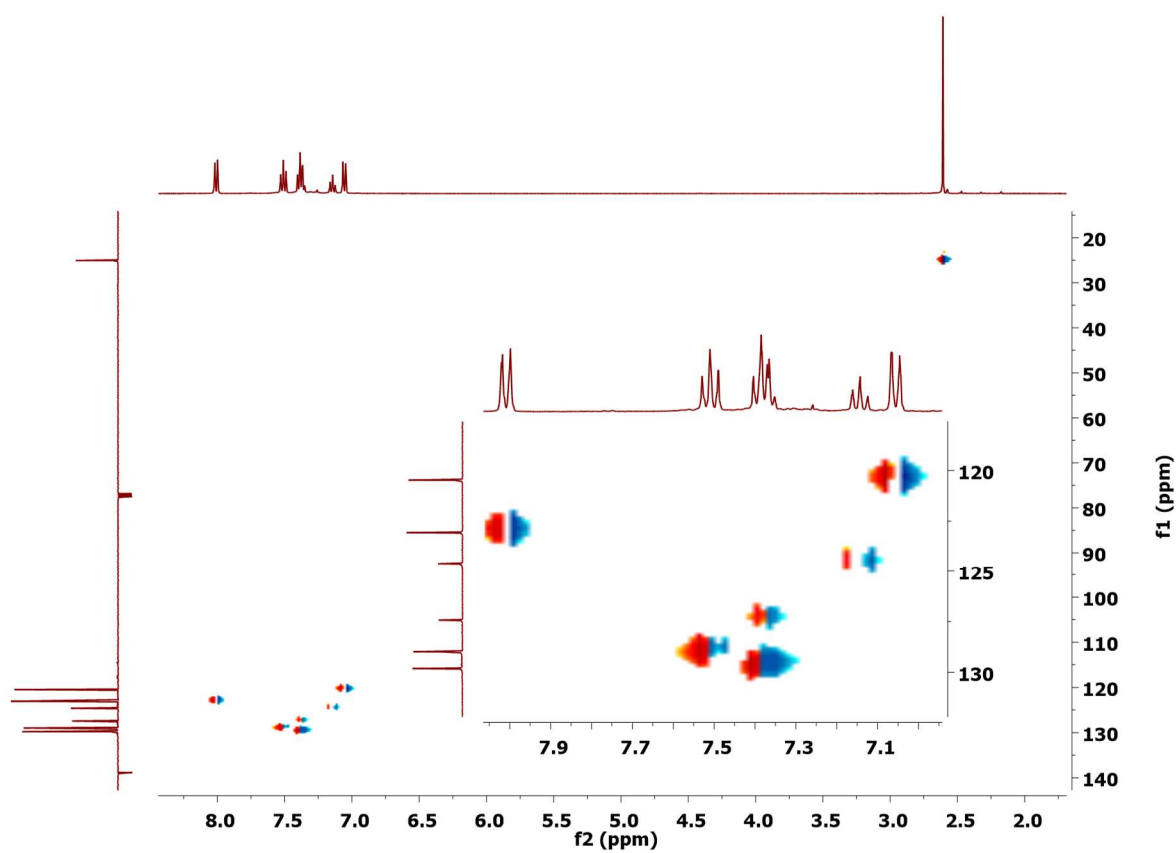



$^1\text{H}$ - $^{13}\text{C}$ -gHMBC NMR ( $\text{CDCl}_3$ ) spectrum of (Z)-1-(4-phenyl-5-(phenylimino)-4,5-dihydro-1,3,4-thiadiazol-2-yl)ethan-1-one

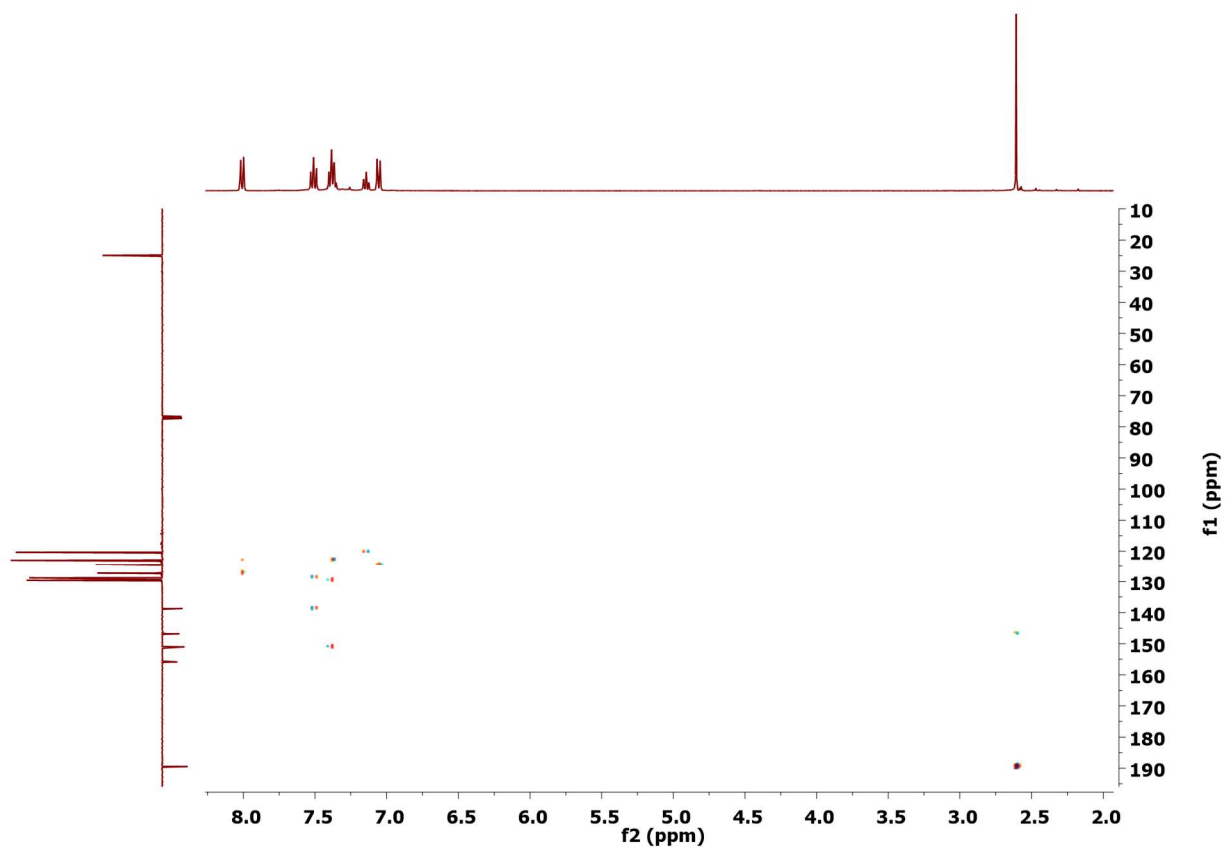

$^1\text{H}$  NMR ( $\text{CDCl}_3$ ) spectrum of (Z)-1-(5-((4-ethylphenyl)imino)-4-(p-tolyl)-4,5-dihydro-1,3,4-thiadiazol-2-yl)ethan-1-one

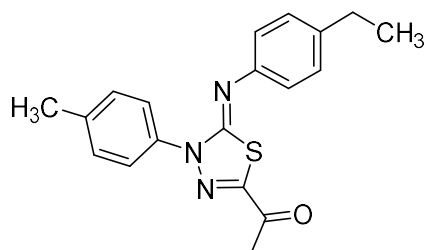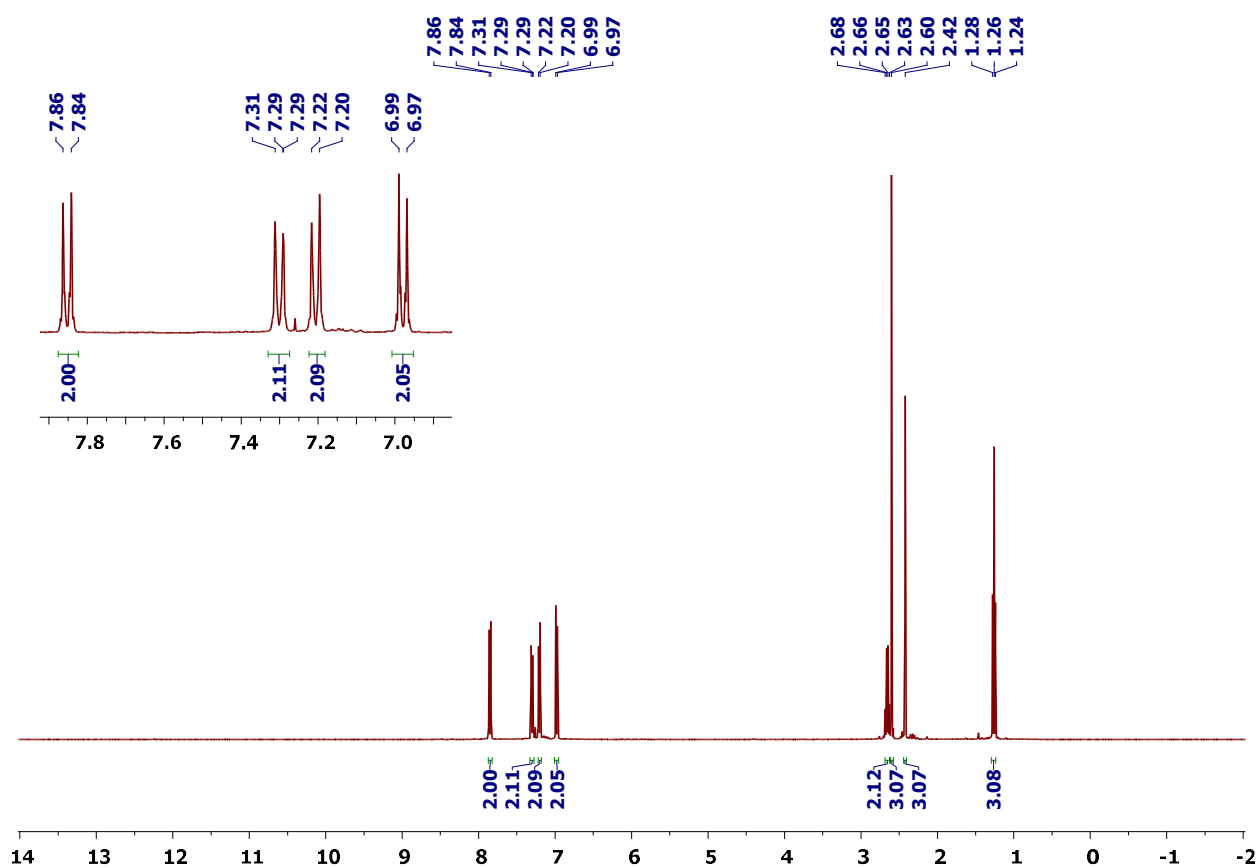

$^{13}\text{C}$  NMR ( $\text{CDCl}_3$ ) spectrum of (Z)-1-(5-((4-ethylphenyl)imino)-4-(p-tolyl)-4,5-dihydro-1,3,4-thiadiazol-2-yl)ethan-1-one

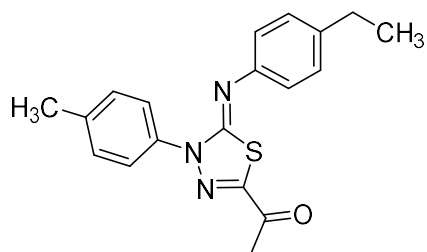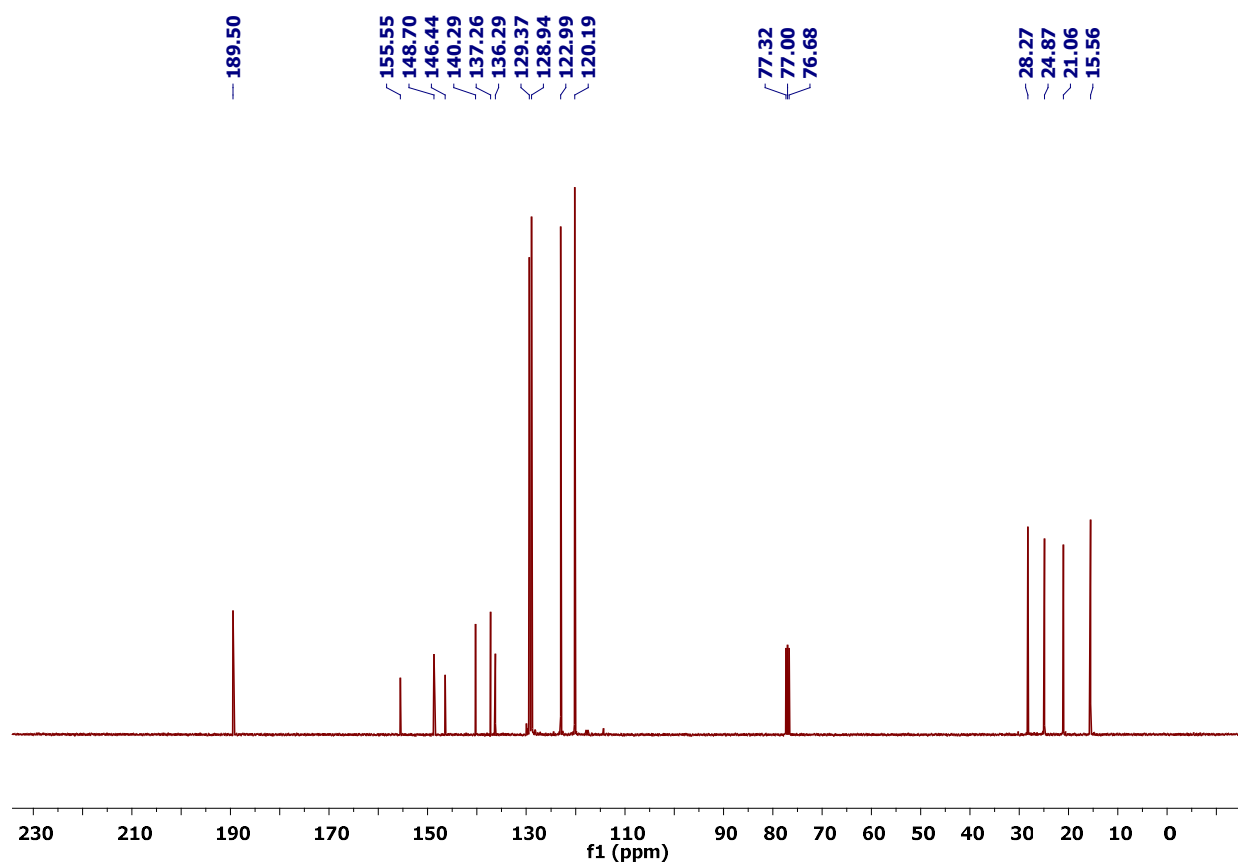

$^{13}\text{C}$  CRAPT NMR ( $\text{CDCl}_3$ ) spectrum of (Z)-1-(5-((4-ethylphenyl)imino)-4-(p-tolyl)-4,5-dihydro-1,3,4-thiadiazol-2-yl)ethan-1-one

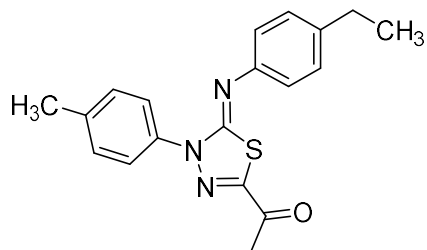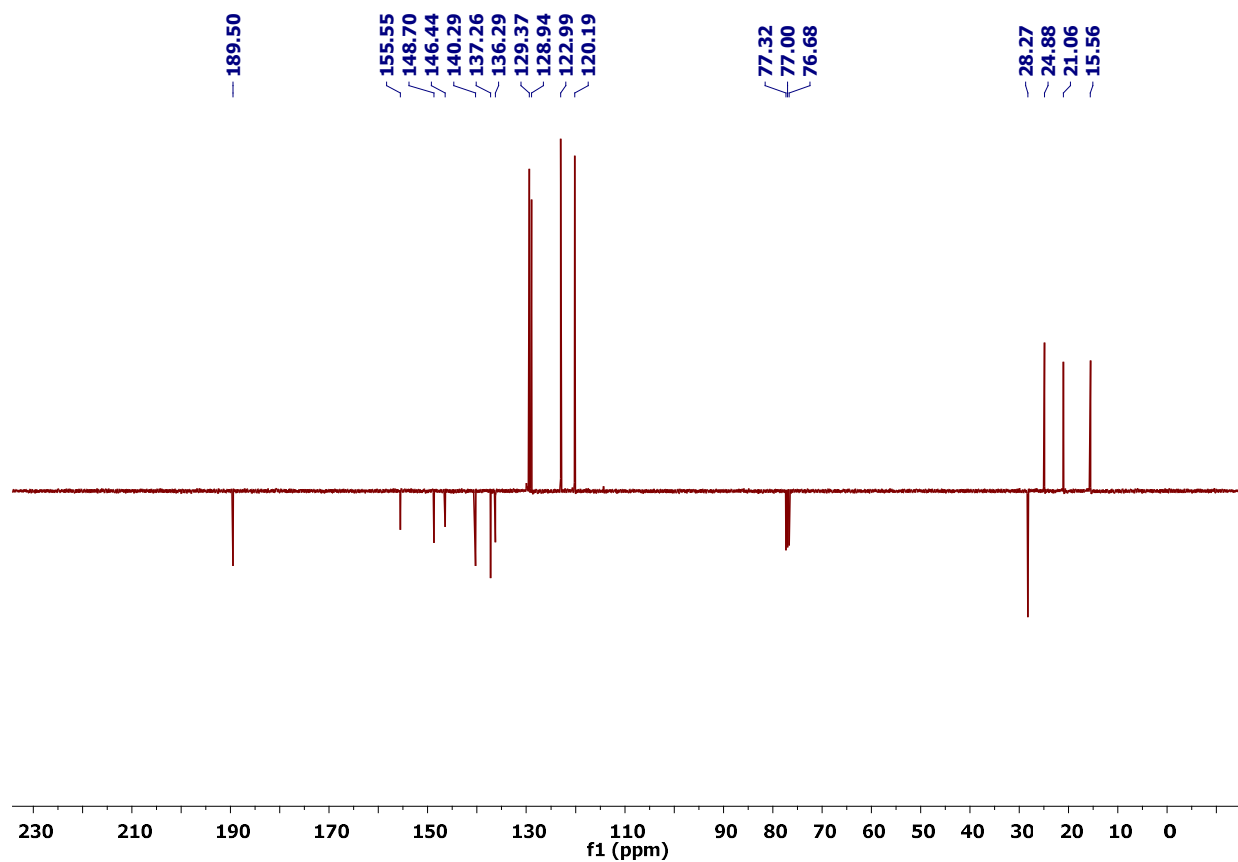

$^1\text{H}$ - $^1\text{H}$  gDQCOSY NMR ( $\text{CDCl}_3$ ) spectrum of (Z)-1-(5-((4-ethylphenyl)imino)-4-(p-tolyl)-4,5-dihydro-1,3,4-thiadiazol-2-yl)ethan-1-one

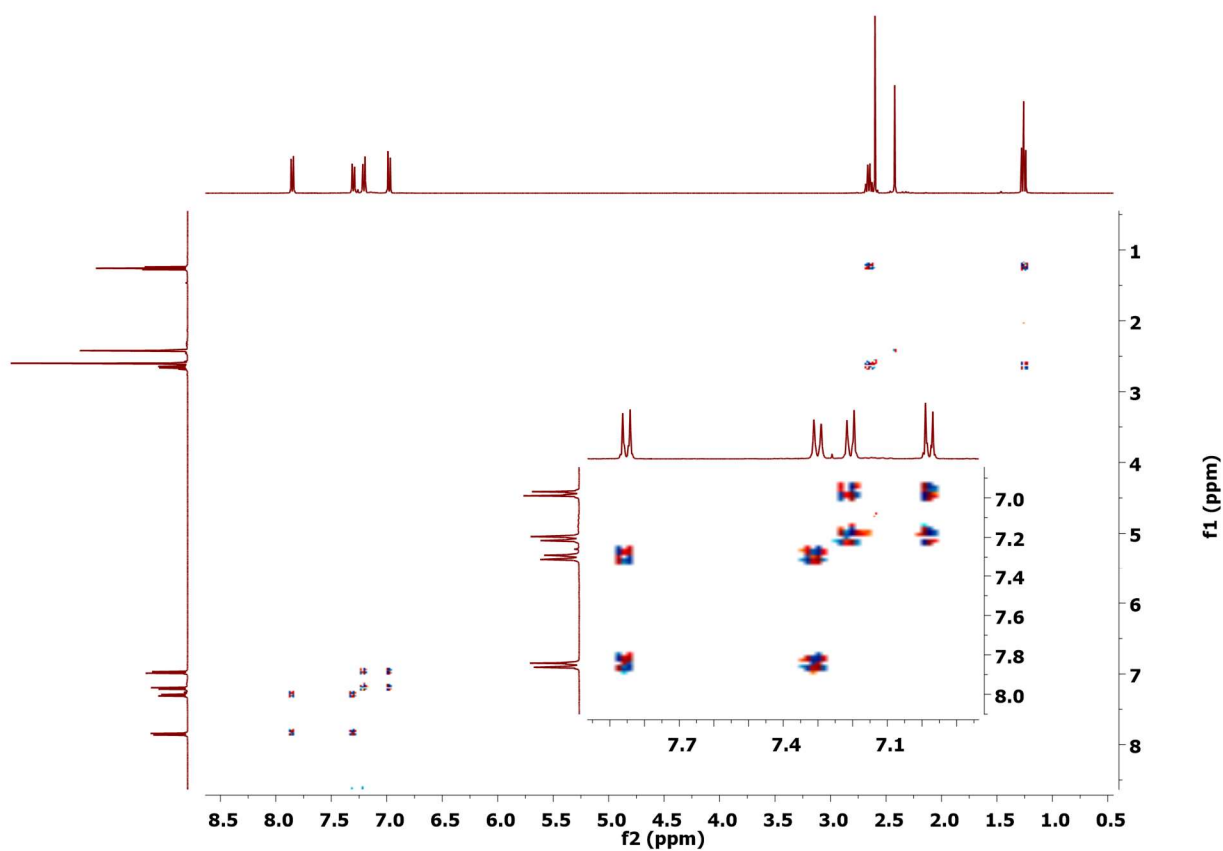

$^1\text{H}$ - $^{13}\text{C}$ -HSQC NMR ( $\text{CDCl}_3$ ) spectrum of (Z)-1-(5-((4-ethylphenyl)imino)-4-(p-tolyl)-4,5-dihydro-1,3,4-thiadiazol-2-yl)ethan-1-one

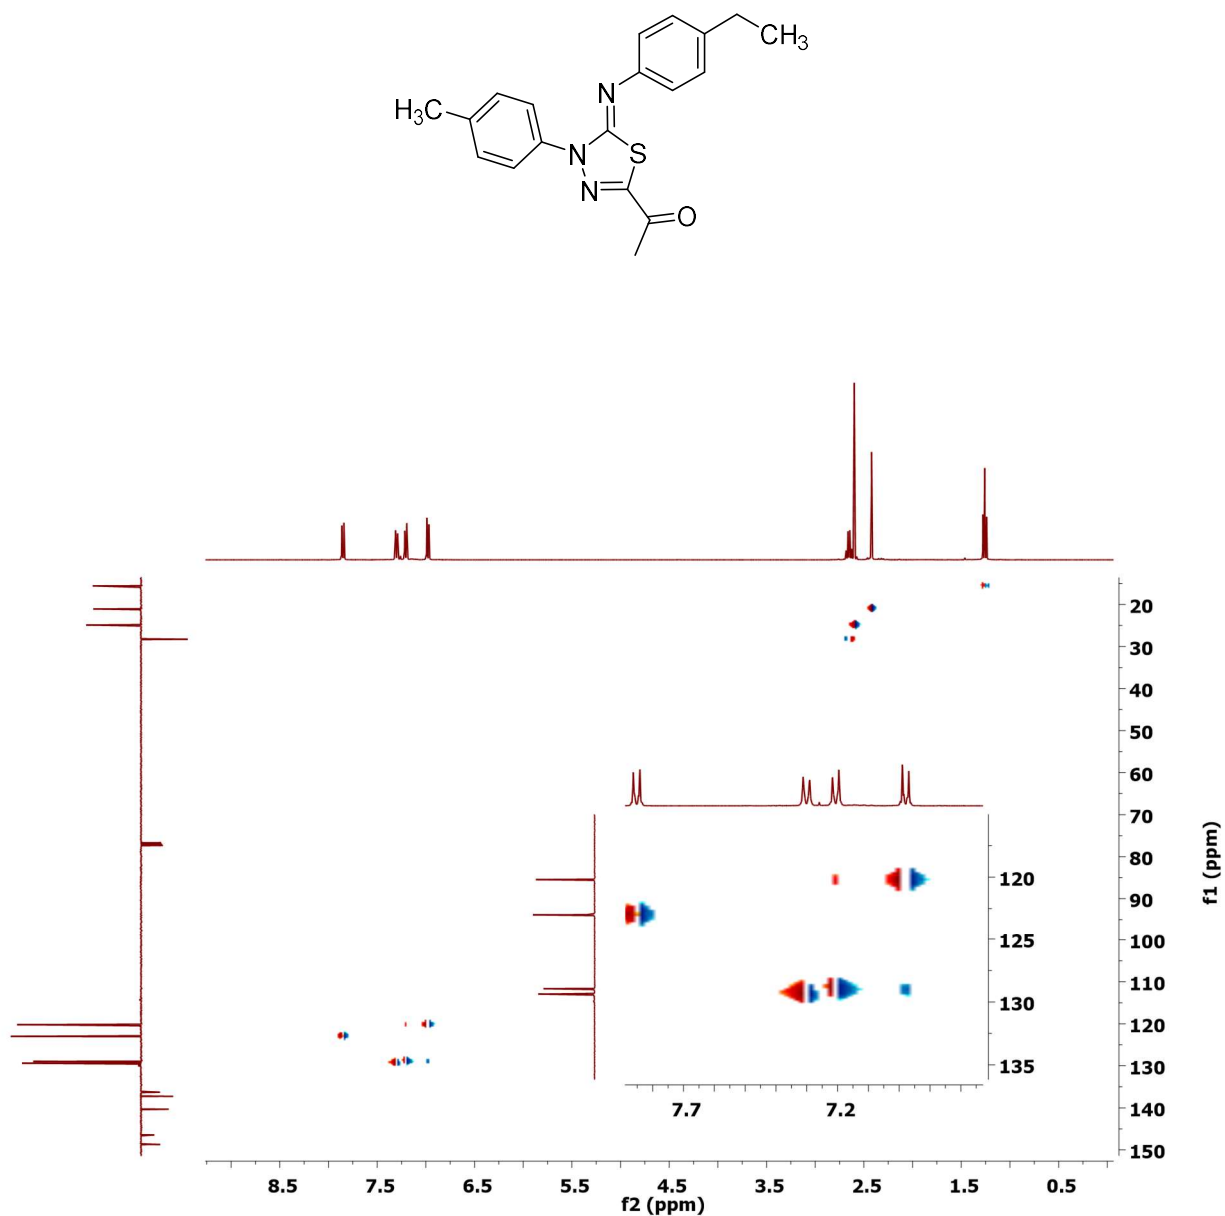

$^1\text{H}$ - $^{13}\text{C}$ -gHMBC NMR ( $\text{CDCl}_3$ ) spectrum of (Z)-1-(5-((4-ethylphenyl)imino)-4-(p-tolyl)-4,5-dihydro-1,3,4-thiadiazol-2-yl)ethan-1-one

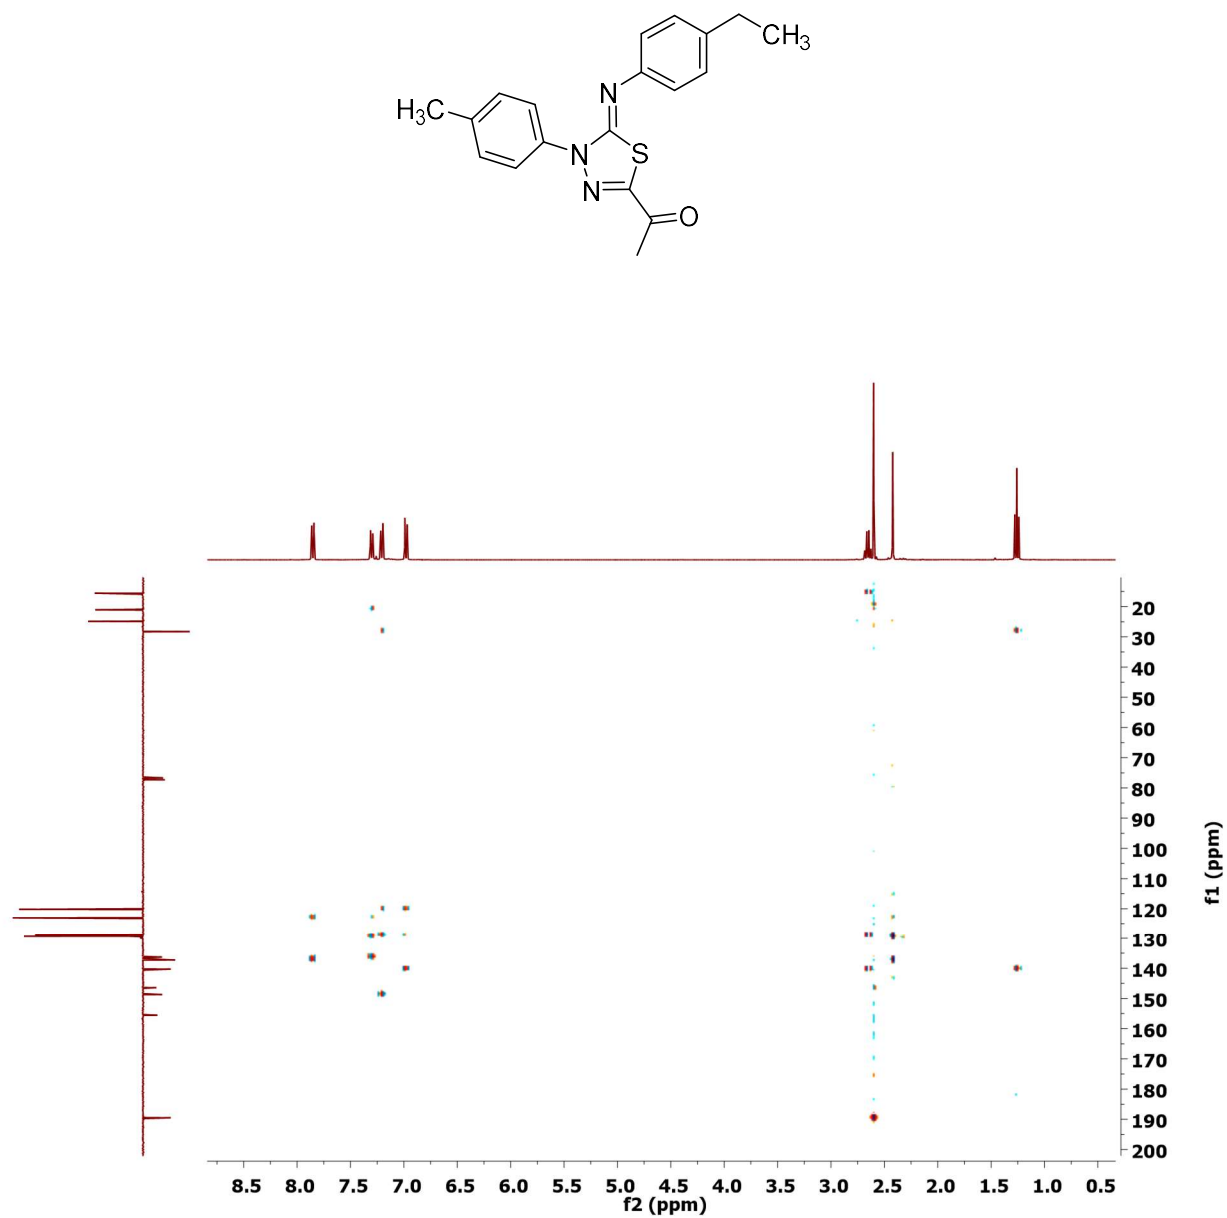

$^1\text{H}$  NMR ( $\text{CDCl}_3$ ) spectrum of (Z)-1-(4-(naphthalen-1-yl)-5-(naphthalen-1-ylimino)-4,5-dihydro-1,3,4-thiadiazol-2-yl)ethan-1-one

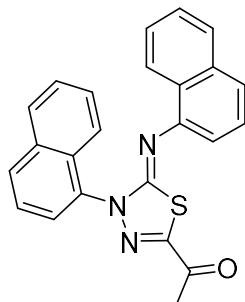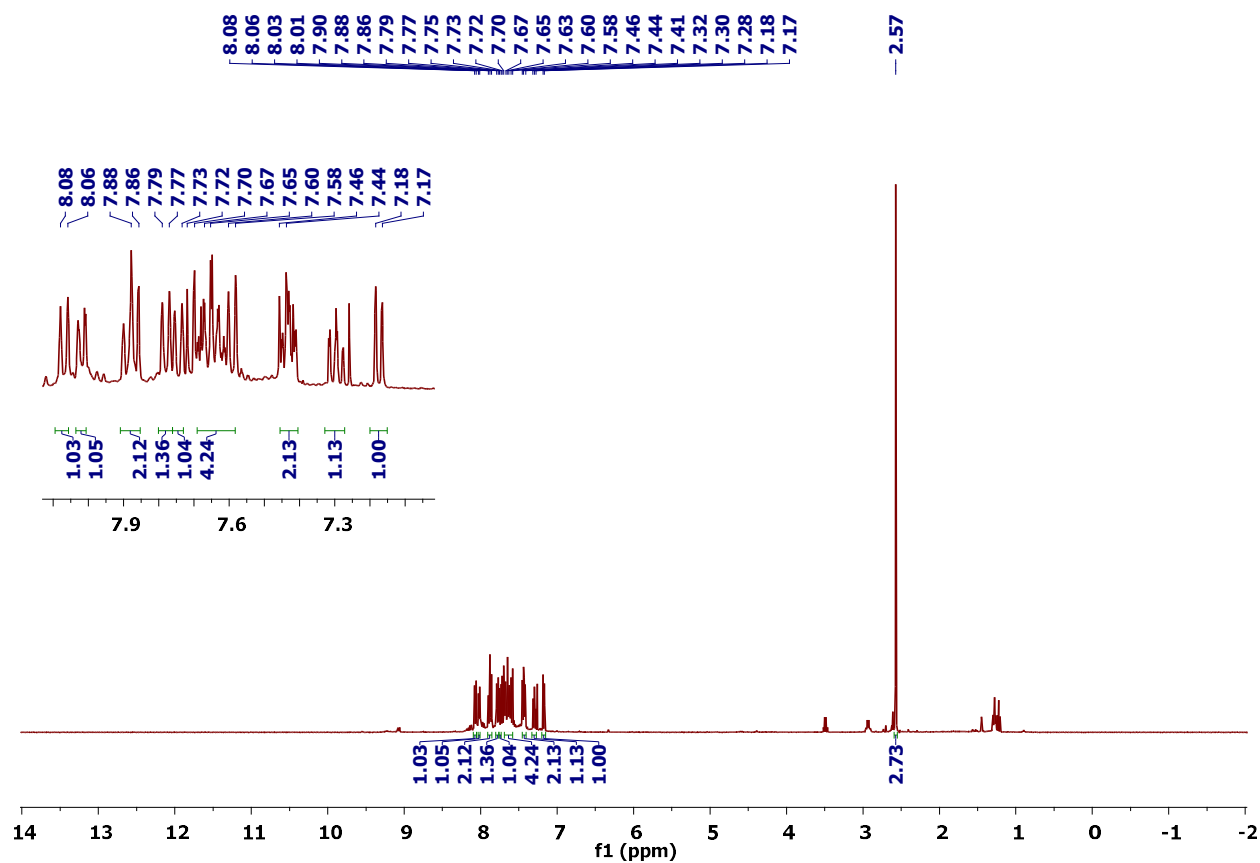



$^{13}\text{C}$  NMR ( $\text{CDCl}_3$ ) spectrum of (Z)-1-(4-(naphthalen-1-yl)-5-(naphthalen-1-ylimino)-4,5-dihydro-1,3,4-thiadiazol-2-yl)ethan-1-one

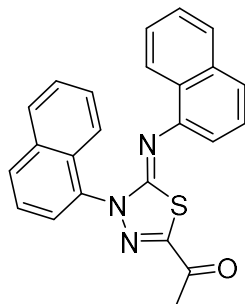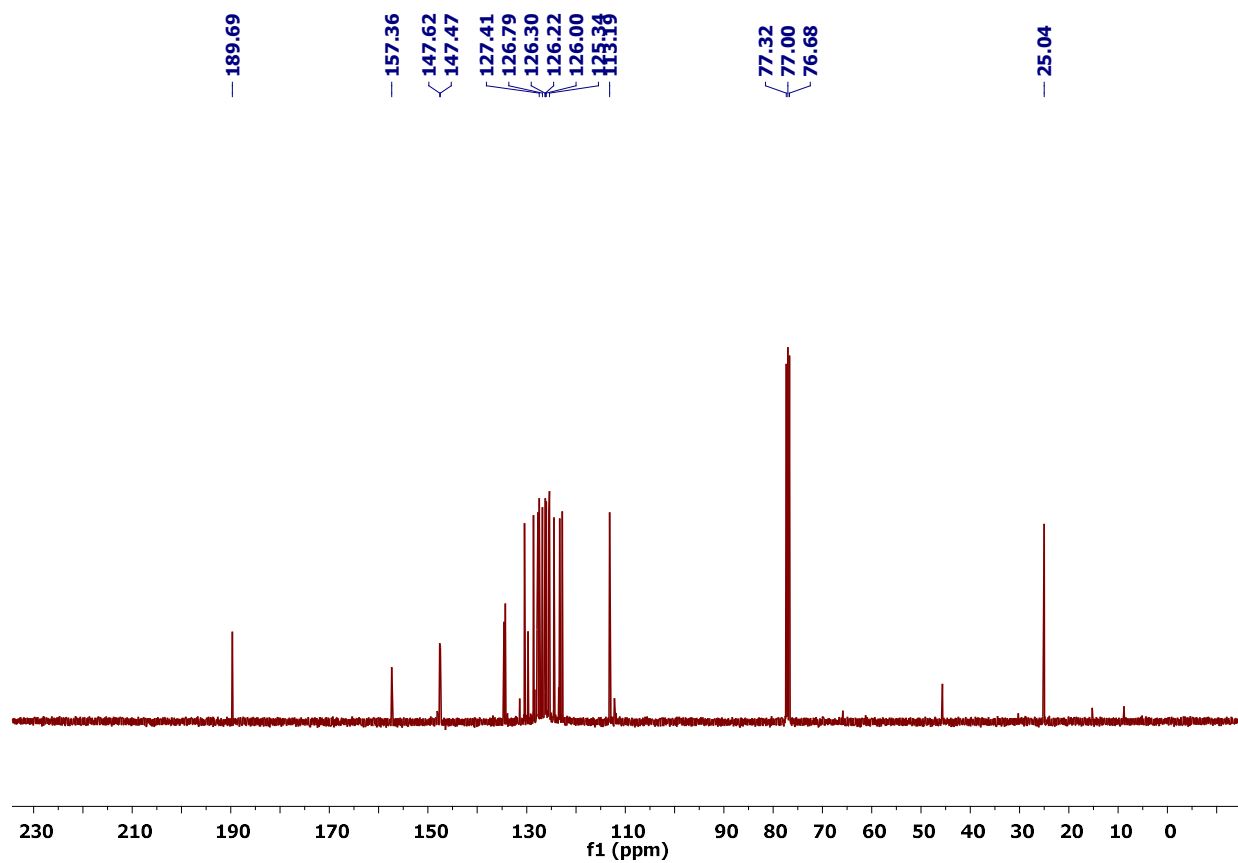

$^{13}\text{C}$  CRAPT NMR ( $\text{CDCl}_3$ ) spectrum of (Z)-1-(4-(naphthalen-1-yl)-5-(naphthalen-1-ylimino)-4,5-dihydro-1,3,4-thiadiazol-2-yl)ethan-1-one

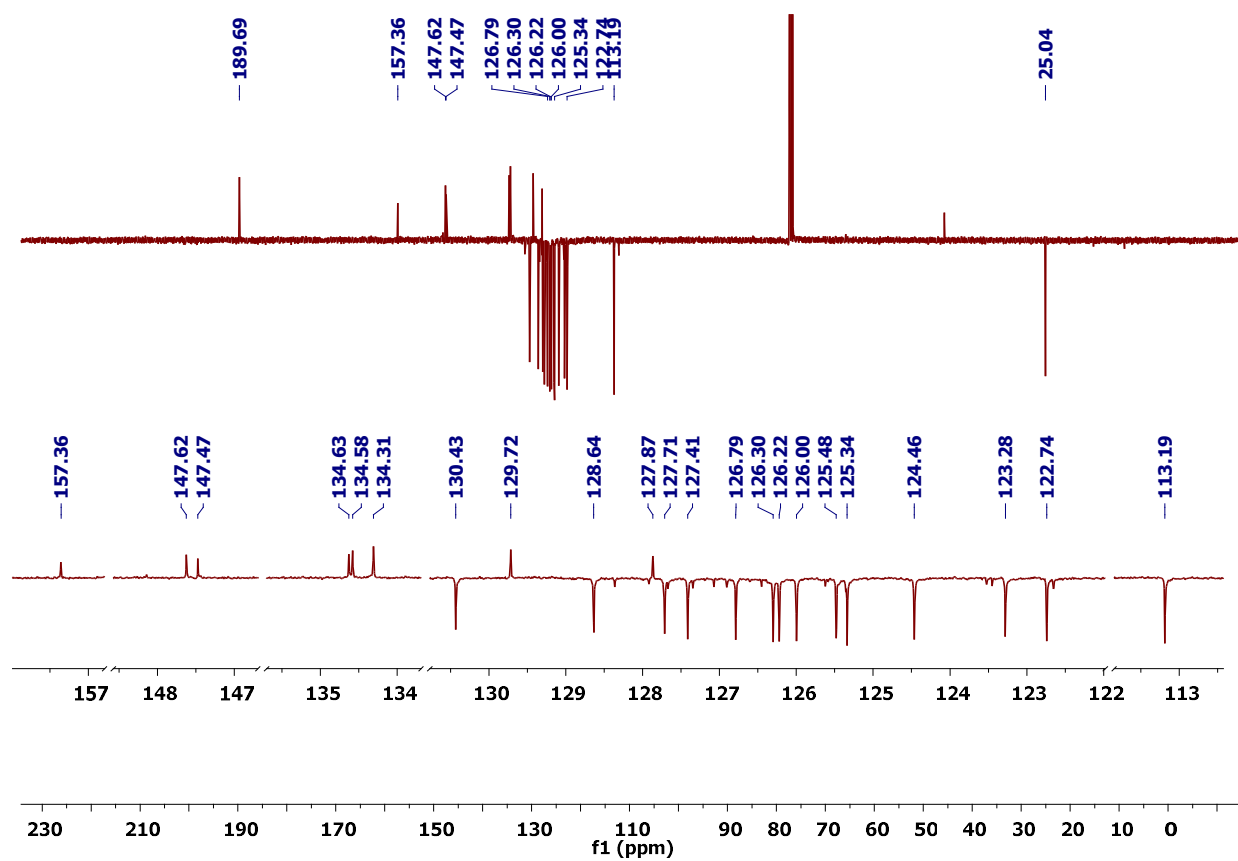

$^1\text{H}$ - $^1\text{H}$  gDQCOSY NMR ( $\text{CDCl}_3$ ) spectrum of (Z)-1-(4-(naphthalen-1-yl)-5-(naphthalen-1-ylimino)-4,5-dihydro-1,3,4-thiadiazol-2-yl)ethan-1-one

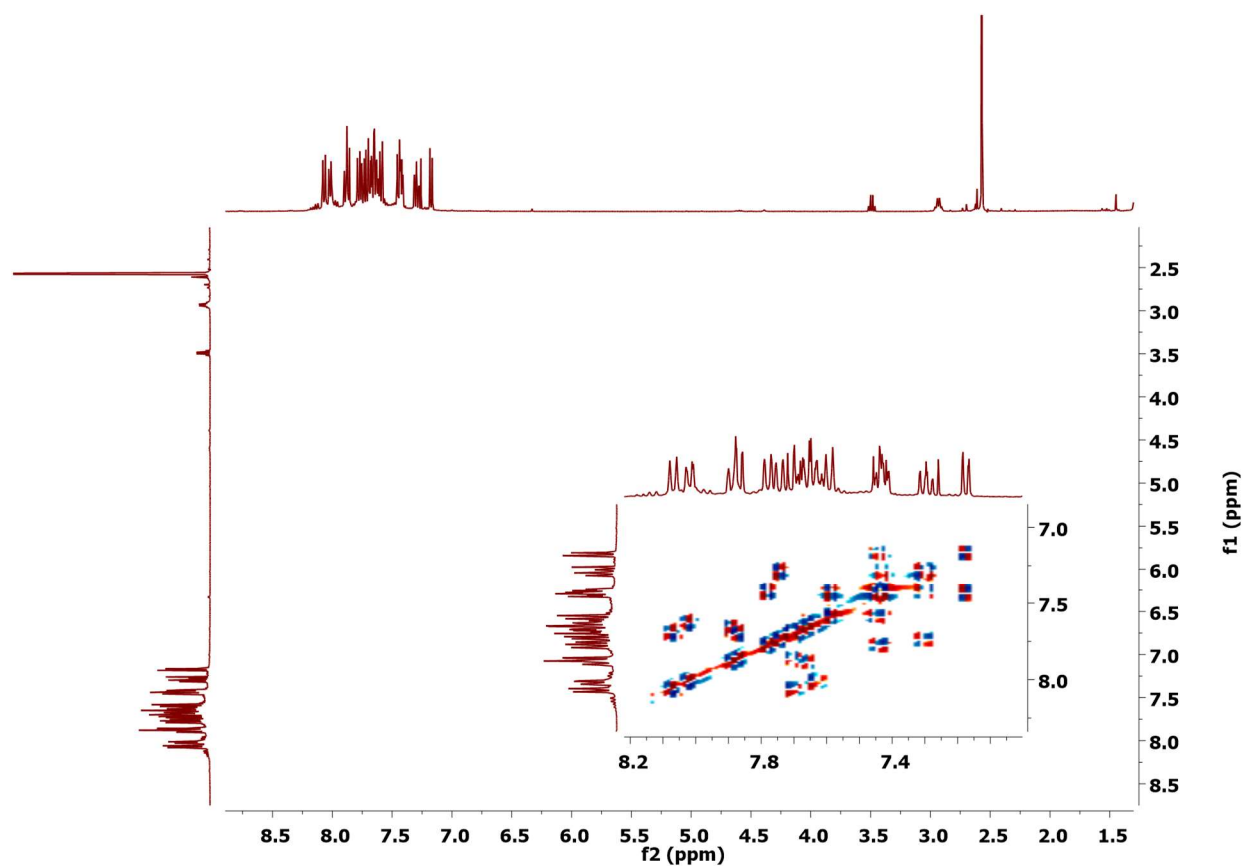

$^1\text{H}$ - $^{13}\text{C}$ -HSQC NMR ( $\text{CDCl}_3$ ) spectrum of (Z)-1-(4-(naphthalen-1-yl)-5-(naphthalen-1-ylimino)-4,5-dihydro-1,3,4-thiadiazol-2-yl)ethan-1-one

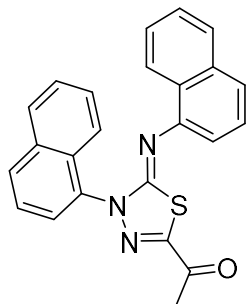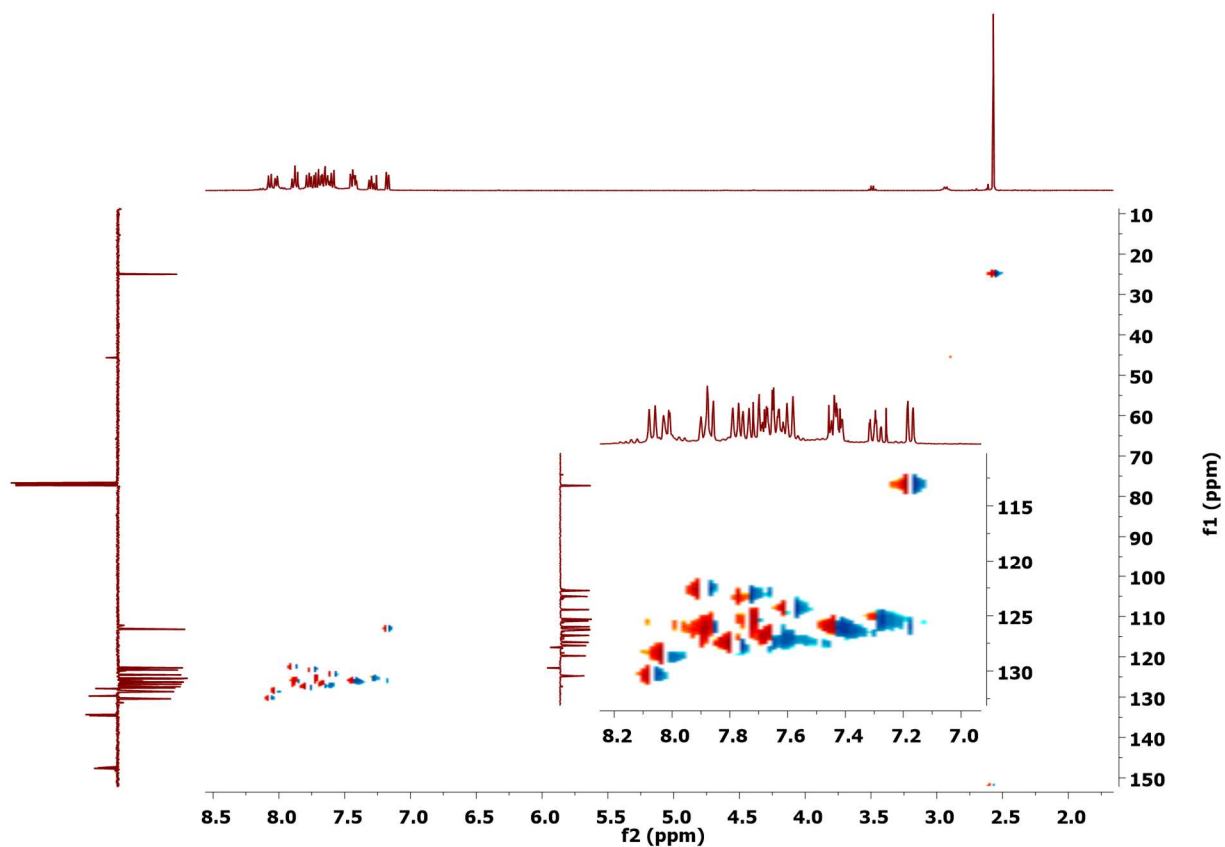

$^1\text{H}$ - $^{13}\text{C}$ -gHMBC NMR ( $\text{CDCl}_3$ ) spectrum of (Z)-1-(4-(naphthalen-1-yl)-5-(naphthalen-1-ylimino)-4,5-dihydro-1,3,4-thiadiazol-2-yl)ethan-1-one

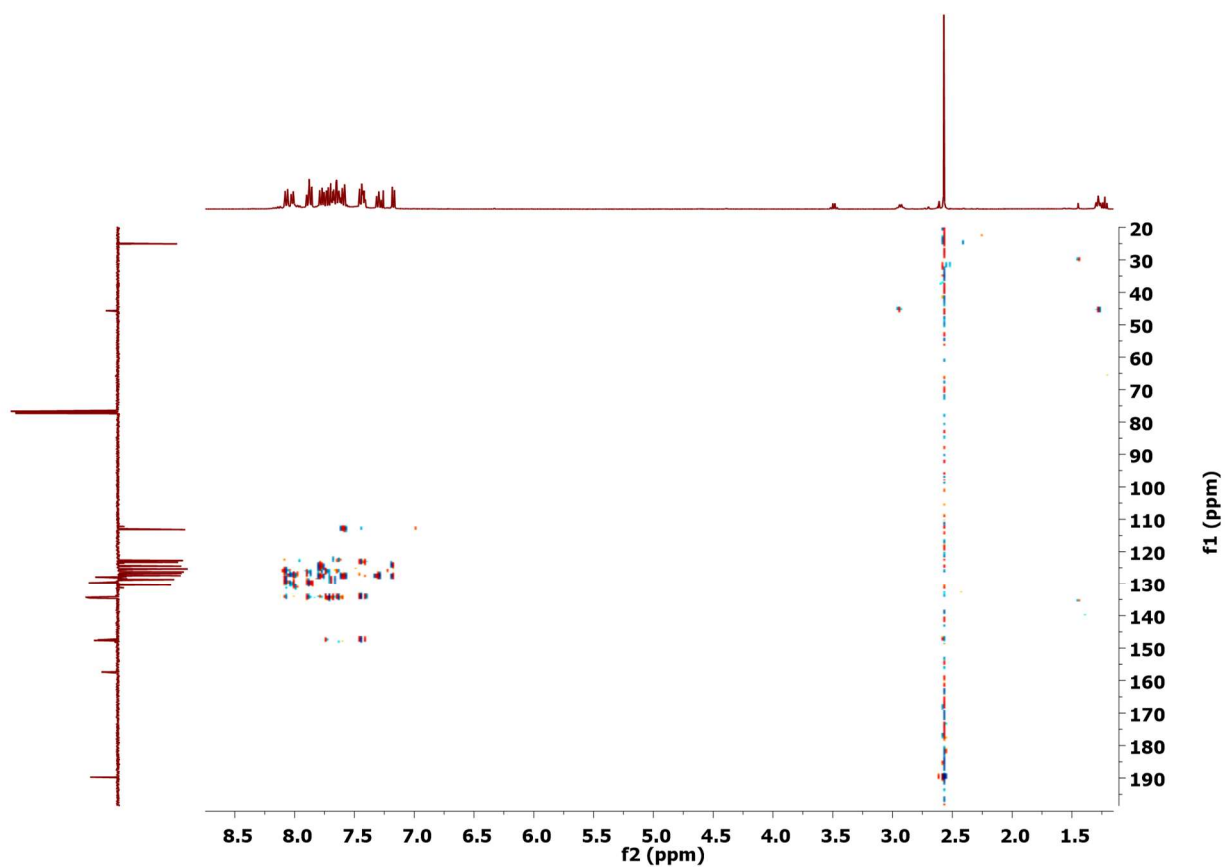

$^1\text{H}$  NMR ( $\text{CDCl}_3$ ) spectrum of (Z)-1-(4-(3,5-bis(trifluoromethyl)phenyl)-5-((4-nitrophenyl)imino)-4,5-dihydro-1,3,4-thiadiazol-2-yl)ethan-1-one

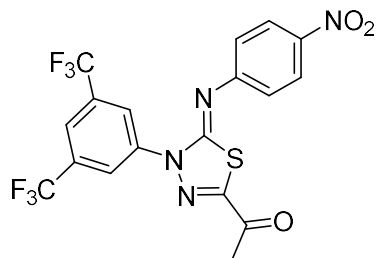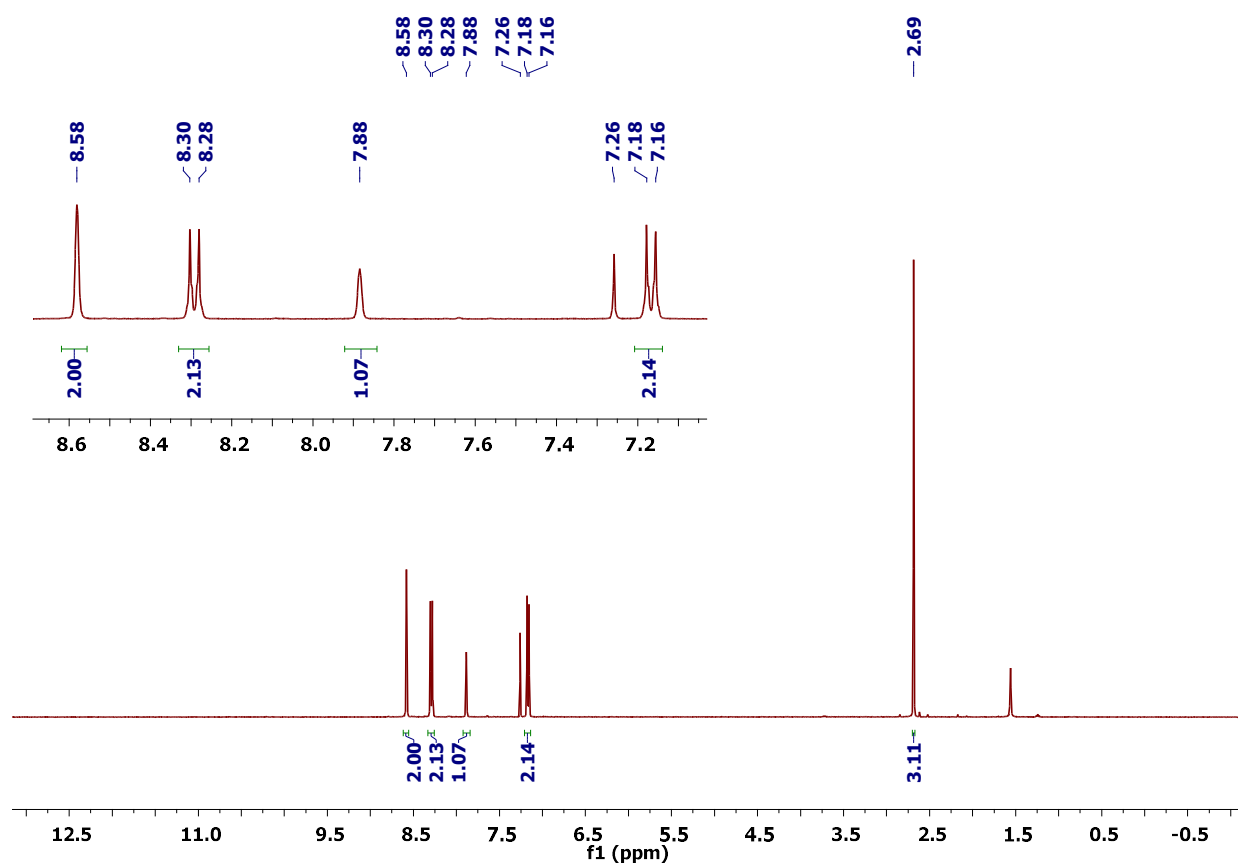

$^{13}\text{C}$  NMR ( $\text{CDCl}_3$ ) spectrum of (Z)-1-(4-(3,5-bis(trifluoromethyl)phenyl)-5-((4-nitrophenyl)imino)-4,5-dihydro-1,3,4-thiadiazol-2-yl)ethan-1-one

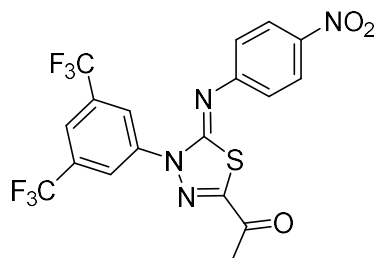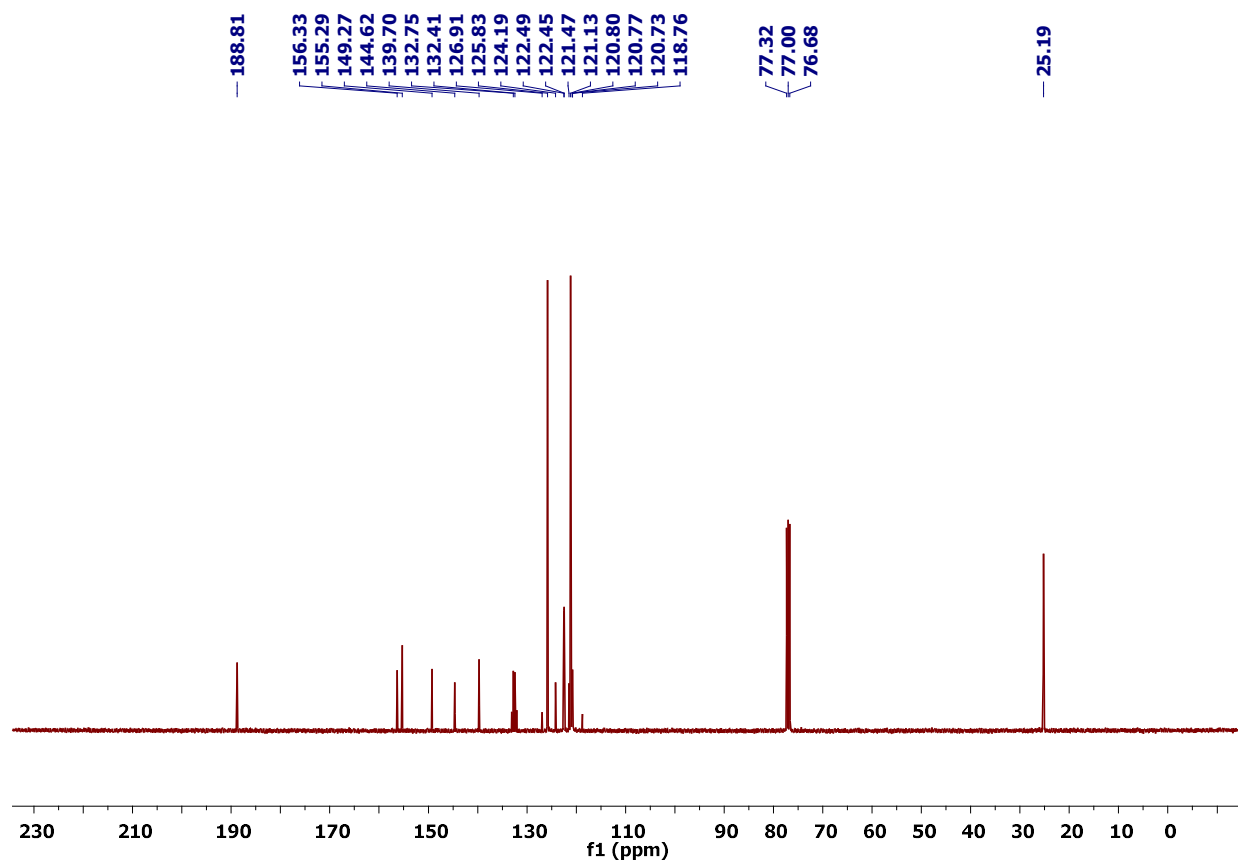

$^{13}\text{C}$  CRAPT NMR ( $\text{CDCl}_3$ ) spectrum of (Z)-1-(4-(3,5-bis(trifluoromethyl)phenyl)-5-((4-nitrophenyl)imino)-4,5-dihydro-1,3,4-thiadiazol-2-yl)ethan-1-one

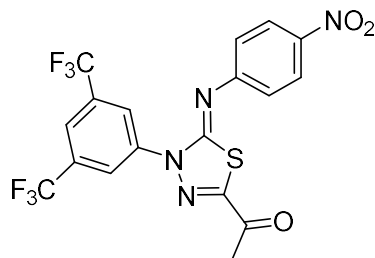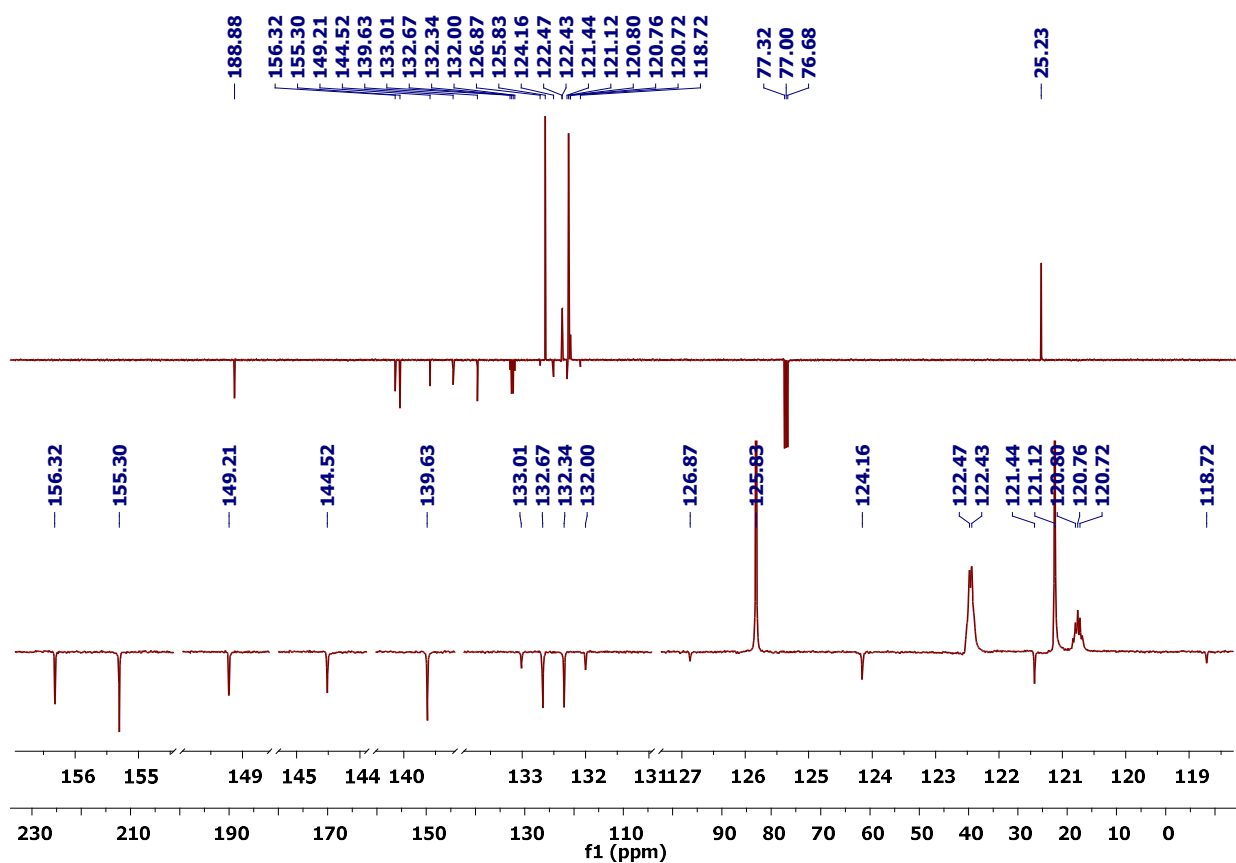



$^1\text{H}$ - $^1\text{H}$  gDQCOSY NMR ( $\text{CDCl}_3$ ) spectrum of (Z)-1-(4-(3,5-bis(trifluoromethyl)phenyl)-5-((4-nitrophenyl)imino)-4,5-dihydro-1,3,4-thiadiazol-2-yl)ethan-1-one

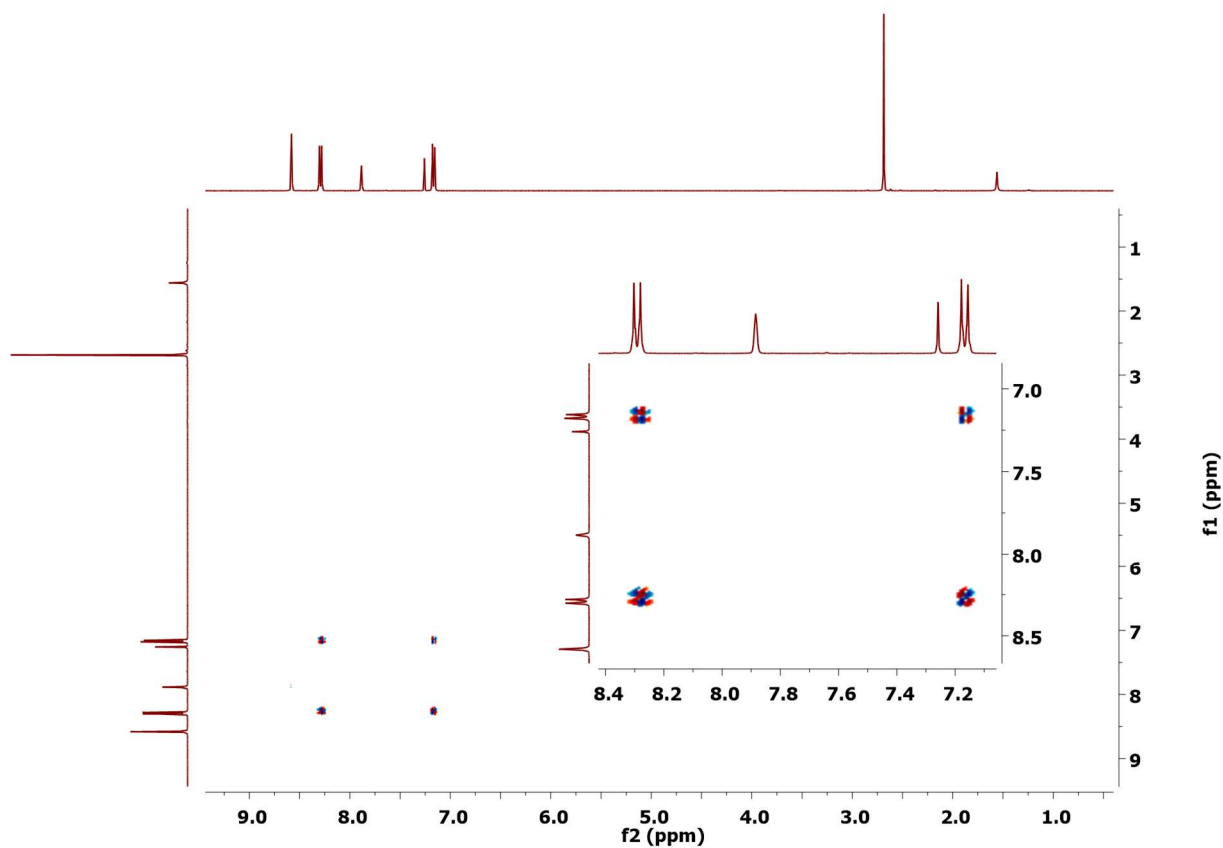

$^1\text{H}$ - $^{13}\text{C}$ -HSQC NMR ( $\text{CDCl}_3$ ) spectrum of (Z)-1-(4-(3,5-bis(trifluoromethyl)phenyl)-5-((4-nitrophenyl)imino)-4,5-dihydro-1,3,4-thiadiazol-2-yl)ethan-1-one

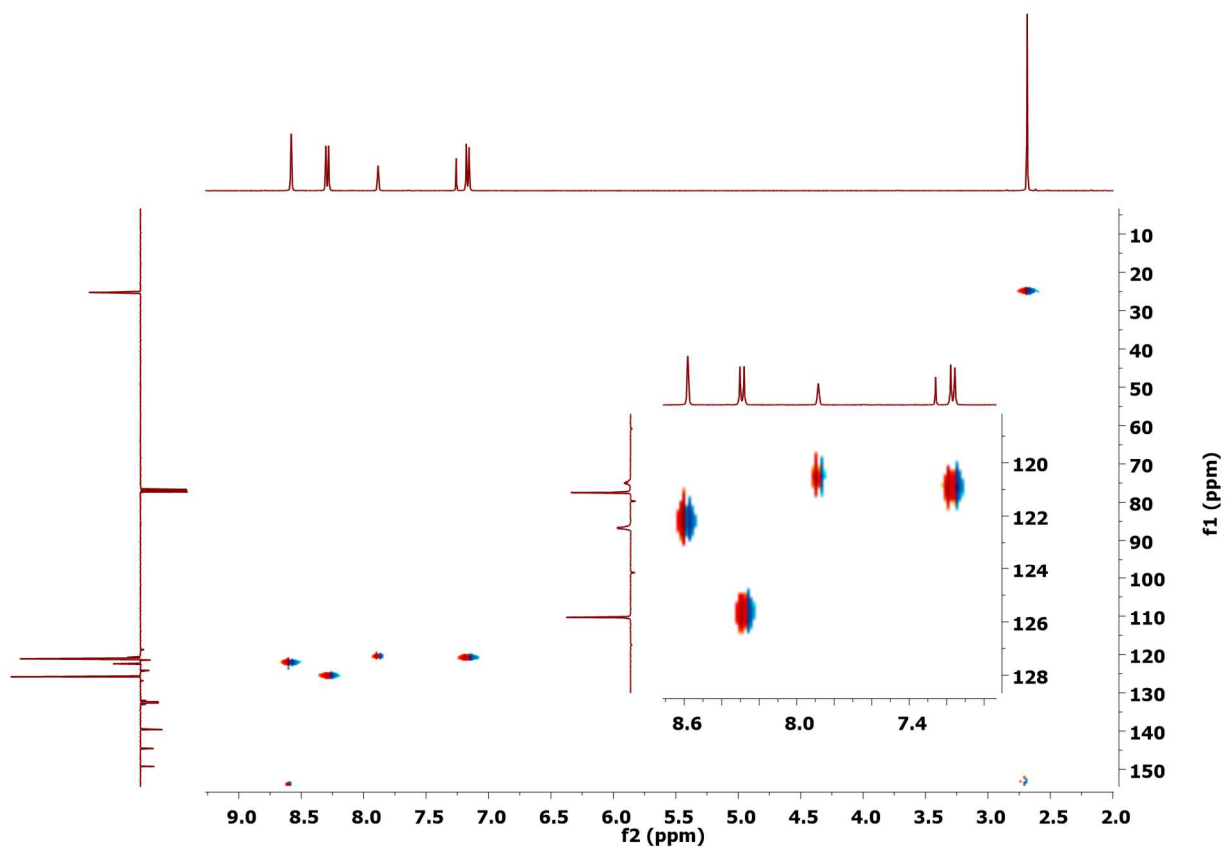

$^1\text{H}$ - $^{13}\text{C}$ -gHMBC NMR ( $\text{CDCl}_3$ ) spectrum of (Z)-1-(4-(3,5-bis(trifluoromethyl)phenyl)-5-((4-nitrophenyl)imino)-4,5-dihydro-1,3,4-thiadiazol-2-yl)ethan-1-one

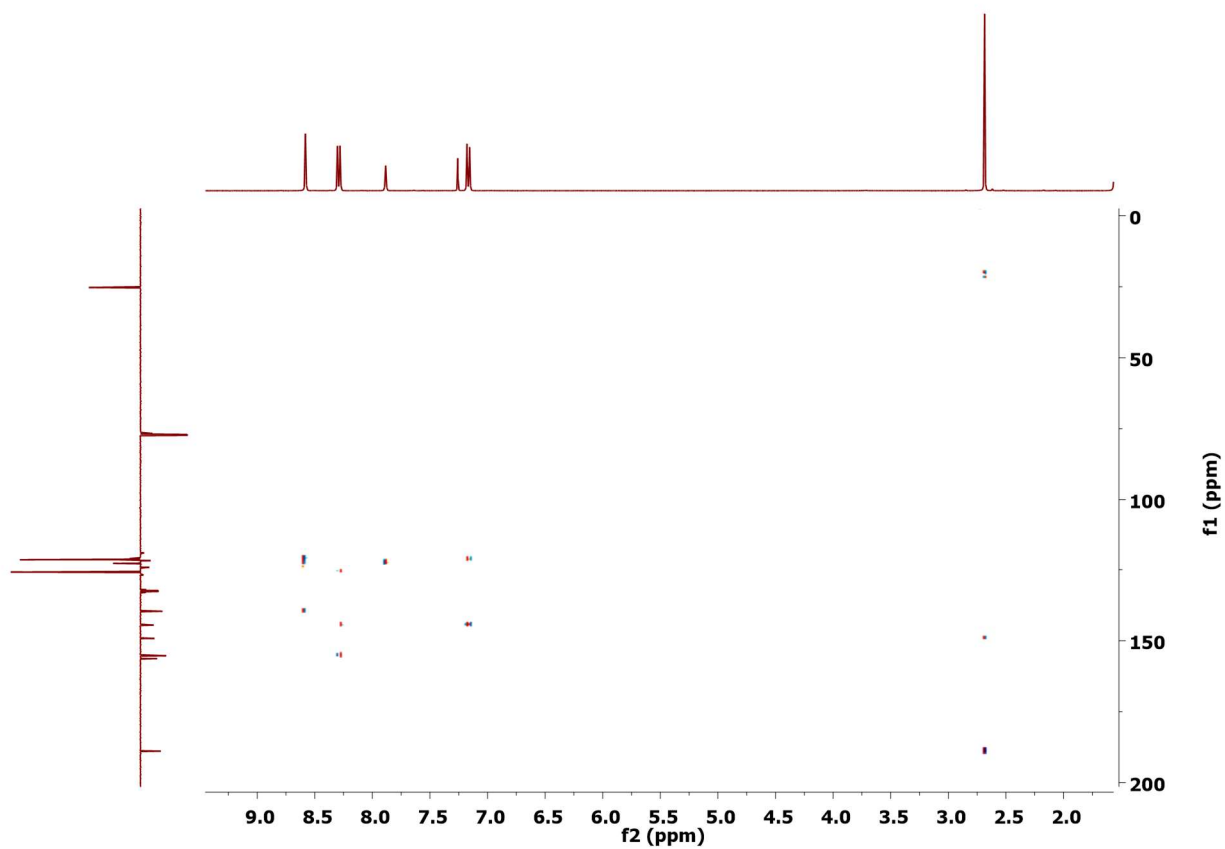

$^1\text{H}$  NMR ( $\text{CDCl}_3$ ) spectrum of (Z)-1-(4-(3,5-bis(trifluoromethyl)phenyl)-5-((4-methoxyphenyl)imino)-4,5-dihydro-1,3,4-thiadiazol-2-yl)ethan-1-one

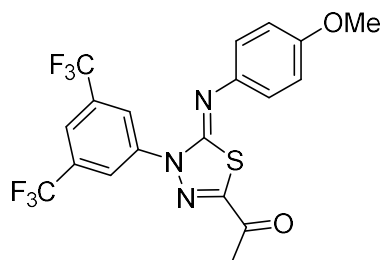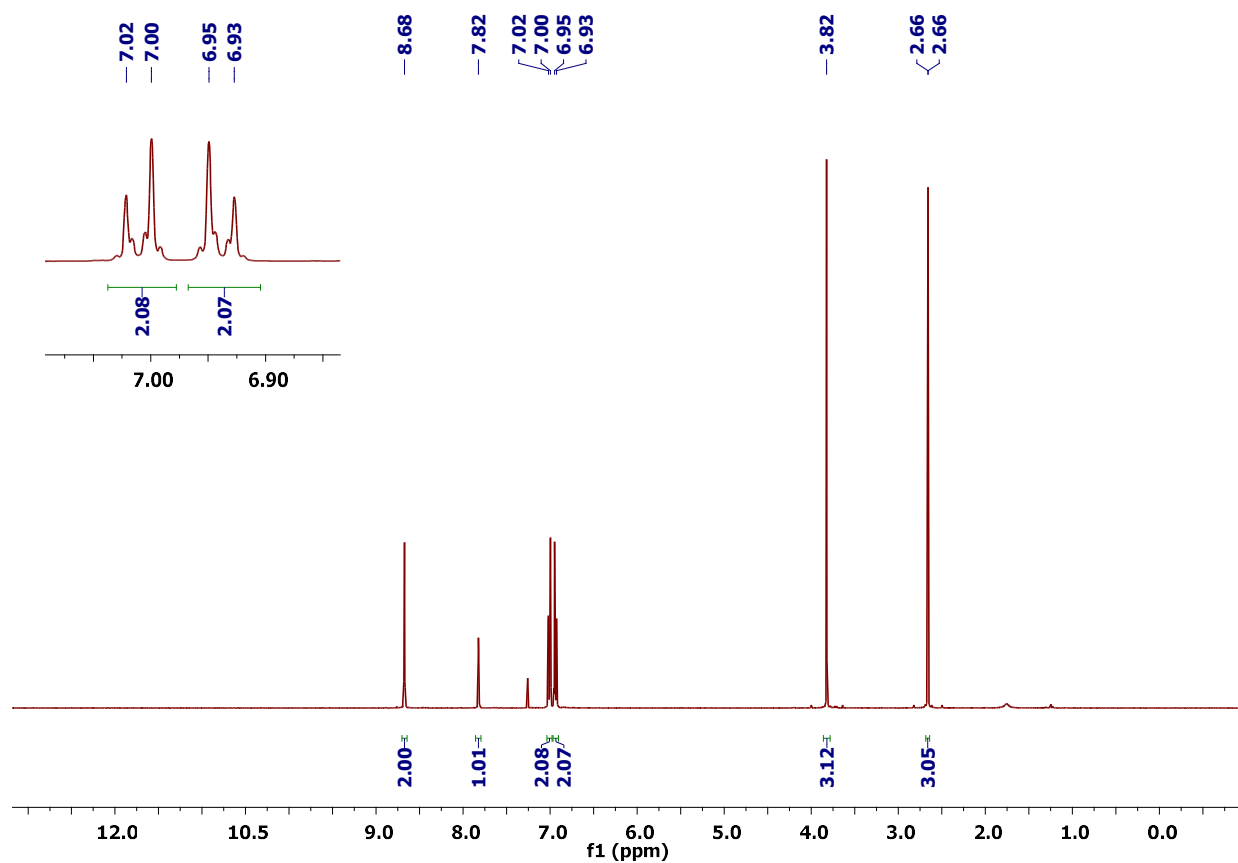

$^{13}\text{C}$  NMR ( $\text{CDCl}_3$ ) spectrum of (Z)-1-(4-(3,5-bis(trifluoromethyl)phenyl)-5-((4-methoxyphenyl)imino)-4,5-dihydro-1,3,4-thiadiazol-2-yl)ethan-1-one

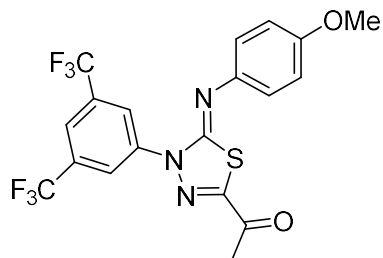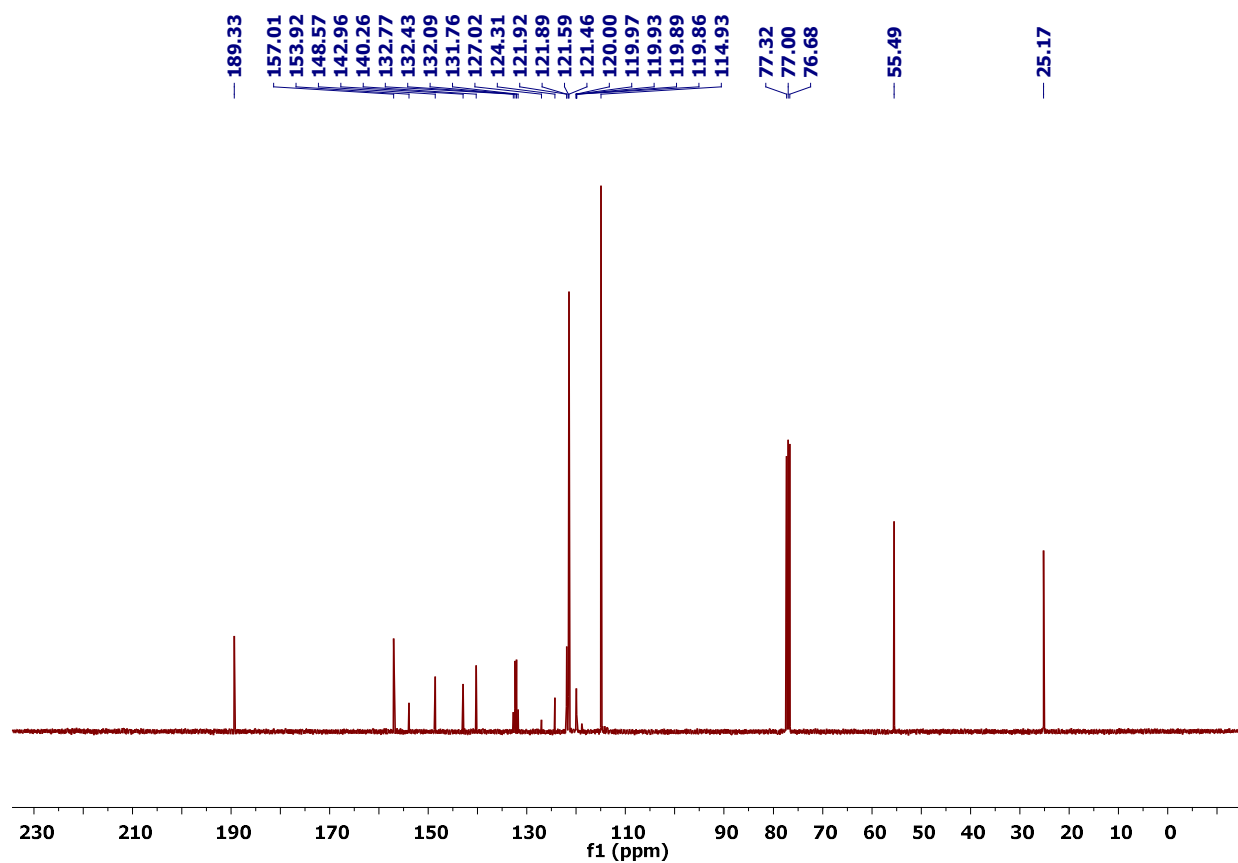

$^{13}\text{C}$  CRAPT NMR ( $\text{CDCl}_3$ ) spectrum of (Z)-1-(4-(3,5-bis(trifluoromethyl)phenyl)-5-((4-methoxyphenyl)imino)-4,5-dihydro-1,3,4-thiadiazol-2-yl)ethan-1-one

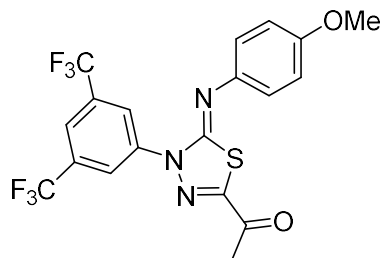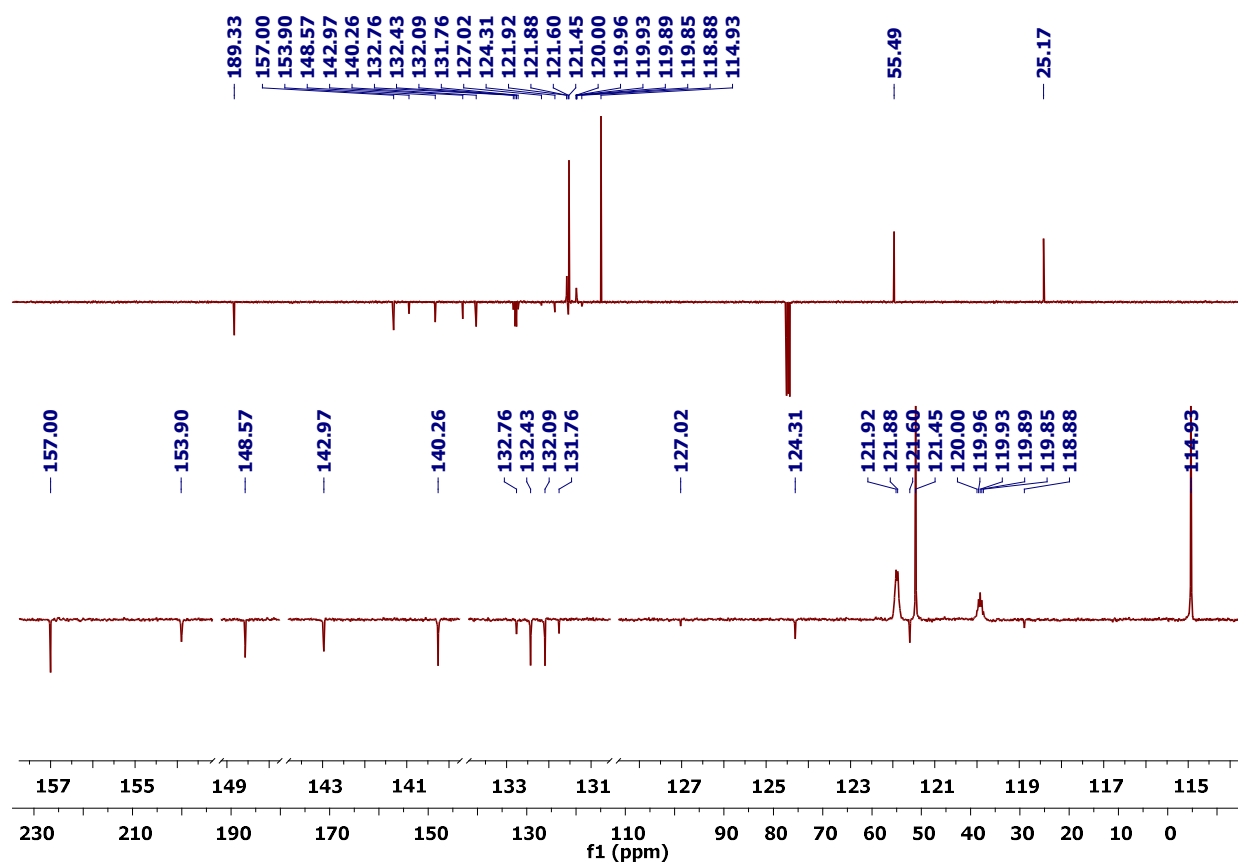

$^1\text{H}$ - $^1\text{H}$  gDQCOSY NMR ( $\text{CDCl}_3$ ) spectrum of (Z)-1-(4-(3,5-bis(trifluoromethyl)phenyl)-5-((4-methoxyphenyl)imino)-4,5-dihydro-1,3,4-thiadiazol-2-yl)ethan-1-one

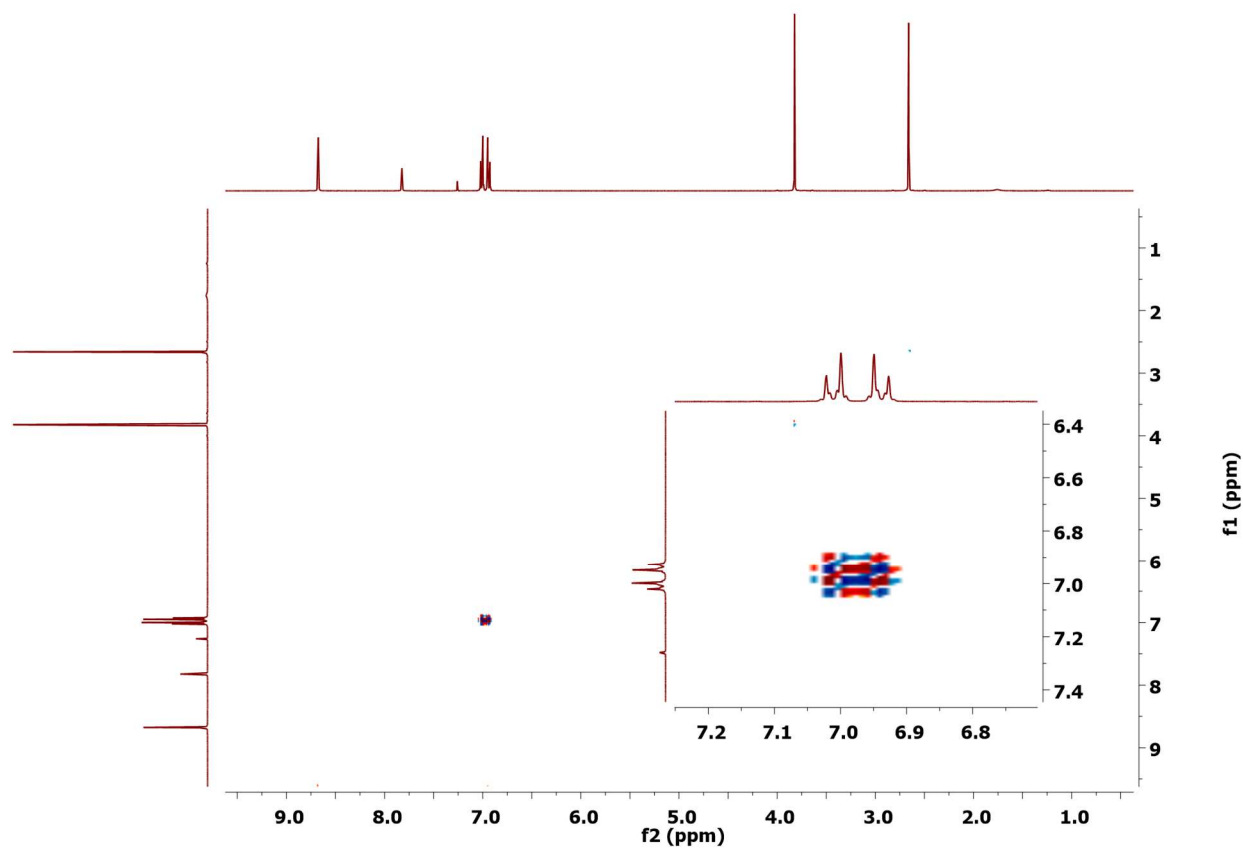

$^1\text{H}$ - $^{13}\text{C}$ -HSQC NMR ( $\text{CDCl}_3$ ) spectrum of (Z)-1-(4-(3,5-bis(trifluoromethyl)phenyl)-5-((4-methoxyphenyl)imino)-4,5-dihydro-1,3,4-thiadiazol-2-yl)ethan-1-one

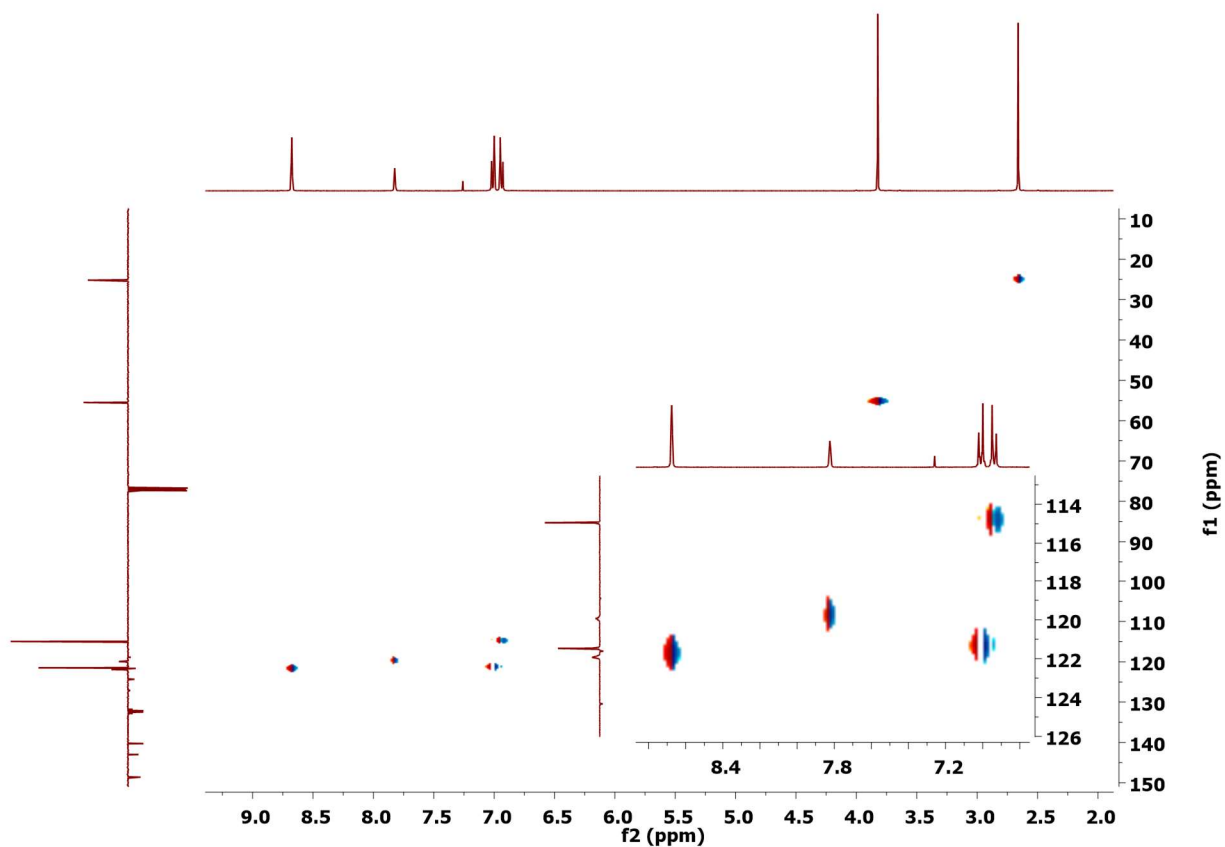



$^1\text{H}$ - $^{13}\text{C}$ -gHMBC NMR ( $\text{CDCl}_3$ ) spectrum of (Z)-1-(4-(3,5-bis(trifluoromethyl)phenyl)-5-((4-methoxyphenyl)imino)-4,5-dihydro-1,3,4-thiadiazol-2-yl)ethan-1-one

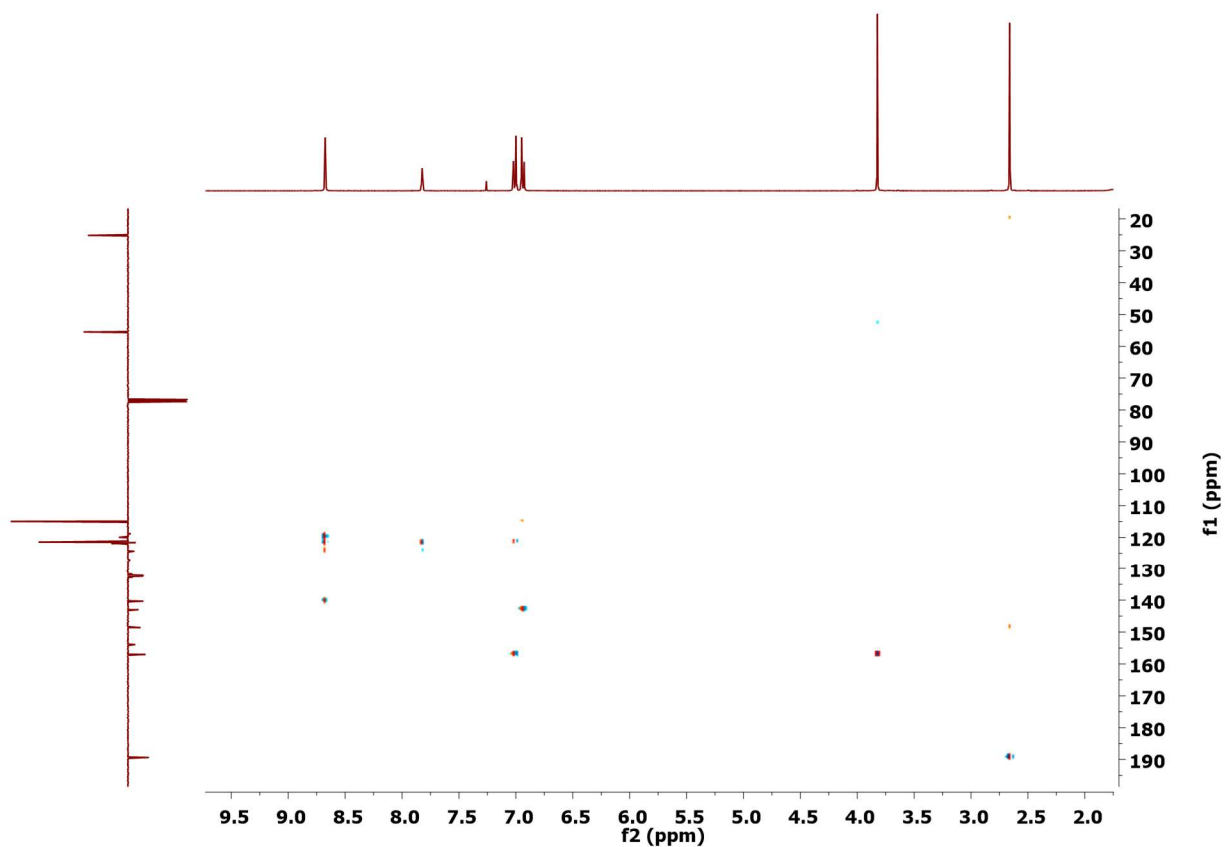

$^1\text{H}$  NMR ( $\text{CDCl}_3$ ) spectrum of (Z)-1-(4-(3,5-bis(trifluoromethyl)phenyl)-5-((4-bromophenyl)imino)-4,5-dihydro-1,3,4-thiadiazol-2-yl)ethan-1-one

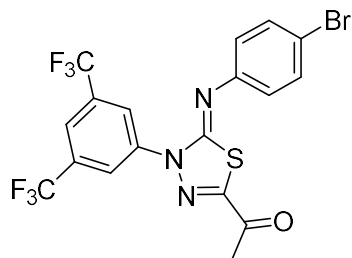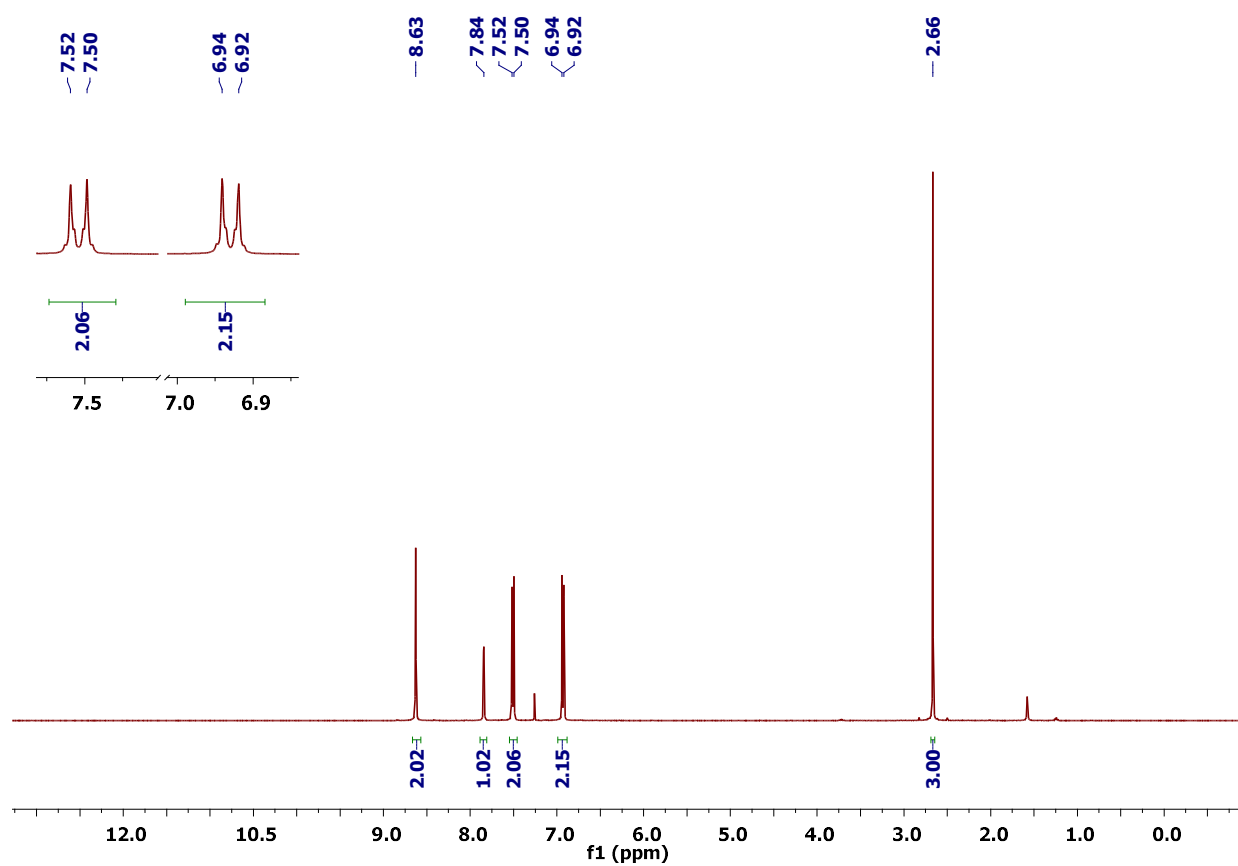

$^{13}\text{C}$  NMR ( $\text{CDCl}_3$ ) spectrum of (Z)-1-(4-(3,5-bis(trifluoromethyl)phenyl)-5-((4-bromophenyl)imino)-4,5-dihydro-1,3,4-thiadiazol-2-yl)ethan-1-one

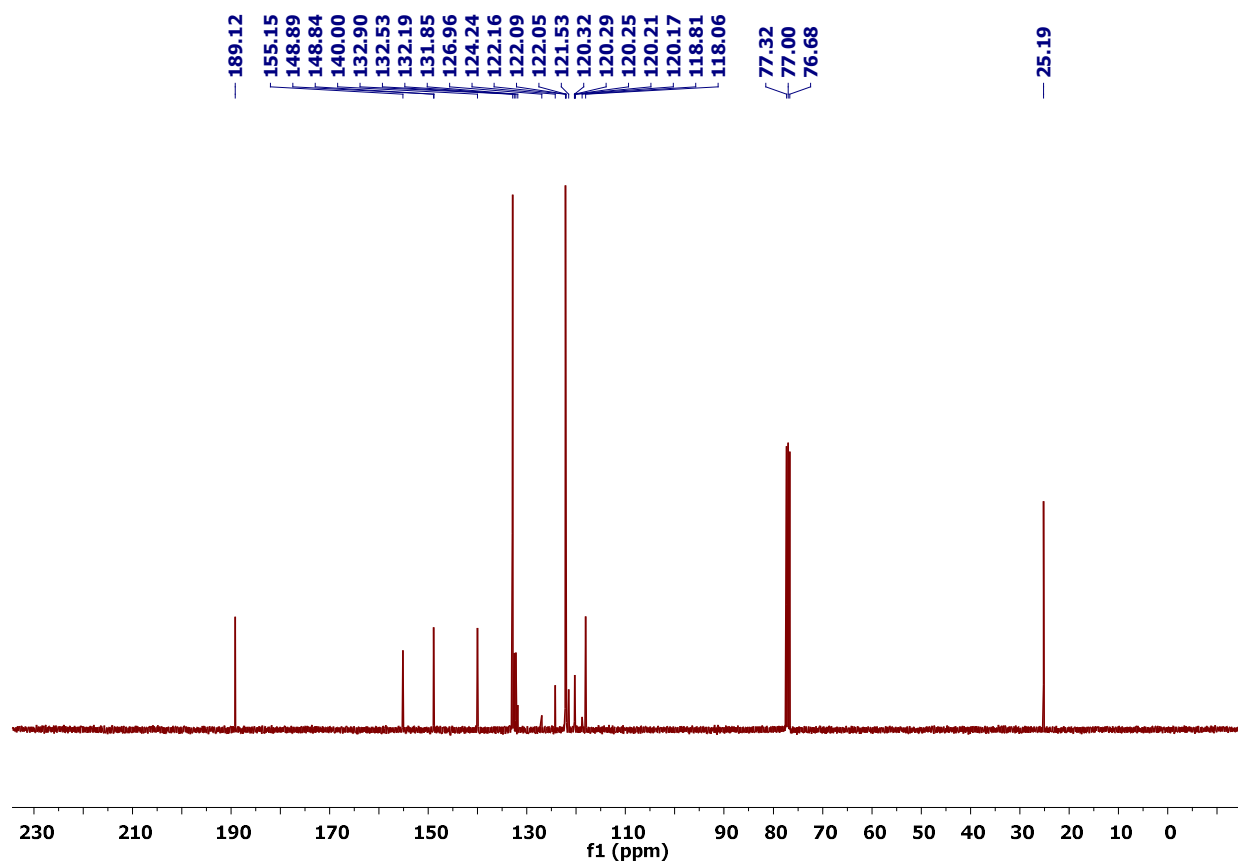

$^{13}\text{C}$  CRAPT NMR ( $\text{CDCl}_3$ ) spectrum of (Z)-1-(4-(3,5-bis(trifluoromethyl)phenyl)-5-((4-bromophenyl)imino)-4,5-dihydro-1,3,4-thiadiazol-2-yl)ethan-1-one

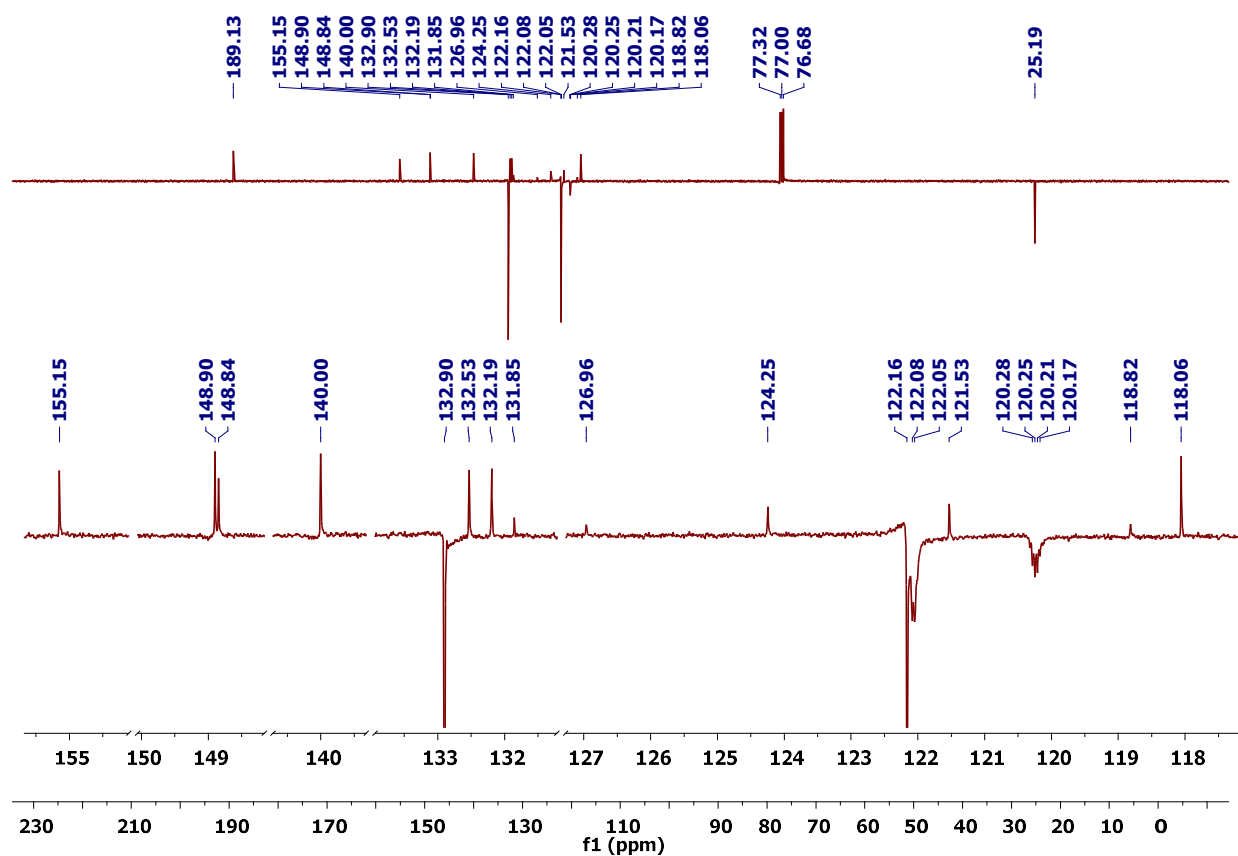

$^1\text{H}$ - $^1\text{H}$  gDQCOSY NMR ( $\text{CDCl}_3$ ) spectrum of (Z)-1-(4-(3,5-bis(trifluoromethyl)phenyl)-5-((4-bromophenyl)imino)-4,5-dihydro-1,3,4-thiadiazol-2-yl)ethan-1-one

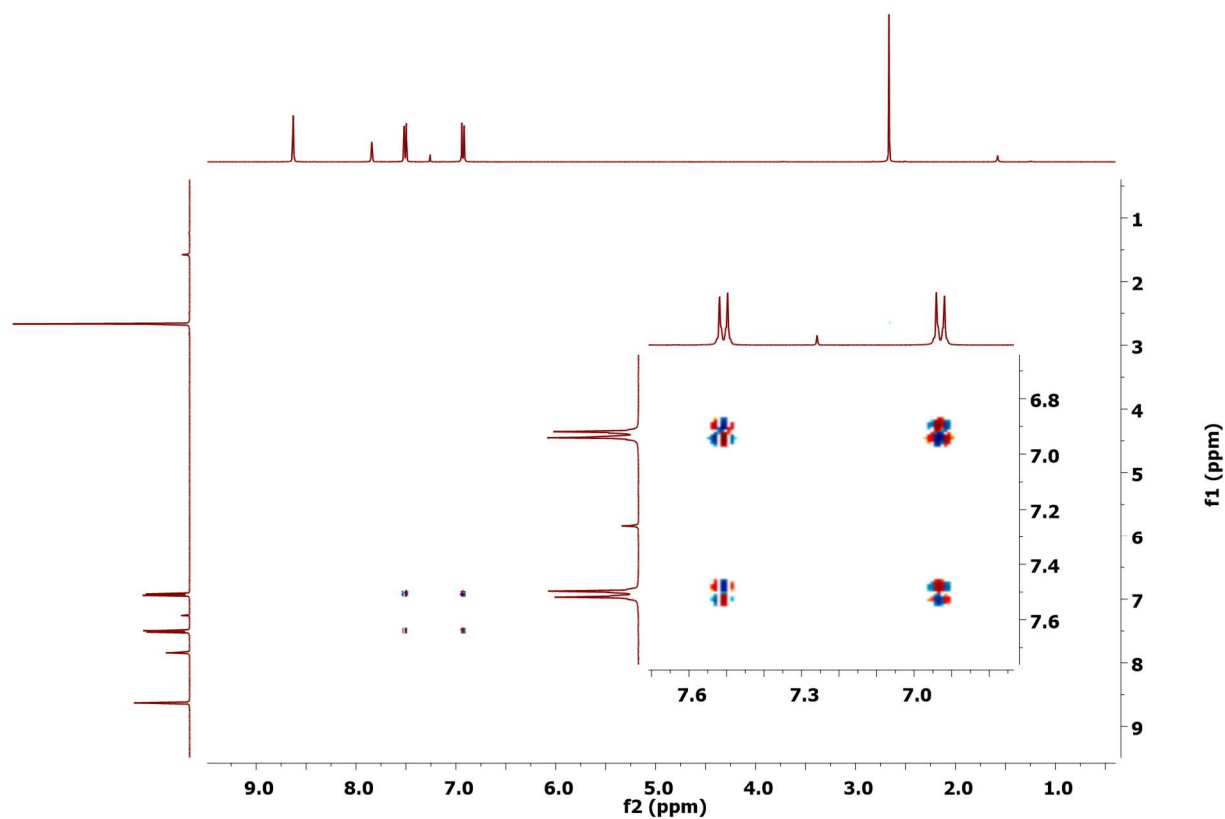

$^1\text{H}$ - $^{13}\text{C}$ -HSQC NMR ( $\text{CDCl}_3$ ) spectrum of (Z)-1-(4-(3,5-bis(trifluoromethyl)phenyl)-5-((4-bromophenyl)imino)-4,5-dihydro-1,3,4-thiadiazol-2-yl)ethan-1-one

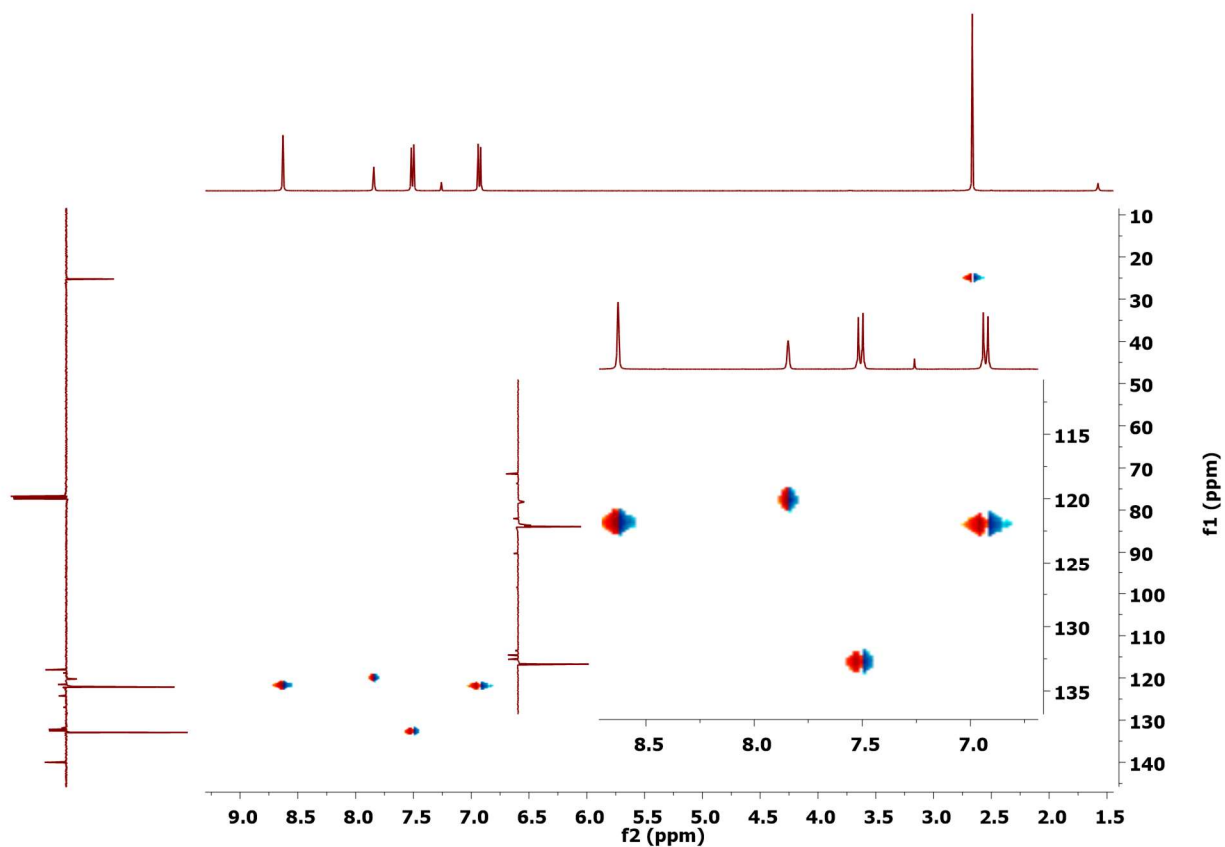

$^1\text{H}$ - $^{13}\text{C}$ -gHMBC NMR ( $\text{CDCl}_3$ ) spectrum of (Z)-1-(4-(3,5-bis(trifluoromethyl)phenyl)-5-((4-bromophenyl)imino)-4,5-dihydro-1,3,4-thiadiazol-2-yl)ethan-1-one

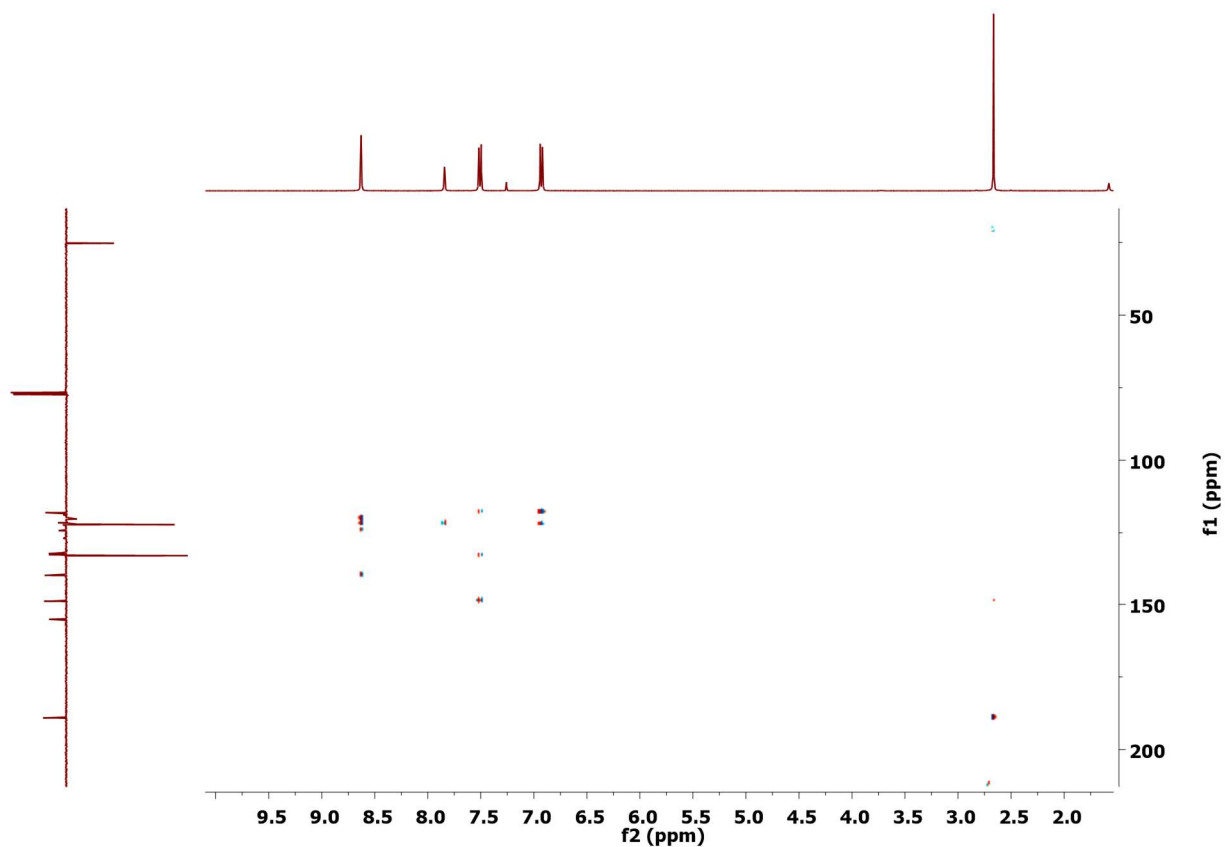

$^1\text{H}$  NMR ( $\text{CDCl}_3$ ) spectrum of (Z)-1-(4-(3,5-bis(trifluoromethyl)phenyl)-5-((4-fluorophenyl)imino)-4,5-dihydro-1,3,4-thiadiazol-2-yl)ethan-1-one

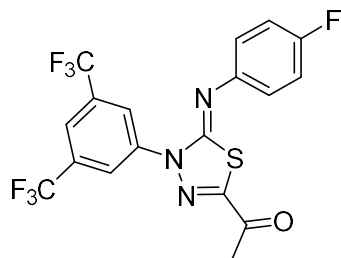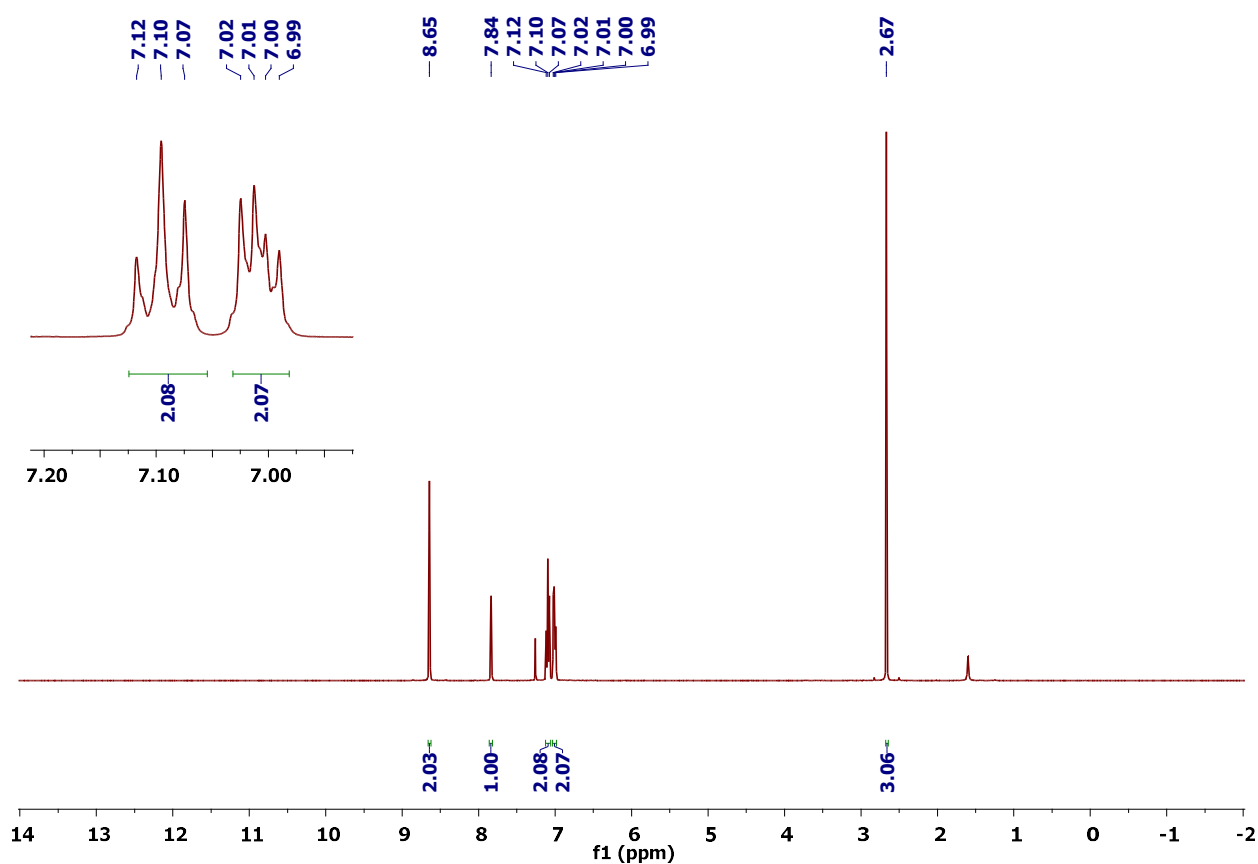



$^{13}\text{C}$  NMR ( $\text{CDCl}_3$ ) spectrum of (Z)-1-(4-(3,5-bis(trifluoromethyl)phenyl)-5-((4-fluorophenyl)imino)-4,5-dihydro-1,3,4-thiadiazol-2-yl)ethan-1-one

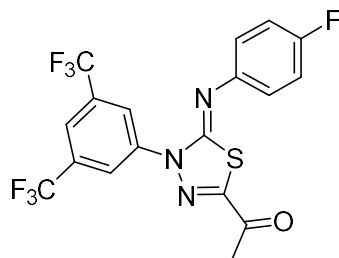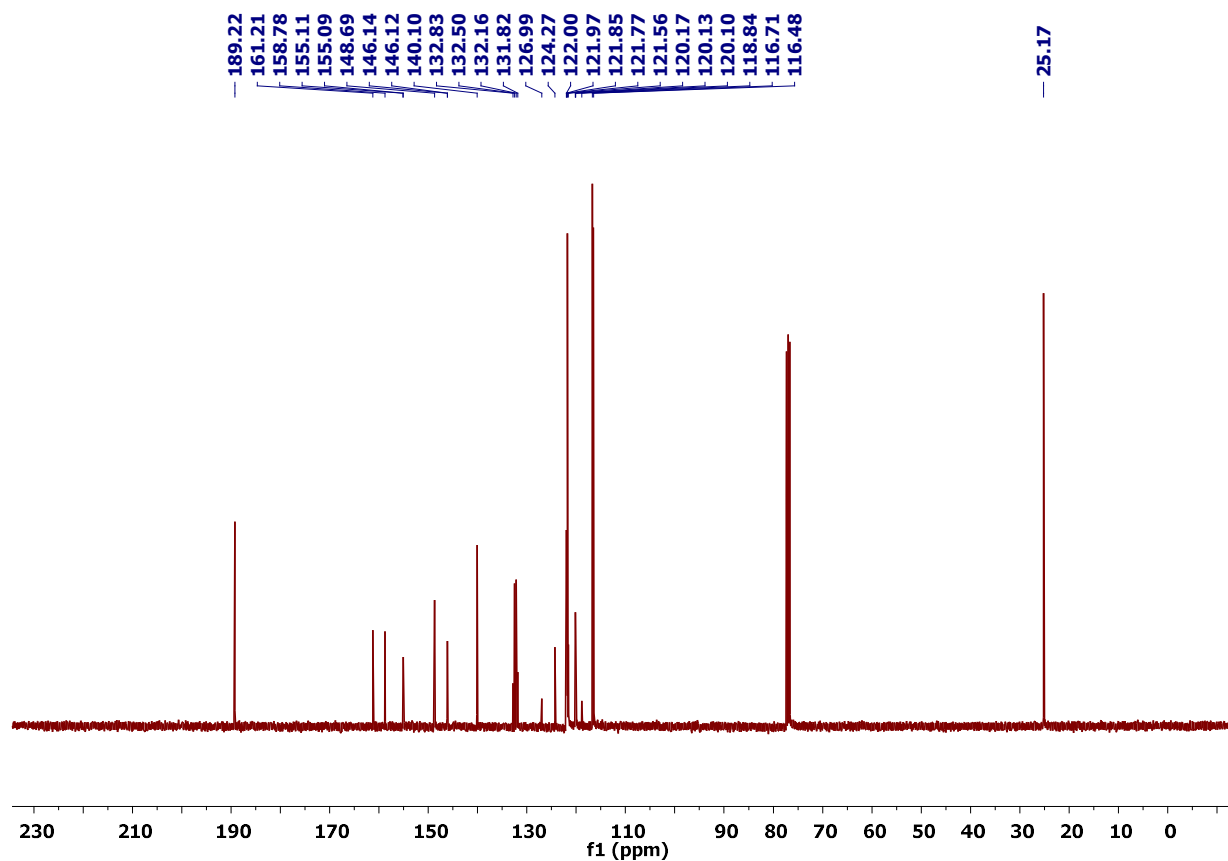

$^{13}\text{C}$  CRAPT NMR ( $\text{CDCl}_3$ ) spectrum of (Z)-1-(4-(3,5-bis(trifluoromethyl)phenyl)-5-((4-fluorophenyl)imino)-4,5-dihydro-1,3,4-thiadiazol-2-yl)ethan-1-one

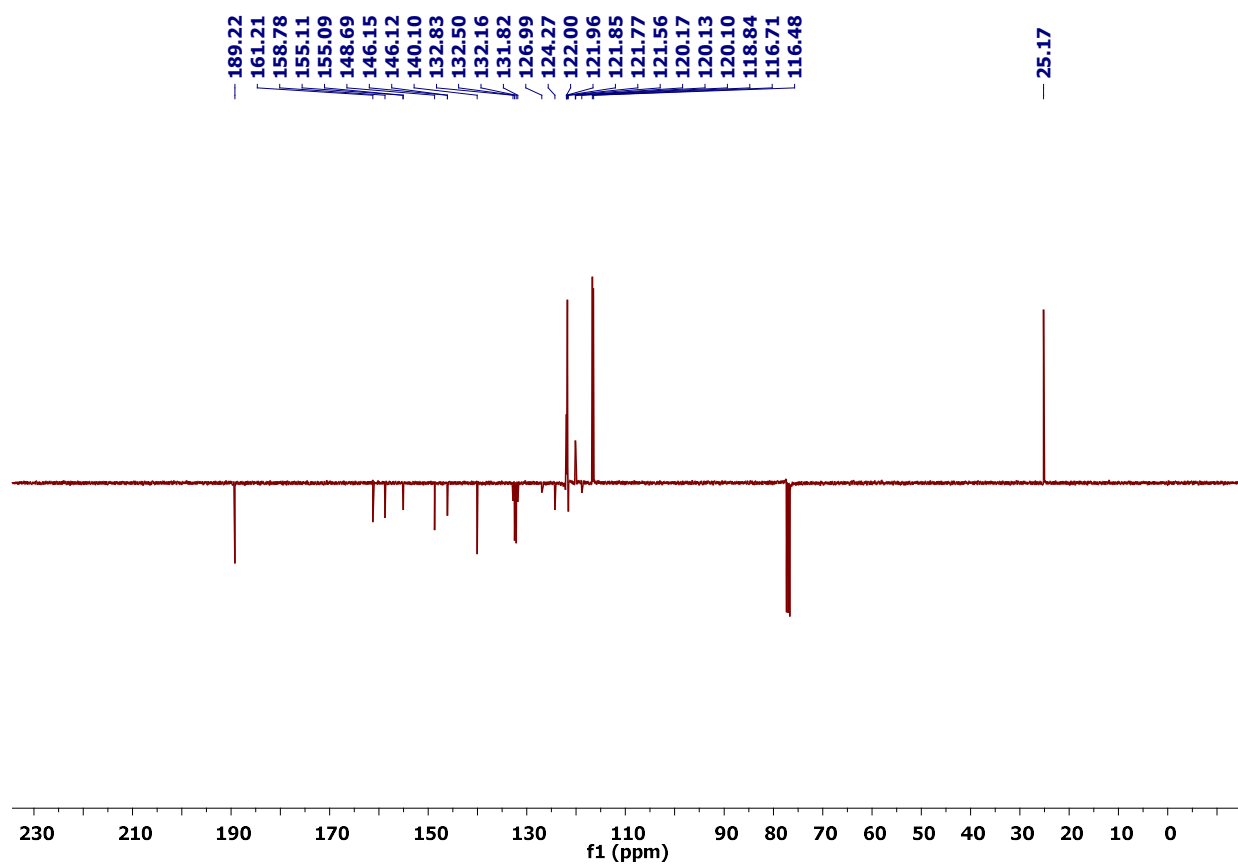

$^1\text{H}$ - $^1\text{H}$  gDQCOSY NMR ( $\text{CDCl}_3$ ) spectrum of (Z)-1-(4-(3,5-bis(trifluoromethyl)phenyl)-5-((4-fluorophenyl)imino)-4,5-dihydro-1,3,4-thiadiazol-2-yl)ethan-1-one

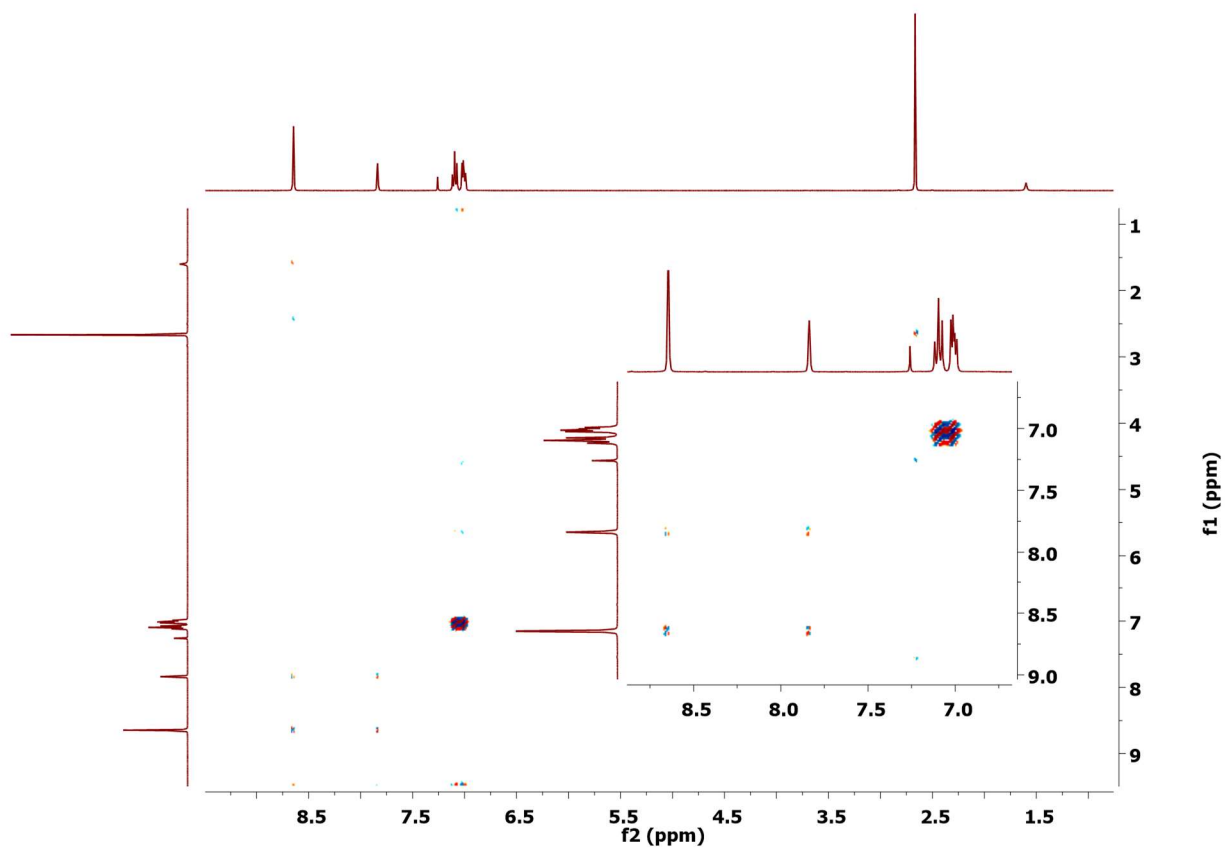

$^1\text{H}$ - $^{13}\text{C}$ -HSQC NMR ( $\text{CDCl}_3$ ) spectrum of (Z)-1-(4-(3,5-bis(trifluoromethyl)phenyl)-5-((4-fluorophenyl)imino)-4,5-dihydro-1,3,4-thiadiazol-2-yl)ethan-1-one

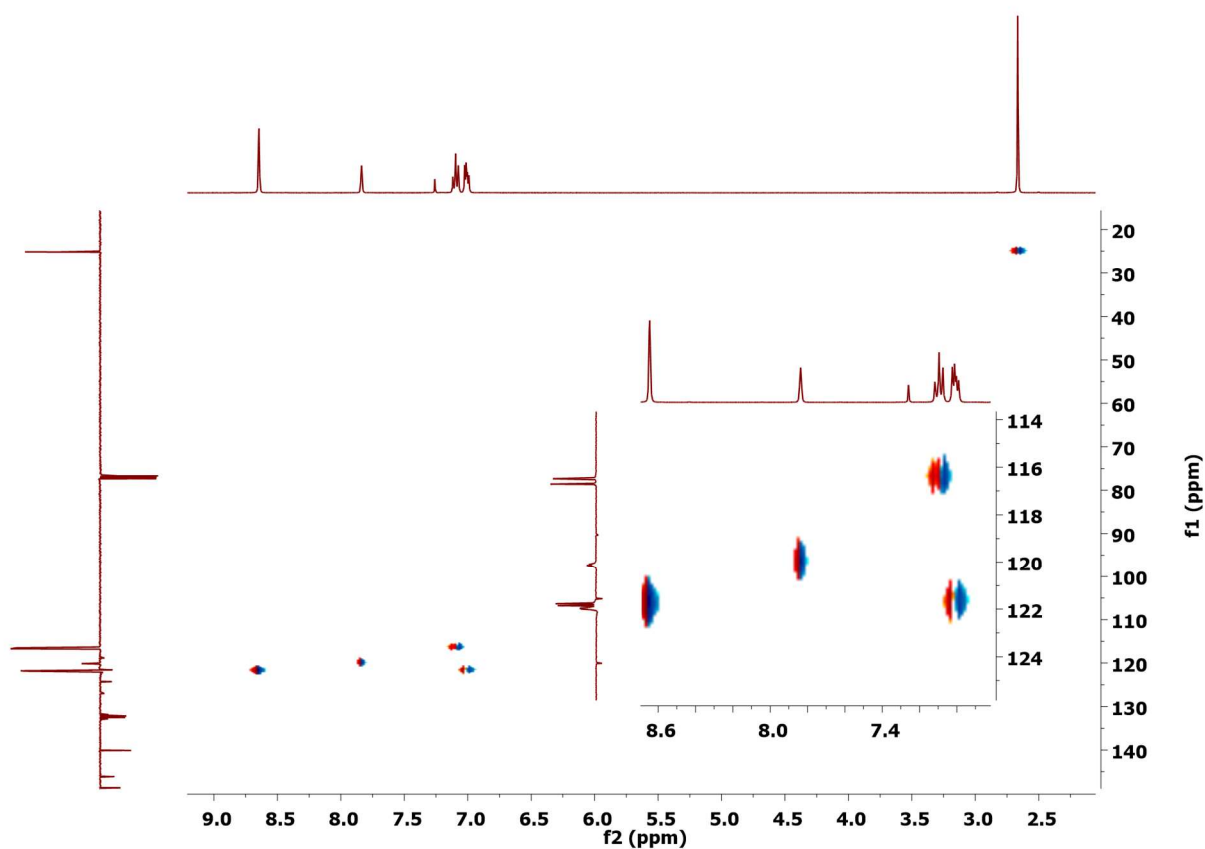

$^1\text{H}$ - $^{13}\text{C}$ -gHMBC NMR ( $\text{CDCl}_3$ ) spectrum of (Z)-1-(4-(3,5-bis(trifluoromethyl)phenyl)-5-((4-fluorophenyl)imino)-4,5-dihydro-1,3,4-thiadiazol-2-yl)ethan-1-one

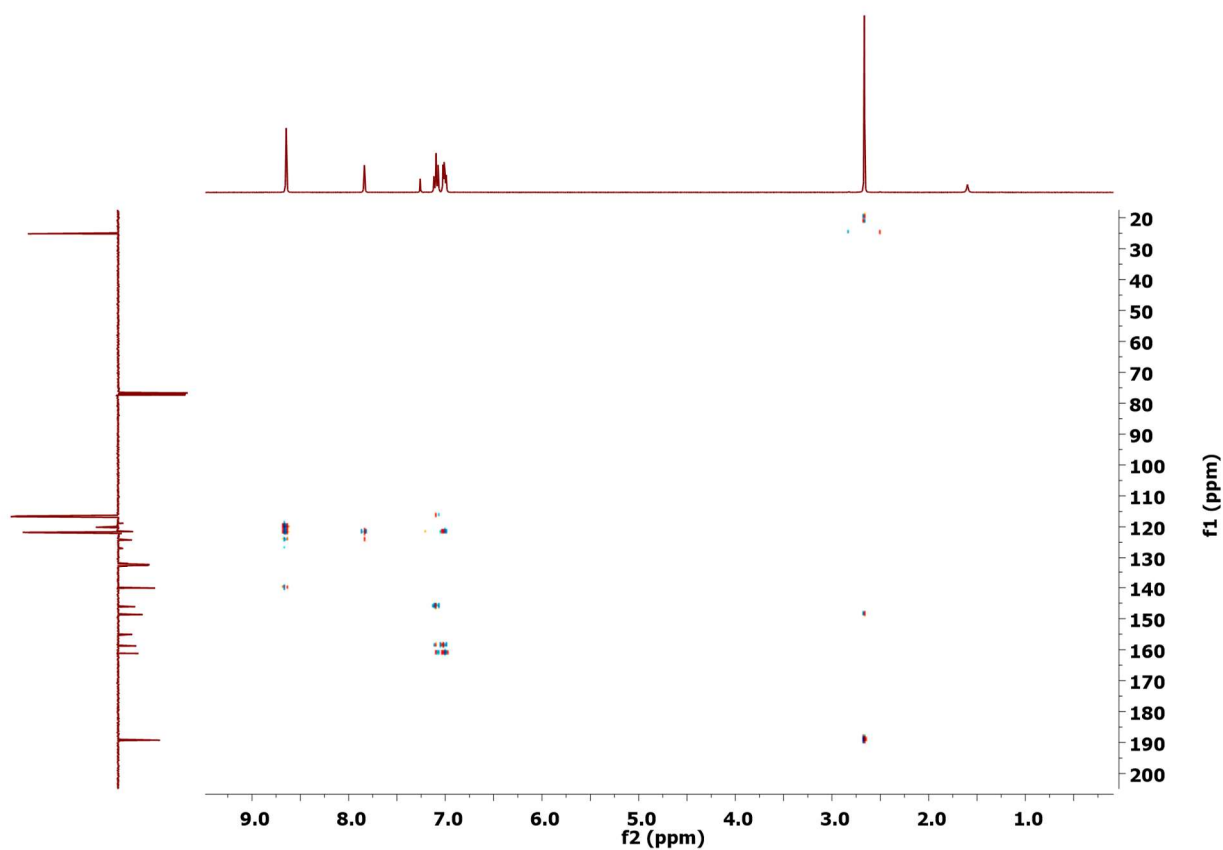

$^1\text{H}$  NMR ( $\text{CDCl}_3$ ) spectrum of (Z)-1-(5-((4-fluorophenyl)imino)-4-(4-iodophenyl)-4,5-dihydro-1,3,4-thiadiazol-2-yl)ethan-1-one

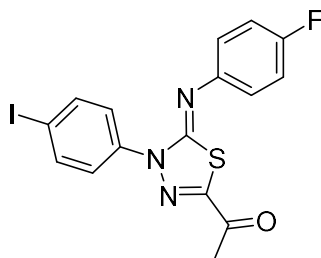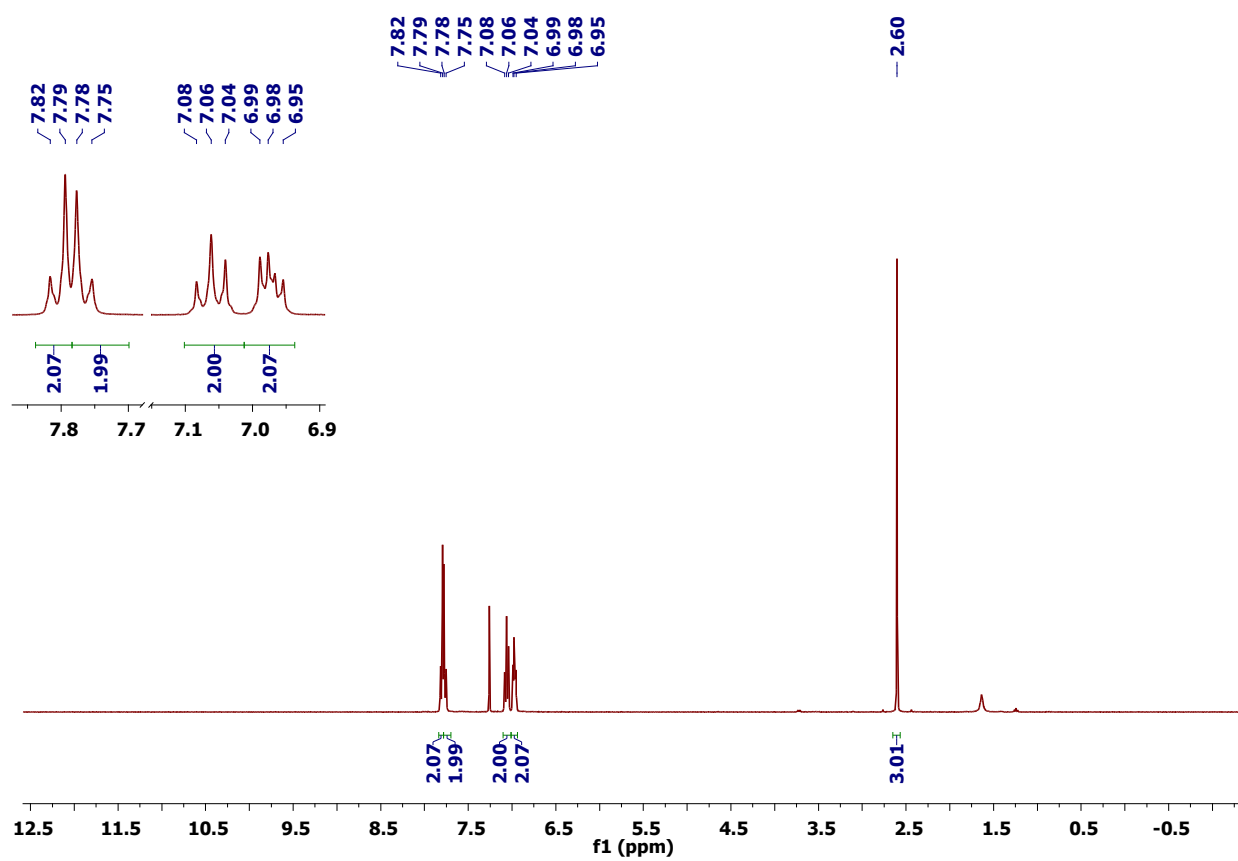

$^{13}\text{C}$  NMR ( $\text{CDCl}_3$ ) spectrum of (Z)-1-(5-((4-fluorophenyl)imino)-4-(4-iodophenyl)-4,5-dihydro-1,3,4-thiadiazol-2-yl)ethan-1-one

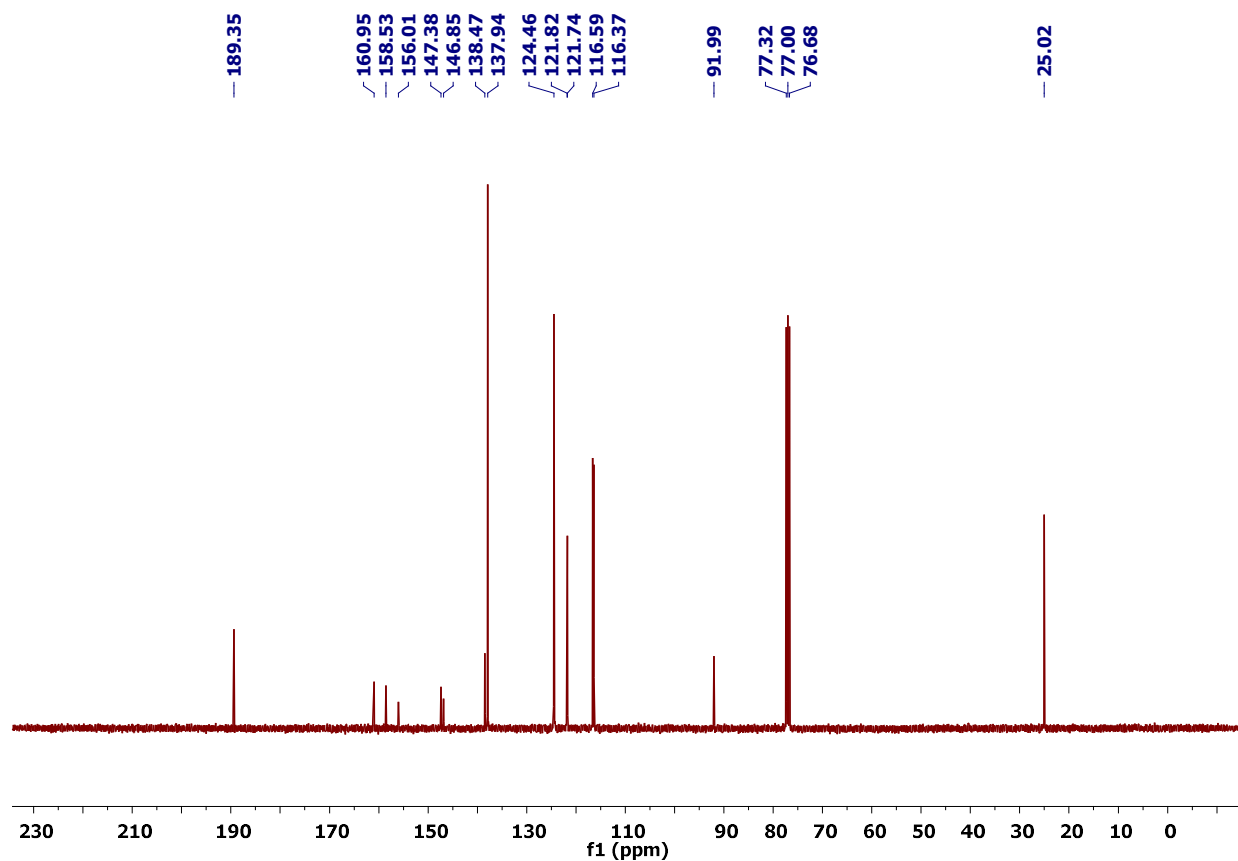

$^{13}\text{C}$  CRAPT NMR ( $\text{CDCl}_3$ ) spectrum of (Z)-1-(5-((4-fluorophenyl)imino)-4-(4-iodophenyl)-4,5-dihydro-1,3,4-thiadiazol-2-yl)ethan-1-one

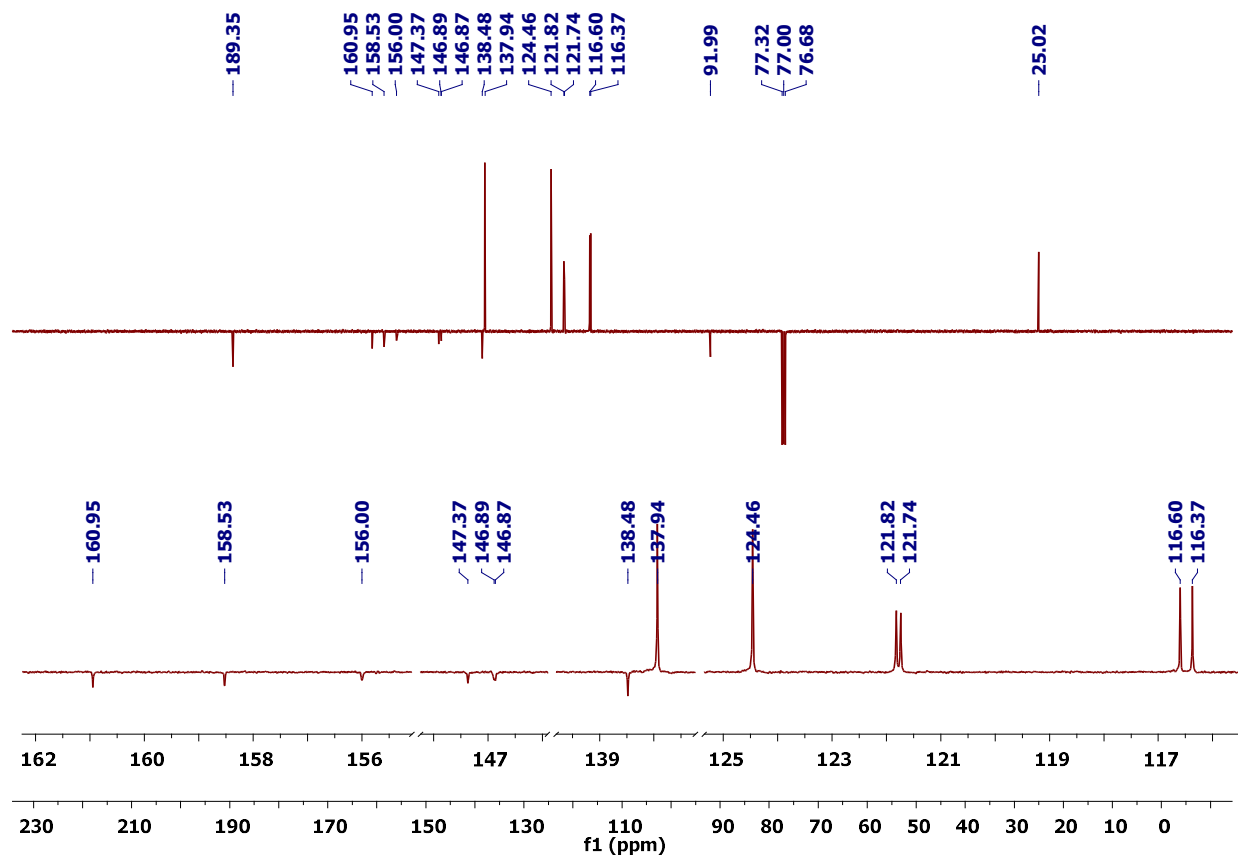



$^1\text{H}$ - $^1\text{H}$  gDQCOSY NMR ( $\text{CDCl}_3$ ) spectrum of (Z)-1-(5-((4-fluorophenyl)imino)-4-(4-iodophenyl)-4,5-dihydro-1,3,4-thiadiazol-2-yl)ethan-1-one

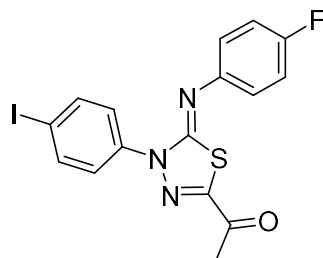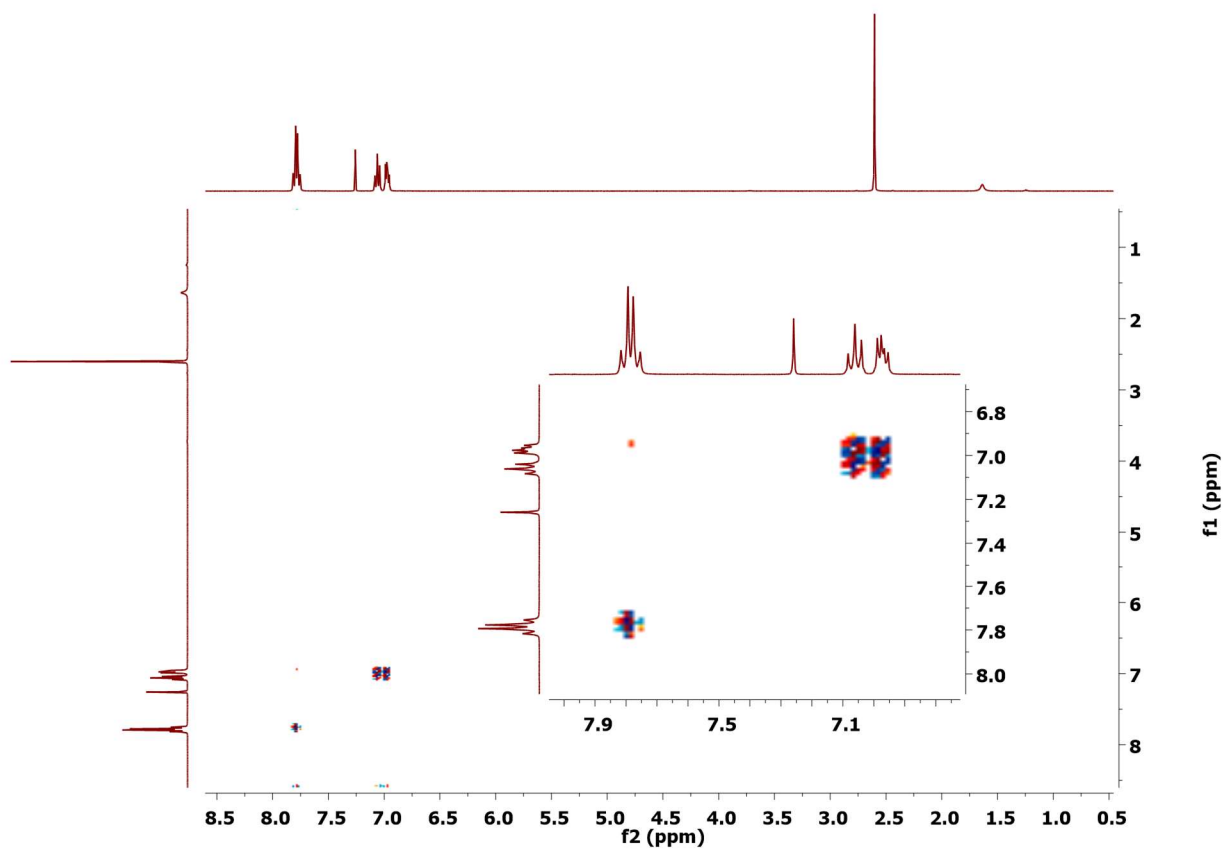

$^1\text{H}$ - $^{13}\text{C}$ -HSQC NMR ( $\text{CDCl}_3$ ) spectrum of (Z)-1-(5-((4-fluorophenyl)imino)-4-(4-iodophenyl)-4,5-dihydro-1,3,4-thiadiazol-2-yl)ethan-1-one

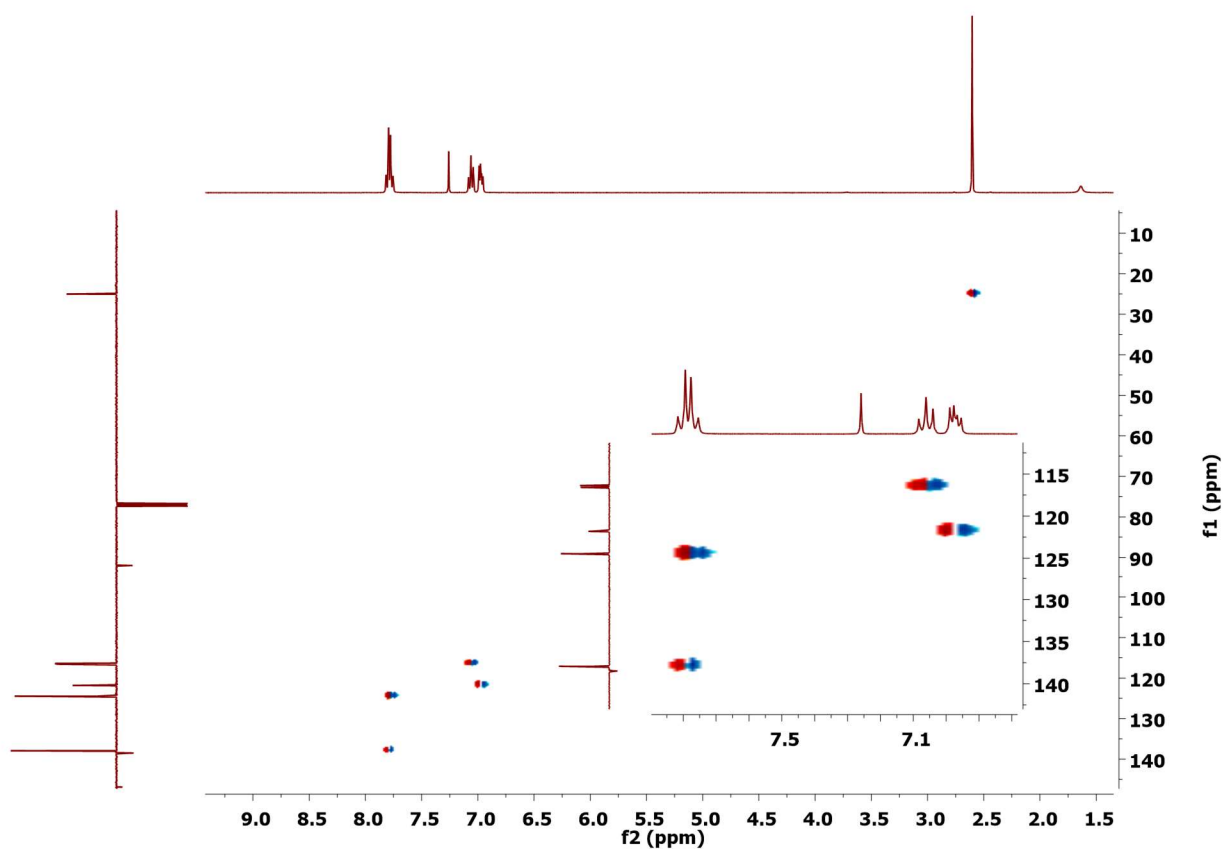

$^1\text{H}$ - $^{13}\text{C}$ -gHMBC NMR ( $\text{CDCl}_3$ ) spectrum of (Z)-1-(5-((4-fluorophenyl)imino)-4-(4-iodophenyl)-4,5-dihydro-1,3,4-thiadiazol-2-yl)ethan-1-one

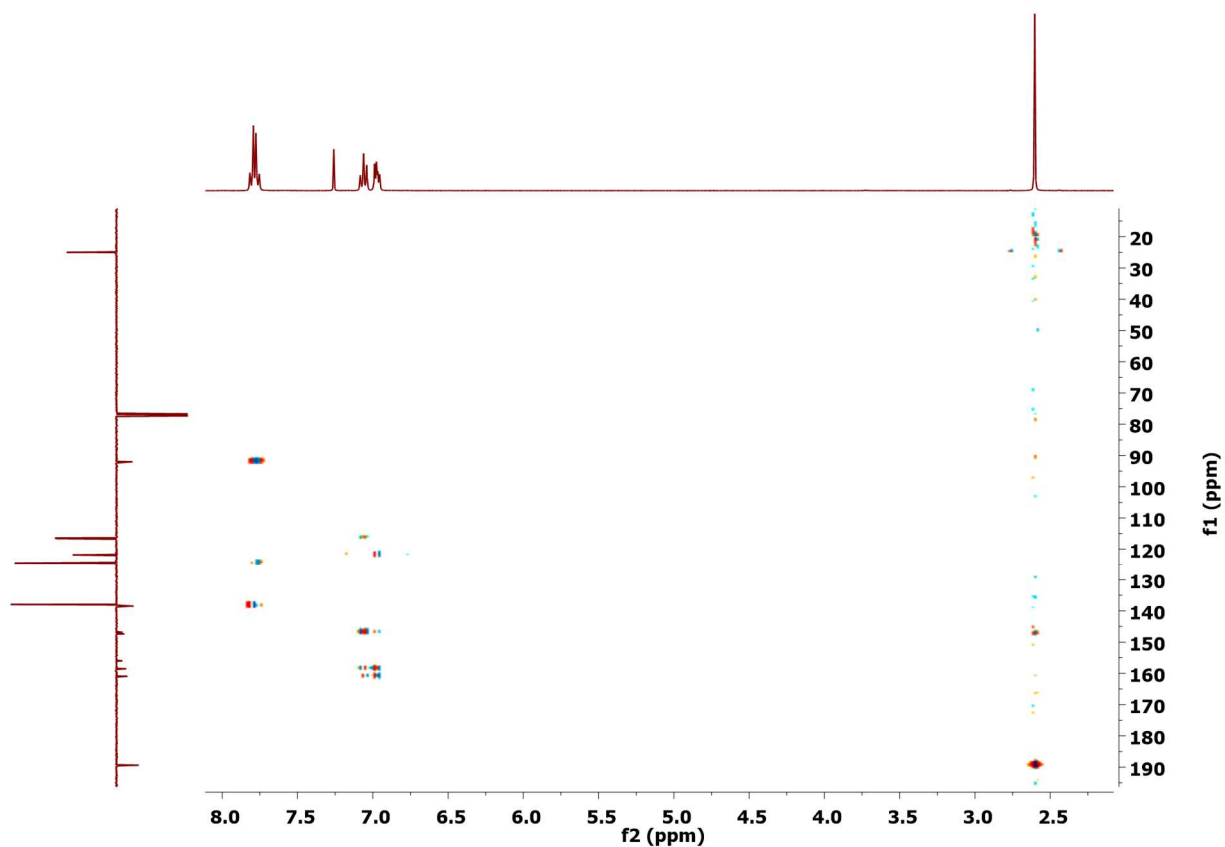

$^1\text{H}$  NMR ( $\text{CDCl}_3$ ) spectrum of (Z)-1-(4-(4-bromophenyl)-5-((4-fluorophenyl)imino)-4,5-dihydro-1,3,4-thiadiazol-2-yl)ethan-1-one

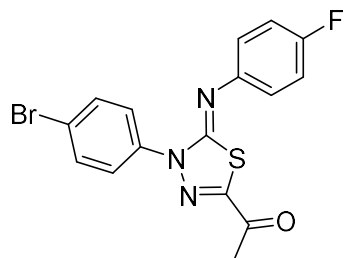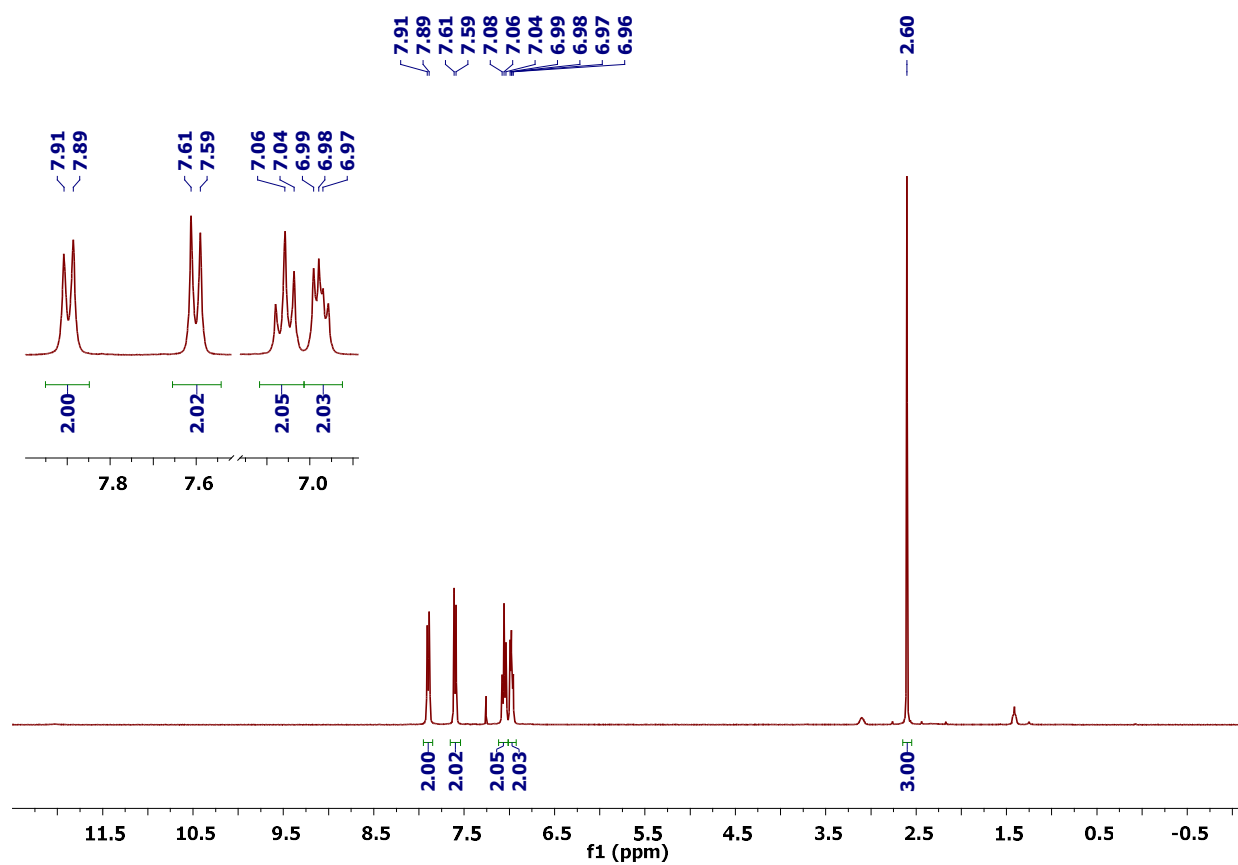

$^{13}\text{C}$  NMR ( $\text{CDCl}_3$ ) spectrum of (Z)-1-(4-(4-bromophenyl)-5-((4-fluorophenyl)imino)-4,5-dihydro-1,3,4-thiadiazol-2-yl)ethan-1-one

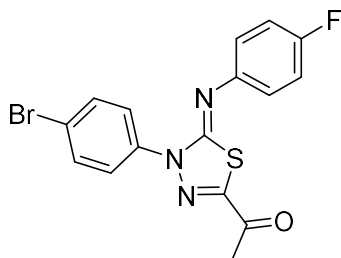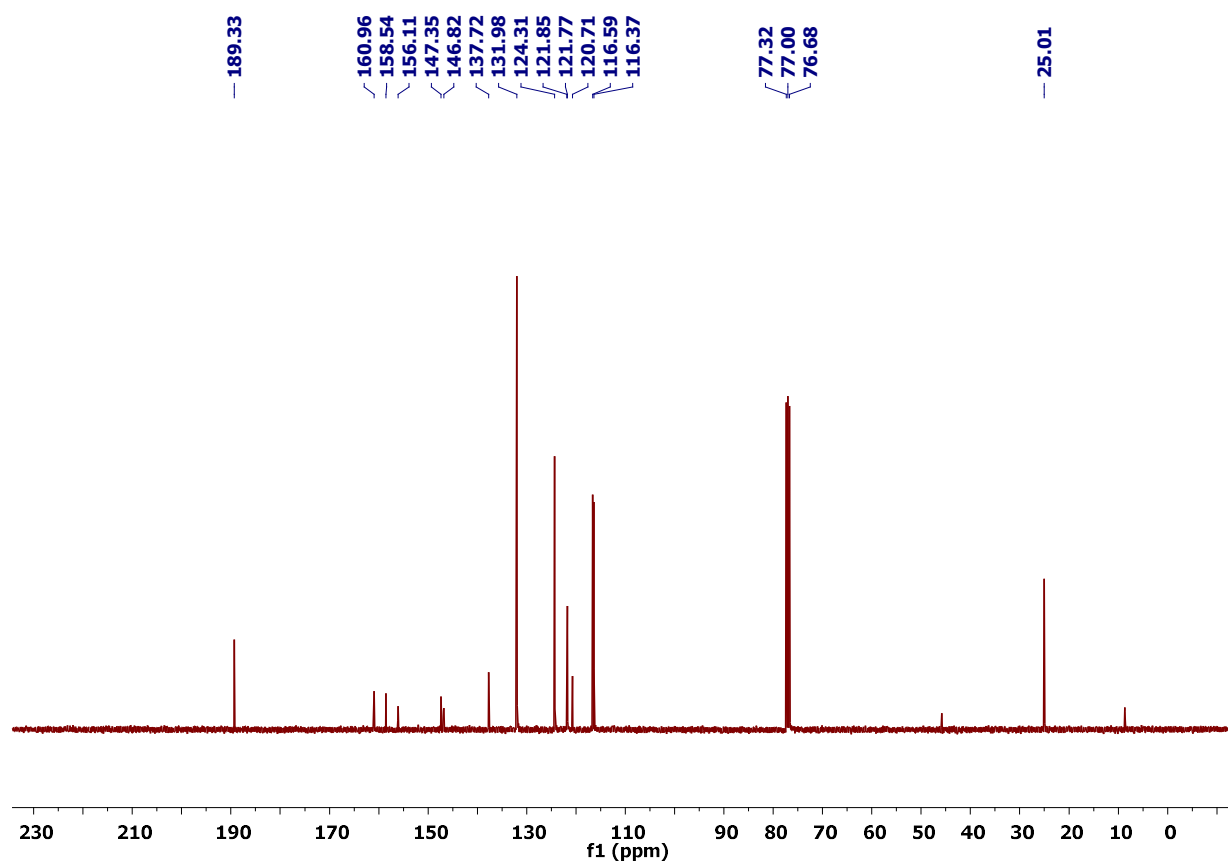

$^{13}\text{C}$  CRAPT NMR ( $\text{CDCl}_3$ ) spectrum of (Z)-1-(4-(4-bromophenyl)-5-((4-fluorophenyl)imino)-4,5-dihydro-1,3,4-thiadiazol-2-yl)ethan-1-one

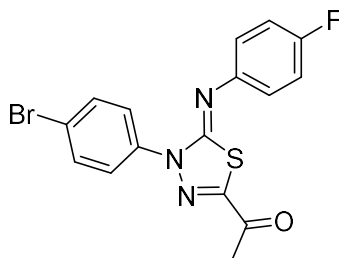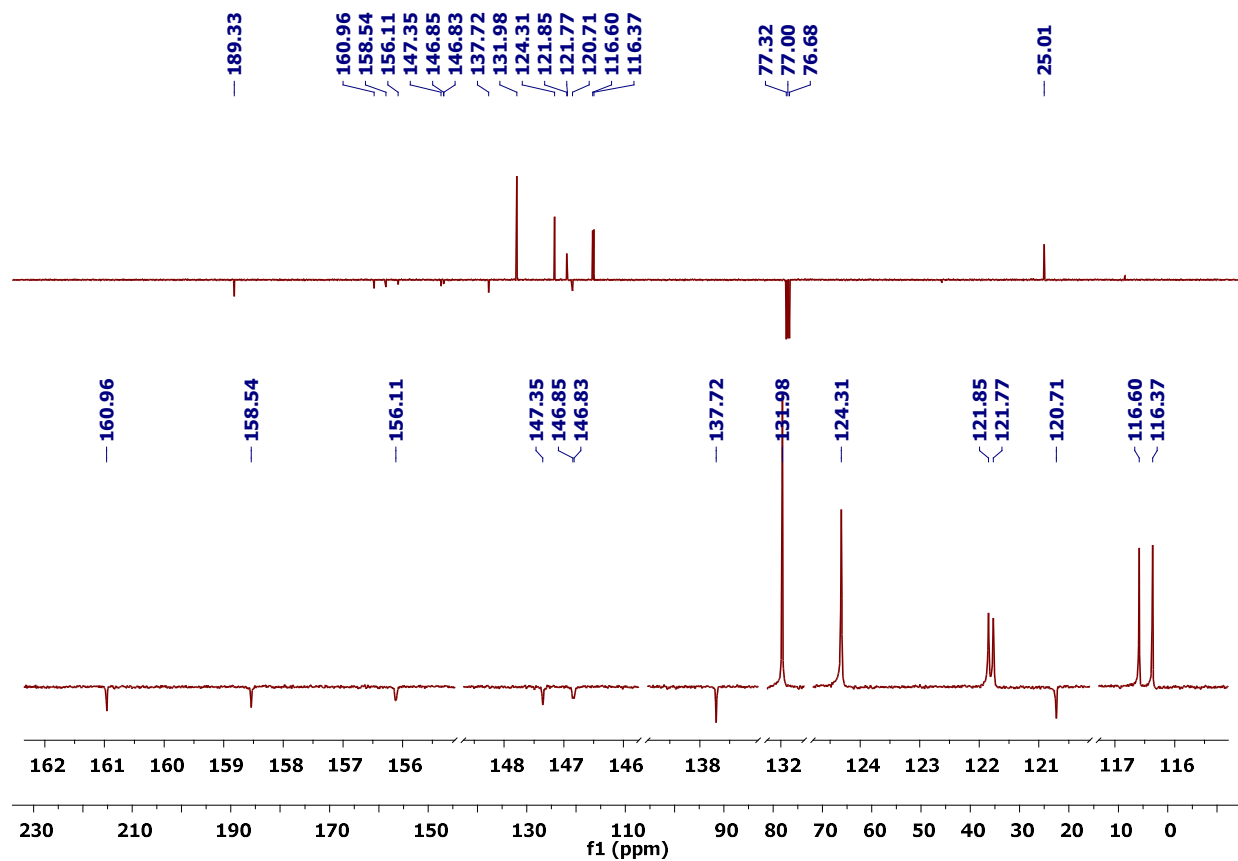

$^1\text{H}$ - $^1\text{H}$  gDQCOSY NMR ( $\text{CDCl}_3$ ) spectrum of (Z)-1-(4-(4-bromophenyl)-5-((4-fluorophenyl)imino)-4,5-dihydro-1,3,4-thiadiazol-2-yl)ethan-1-one

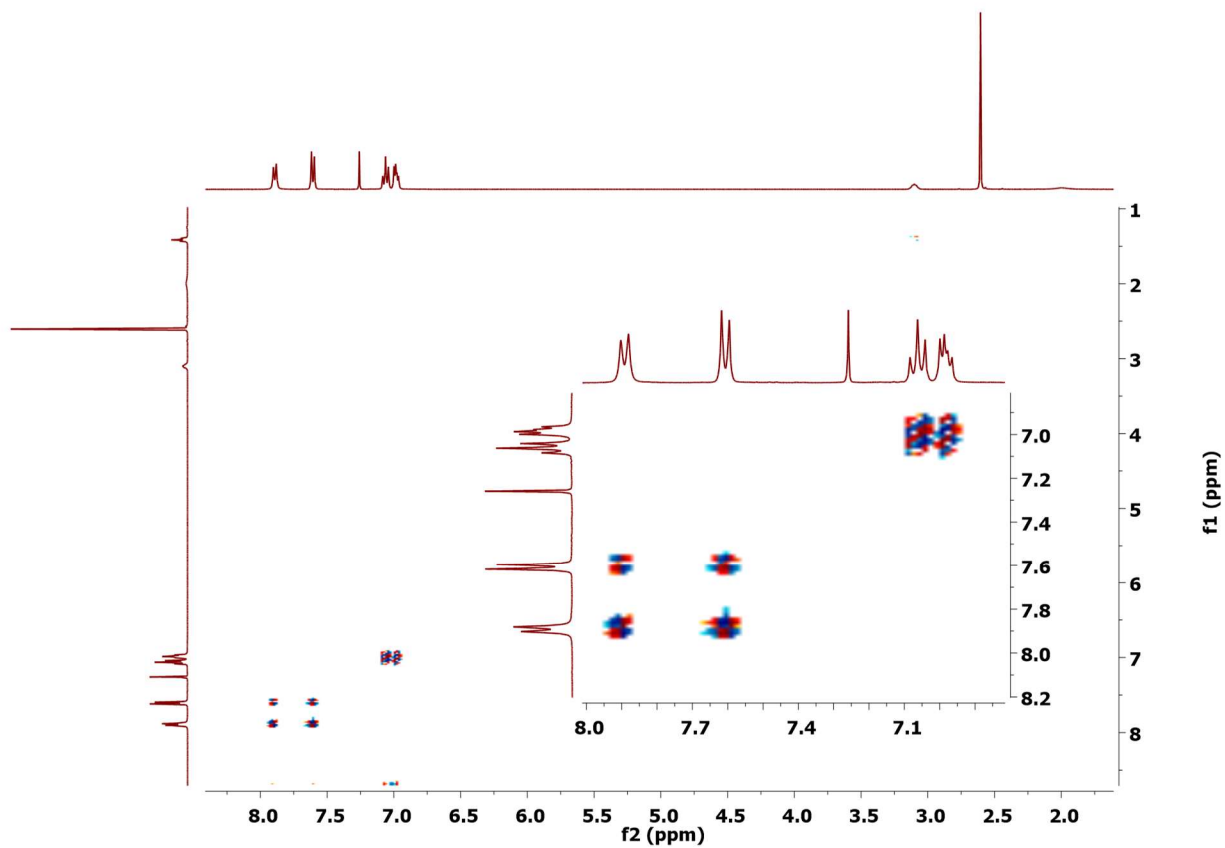

$^1\text{H}$ - $^{13}\text{C}$ -HSQC NMR ( $\text{CDCl}_3$ ) spectrum of (Z)-1-(4-(4-bromophenyl)-5-((4-fluorophenyl)imino)-4,5-dihydro-1,3,4-thiadiazol-2-yl)ethan-1-one

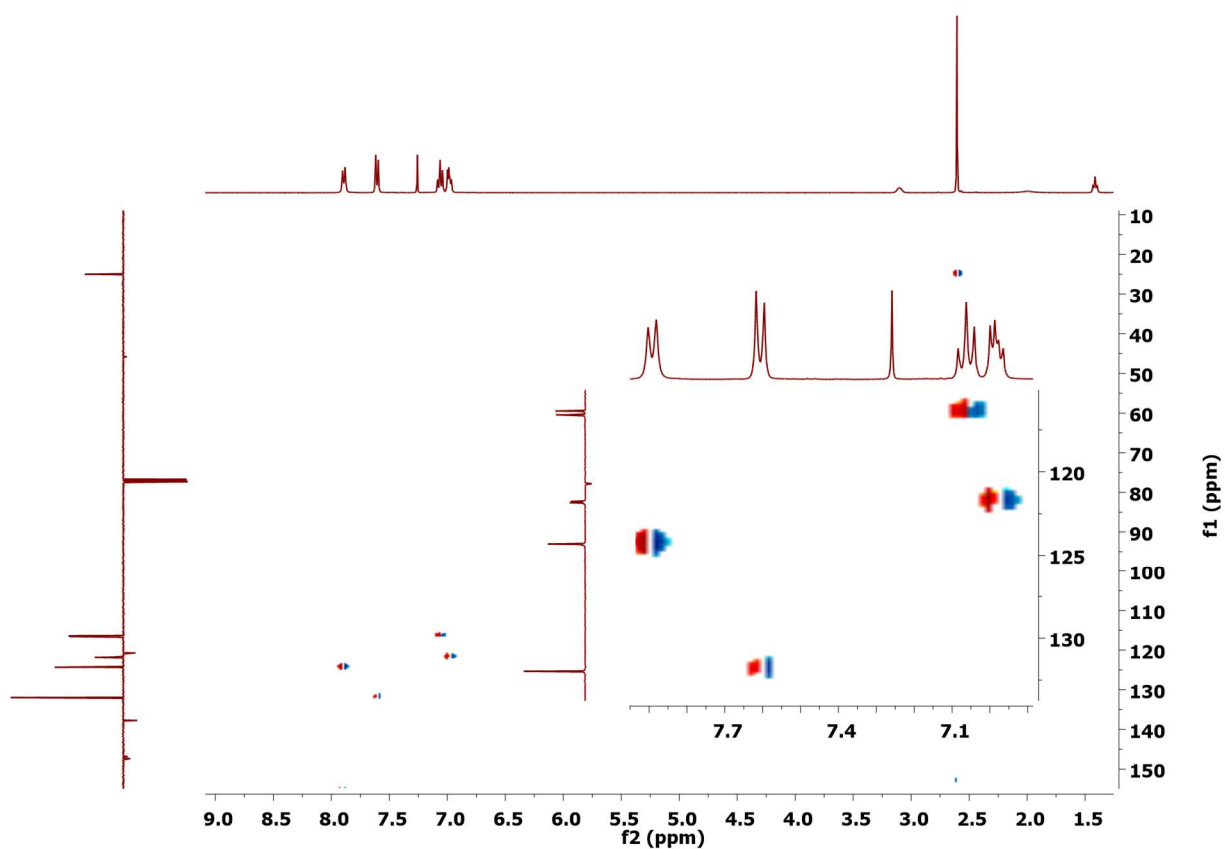



$^1\text{H}$ - $^{13}\text{C}$ -gHMBC NMR ( $\text{CDCl}_3$ ) spectrum of (Z)-1-(4-(4-bromophenyl)-5-((4-fluorophenyl)imino)-4,5-dihydro-1,3,4-thiadiazol-2-yl)ethan-1-one

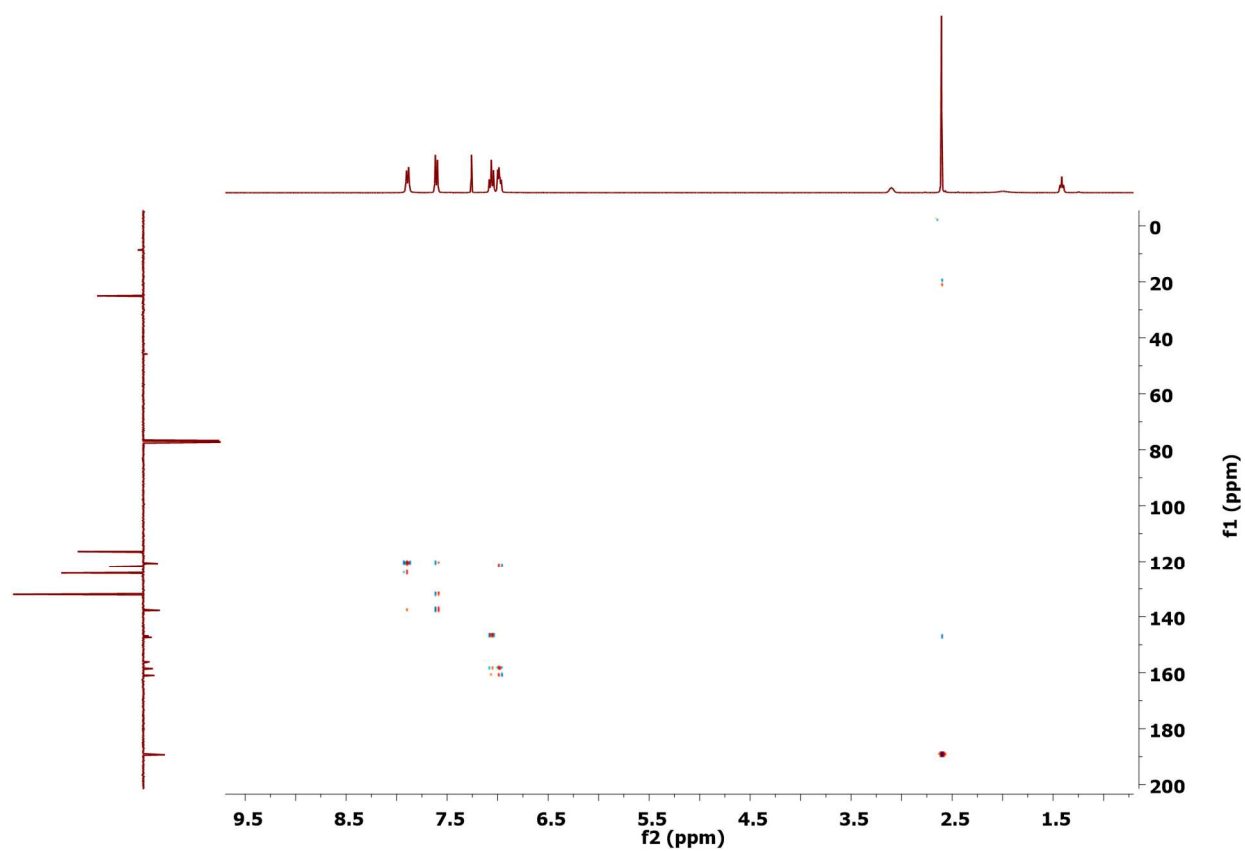

$^1\text{H}$  NMR ( $\text{CDCl}_3$ ) spectrum of (Z)-1-(4-(4-chlorophenyl)-5-((4-fluorophenyl)imino)-4,5-dihydro-1,3,4-thiadiazol-2-yl)ethan-1-one

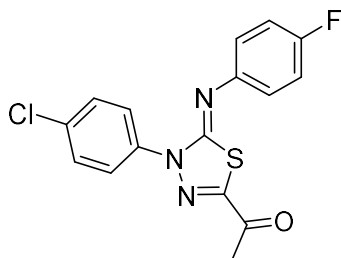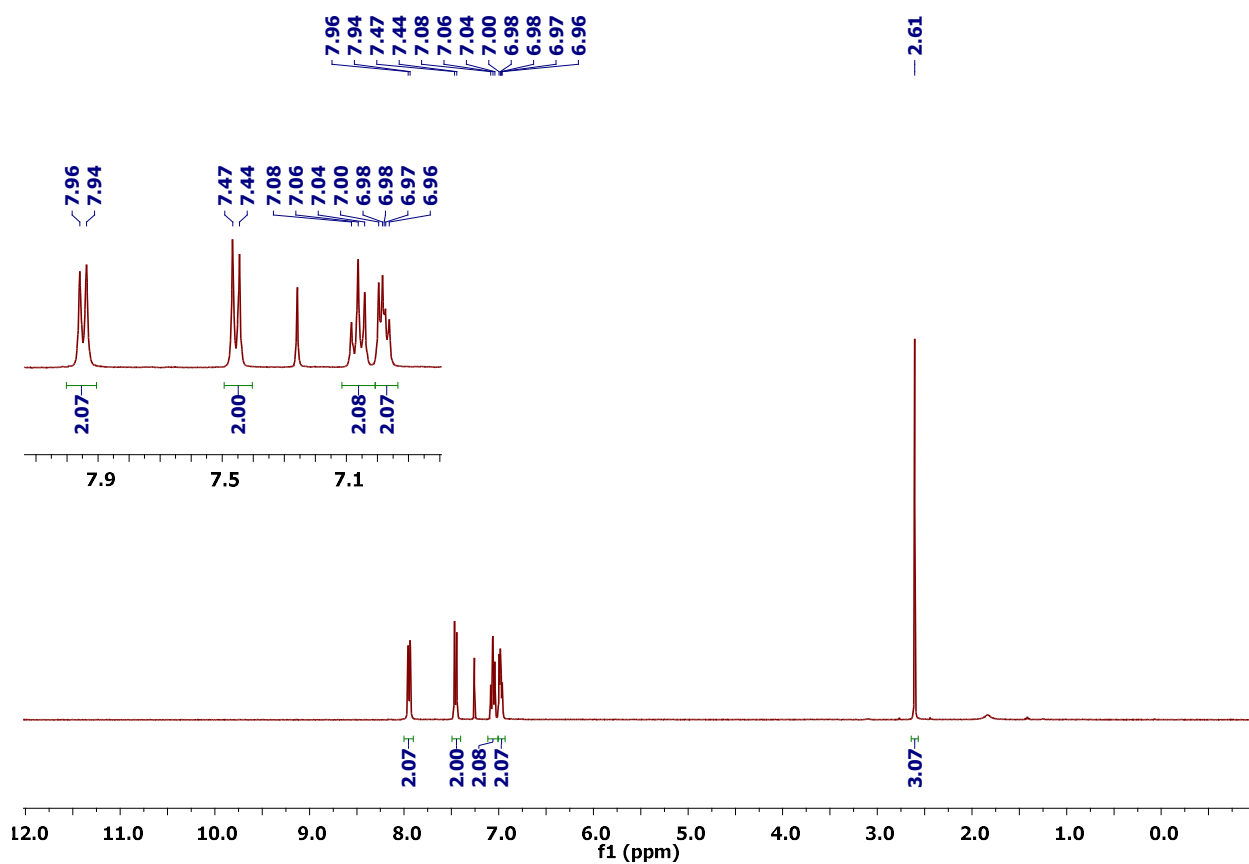

$^{13}\text{C}$  NMR ( $\text{CDCl}_3$ ) spectrum of (Z)-1-(4-(4-chlorophenyl)-5-((4-fluorophenyl)imino)-4,5-dihydro-1,3,4-thiadiazol-2-yl)ethan-1-one

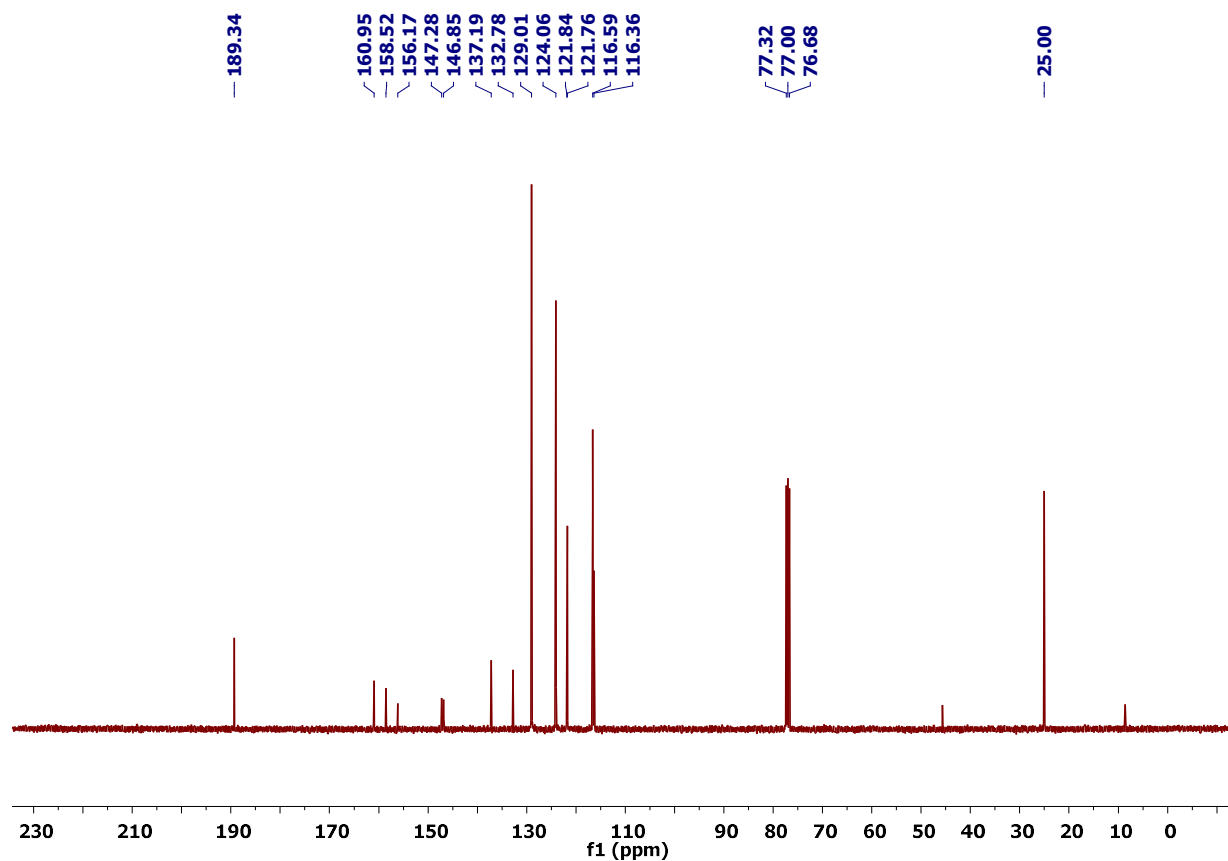

$^{13}\text{C}$  CRAPT NMR ( $\text{CDCl}_3$ ) spectrum of (Z)-1-(4-(4-chlorophenyl)-5-((4-fluorophenyl)imino)-4,5-dihydro-1,3,4-thiadiazol-2-yl)ethan-1-one

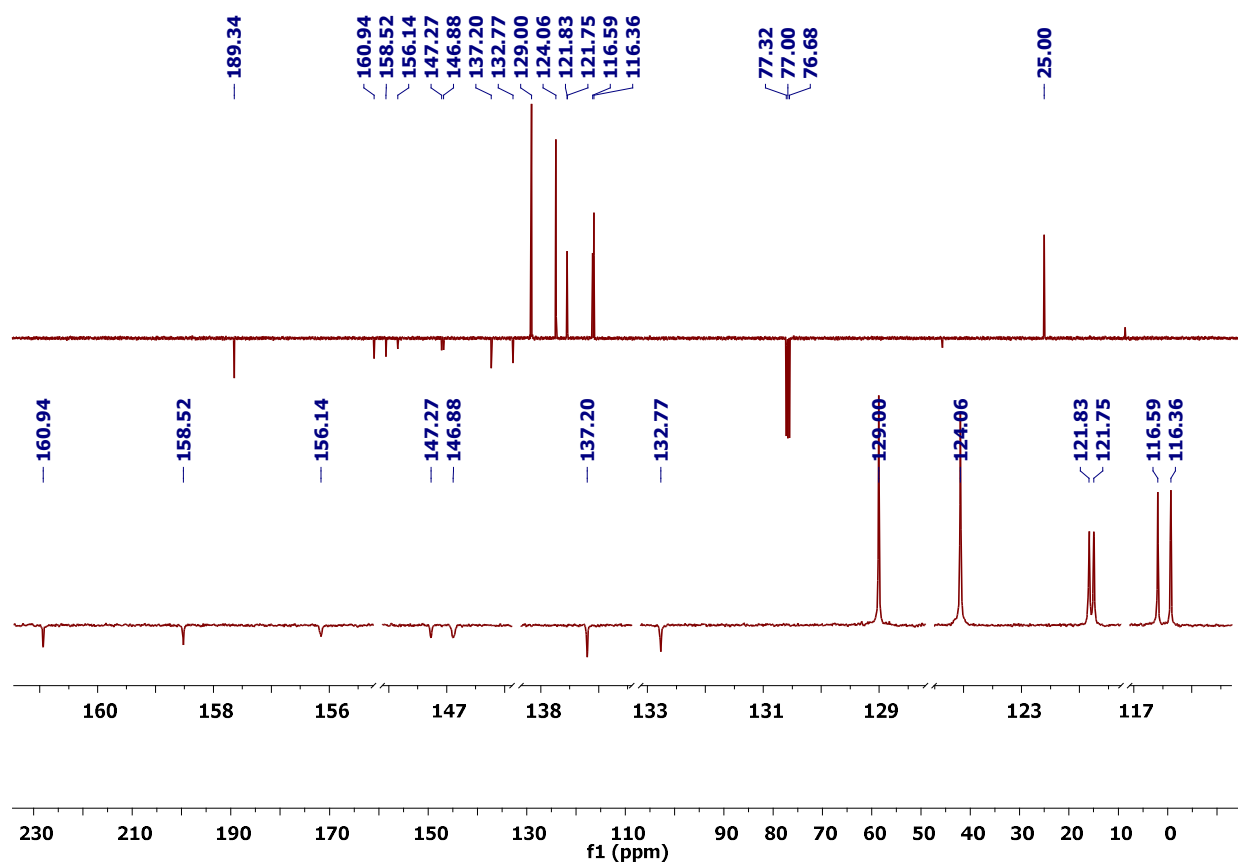

$^1\text{H}$ - $^1\text{H}$  gDQCOSY NMR ( $\text{CDCl}_3$ ) spectrum of (Z)-1-(4-(4-chlorophenyl)-5-((4-fluorophenyl)imino)-4,5-dihydro-1,3,4-thiadiazol-2-yl)ethan-1-one

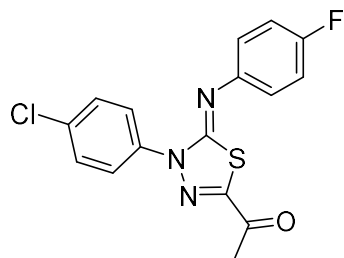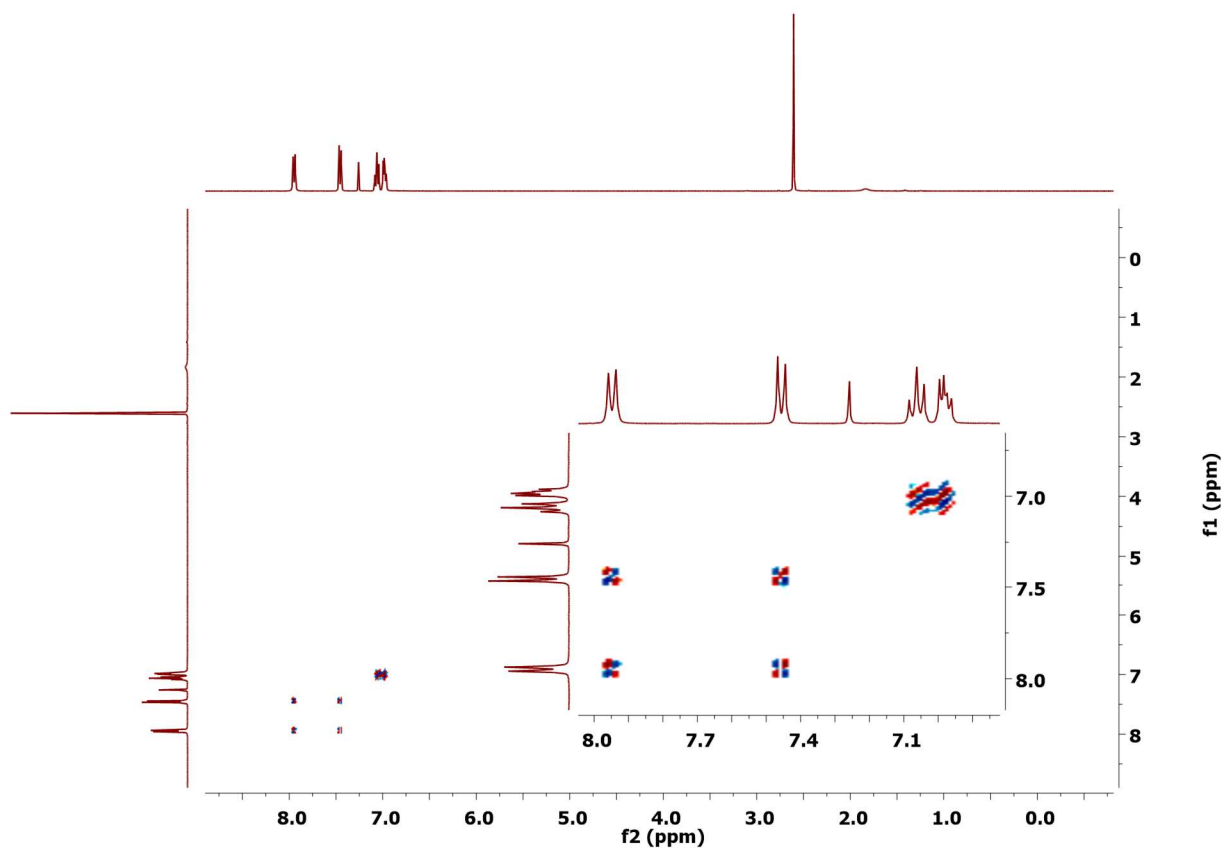

$^1\text{H}$ - $^{13}\text{C}$ -HSQC NMR ( $\text{CDCl}_3$ ) spectrum of (Z)-1-(4-(4-chlorophenyl)-5-((4-fluorophenyl)imino)-4,5-dihydro-1,3,4-thiadiazol-2-yl)ethan-1-one

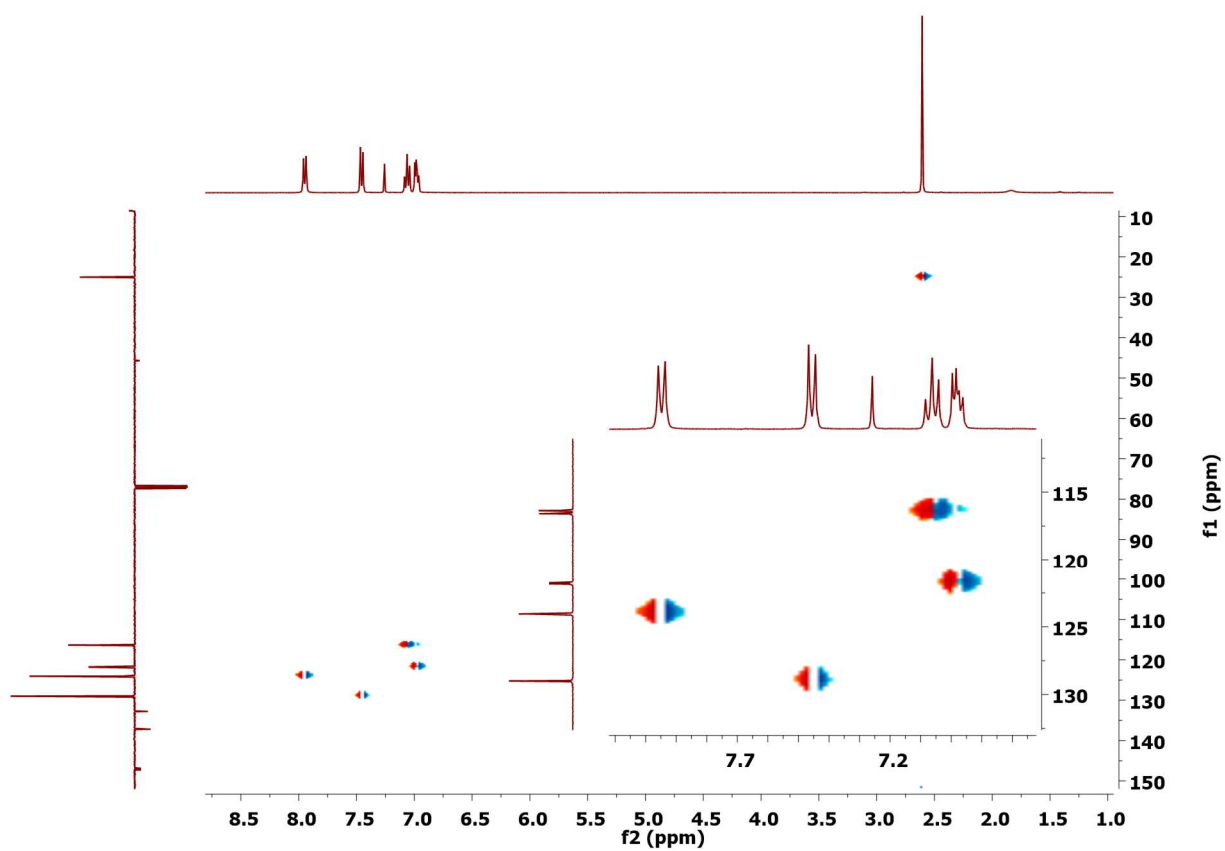

$^1\text{H}$ - $^{13}\text{C}$ -gHMBC NMR ( $\text{CDCl}_3$ ) spectrum of (Z)-1-(4-(4-chlorophenyl)-5-((4-fluorophenyl)imino)-4,5-dihydro-1,3,4-thiadiazol-2-yl)ethan-1-one

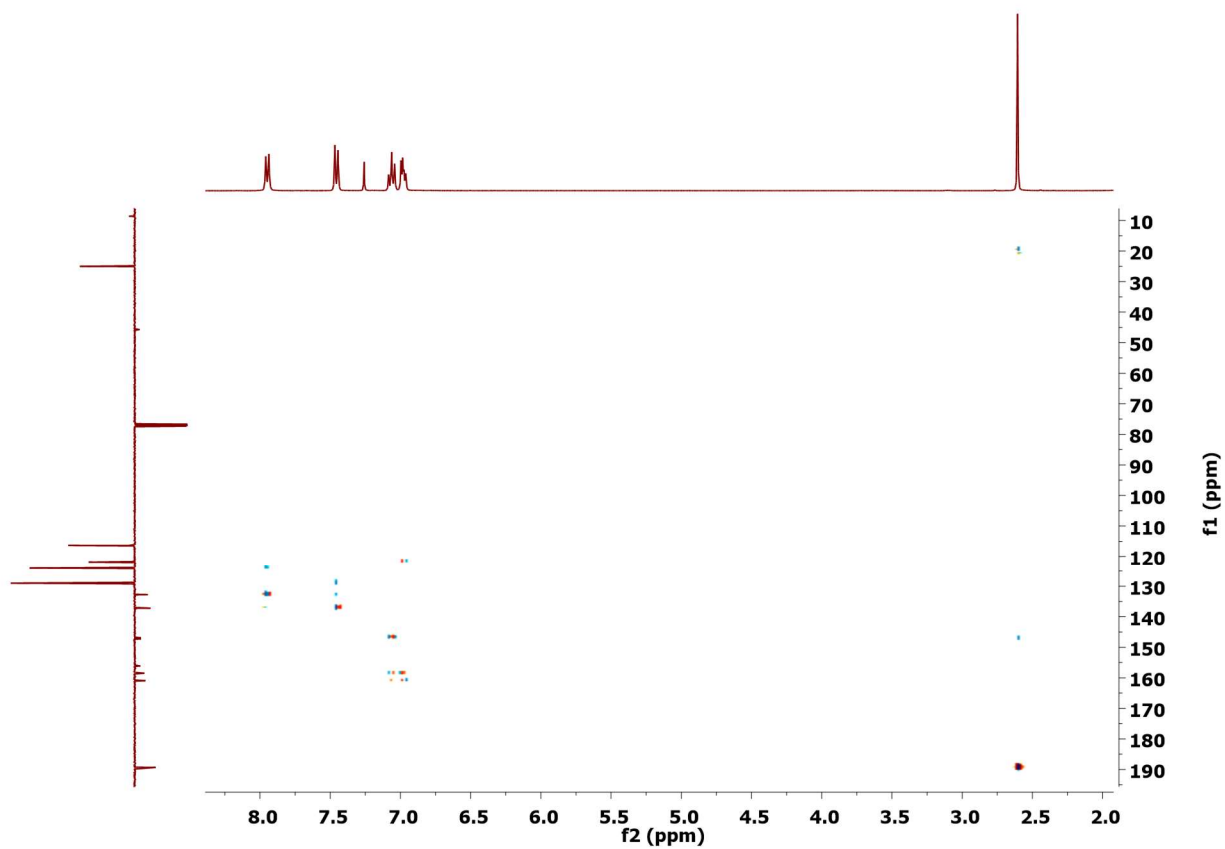

$^1\text{H}$  NMR ( $\text{CDCl}_3$ ) spectrum of (Z)-1-(5-((4-fluorophenyl)imino)-4-phenyl-4,5-dihydro-1,3,4-thiadiazol-2-yl)ethan-1-one

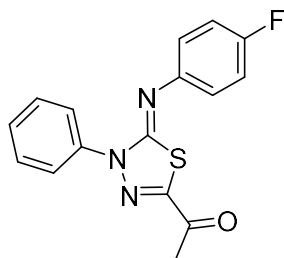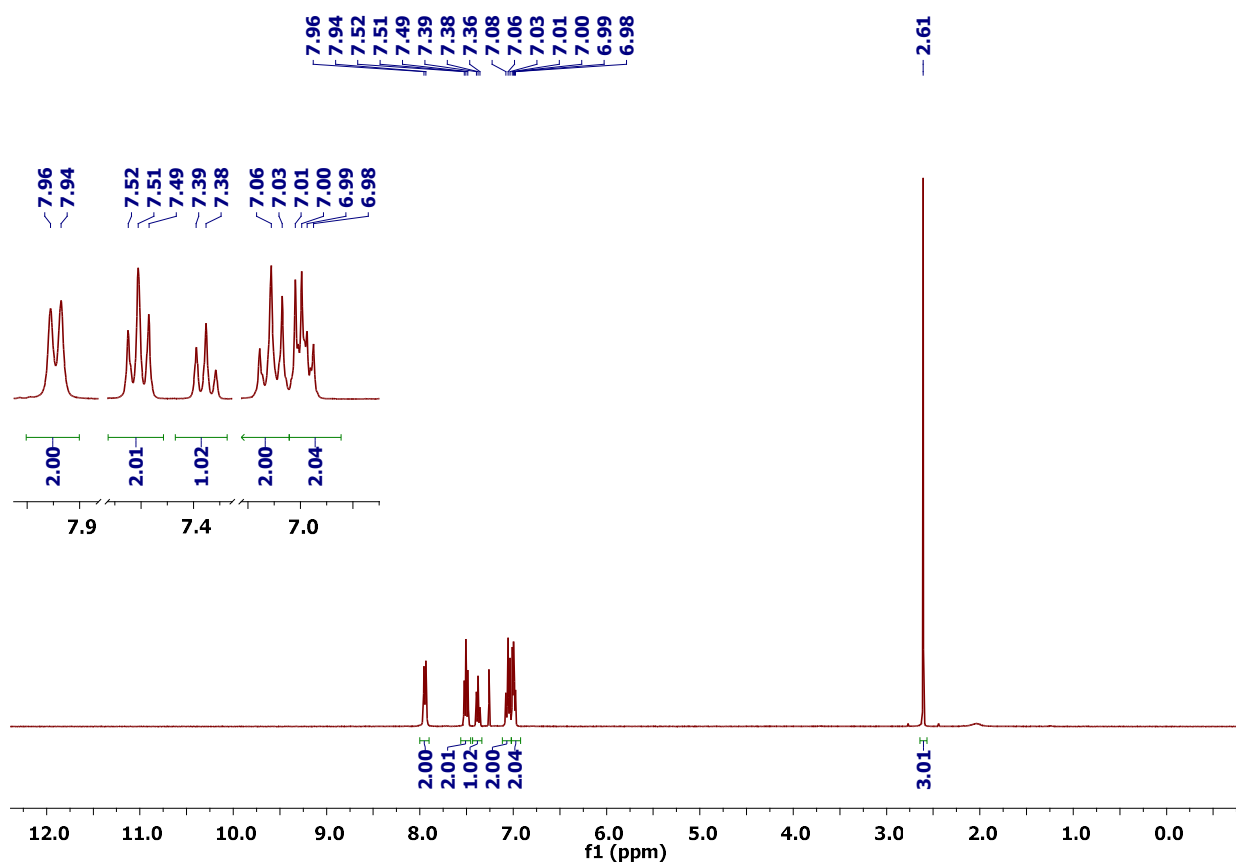



$^{13}\text{C}$  NMR ( $\text{CDCl}_3$ ) spectrum of (Z)-1-(5-((4-fluorophenyl)imino)-4-phenyl-4,5-dihydro-1,3,4-thiadiazol-2-yl)ethan-1-one

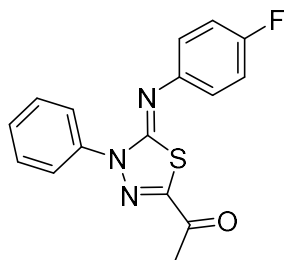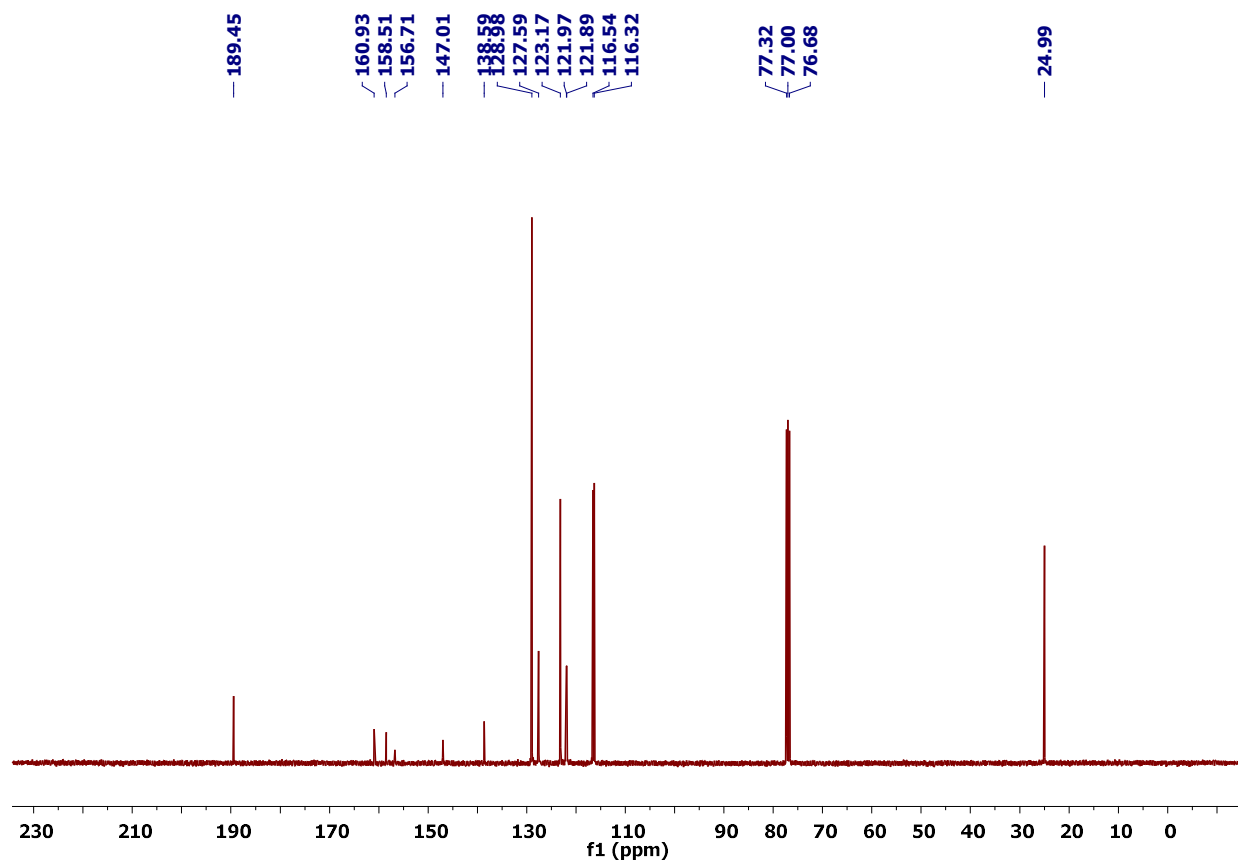

$^{13}\text{C}$  CRAPT NMR ( $\text{CDCl}_3$ ) spectrum of (Z)-1-(5-((4-fluorophenyl)imino)-4-phenyl-4,5-dihydro-1,3,4-thiadiazol-2-yl)ethan-1-one

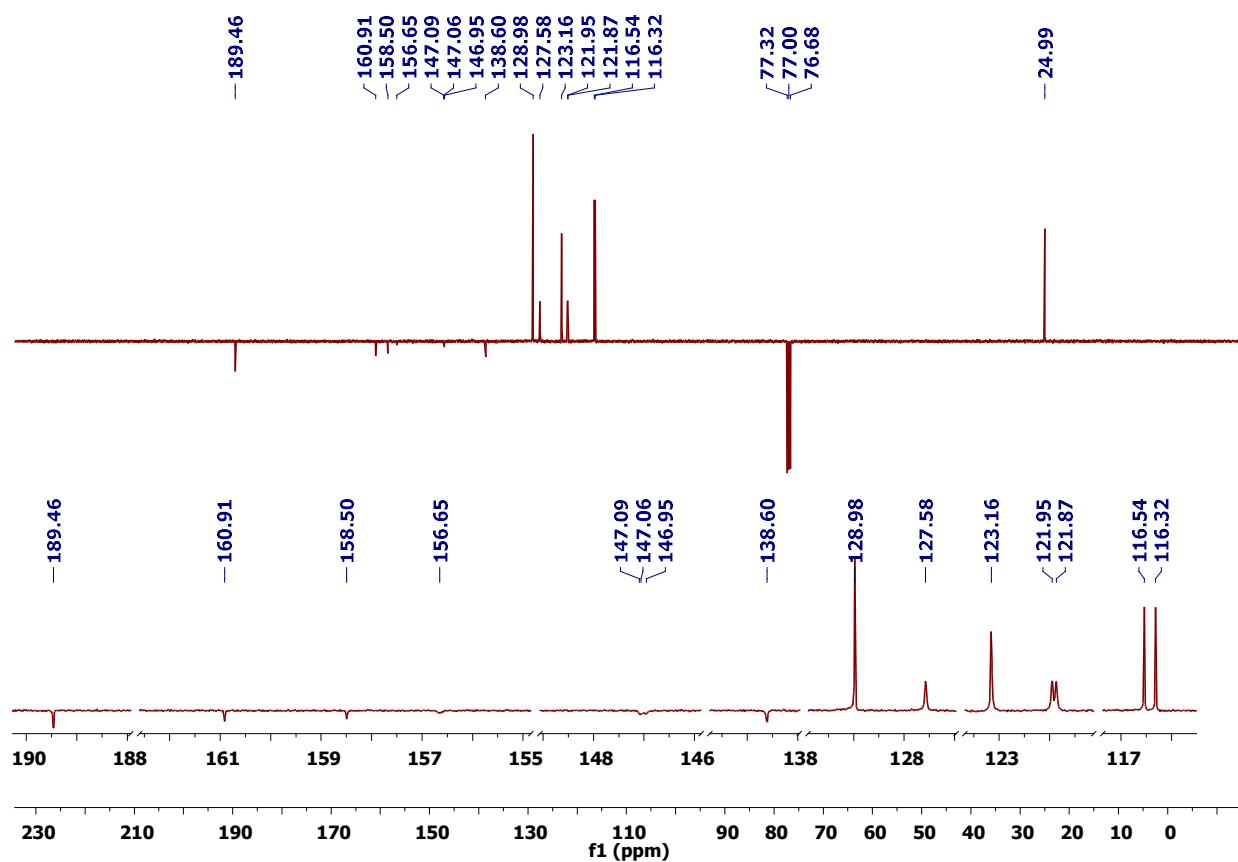

$^1\text{H}$ - $^1\text{H}$  gDQCOSY NMR ( $\text{CDCl}_3$ ) spectrum of (Z)-1-(5-((4-fluorophenyl)imino)-4-phenyl-4,5-dihydro-1,3,4-thiadiazol-2-yl)ethan-1-one

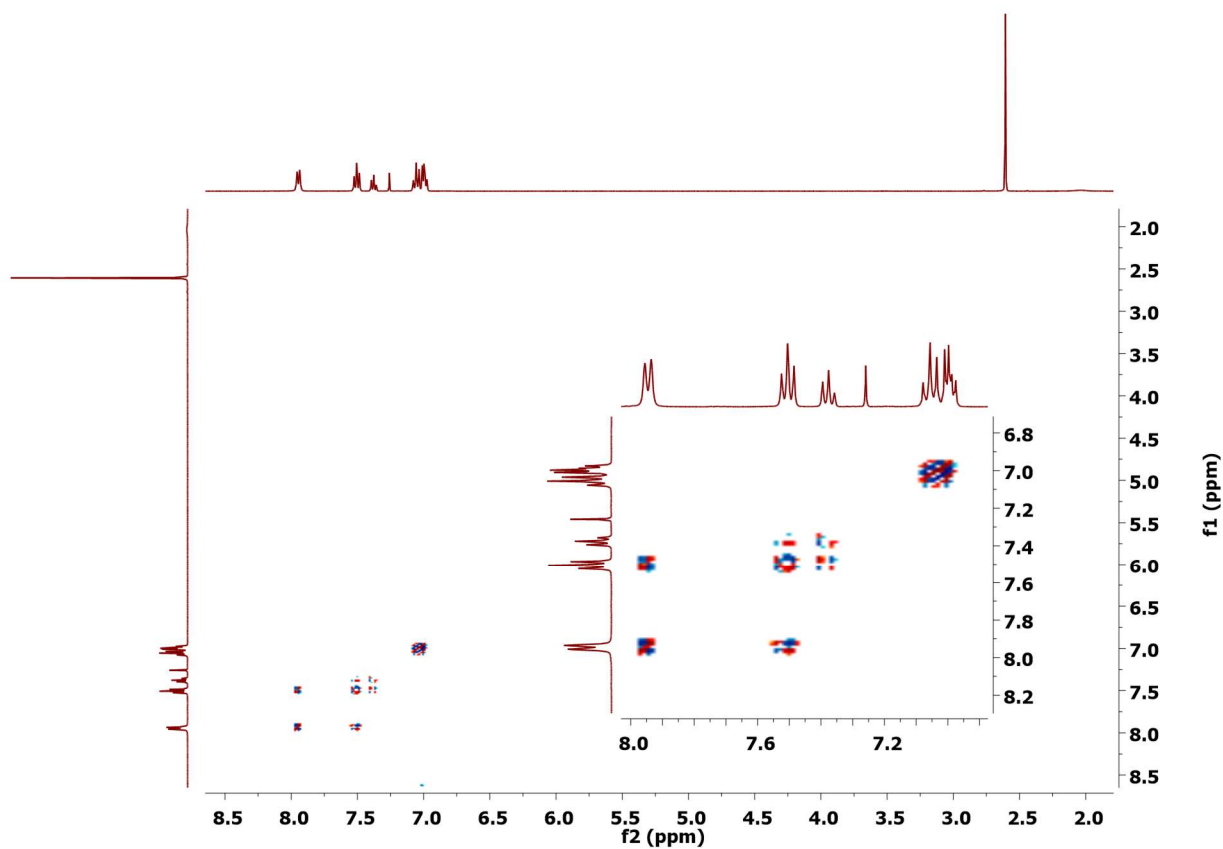

$^1\text{H}$ - $^{13}\text{C}$ -HSQC NMR ( $\text{CDCl}_3$ ) spectrum of (Z)-1-(5-((4-fluorophenyl)imino)-4-phenyl-4,5-dihydro-1,3,4-thiadiazol-2-yl)ethan-1-one

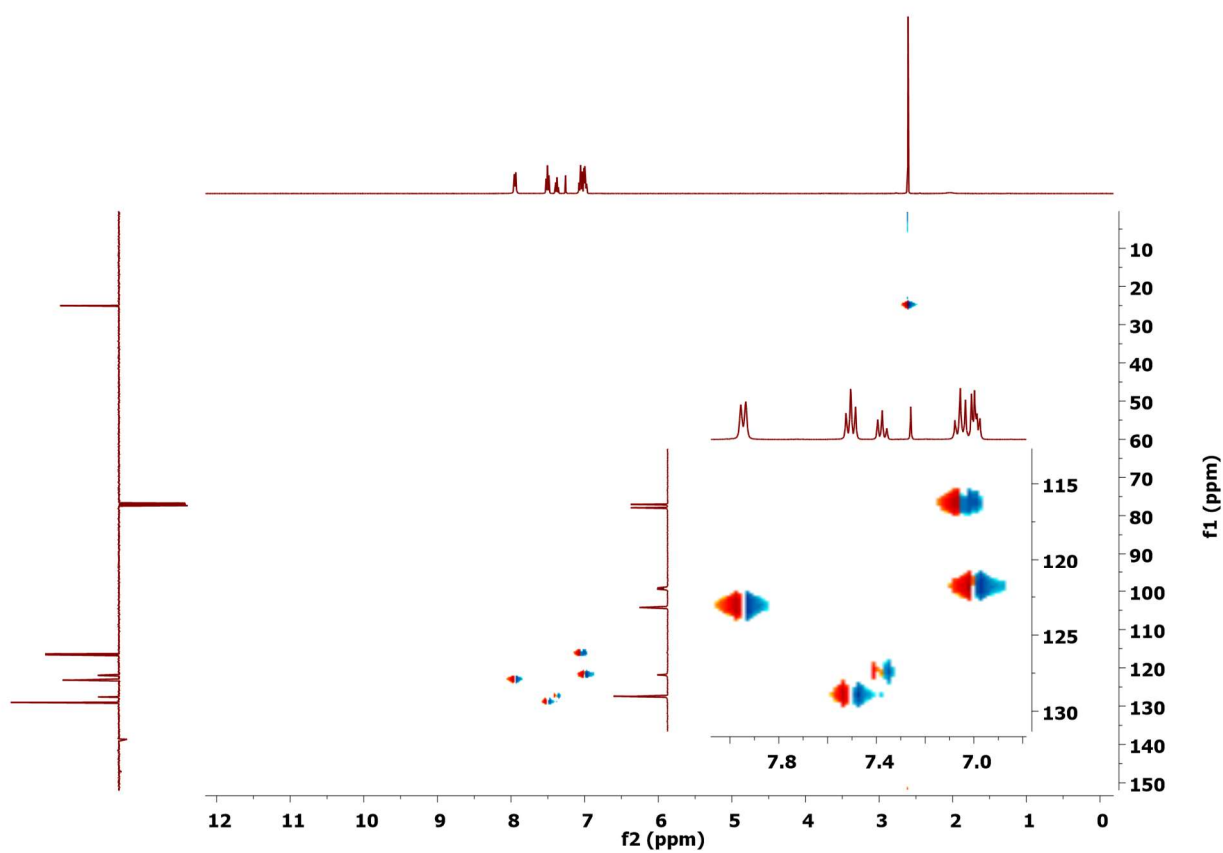

$^1\text{H}$ - $^{13}\text{C}$ -gHMBC NMR ( $\text{CDCl}_3$ ) spectrum of (Z)-1-(5-((4-fluorophenyl)imino)-4-phenyl-4,5-dihydro-1,3,4-thiadiazol-2-yl)ethan-1-one

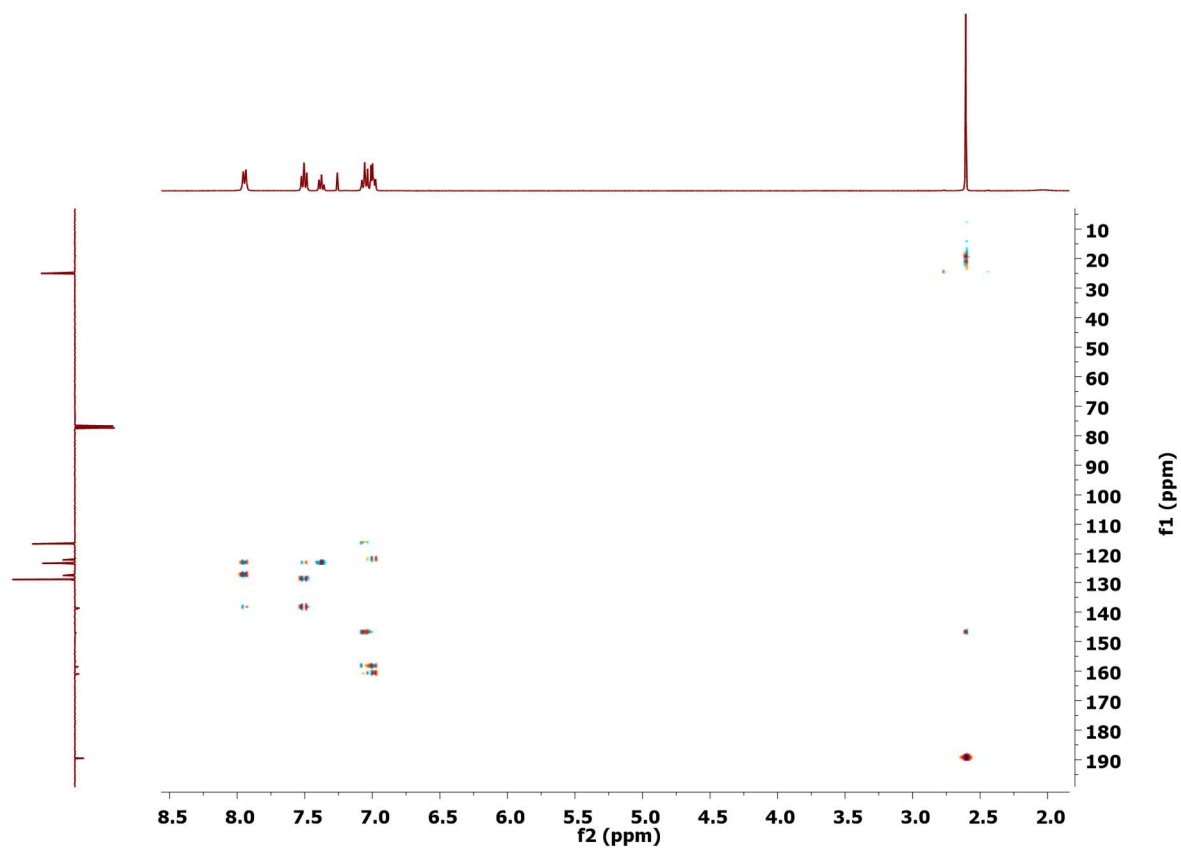

$^1\text{H}$  NMR ( $\text{CDCl}_3$ ) spectrum of (Z)-1-(5-((4-fluorophenyl)imino)-4-(p-tolyl)-4,5-dihydro-1,3,4-thiadiazol-2-yl)ethan-1-one

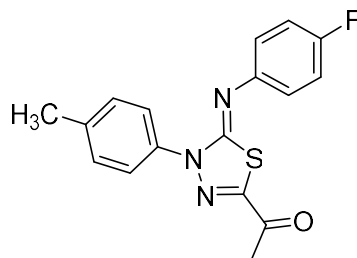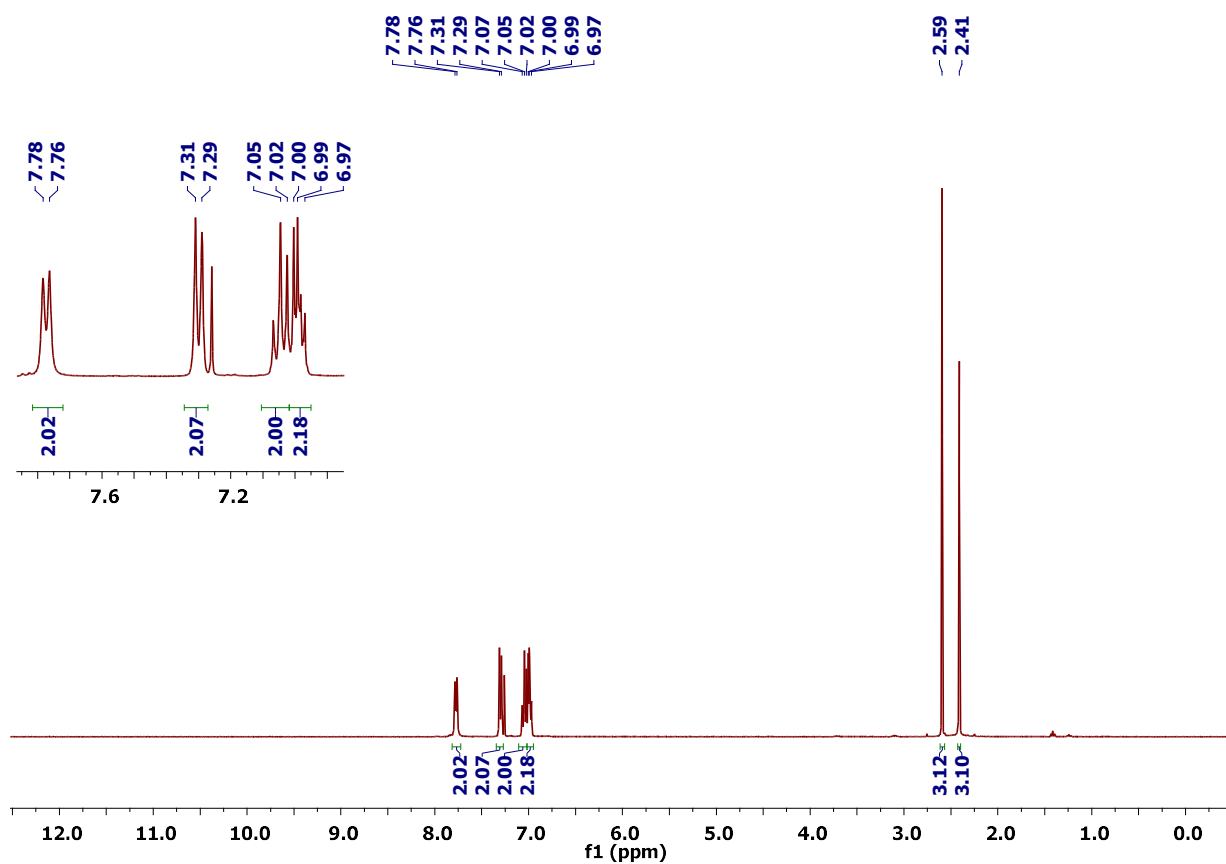

$^{13}\text{C}$  NMR ( $\text{CDCl}_3$ ) spectrum of (Z)-1-(5-((4-fluorophenyl)imino)-4-(p-tolyl)-4,5-dihydro-1,3,4-thiadiazol-2-yl)ethan-1-one

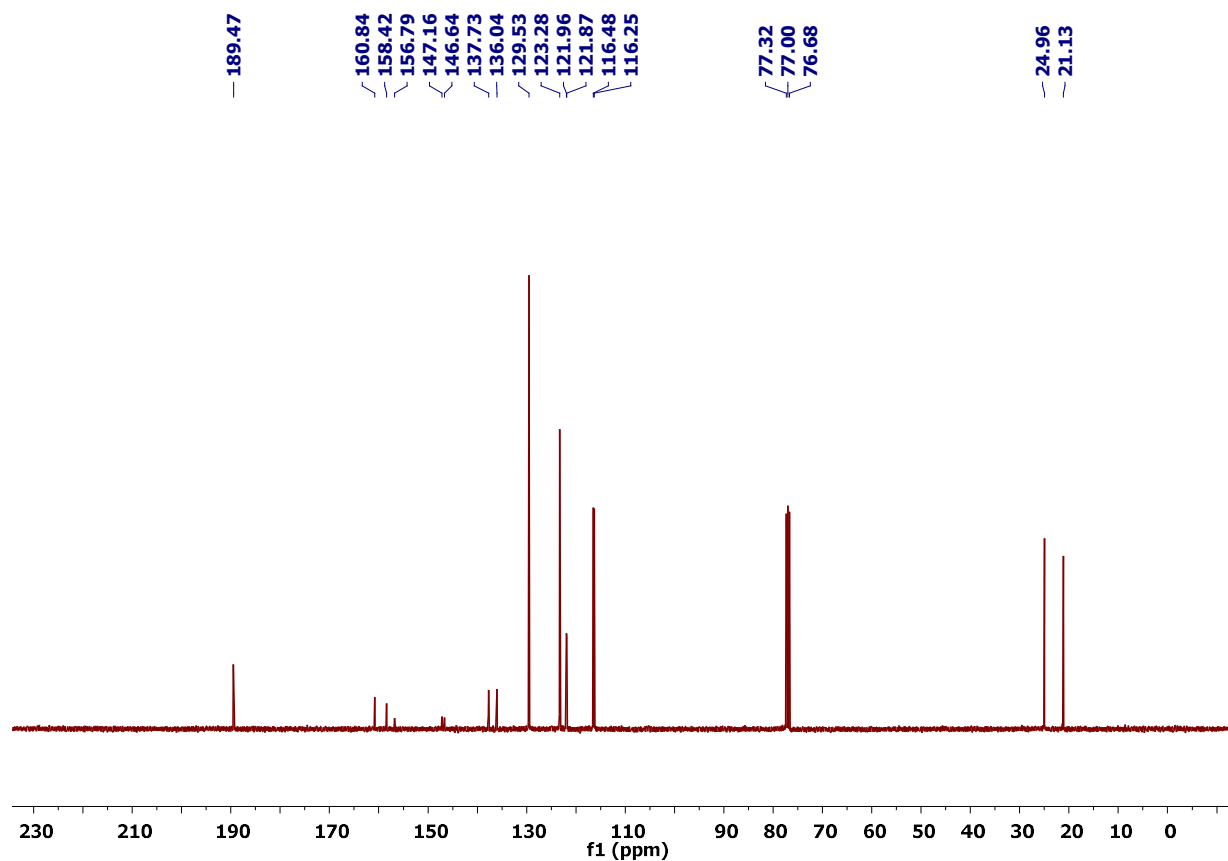

$^{13}\text{C}$  CRAPT NMR ( $\text{CDCl}_3$ ) spectrum of (Z)-1-(5-((4-fluorophenyl)imino)-4-(p-tolyl)-4,5-dihydro-1,3,4-thiadiazol-2-yl)ethan-1-one

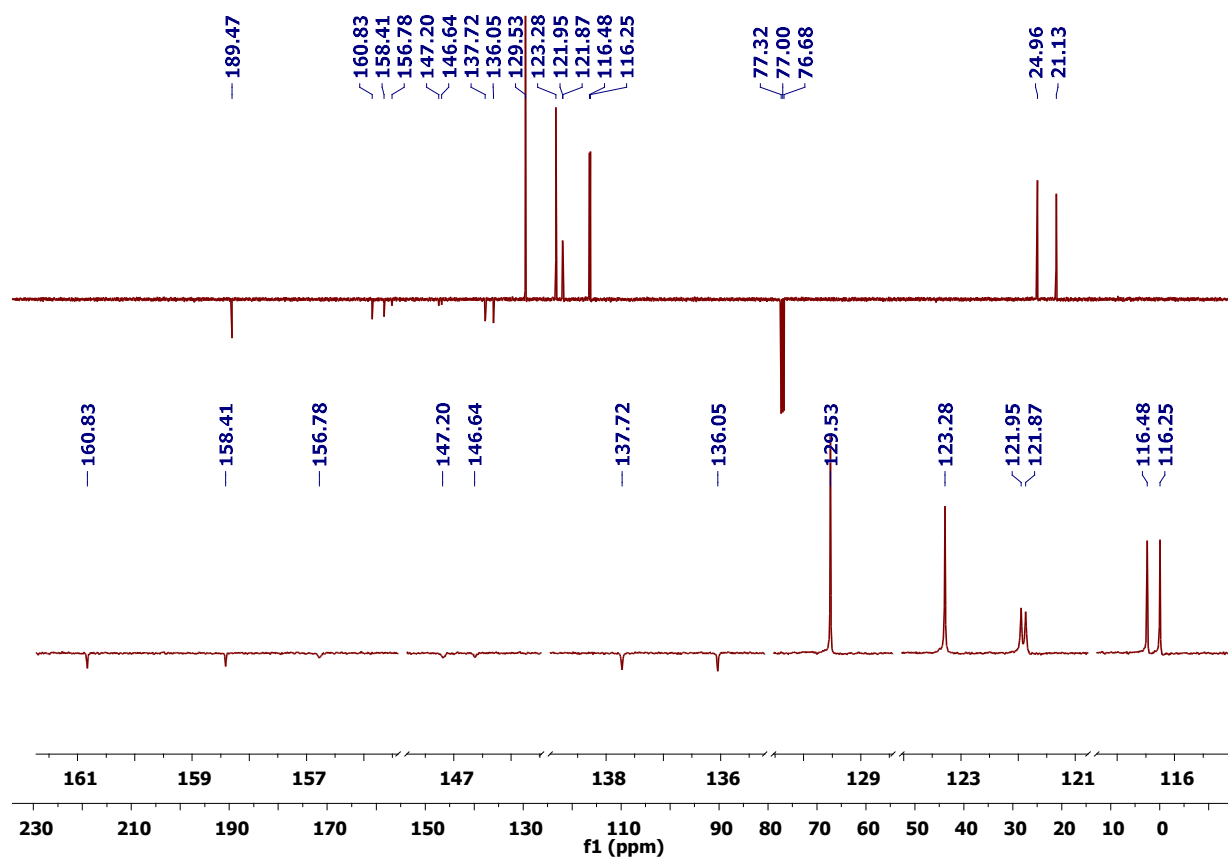



$^1\text{H}$ - $^1\text{H}$  gDQCOSY NMR ( $\text{CDCl}_3$ ) spectrum of (Z)-1-(5-((4-fluorophenyl)imino)-4-(p-tolyl)-4,5-dihydro-1,3,4-thiadiazol-2-yl)ethan-1-one

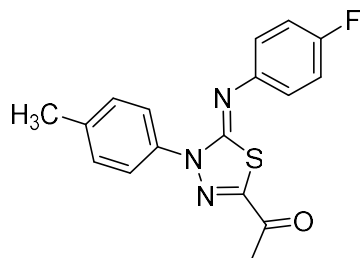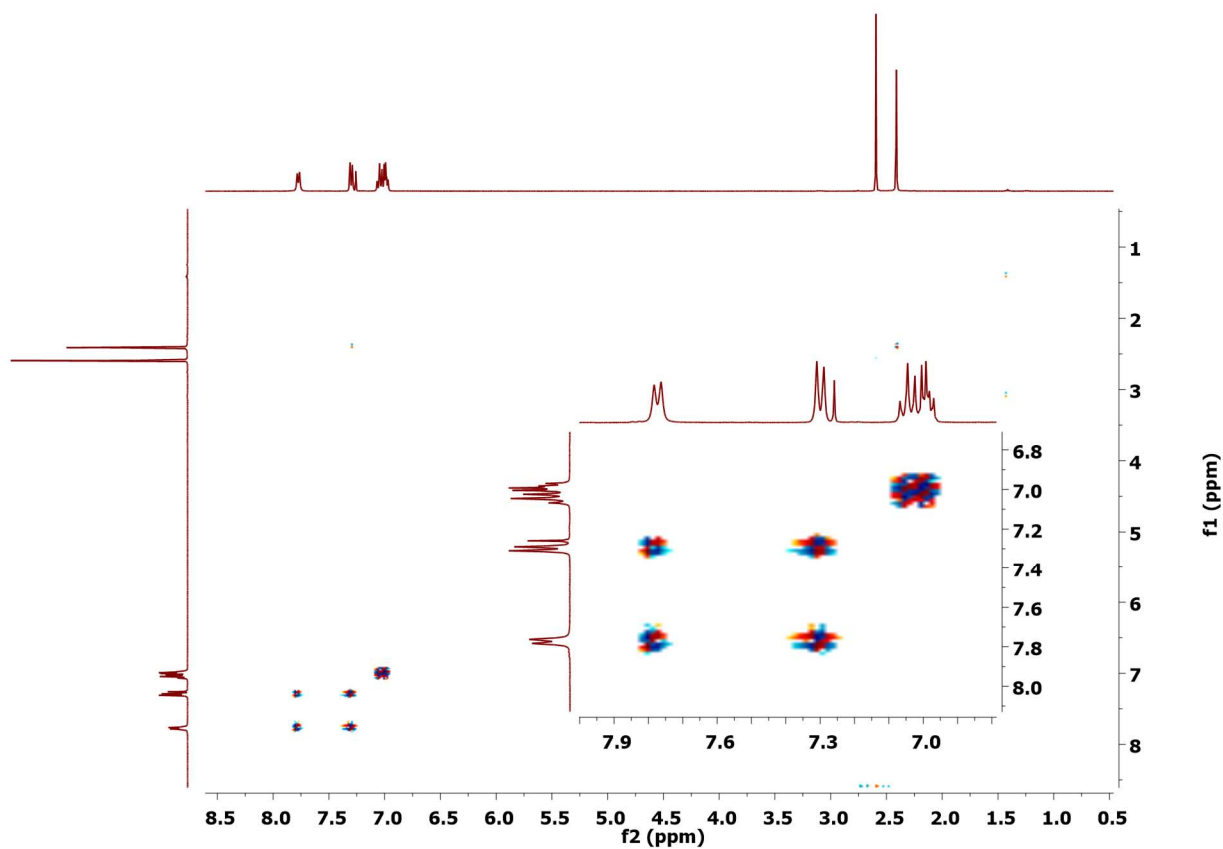

$^1\text{H}$ - $^{13}\text{C}$ -HSQC NMR ( $\text{CDCl}_3$ ) spectrum of (Z)-1-(5-((4-fluorophenyl)imino)-4-(p-tolyl)-4,5-dihydro-1,3,4-thiadiazol-2-yl)ethan-1-one

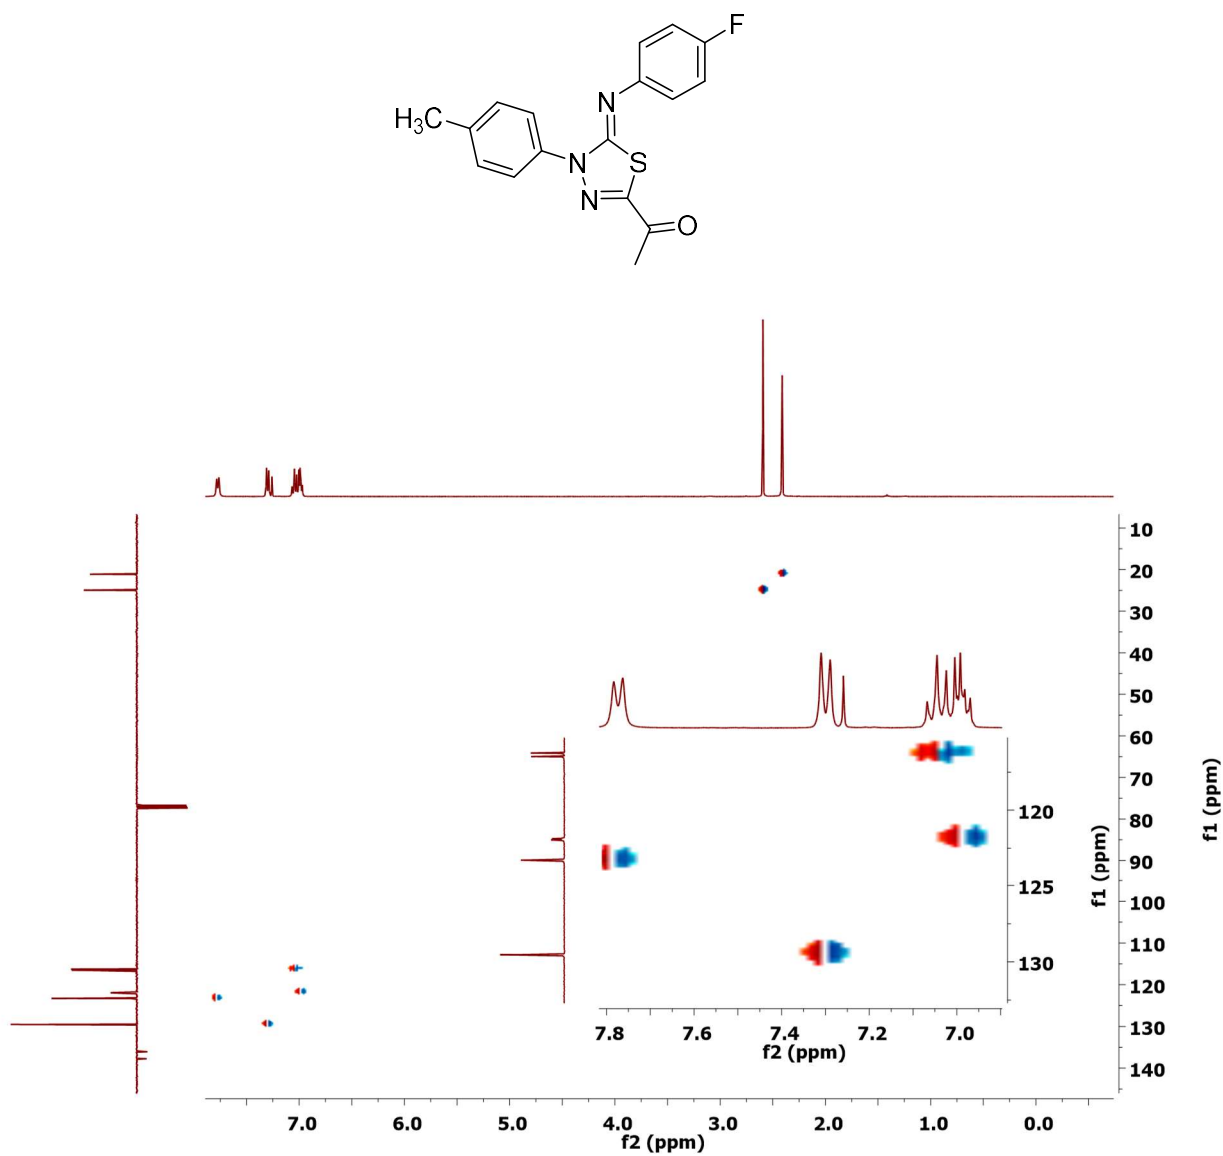

$^1\text{H}$ - $^{13}\text{C}$ -gHMBC NMR ( $\text{CDCl}_3$ ) spectrum of (Z)-1-(5-((4-fluorophenyl)imino)-4-(p-tolyl)-4,5-dihydro-1,3,4-thiadiazol-2-yl)ethan-1-one

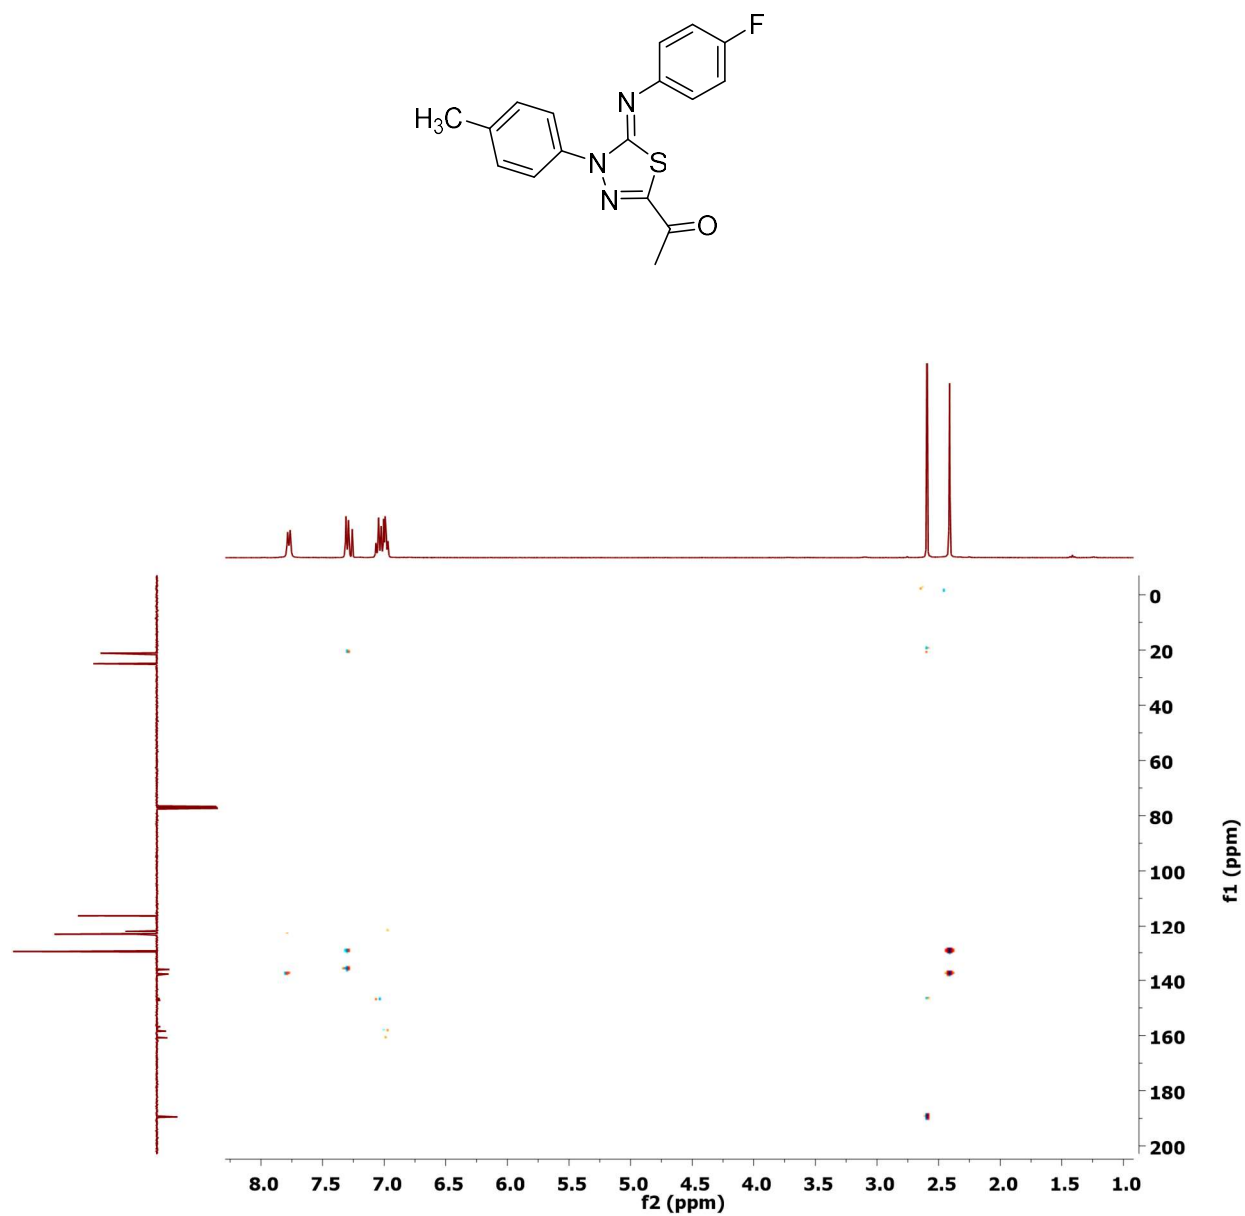

$^1\text{H}$  NMR ( $\text{CDCl}_3$ ) spectrum of (Z)-1-(5-((4-fluorophenyl)imino)-4-(4-(methylthio)phenyl)-4,5-dihydro-1,3,4-thiadiazol-2-yl)ethan-1-one

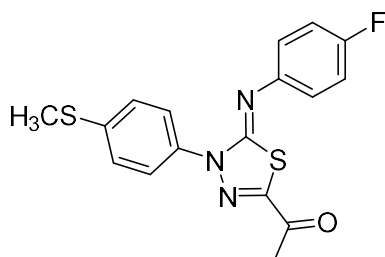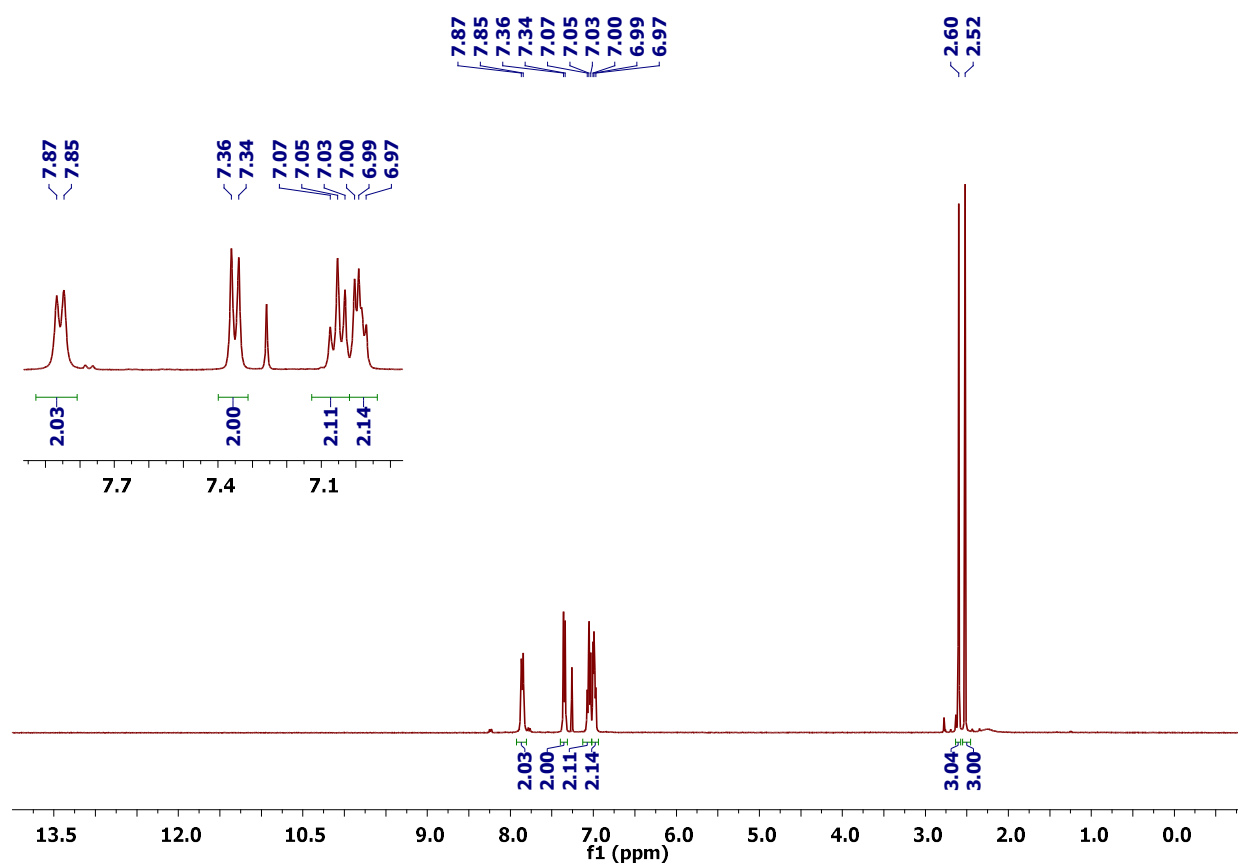

$^{13}\text{C}$  NMR ( $\text{CDCl}_3$ ) spectrum of (Z)-1-(5-((4-fluorophenyl)imino)-4-(4-(methylthio)phenyl)-4,5-dihydro-1,3,4-thiadiazol-2-yl)ethan-1-one

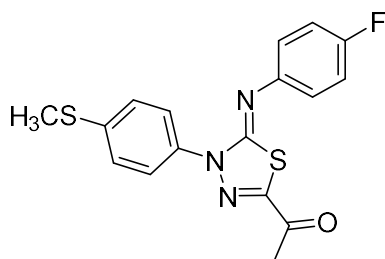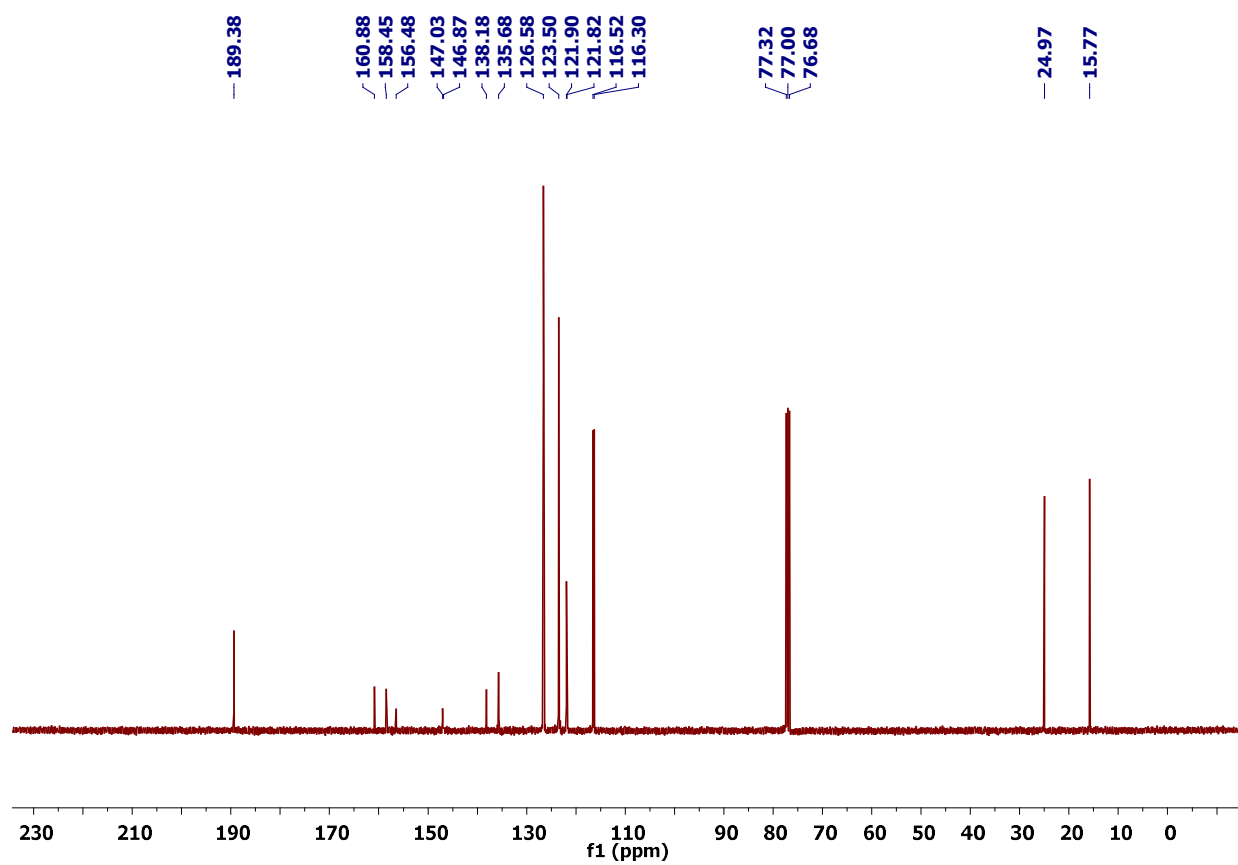

$^{13}\text{C}$  CRAPT NMR ( $\text{CDCl}_3$ ) spectrum of (Z)-1-(5-((4-fluorophenyl)imino)-4-(4-(methylthio)phenyl)-4,5-dihydro-1,3,4-thiadiazol-2-yl)ethan-1-one

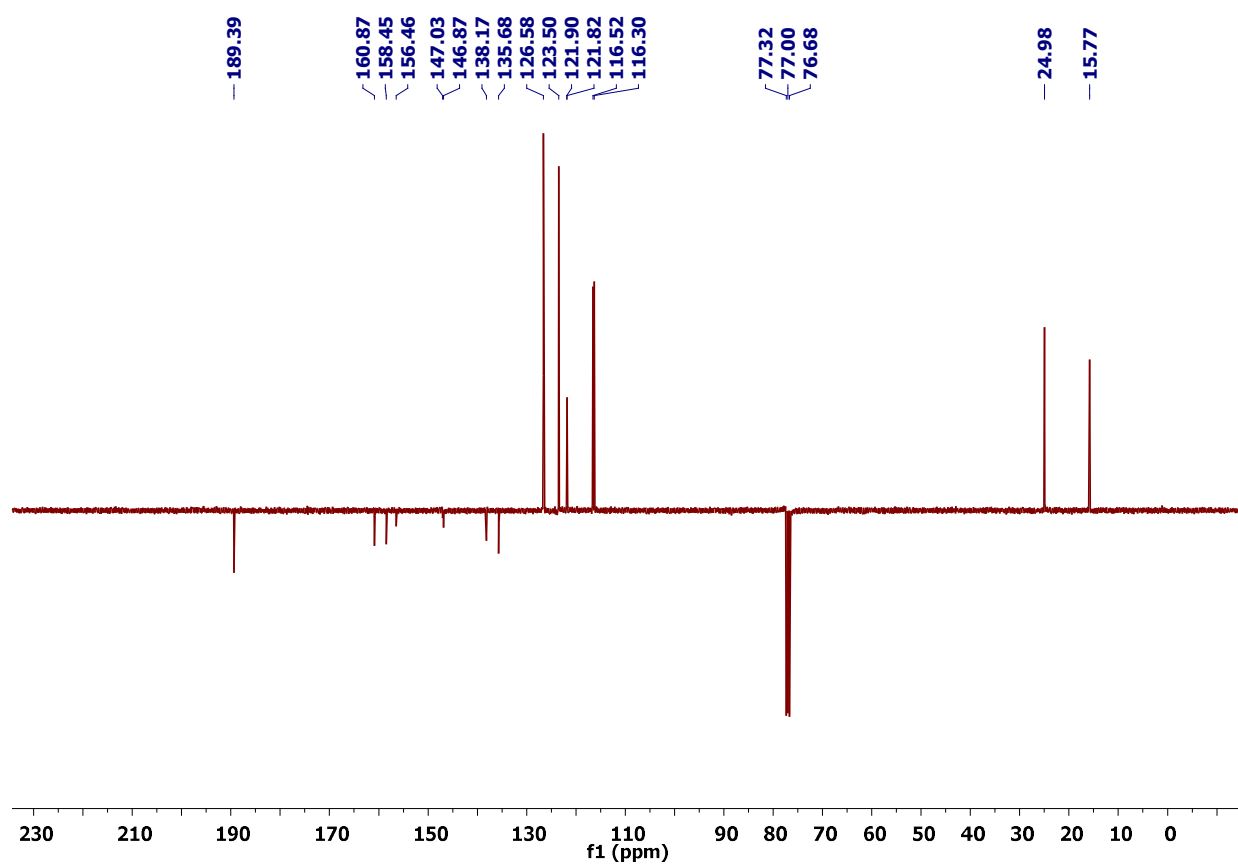

$^1\text{H}$ - $^1\text{H}$  gDQCOSY NMR ( $\text{CDCl}_3$ ) spectrum of (Z)-1-(5-((4-fluorophenyl)imino)-4-(4-(methylthio)phenyl)-4,5-dihydro-1,3,4-thiadiazol-2-yl)ethan-1-one

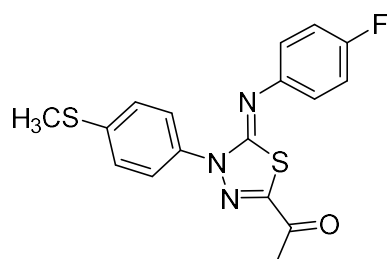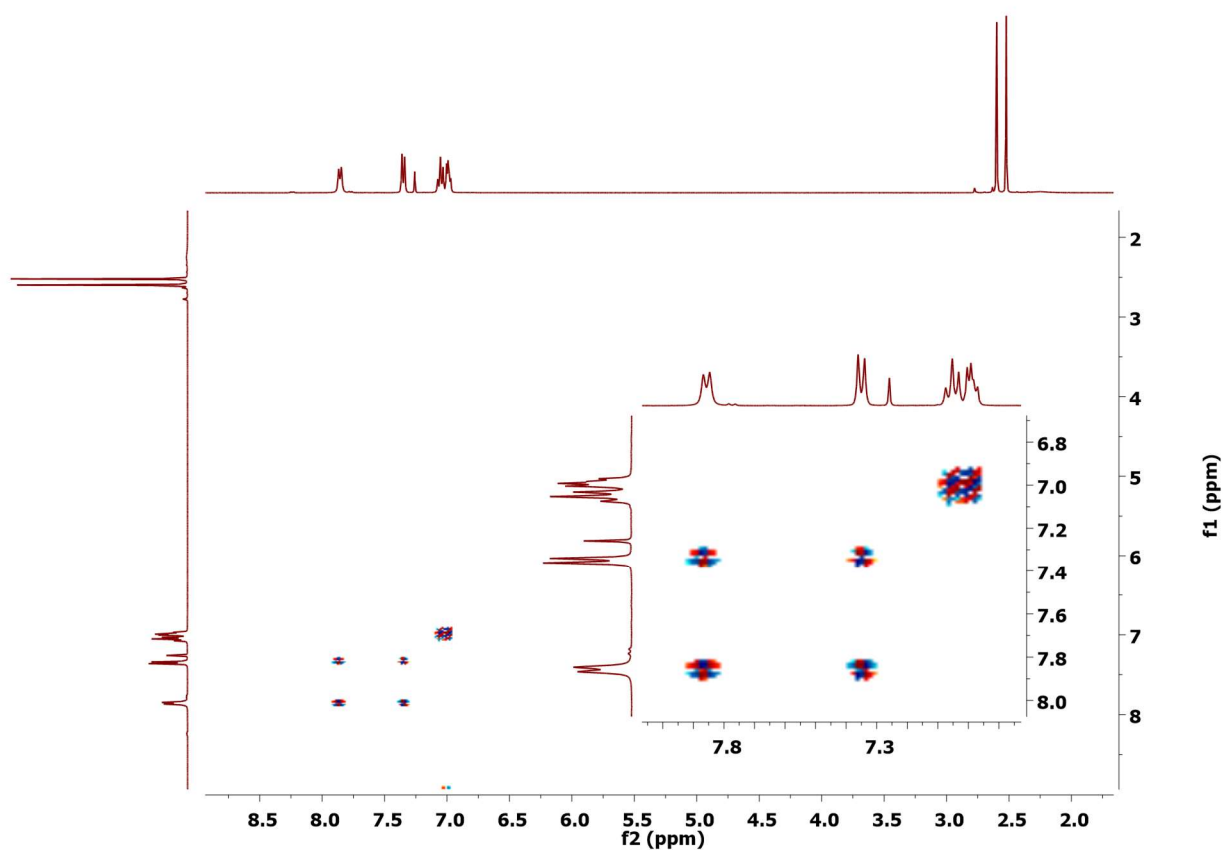

$^1\text{H}$ - $^{13}\text{C}$ -HSQC NMR ( $\text{CDCl}_3$ ) spectrum of (Z)-1-(5-((4-fluorophenyl)imino)-4-(4-(methylthio)phenyl)-4,5-dihydro-1,3,4-thiadiazol-2-yl)ethan-1-one

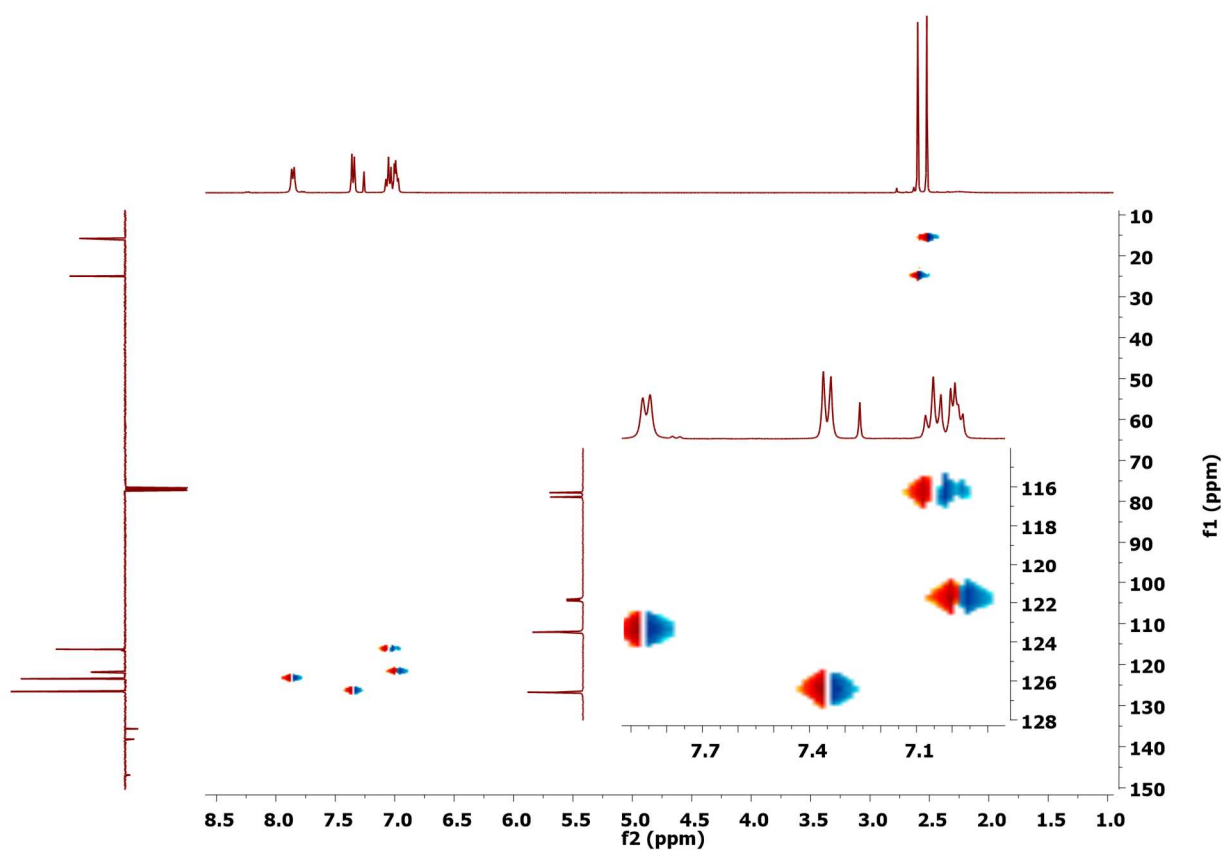



$^1\text{H}$ - $^{13}\text{C}$ -gHMBC NMR ( $\text{CDCl}_3$ ) spectrum of (Z)-1-(5-((4-fluorophenyl)imino)-4-(4-(methylthio)phenyl)-4,5-dihydro-1,3,4-thiadiazol-2-yl)ethan-1-one

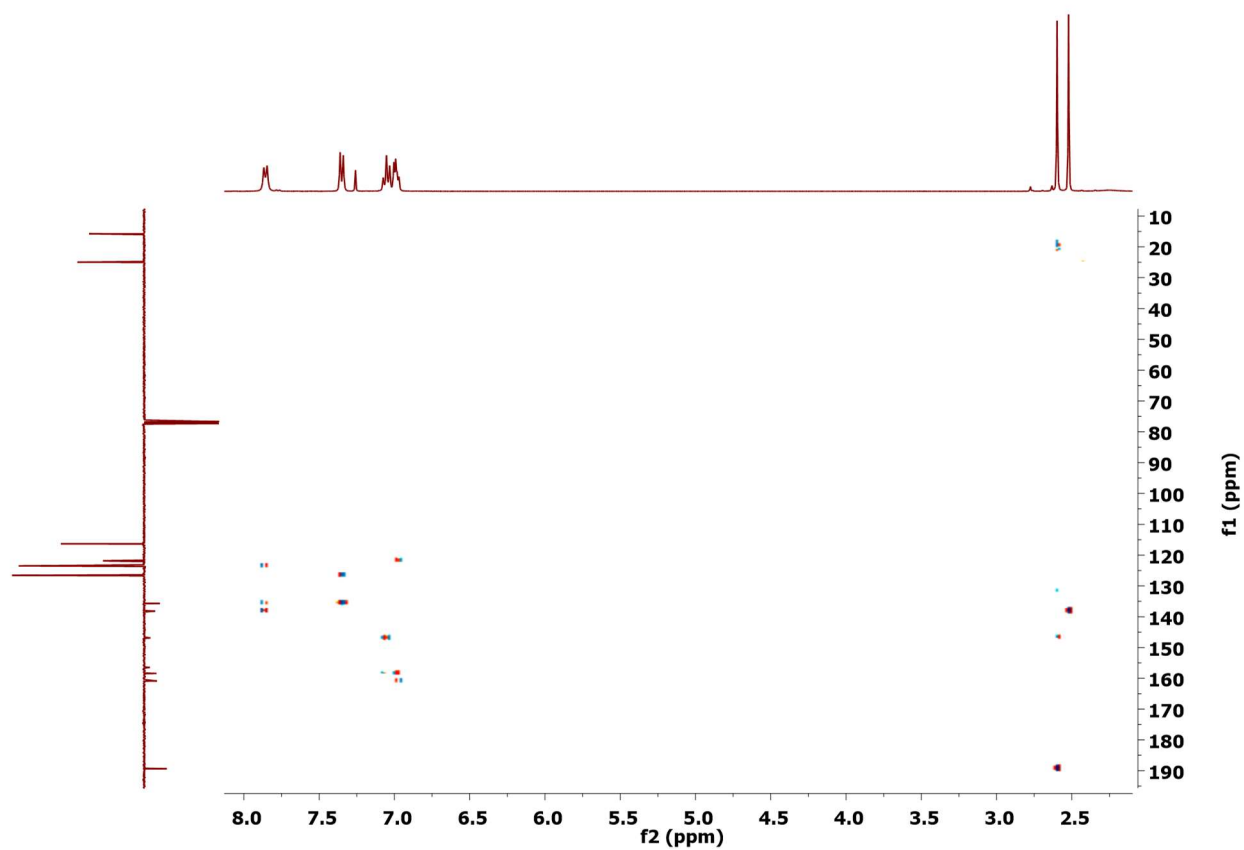

$^1\text{H}$  NMR ( $\text{CDCl}_3$ ) spectrum of (Z)-1-(5-((4-fluorophenyl)imino)-4-(4-methoxyphenyl)-4,5-dihydro-1,3,4-thiadiazol-2-yl)ethan-1-one

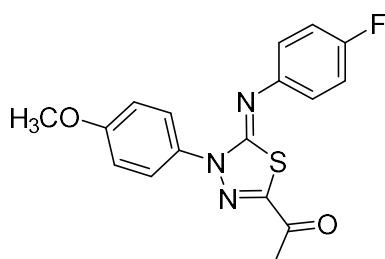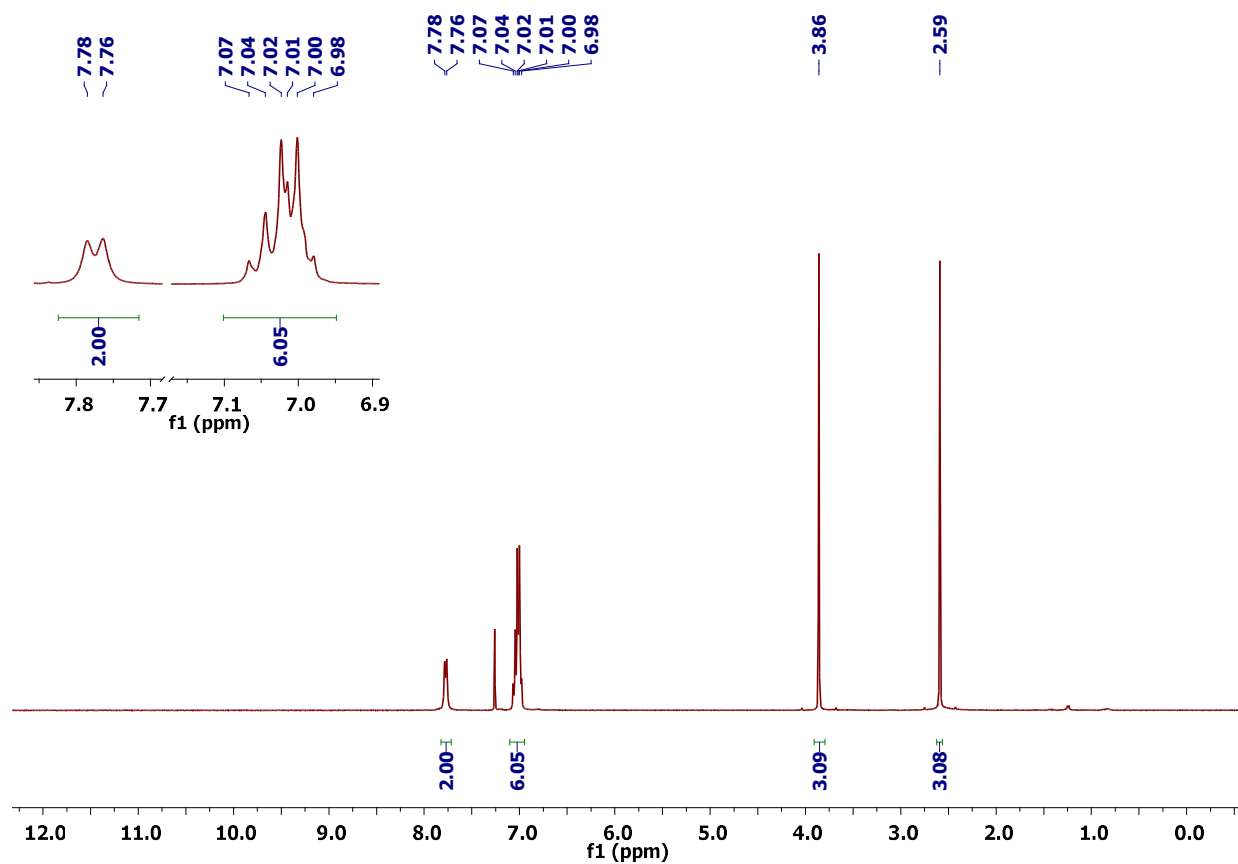

$^{13}\text{C}$  NMR ( $\text{CDCl}_3$ ) spectrum of (Z)-1-(5-((4-fluorophenyl)imino)-4-(4-methoxyphenyl)-4,5-dihydro-1,3,4-thiadiazol-2-yl)ethan-1-one

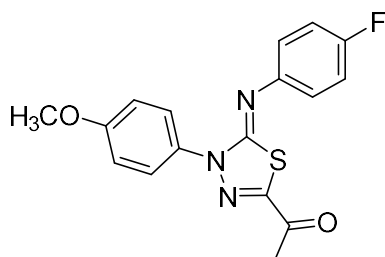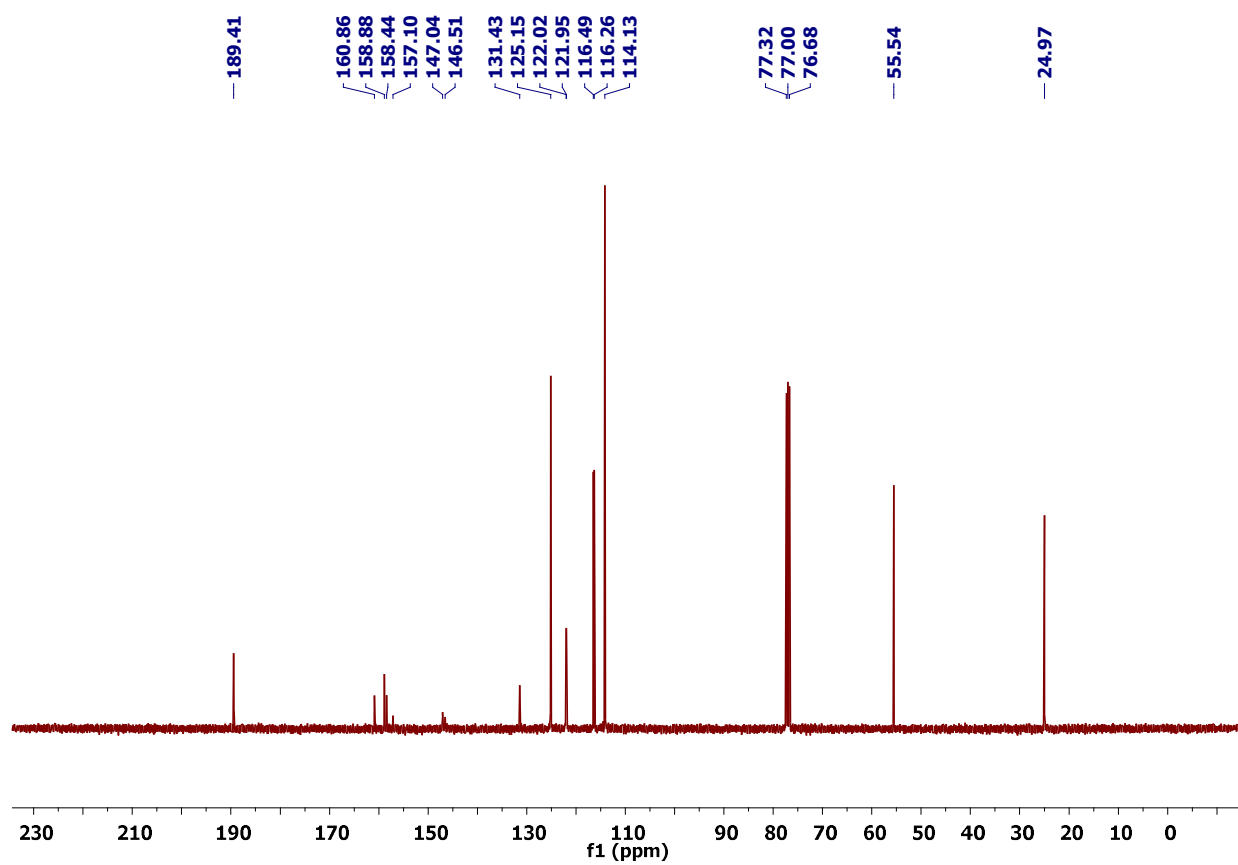

$^{13}\text{C}$  CRAPT NMR ( $\text{CDCl}_3$ ) spectrum of (Z)-1-(5-((4-fluorophenyl)imino)-4-(4-methoxyphenyl)-4,5-dihydro-1,3,4-thiadiazol-2-yl)ethan-1-one

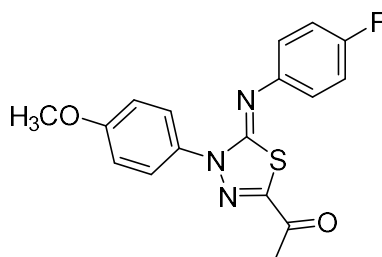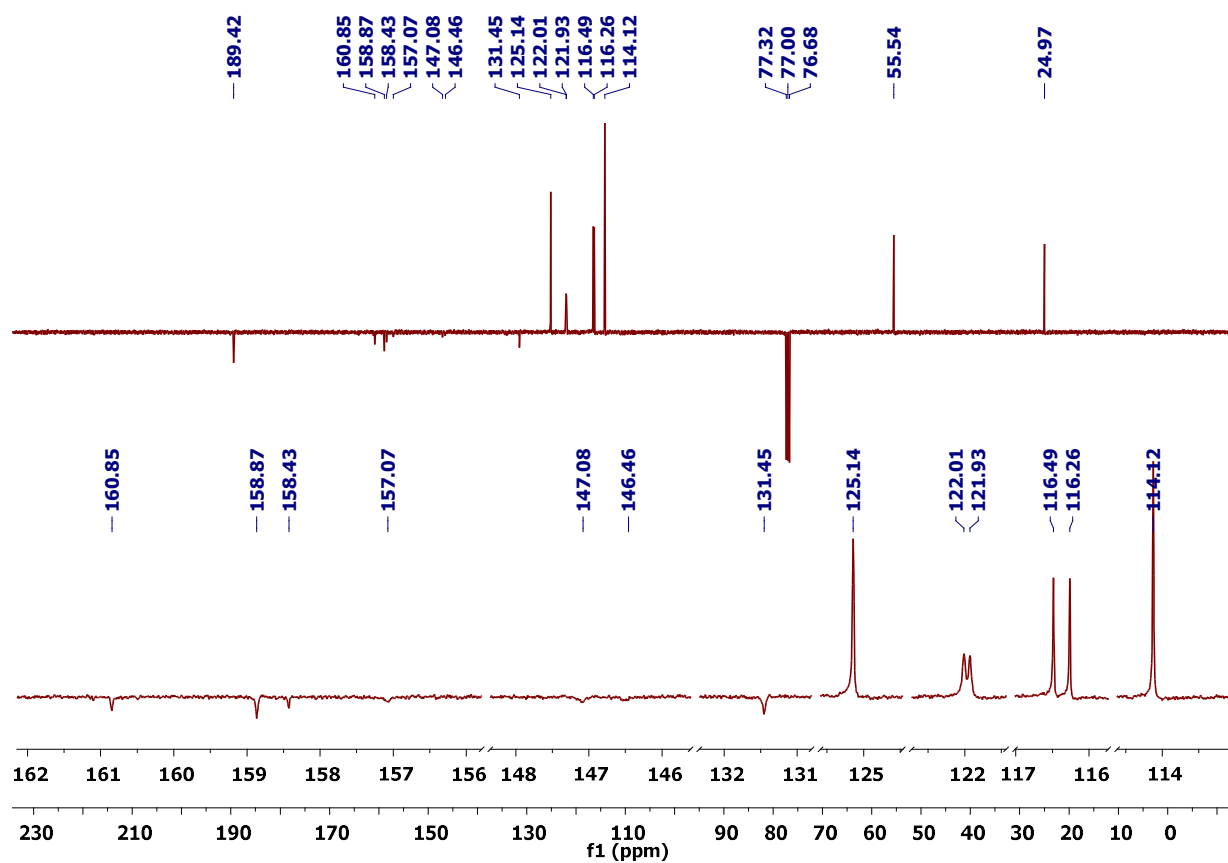

$^1\text{H}$ - $^1\text{H}$  gDQCOSY NMR ( $\text{CDCl}_3$ ) spectrum of (Z)-1-(5-((4-fluorophenyl)imino)-4-(4-methoxyphenyl)-4,5-dihydro-1,3,4-thiadiazol-2-yl)ethan-1-one

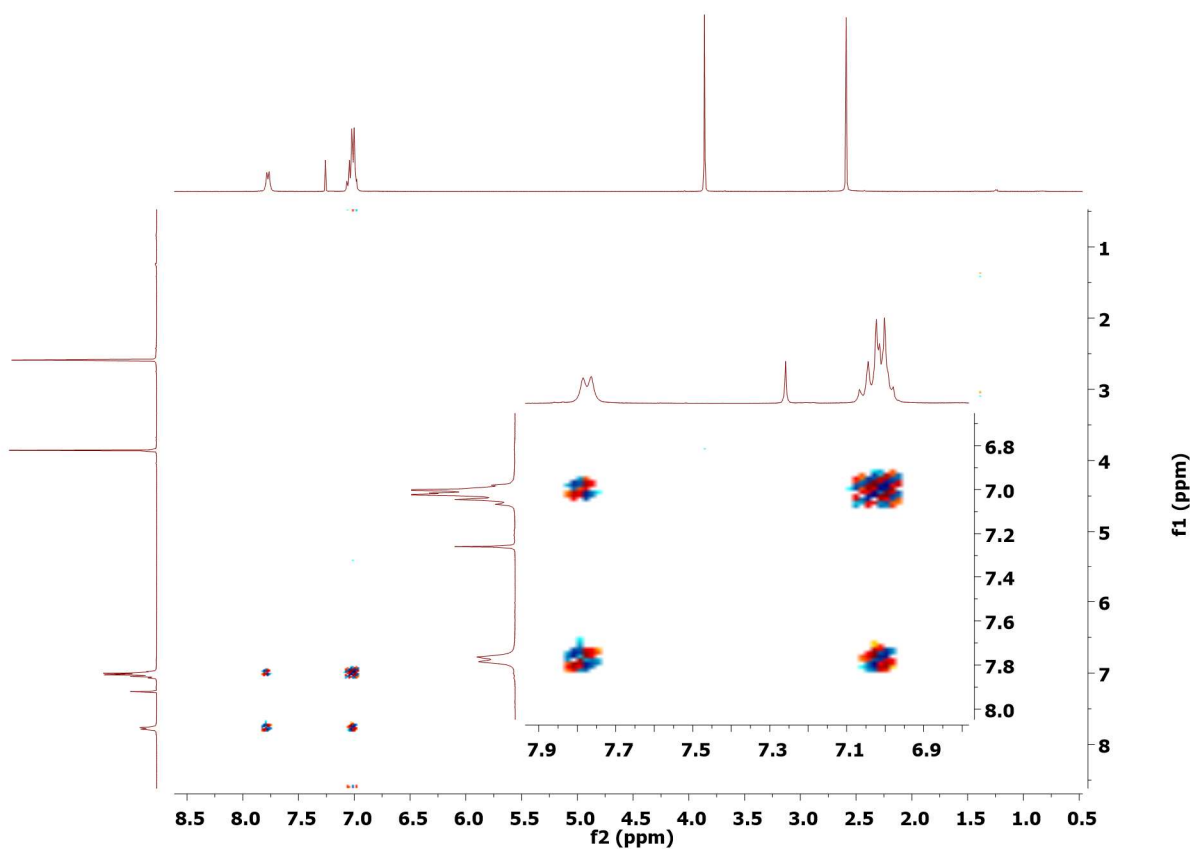

$^1\text{H}$ - $^{13}\text{C}$ -HSQC NMR ( $\text{CDCl}_3$ ) spectrum of (Z)-1-(5-((4-fluorophenyl)imino)-4-(4-methoxyphenyl)-4,5-dihydro-1,3,4-thiadiazol-2-yl)ethan-1-one

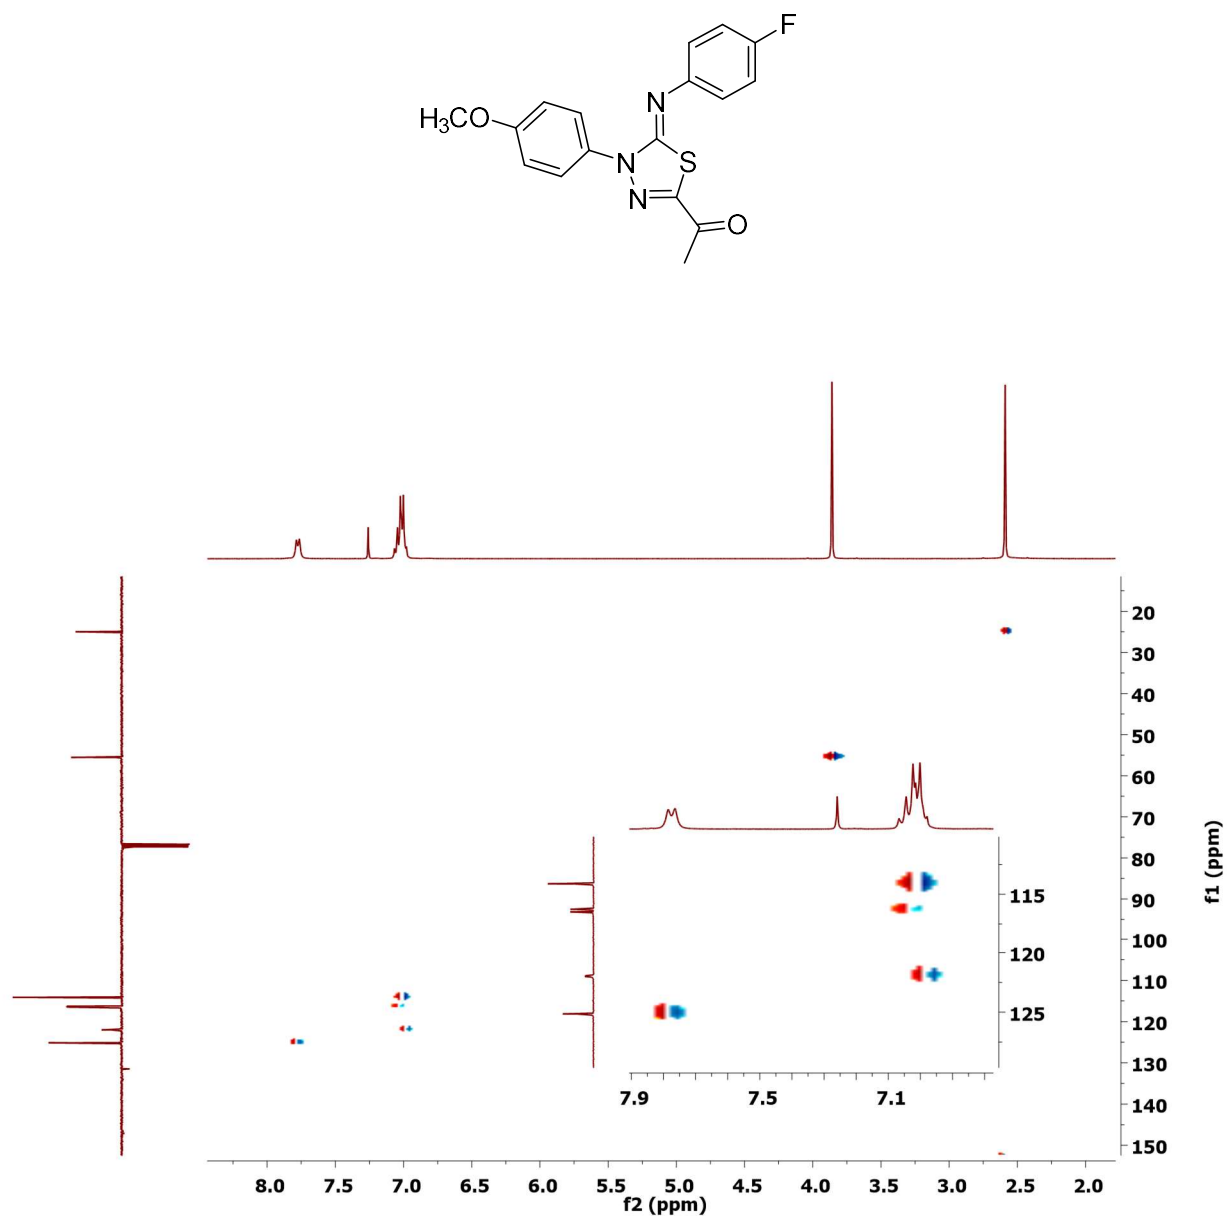

$^1\text{H}$ - $^{13}\text{C}$ -gHMBC NMR ( $\text{CDCl}_3$ ) spectrum of (Z)-1-(5-((4-fluorophenyl)imino)-4-(4-methoxyphenyl)-4,5-dihydro-1,3,4-thiadiazol-2-yl)ethan-1-one

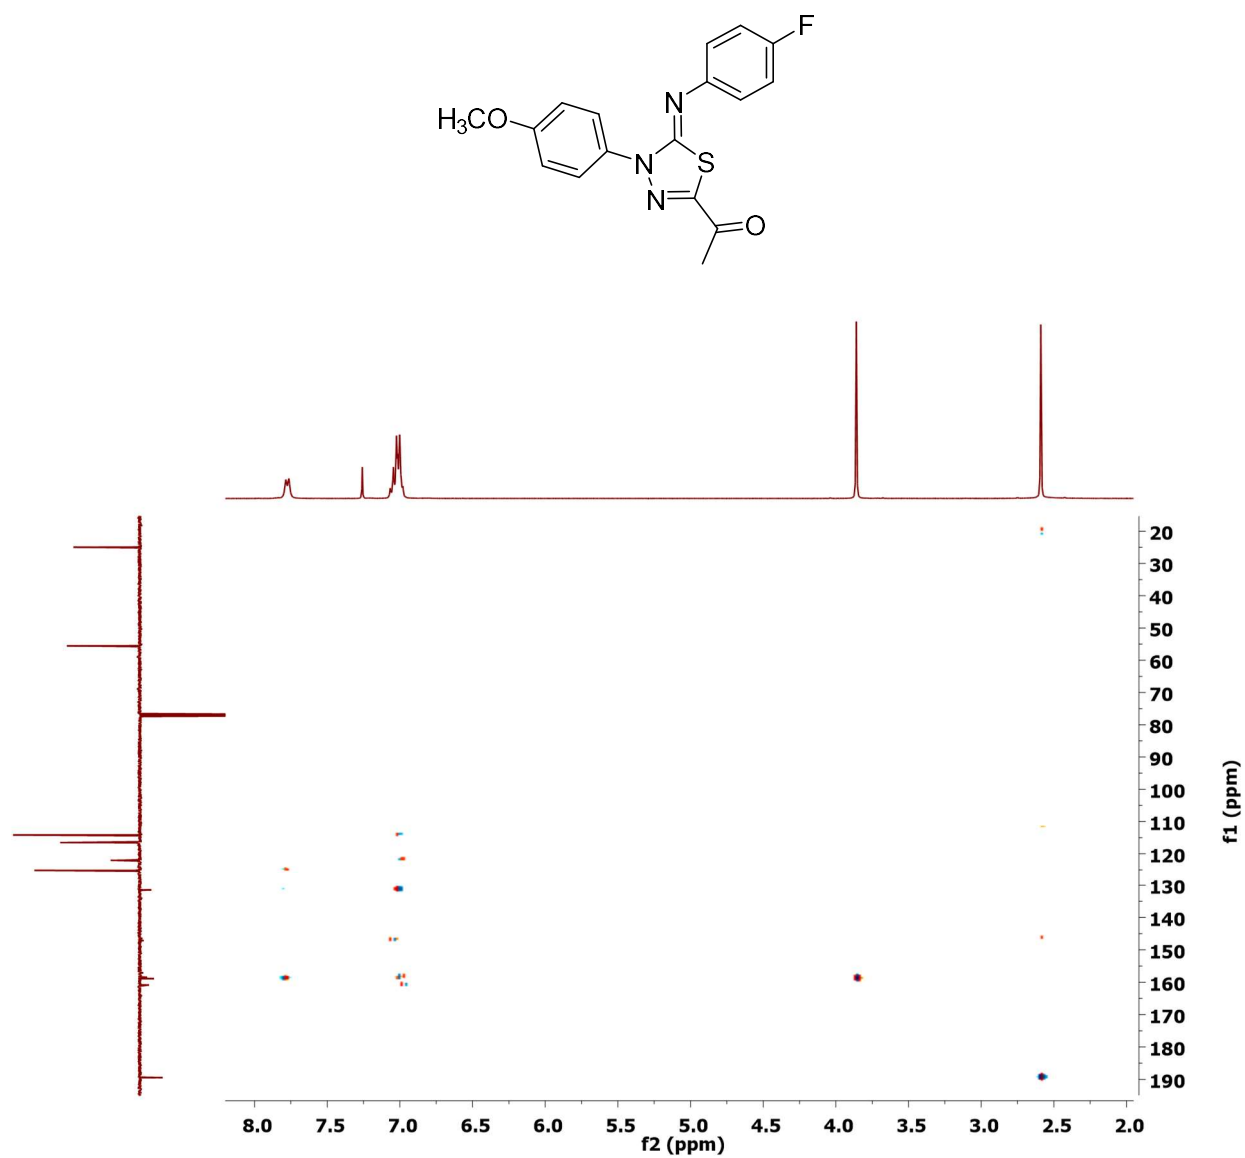

$^1\text{H}$  NMR ( $\text{CDCl}_3$ ) spectrum of (Z)-1-(5-((4-fluorophenyl)imino)-4-(m-tolyl)-4,5-dihydro-1,3,4-thiadiazol-2-yl)ethan-1-one

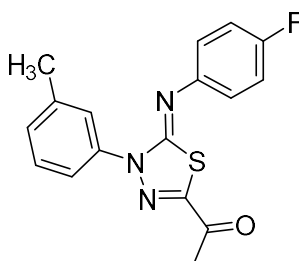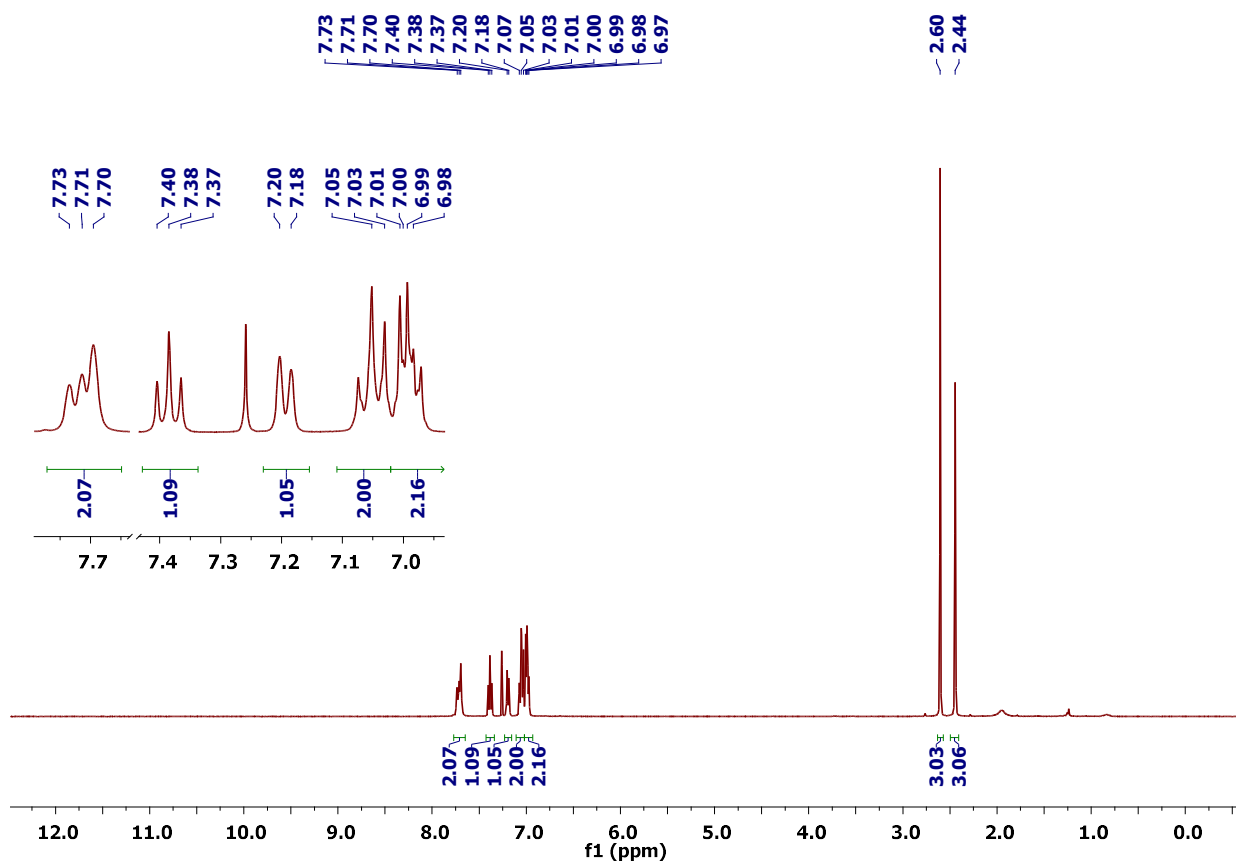



$^{13}\text{C}$  NMR ( $\text{CDCl}_3$ ) spectrum of (Z)-1-(5-((4-fluorophenyl)imino)-4-(m-tolyl)-4,5-dihydro-1,3,4-thiadiazol-2-yl)ethan-1-one

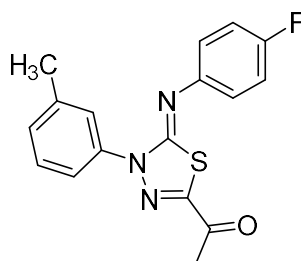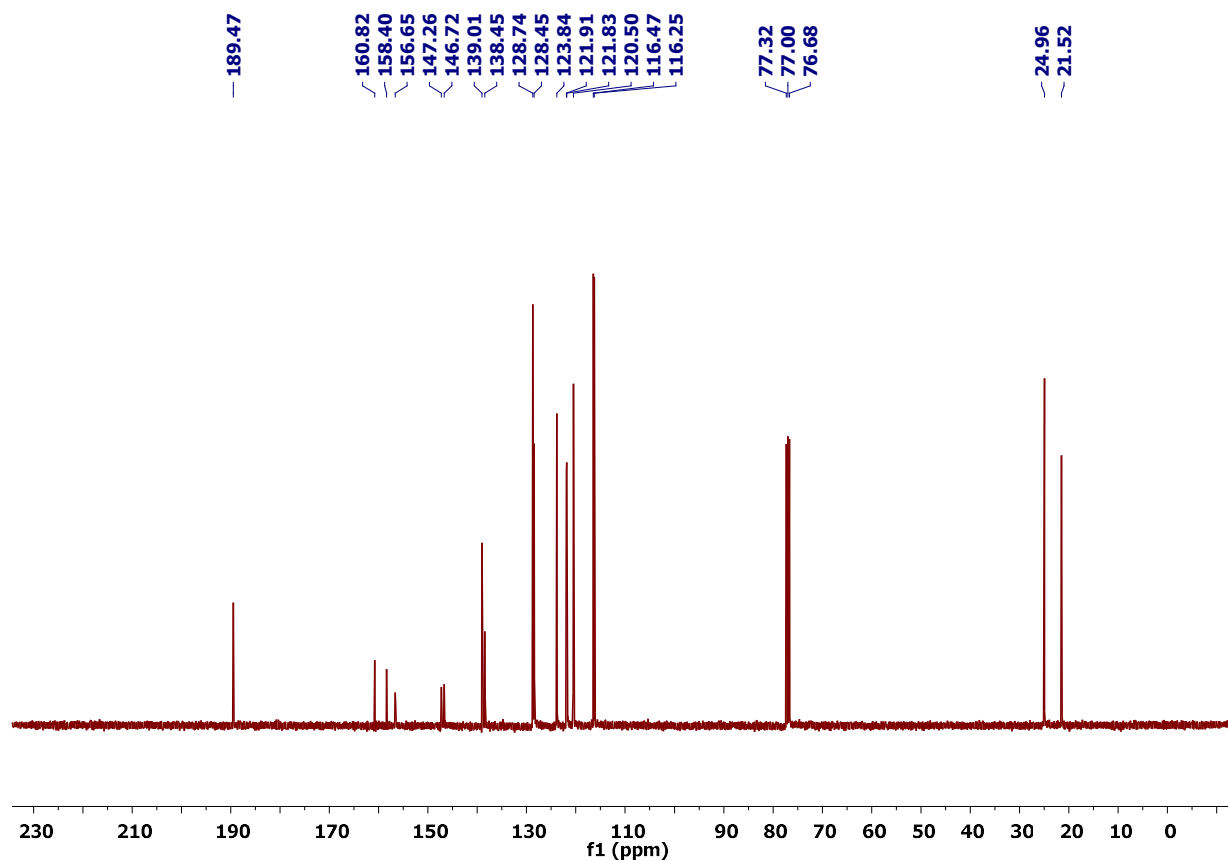

$^{13}\text{C}$  CRAPT NMR ( $\text{CDCl}_3$ ) spectrum of (Z)-1-(5-((4-fluorophenyl)imino)-4-(m-tolyl)-4,5-dihydro-1,3,4-thiadiazol-2-yl)ethan-1-one

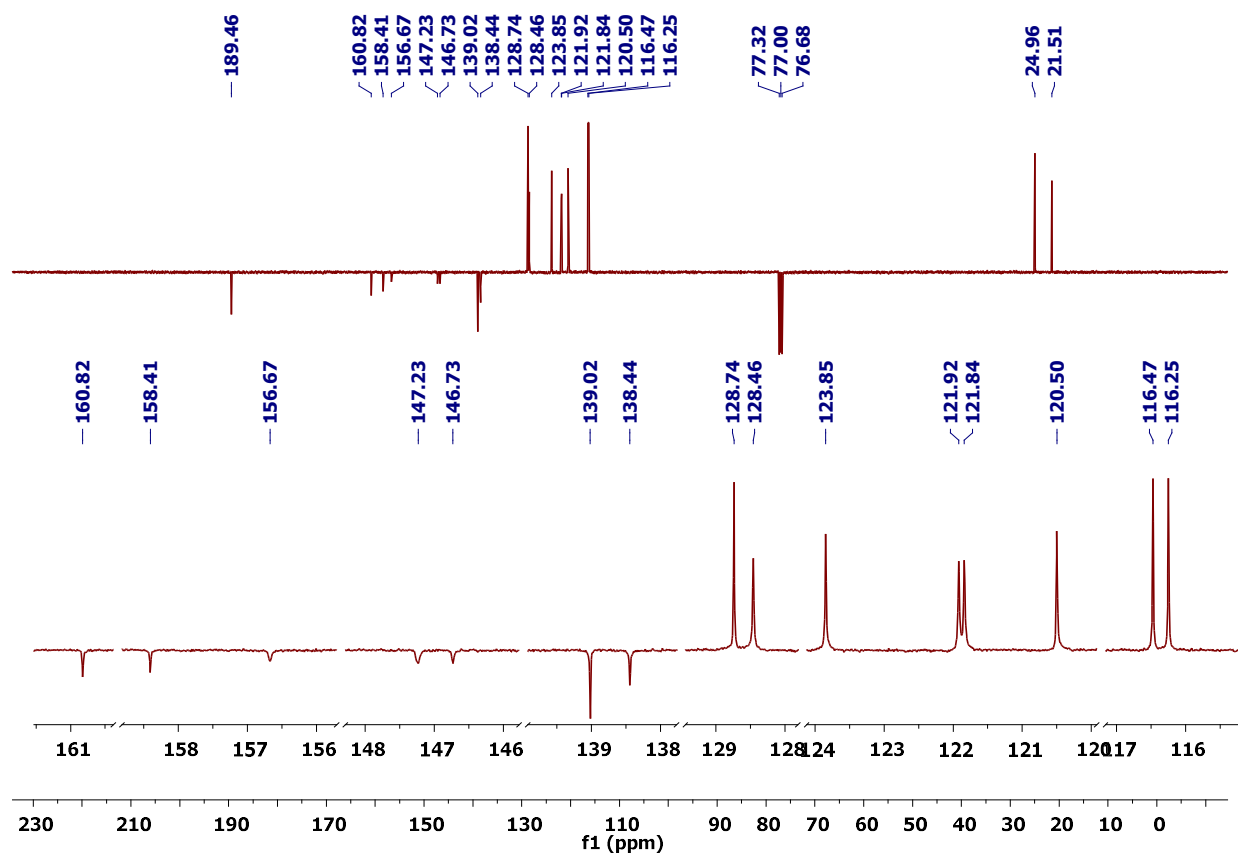

$^1\text{H}$ - $^1\text{H}$  gDQCOSY NMR ( $\text{CDCl}_3$ ) spectrum of (Z)-1-(5-((4-fluorophenyl)imino)-4-(m-tolyl)-4,5-dihydro-1,3,4-thiadiazol-2-yl)ethan-1-one

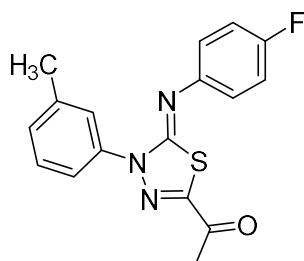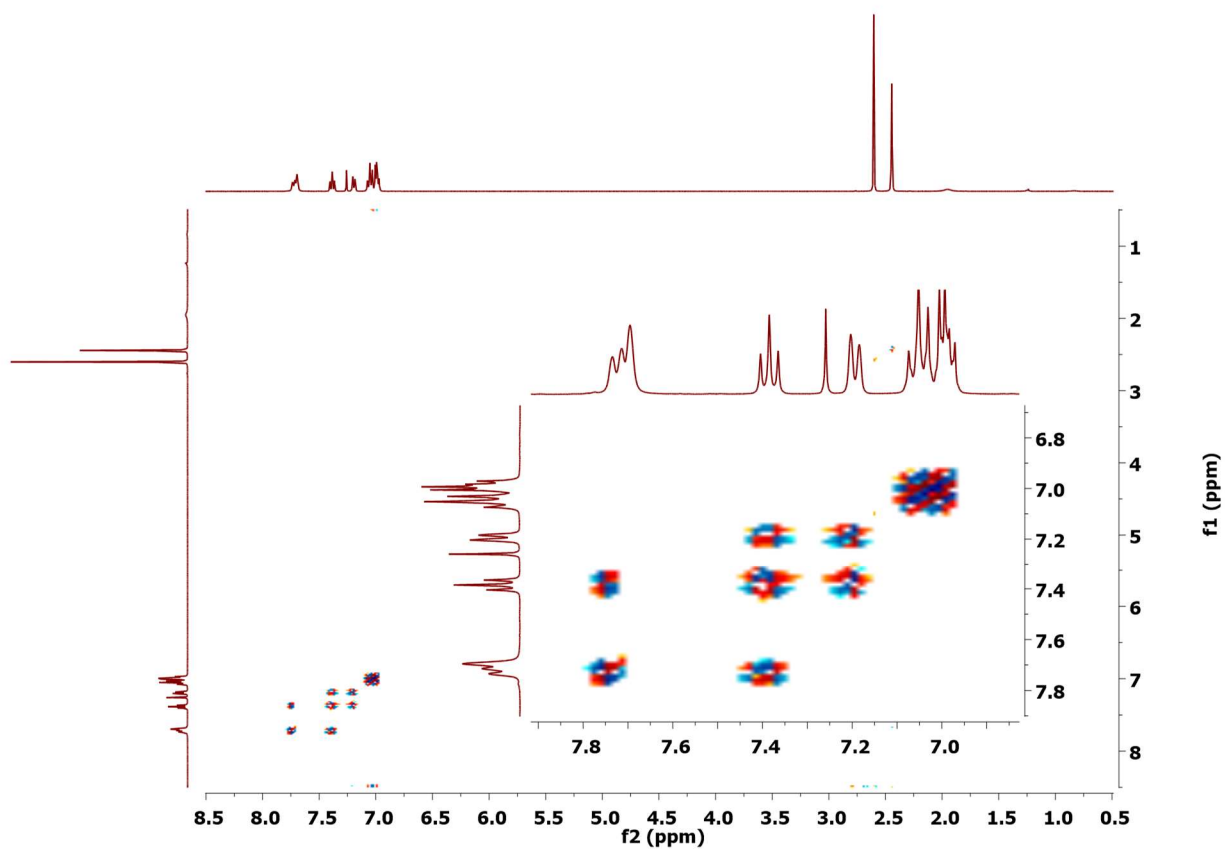

$^1\text{H}$ - $^{13}\text{C}$ -HSQC NMR ( $\text{CDCl}_3$ ) spectrum of (Z)-1-(5-((4-fluorophenyl)imino)-4-(m-tolyl)-4,5-dihydro-1,3,4-thiadiazol-2-yl)ethan-1-one

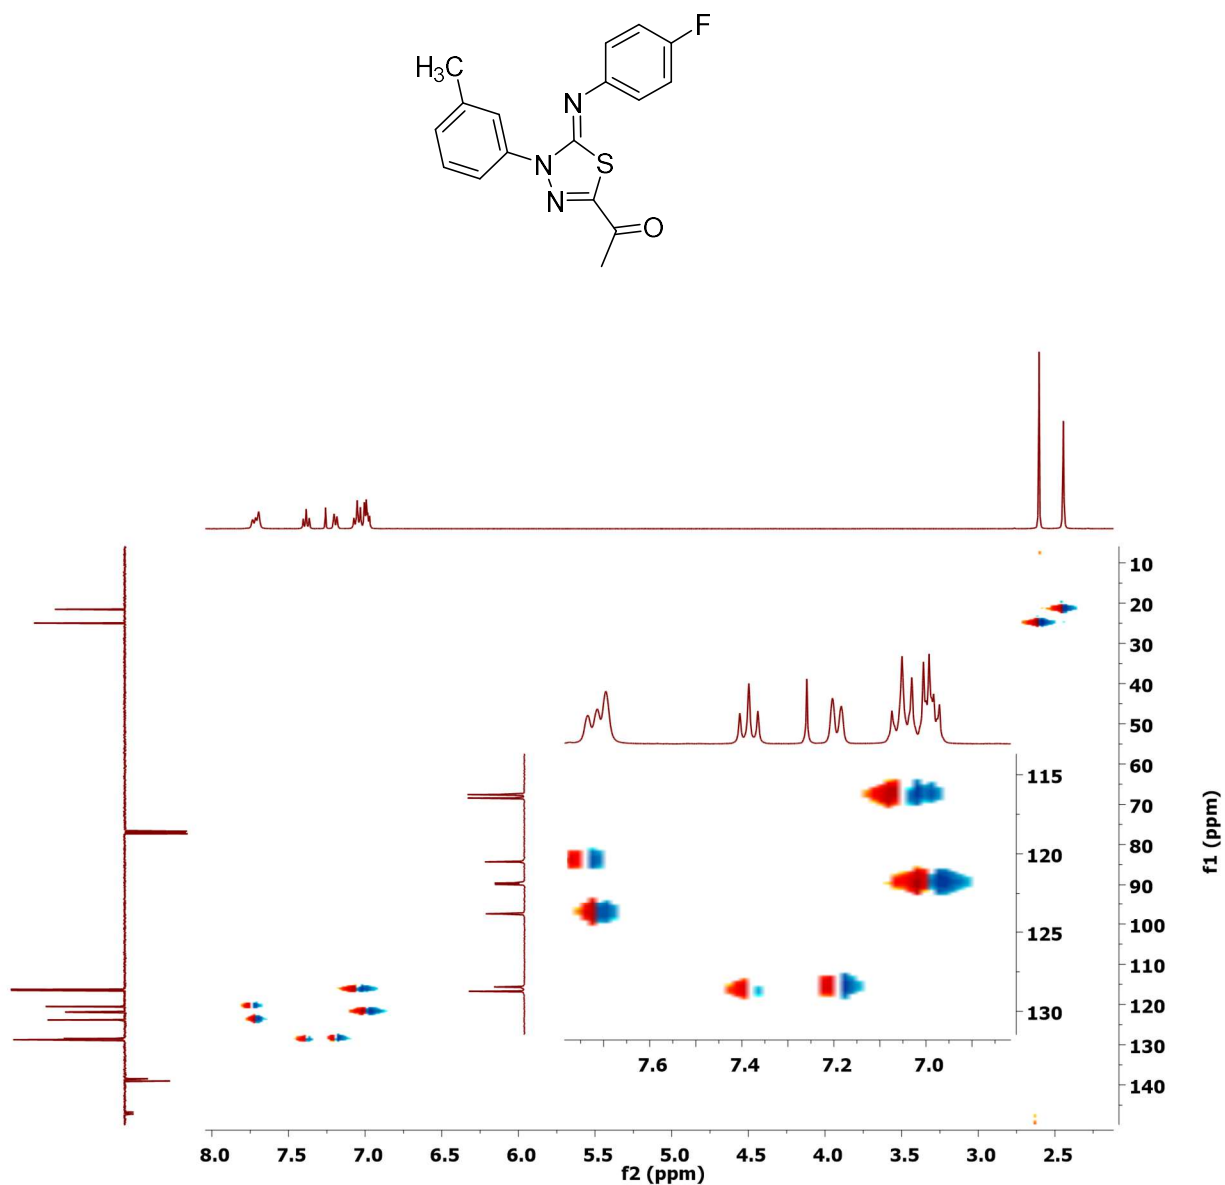

$^1\text{H}$ - $^{13}\text{C}$ -gHMBC NMR ( $\text{CDCl}_3$ ) spectrum of (Z)-1-(5-((4-fluorophenyl)imino)-4-(m-tolyl)-4,5-dihydro-1,3,4-thiadiazol-2-yl)ethan-1-one

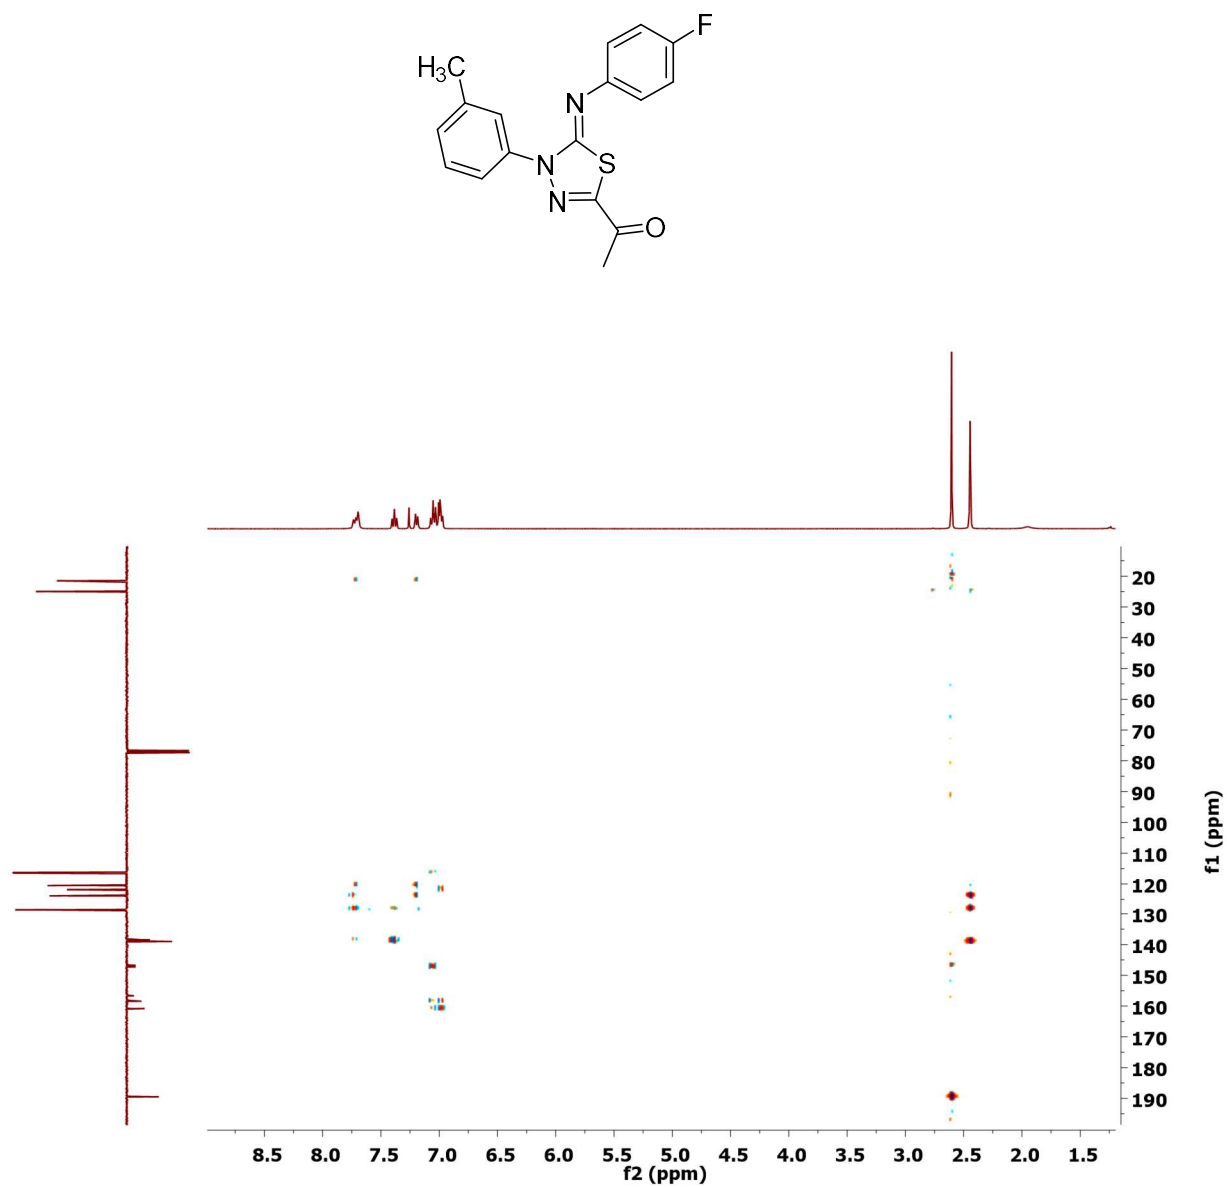

$^1\text{H}$  NMR ( $\text{CDCl}_3$ ) spectrum of (Z)-1-(4-(4-bromophenyl)-5-((4-isopropylphenyl)imino)-4,5-dihydro-1,3,4-thiadiazol-2-yl)ethan-1-one

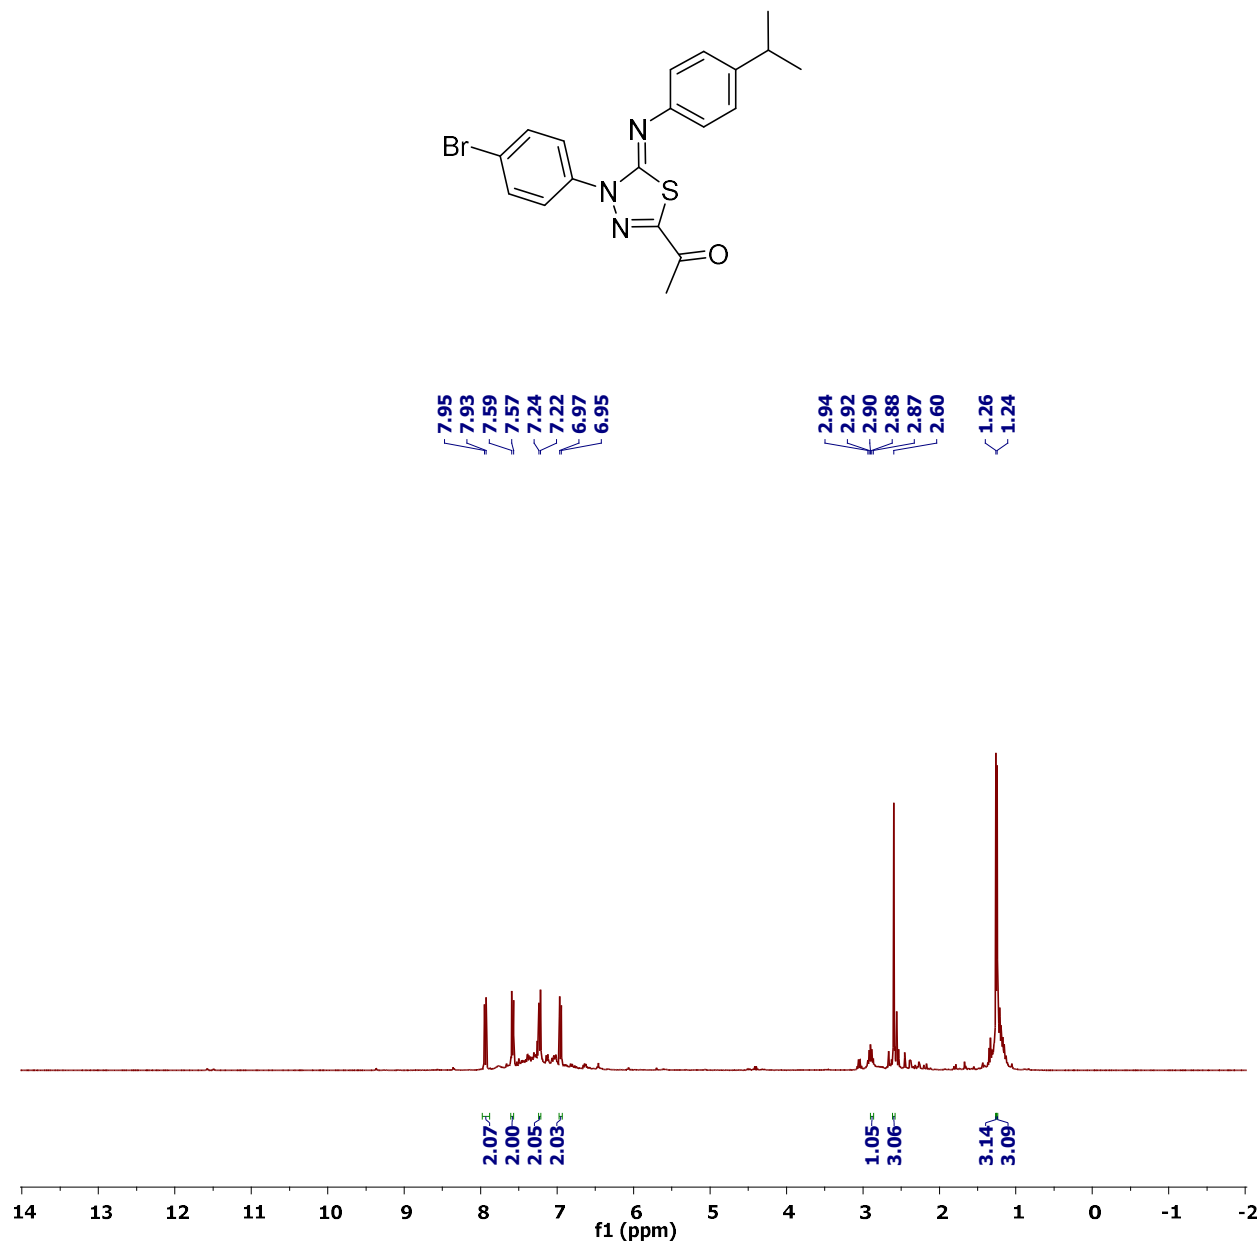

$^{13}\text{C}$  NMR ( $\text{CDCl}_3$ ) spectrum of (Z)-1-(4-(4-bromophenyl)-5-((4-isopropylphenyl)imino)-4,5-dihydro-1,3,4-thiadiazol-2-yl)ethan-1-one

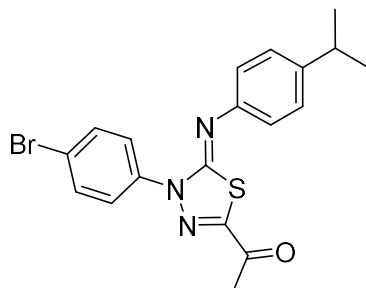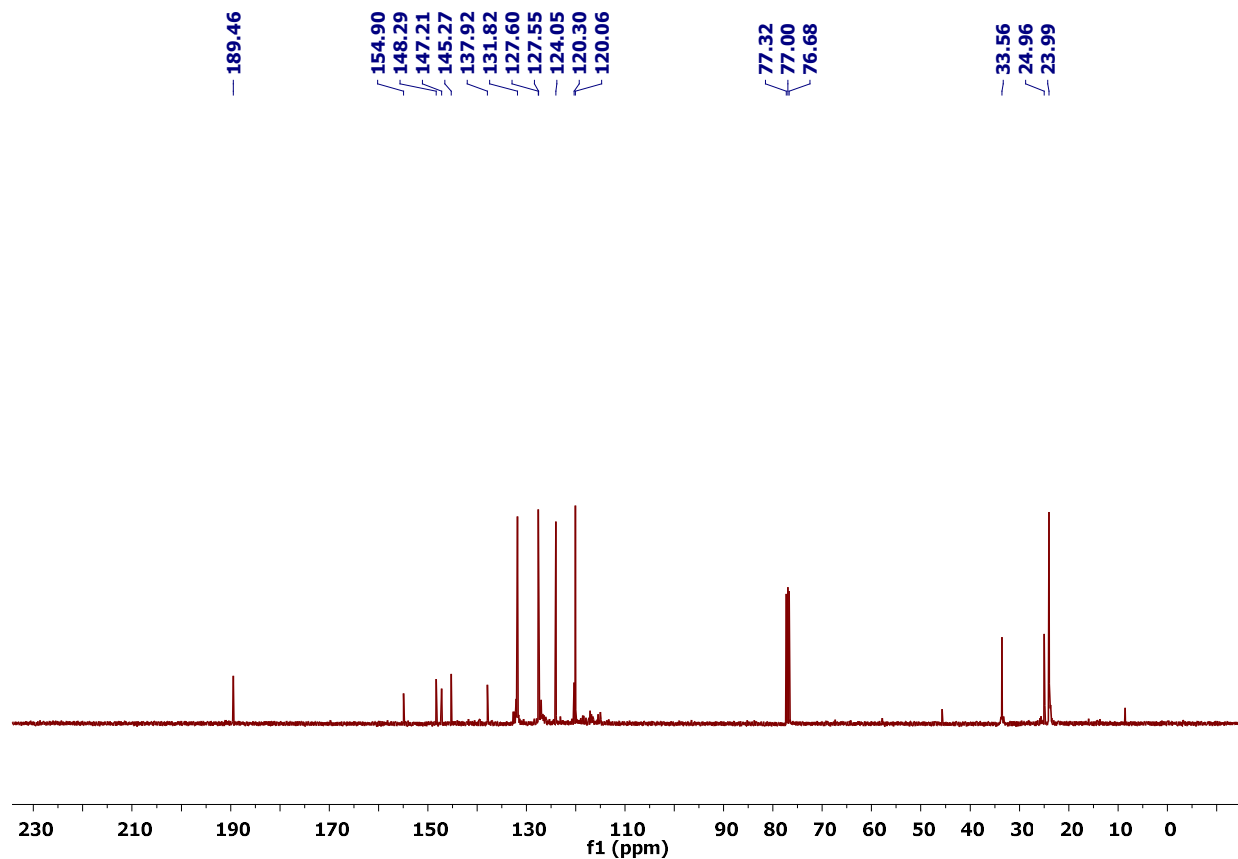

$^{13}\text{C}$  CRAPT NMR ( $\text{CDCl}_3$ ) spectrum of (Z)-1-(4-(4-bromophenyl)-5-((4-isopropylphenyl)imino)-4,5-dihydro-1,3,4-thiadiazol-2-yl)ethan-1-one

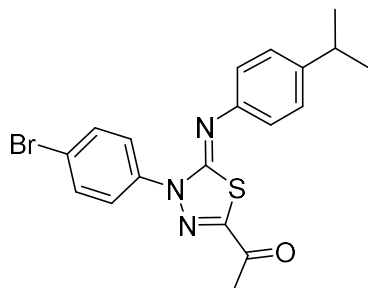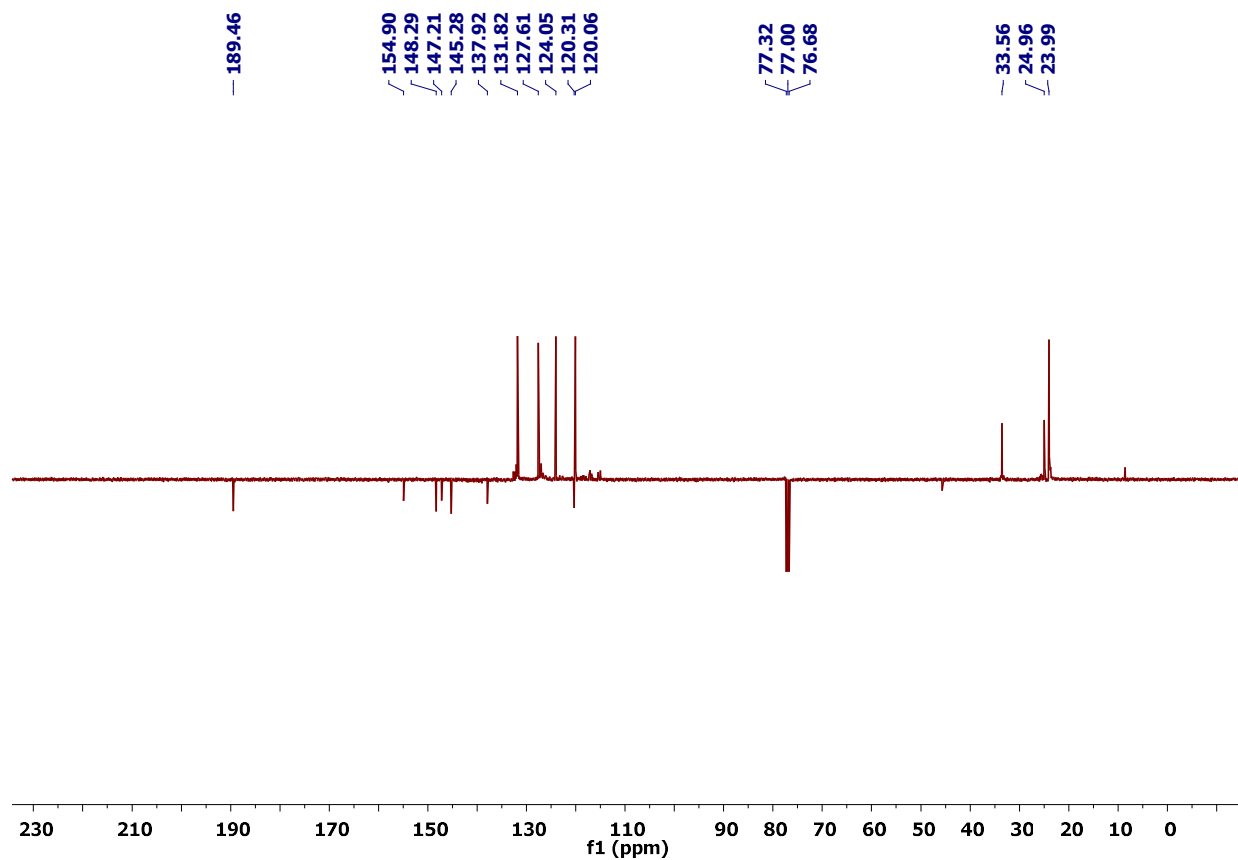



$^1\text{H}$ - $^1\text{H}$  gDQCOSY NMR ( $\text{CDCl}_3$ ) spectrum of (Z)-1-(4-(4-bromophenyl)-5-((4-isopropylphenyl)imino)-4,5-dihydro-1,3,4-thiadiazol-2-yl)ethan-1-one

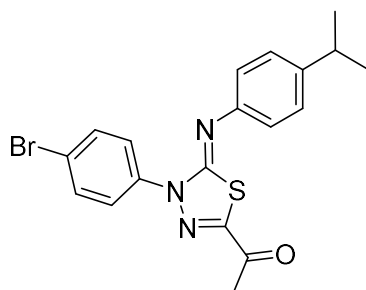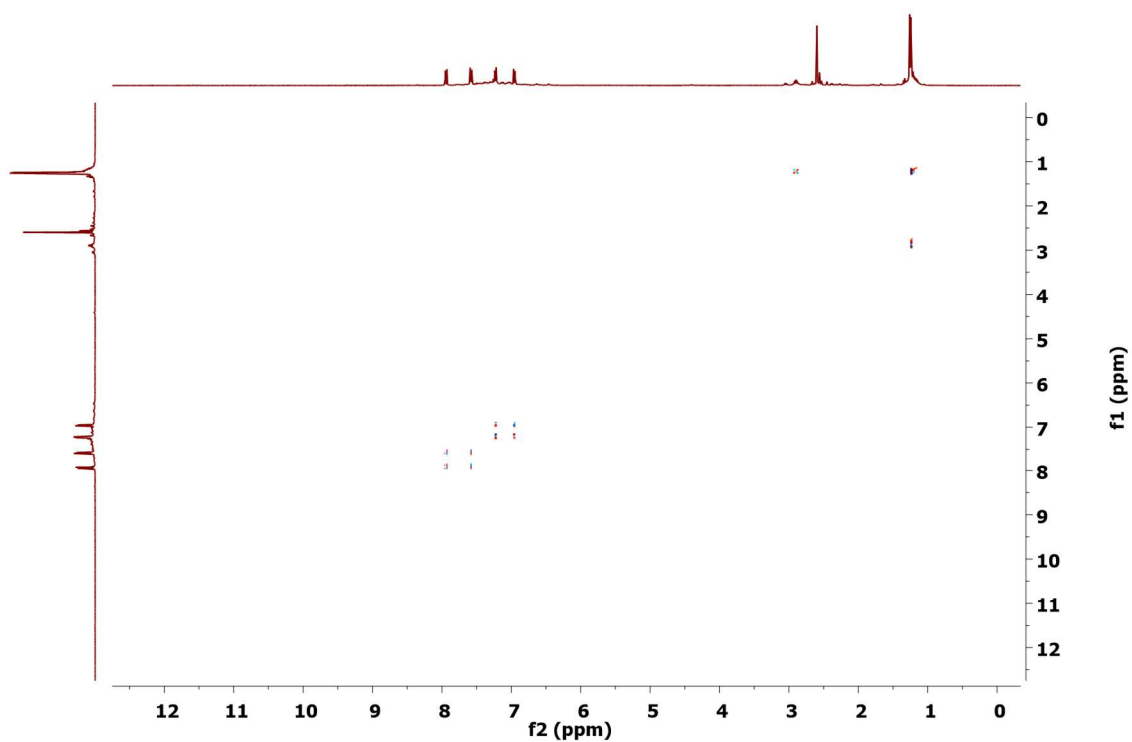

$^1\text{H}$ - $^{13}\text{C}$ -HSQC NMR ( $\text{CDCl}_3$ ) spectrum of (Z)-1-(4-(4-bromophenyl)-5-((4-isopropylphenyl)imino)-4,5-dihydro-1,3,4-thiadiazol-2-yl)ethan-1-one

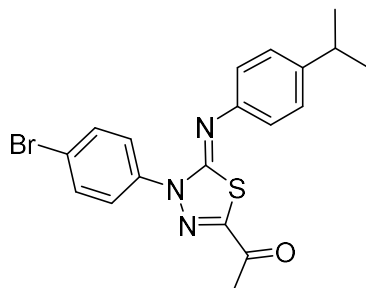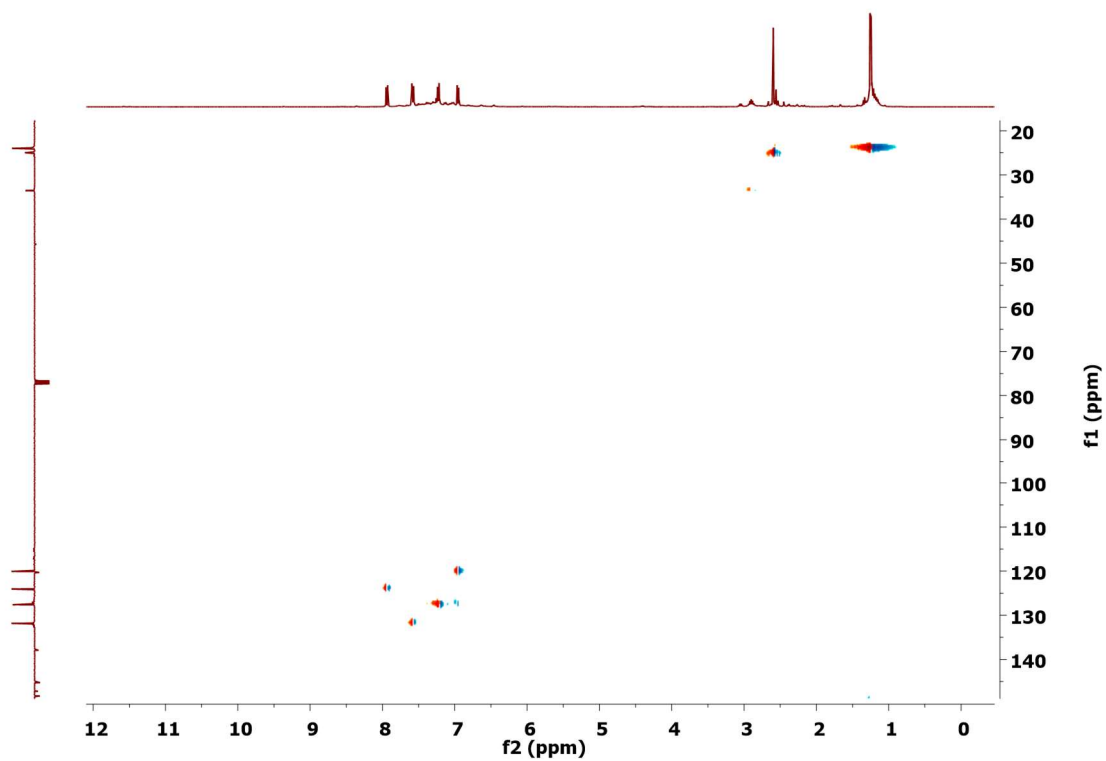

$^1\text{H}$ - $^{13}\text{C}$ -gHMBC NMR ( $\text{CDCl}_3$ ) spectrum of (Z)-1-(4-(4-bromophenyl)-5-((4-isopropylphenyl)imino)-4,5-dihydro-1,3,4-thiadiazol-2-yl)ethan-1-one

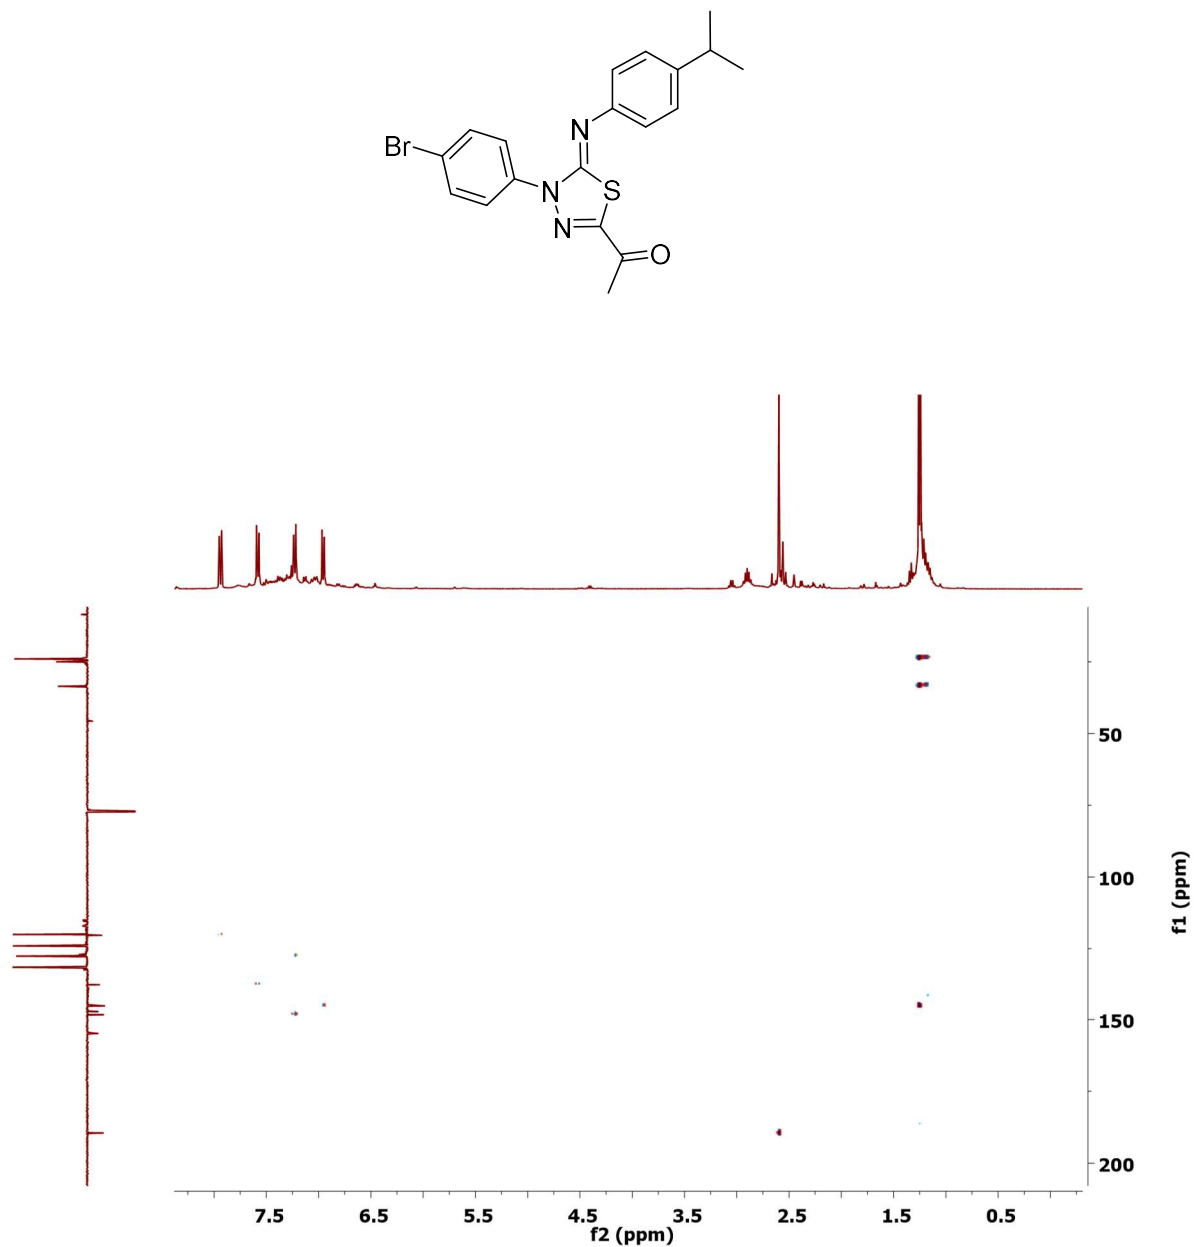

$^1\text{H}$  NMR ( $\text{CDCl}_3$ ) spectrum of (Z)-1-(4-(2,3-difluorophenyl)-5-((4-nitrophenyl)imino)-4,5-dihydro-1,3,4-thiadiazol-2-yl)ethan-1-one

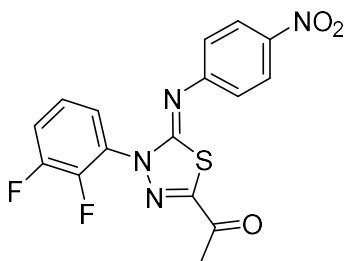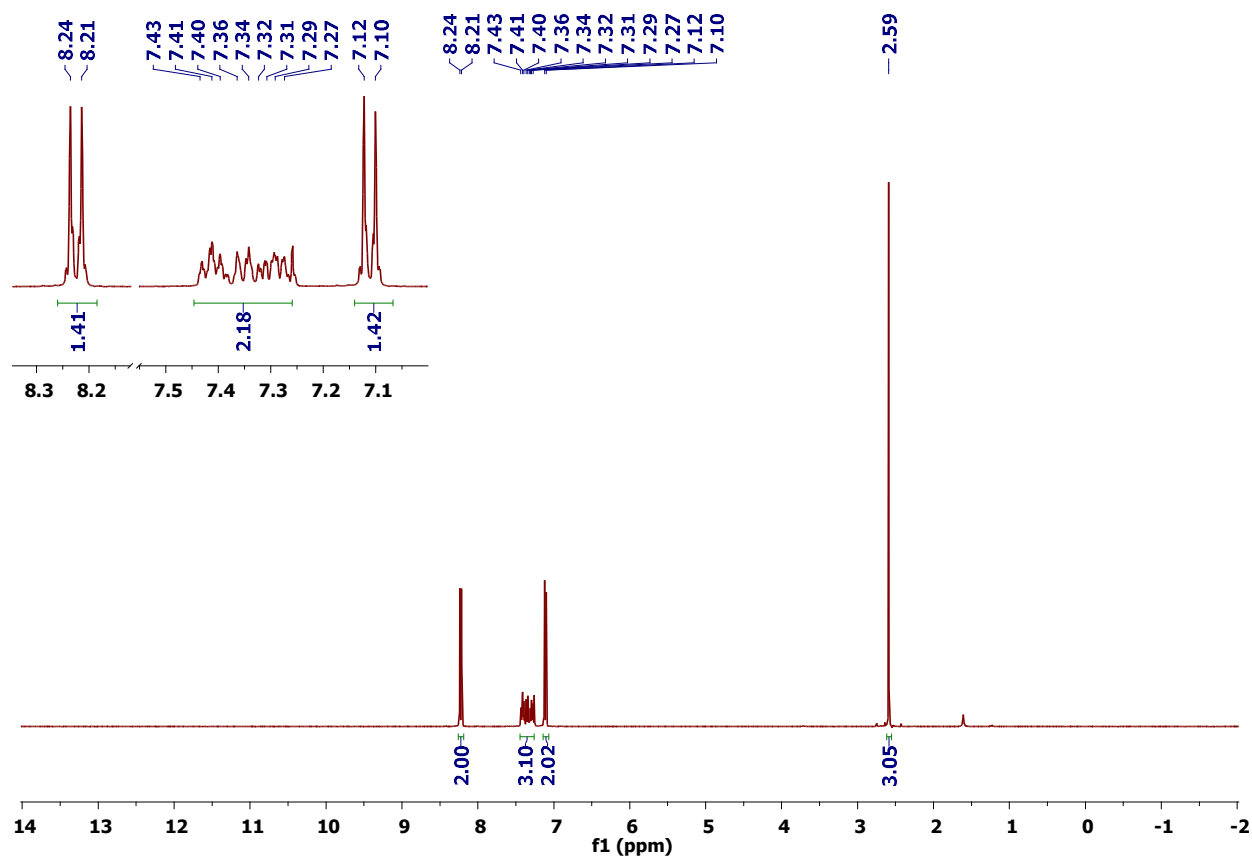

$^{13}\text{C}$  NMR ( $\text{CDCl}_3$ ) spectrum of (Z)-1-(4-(2,3-difluorophenyl)-5-((4-nitrophenyl)imino)-4,5-dihydro-1,3,4-thiadiazol-2-yl)ethan-1-one

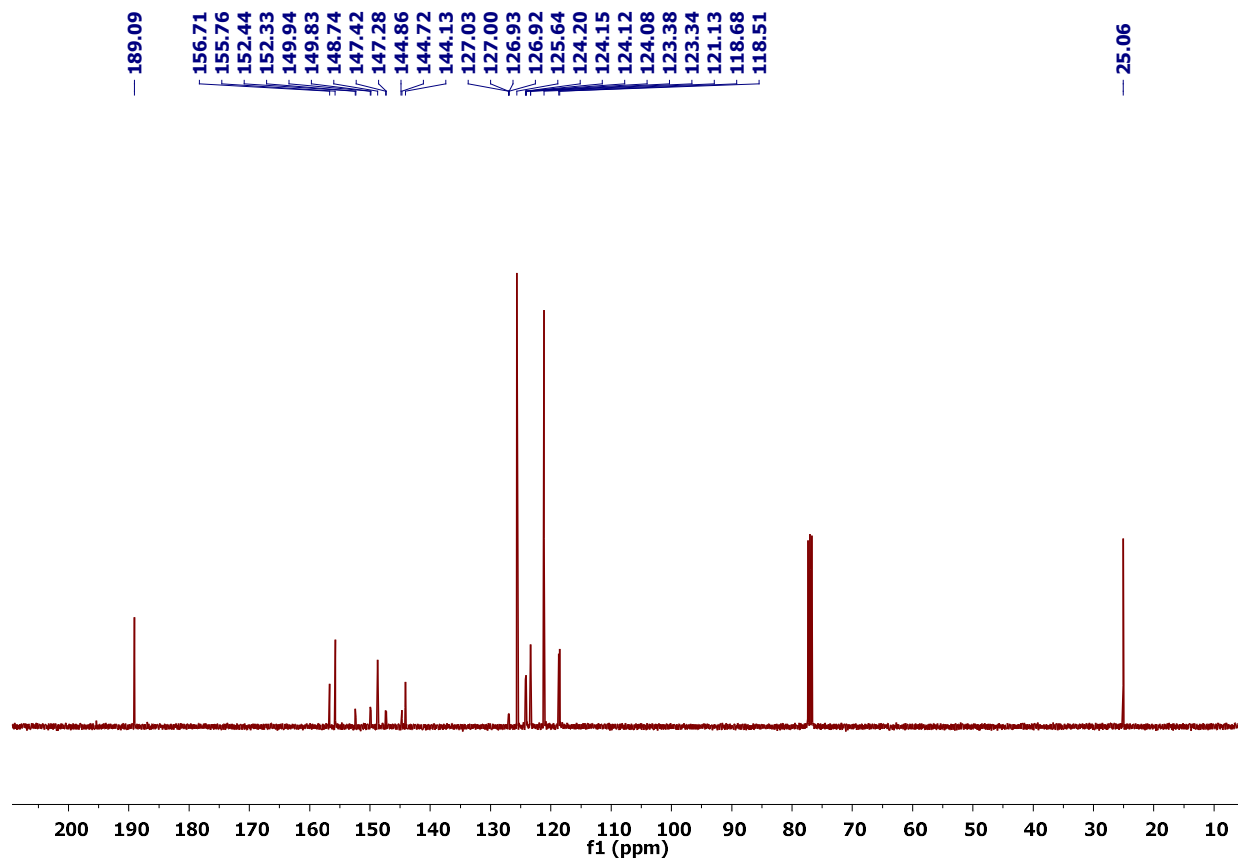

$^{13}\text{C}$  CRAPT NMR ( $\text{CDCl}_3$ ) spectrum of (Z)-1-(4-(2,3-difluorophenyl)-5-((4-nitrophenyl)imino)-4,5-dihydro-1,3,4-thiadiazol-2-yl)ethan-1-one

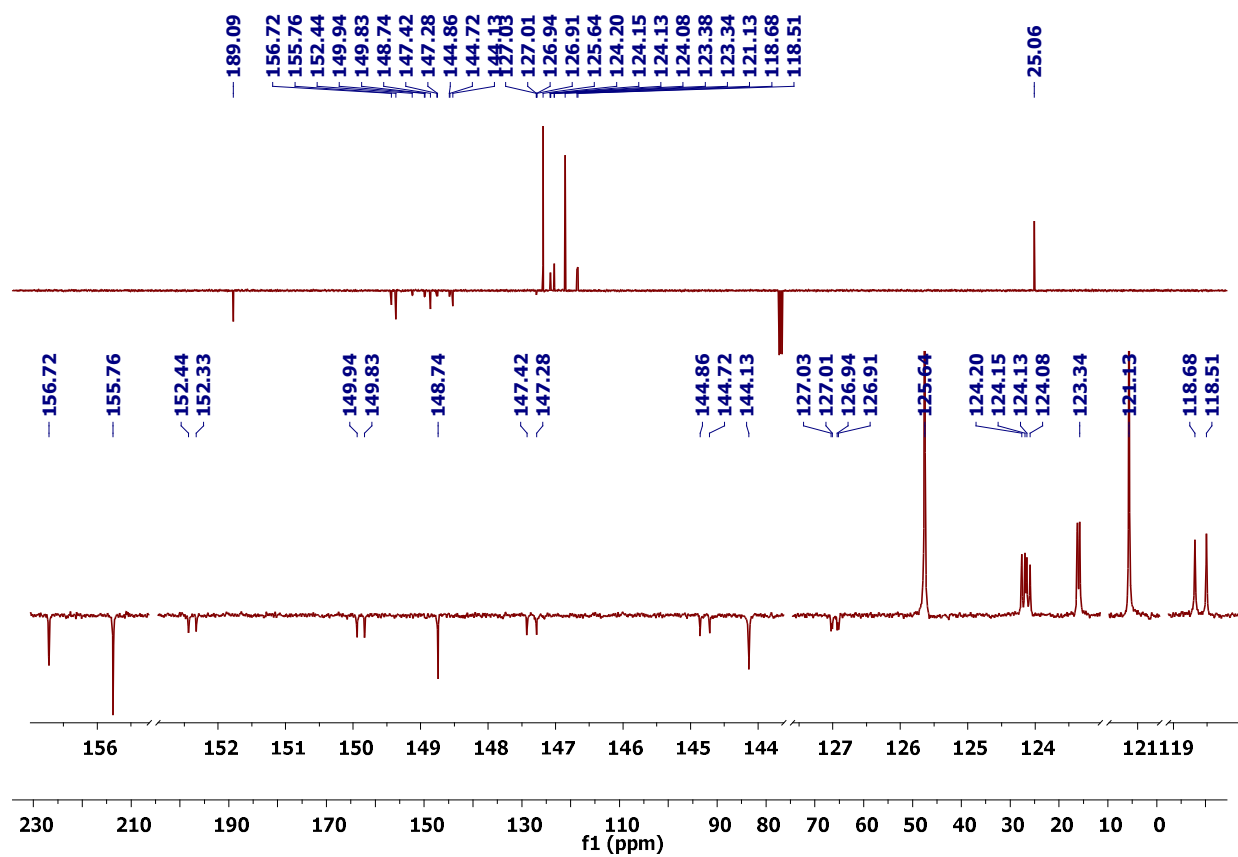

$^1\text{H}$ - $^1\text{H}$  gDQCOSY NMR ( $\text{CDCl}_3$ ) spectrum of (Z)-1-(4-(2,3-difluorophenyl)-5-((4-nitrophenyl)imino)-4,5-dihydro-1,3,4-thiadiazol-2-yl)ethan-1-one

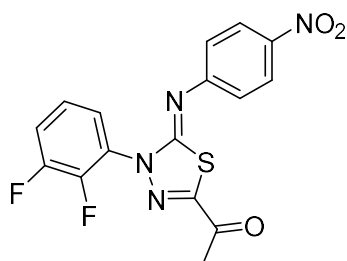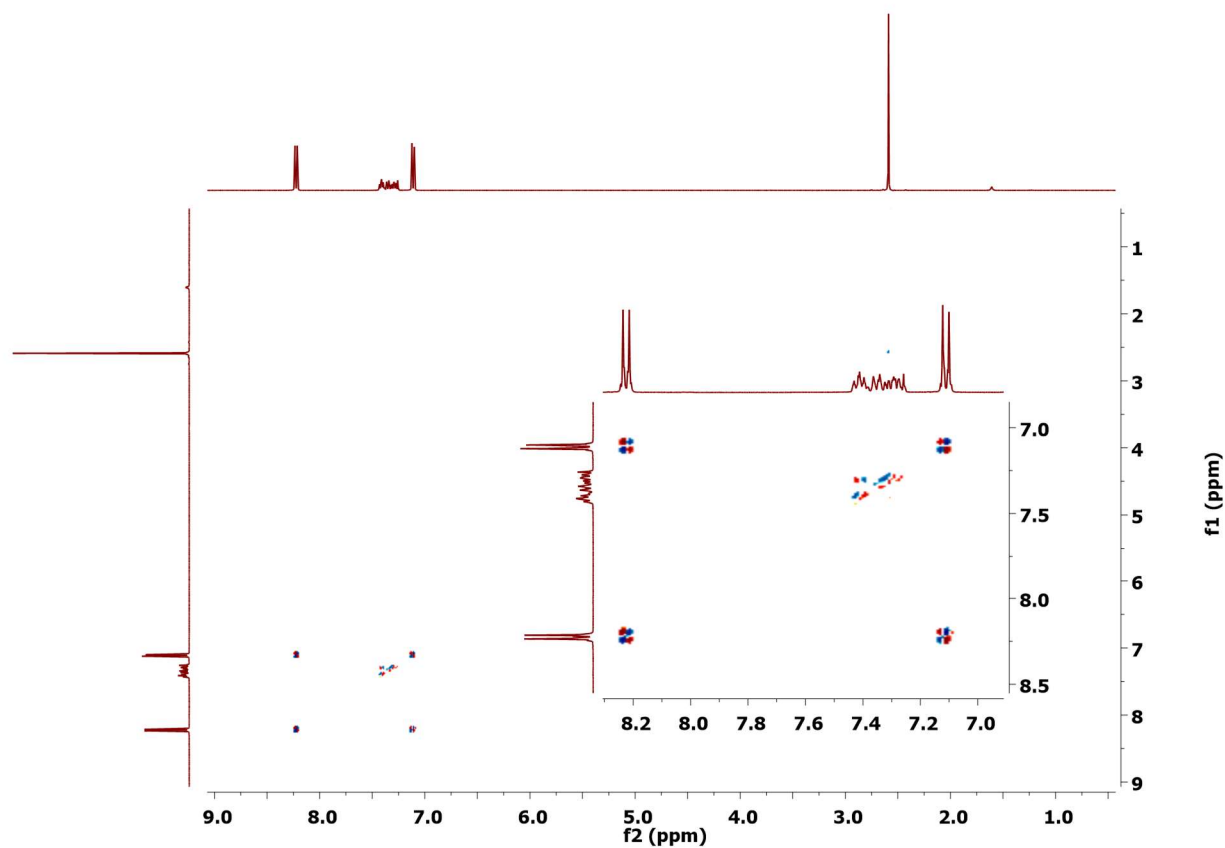

$^1\text{H}$ - $^{13}\text{C}$ -HSQC NMR ( $\text{CDCl}_3$ ) spectrum of (Z)-1-(4-(2,3-difluorophenyl)-5-((4-nitrophenyl)imino)-4,5-dihydro-1,3,4-thiadiazol-2-yl)ethan-1-one

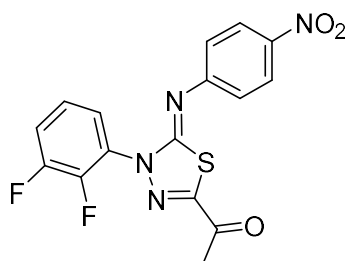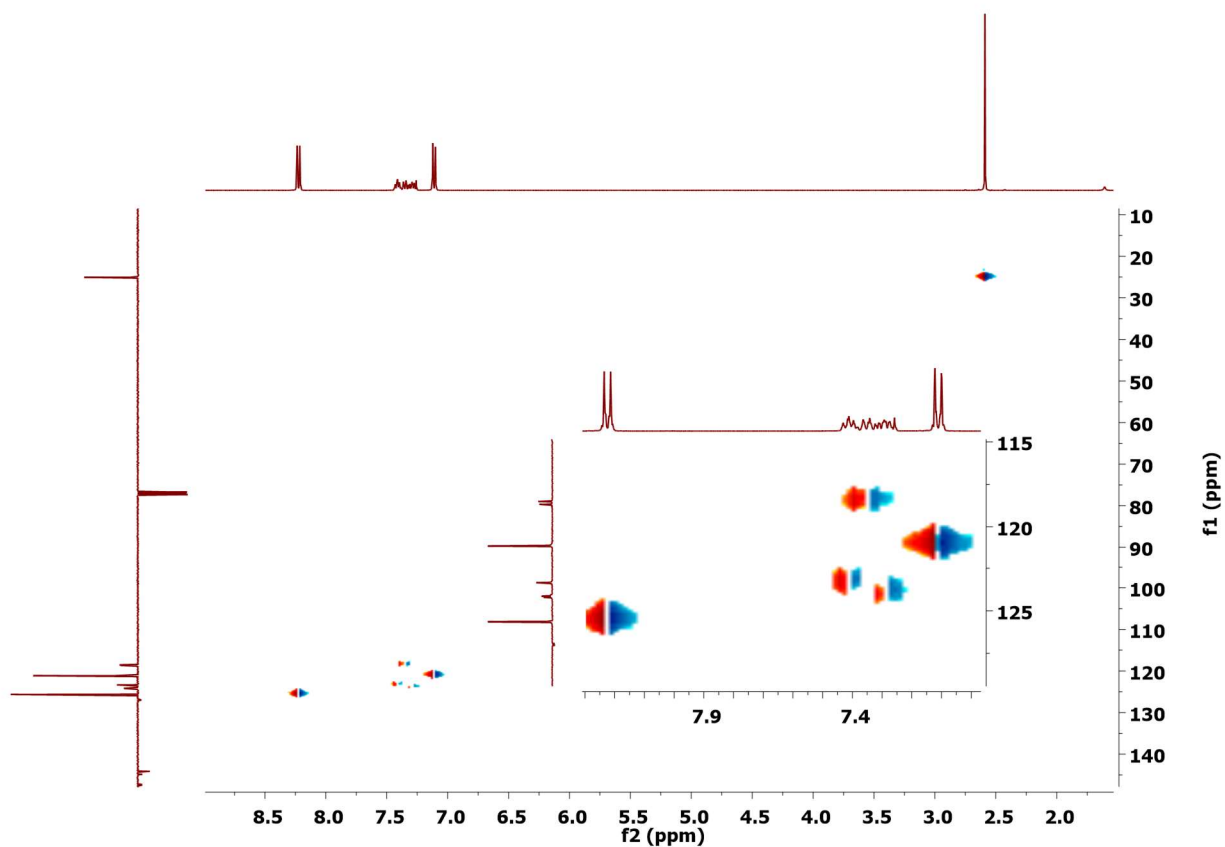



$^1\text{H}$ - $^{13}\text{C}$ -gHMBC NMR ( $\text{CDCl}_3$ ) spectrum of (Z)-1-(4-(2,3-difluorophenyl)-5-((4-nitrophenyl)imino)-4,5-dihydro-1,3,4-thiadiazol-2-yl)ethan-1-one

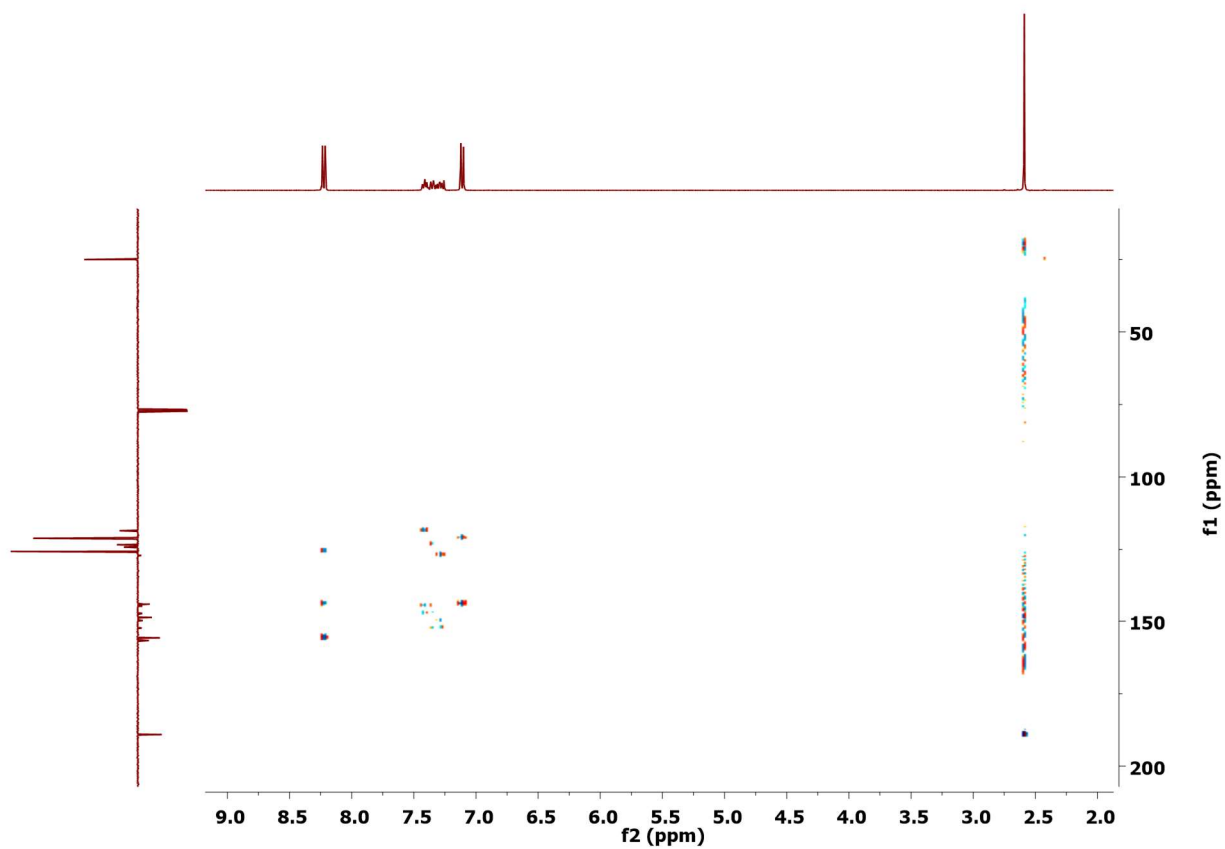

$^1\text{H}$  NMR ( $\text{CDCl}_3$ ) spectrum of (Z)-1-(5-((4-chlorophenyl)imino)-4-(2,3-difluorophenyl)-4,5-dihydro-1,3,4-thiadiazol-2-yl)ethan-1-one

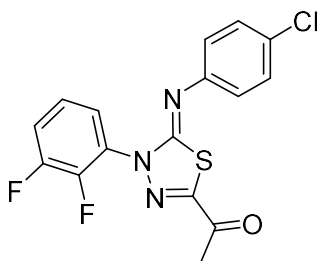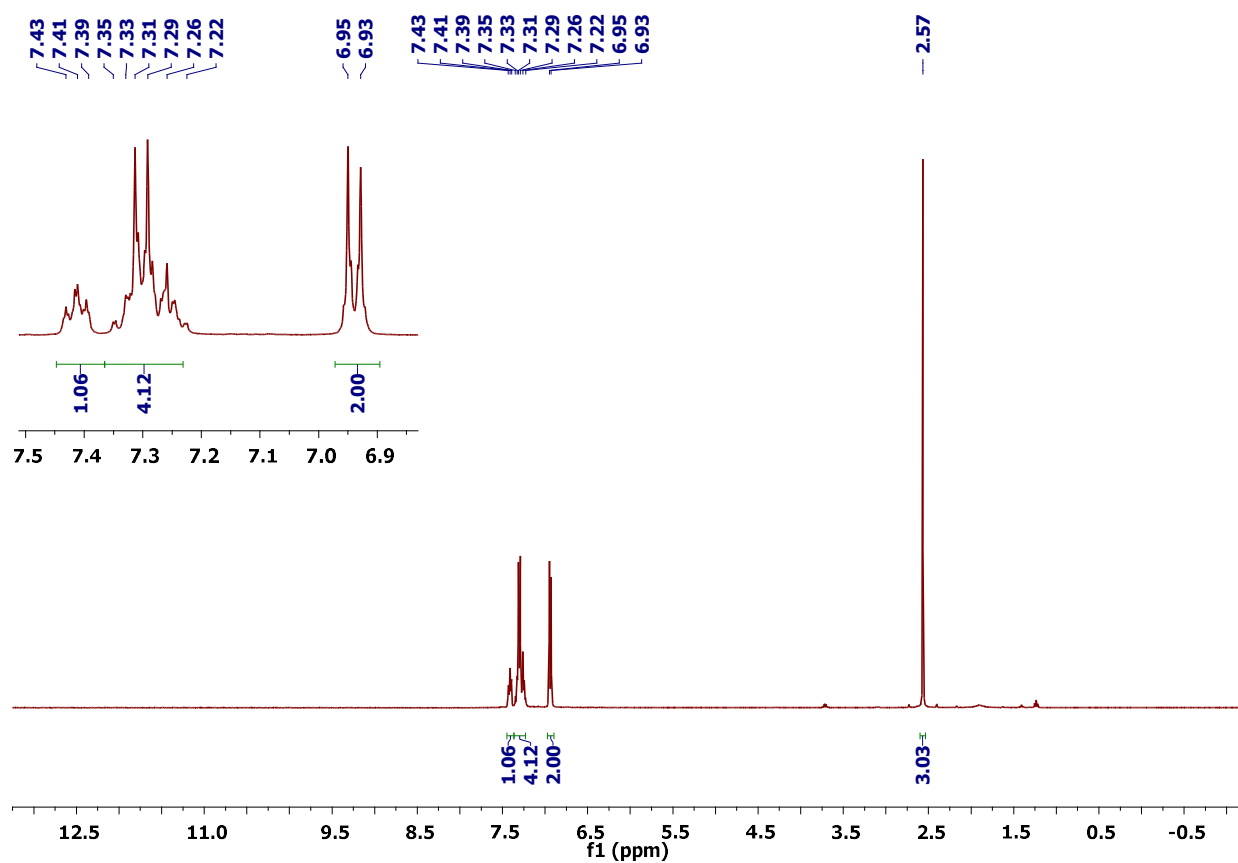

$^{13}\text{C}$  NMR ( $\text{CDCl}_3$ ) spectrum of (Z)-1-(5-((4-chlorophenyl)imino)-4-(2,3-difluorophenyl)-4,5-dihydro-1,3,4-thiadiazol-2-yl)ethan-1-one

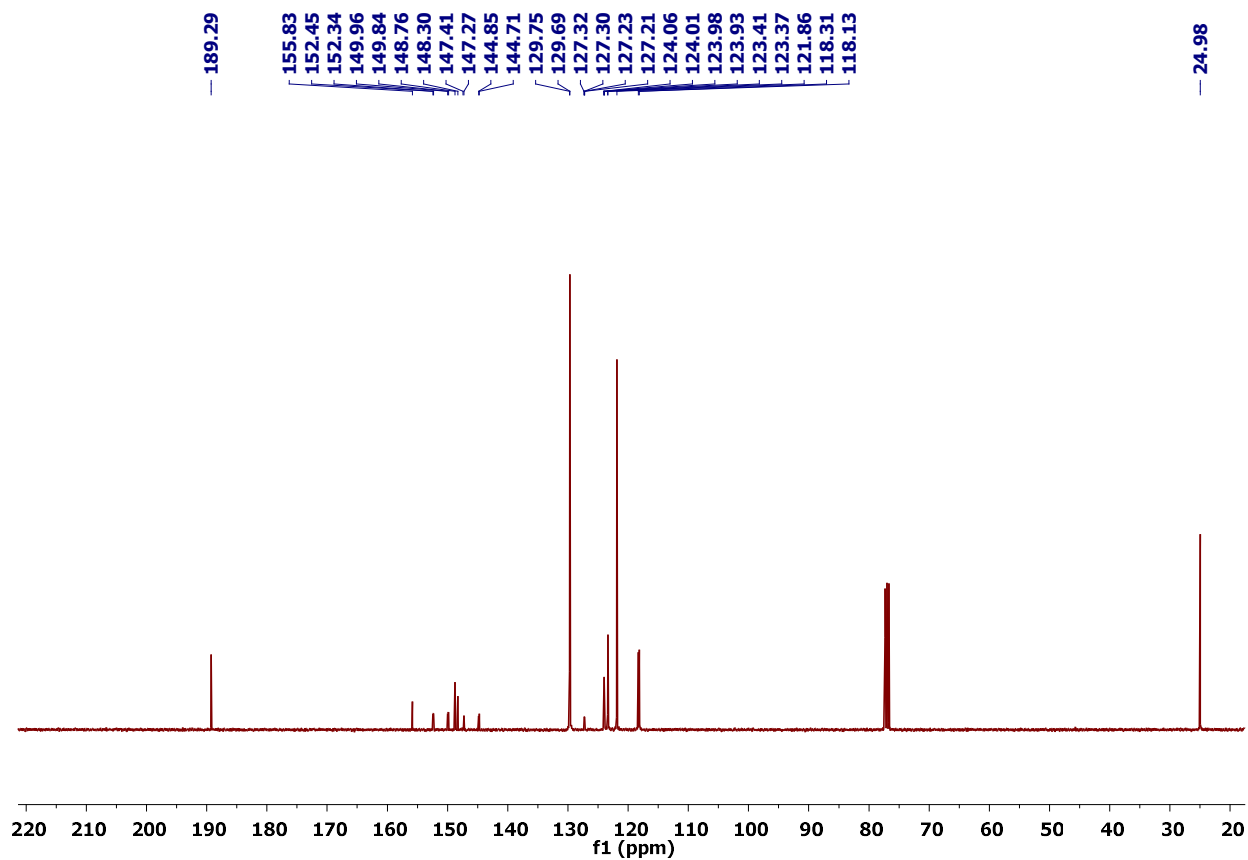

$^{13}\text{C}$  CRAPT NMR ( $\text{CDCl}_3$ ) spectrum of (Z)-1-(5-((4-chlorophenyl)imino)-4-(2,3-difluorophenyl)-4,5-dihydro-1,3,4-thiadiazol-2-yl)ethan-1-one

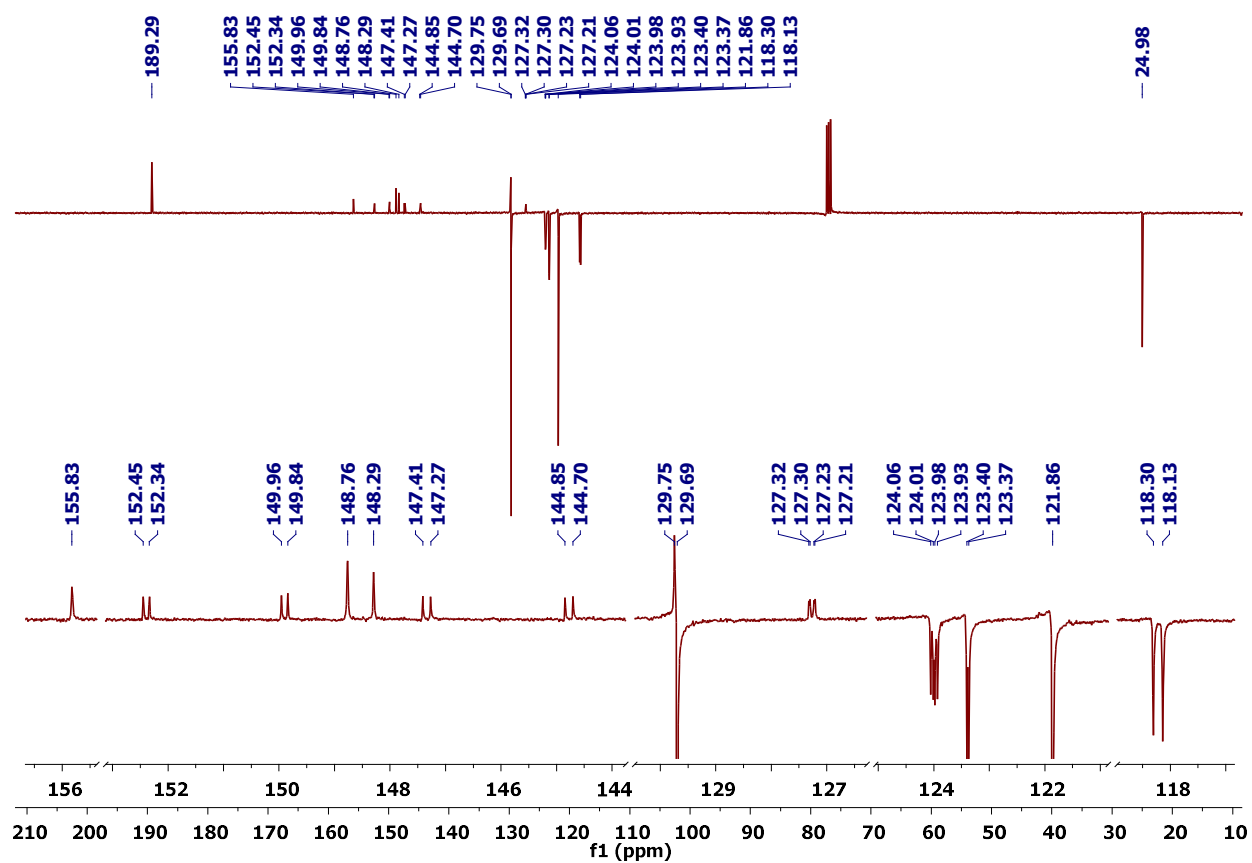

$^1\text{H}$ - $^1\text{H}$  gDQCOSY NMR ( $\text{CDCl}_3$ ) spectrum of (Z)-1-(5-((4-chlorophenyl)imino)-4-(2,3-difluorophenyl)-4,5-dihydro-1,3,4-thiadiazol-2-yl)ethan-1-one

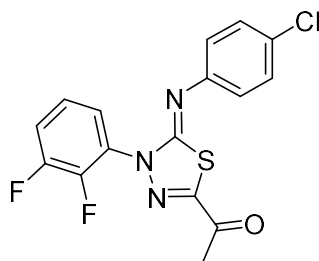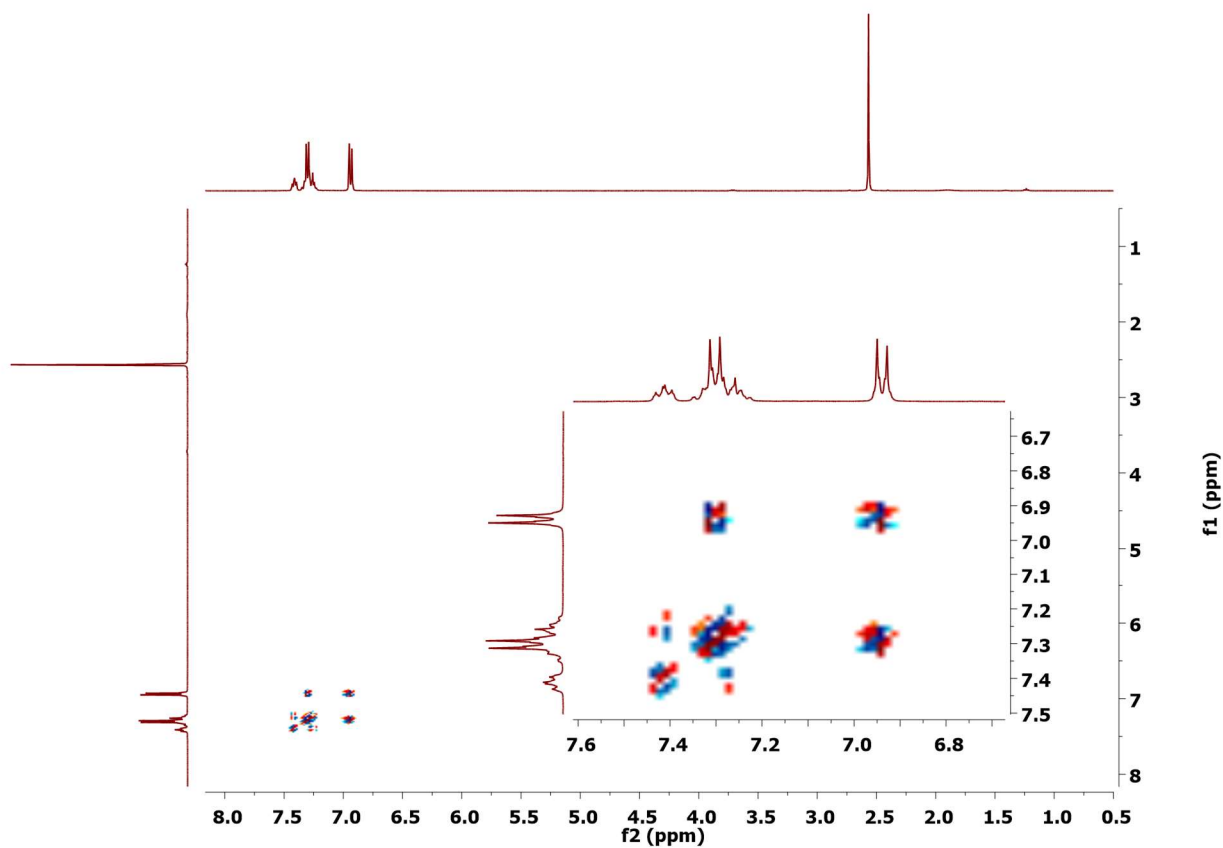

$^1\text{H}$ - $^{13}\text{C}$ -HSQC NMR ( $\text{CDCl}_3$ ) spectrum of (Z)-1-(5-((4-chlorophenyl)imino)-4-(2,3-difluorophenyl)-4,5-dihydro-1,3,4-thiadiazol-2-yl)ethan-1-one

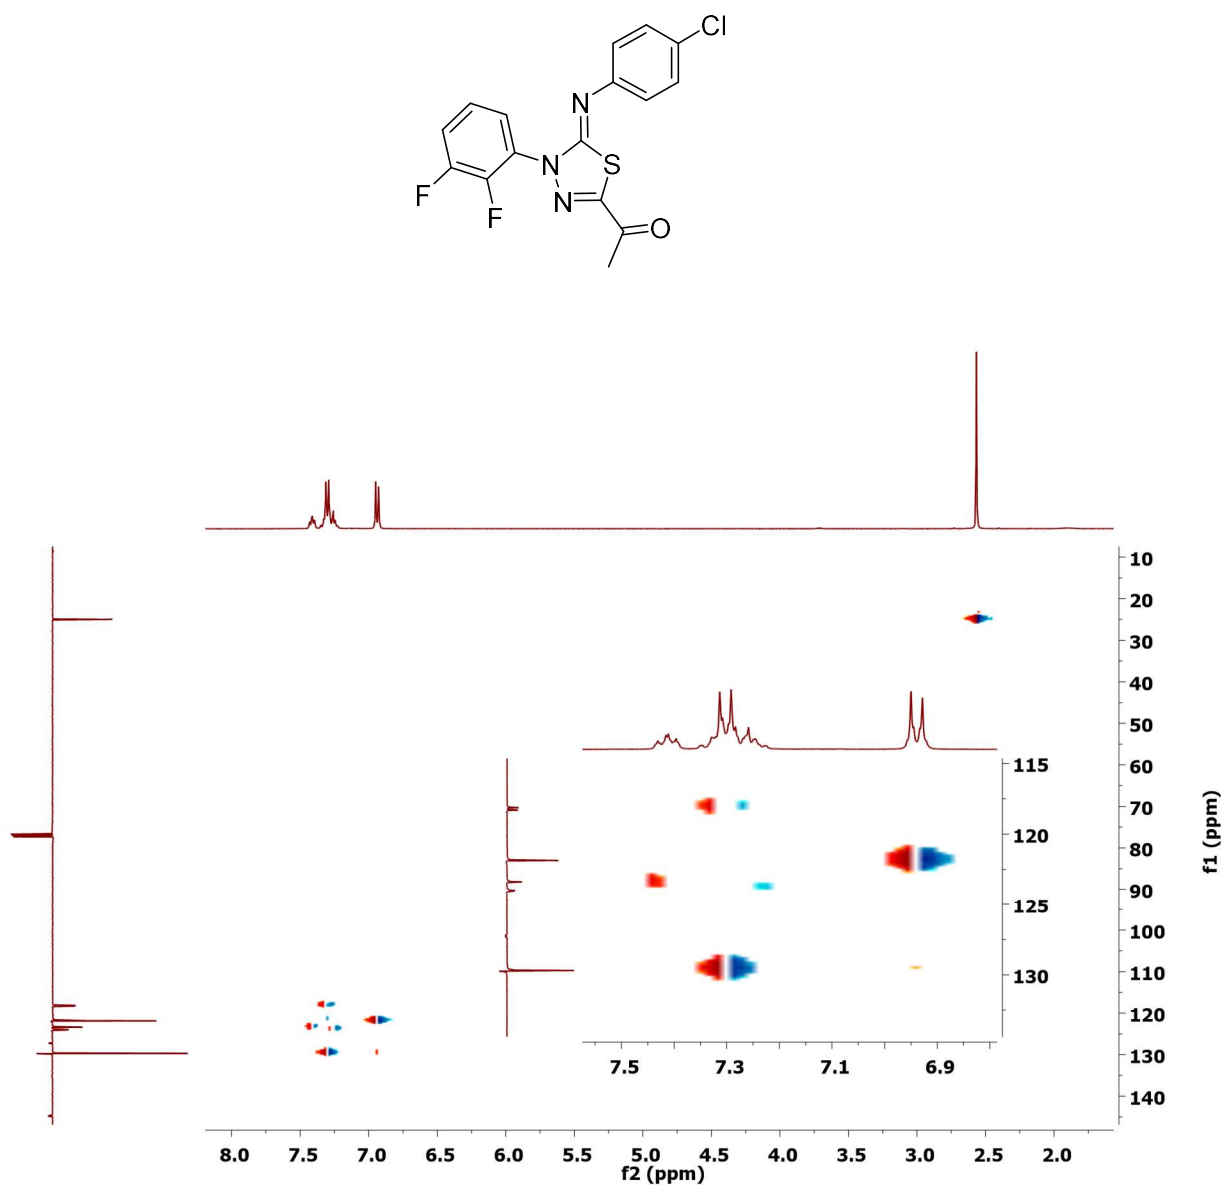

$^1\text{H}$ - $^{13}\text{C}$ -gHMBC NMR ( $\text{CDCl}_3$ ) spectrum of (Z)-1-(5-((4-chlorophenyl)imino)-4-(2,3-difluorophenyl)-4,5-dihydro-1,3,4-thiadiazol-2-yl)ethan-1-one

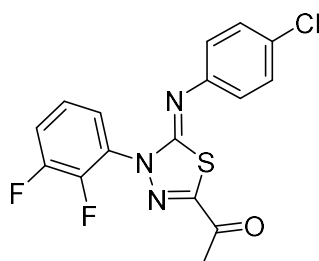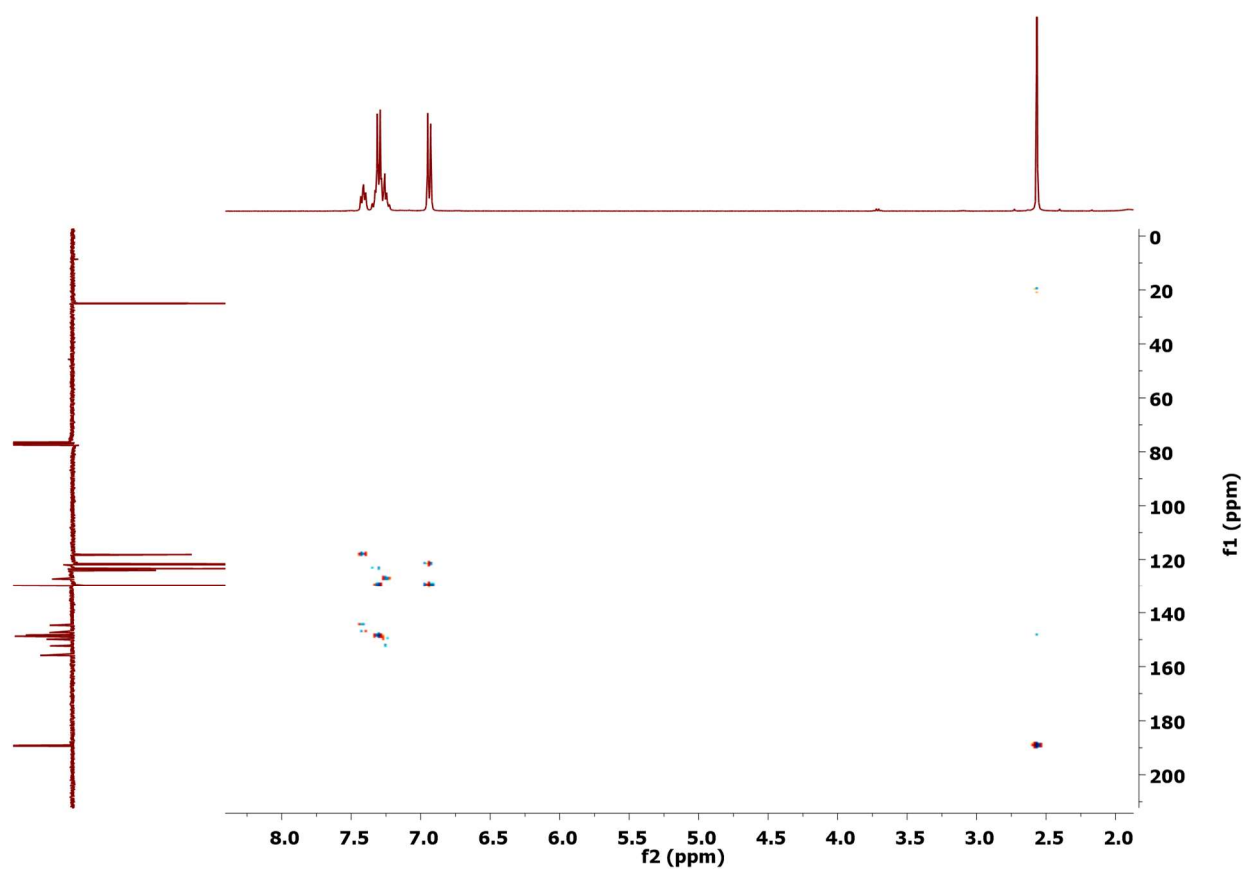

$^1\text{H}$  NMR ( $\text{CDCl}_3$ ) spectrum of (Z)-1-(4-(4-bromophenyl)-5-((3-fluorophenyl)imino)-4,5-dihydro-1,3,4-thiadiazol-2-yl)ethan-1-one

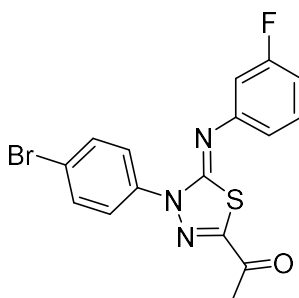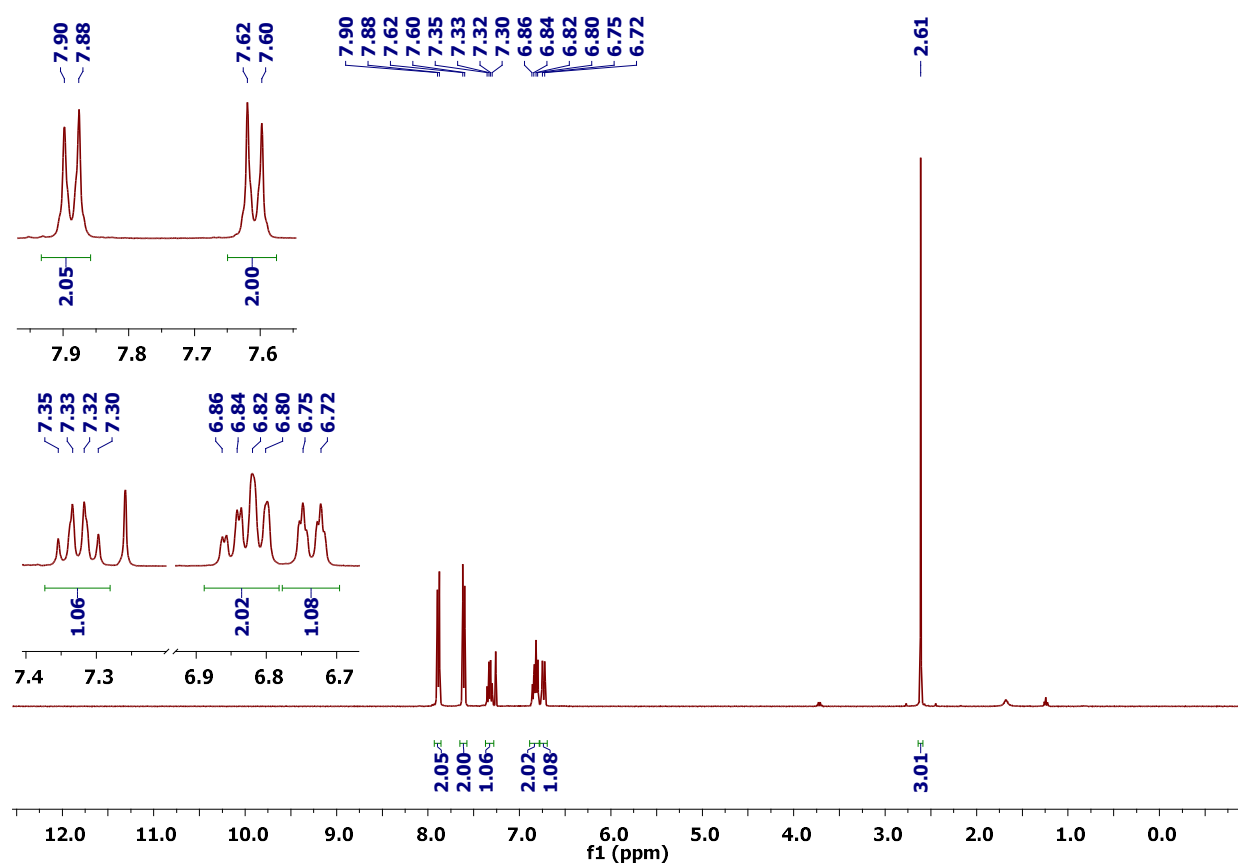



$^{13}\text{C}$  NMR ( $\text{CDCl}_3$ ) spectrum of (Z)-1-(4-(4-bromophenyl)-5-((3-fluorophenyl)imino)-4,5-dihydro-1,3,4-thiadiazol-2-yl)ethan-1-one

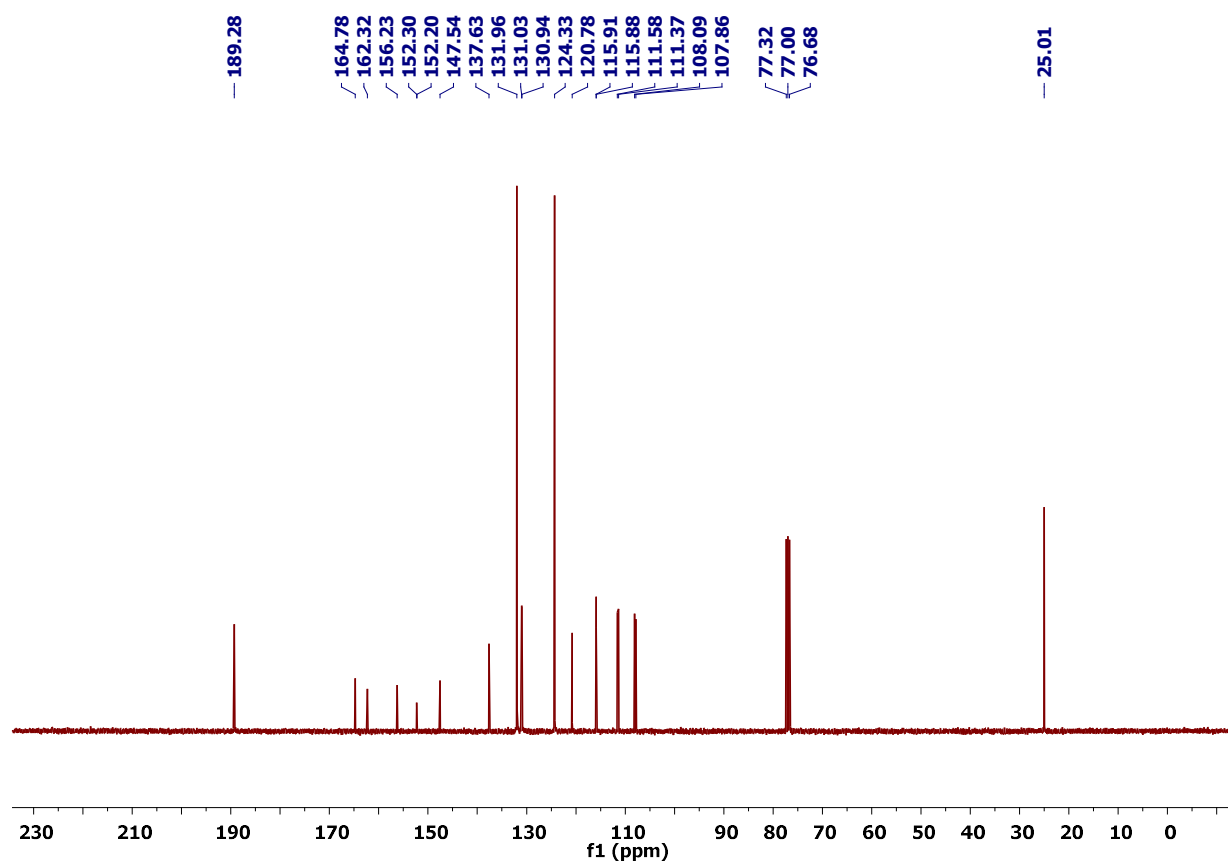

$^{13}\text{C}$  CRAPT NMR ( $\text{CDCl}_3$ ) spectrum of (Z)-1-(4-(4-bromophenyl)-5-((3-fluorophenyl)imino)-4,5-dihydro-1,3,4-thiadiazol-2-yl)ethan-1-one

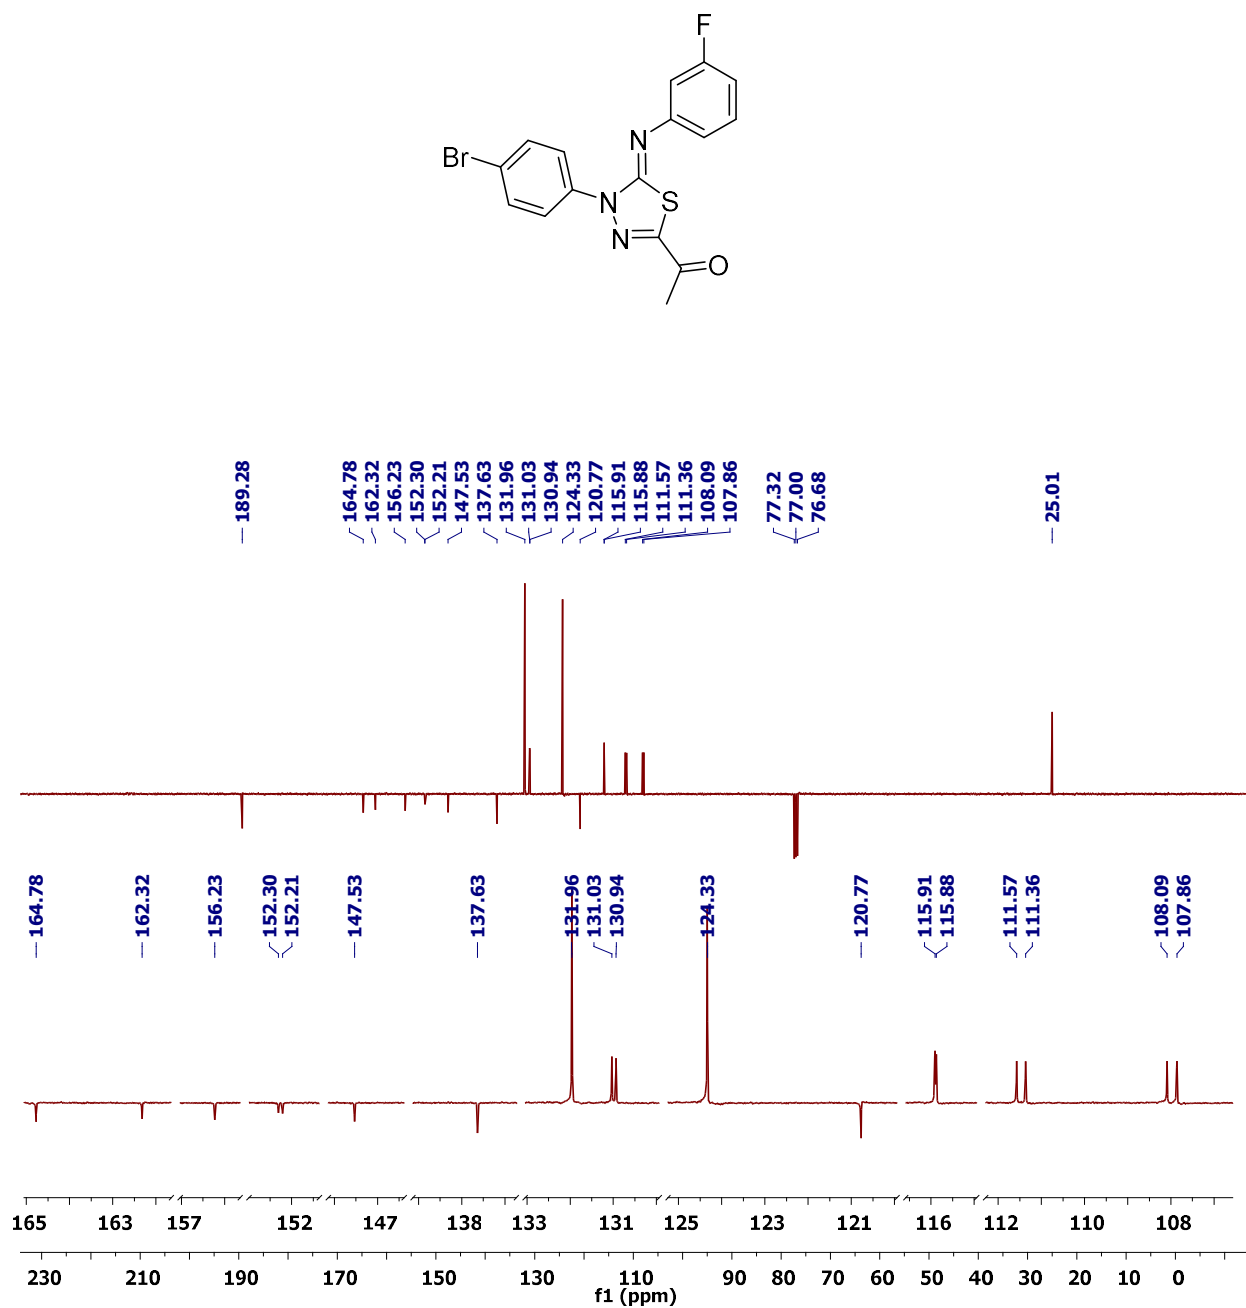

$^1\text{H}$ - $^1\text{H}$  gDQCOSY NMR ( $\text{CDCl}_3$ ) spectrum of (Z)-1-(4-(4-bromophenyl)-5-((3-fluorophenyl)imino)-4,5-dihydro-1,3,4-thiadiazol-2-yl)ethan-1-one

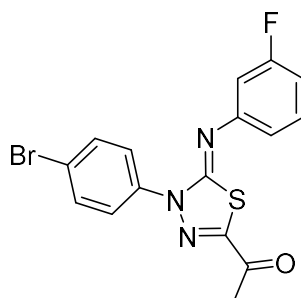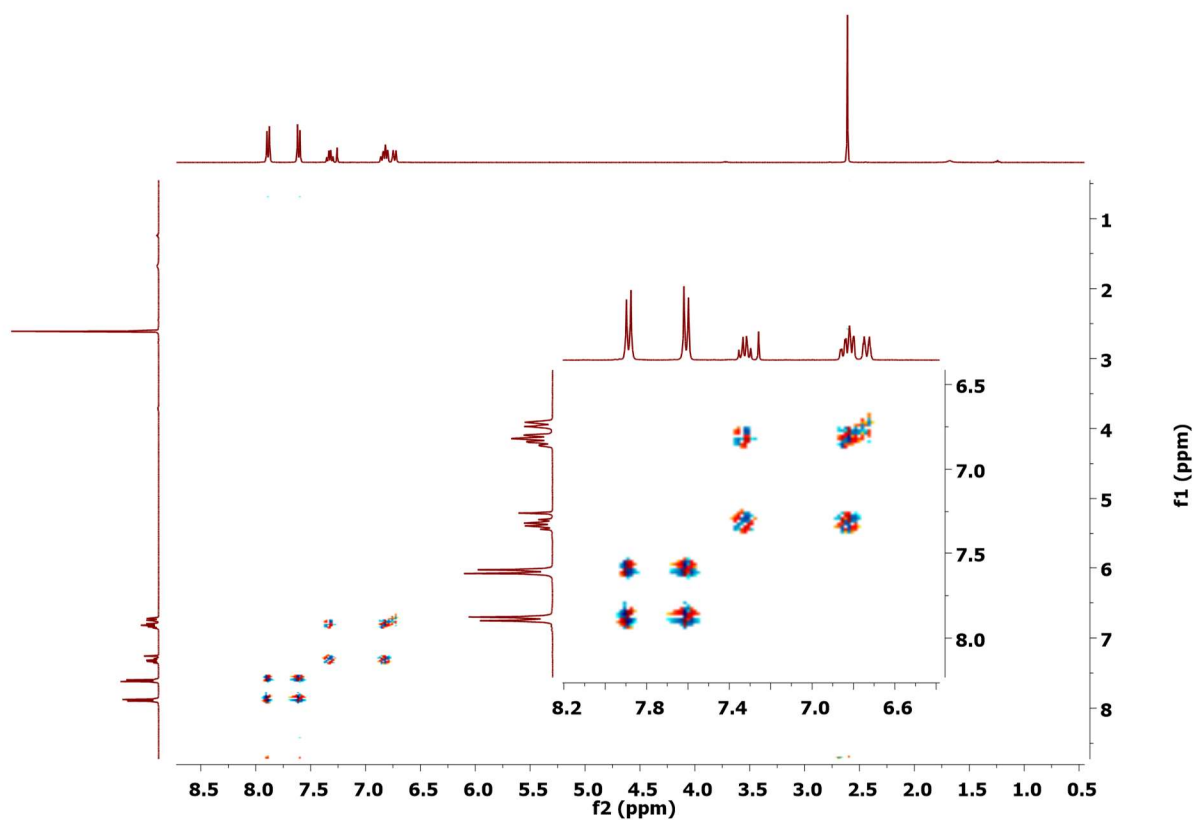

$^1\text{H}$ - $^{13}\text{C}$ -HSQC NMR ( $\text{CDCl}_3$ ) spectrum of (Z)-1-(4-(4-bromophenyl)-5-((3-fluorophenyl)imino)-4,5-dihydro-1,3,4-thiadiazol-2-yl)ethan-1-one

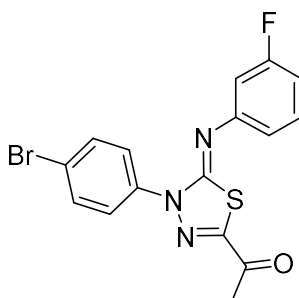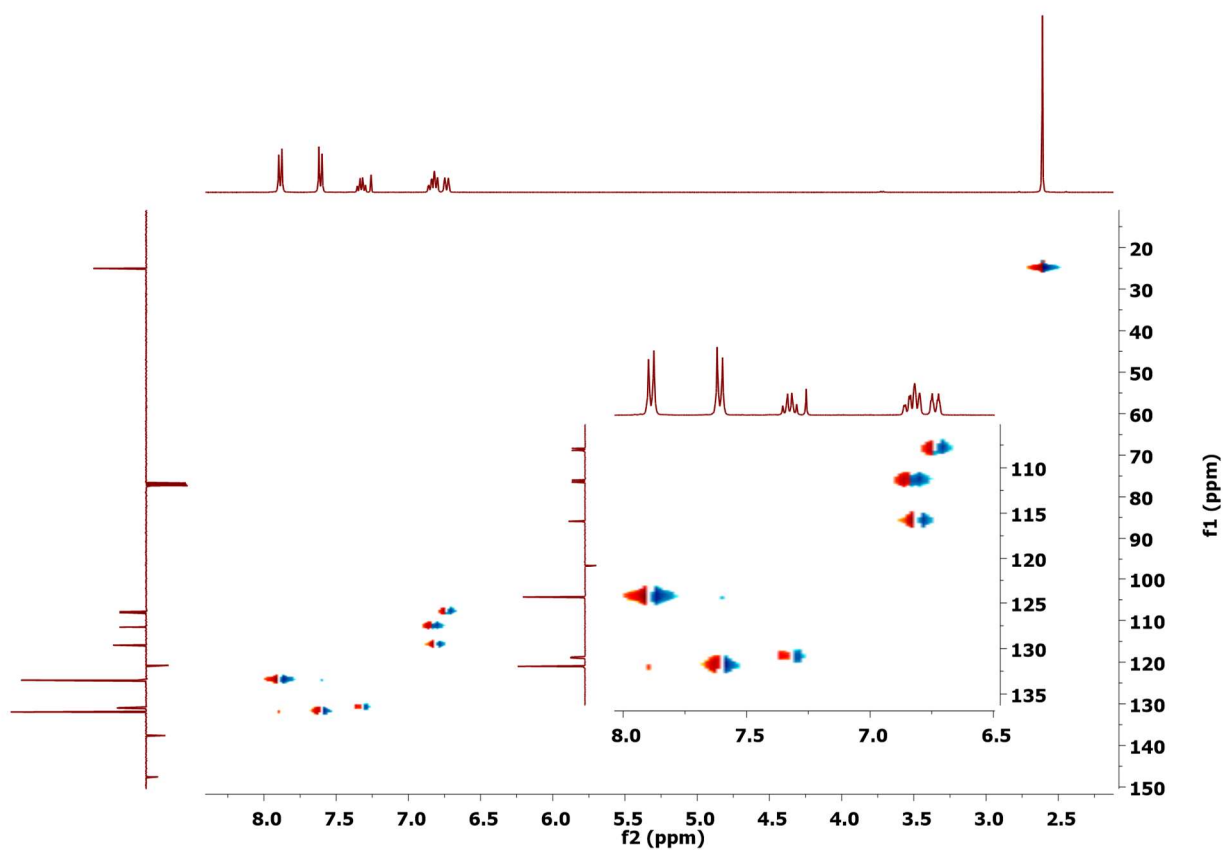

$^1\text{H}$ - $^{13}\text{C}$ -gHMBC NMR ( $\text{CDCl}_3$ ) spectrum of (Z)-1-(4-(4-bromophenyl)-5-((3-fluorophenyl)imino)-4,5-dihydro-1,3,4-thiadiazol-2-yl)ethan-1-one

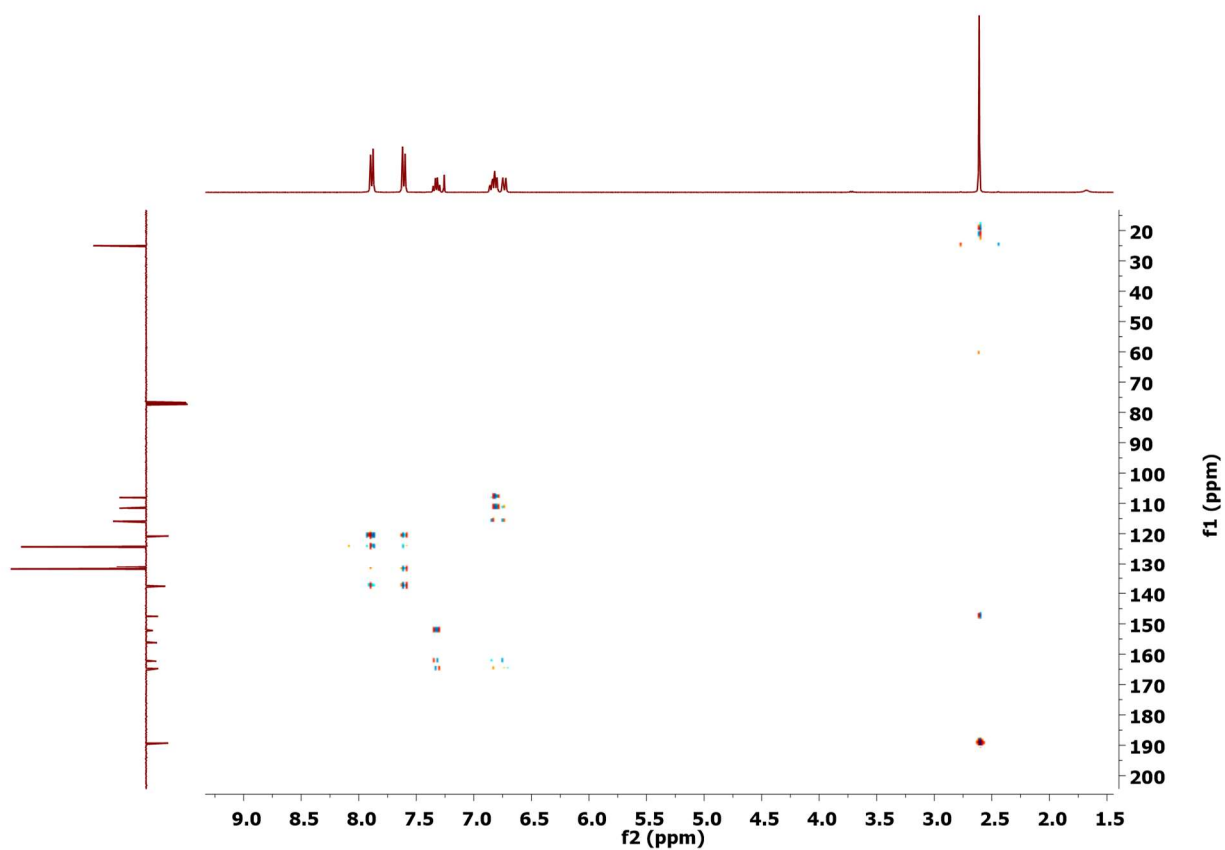

$^1\text{H}$  NMR ( $\text{CDCl}_3$ ) spectrum of (Z)-1-(4-(4-chlorophenyl)-5-((3-fluorophenyl)imino)-4,5-dihydro-1,3,4-thiadiazol-2-yl)ethan-1-one

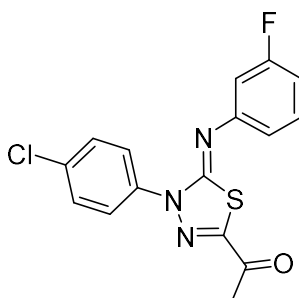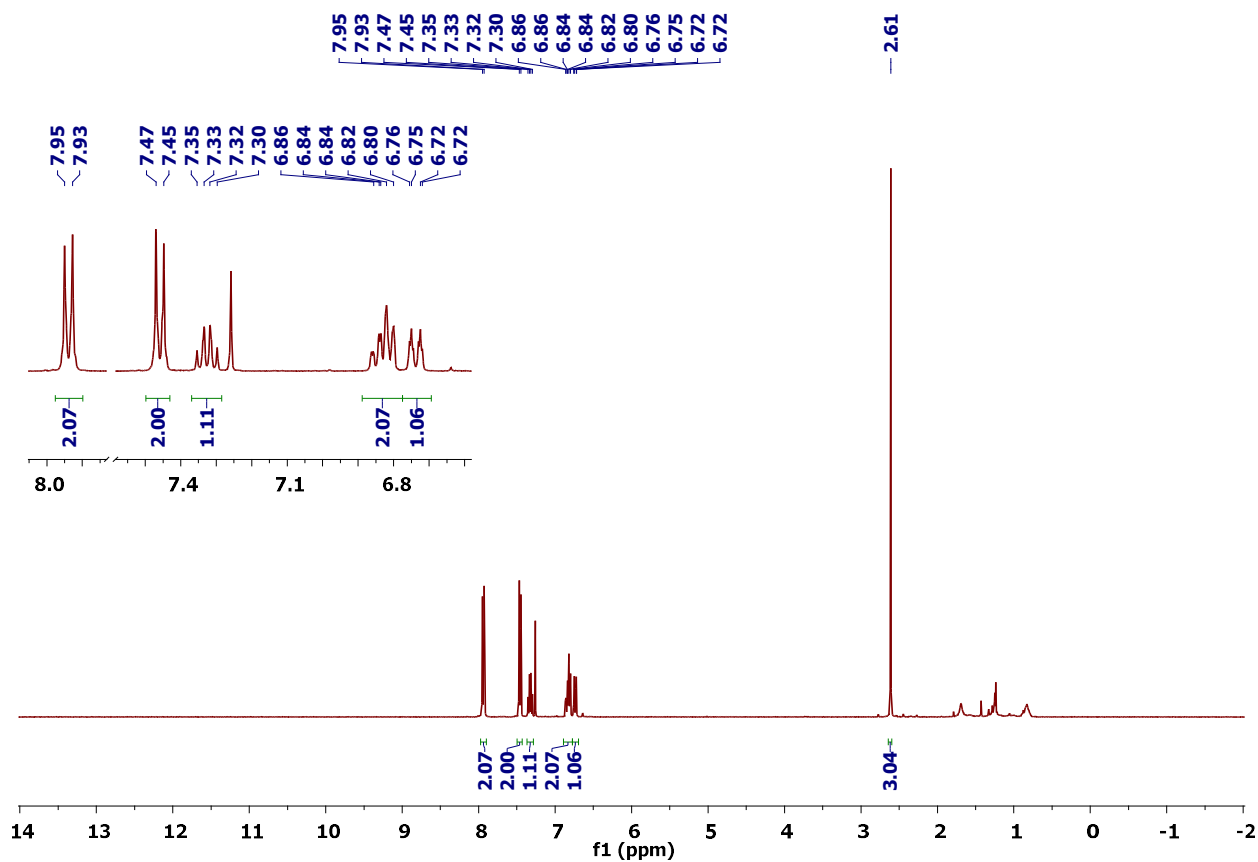

$^{13}\text{C}$  NMR ( $\text{CDCl}_3$ ) spectrum of (Z)-1-(4-(4-chlorophenyl)-5-((3-fluorophenyl)imino)-4,5-dihydro-1,3,4-thiadiazol-2-yl)ethan-1-one

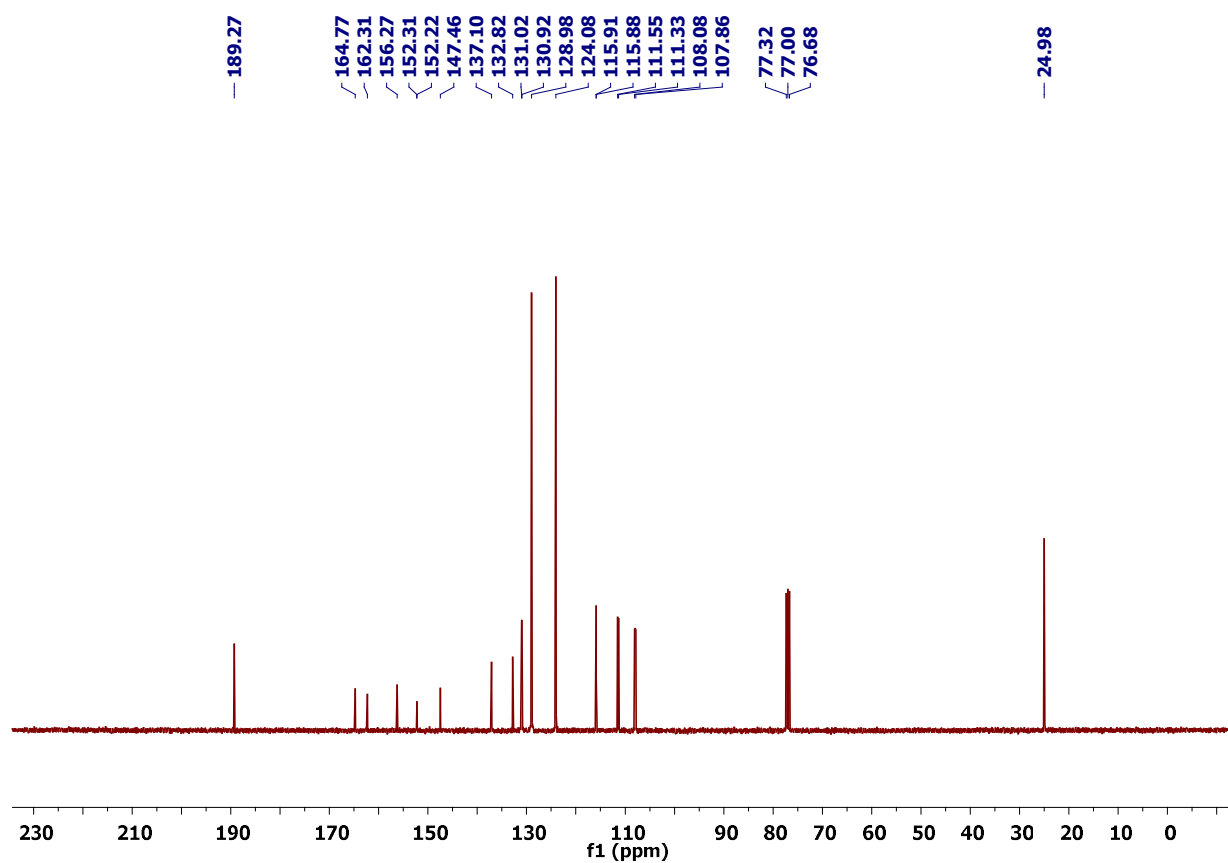

$^{13}\text{C}$  CRAPT NMR ( $\text{CDCl}_3$ ) spectrum of (Z)-1-(4-(4-chlorophenyl)-5-((3-fluorophenyl)imino)-4,5-dihydro-1,3,4-thiadiazol-2-yl)ethan-1-one

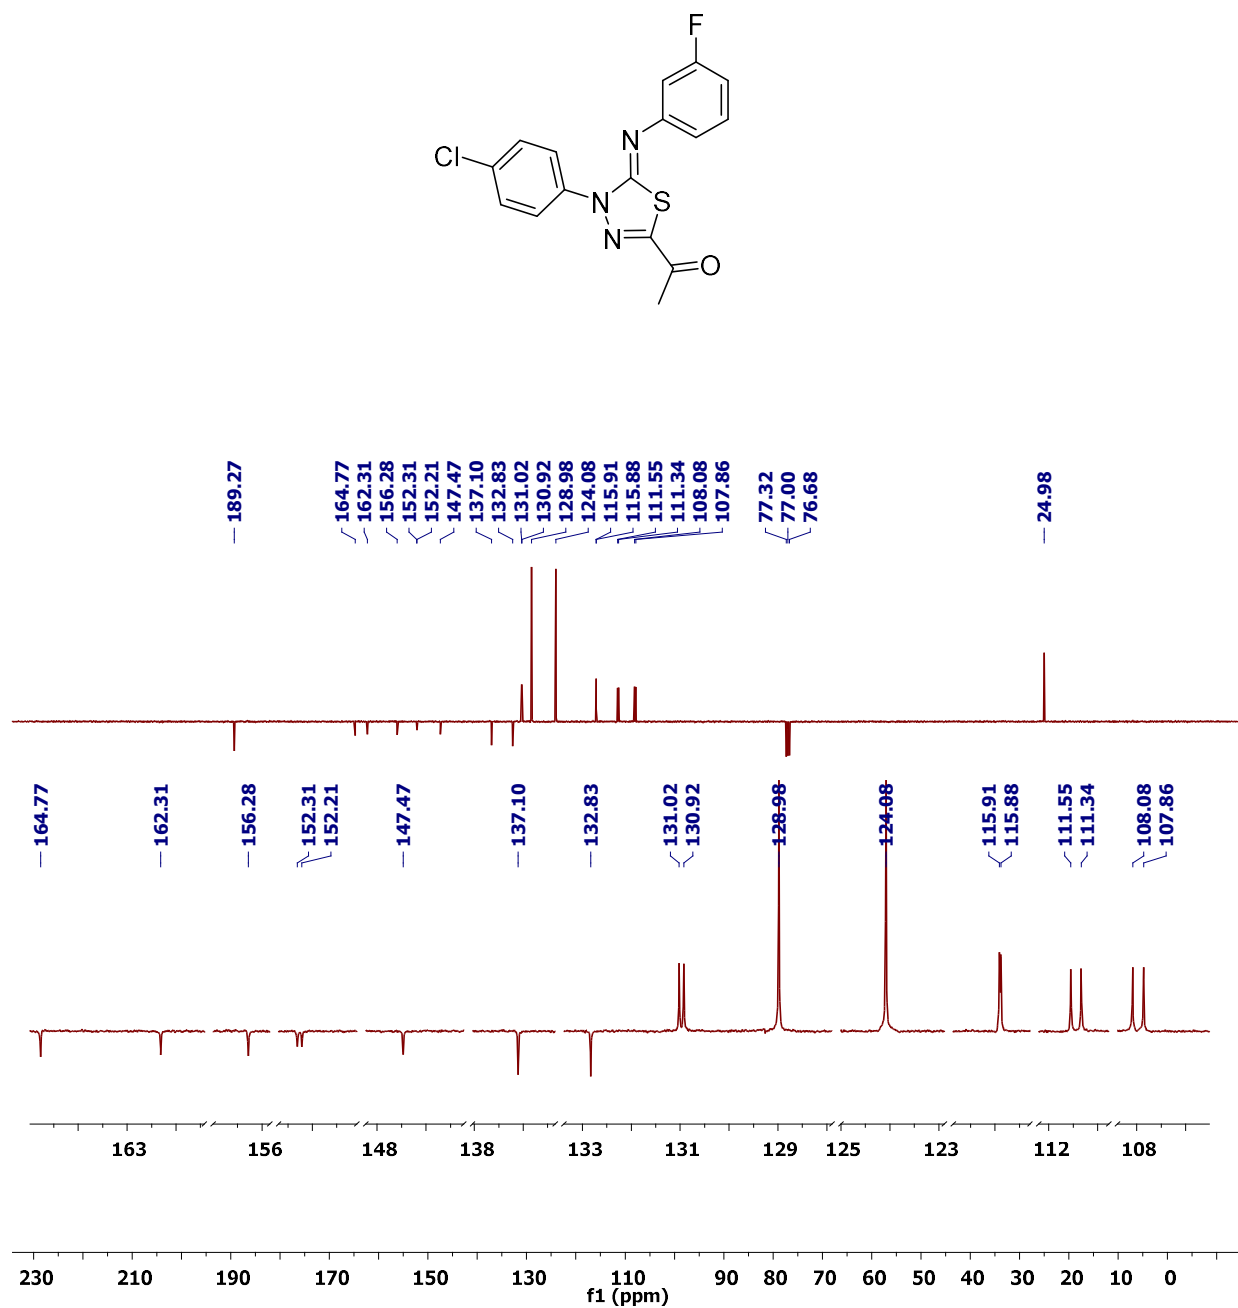



$^1\text{H}$ - $^1\text{H}$  gDQCOSY NMR ( $\text{CDCl}_3$ ) spectrum of (Z)-1-(4-(4-chlorophenyl)-5-((3-fluorophenyl)imino)-4,5-dihydro-1,3,4-thiadiazol-2-yl)ethan-1-one

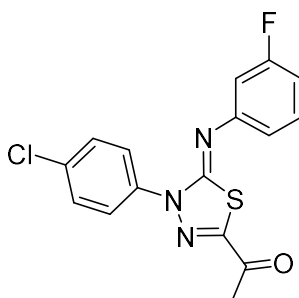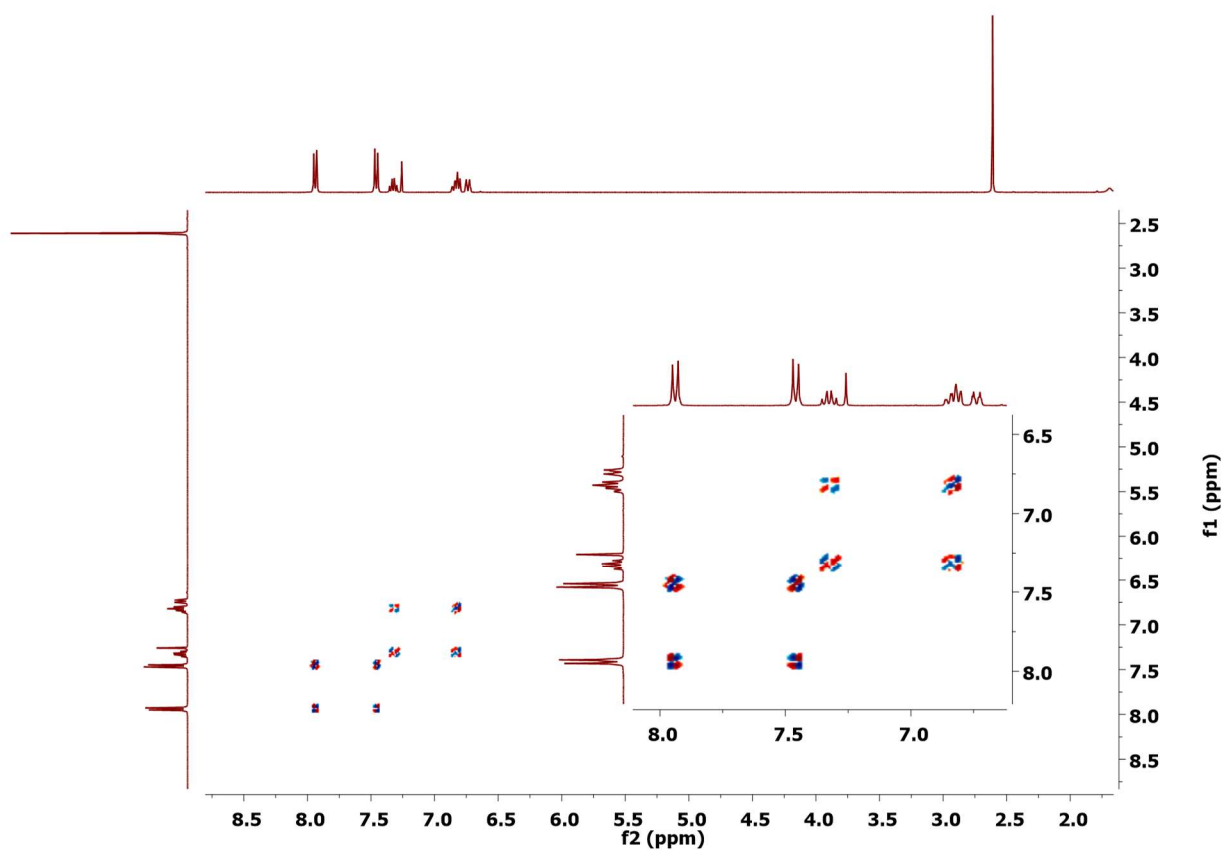

$^1\text{H}$ - $^{13}\text{C}$ -HSQC NMR ( $\text{CDCl}_3$ ) spectrum of (Z)-1-(4-(4-chlorophenyl)-5-((3-fluorophenyl)imino)-4,5-dihydro-1,3,4-thiadiazol-2-yl)ethan-1-one

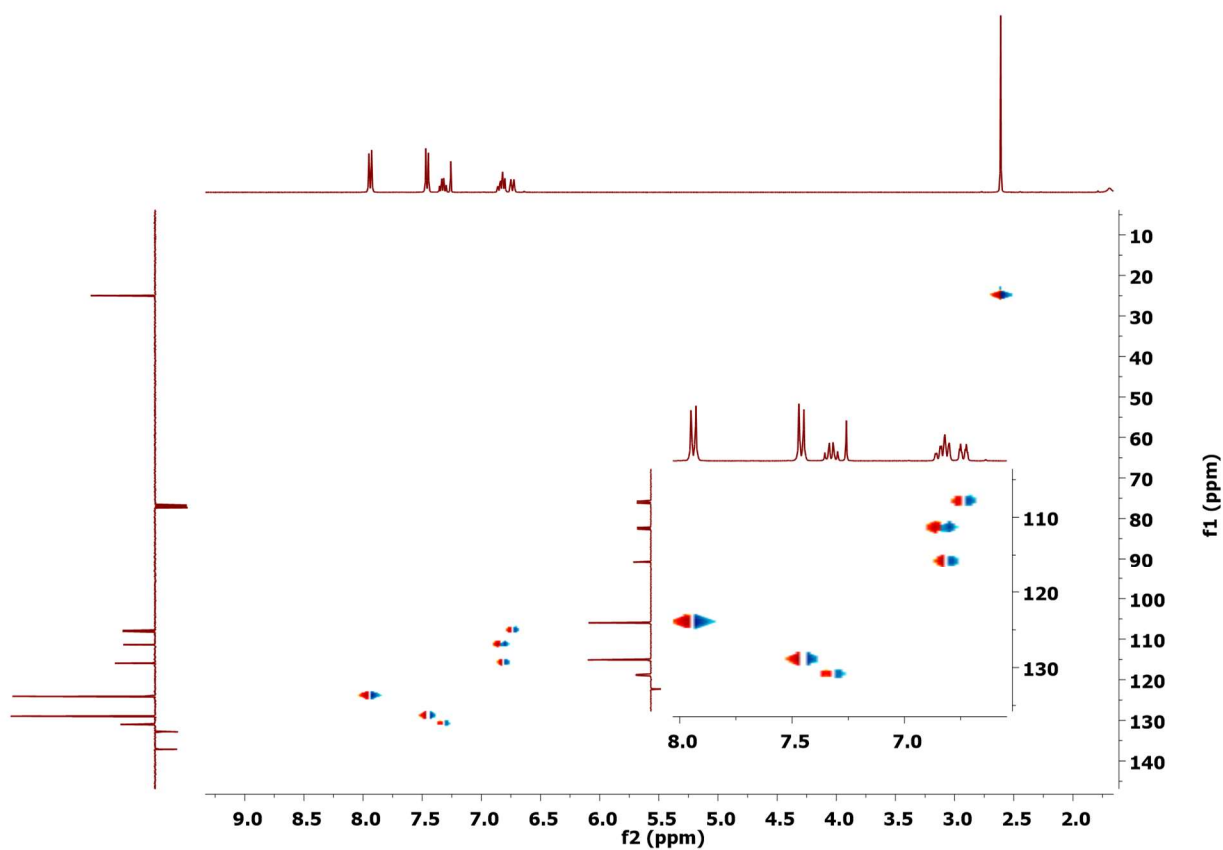

$^1\text{H}$ - $^{13}\text{C}$ -gHMBC NMR ( $\text{CDCl}_3$ ) spectrum of (Z)-1-(4-(4-chlorophenyl)-5-((3-fluorophenyl)imino)-4,5-dihydro-1,3,4-thiadiazol-2-yl)ethan-1-one

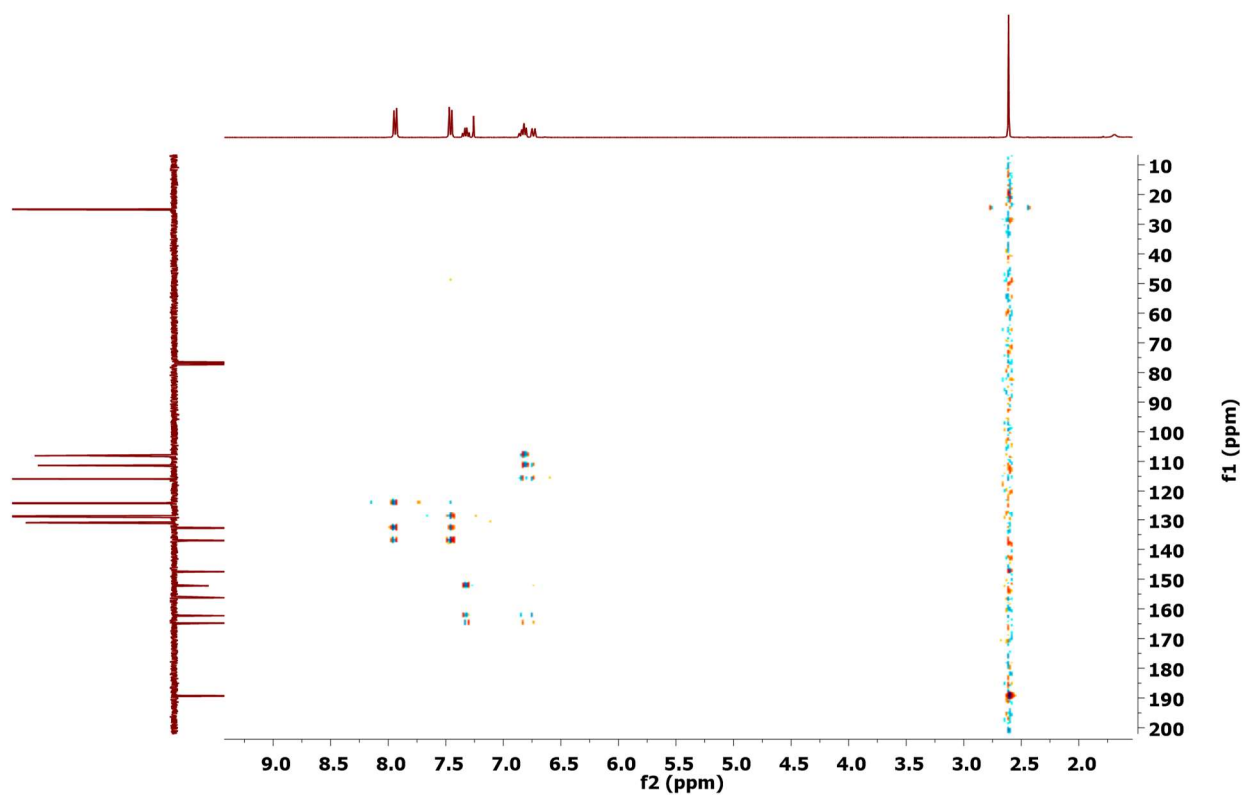

$^1\text{H}$  NMR ( $\text{CDCl}_3$ ) spectrum of (Z)-1-(5-((3-fluorophenyl)imino)-4-(4-iodophenyl)-4,5-dihydro-1,3,4-thiadiazol-2-yl)ethan-1-one

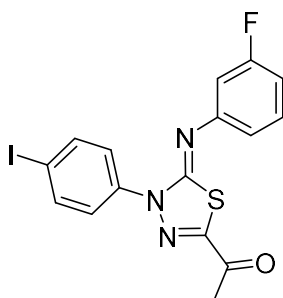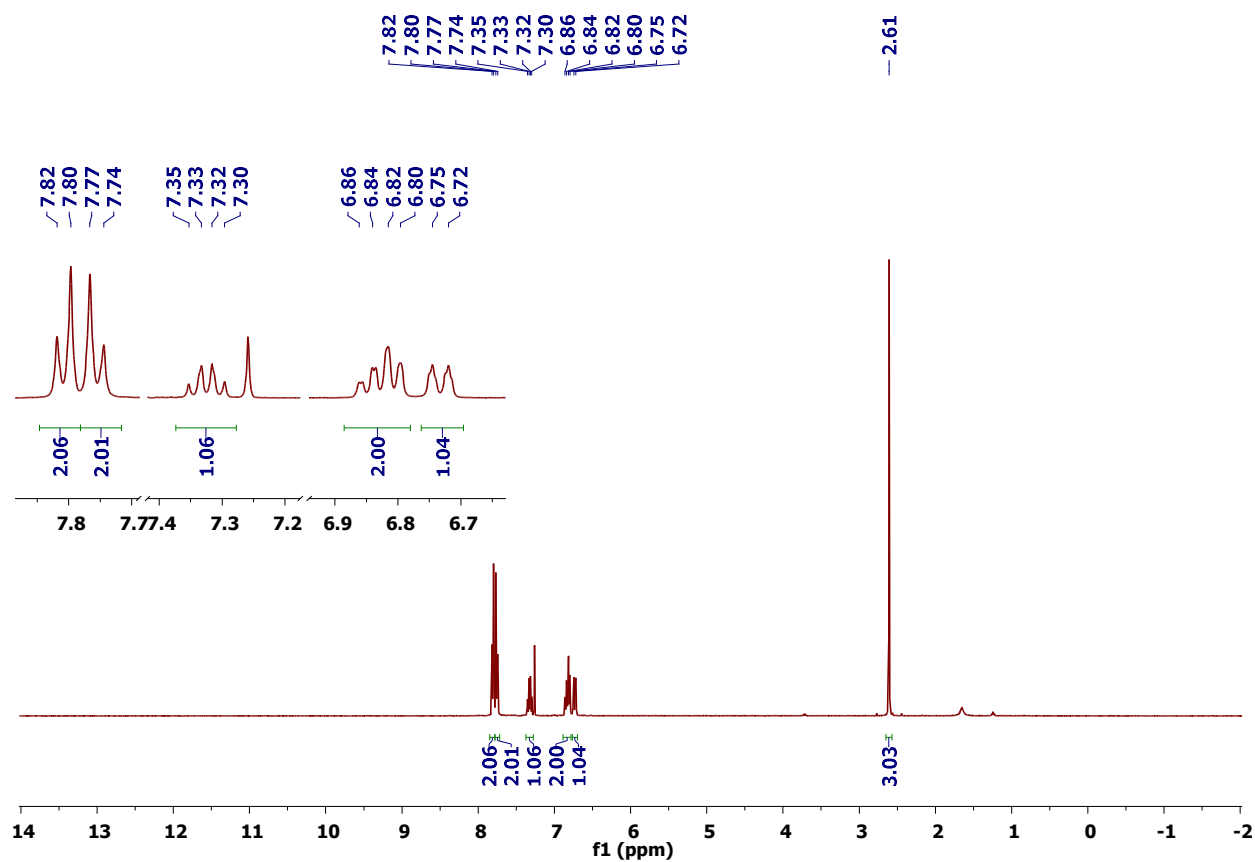

$^{13}\text{C}$  NMR ( $\text{CDCl}_3$ ) spectrum of (Z)-1-(5-((3-fluorophenyl)imino)-4-(4-iodophenyl)-4,5-dihydro-1,3,4-thiadiazol-2-yl)ethan-1-one

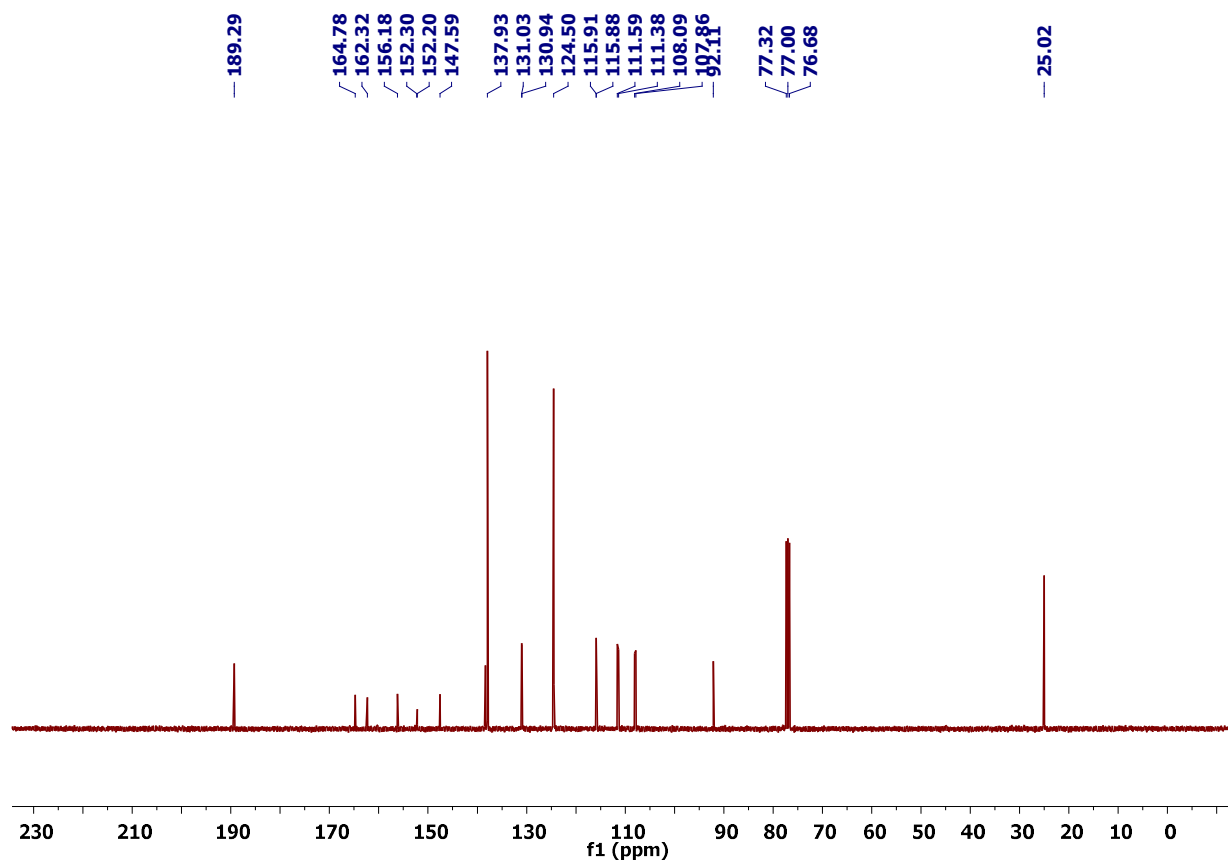

$^{13}\text{C}$  CRAPT NMR ( $\text{CDCl}_3$ ) spectrum of (Z)-1-(5-((3-fluorophenyl)imino)-4-(4-iodophenyl)-4,5-dihydro-1,3,4-thiadiazol-2-yl)ethan-1-one

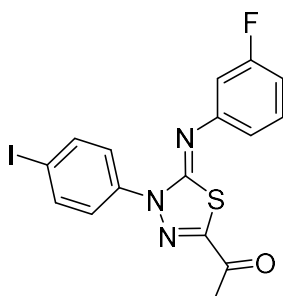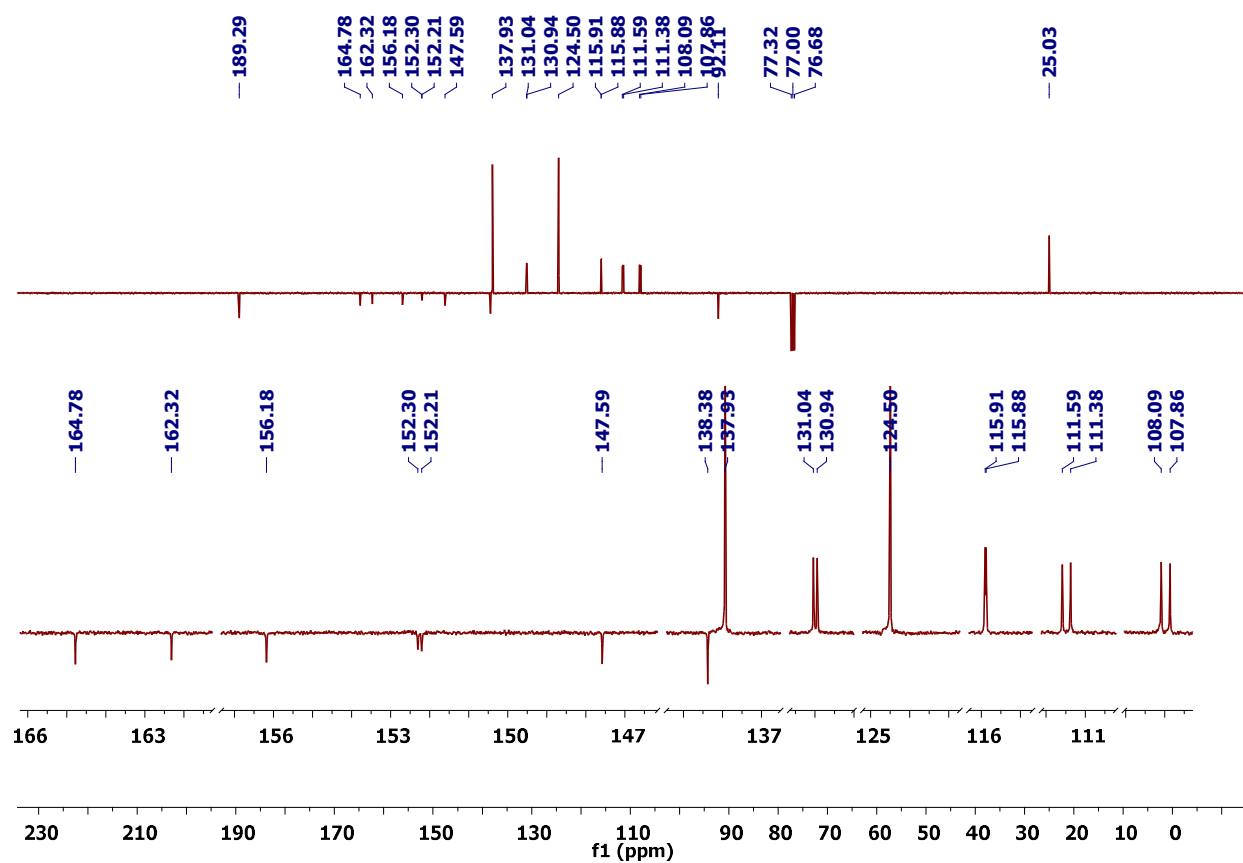

$^1\text{H}$ - $^1\text{H}$  gDQCOSY NMR ( $\text{CDCl}_3$ ) spectrum of (Z)-1-(5-((3-fluorophenyl)imino)-4-(4-iodophenyl)-4,5-dihydro-1,3,4-thiadiazol-2-yl)ethan-1-one

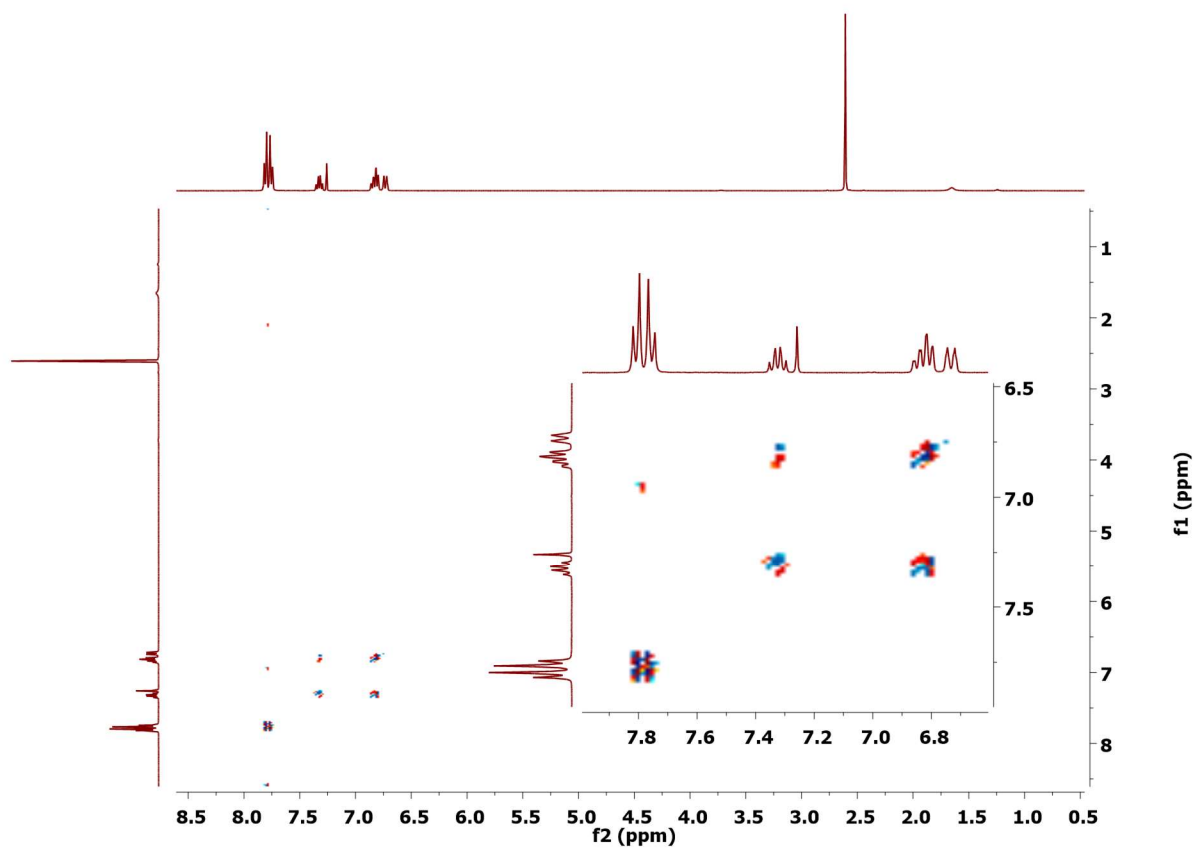

$^1\text{H}$ - $^{13}\text{C}$ -HSQC NMR ( $\text{CDCl}_3$ ) spectrum of (Z)-1-(5-((3-fluorophenyl)imino)-4-(4-iodophenyl)-4,5-dihydro-1,3,4-thiadiazol-2-yl)ethan-1-one

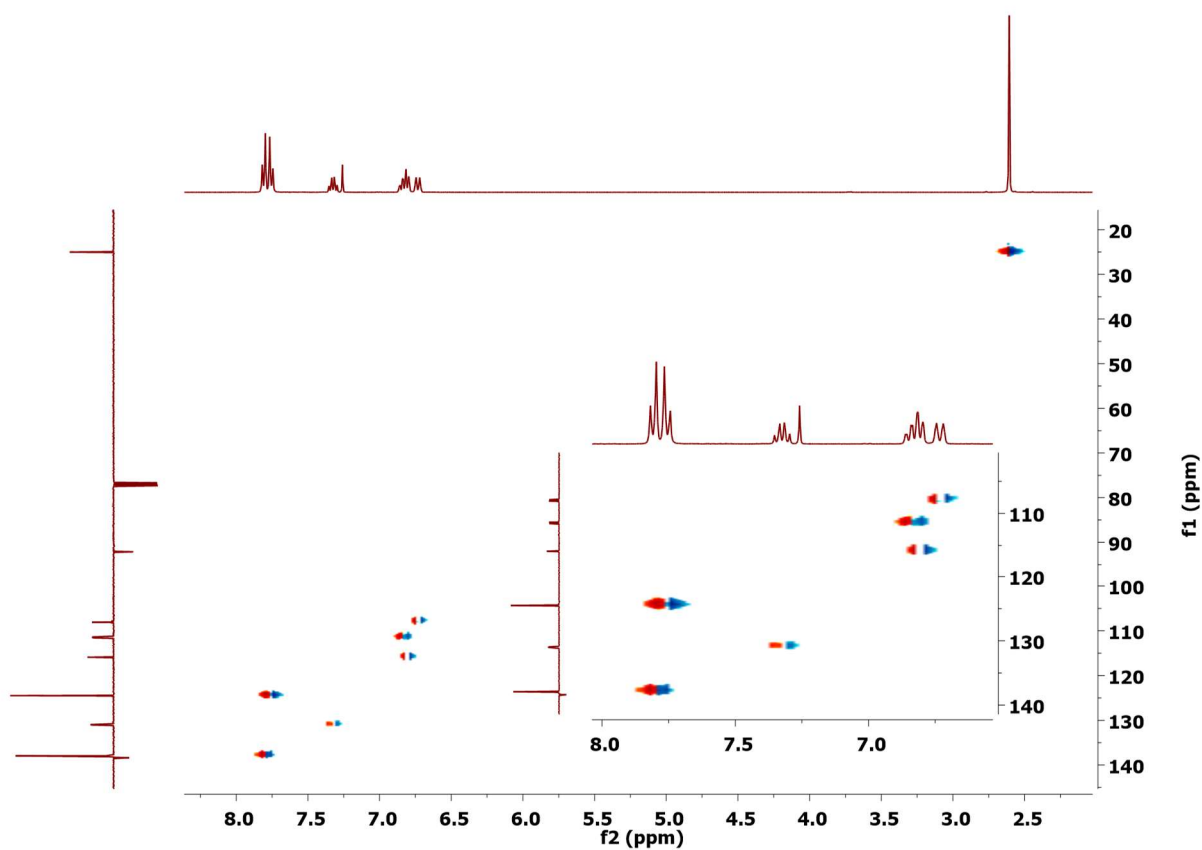



$^1\text{H}$ - $^{13}\text{C}$ -gHMBC NMR ( $\text{CDCl}_3$ ) spectrum of (Z)-1-(5-((3-fluorophenyl)imino)-4-(4-iodophenyl)-4,5-dihydro-1,3,4-thiadiazol-2-yl)ethan-1-one

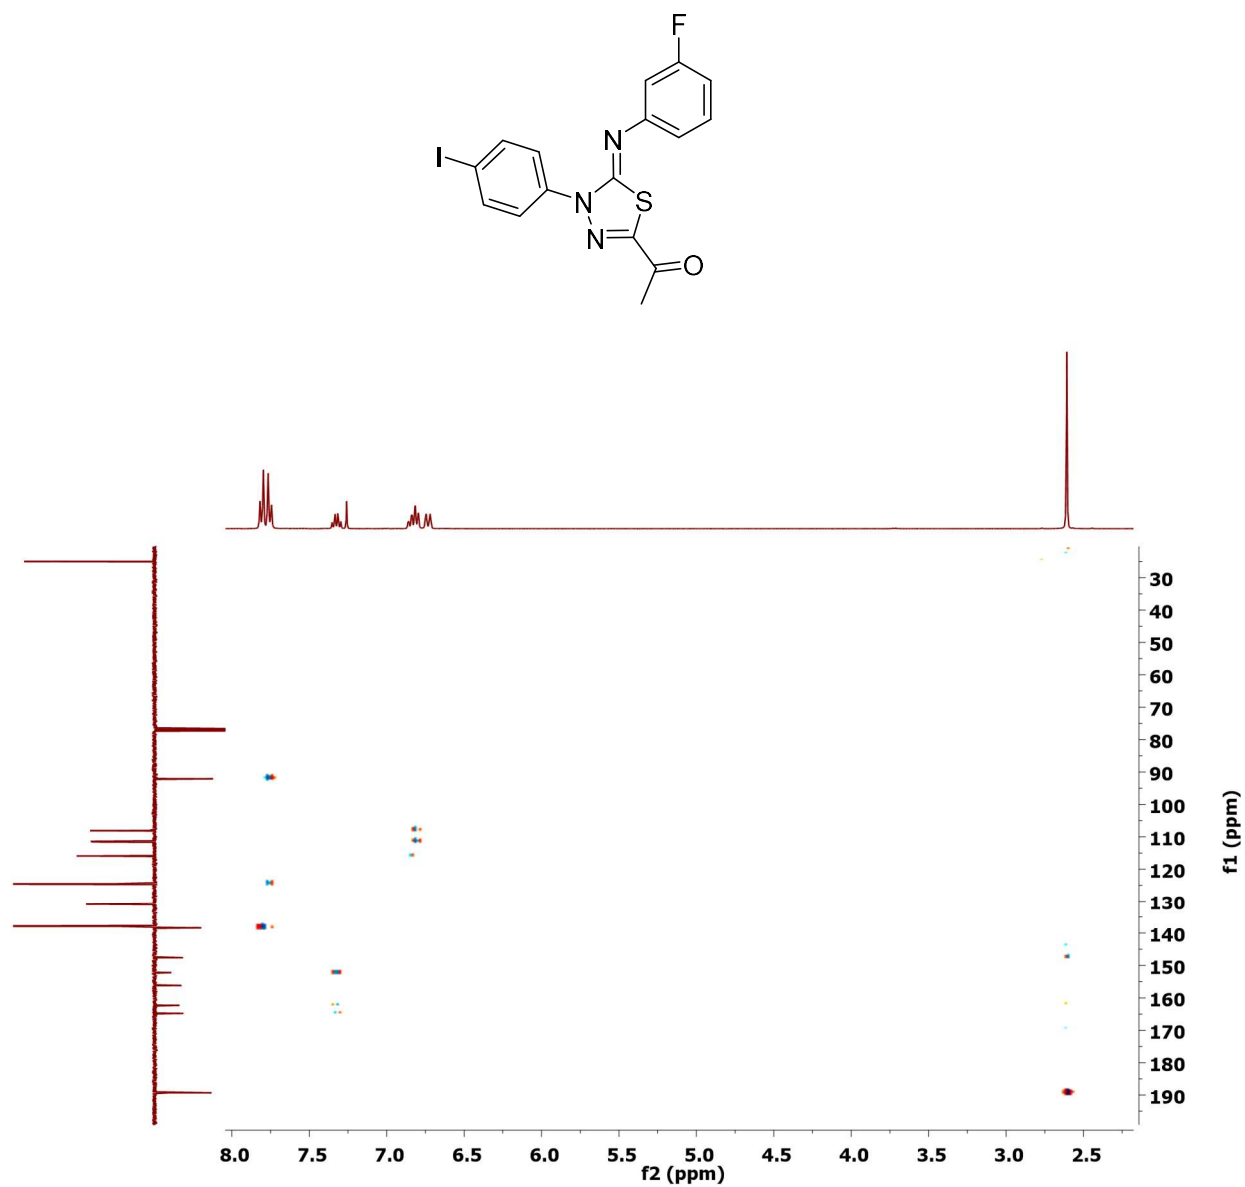

$^1\text{H}$  NMR ( $\text{CDCl}_3$ ) spectrum of (Z)-1-(5-((3-fluorophenyl)imino)-4-(p-tolyl)-4,5-dihydro-1,3,4-thiadiazol-2-yl)ethan-1-one

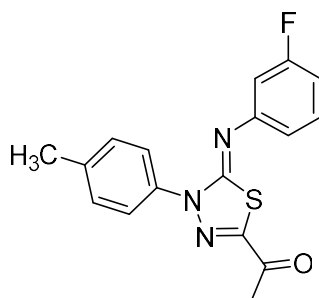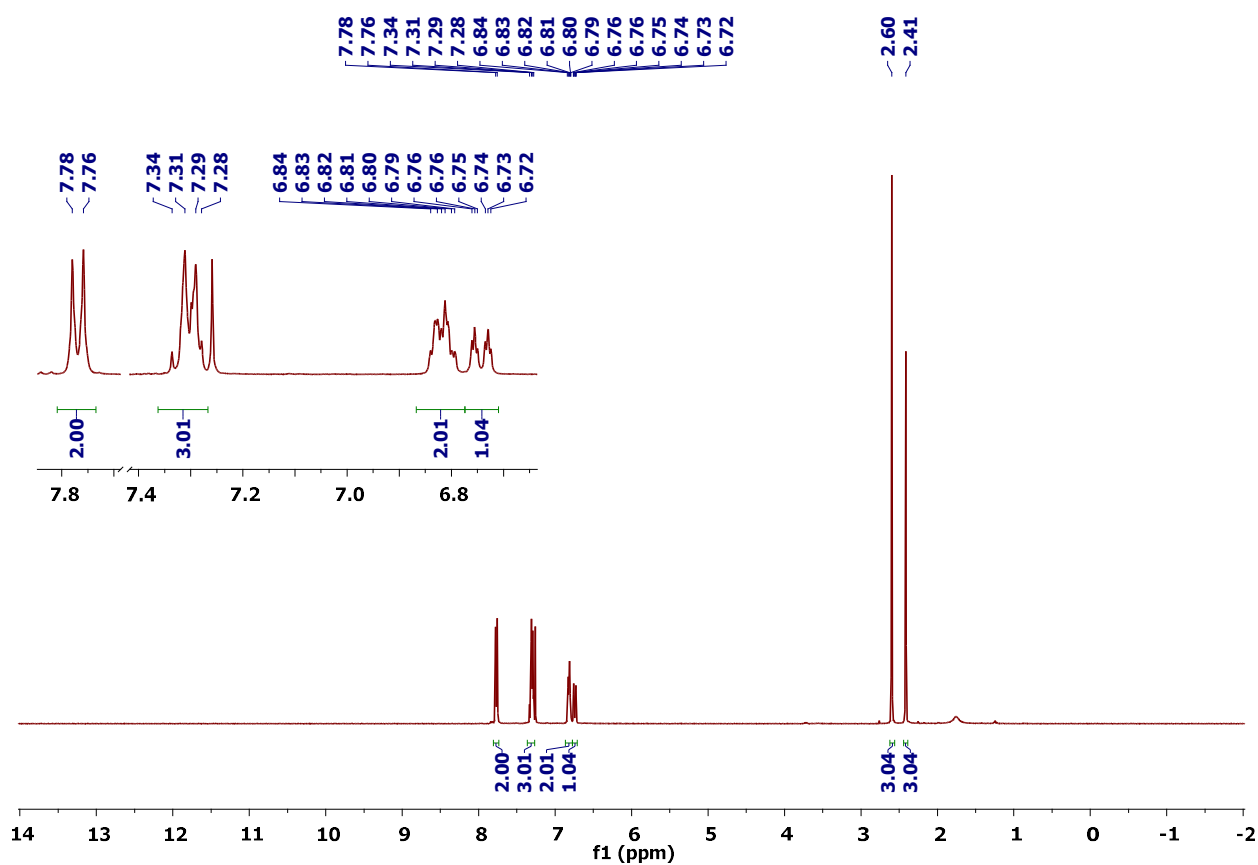

$^{13}\text{C}$  NMR ( $\text{CDCl}_3$ ) spectrum of (Z)-1-(5-((3-fluorophenyl)imino)-4-(p-tolyl)-4,5-dihydro-1,3,4-thiadiazol-2-yl)ethan-1-one

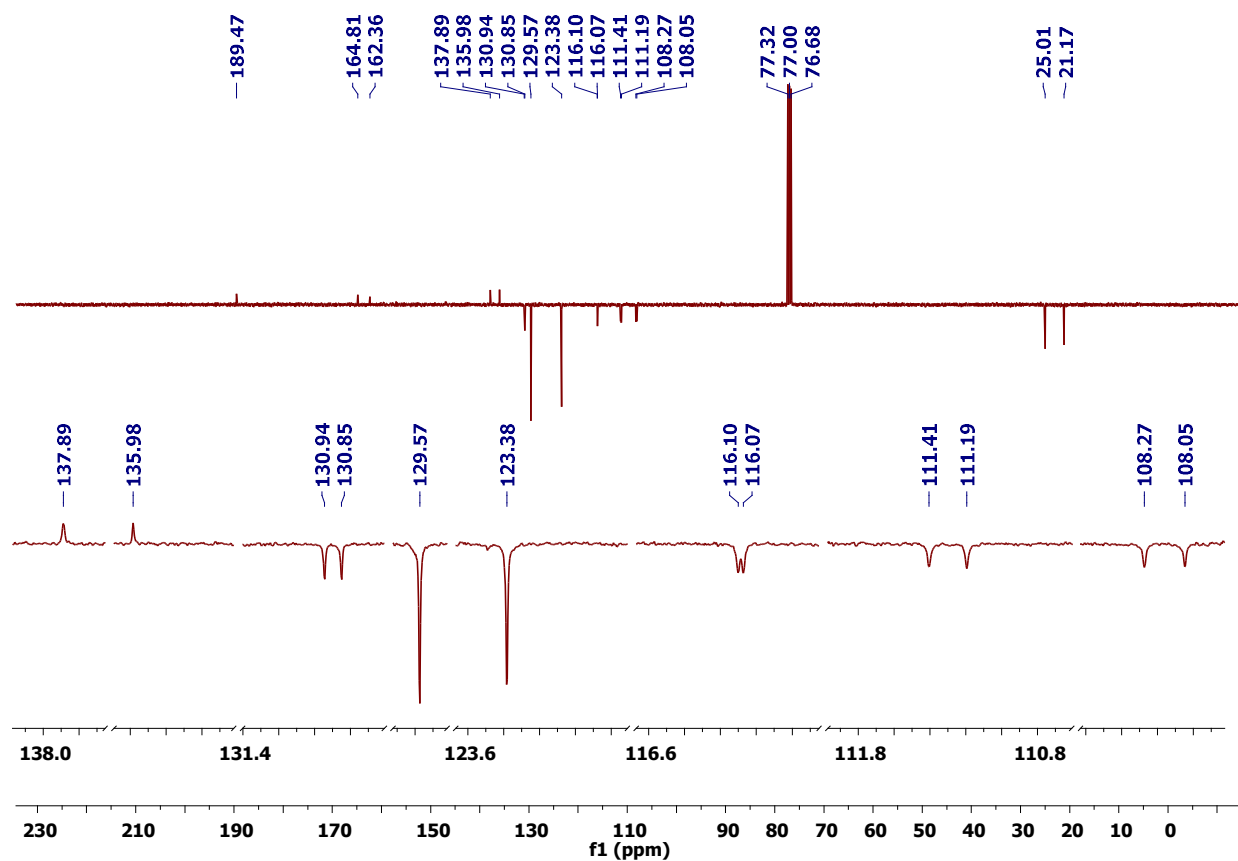

$^{13}\text{C}$  CRAPT NMR ( $\text{CDCl}_3$ ) spectrum of (Z)-1-(5-((3-fluorophenyl)imino)-4-(p-tolyl)-4,5-dihydro-1,3,4-thiadiazol-2-yl)ethan-1-one

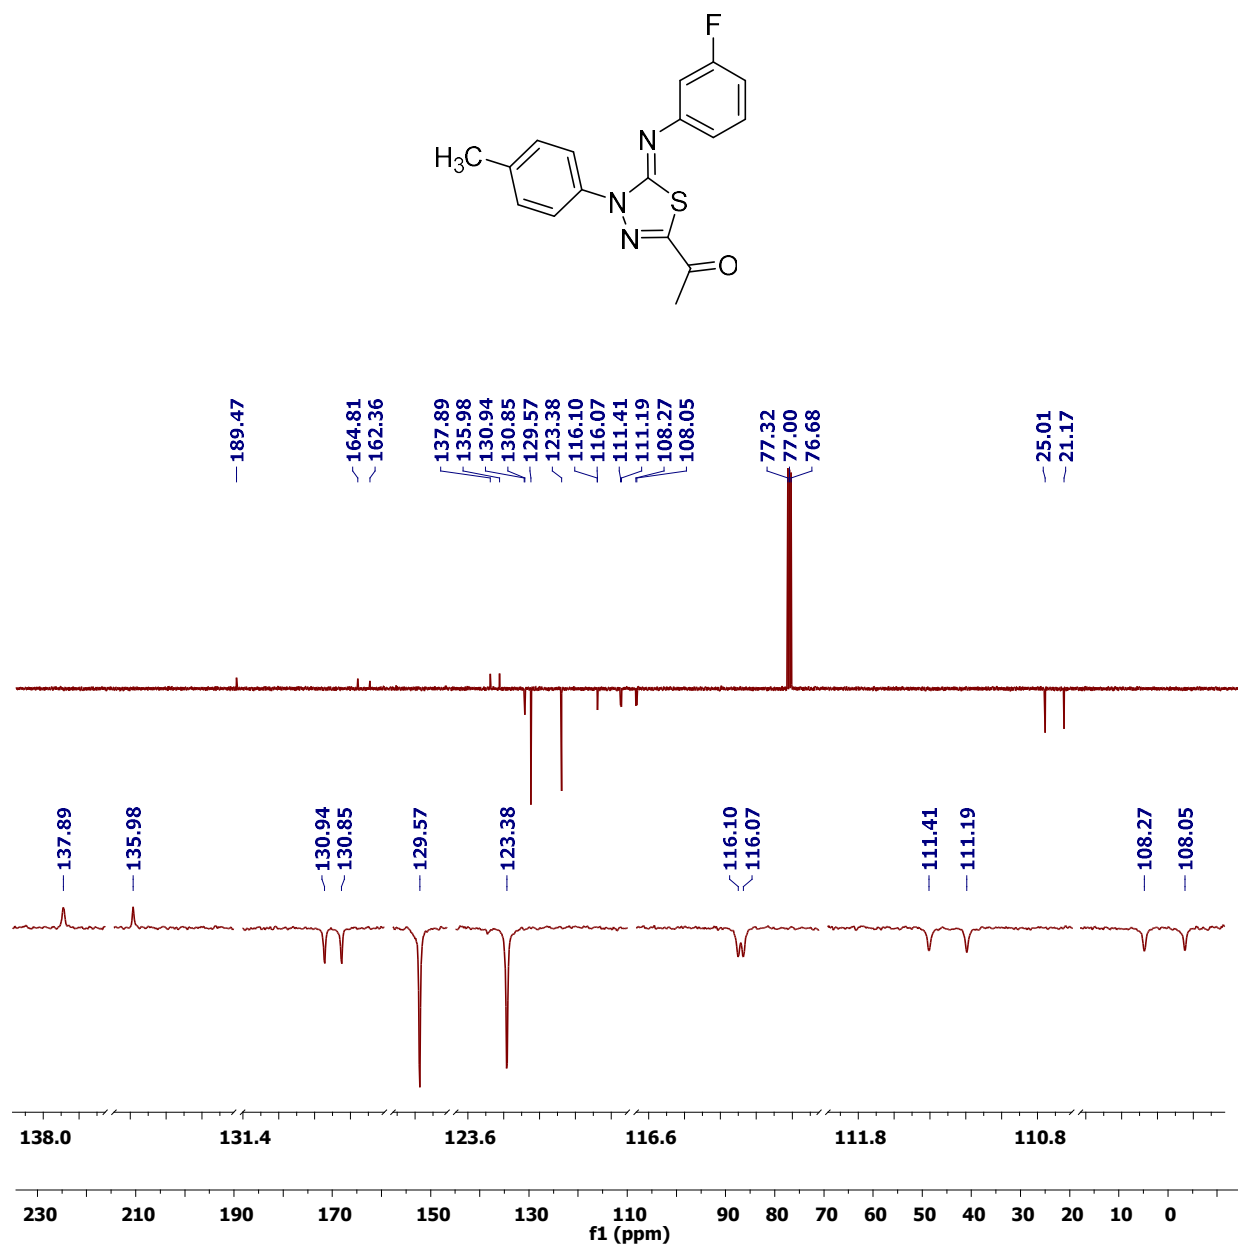

$^1\text{H}$ - $^1\text{H}$  gDQCOSY NMR ( $\text{CDCl}_3$ ) spectrum of (Z)-1-(5-((3-fluorophenyl)imino)-4-(p-tolyl)-4,5-dihydro-1,3,4-thiadiazol-2-yl)ethan-1-one

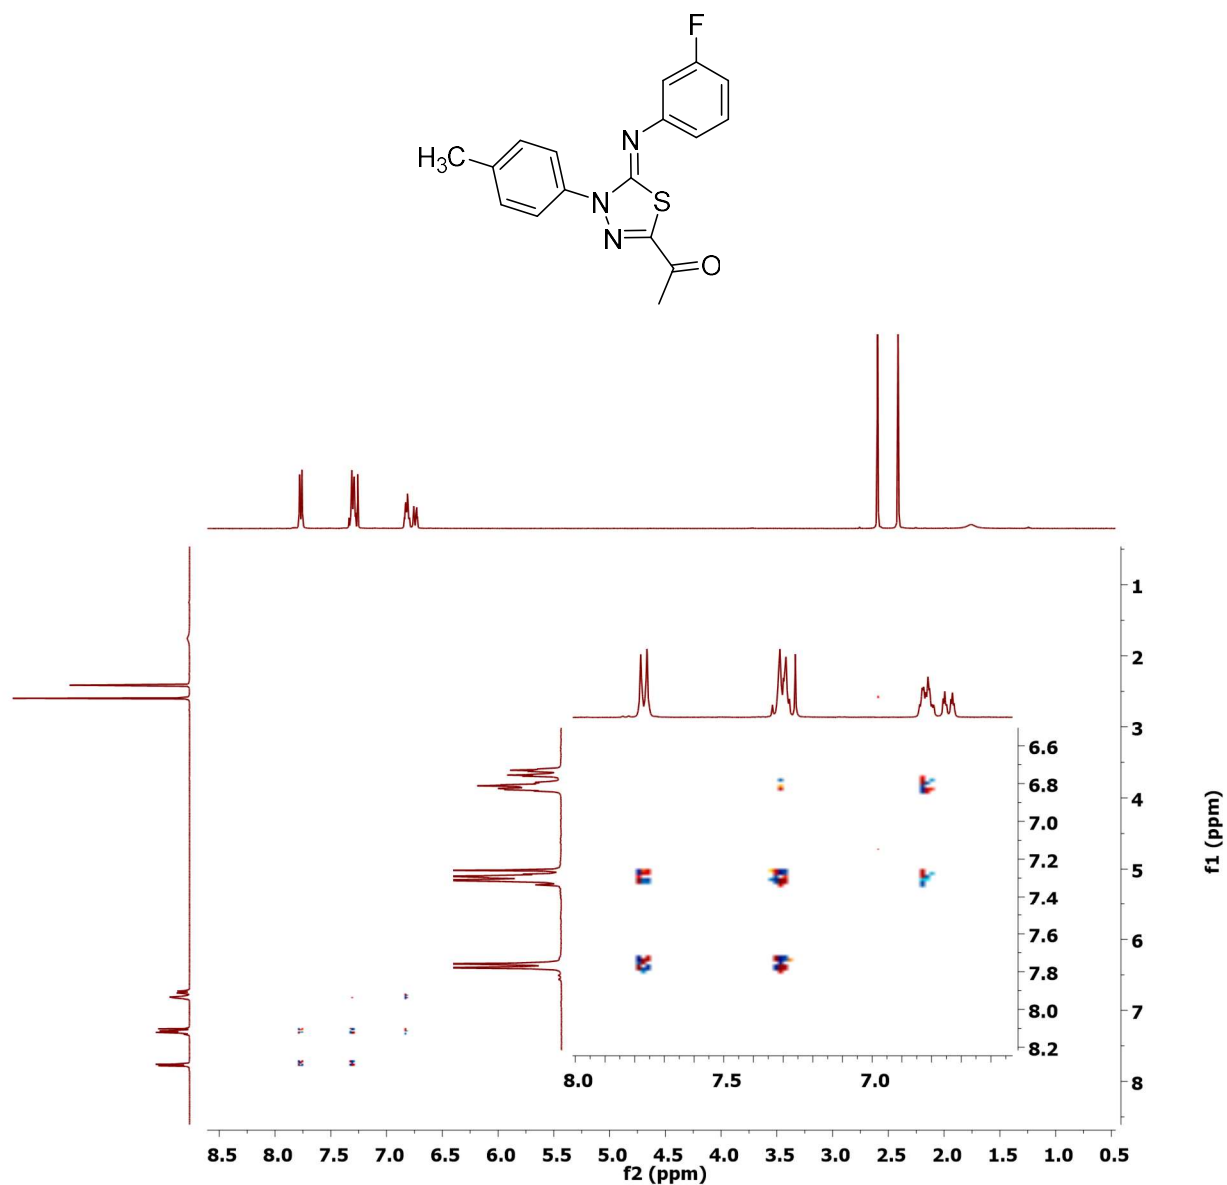

$^1\text{H}$  NMR ( $\text{CDCl}_3$ ) spectrum of (Z)-1-(4-(4-bromophenyl)-5-((2-fluorophenyl)imino)-4,5-dihydro-1,3,4-thiadiazol-2-yl)ethan-1-one

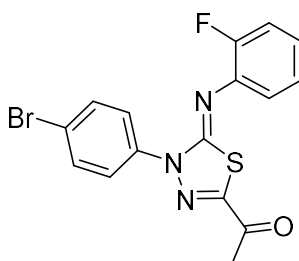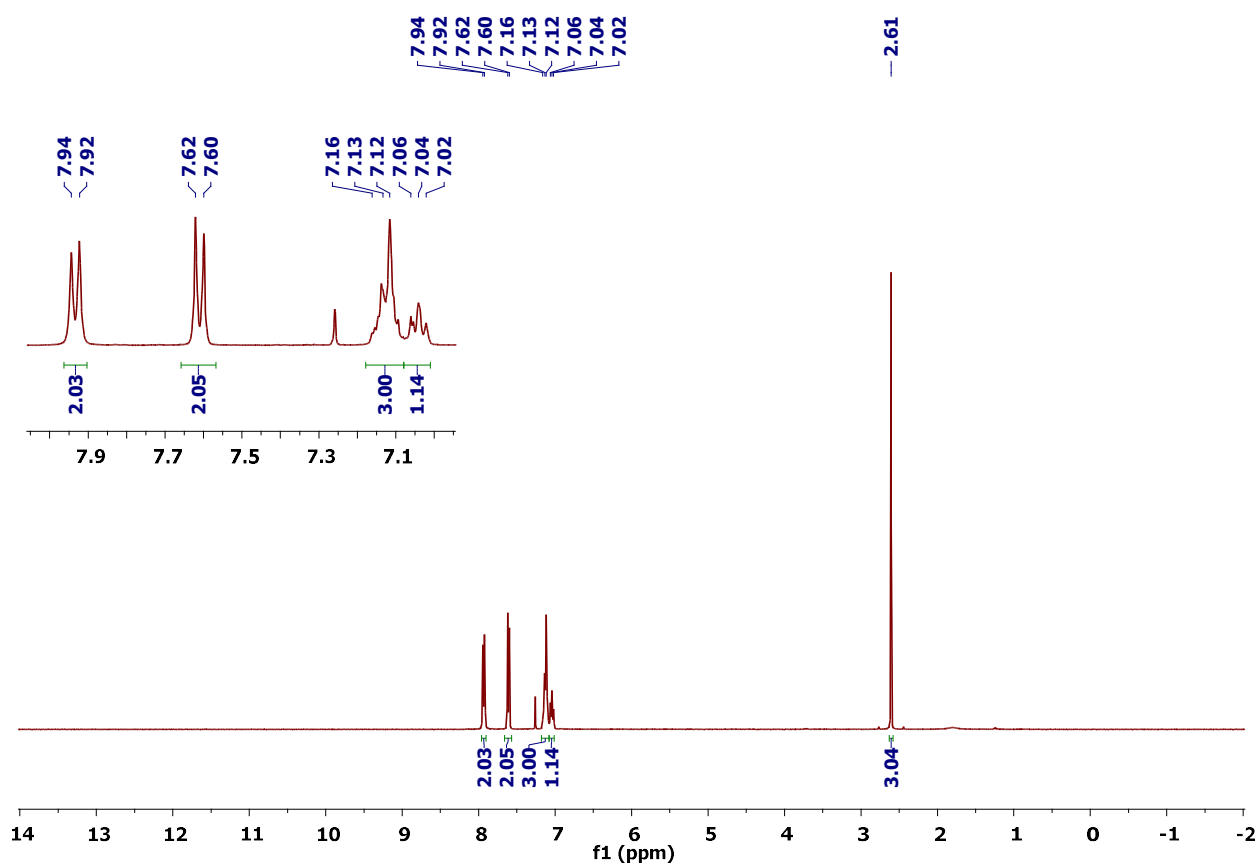

$^{13}\text{C}$  NMR ( $\text{CDCl}_3$ ) spectrum of (Z)-1-(4-(4-bromophenyl)-5-((2-fluorophenyl)imino)-4,5-dihydro-1,3,4-thiadiazol-2-yl)ethan-1-one

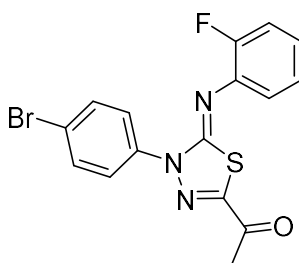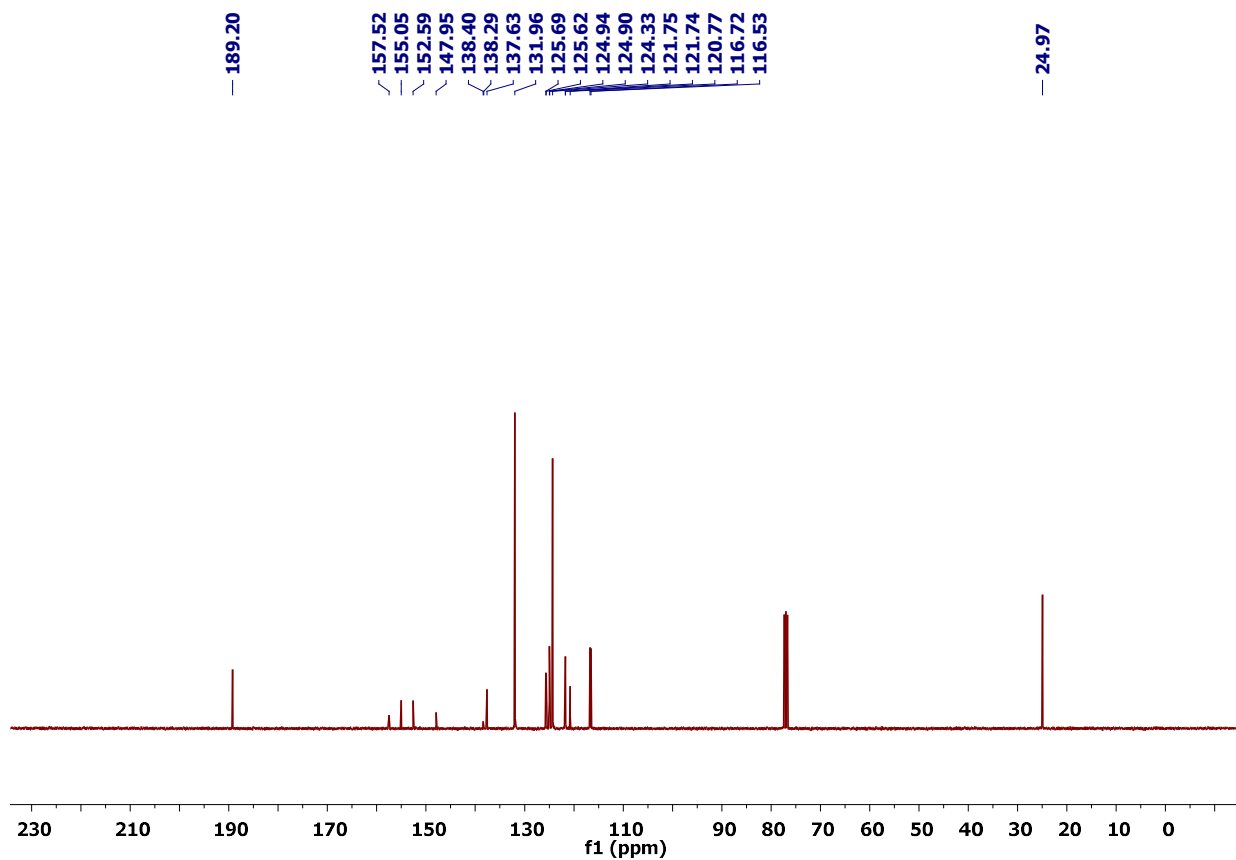

$^{13}\text{C}$  CRAPT NMR ( $\text{CDCl}_3$ ) spectrum of (Z)-1-(4-(4-bromophenyl)-5-((2-fluorophenyl)imino)-4,5-dihydro-1,3,4-thiadiazol-2-yl)ethan-1-one

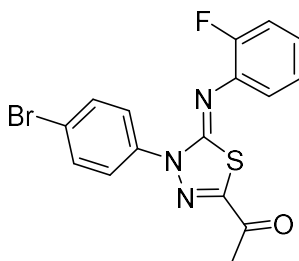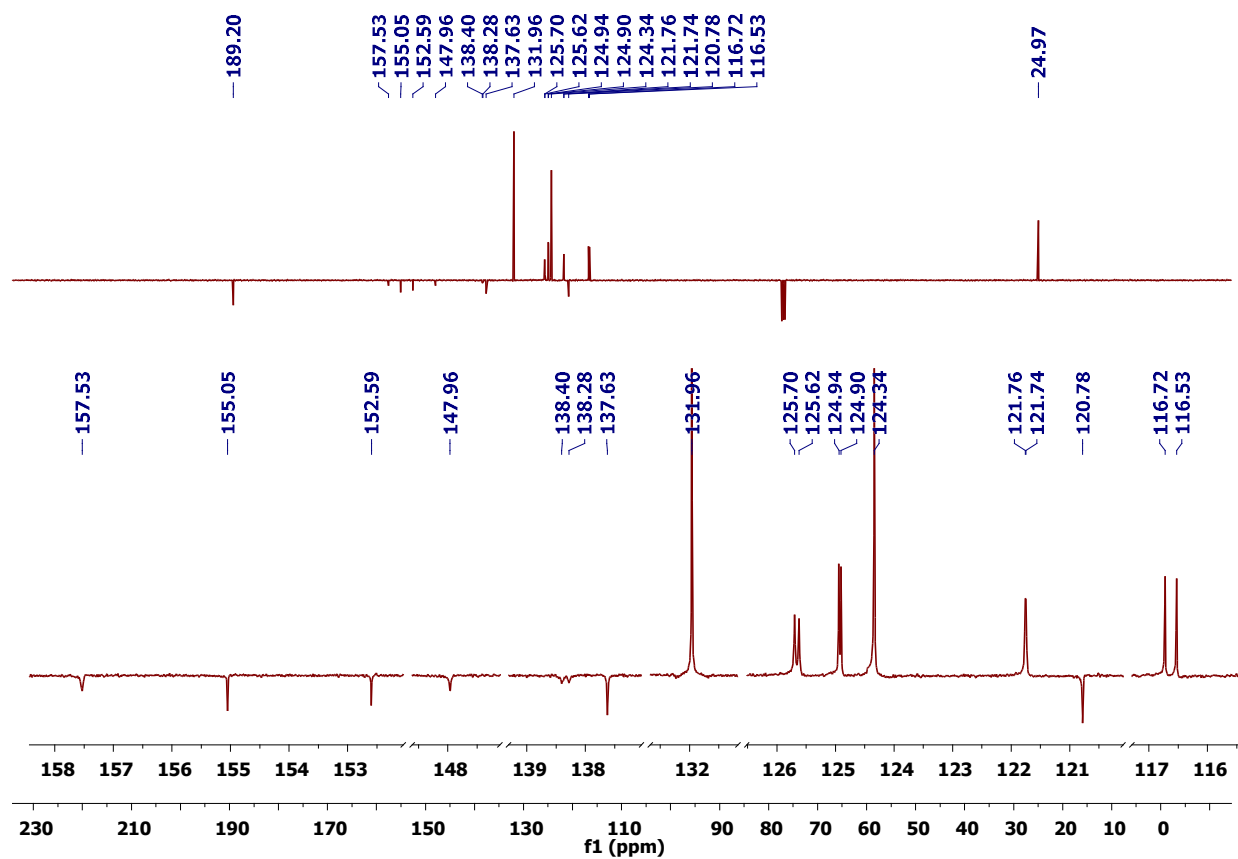



$^1\text{H}$ - $^1\text{H}$  gDQCOSY NMR ( $\text{CDCl}_3$ ) spectrum of (Z)-1-(4-(4-bromophenyl)-5-((2-fluorophenyl)imino)-4,5-dihydro-1,3,4-thiadiazol-2-yl)ethan-1-one

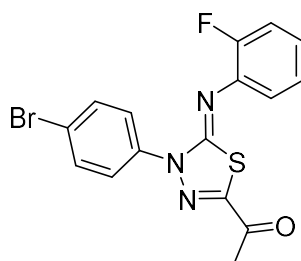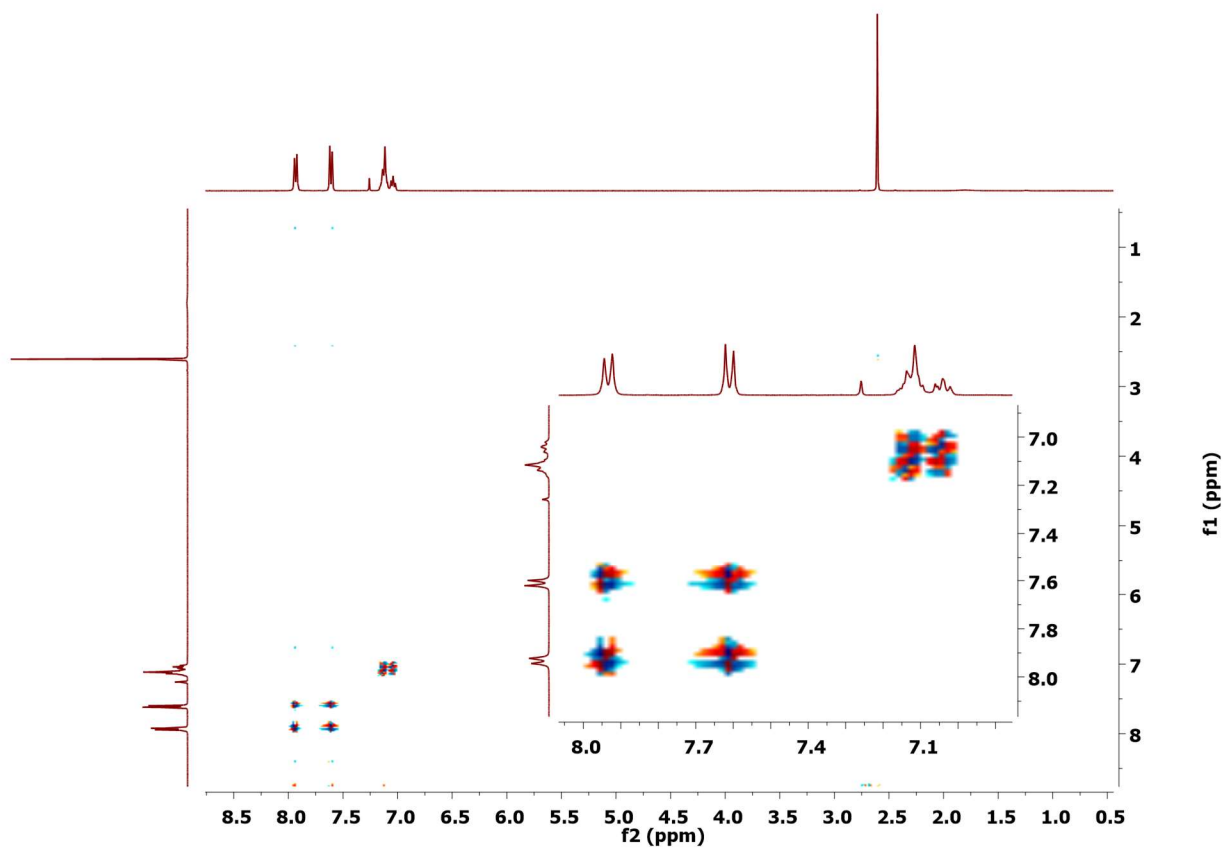

$^1\text{H}$ - $^{13}\text{C}$ -HSQC NMR ( $\text{CDCl}_3$ ) spectrum of (Z)-1-(4-(4-bromophenyl)-5-((2-fluorophenyl)imino)-4,5-dihydro-1,3,4-thiadiazol-2-yl)ethan-1-one

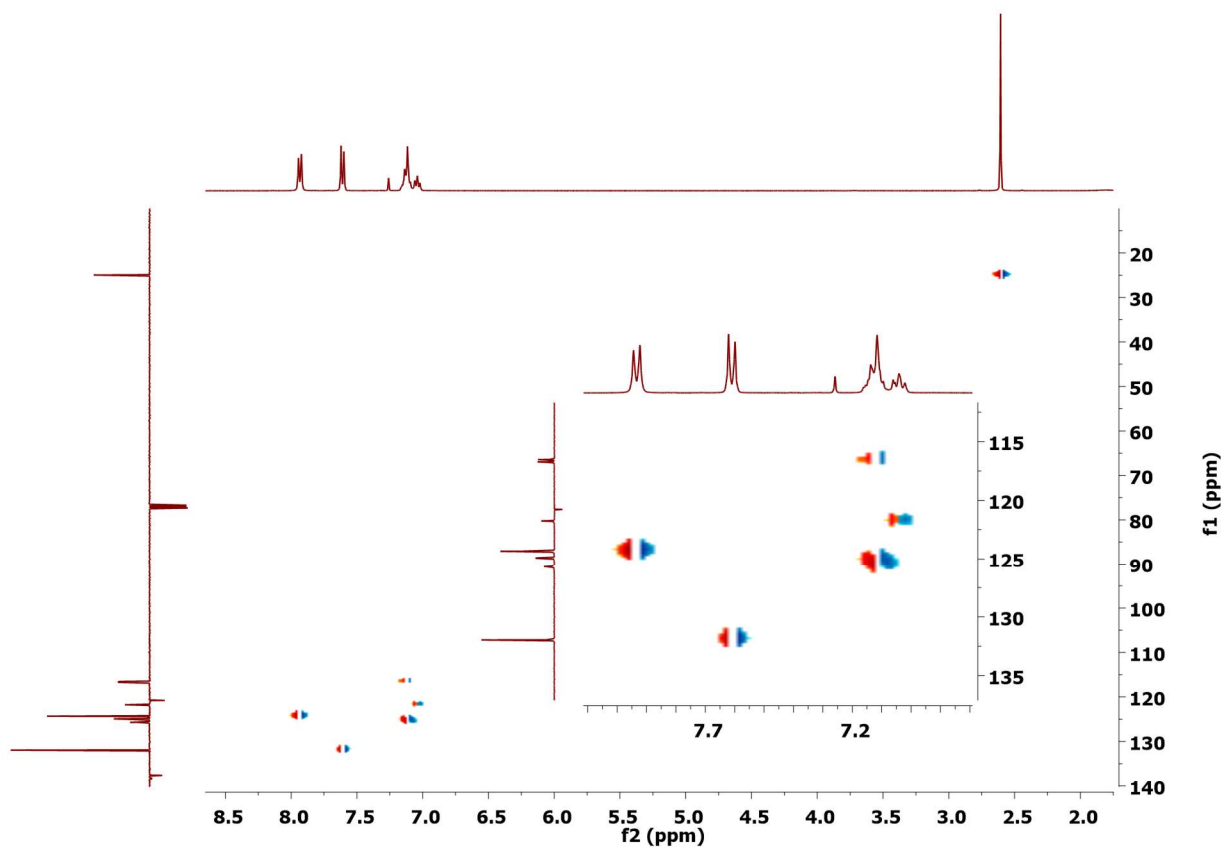

$^1\text{H}$ - $^{13}\text{C}$ -gHMBC NMR ( $\text{CDCl}_3$ ) spectrum of (Z)-1-(4-(4-bromophenyl)-5-((2-fluorophenyl)imino)-4,5-dihydro-1,3,4-thiadiazol-2-yl)ethan-1-one

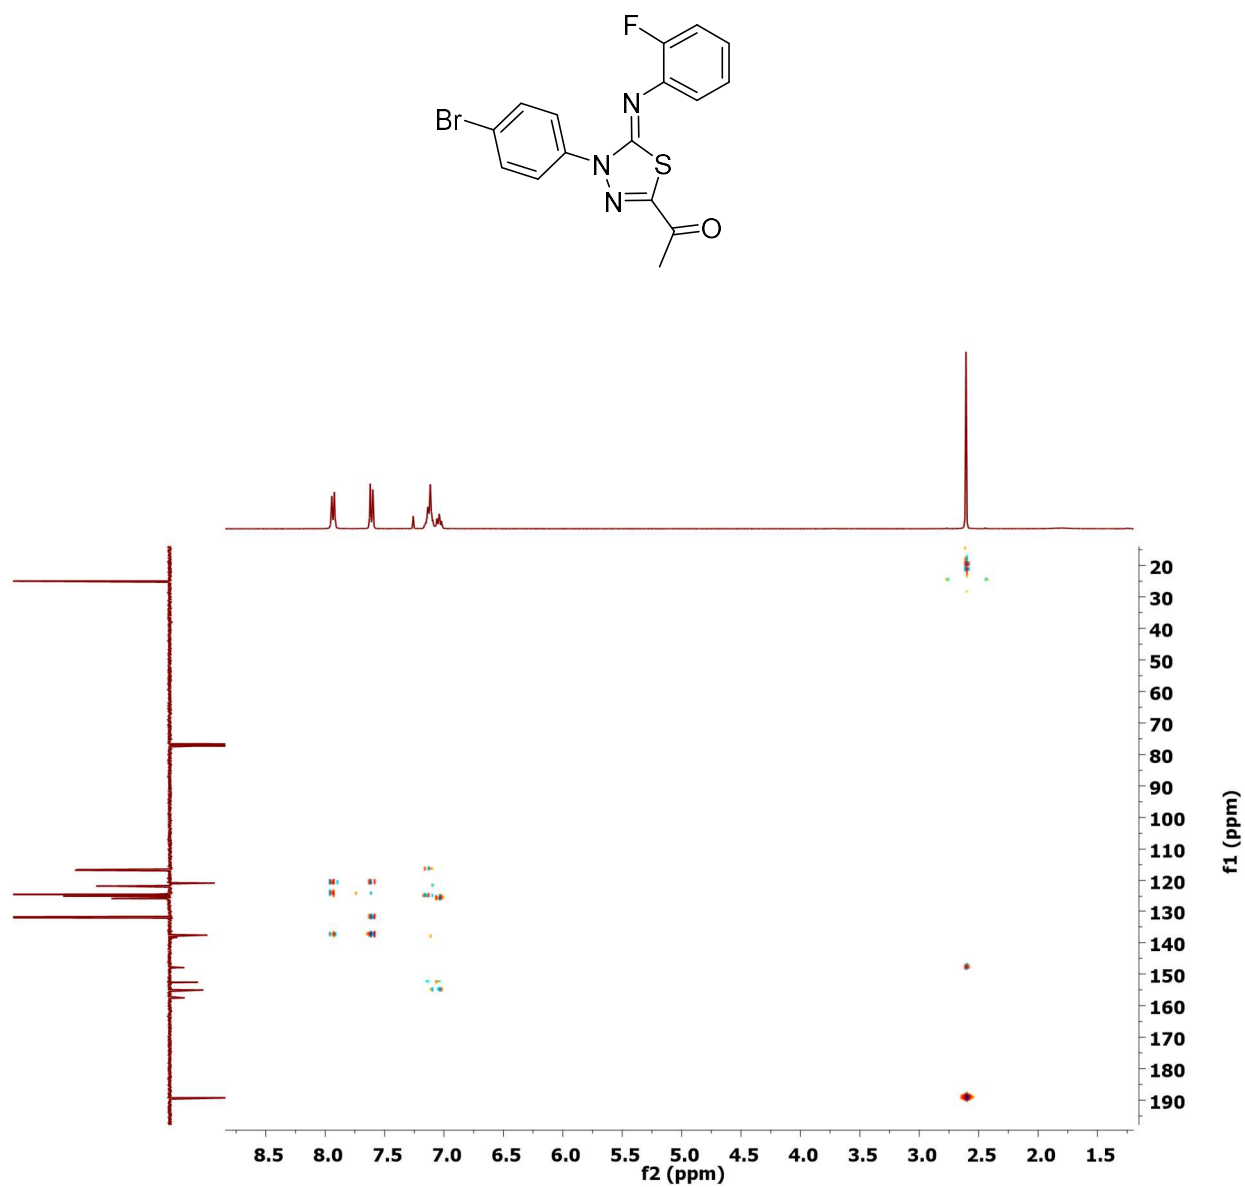

$^1\text{H}$  NMR ( $\text{CDCl}_3$ ) spectrum of (Z)-1-(4-(4-chlorophenyl)-5-((2-fluorophenyl)imino)-4,5-dihydro-1,3,4-thiadiazol-2-yl)ethan-1-one

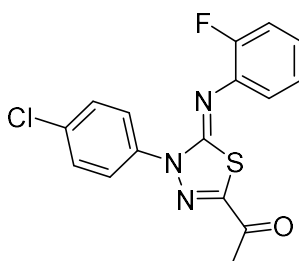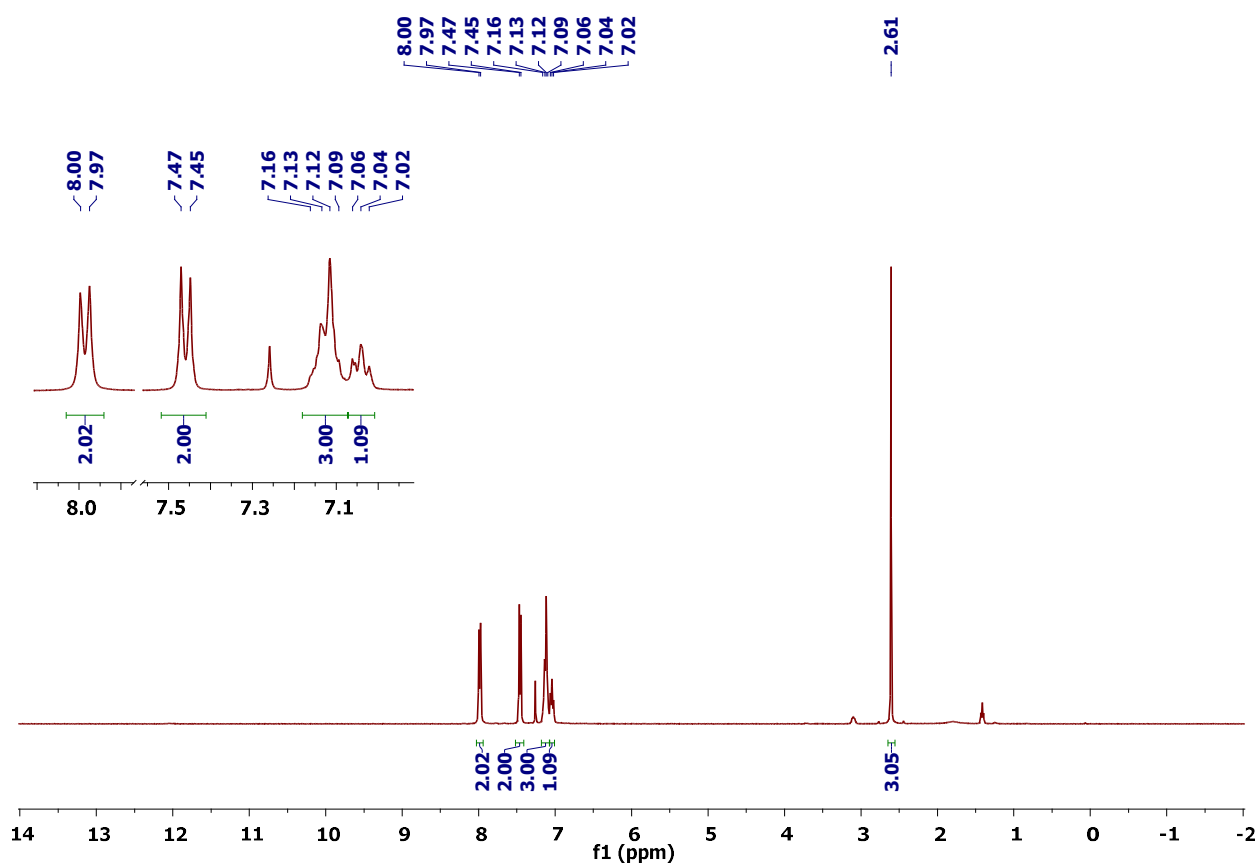

$^{13}\text{C}$  NMR ( $\text{CDCl}_3$ ) spectrum of (Z)-1-(4-(4-chlorophenyl)-5-((2-fluorophenyl)imino)-4,5-dihydro-1,3,4-thiadiazol-2-yl)ethan-1-one

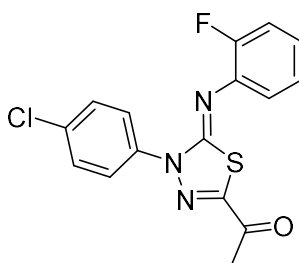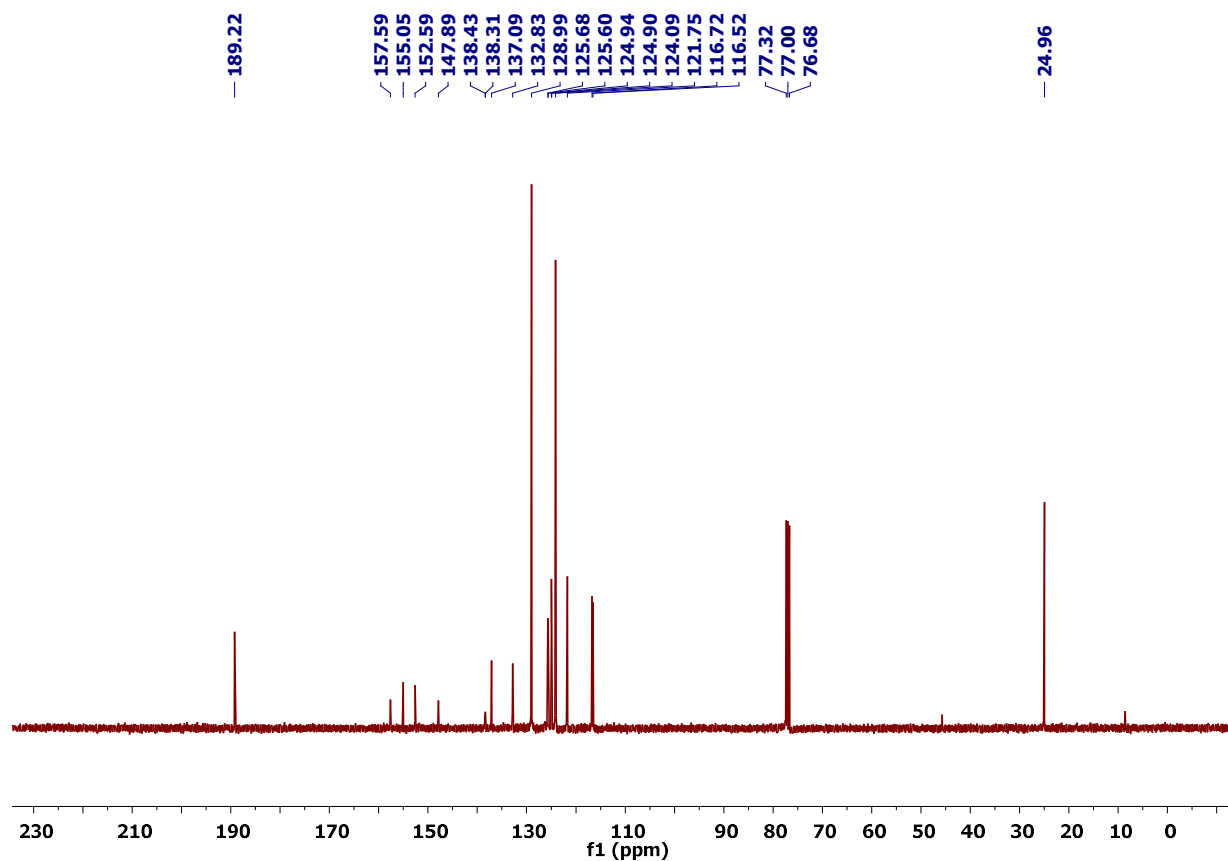

$^{13}\text{C}$  CRAPT NMR ( $\text{CDCl}_3$ ) spectrum of (Z)-1-(4-(4-chlorophenyl)-5-((2-fluorophenyl)imino)-4,5-dihydro-1,3,4-thiadiazol-2-yl)ethan-1-one

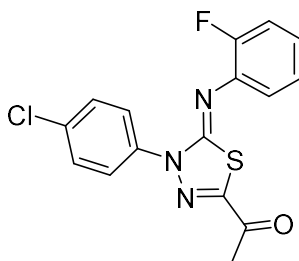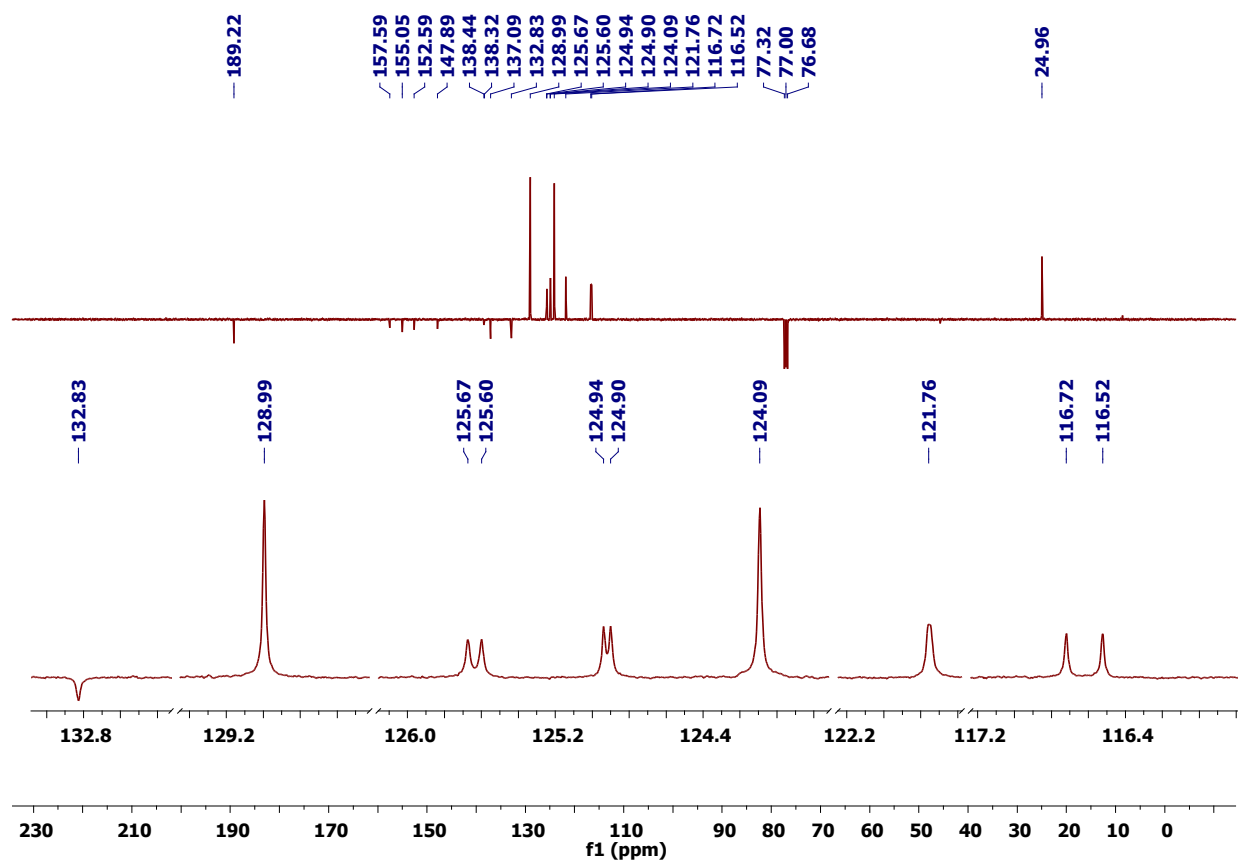

$^1\text{H}$ - $^1\text{H}$  gDQCOSY NMR ( $\text{CDCl}_3$ ) spectrum of (Z)-1-(4-(4-chlorophenyl)-5-((2-fluorophenyl)imino)-4,5-dihydro-1,3,4-thiadiazol-2-yl)ethan-1-one

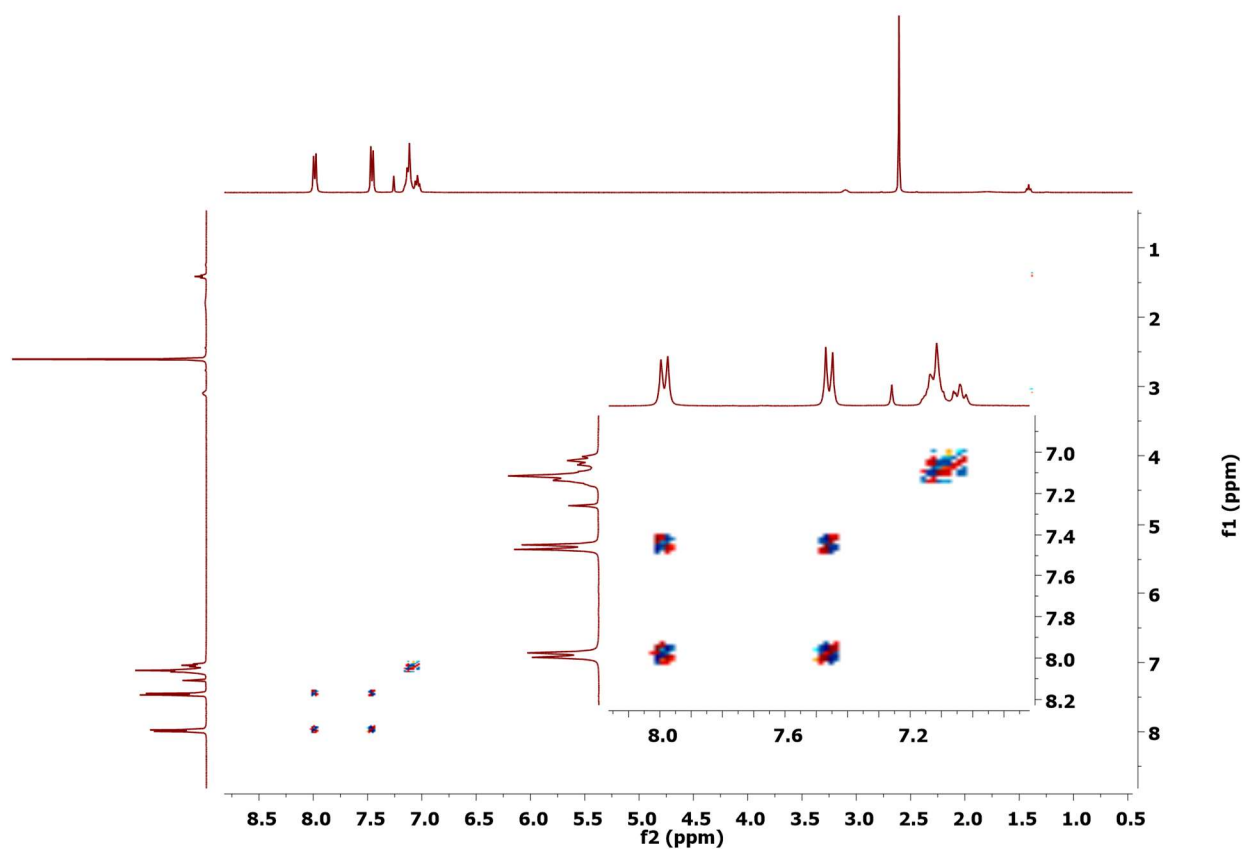

$^1\text{H}$ - $^{13}\text{C}$ -HSQC NMR ( $\text{CDCl}_3$ ) spectrum of (Z)-1-(4-(4-chlorophenyl)-5-((2-fluorophenyl)imino)-4,5-dihydro-1,3,4-thiadiazol-2-yl)ethan-1-one

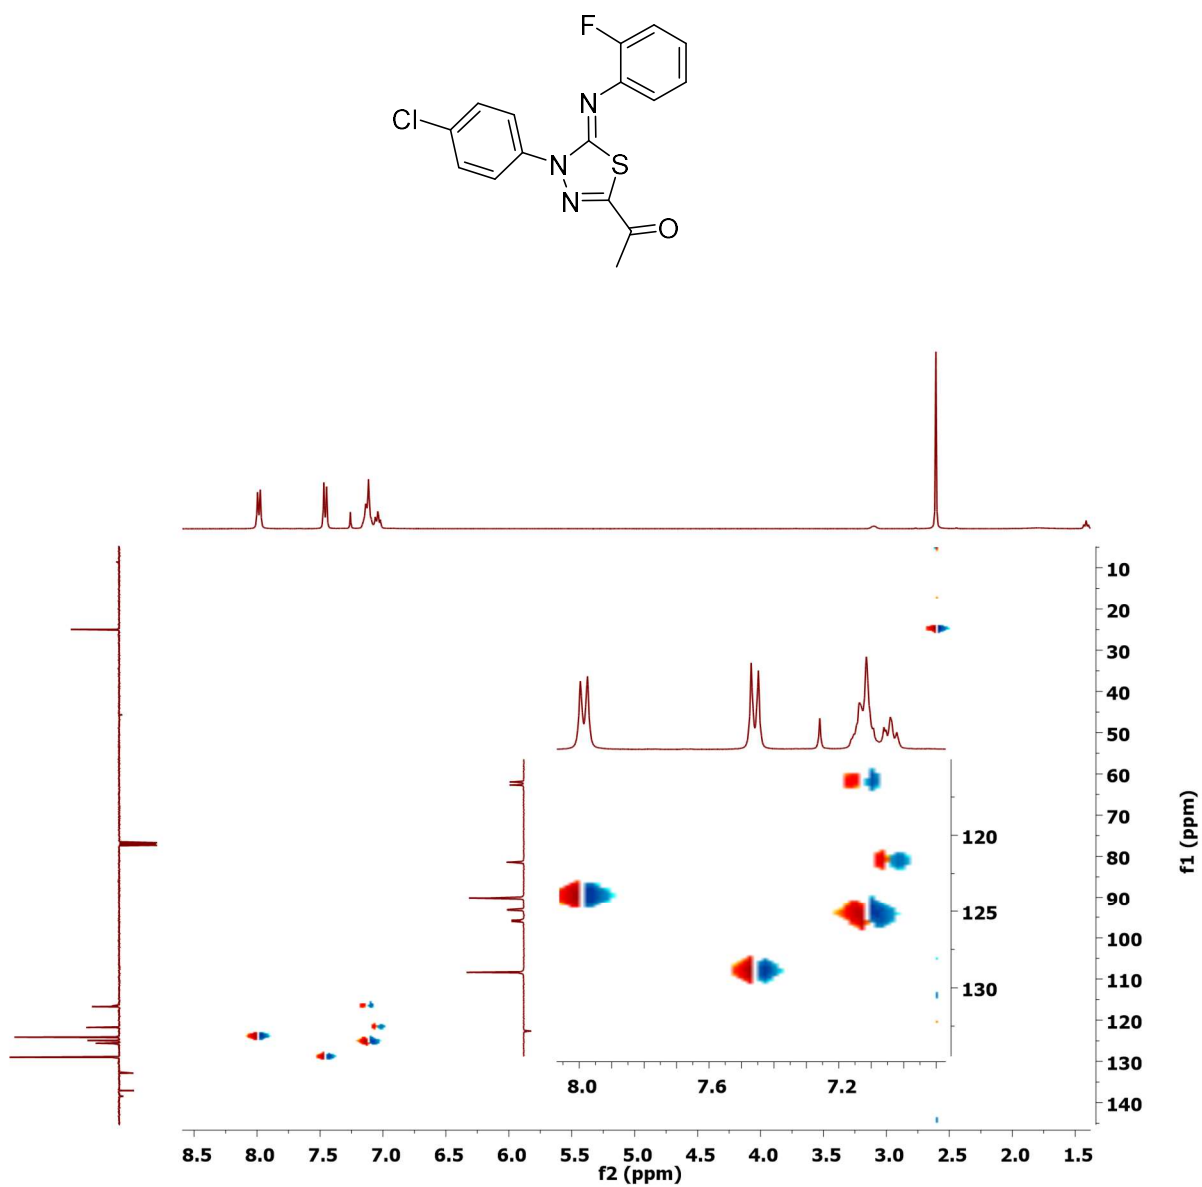



$^1\text{H}$ - $^{13}\text{C}$ -gHMBC NMR ( $\text{CDCl}_3$ ) spectrum of (Z)-1-(4-(4-chlorophenyl)-5-((2-fluorophenyl)imino)-4,5-dihydro-1,3,4-thiadiazol-2-yl)ethan-1-one

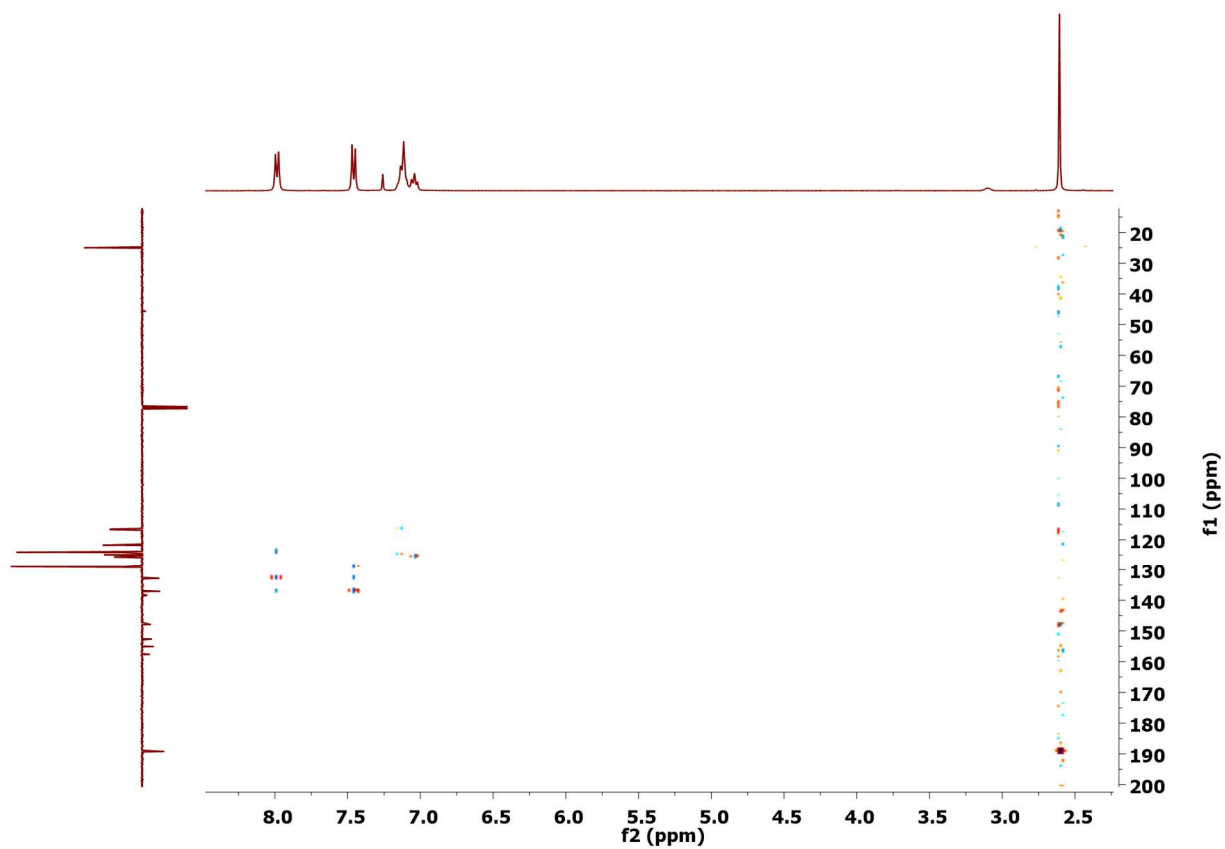

$^1\text{H}$  NMR ( $\text{CDCl}_3$ ) spectrum of (Z)-1-(5-((2-fluorophenyl)imino)-4-(4-iodophenyl)-4,5-dihydro-1,3,4-thiadiazol-2-yl)ethan-1-one

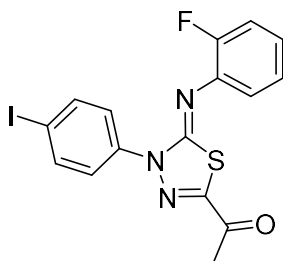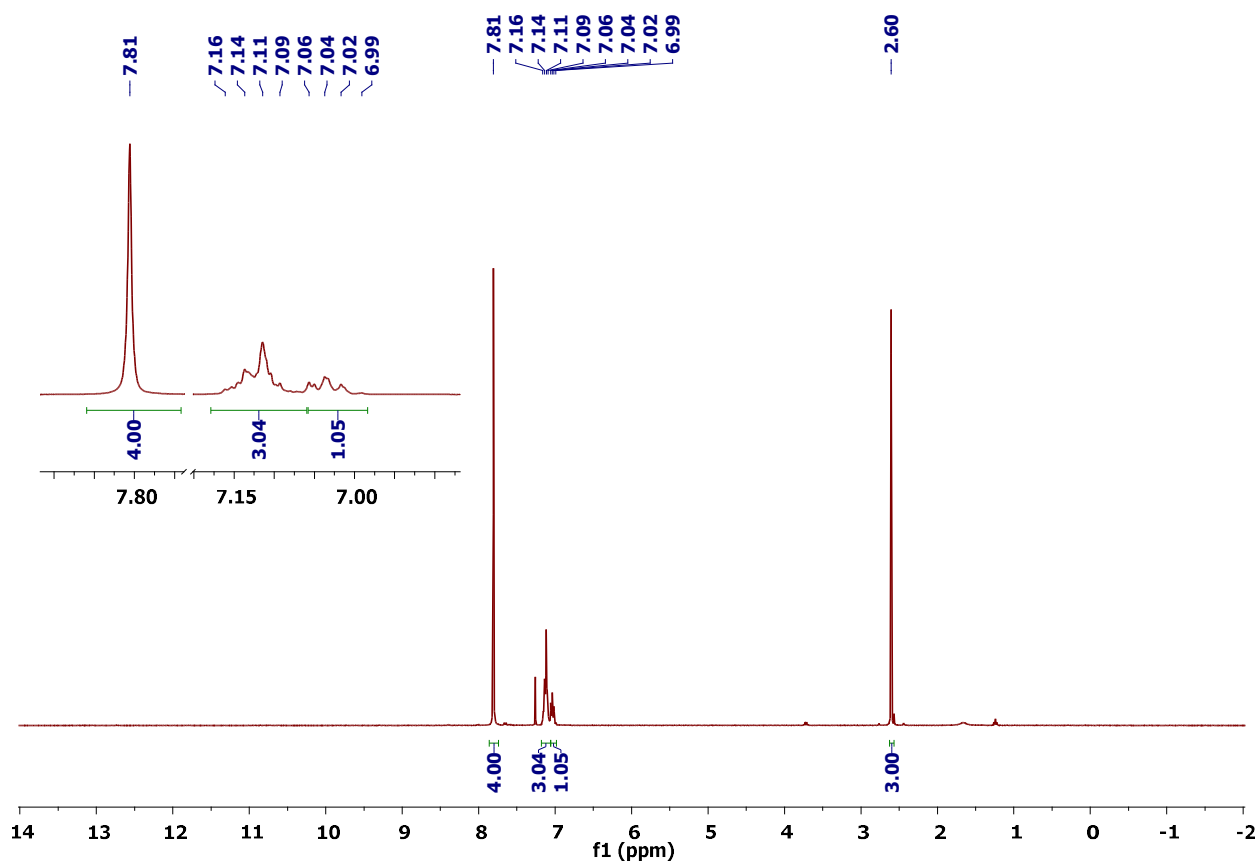

$^{13}\text{C}$  NMR ( $\text{CDCl}_3$ ) spectrum of (Z)-1-(5-((2-fluorophenyl)imino)-4-(4-iodophenyl)-4,5-dihydro-1,3,4-thiadiazol-2-yl)ethan-1-one

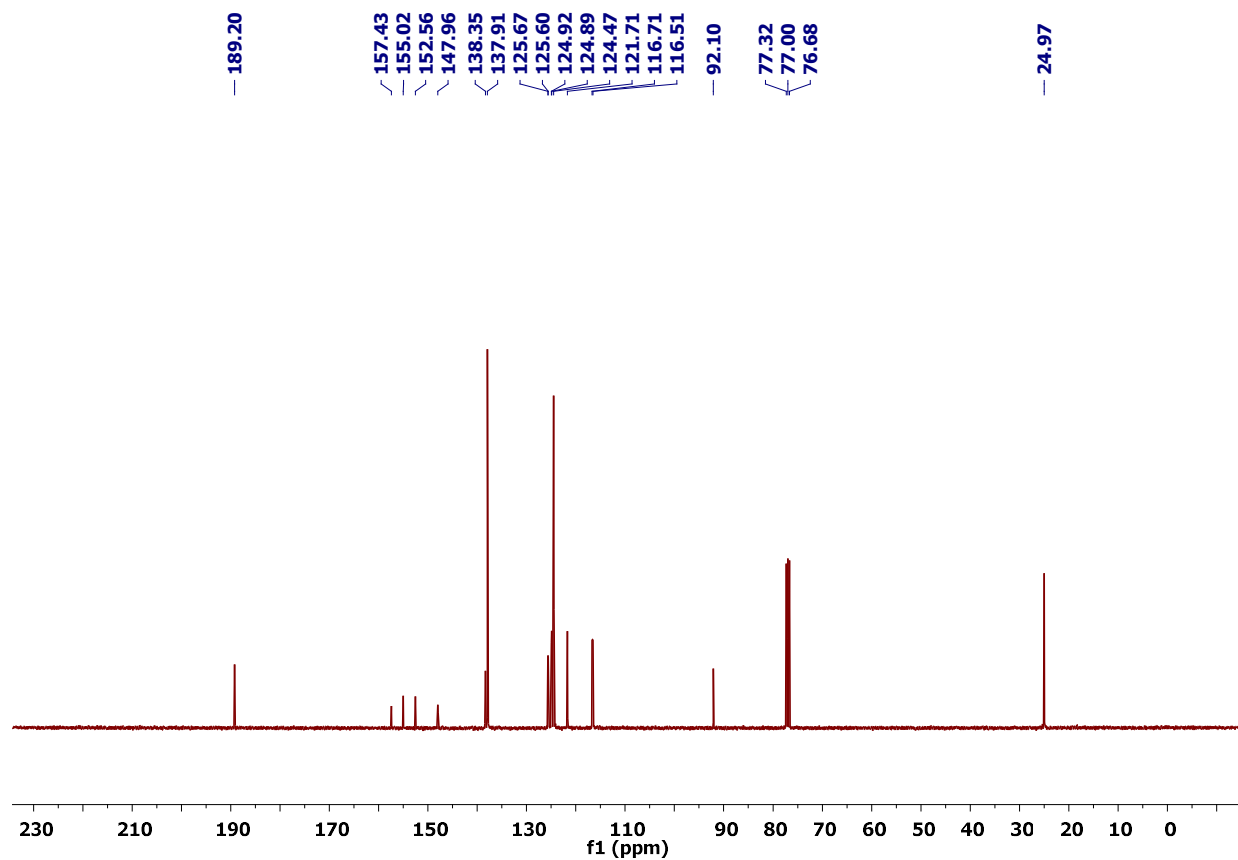

$^{13}\text{C}$  CRAPT NMR ( $\text{CDCl}_3$ ) spectrum of (Z)-1-(5-((2-fluorophenyl)imino)-4-(4-iodophenyl)-4,5-dihydro-1,3,4-thiadiazol-2-yl)ethan-1-one

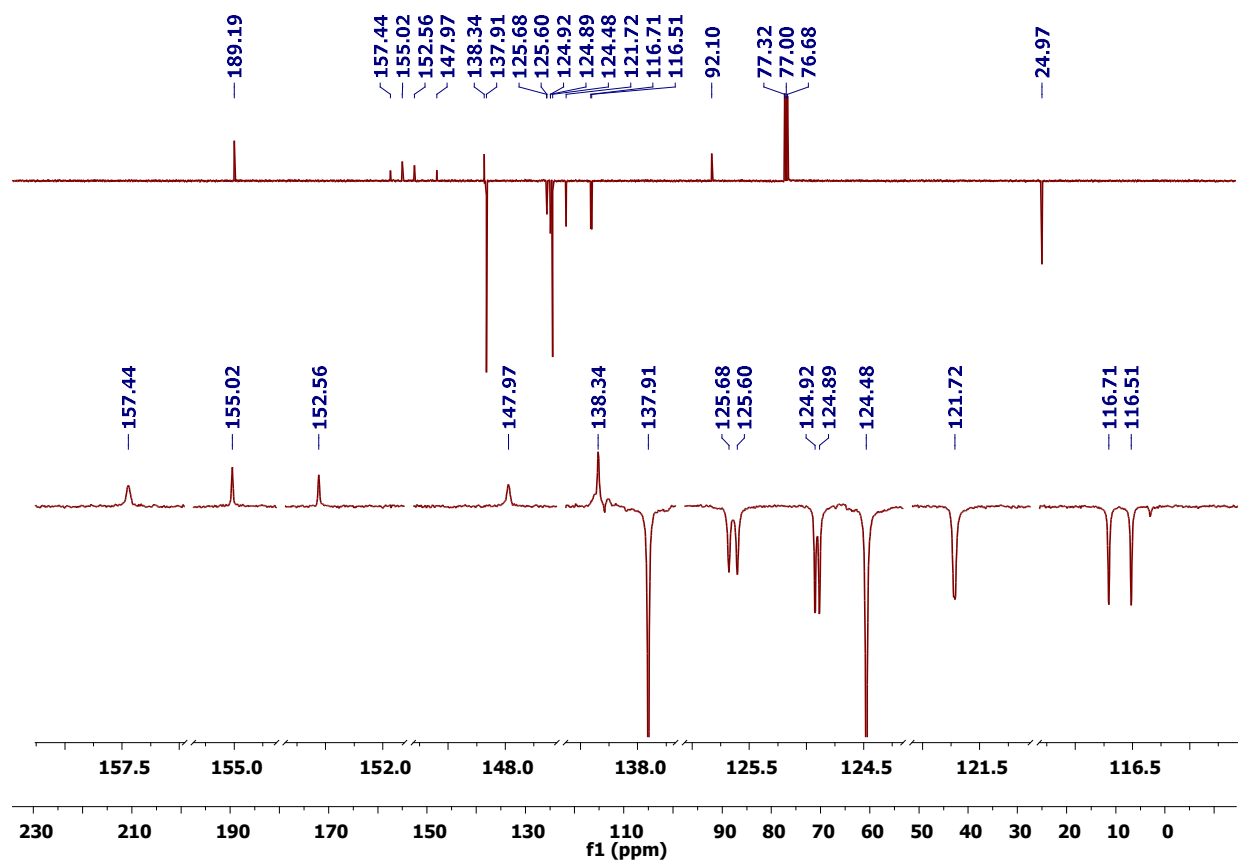

$^1\text{H}$ - $^1\text{H}$  gDQCOSY NMR ( $\text{CDCl}_3$ ) spectrum of (Z)-1-(5-((2-fluorophenyl)imino)-4-(4-iodophenyl)-4,5-dihydro-1,3,4-thiadiazol-2-yl)ethan-1-one

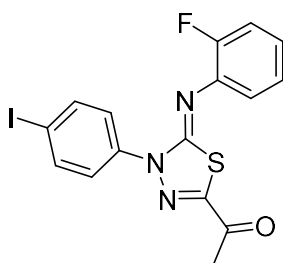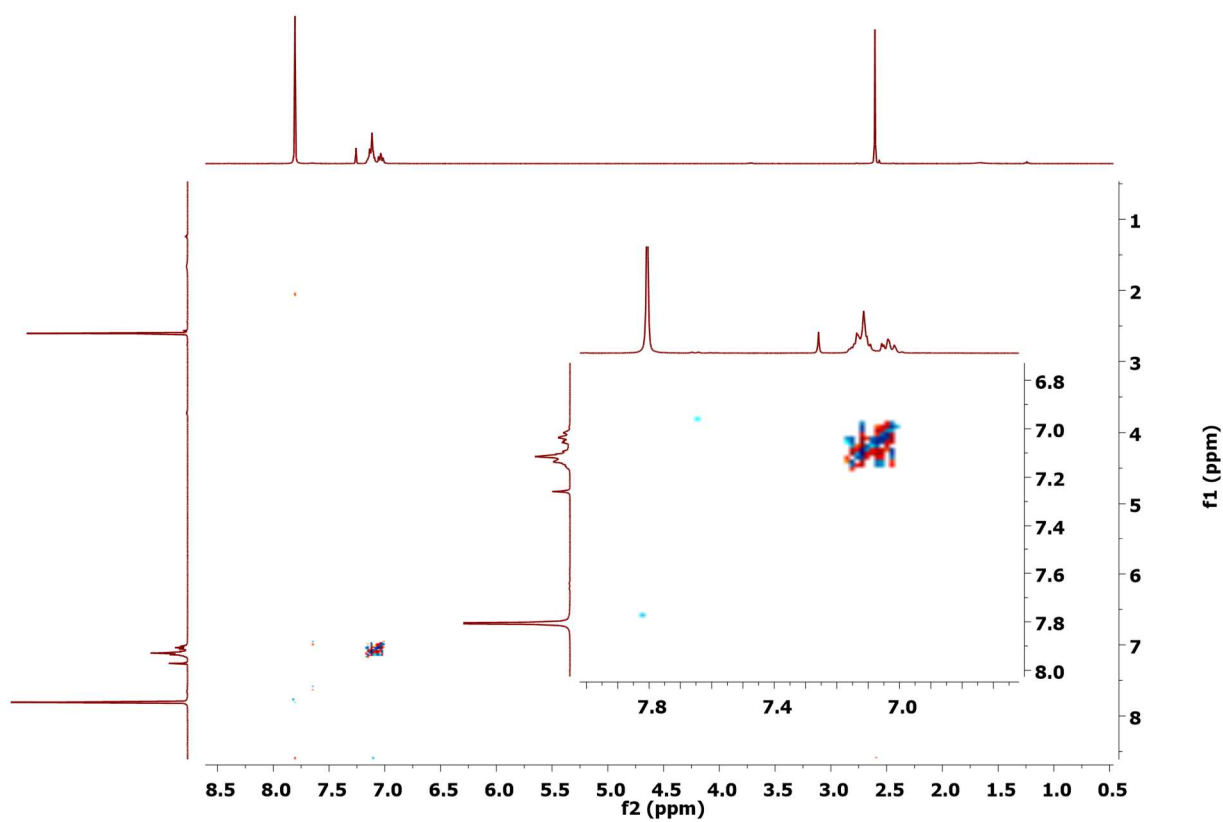

$^1\text{H}$ - $^{13}\text{C}$ -HSQC NMR ( $\text{CDCl}_3$ ) spectrum of (Z)-1-(5-((2-fluorophenyl)imino)-4-(4-iodophenyl)-4,5-dihydro-1,3,4-thiadiazol-2-yl)ethan-1-one

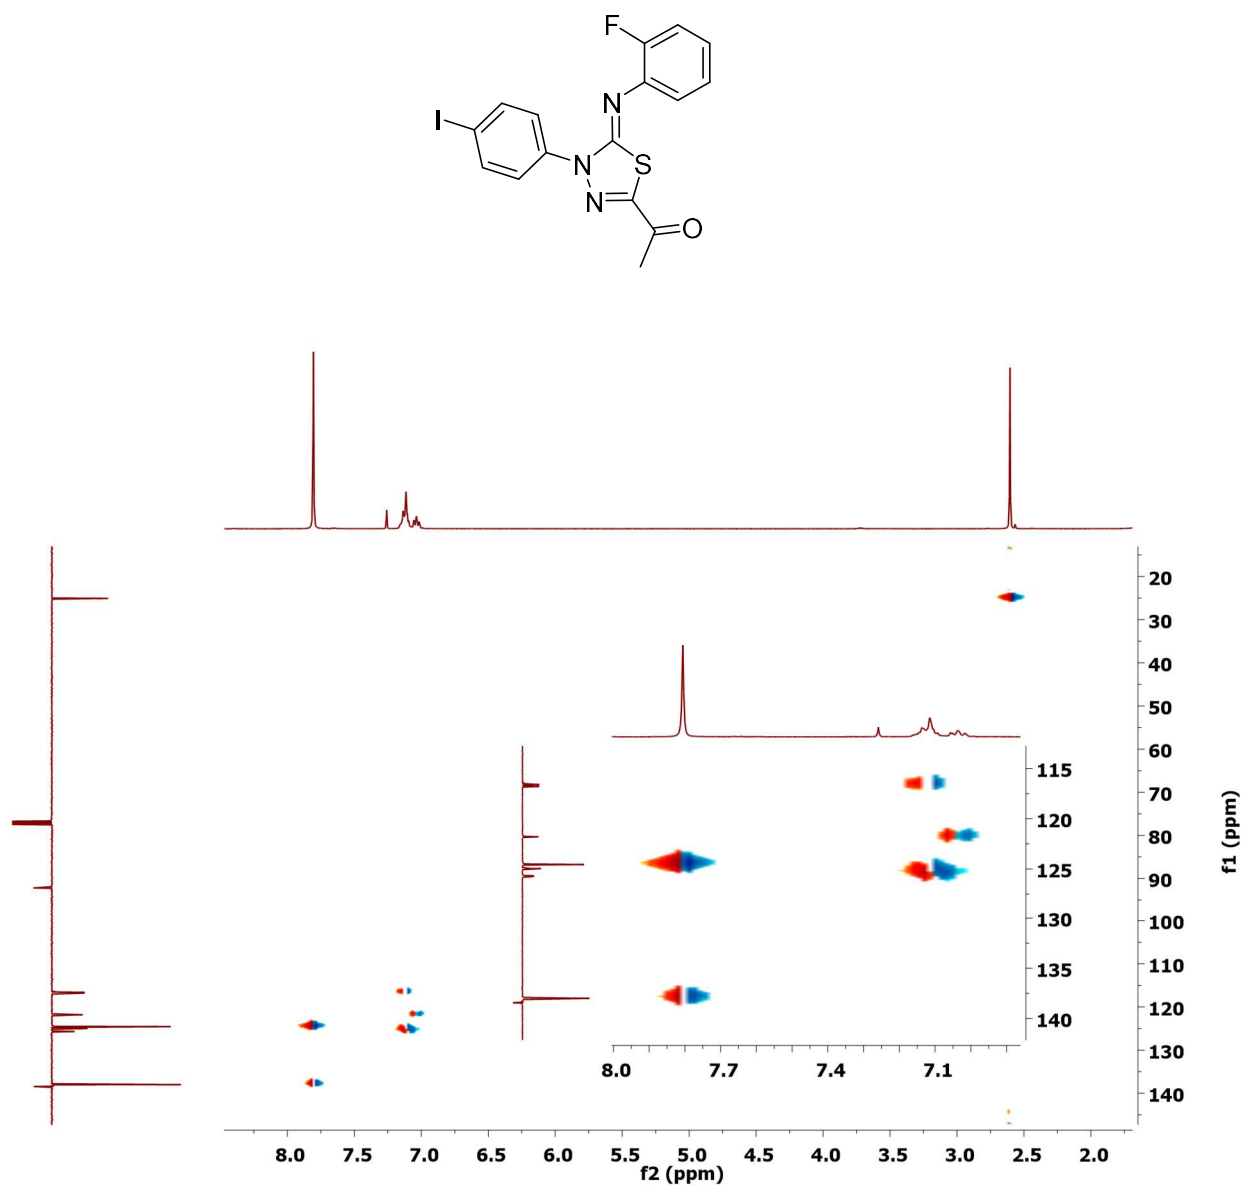

$^1\text{H}$ - $^{13}\text{C}$ -gHMBC NMR ( $\text{CDCl}_3$ ) spectrum of (Z)-1-(5-((2-fluorophenyl)imino)-4-(4-iodophenyl)-4,5-dihydro-1,3,4-thiadiazol-2-yl)ethan-1-one

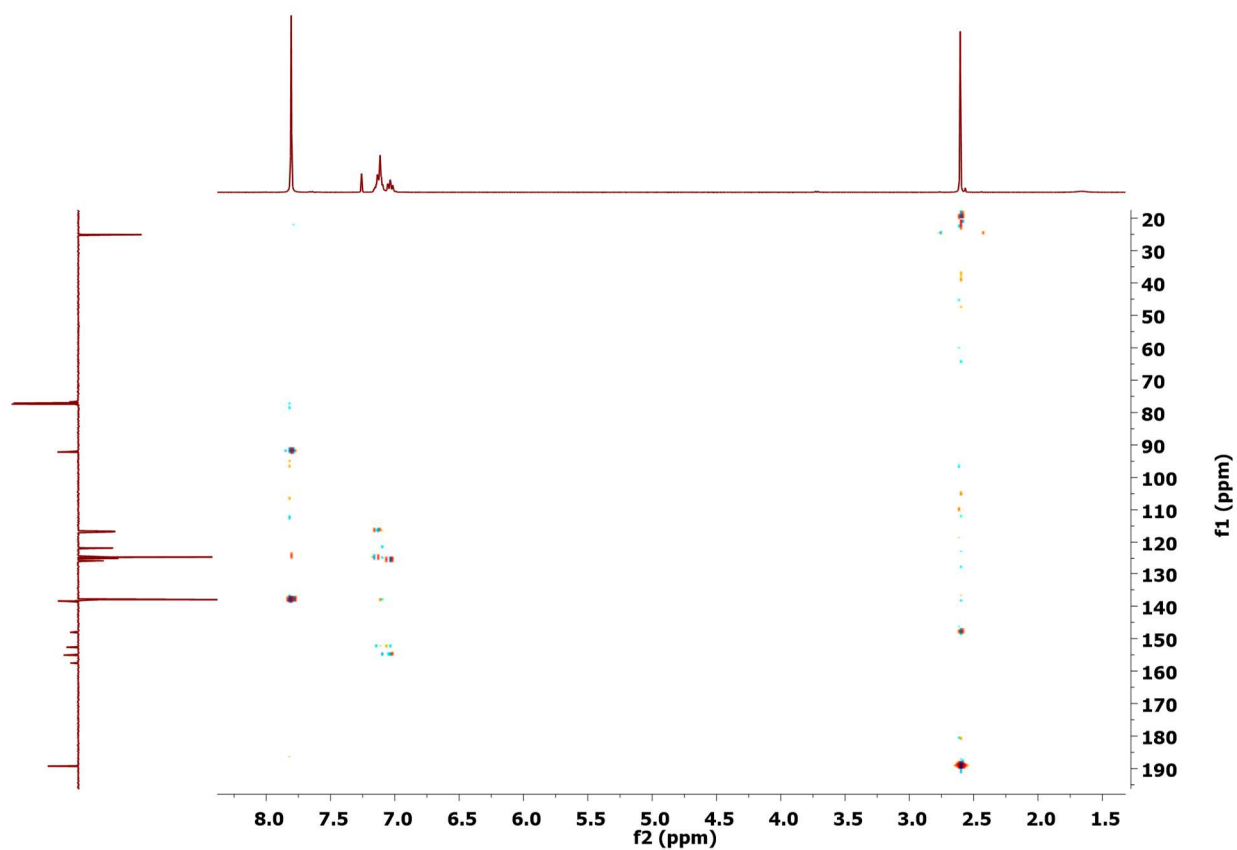

$^1\text{H}$  NMR ( $\text{CDCl}_3$ ) spectrum of (Z)-1-(5-((2-fluorophenyl)imino)-4-(p-tolyl)-4,5-dihydro-1,3,4-thiadiazol-2-yl)ethan-1-one

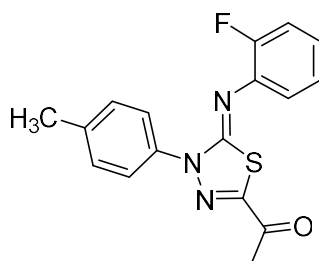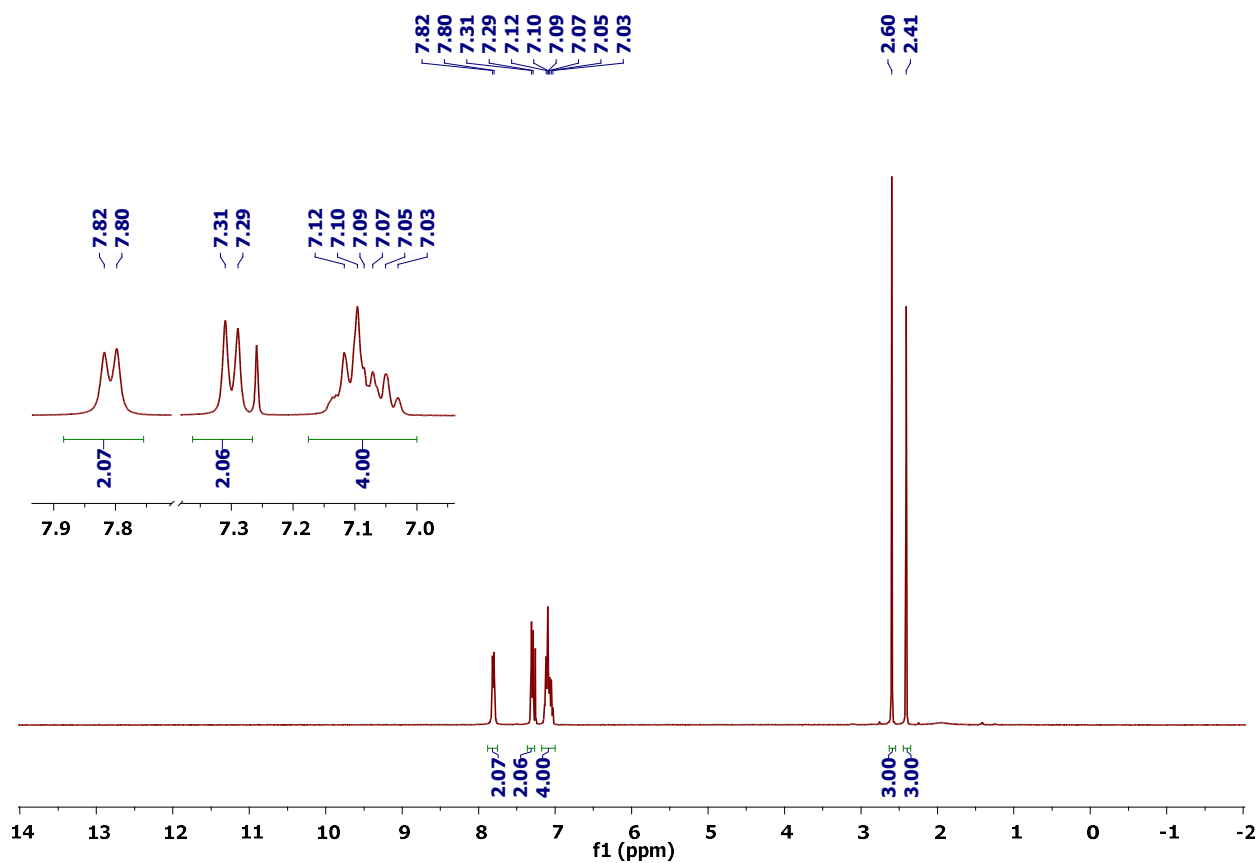



$^{13}\text{C}$  NMR ( $\text{CDCl}_3$ ) spectrum of (Z)-1-(5-((2-fluorophenyl)imino)-4-(p-tolyl)-4,5-dihydro-1,3,4-thiadiazol-2-yl)ethan-1-one

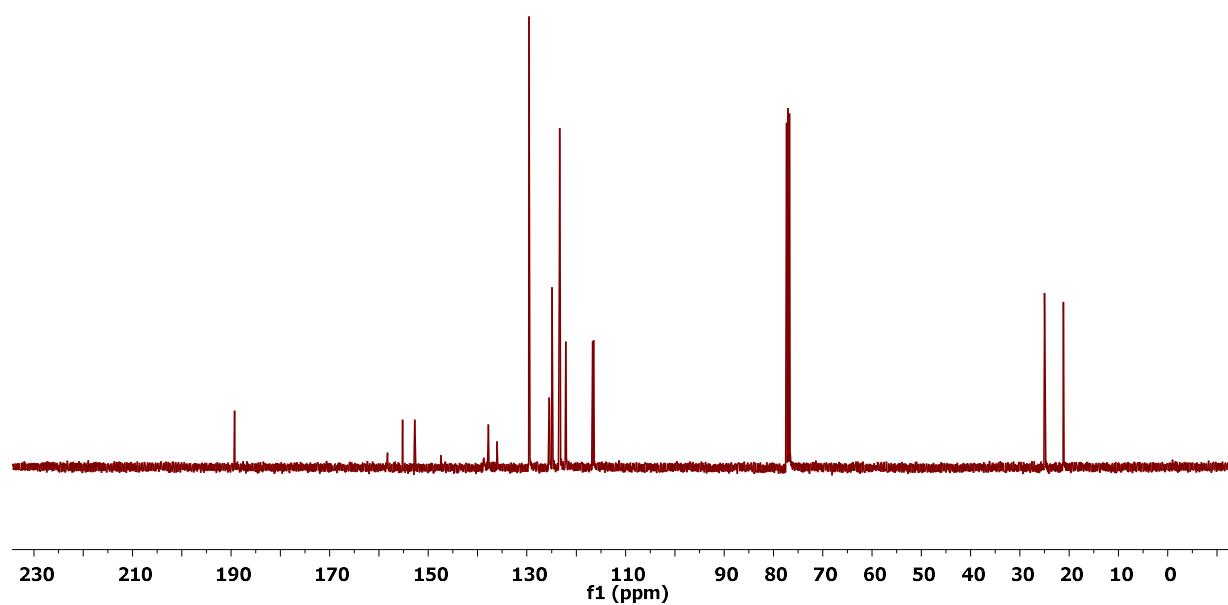

$^{13}\text{C}$  CRAPT NMR ( $\text{CDCl}_3$ ) spectrum of (Z)-1-(5-((2-fluorophenyl)imino)-4-(p-tolyl)-4,5-dihydro-1,3,4-thiadiazol-2-yl)ethan-1-one

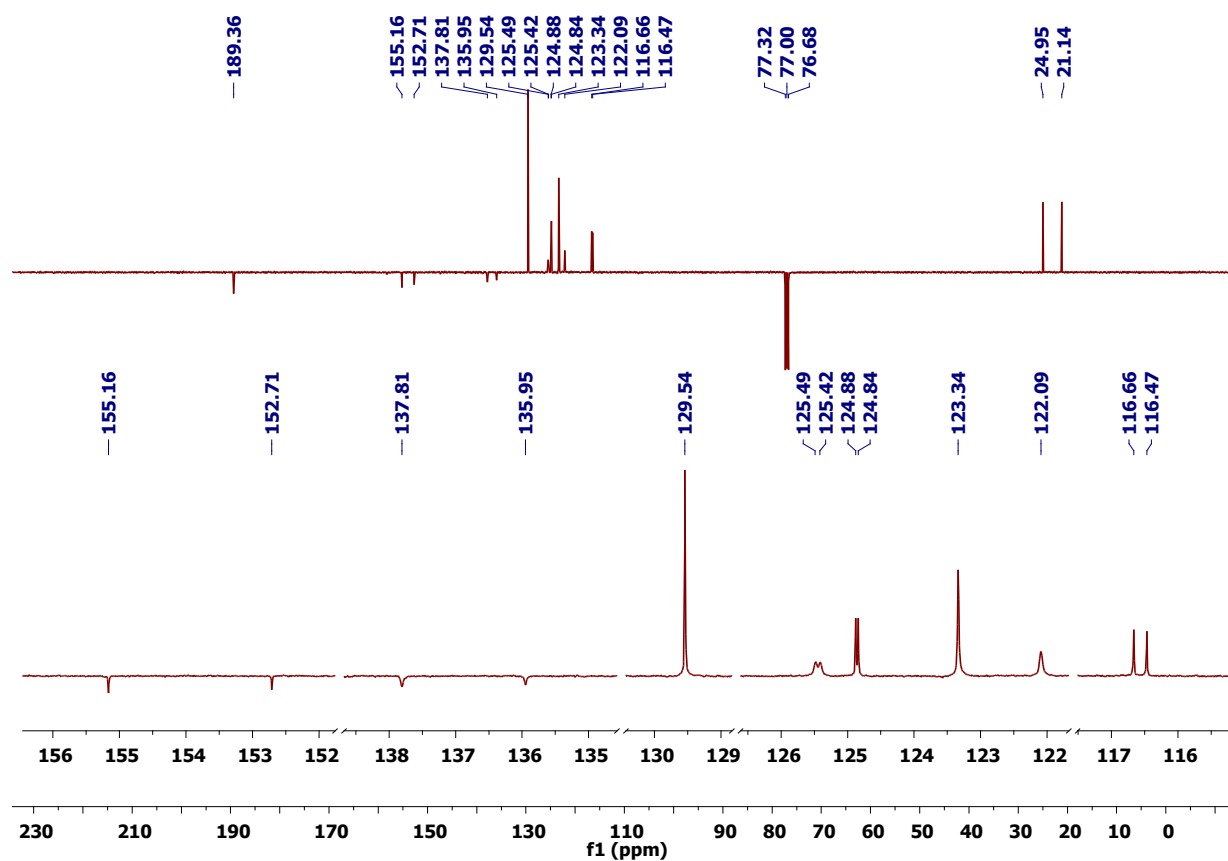

$^1\text{H}$ - $^1\text{H}$  gDQCOSY NMR ( $\text{CDCl}_3$ ) spectrum of (Z)-1-(5-((2-fluorophenyl)imino)-4-(p-tolyl)-4,5-dihydro-1,3,4-thiadiazol-2-yl)ethan-1-one

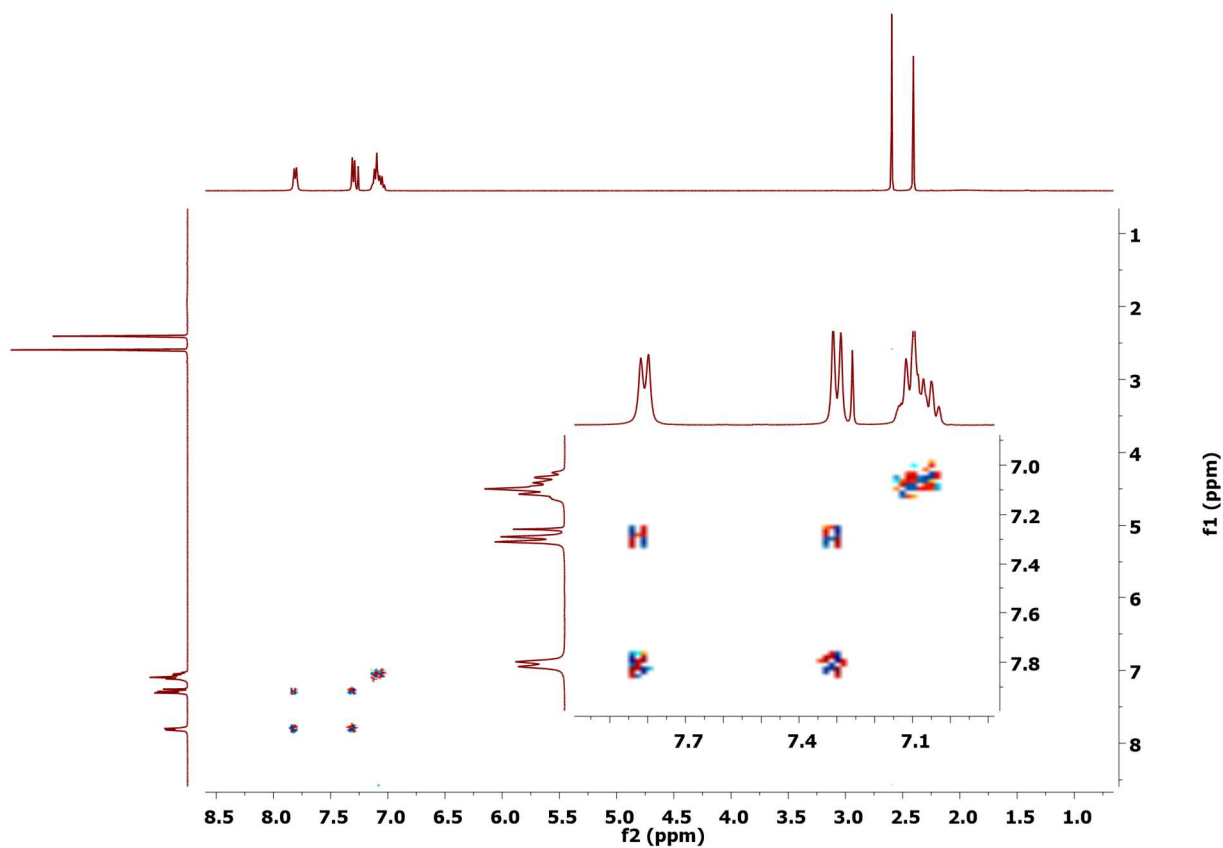

$^1\text{H}$ - $^{13}\text{C}$ -HSQC NMR ( $\text{CDCl}_3$ ) spectrum of (Z)-1-(5-((2-fluorophenyl)imino)-4-(p-tolyl)-4,5-dihydro-1,3,4-thiadiazol-2-yl)ethan-1-one

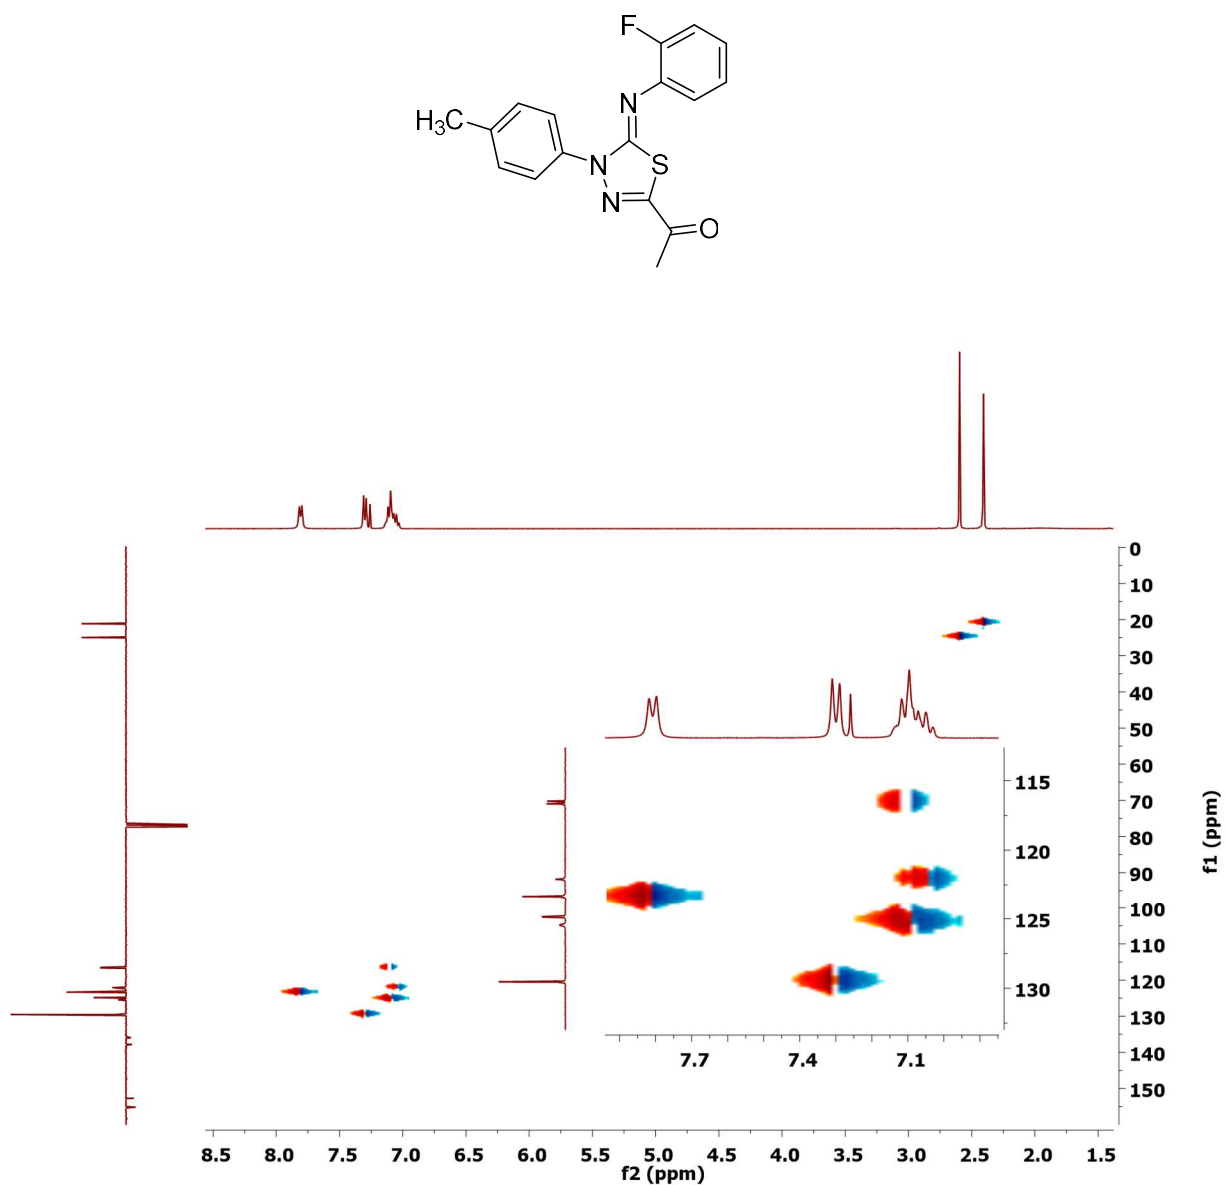

$^1\text{H}$ - $^{13}\text{C}$ -gHMBC NMR ( $\text{CDCl}_3$ ) spectrum of (Z)-1-(5-((2-fluorophenyl)imino)-4-(p-tolyl)-4,5-dihydro-1,3,4-thiadiazol-2-yl)ethan-1-one

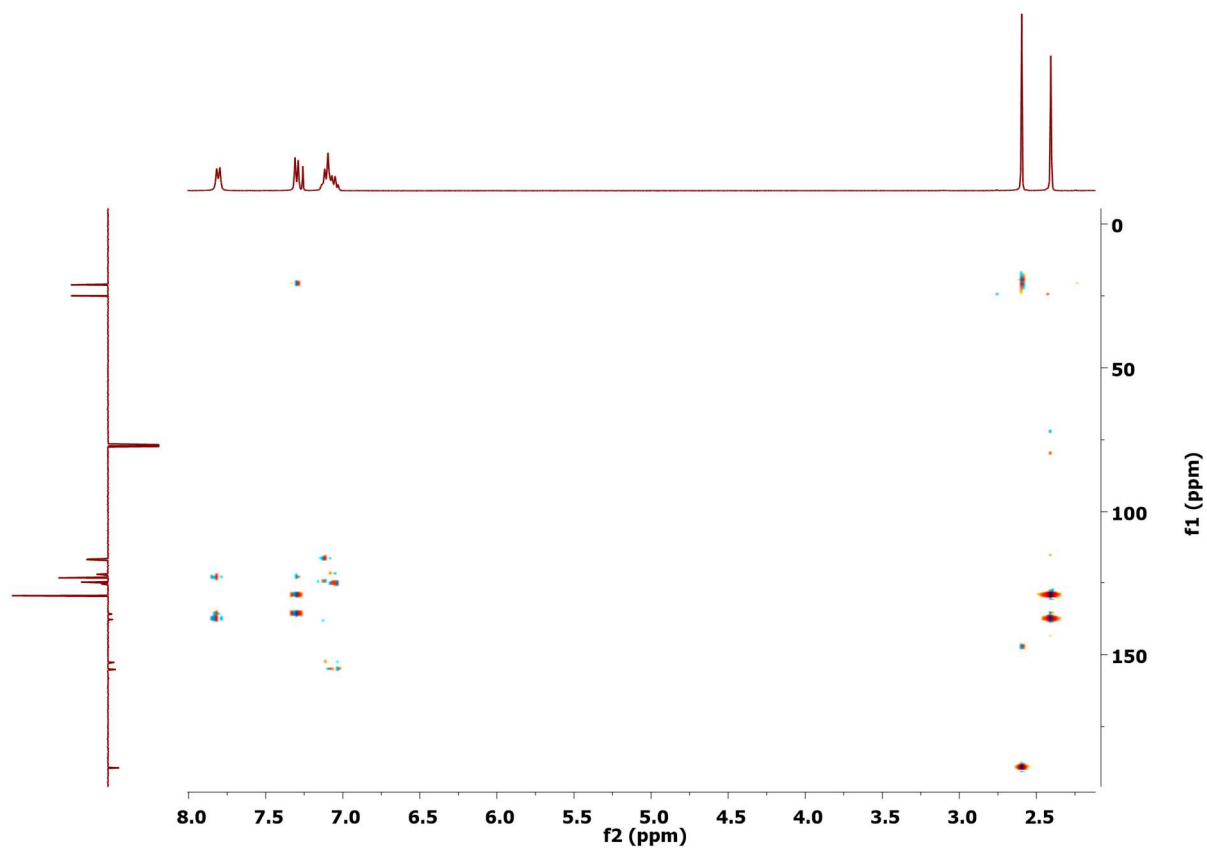

$^1\text{H}$  NMR ( $\text{CDCl}_3$ ) spectrum of (Z)-1-(5-((4-fluorophenyl)imino)-4-(3-(trifluoromethyl)phenyl)-4,5-dihydro-1,3,4-thiadiazol-2-yl)ethan-1-one

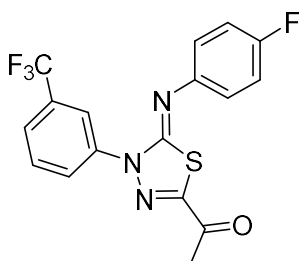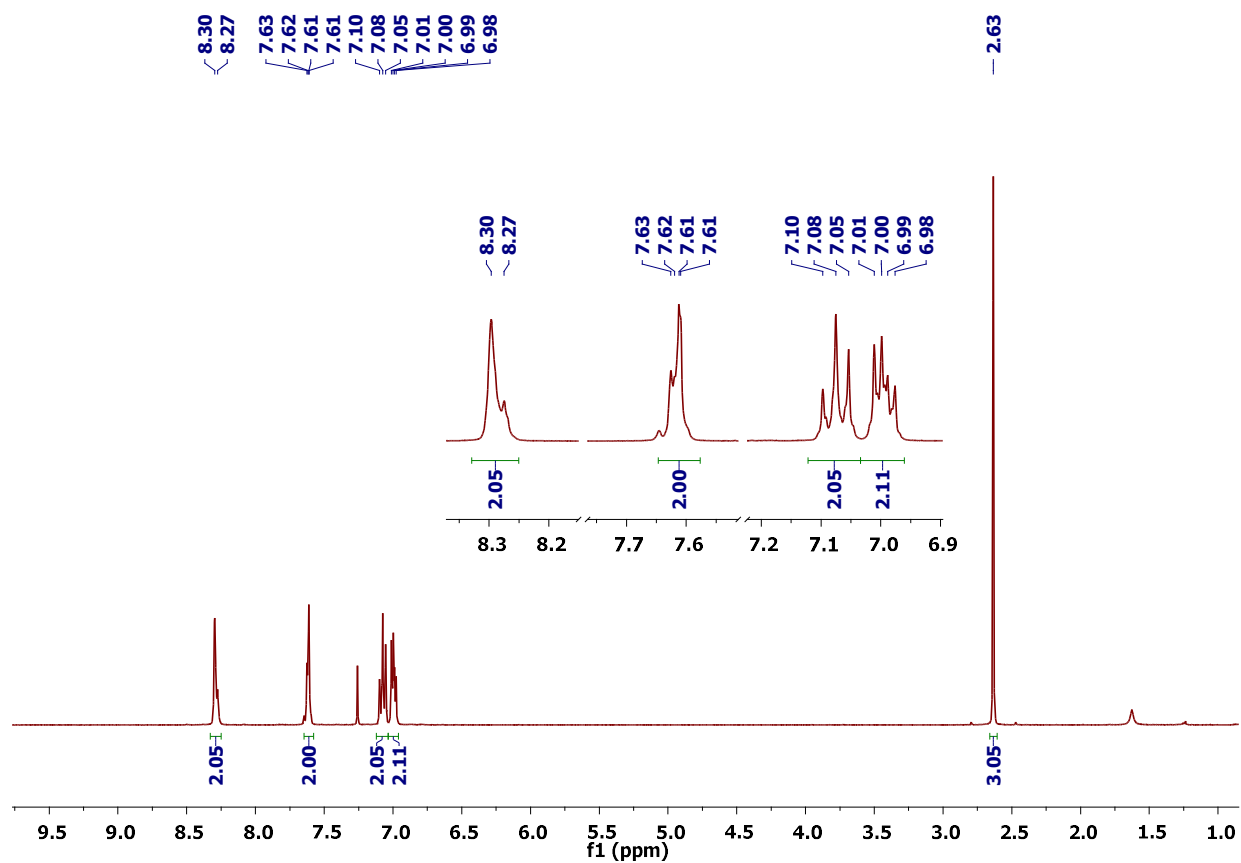

$^{13}\text{C}$  NMR ( $\text{CDCl}_3$ ) spectrum of (Z)-1-(5-((4-fluorophenyl)imino)-4-(3-(trifluoromethyl)phenyl)-4,5-dihydro-1,3,4-thiadiazol-2-yl)ethan-1-one

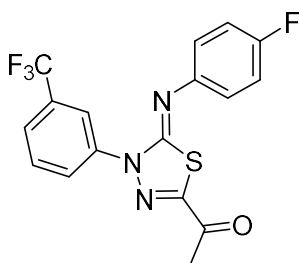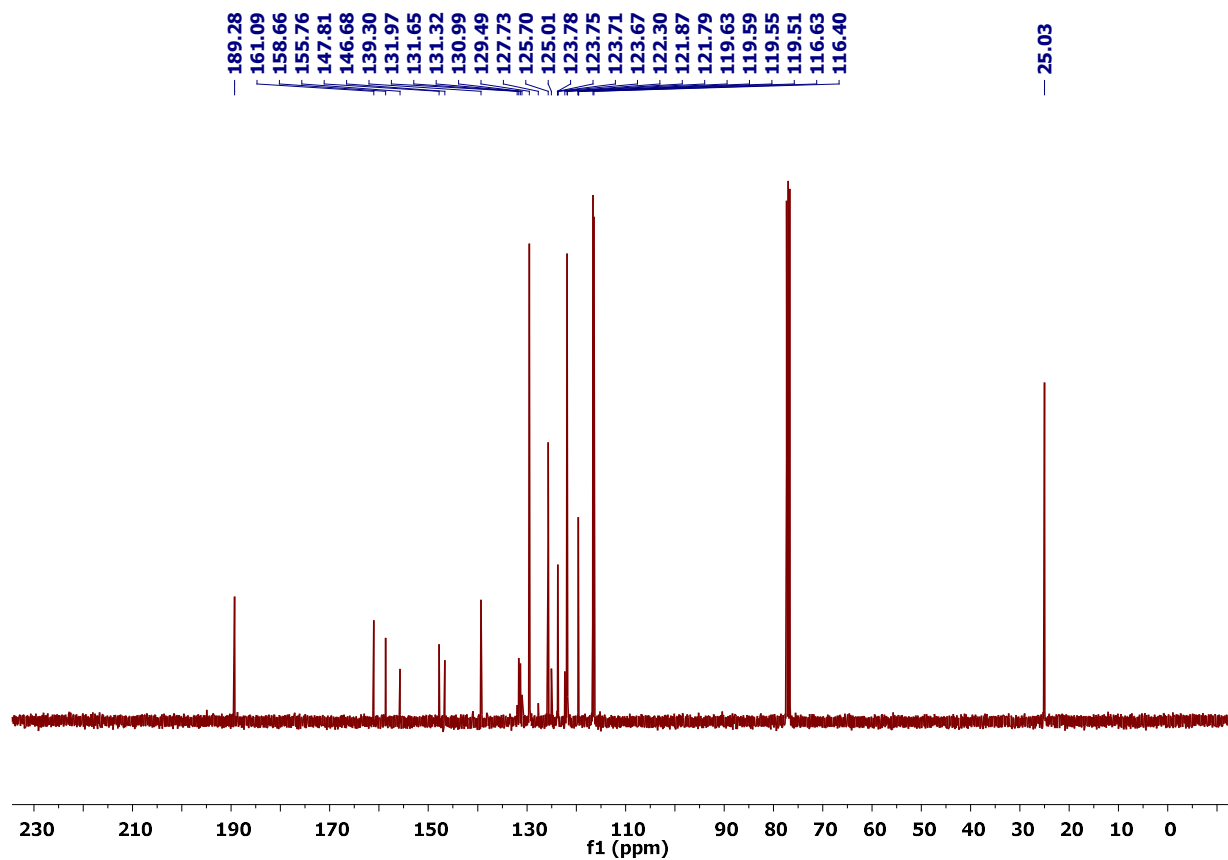

$^{13}\text{C}$  CRAPT NMR ( $\text{CDCl}_3$ ) spectrum of (Z)-1-(5-((4-fluorophenyl)imino)-4-(3-(trifluoromethyl)phenyl)-4,5-dihydro-1,3,4-thiadiazol-2-yl)ethan-1-one

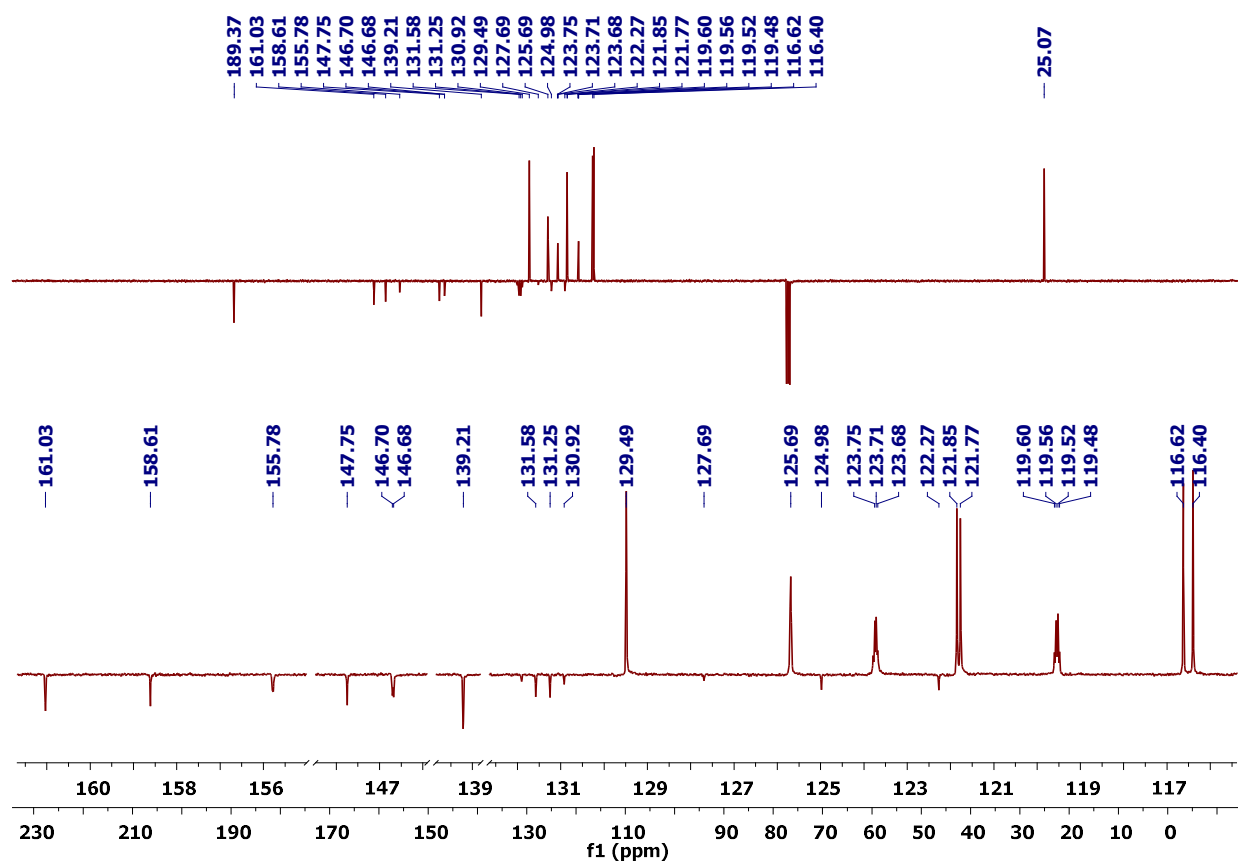



$^1\text{H}$ - $^1\text{H}$  gDQCOSY NMR ( $\text{CDCl}_3$ ) spectrum of (Z)-1-(5-((4-fluorophenyl)imino)-4-(3-(trifluoromethyl)phenyl)-4,5-dihydro-1,3,4-thiadiazol-2-yl)ethan-1-one

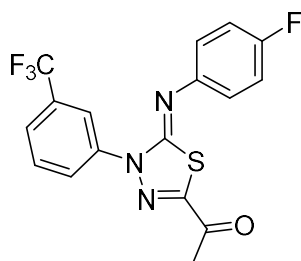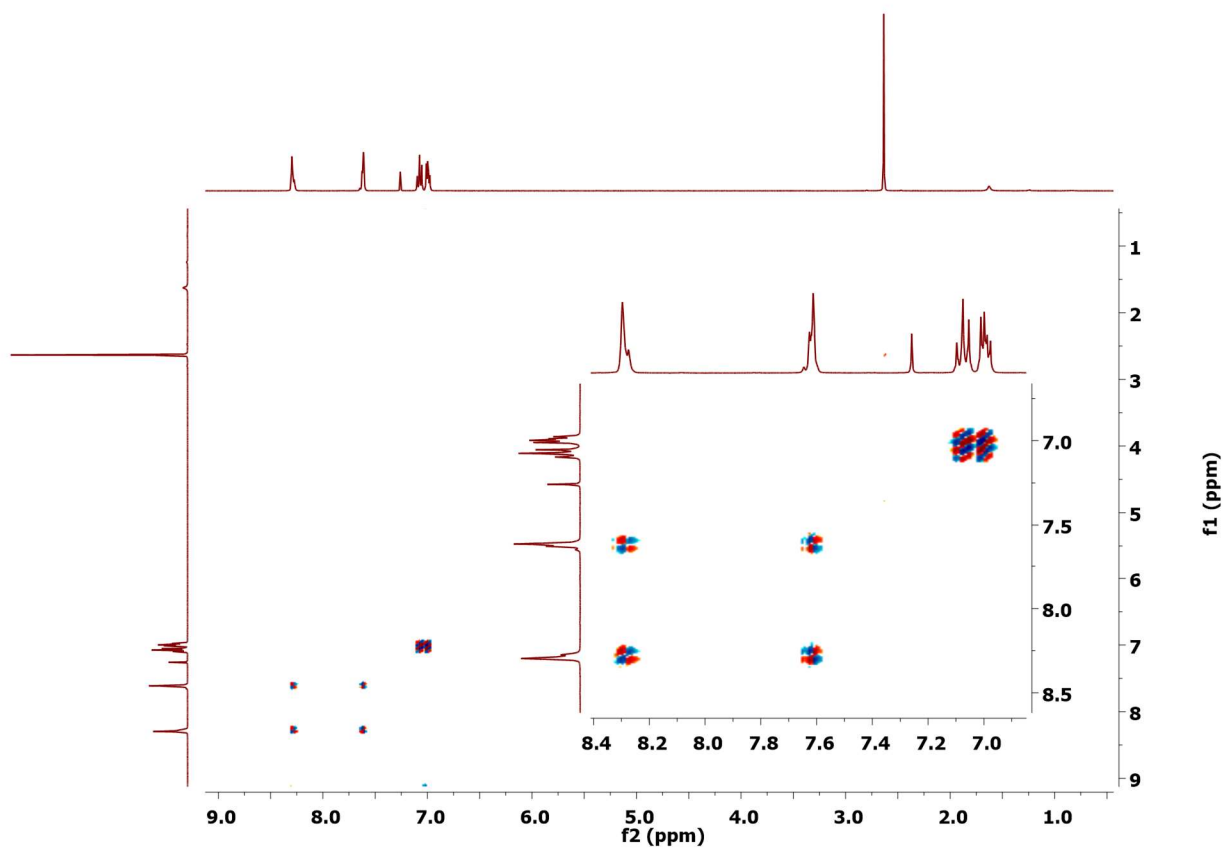

$^1\text{H}$ - $^{13}\text{C}$ -HSQC NMR ( $\text{CDCl}_3$ ) spectrum of (Z)-1-(5-((4-fluorophenyl)imino)-4-(3-(trifluoromethyl)phenyl)-4,5-dihydro-1,3,4-thiadiazol-2-yl)ethan-1-one

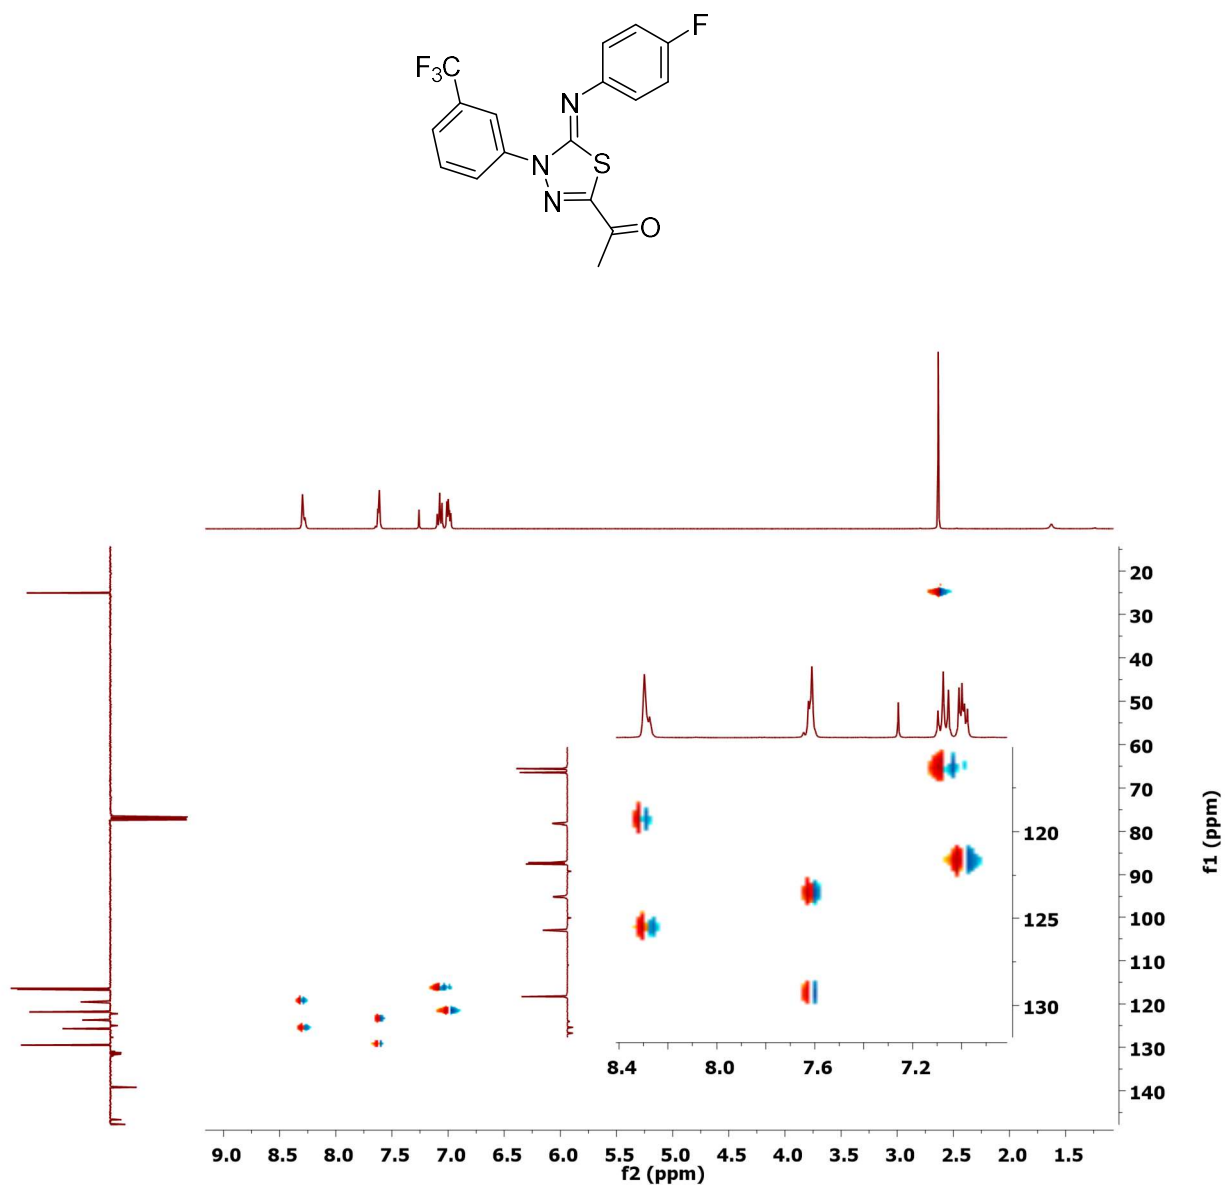

$^1\text{H}$ - $^{13}\text{C}$ -gHMBC NMR ( $\text{CDCl}_3$ ) spectrum of (Z)-1-(5-((4-fluorophenyl)imino)-4-(3-(trifluoromethyl)phenyl)-4,5-dihydro-1,3,4-thiadiazol-2-yl)ethan-1-one

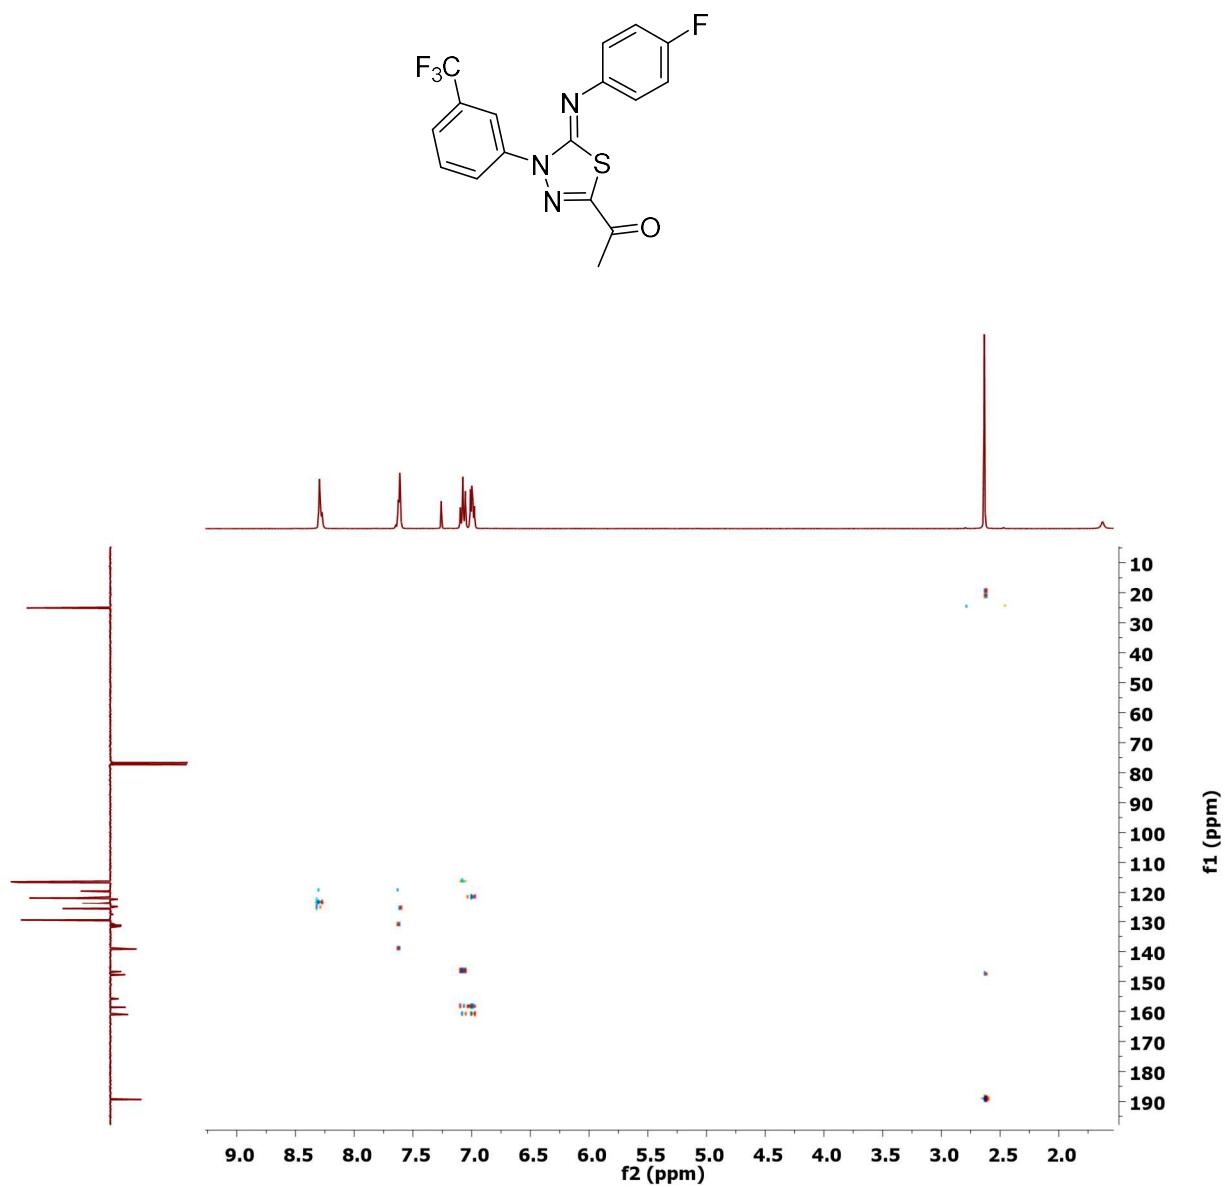

$^1\text{H}$  NMR ( $\text{CDCl}_3$ ) spectrum of (Z)-3-((5-acetyl-3-(4-bromophenyl)-1,3,4-thiadiazol-2(3H)-ylidene)amino)benzonitrile

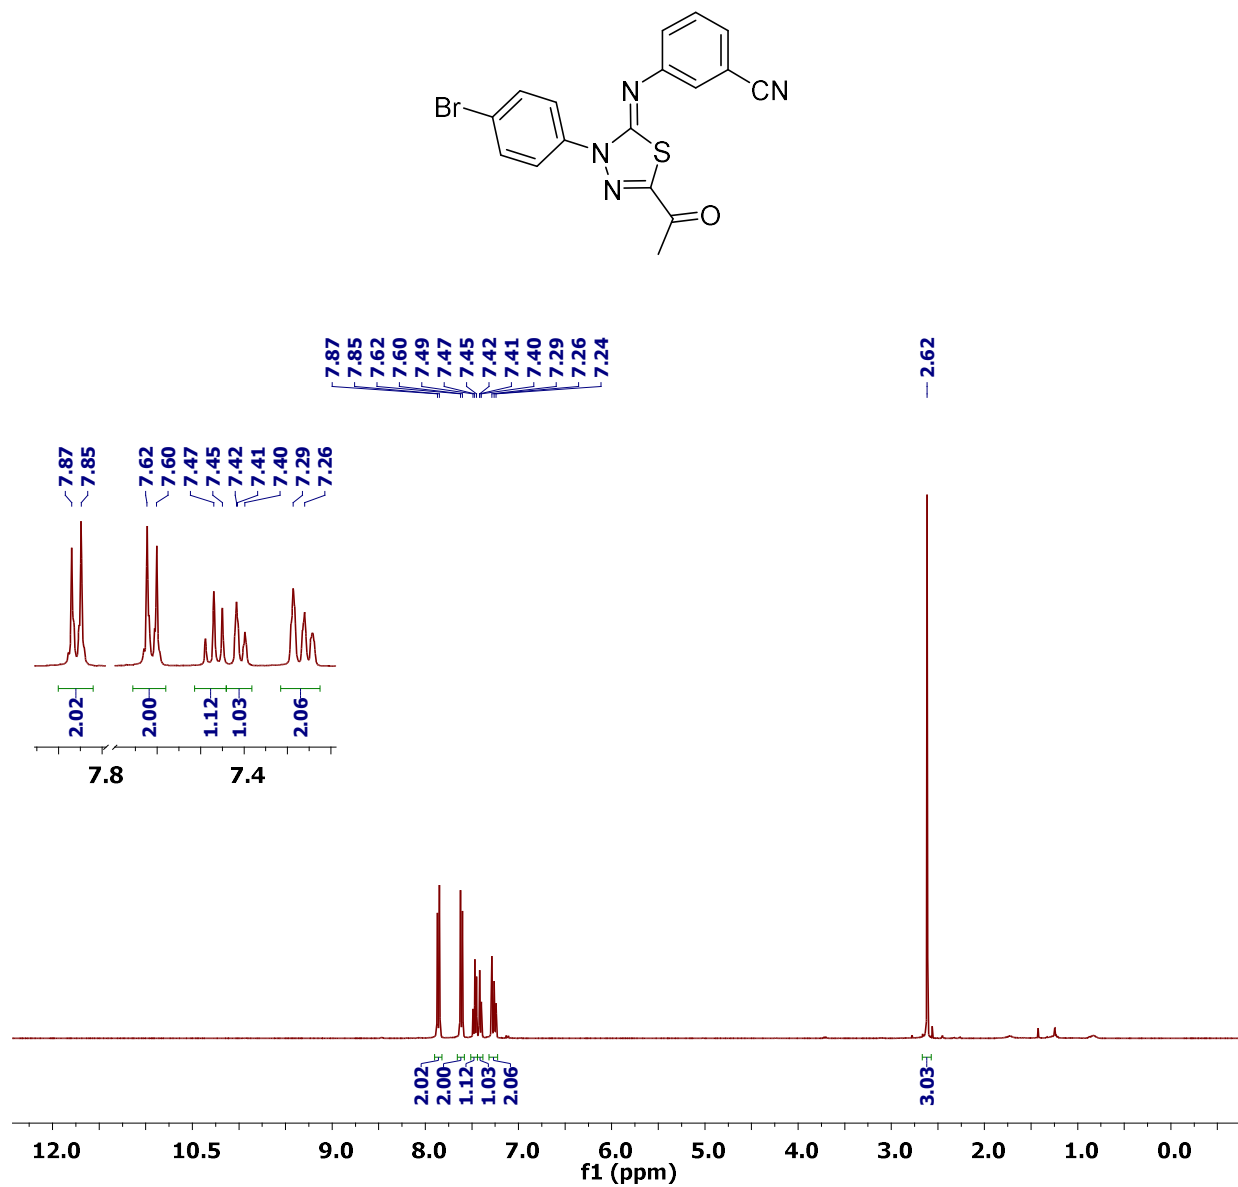

$^{13}\text{C}$  NMR ( $\text{CDCl}_3$ ) spectrum of (Z)-3-((5-acetyl-3-(4-bromophenyl)-1,3,4-thiadiazol-2(3H)-ylidene)amino)benzonitrile

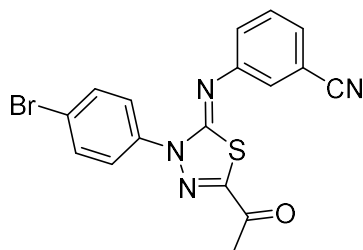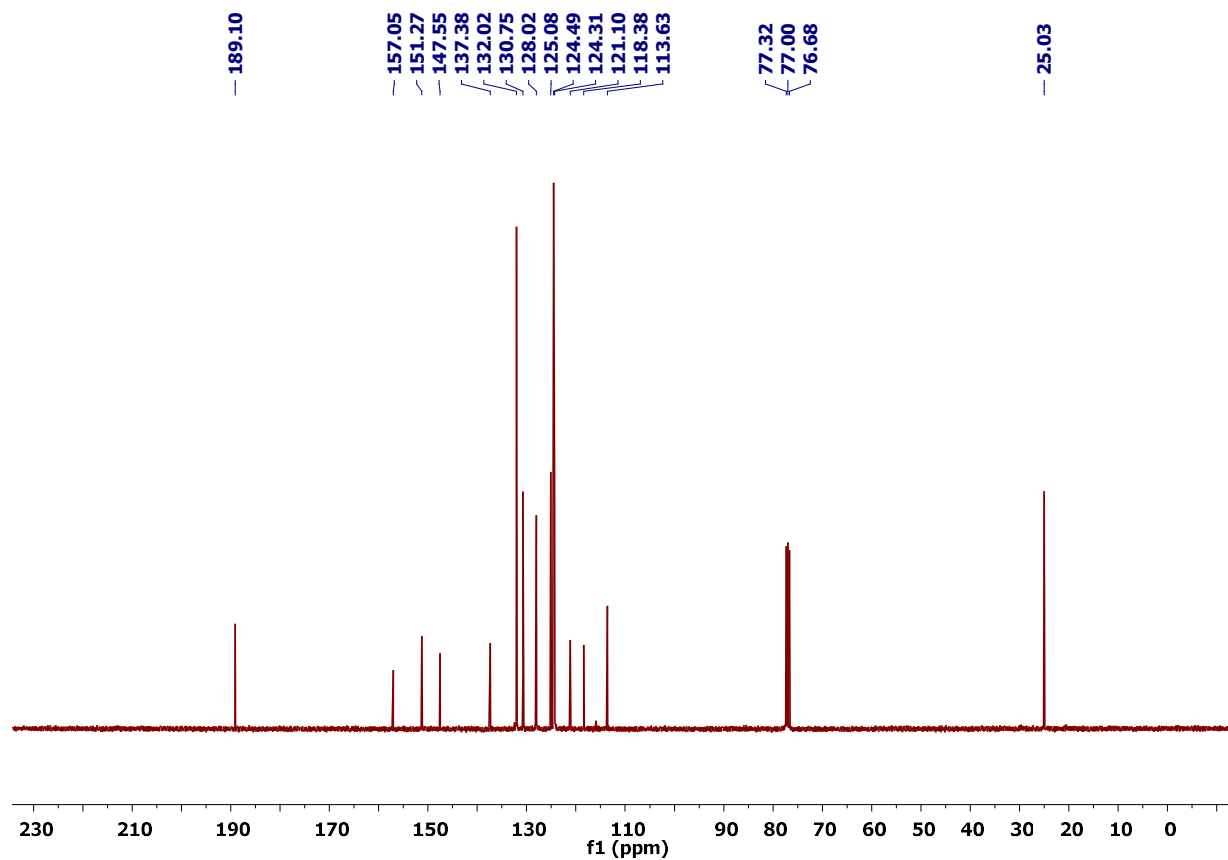

$^{13}\text{C}$  CRAPT NMR ( $\text{CDCl}_3$ ) spectrum of (Z)-3-((5-acetyl-3-(4-bromophenyl)-1,3,4-thiadiazol-2(3H)-ylidene)amino)benzonitrile

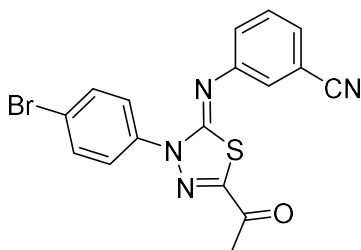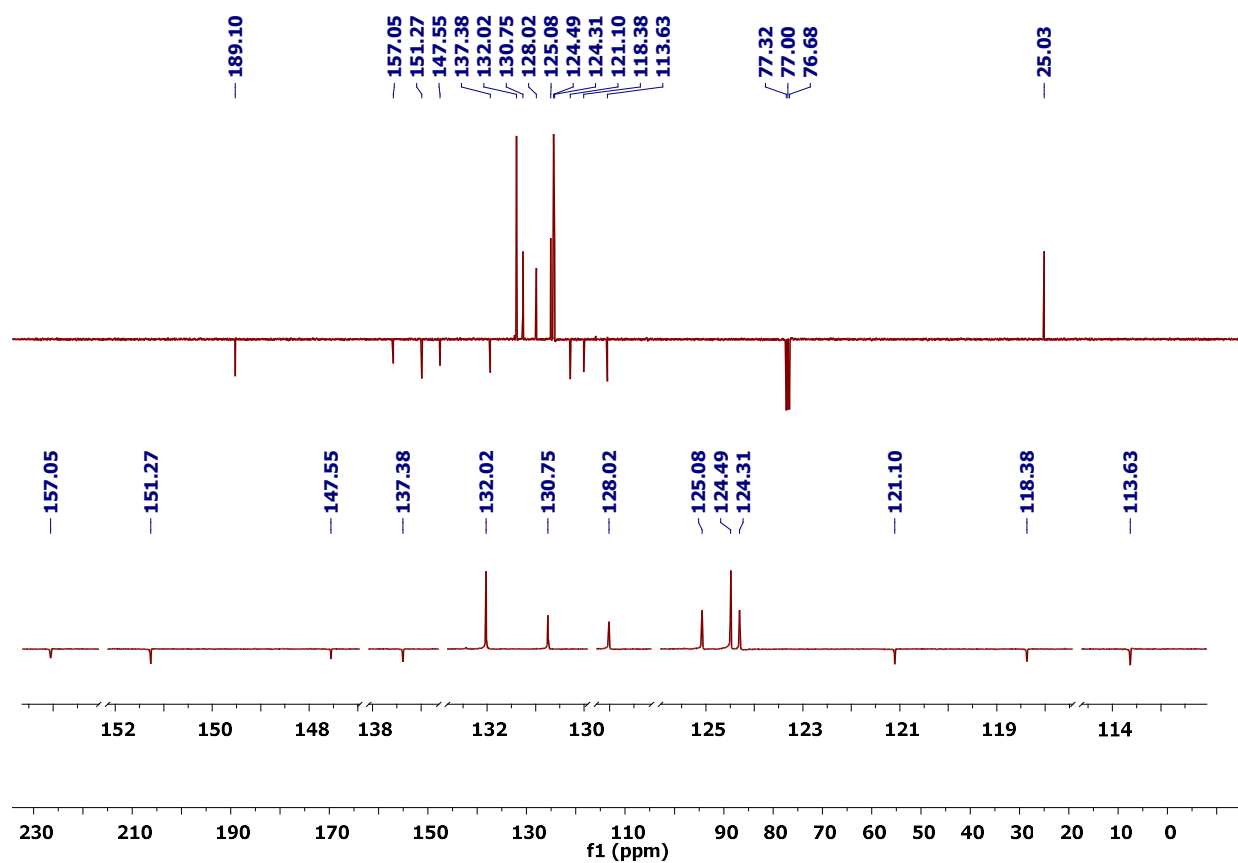

$^1\text{H}$ - $^1\text{H}$  gDQCOSY NMR ( $\text{CDCl}_3$ ) spectrum of (Z)-3-((5-acetyl-3-(4-bromophenyl)-1,3,4-thiadiazol-2(3H)-ylidene)amino)benzonitrile

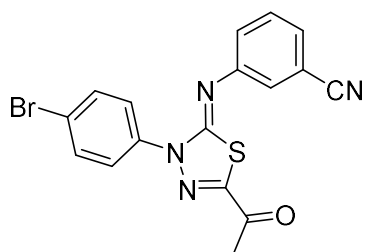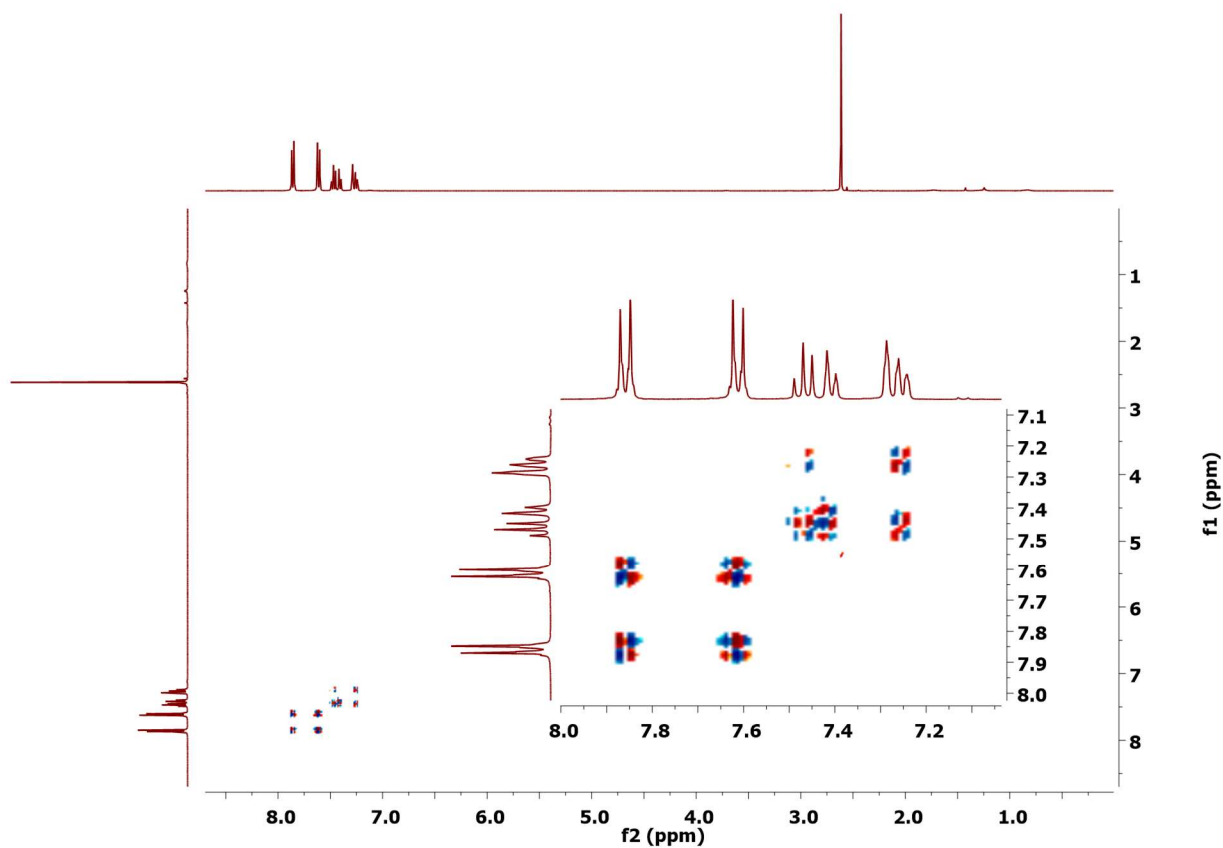

$^1\text{H}$ - $^{13}\text{C}$ -HSQC NMR ( $\text{CDCl}_3$ ) spectrum of (Z)-3-((5-acetyl-3-(4-bromophenyl)-1,3,4-thiadiazol-2(3H)-ylidene)amino)benzonitrile

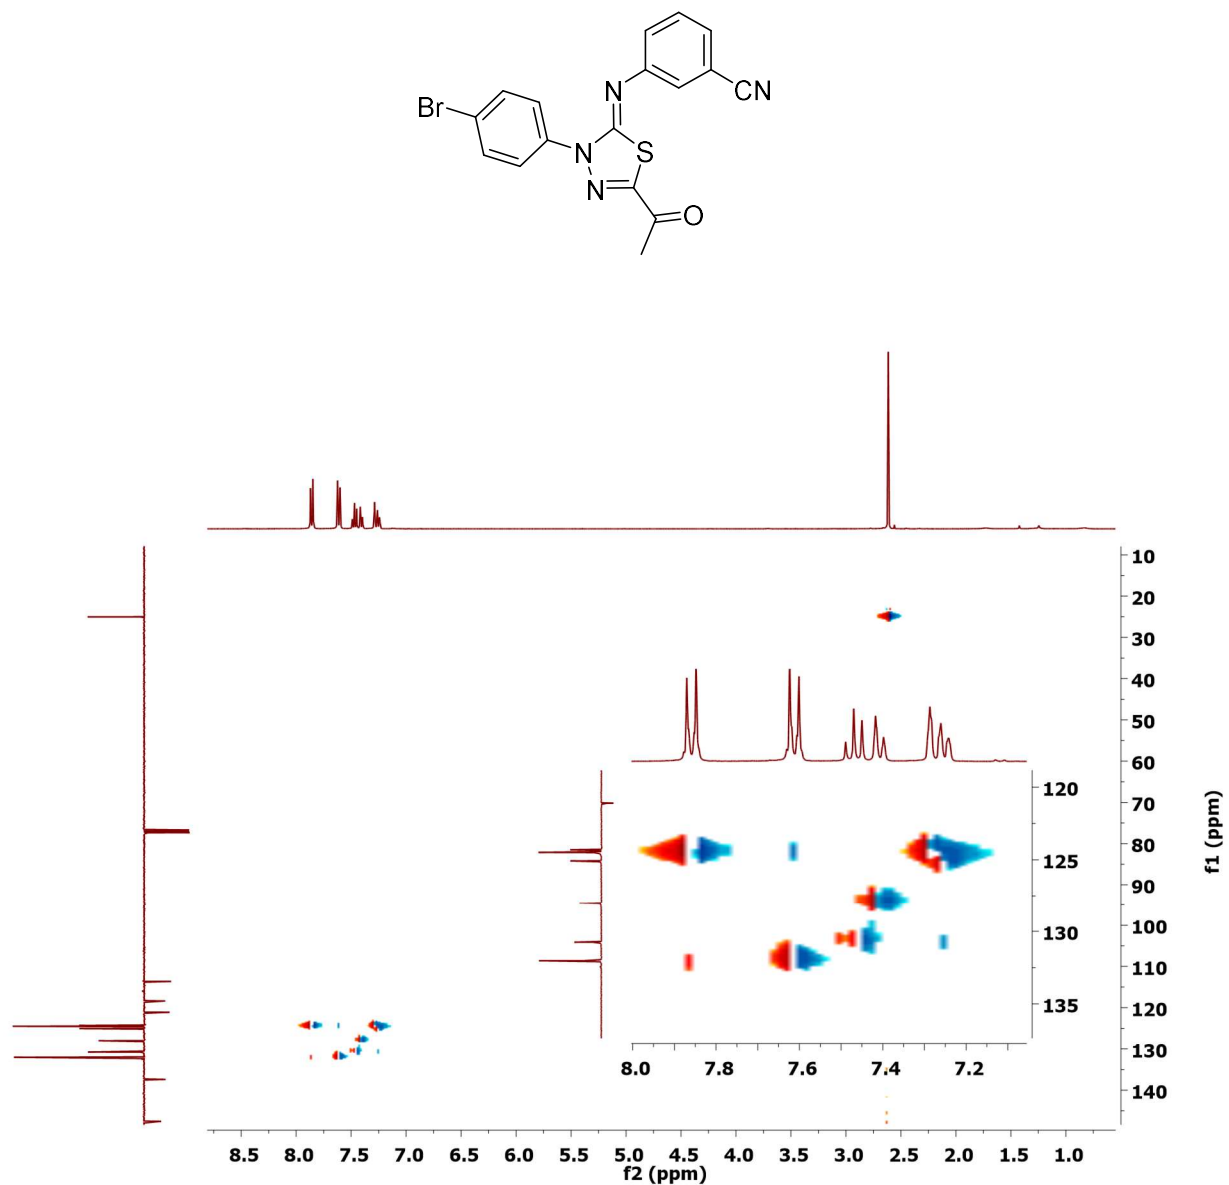



$^1\text{H}$ - $^{13}\text{C}$ -gHMBC NMR ( $\text{CDCl}_3$ ) spectrum of (Z)-3-((5-acetyl-3-(4-bromophenyl)-1,3,4-thiadiazol-2(3H)-ylidene)amino)benzonitrile

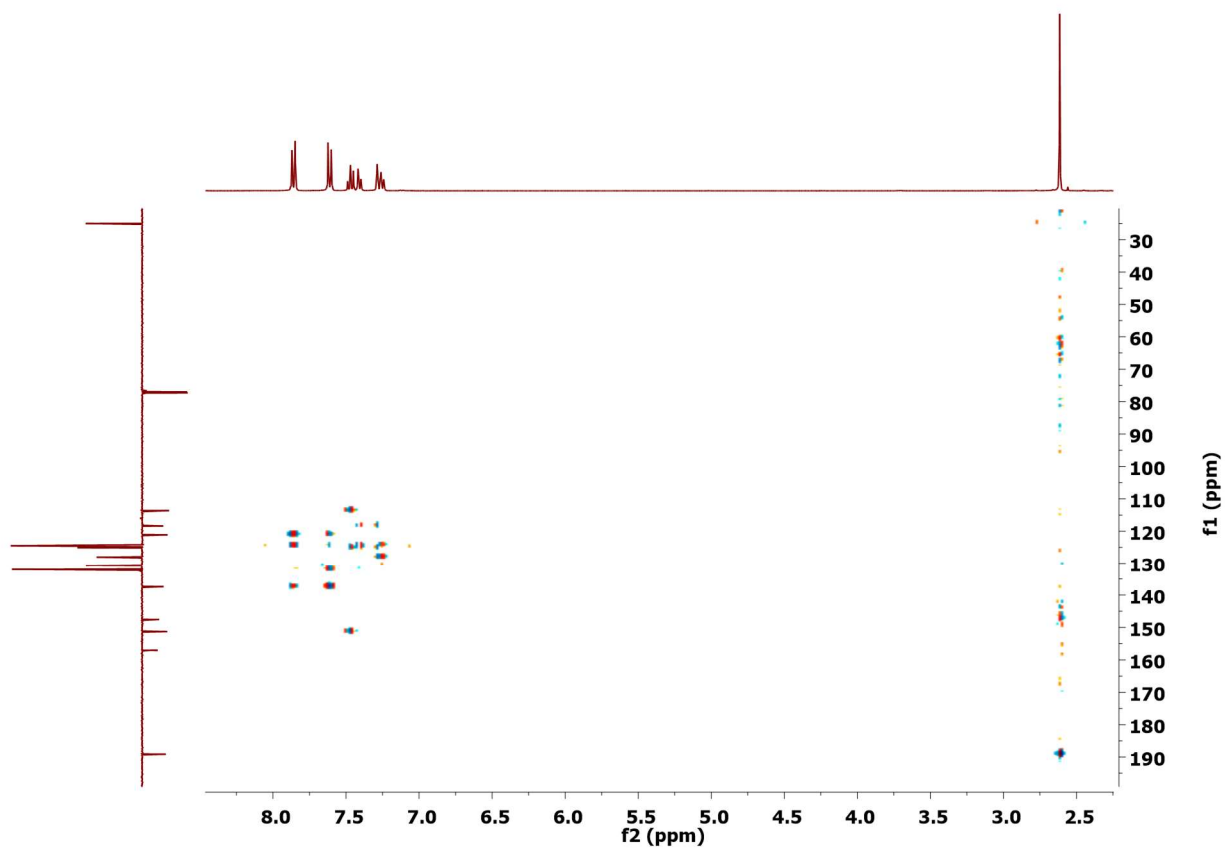

$^1\text{H}$  NMR ( $\text{CDCl}_3$ ) spectrum of (Z)-1-(5-((2-bromophenyl)imino)-4-(4-iodophenyl)-4,5-dihydro-1,3,4-thiadiazol-2-yl)ethan-1-one

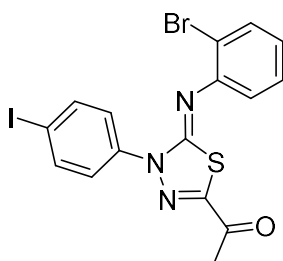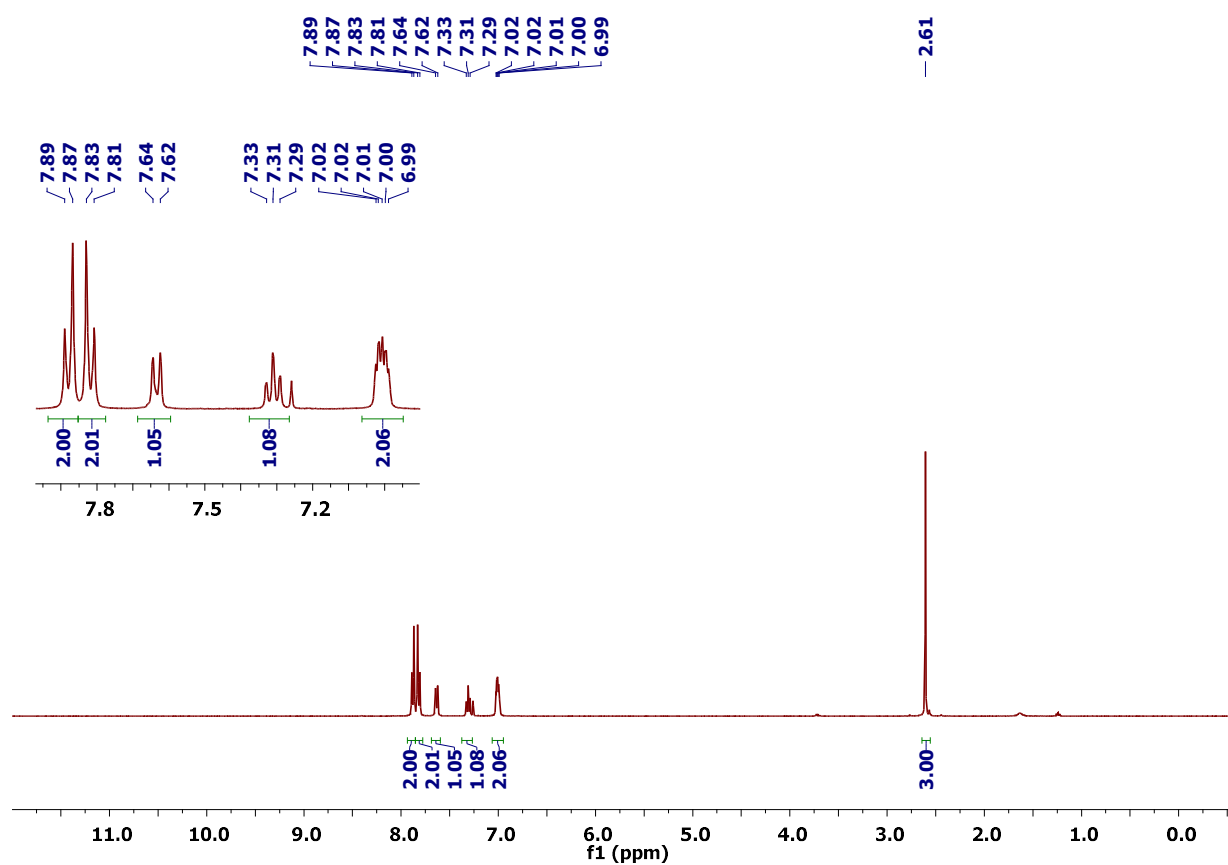

$^{13}\text{C}$  NMR ( $\text{CDCl}_3$ ) spectrum of (Z)-1-(5-((2-bromophenyl)imino)-4-(4-iodophenyl)-4,5-dihydro-1,3,4-thiadiazol-2-yl)ethan-1-one

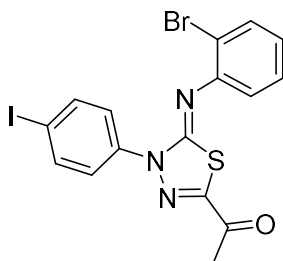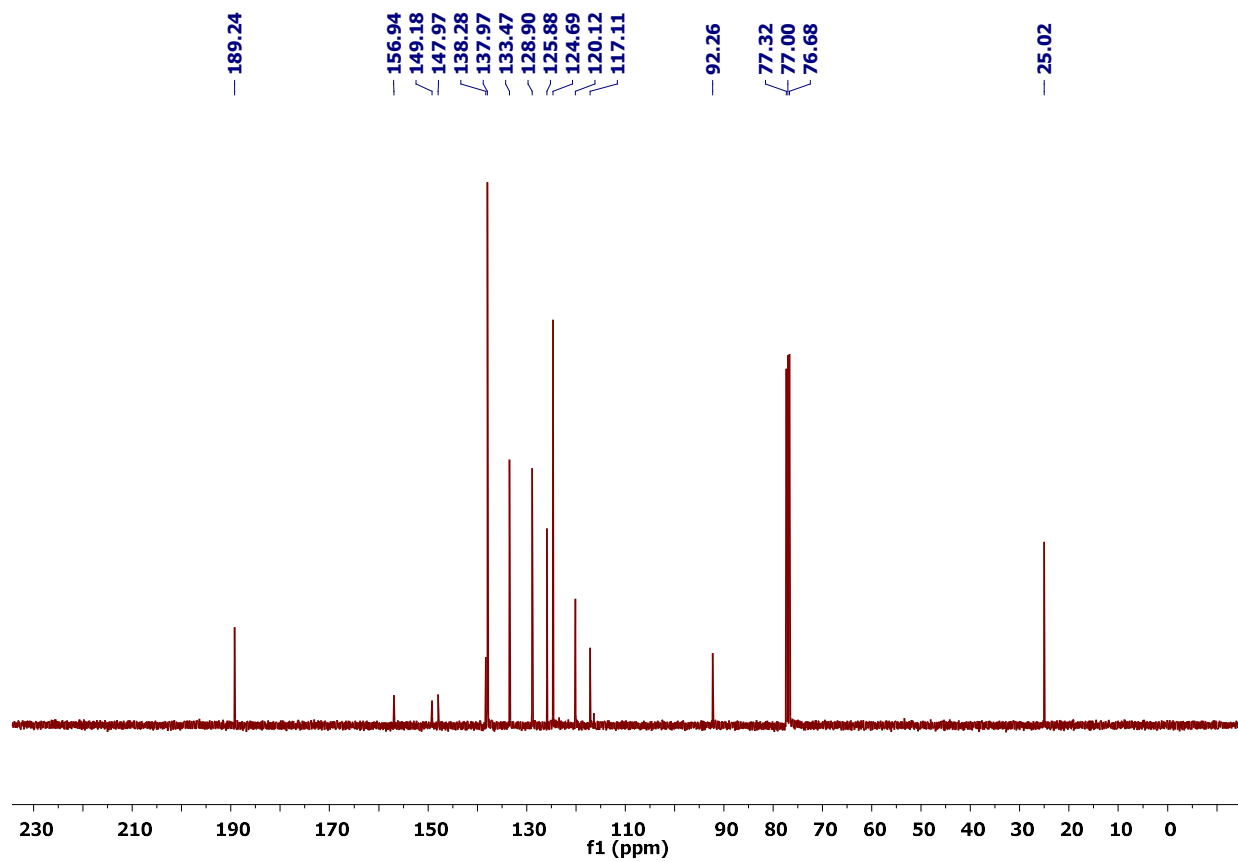

$^{13}\text{C}$  CRAPT NMR ( $\text{CDCl}_3$ ) spectrum of (Z)-1-(5-((2-bromophenyl)imino)-4-(4-iodophenyl)-4,5-dihydro-1,3,4-thiadiazol-2-yl)ethan-1-one

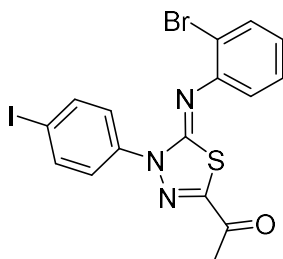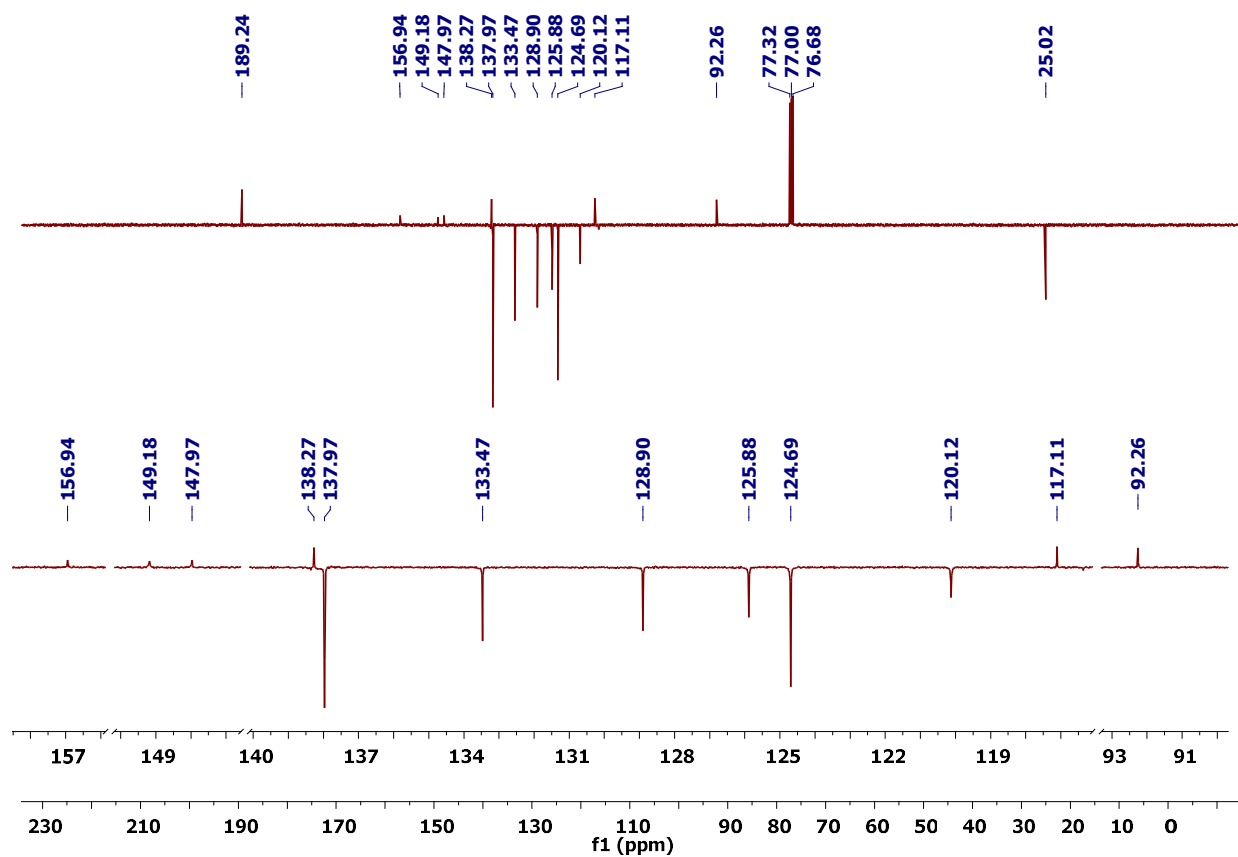

$^1\text{H}$ - $^1\text{H}$  gDQCOSY NMR ( $\text{CDCl}_3$ ) spectrum of (Z)-1-(5-((2-bromophenyl)imino)-4-(4-iodophenyl)-4,5-dihydro-1,3,4-thiadiazol-2-yl)ethan-1-one

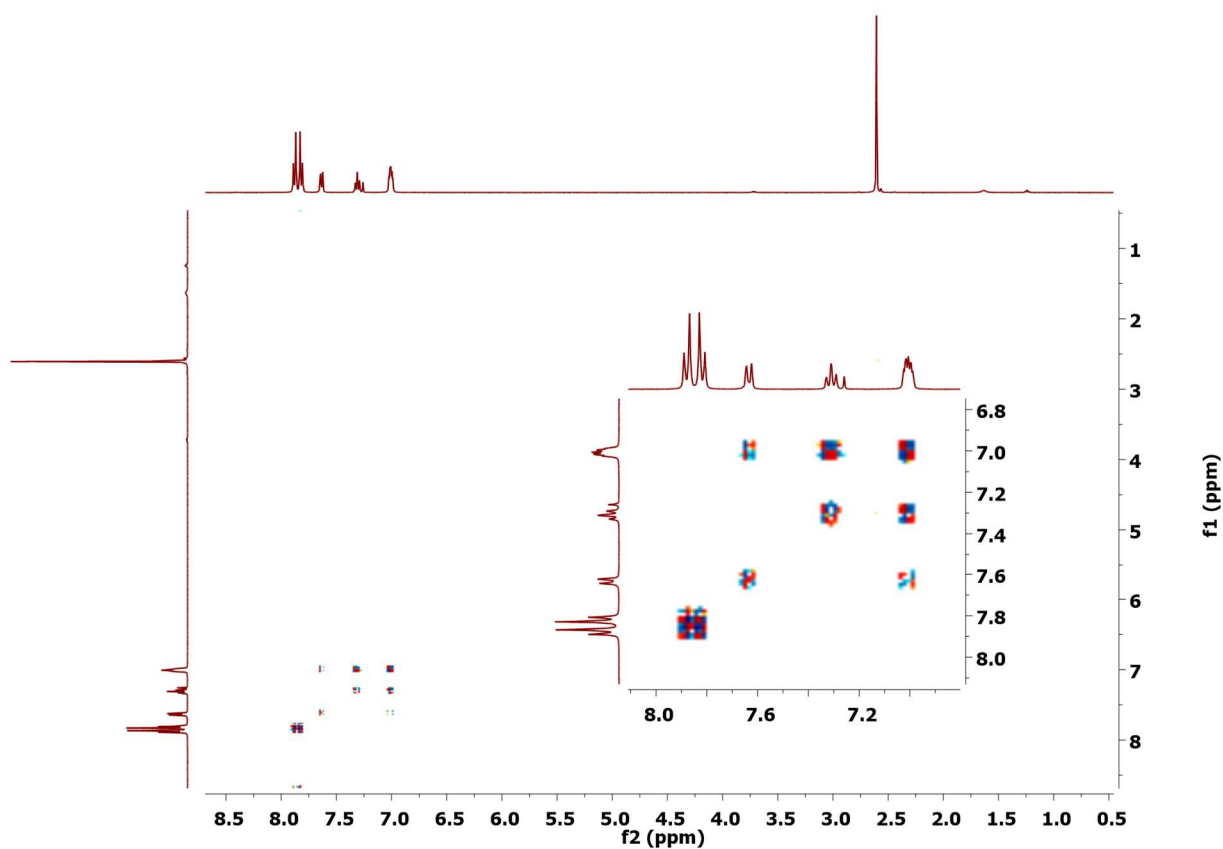

$^1\text{H}$ - $^{13}\text{C}$ -HSQC NMR ( $\text{CDCl}_3$ ) spectrum of (Z)-1-(5-((2-bromophenyl)imino)-4-(4-iodophenyl)-4,5-dihydro-1,3,4-thiadiazol-2-yl)ethan-1-one

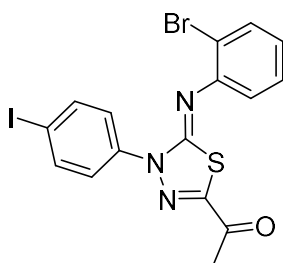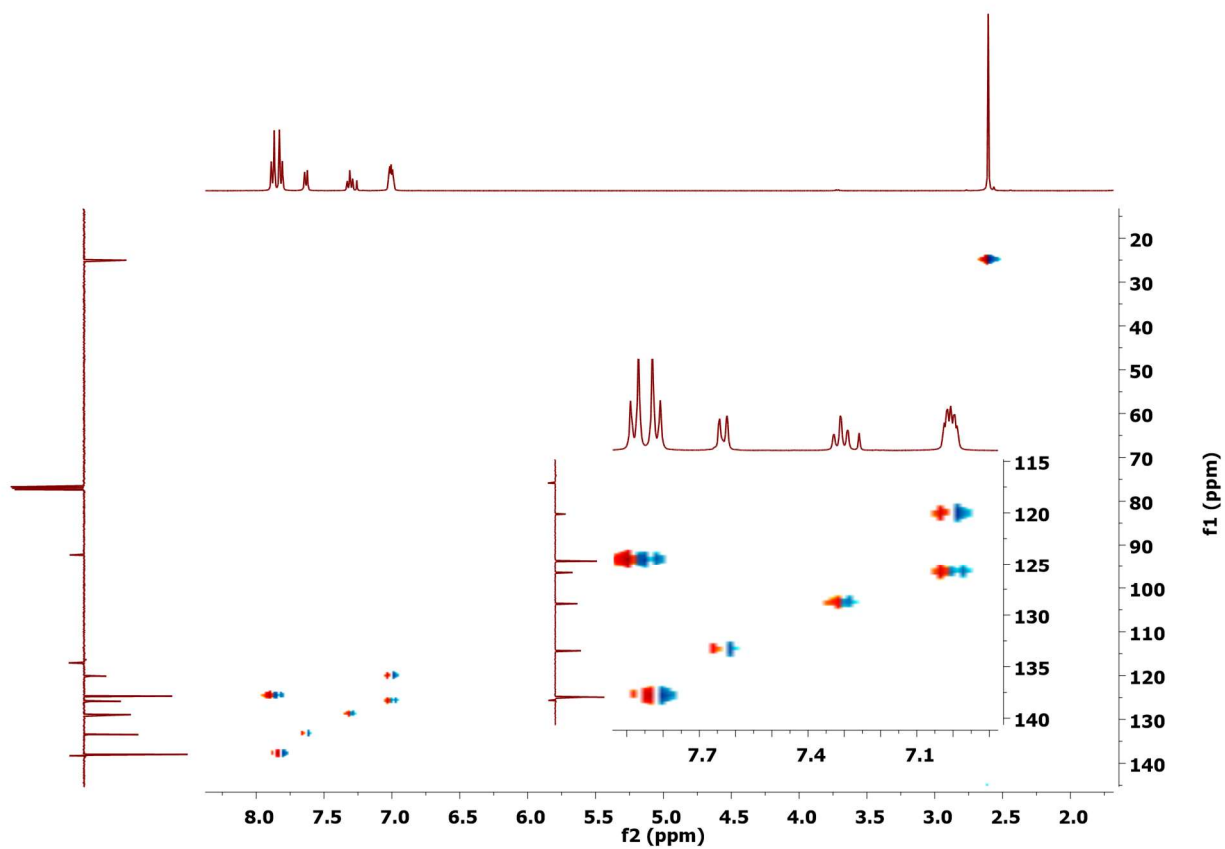

$^1\text{H}$ - $^{13}\text{C}$ -gHMBC NMR ( $\text{CDCl}_3$ ) spectrum of (Z)-1-(5-((2-bromophenyl)imino)-4-(4-iodophenyl)-4,5-dihydro-1,3,4-thiadiazol-2-yl)ethan-1-one

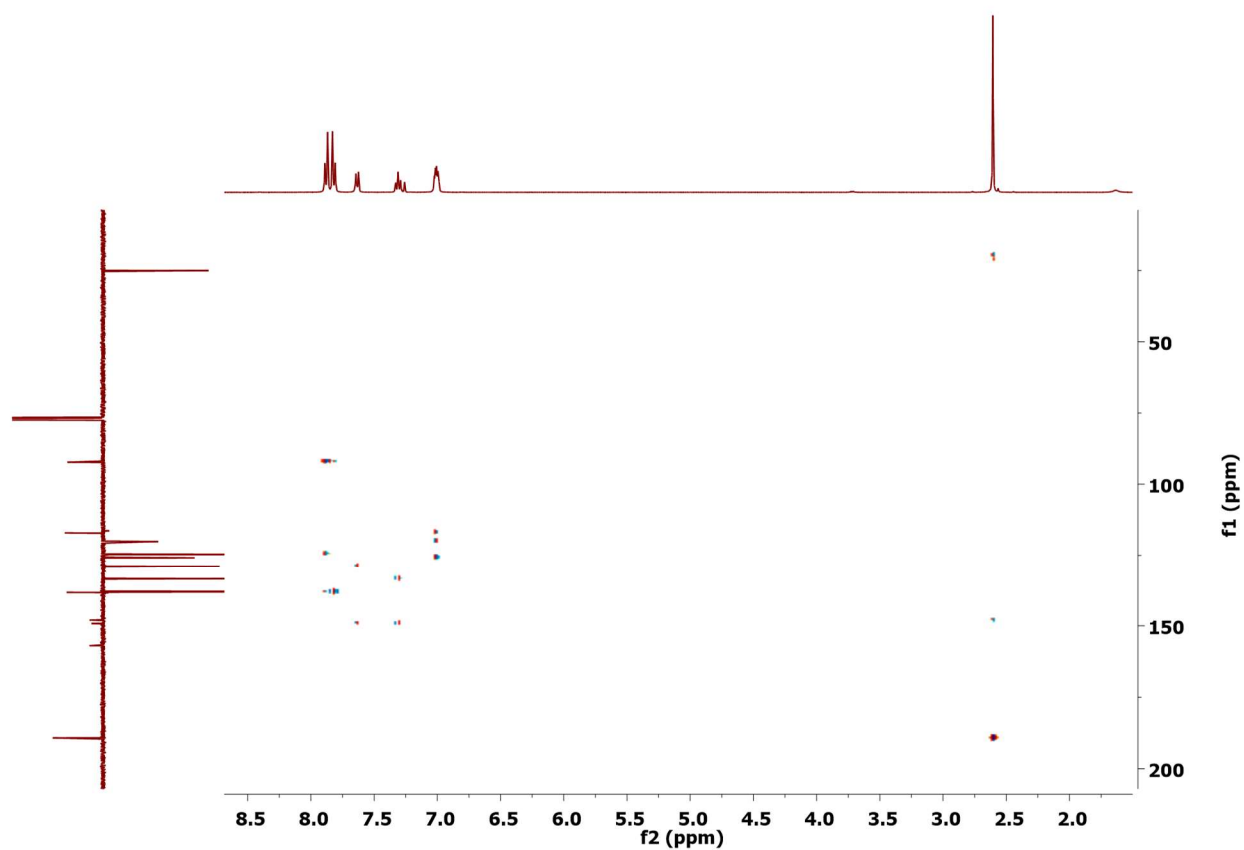

$^1\text{H}$  NMR ( $\text{CDCl}_3$ ) spectrum of (Z)-1-(4-(4-iodophenyl)-5-((2-(methylthio)phenyl)imino)-4,5-dihydro-1,3,4-thiadiazol-2-yl)ethan-1-one

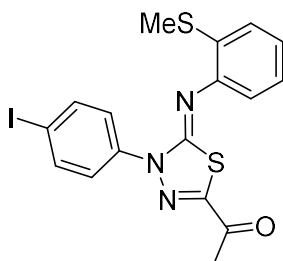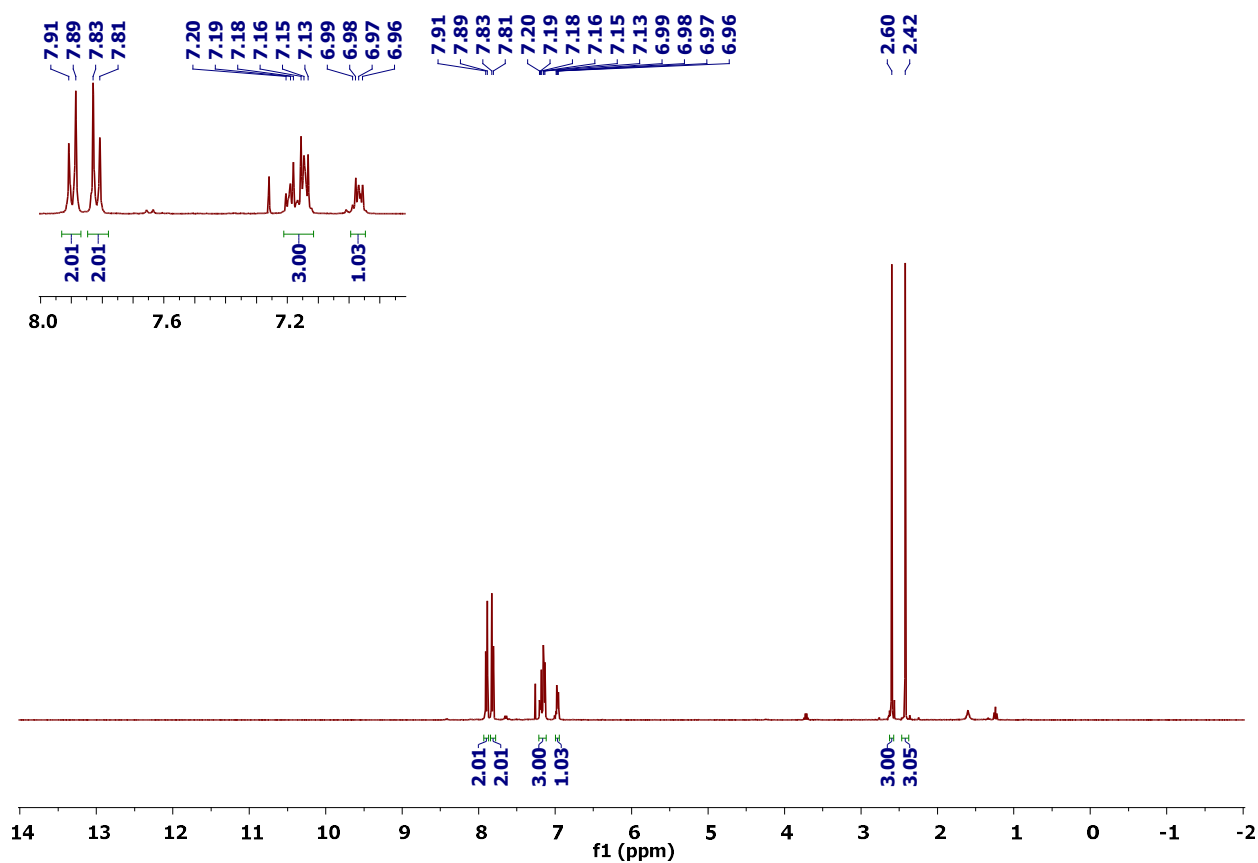



$^{13}\text{C}$  NMR ( $\text{CDCl}_3$ ) spectrum of (Z)-1-(4-(4-iodophenyl)-5-((2-(methylthio)phenyl)imino)-4,5-dihydro-1,3,4-thiadiazol-2-yl)ethan-1-one

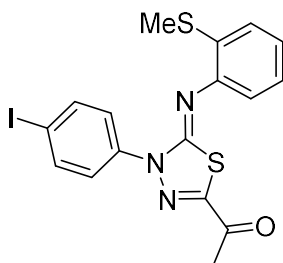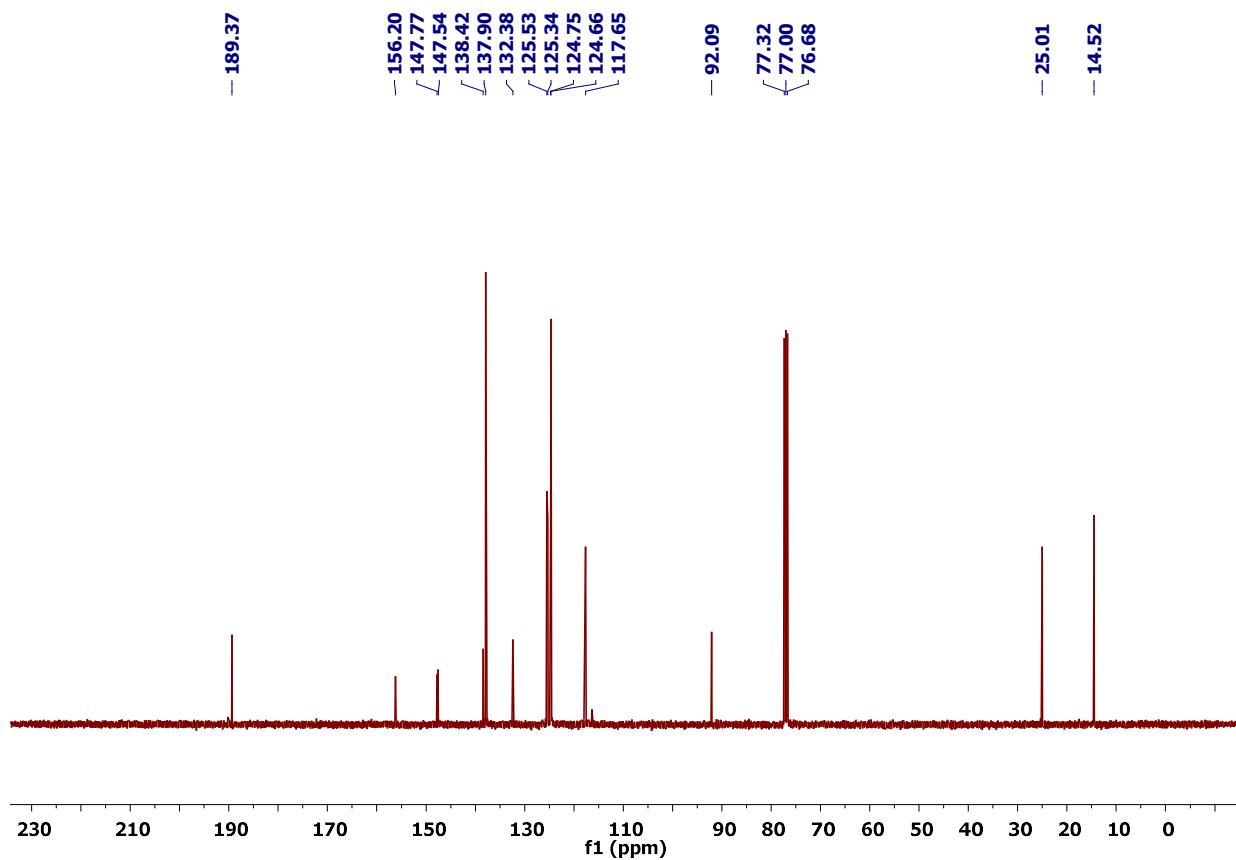

$^{13}\text{C}$  CRAPT NMR ( $\text{CDCl}_3$ ) spectrum of (Z)-1-(4-(4-iodophenyl)-5-((2-(methylthio)phenyl)imino)-4,5-dihydro-1,3,4-thiadiazol-2-yl)ethan-1-one

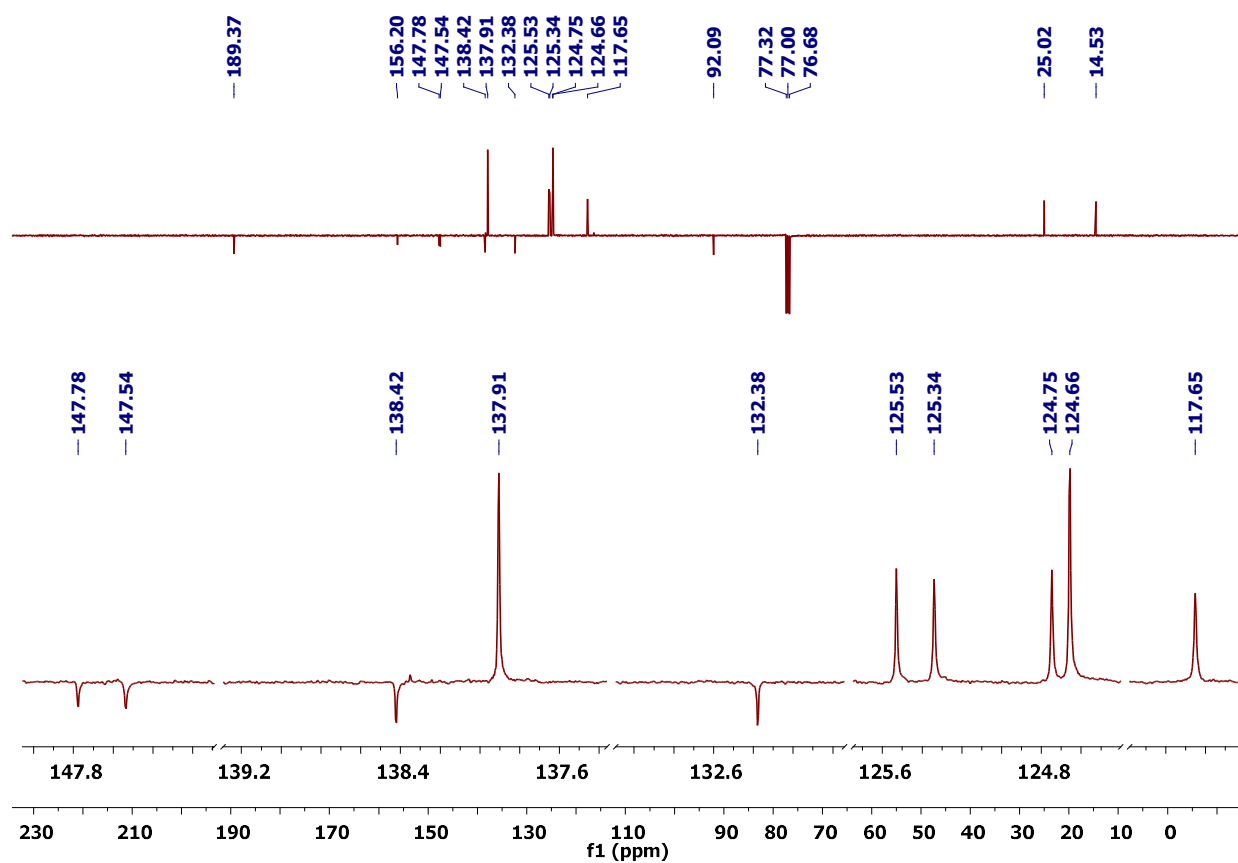

$^1\text{H}$ - $^1\text{H}$  gDQCOSY NMR ( $\text{CDCl}_3$ ) spectrum of (Z)-1-(4-(4-iodophenyl)-5-((2-(methylthio)phenyl)imino)-4,5-dihydro-1,3,4-thiadiazol-2-yl)ethan-1-one

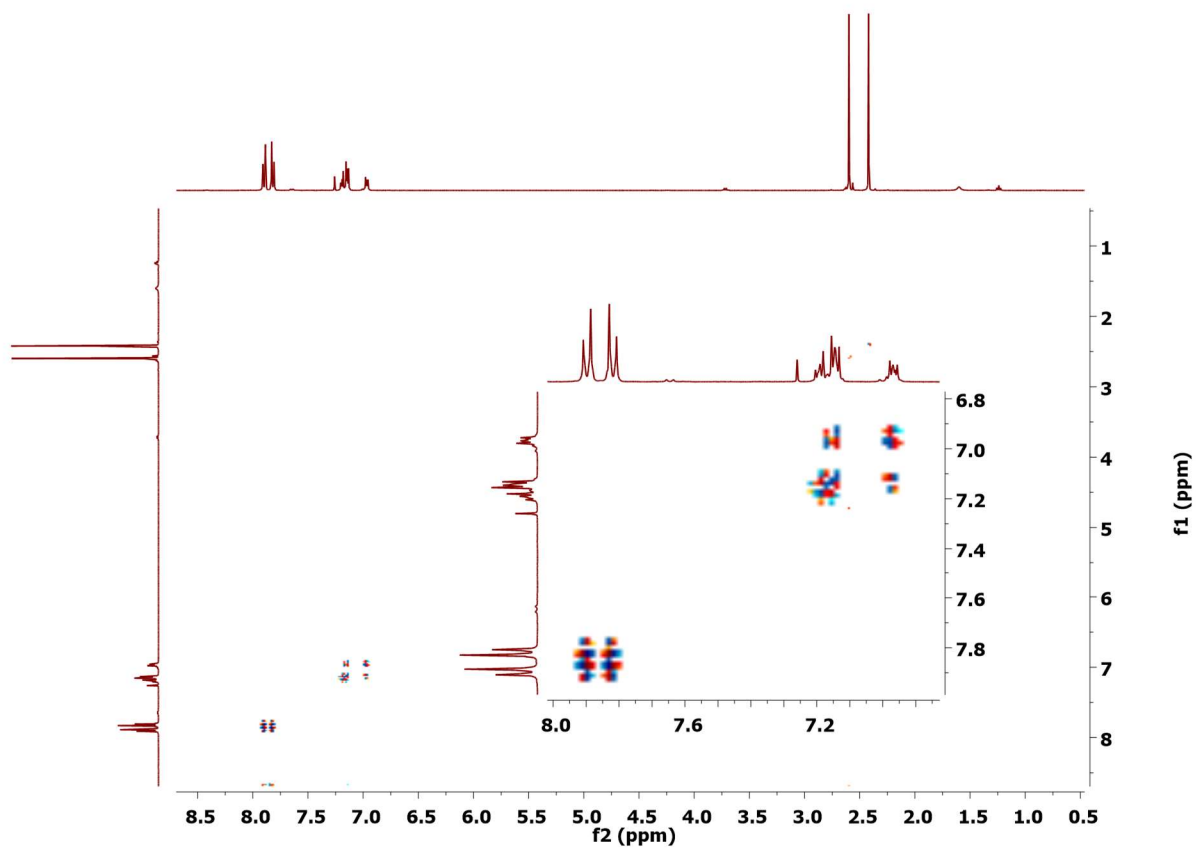

$^1\text{H}$ - $^{13}\text{C}$ -HSQC NMR ( $\text{CDCl}_3$ ) spectrum of (Z)-1-(4-(4-iodophenyl)-5-((2-(methylthio)phenyl)imino)-4,5-dihydro-1,3,4-thiadiazol-2-yl)ethan-1-one

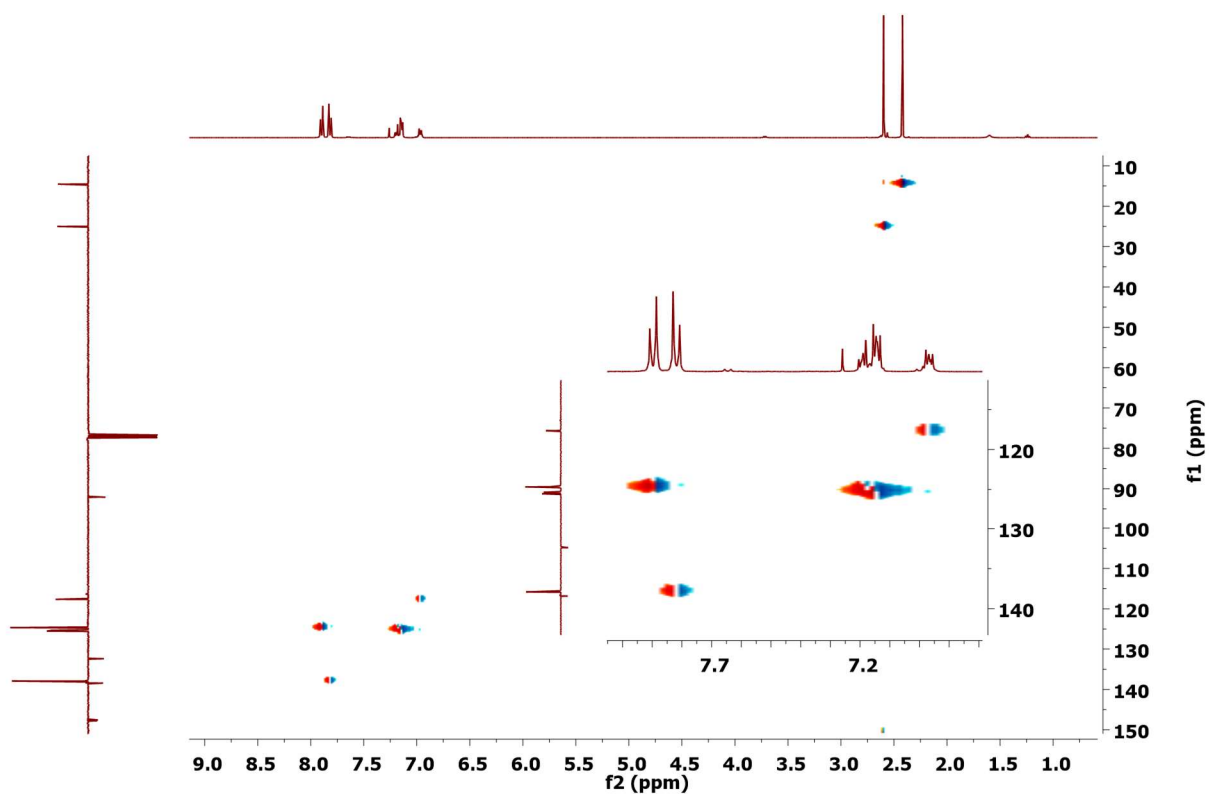

$^1\text{H}$ - $^{13}\text{C}$ -gHMBC NMR ( $\text{CDCl}_3$ ) spectrum of (Z)-1-(4-(4-iodophenyl)-5-((2-(methylthio)phenyl)imino)-4,5-dihydro-1,3,4-thiadiazol-2-yl)ethan-1-one

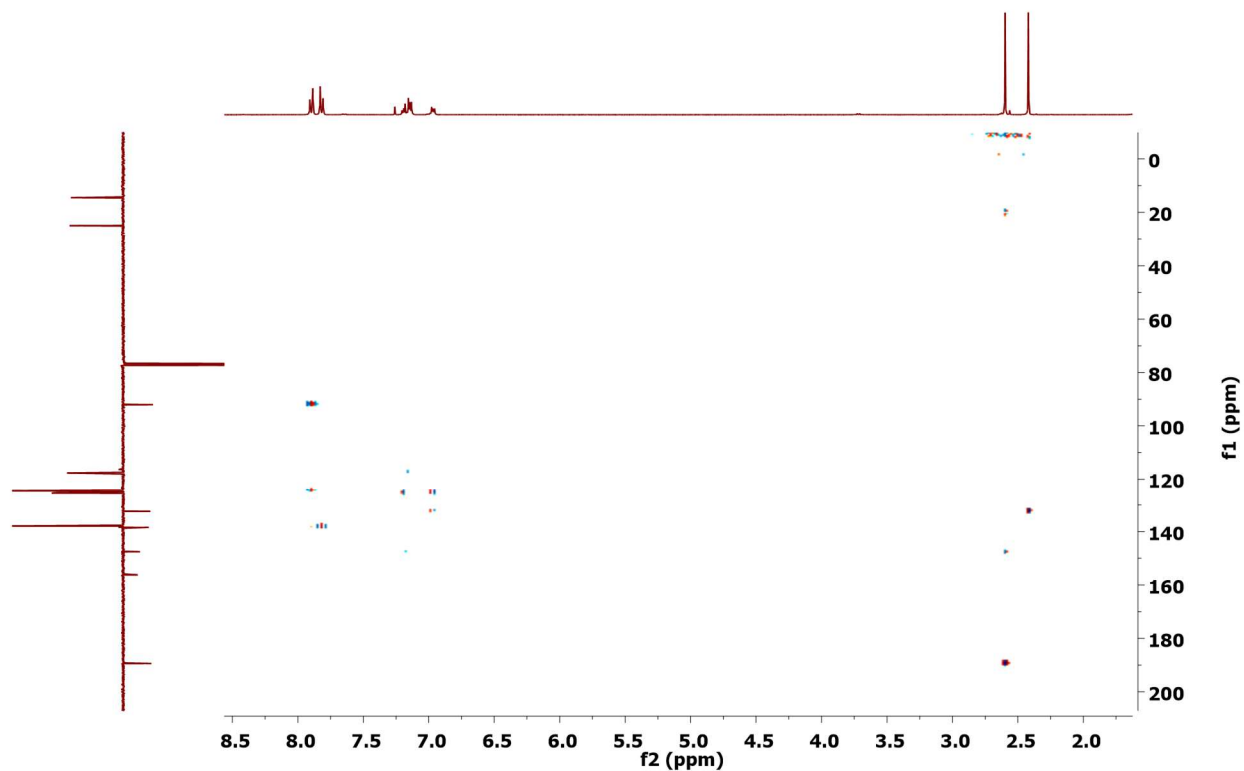

$^1\text{H}$  NMR ( $\text{CDCl}_3$ ) spectrum of (Z)-1-(4-(4-iodophenyl)-5-((2-(trifluoromethyl)phenyl)imino)-4,5-dihydro-1,3,4-thiadiazol-2-yl)ethan-1-one

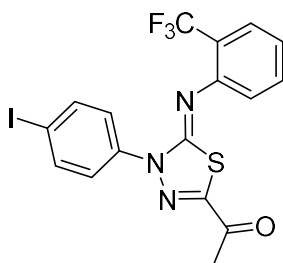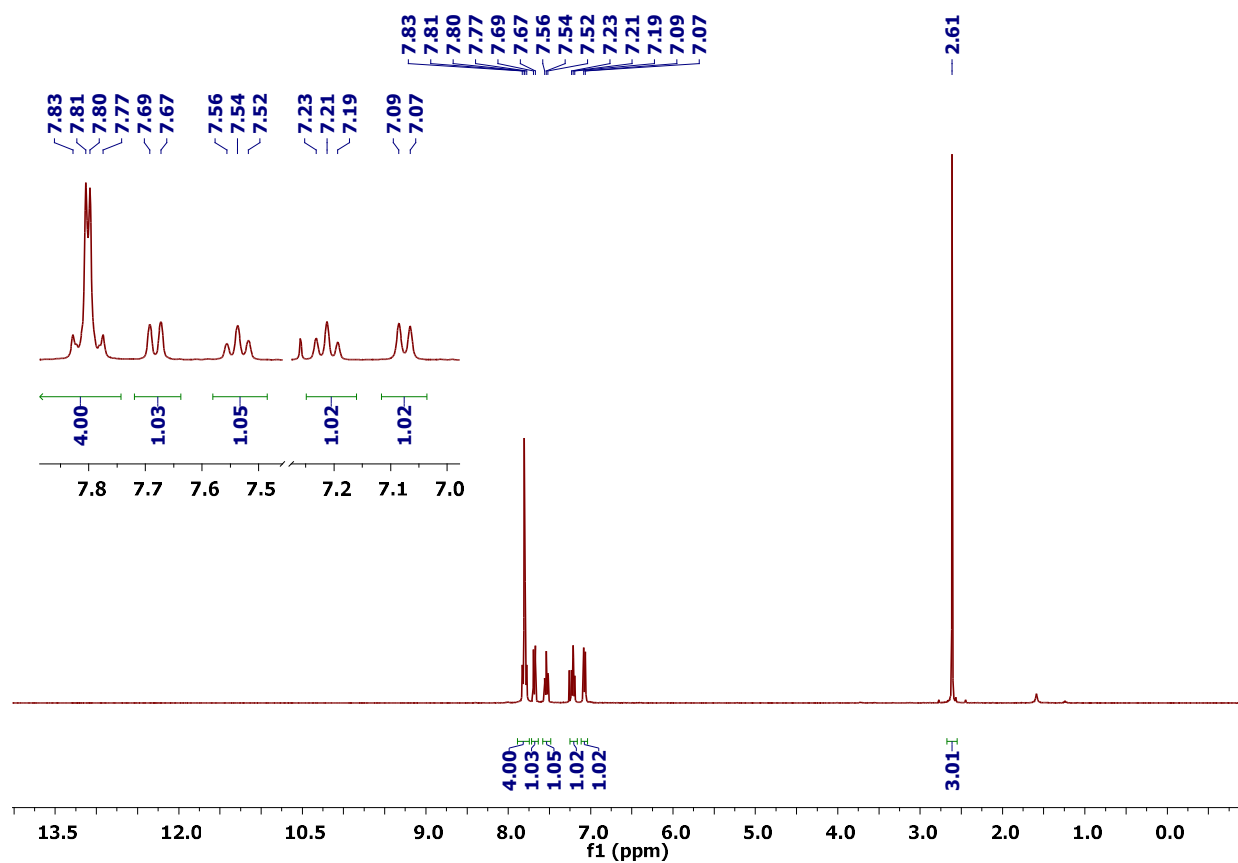

$^{13}\text{C}$  NMR ( $\text{CDCl}_3$ ) spectrum of (Z)-1-(4-(4-iodophenyl)-5-((2-(trifluoromethyl)phenyl)imino)-4,5-dihydro-1,3,4-thiadiazol-2-yl)ethan-1-one

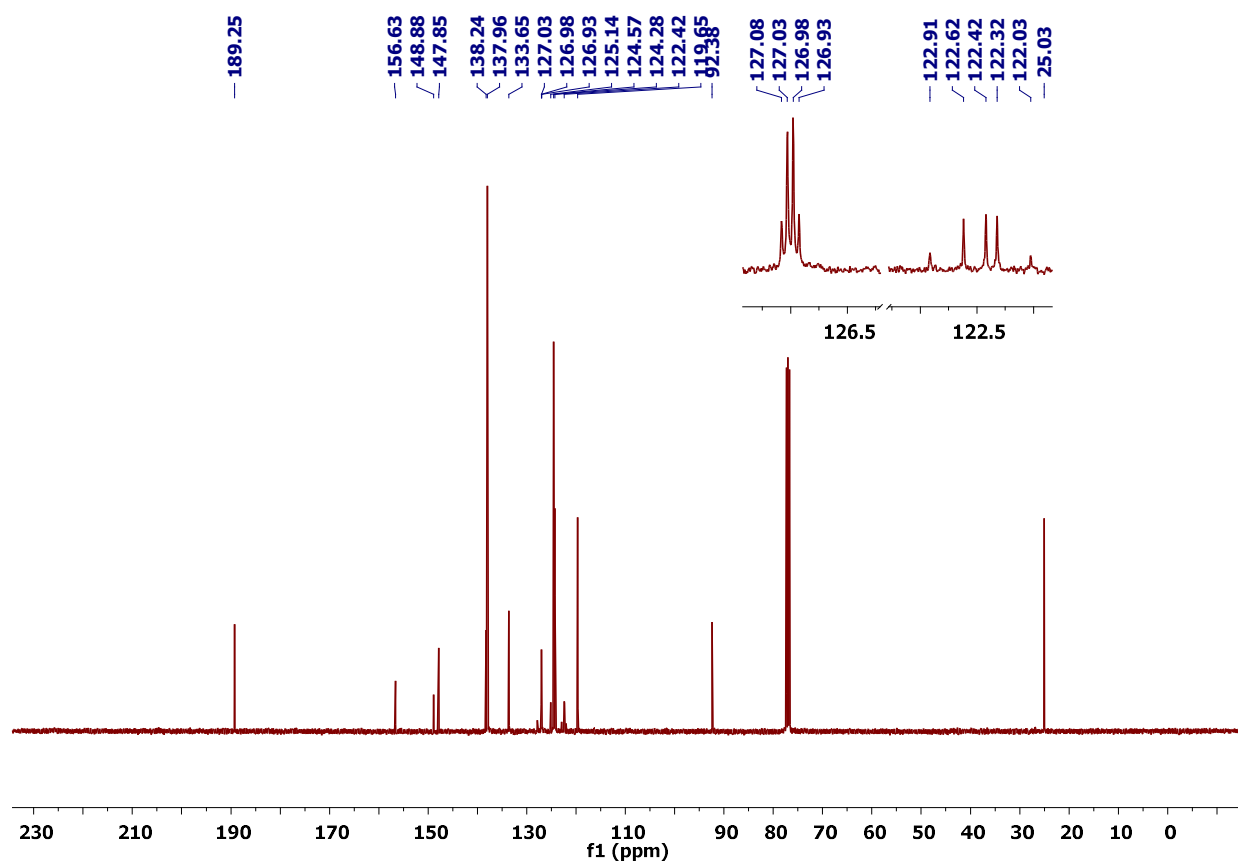

$^{13}\text{C}$  CRAPT NMR ( $\text{CDCl}_3$ ) spectrum of (Z)-1-(4-(4-iodophenyl)-5-((2-(trifluoromethyl)phenyl)imino)-4,5-dihydro-1,3,4-thiadiazol-2-yl)ethan-1-one

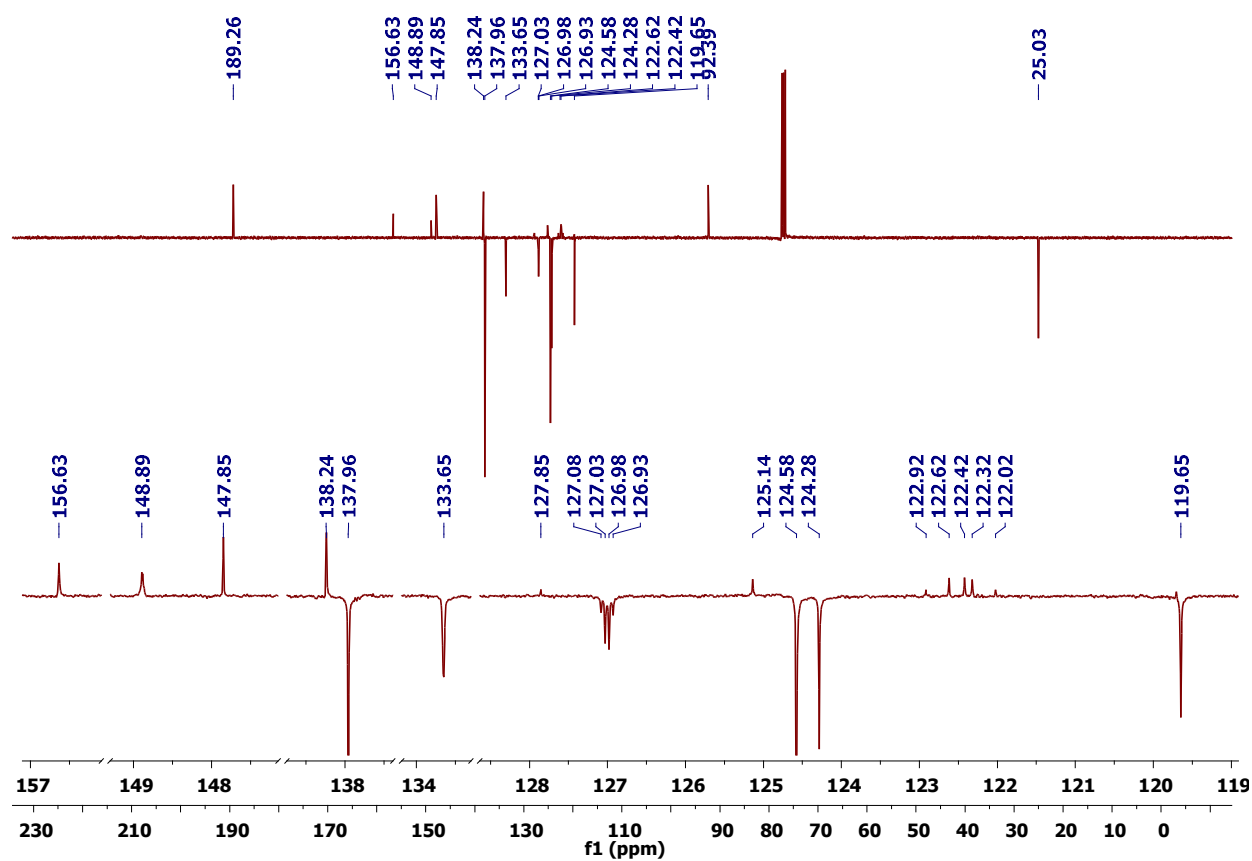



$^1\text{H}$ - $^1\text{H}$  gDQCOSY NMR ( $\text{CDCl}_3$ ) spectrum of (Z)-1-(4-(4-iodophenyl)-5-((2-(trifluoromethyl)phenyl)imino)-4,5-dihydro-1,3,4-thiadiazol-2-yl)ethan-1-one

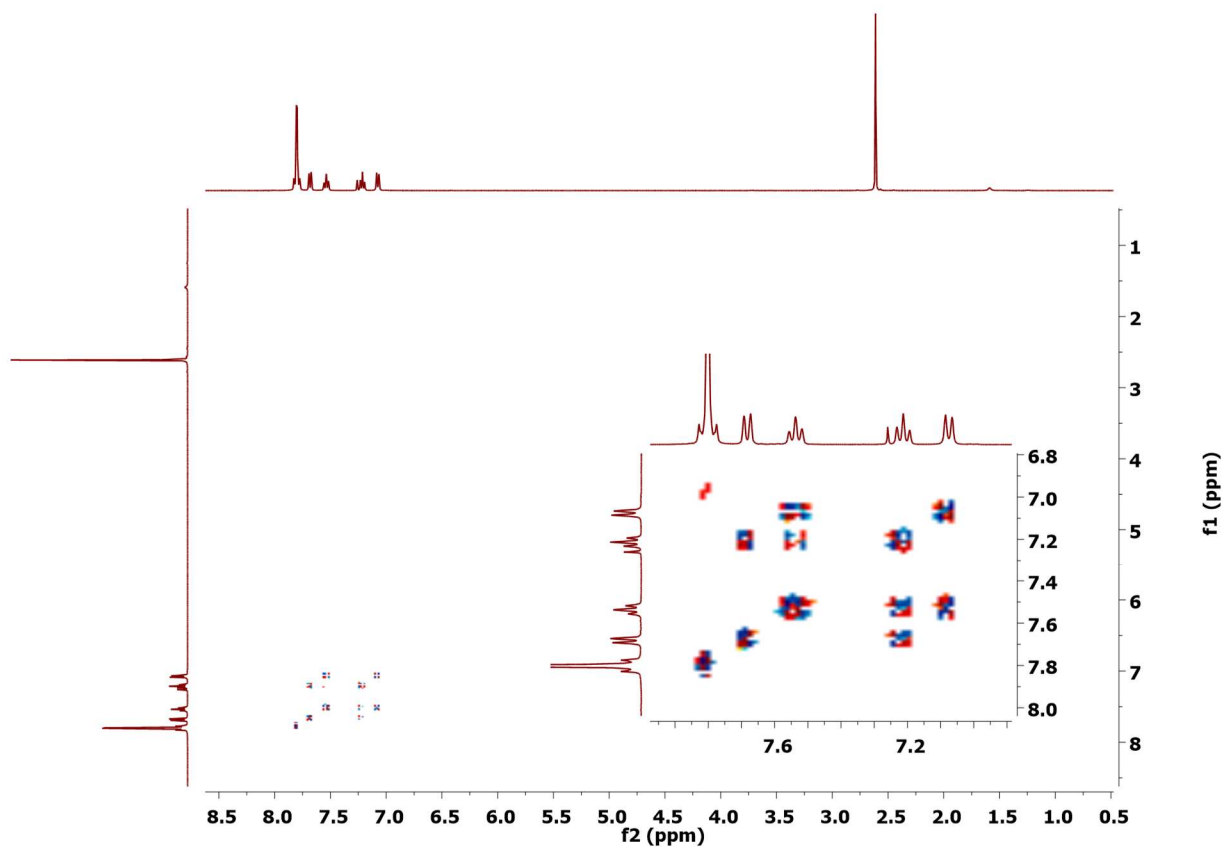

$^1\text{H}$ - $^{13}\text{C}$ -HSQC NMR ( $\text{CDCl}_3$ ) spectrum of (Z)-1-(4-(4-iodophenyl)-5-((2-(trifluoromethyl)phenyl)imino)-4,5-dihydro-1,3,4-thiadiazol-2-yl)ethan-1-one

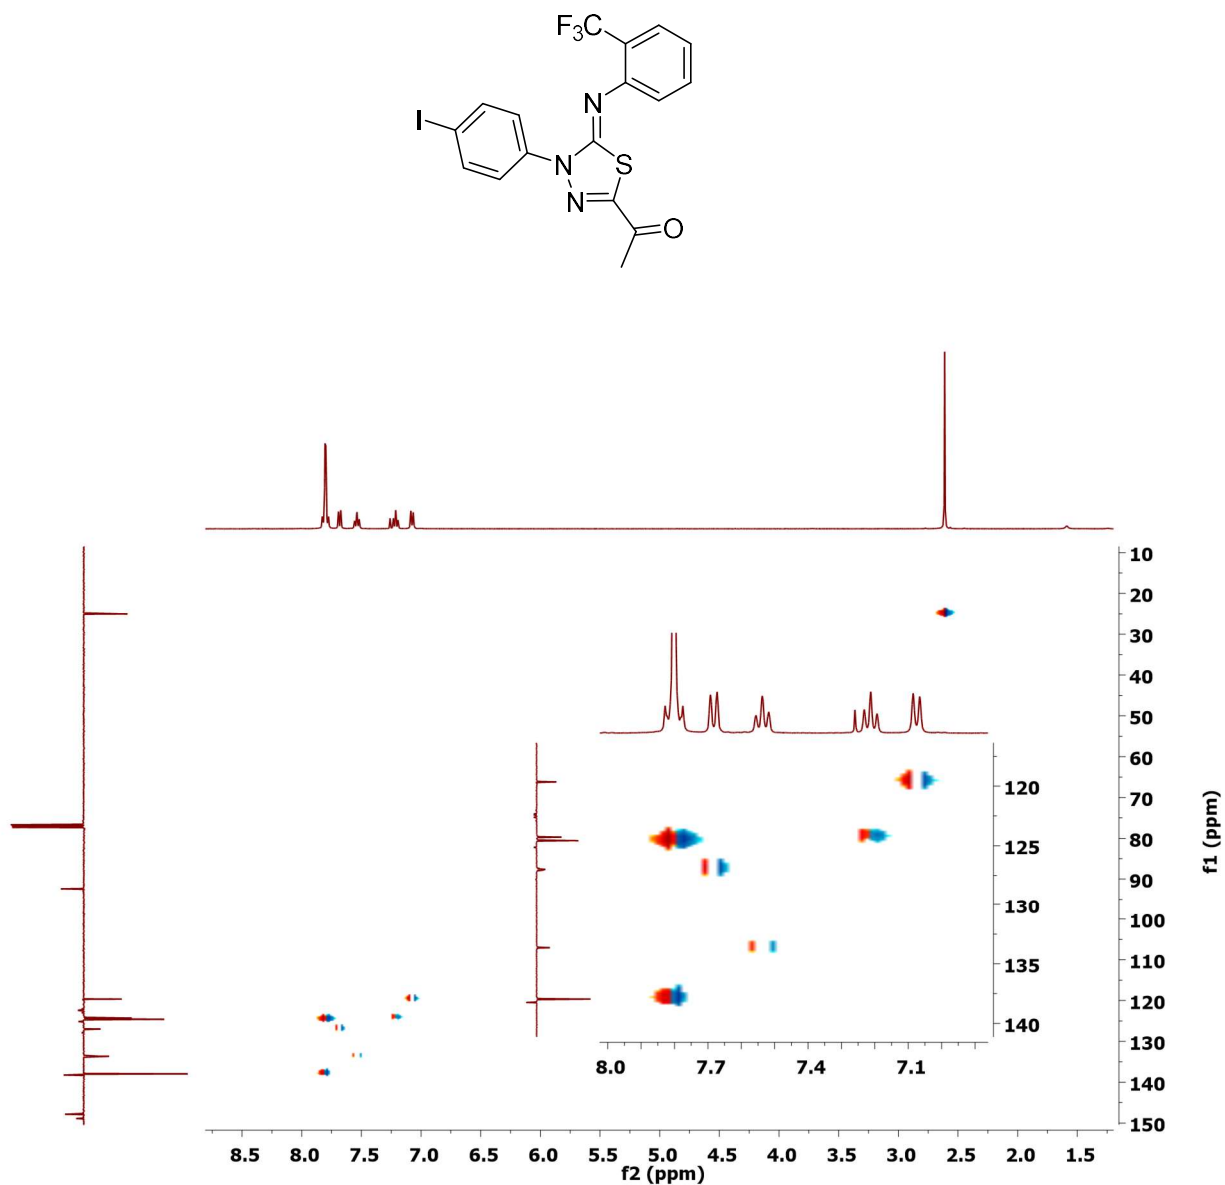

$^1\text{H}$ - $^{13}\text{C}$ -gHMBC NMR ( $\text{CDCl}_3$ ) spectrum of (Z)-1-(4-(4-iodophenyl)-5-((2-(trifluoromethyl)phenyl)imino)-4,5-dihydro-1,3,4-thiadiazol-2-yl)ethan-1-one

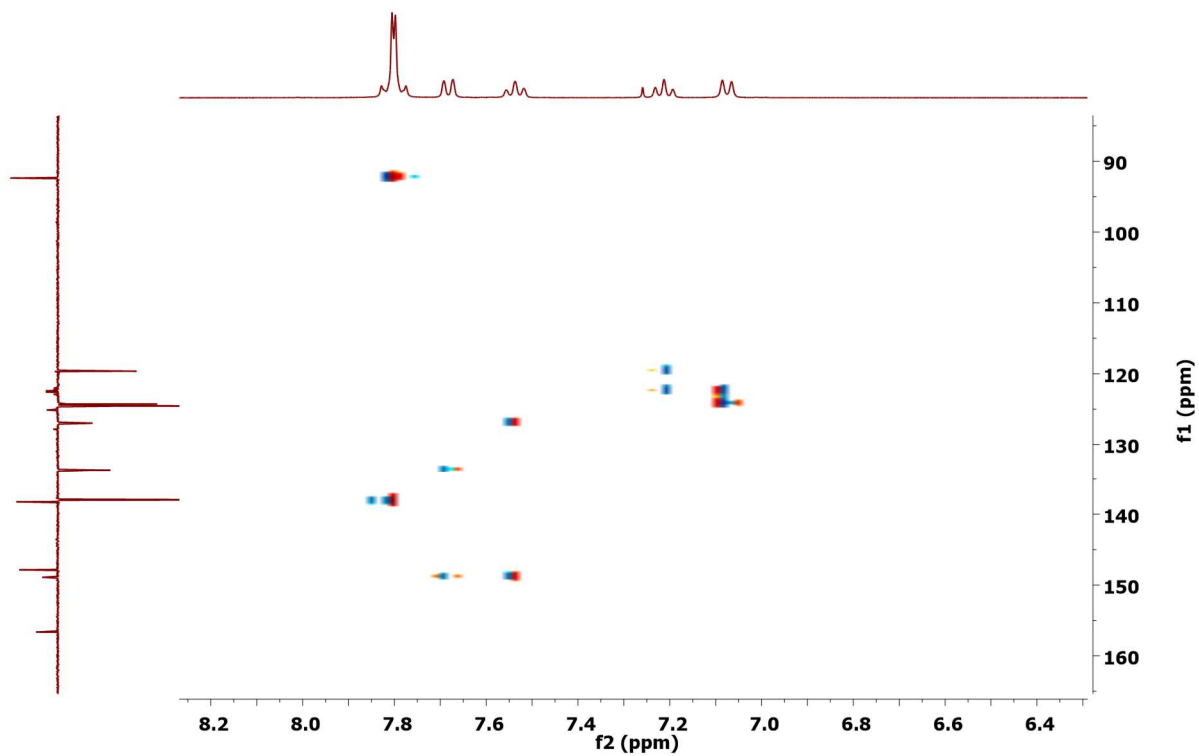

$^1\text{H}$  NMR ( $\text{CDCl}_3$ ) spectrum of (Z)-1-(5-((2,4-dimethylphenyl)imino)-4-(4-iodophenyl)-4,5-dihydro-1,3,4-thiadiazol-2-yl)ethan-1-one

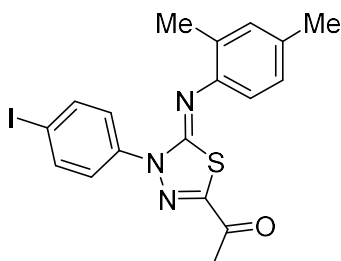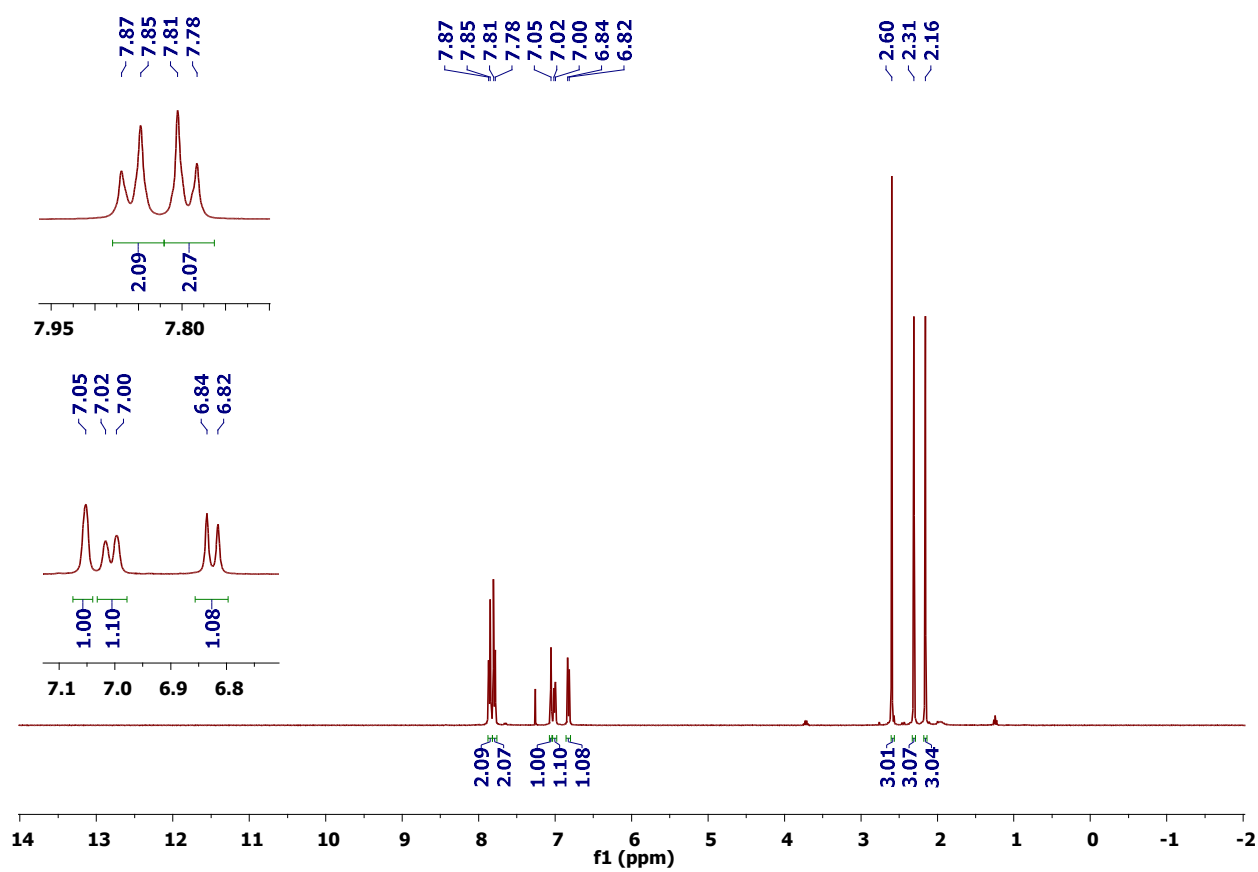

$^{13}\text{C}$  NMR ( $\text{CDCl}_3$ ) spectrum of (Z)-1-(5-((2,4-dimethylphenyl)imino)-4-(4-iodophenyl)-4,5-dihydro-1,3,4-thiadiazol-2-yl)ethan-1-one

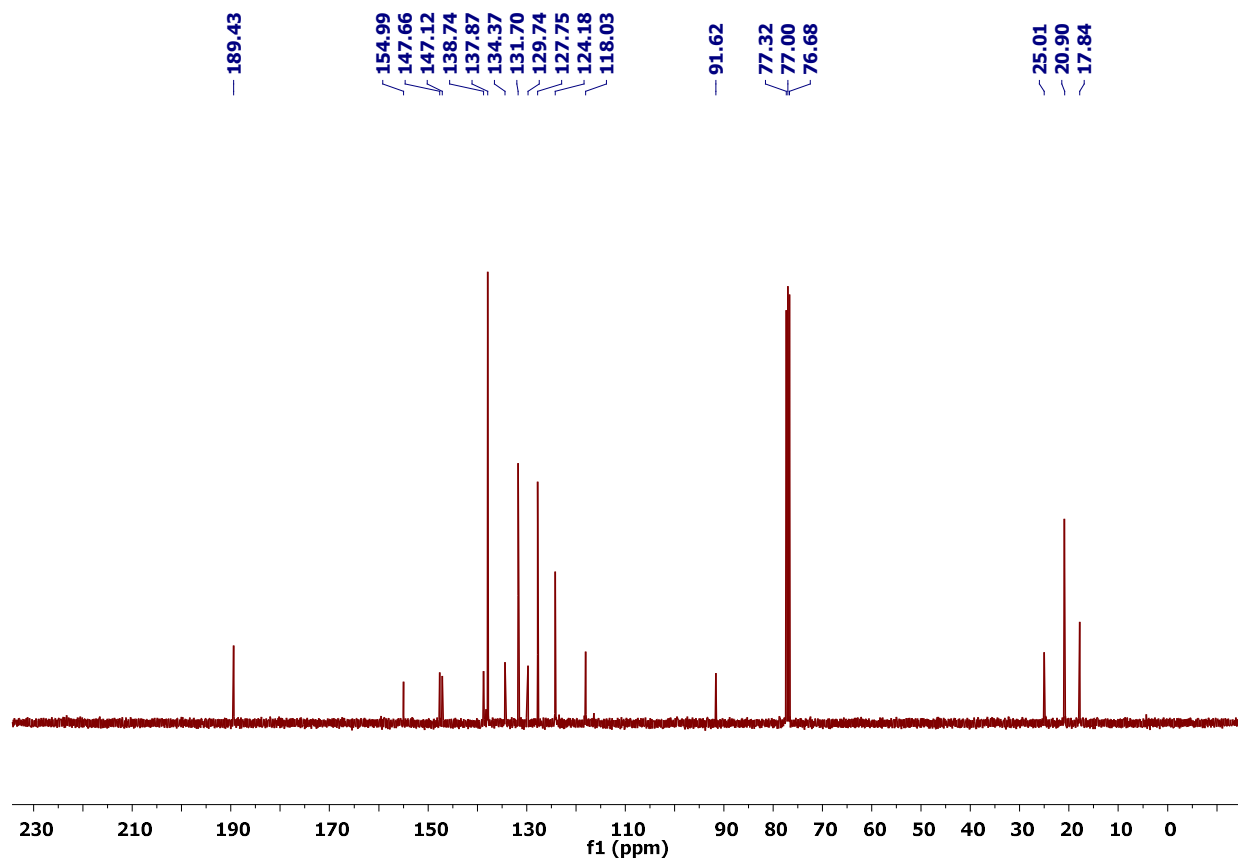

$^{13}\text{C}$  CRAPT NMR ( $\text{CDCl}_3$ ) spectrum of (Z)-1-(5-((2,4-dimethylphenyl)imino)-4-(4-iodophenyl)-4,5-dihydro-1,3,4-thiadiazol-2-yl)ethan-1-one

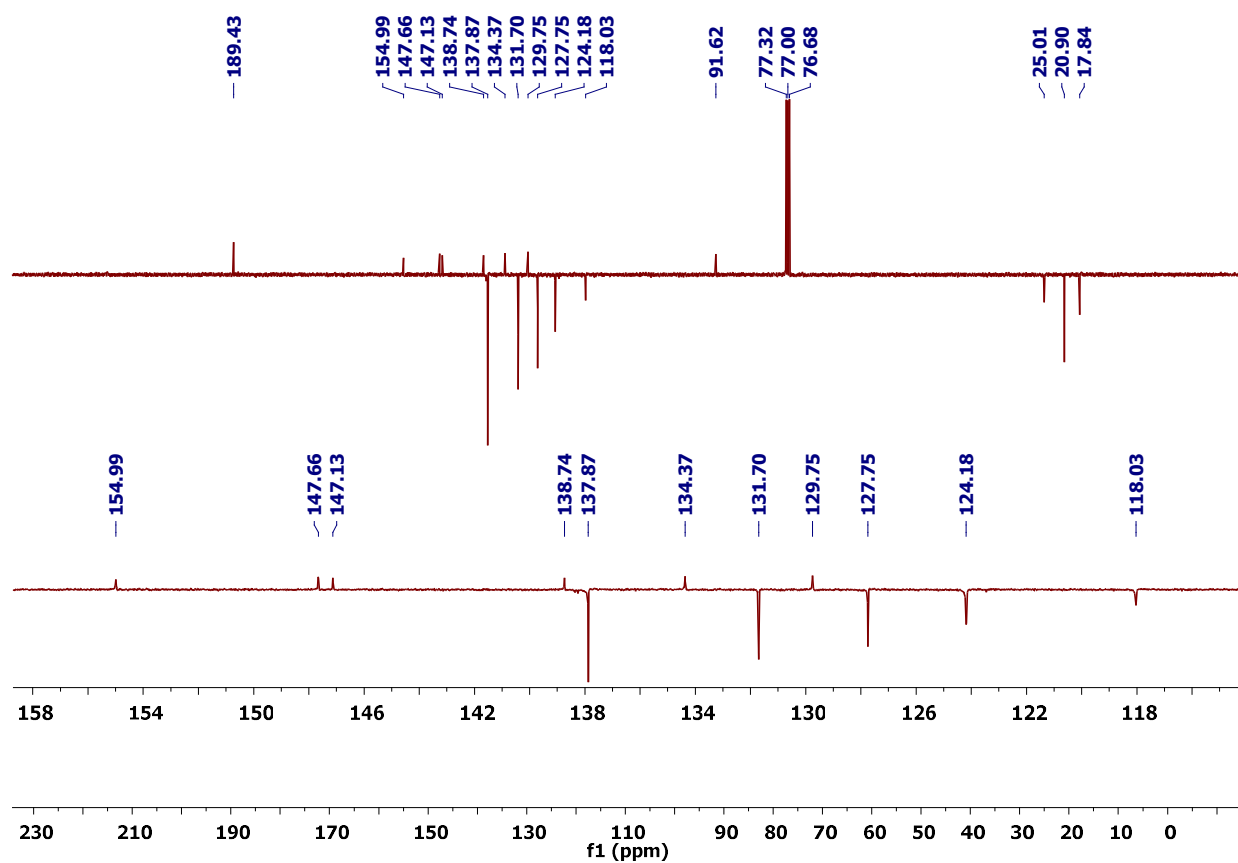

$^1\text{H}$ - $^1\text{H}$  gDQCOSY NMR ( $\text{CDCl}_3$ ) spectrum of (Z)-1-(5-((2,4-dimethylphenyl)imino)-4-(4-iodophenyl)-4,5-dihydro-1,3,4-thiadiazol-2-yl)ethan-1-one

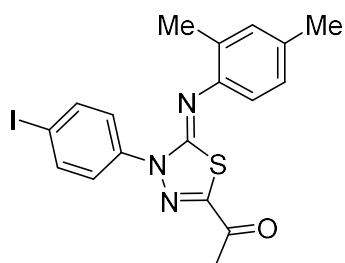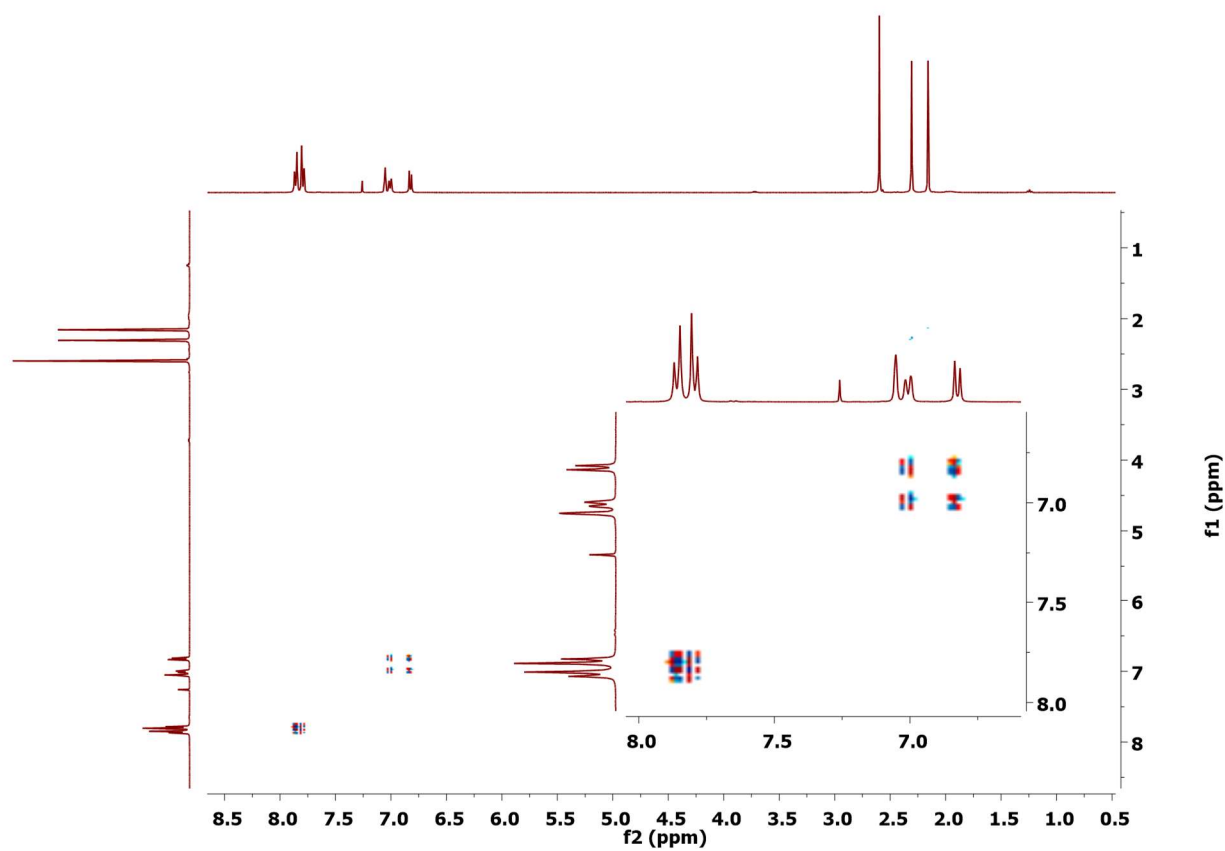

$^1\text{H}$ - $^{13}\text{C}$ -HSQC NMR ( $\text{CDCl}_3$ ) spectrum of (Z)-1-(5-((2,4-dimethylphenyl)imino)-4-(4-iodophenyl)-4,5-dihydro-1,3,4-thiadiazol-2-yl)ethan-1-one

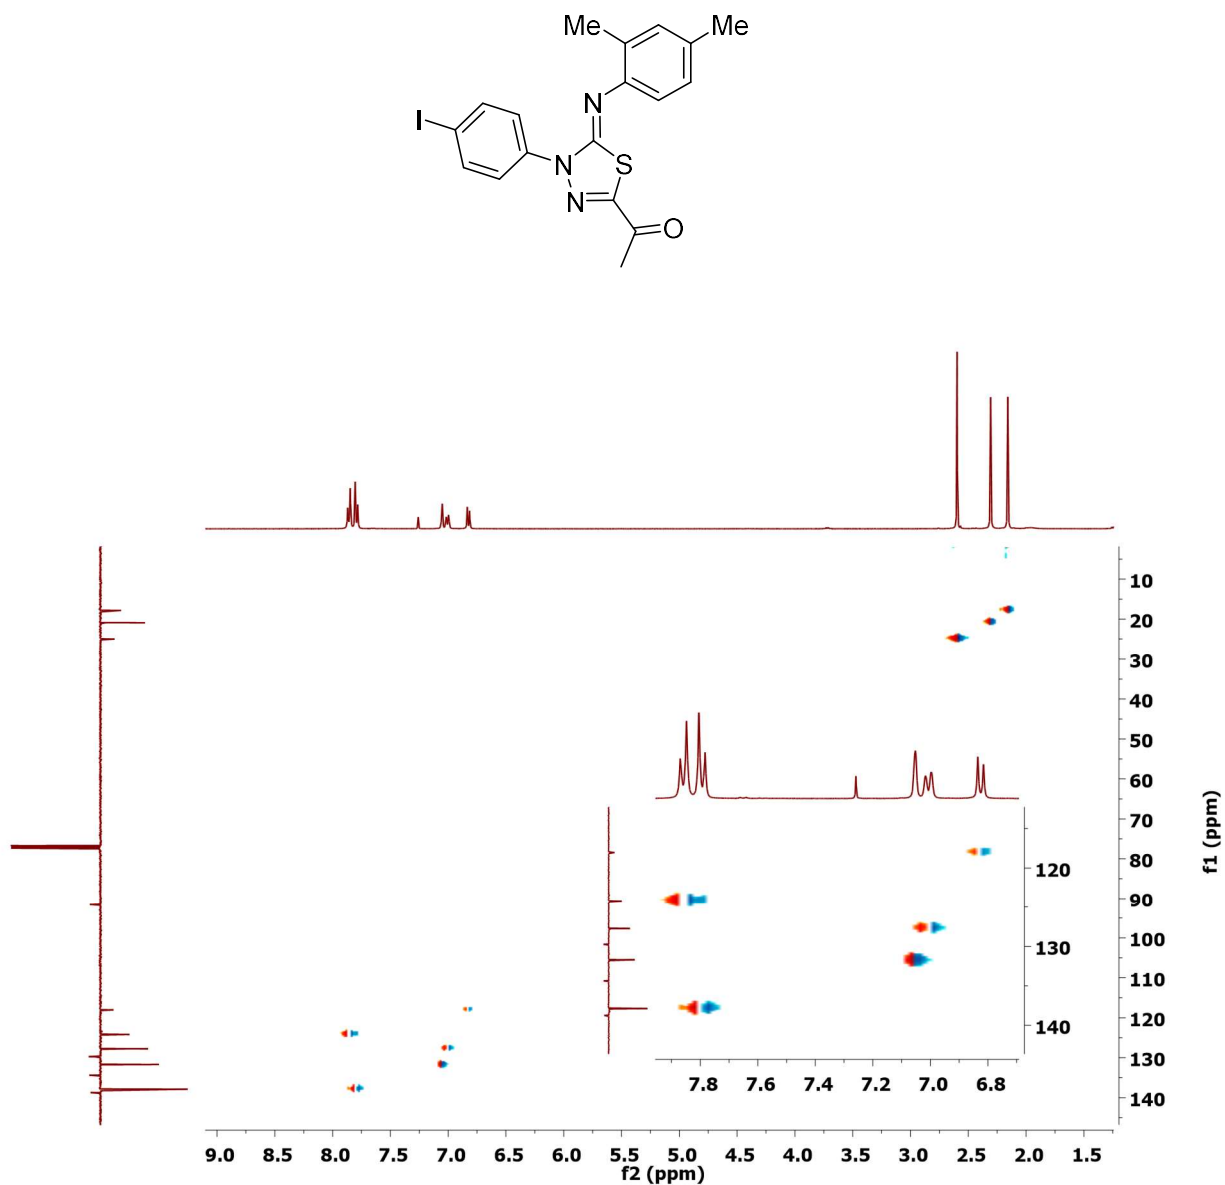



$^1\text{H}$ - $^{13}\text{C}$ -gHMBC NMR ( $\text{CDCl}_3$ ) spectrum of (Z)-1-(5-((2,4-dimethylphenyl)imino)-4-(4-iodophenyl)-4,5-dihydro-1,3,4-thiadiazol-2-yl)ethan-1-one

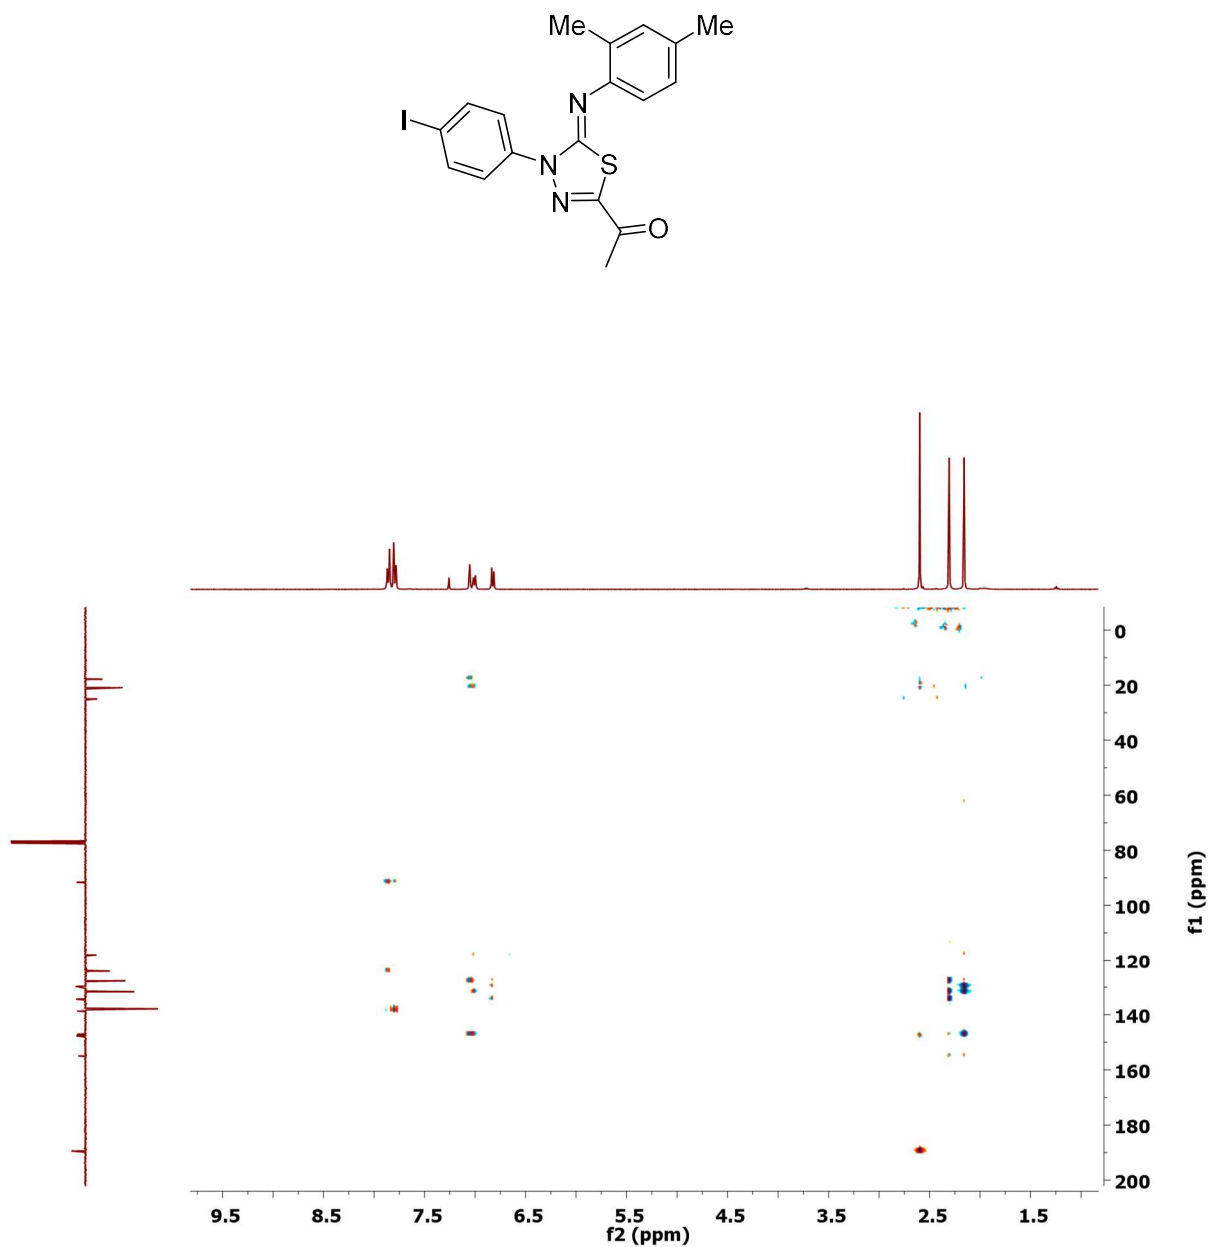

$^1\text{H}$  NMR ( $\text{CDCl}_3$ ) spectrum of (Z)-1-(3-(((5-acetyl-3-(4-bromophenyl)-1,3,4-thiadiazol-2(3H)-ylidene)amino)phenyl)ethan-1-one

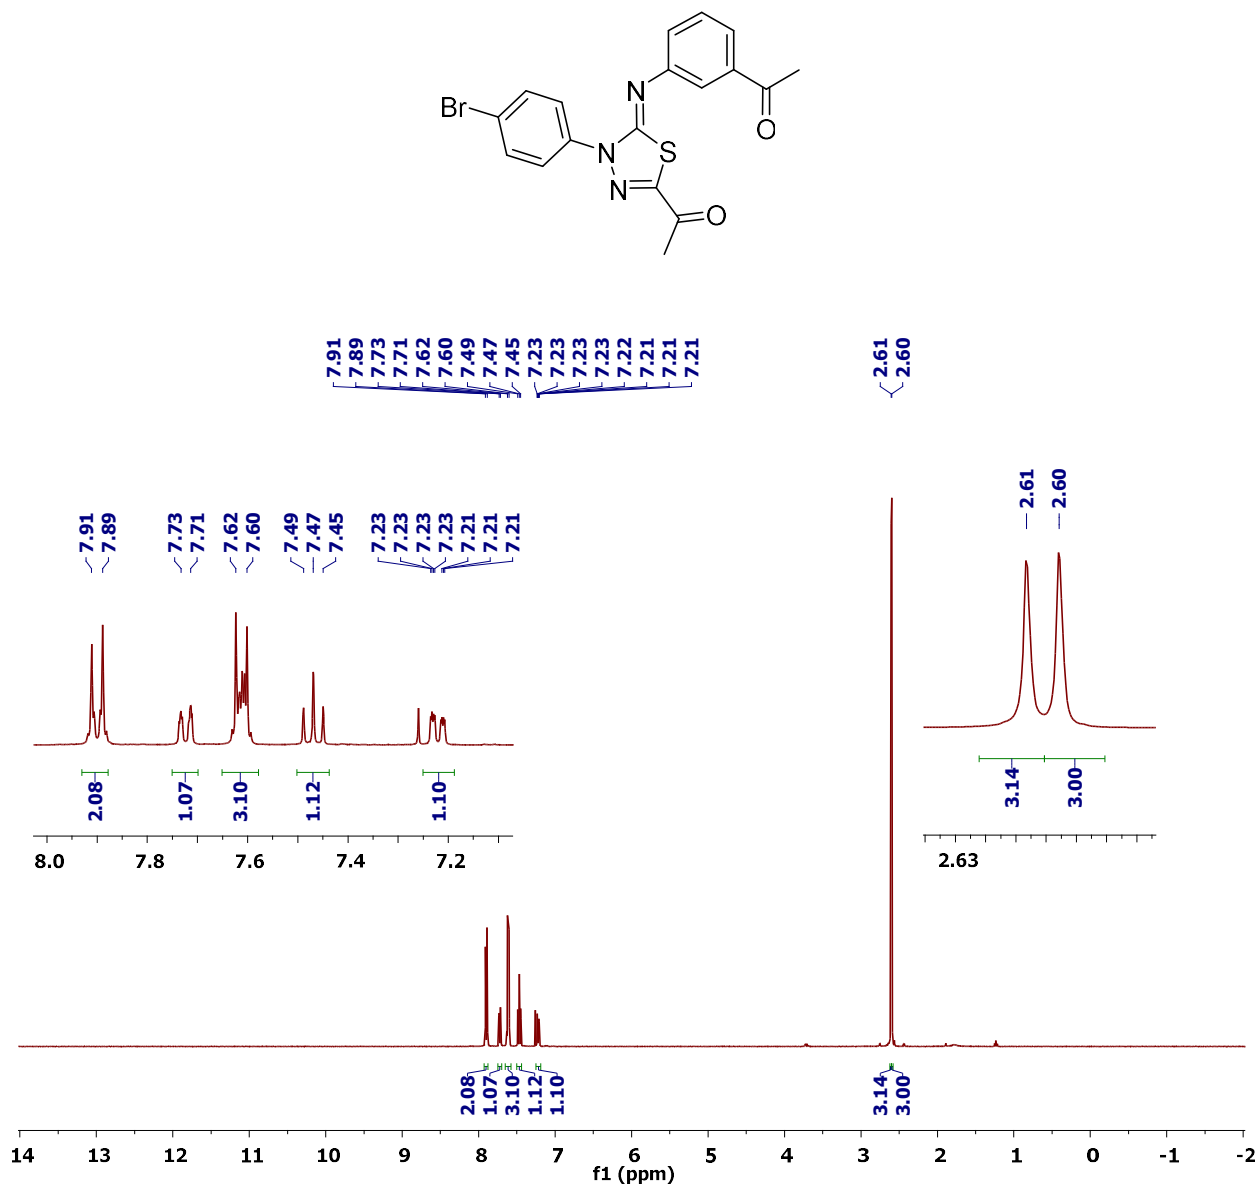

$^{13}\text{C}$  NMR ( $\text{CDCl}_3$ ) spectrum of (Z)-1-(3-((5-acetyl-3-(4-bromophenyl)-1,3,4-thiadiazol-2(3H)-ylidene)amino)phenyl)ethan-1-one

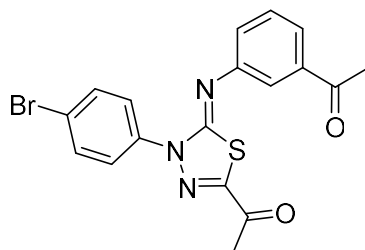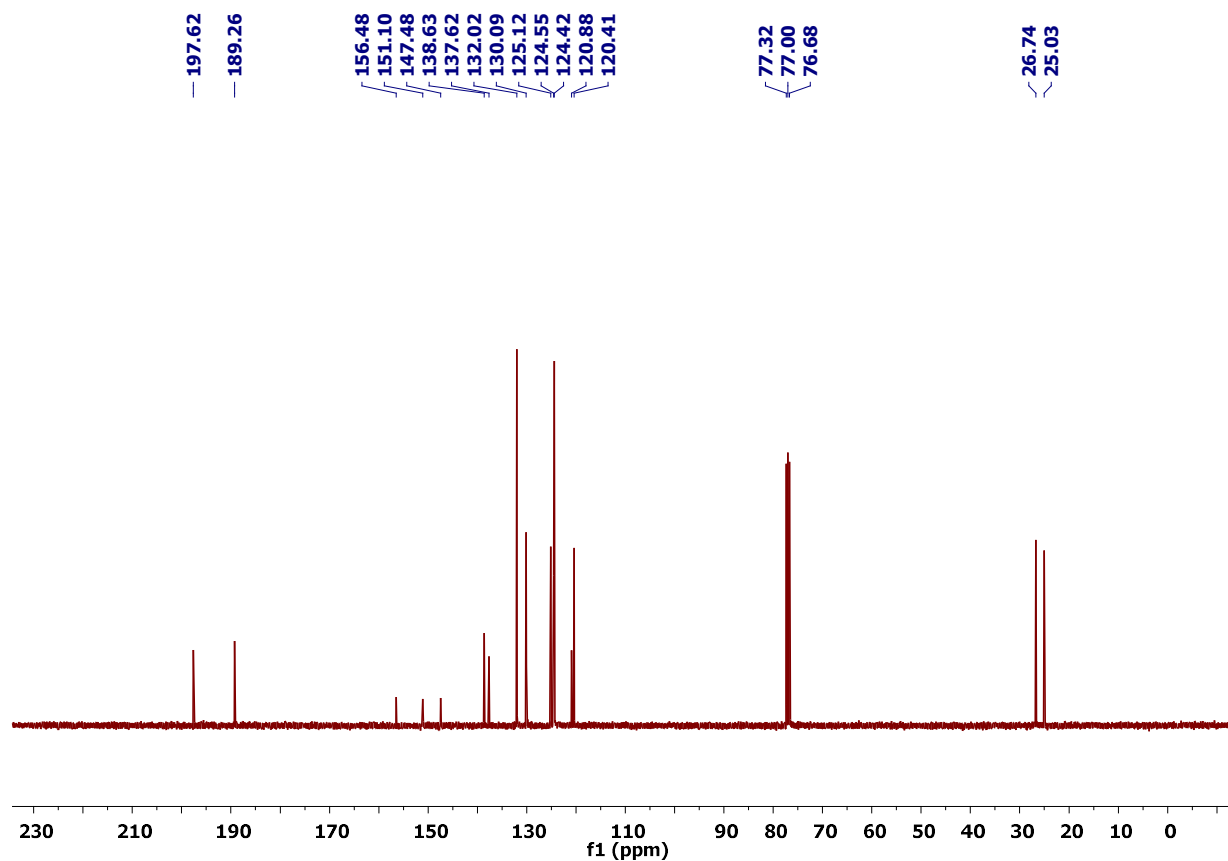

$^{13}\text{C}$  CRAPT NMR ( $\text{CDCl}_3$ ) spectrum of (Z)-1-(3-((5-acetyl-3-(4-bromophenyl)-1,3,4-thiadiazol-2(3H)-ylidene)amino)phenyl)ethan-1-one

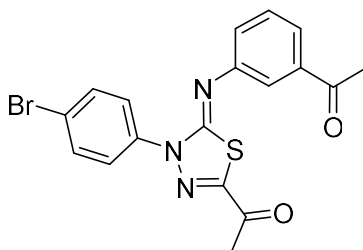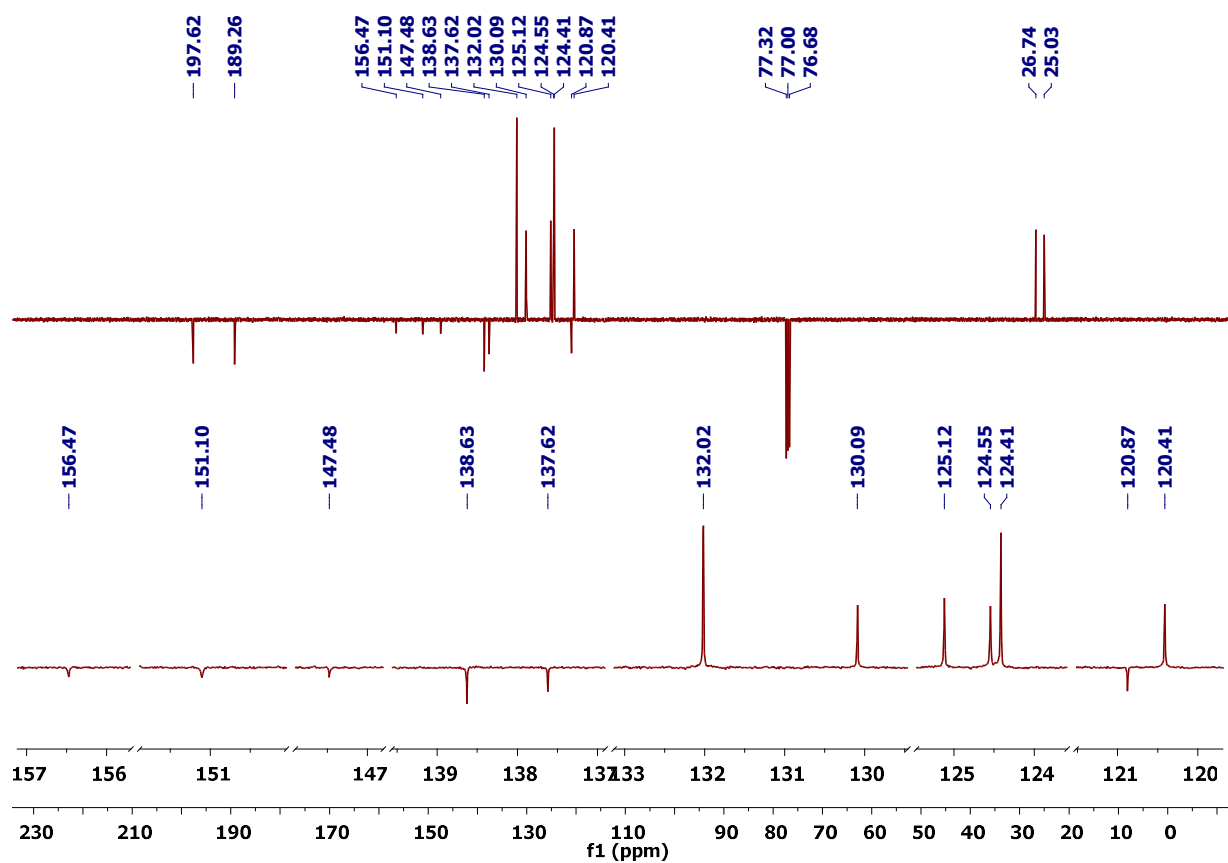

$^1\text{H}$ - $^1\text{H}$  gDQCOSY NMR ( $\text{CDCl}_3$ ) spectrum of (Z)-1-(3-((5-acetyl-3-(4-bromophenyl)-1,3,4-thiadiazol-2(3H)-ylidene)amino)phenyl)ethan-1-one

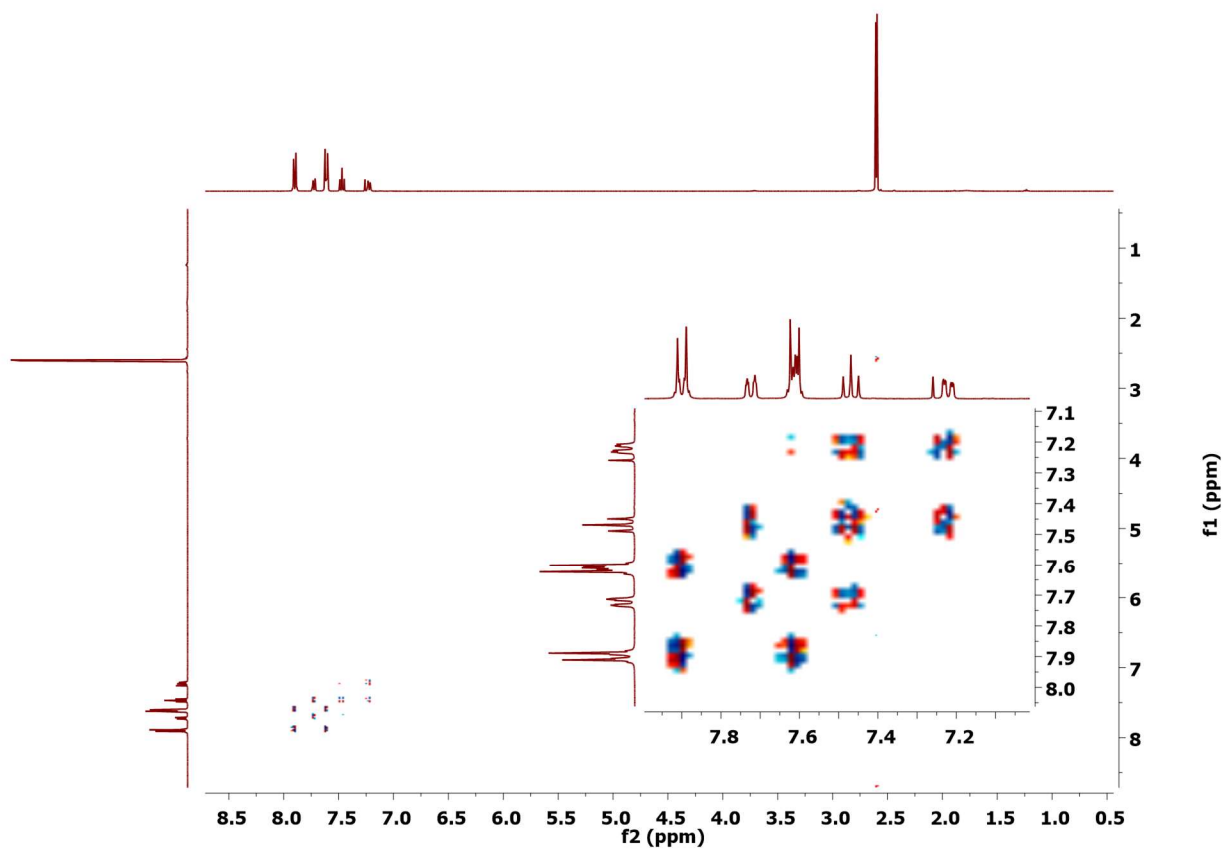

$^1\text{H}$ - $^{13}\text{C}$ -HSQC NMR ( $\text{CDCl}_3$ ) spectrum of (Z)-1-(3-((5-acetyl-3-(4-bromophenyl)-1,3,4-thiadiazol-2(3H)-ylidene)amino)phenyl)ethan-1-one

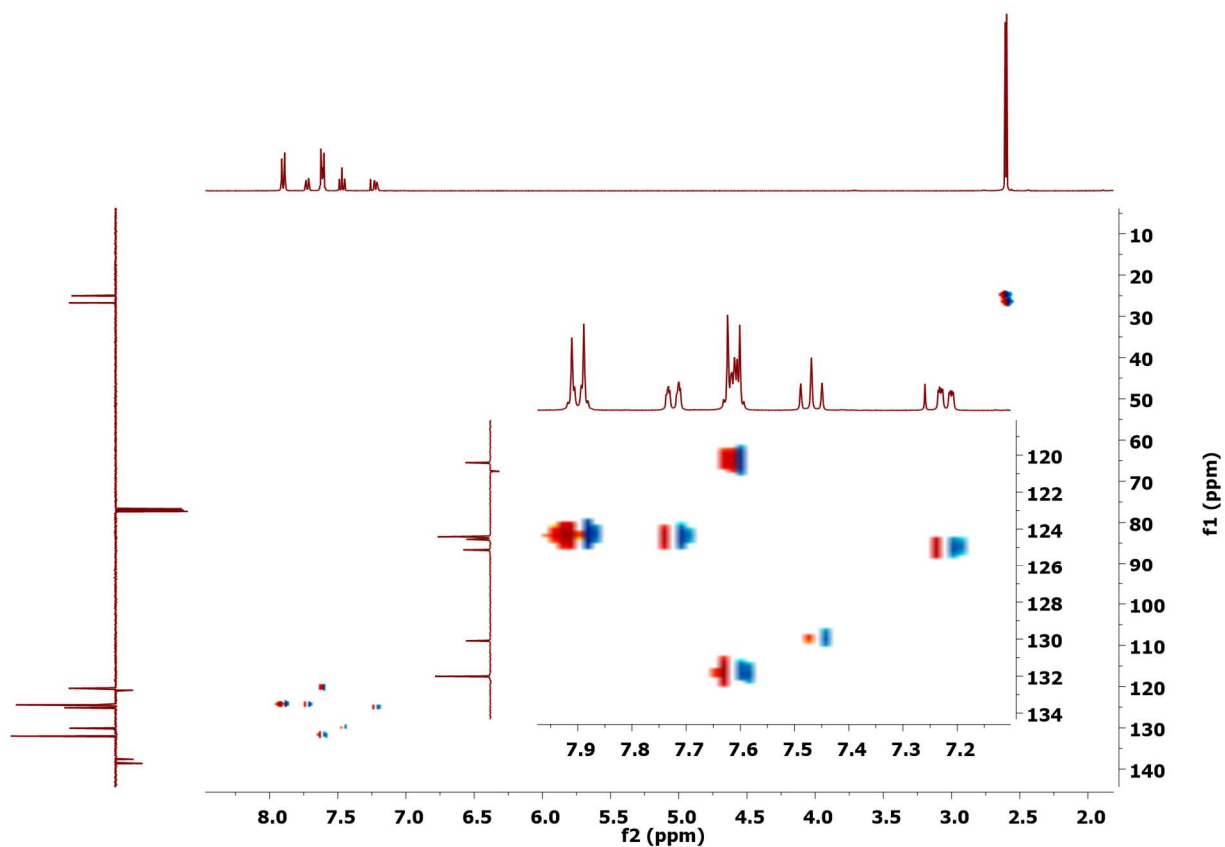

$^1\text{H}$ - $^{13}\text{C}$ -gHMBC NMR ( $\text{CDCl}_3$ ) spectrum of (Z)-1-(3-((5-acetyl-3-(4-bromophenyl)-1,3,4-thiadiazol-2(3H)-ylidene)amino)phenyl)ethan-1-one

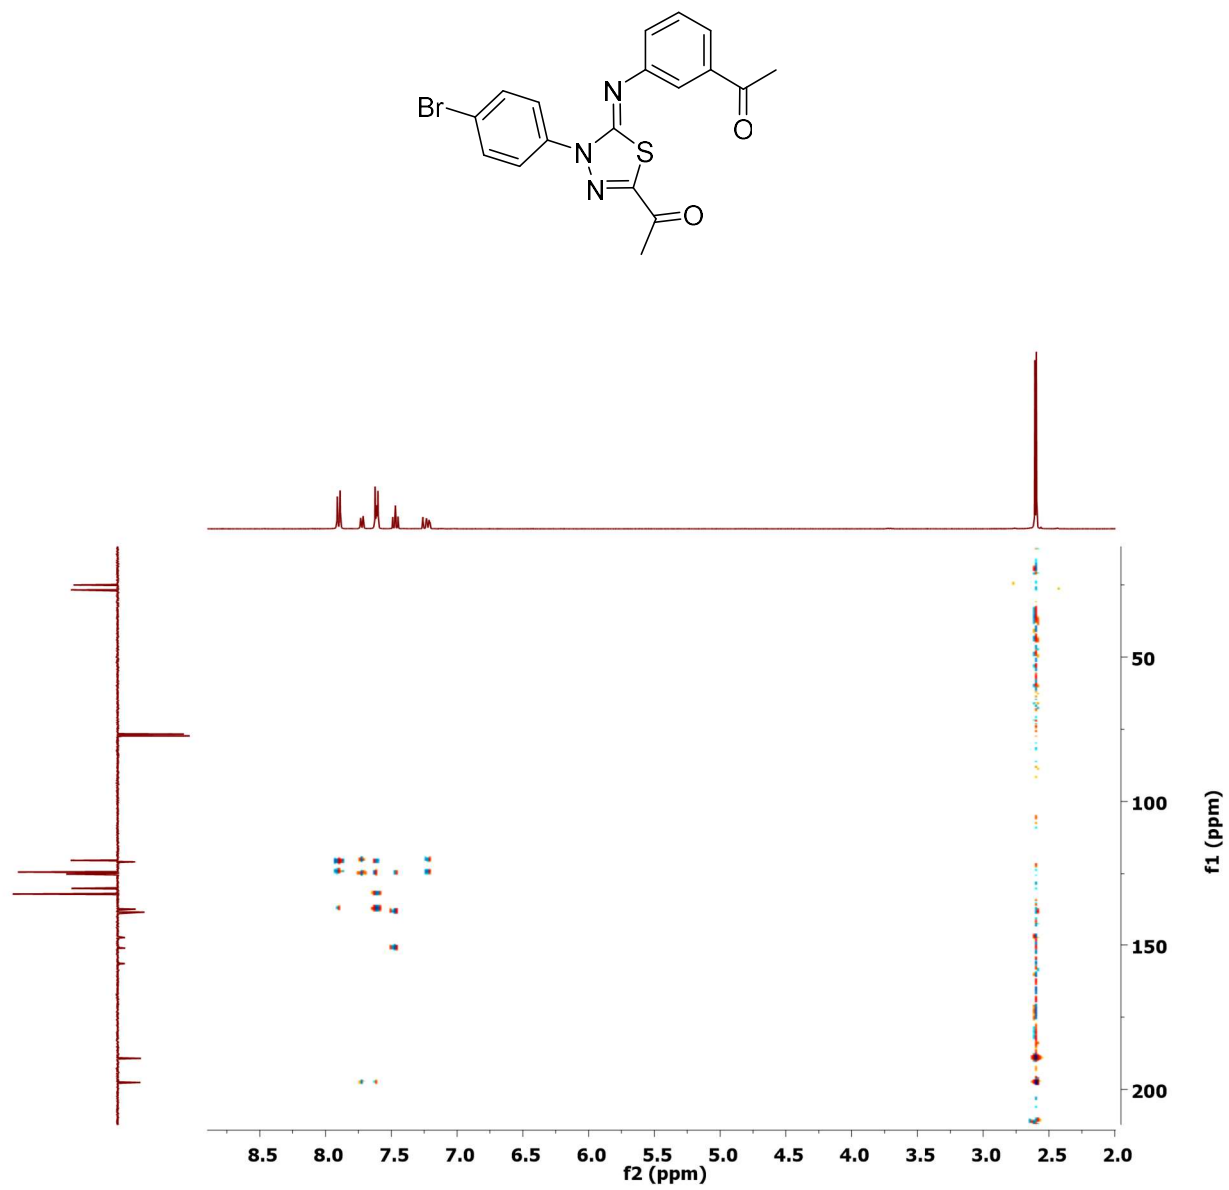

$^1\text{H}$  NMR ( $\text{CDCl}_3$ ) spectrum of (Z)-1-(5-((2,4-dichlorophenyl)imino)-4-(4-iodophenyl)-4,5-dihydro-1,3,4-thiadiazol-2-yl)ethan-1-one

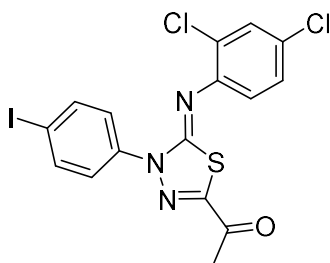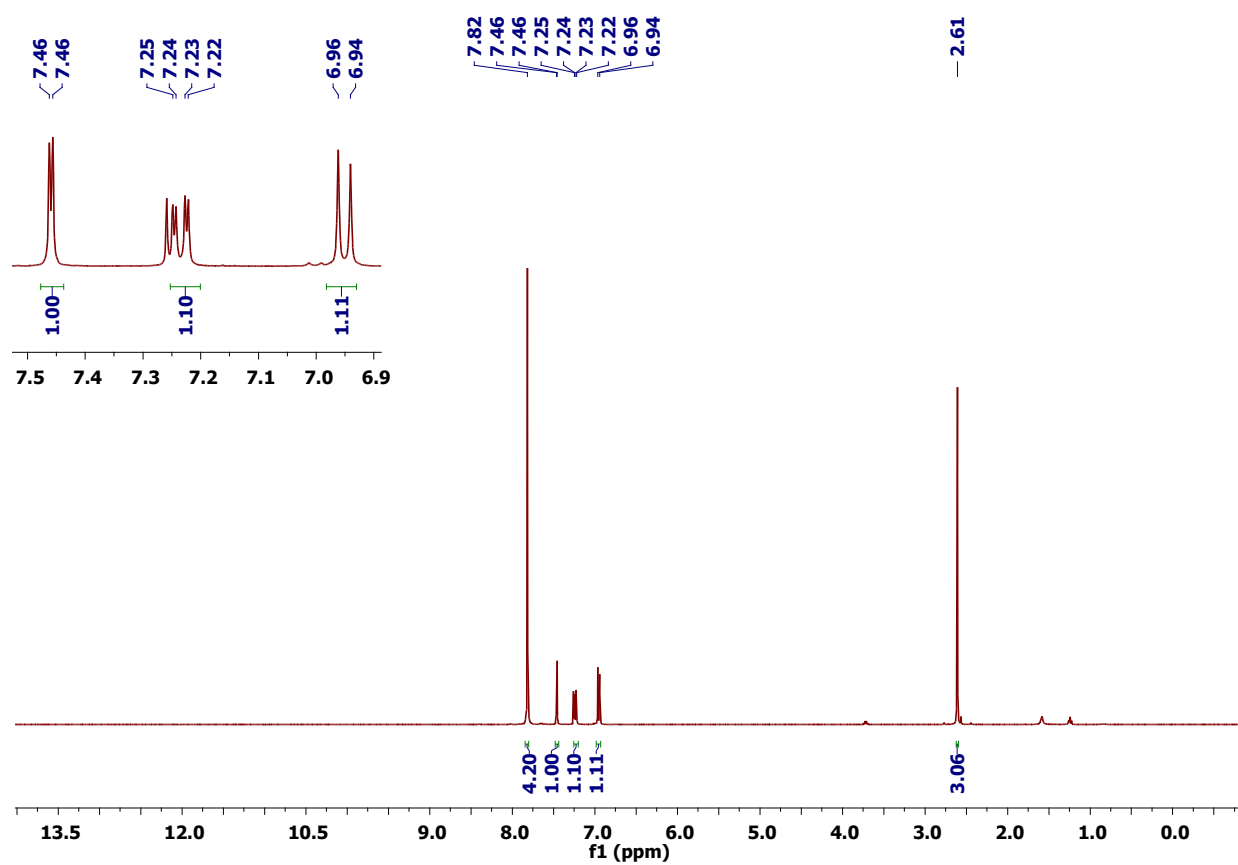



$^{13}\text{C}$  NMR ( $\text{CDCl}_3$ ) spectrum of (Z)-1-(5-((2,4-dichlorophenyl)imino)-4-(4-iodophenyl)-4,5-dihydro-1,3,4-thiadiazol-2-yl)ethan-1-one

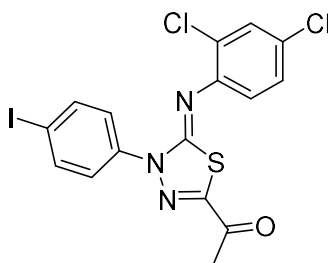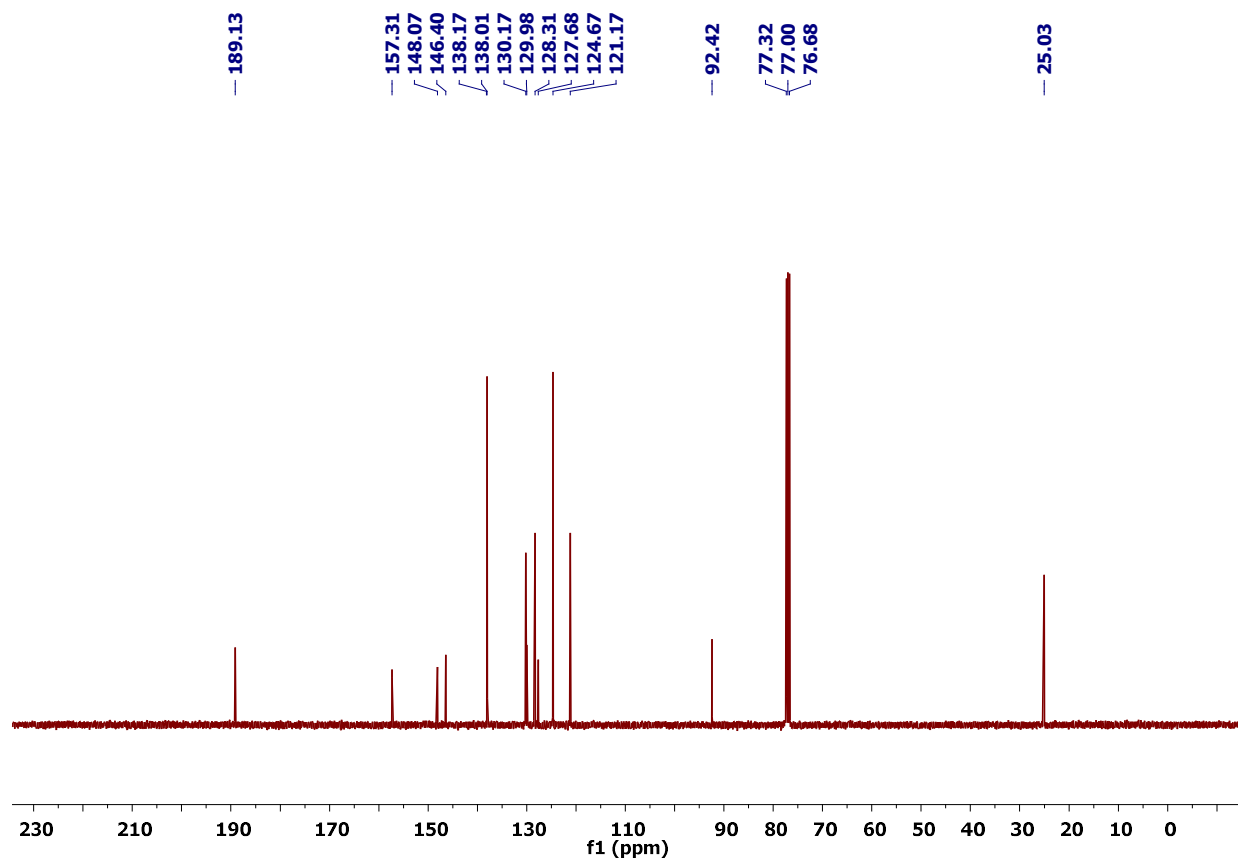

$^{13}\text{C}$  CRAPT NMR ( $\text{CDCl}_3$ ) spectrum of (Z)-1-(5-((2,4-dichlorophenyl)imino)-4-(4-iodophenyl)-4,5-dihydro-1,3,4-thiadiazol-2-yl)ethan-1-one

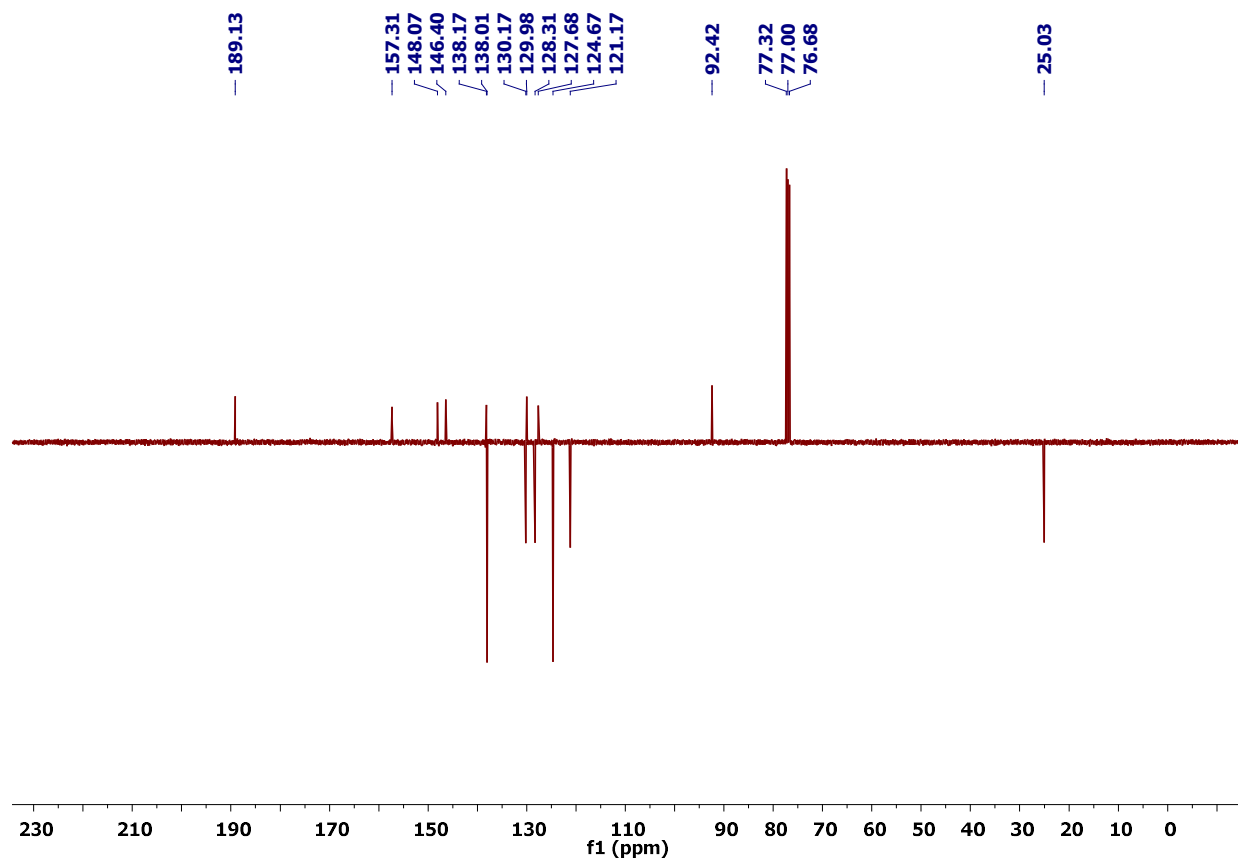

$^1\text{H}$ - $^1\text{H}$  gDQCOSY NMR ( $\text{CDCl}_3$ ) spectrum of (Z)-1-(5-((2,4-dichlorophenyl)imino)-4-(4-iodophenyl)-4,5-dihydro-1,3,4-thiadiazol-2-yl)ethan-1-one

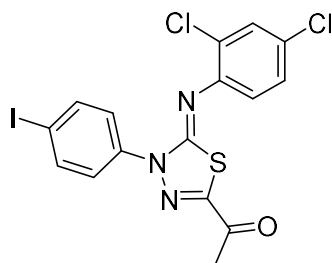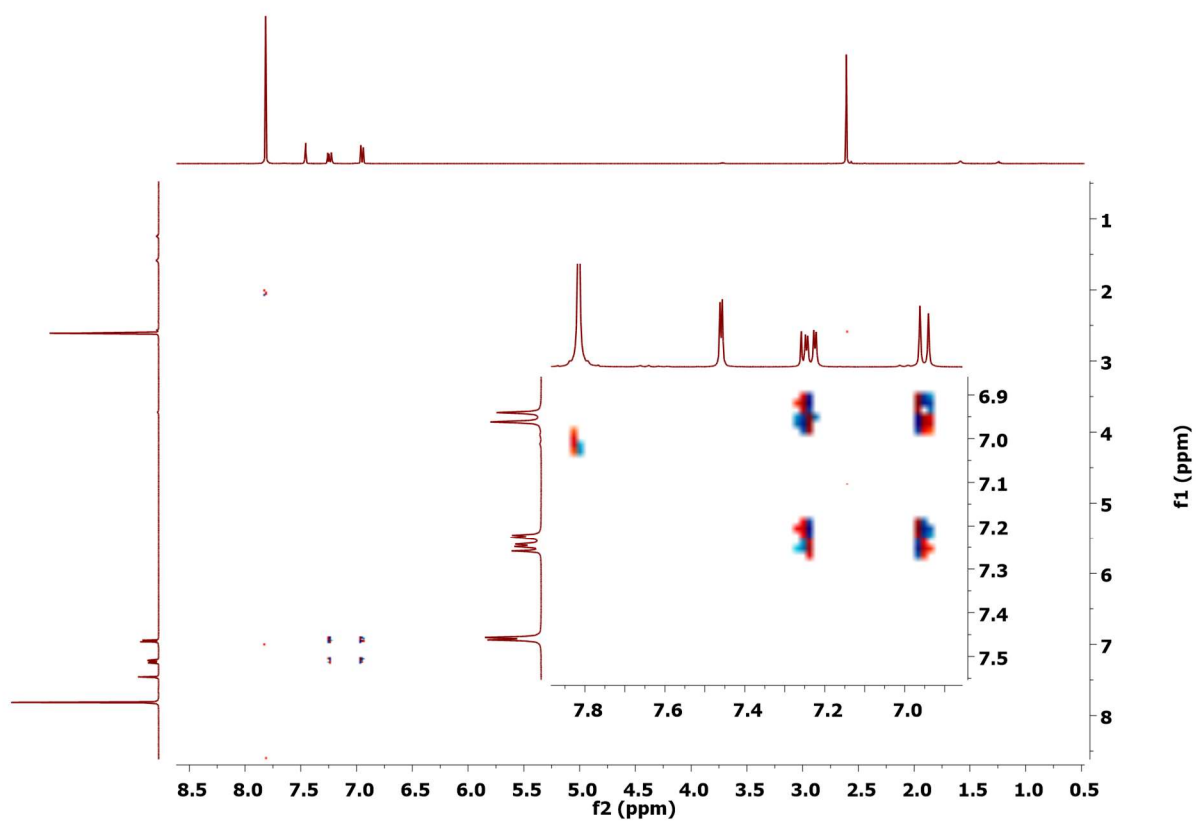

$^1\text{H}$ - $^{13}\text{C}$ -HSQC NMR ( $\text{CDCl}_3$ ) spectrum of (Z)-1-(5-((2,4-dichlorophenyl)imino)-4-(4-iodophenyl)-4,5-dihydro-1,3,4-thiadiazol-2-yl)ethan-1-one

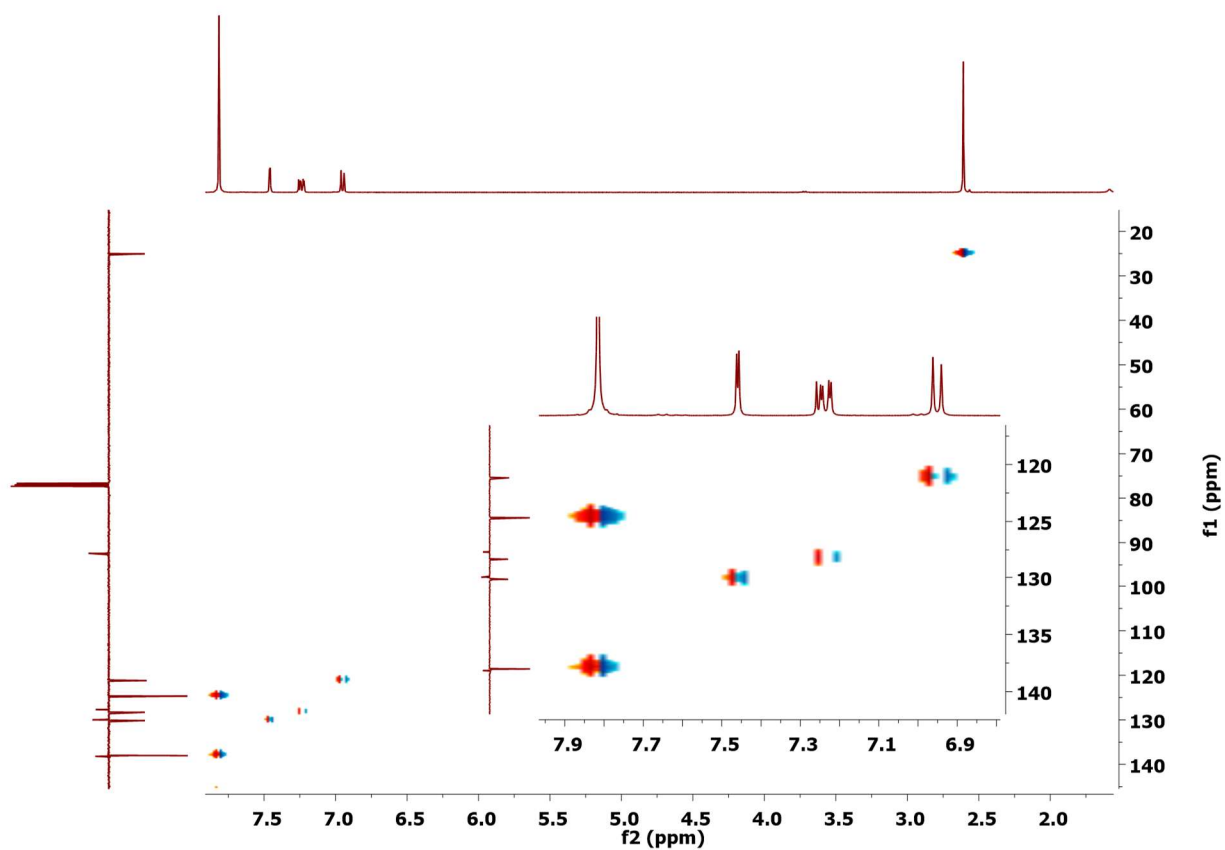

$^1\text{H}$ - $^{13}\text{C}$ -gHMBC NMR ( $\text{CDCl}_3$ ) spectrum of (Z)-1-(5-((2,4-dichlorophenyl)imino)-4-(4-iodophenyl)-4,5-dihydro-1,3,4-thiadiazol-2-yl)ethan-1-one

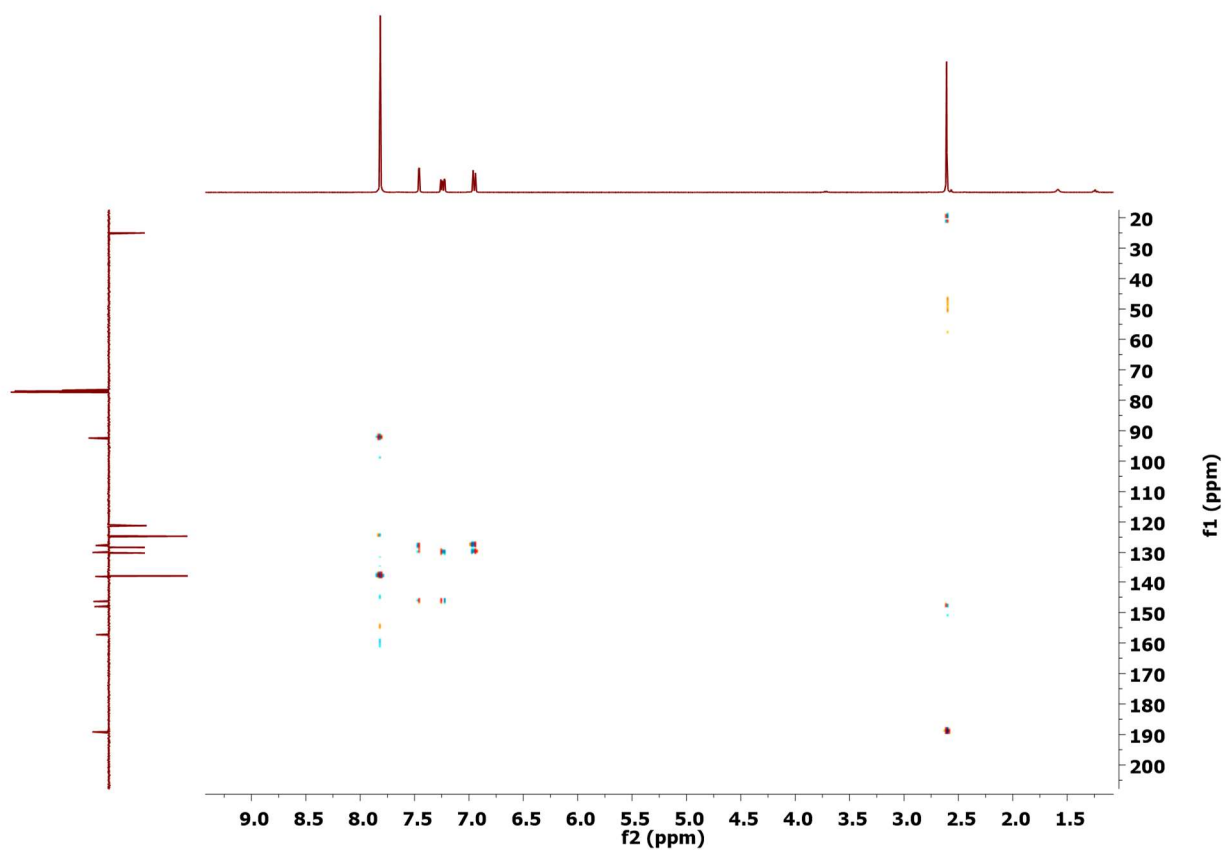

$^1\text{H}$  NMR ( $\text{CDCl}_3$ ) spectrum of (Z)-1-(4-(4-chloro-2-methylphenyl)-5-((2,4-dimethylphenyl)imino)-4,5-dihydro-1,3,4-thiadiazol-2-yl)ethan-1-one

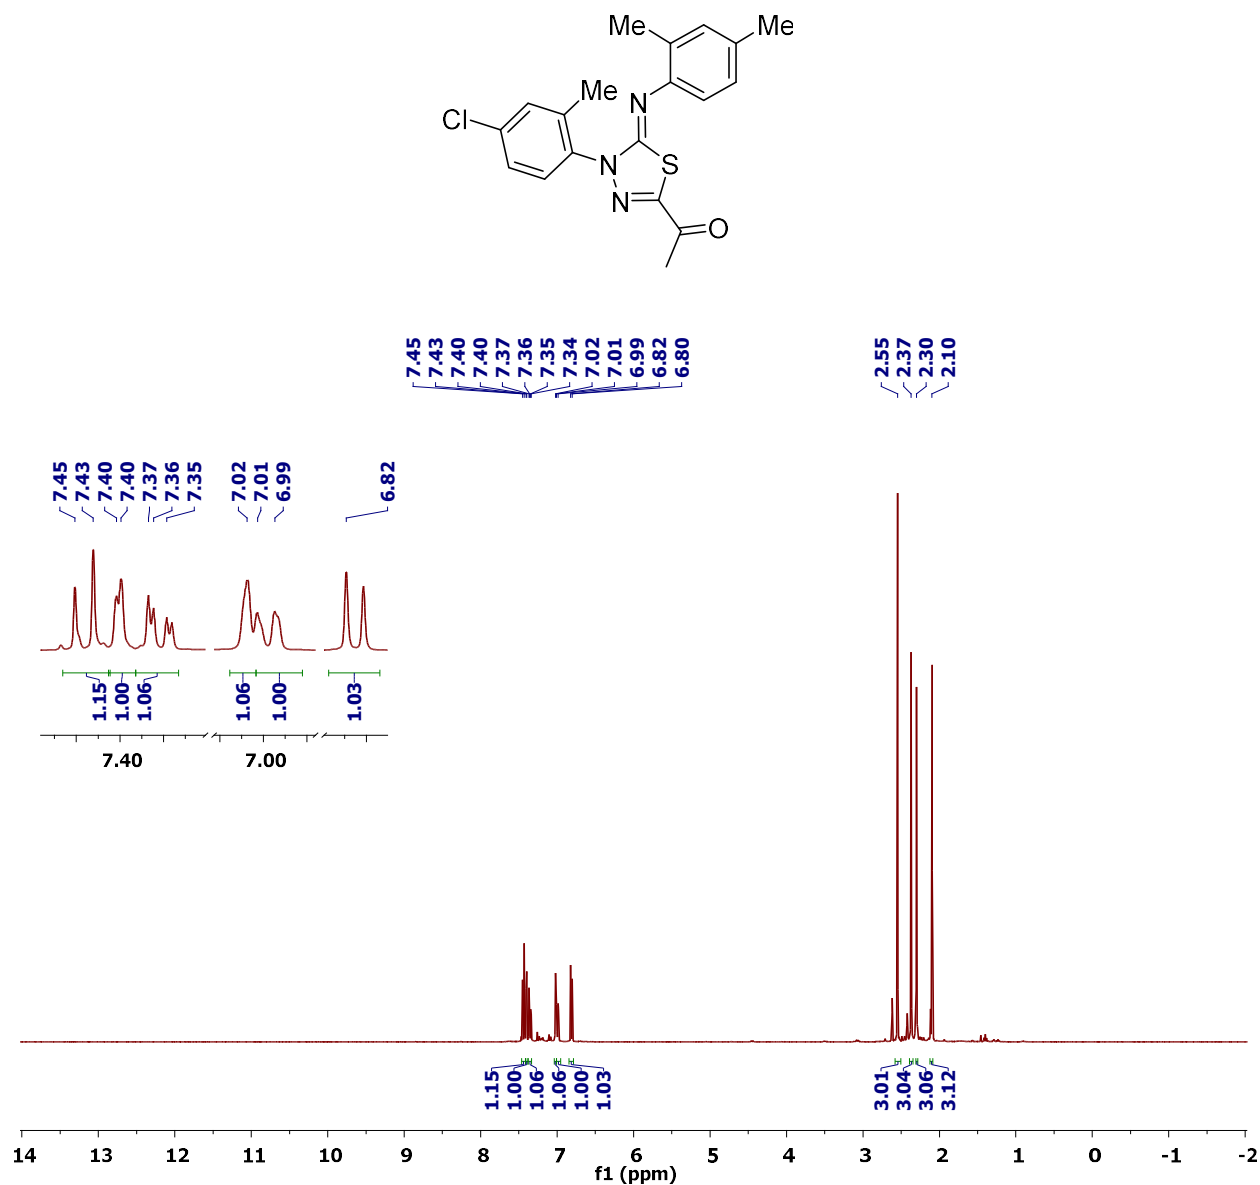

$^{13}\text{C}$  NMR ( $\text{CDCl}_3$ ) spectrum of (Z)-1-(4-(4-chloro-2-methylphenyl)-5-((2,4-dimethylphenyl)imino)-4,5-dihydro-1,3,4-thiadiazol-2-yl)ethan-1-one

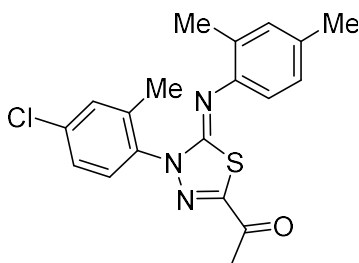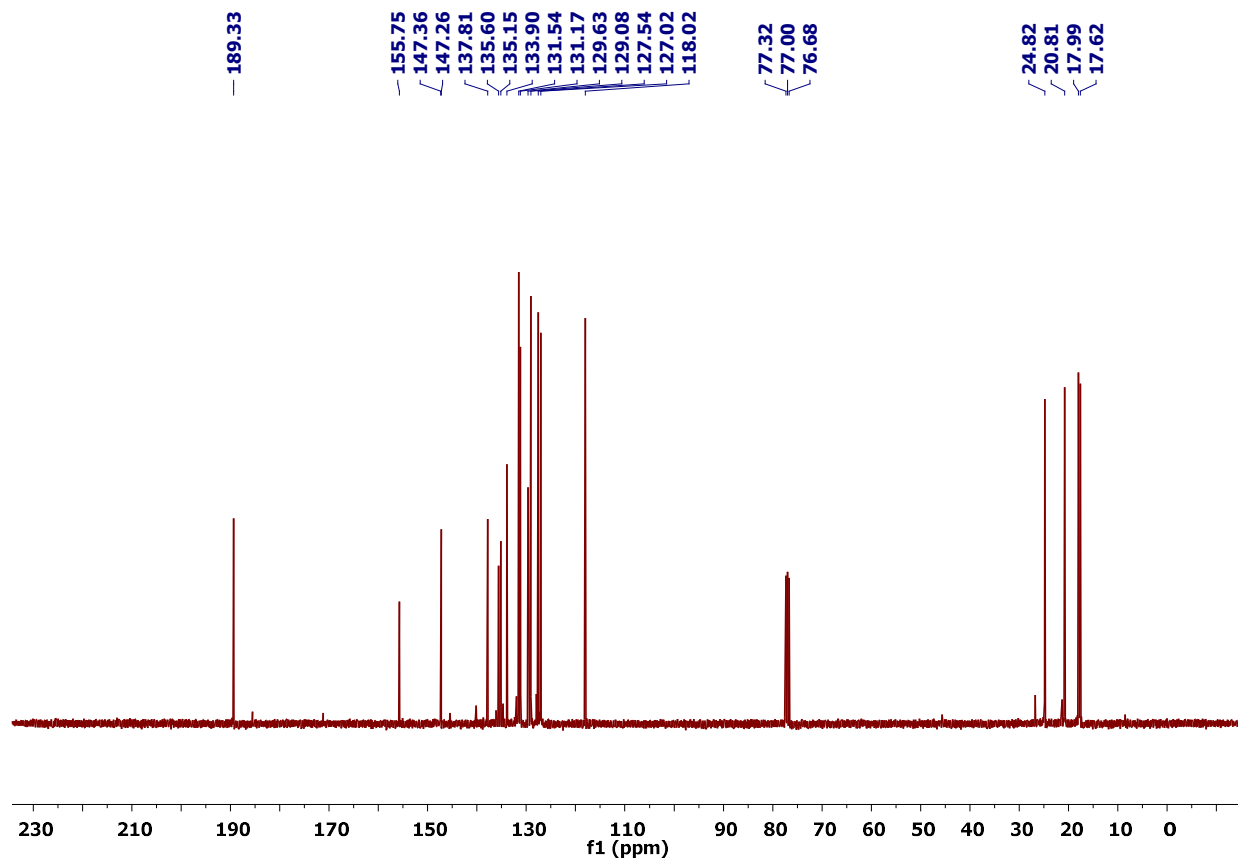

$^{13}\text{C}$  CRAPT NMR ( $\text{CDCl}_3$ ) spectrum of (Z)-1-(4-(4-chloro-2-methylphenyl)-5-((2,4-dimethylphenyl)imino)-4,5-dihydro-1,3,4-thiadiazol-2-yl)ethan-1-one

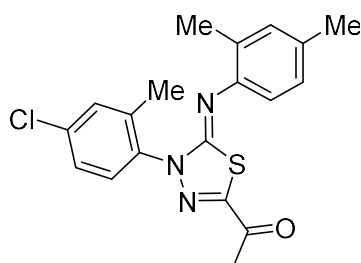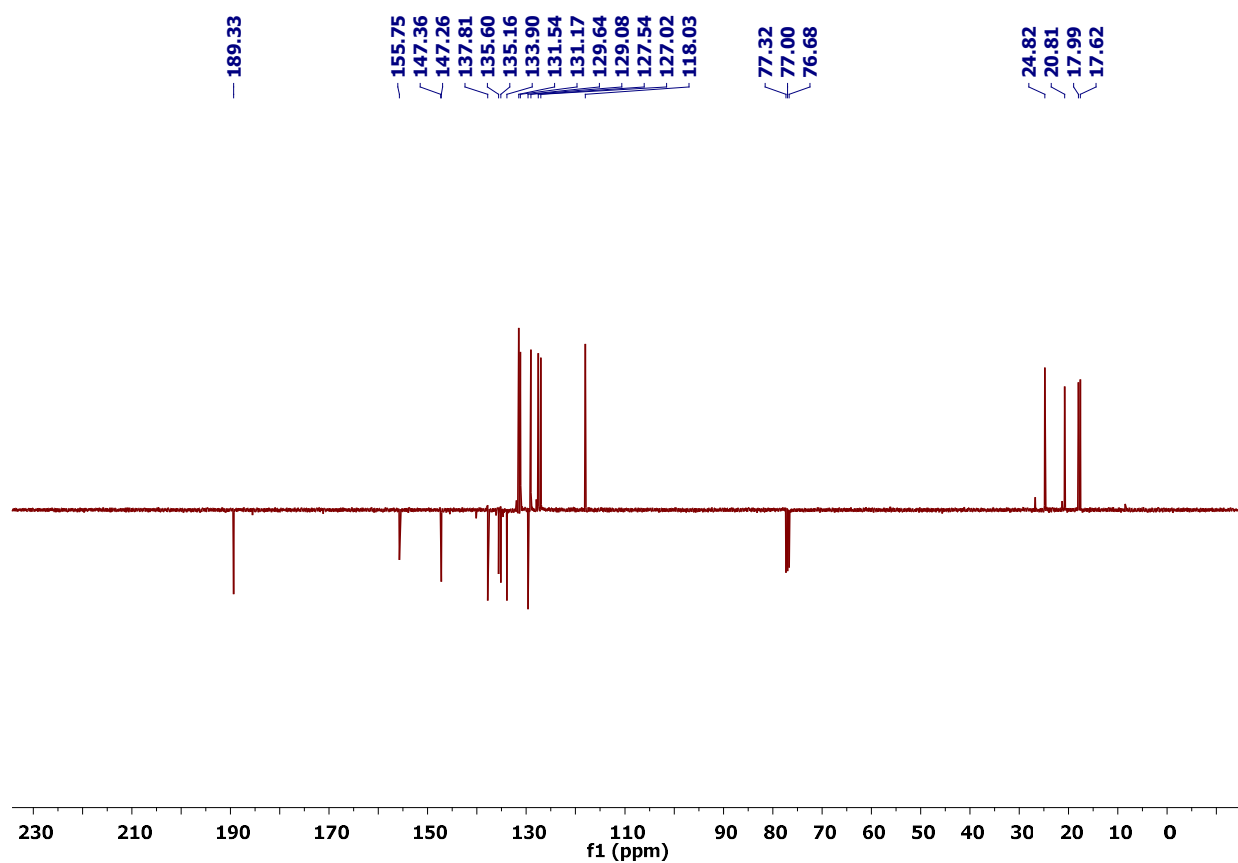



$^1\text{H}$ - $^1\text{H}$  gDQCOSY NMR ( $\text{CDCl}_3$ ) spectrum of (Z)-1-(4-(4-chloro-2-methylphenyl)-5-((2,4-dimethylphenyl)imino)-4,5-dihydro-1,3,4-thiadiazol-2-yl)ethan-1-one

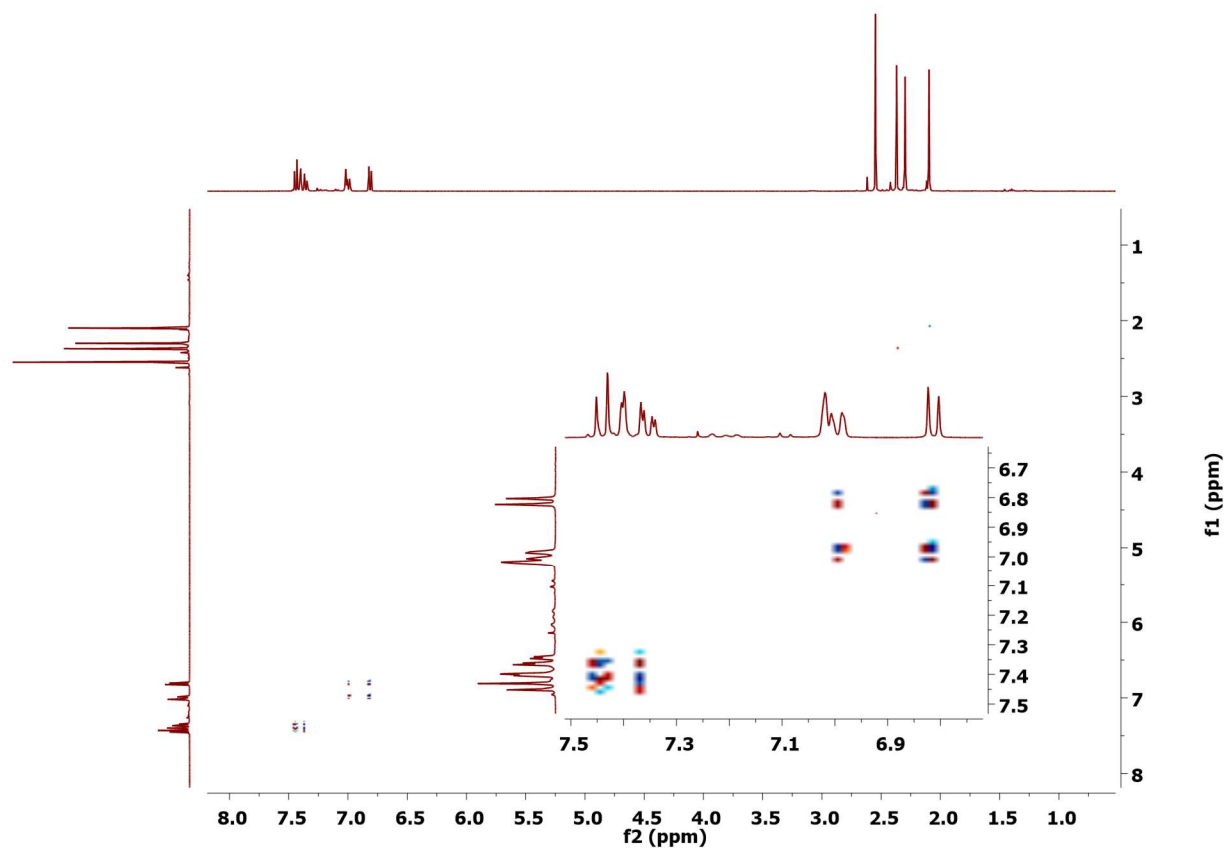

$^1\text{H}$ - $^{13}\text{C}$ -HSQC NMR ( $\text{CDCl}_3$ ) spectrum of (Z)-1-(4-(4-chloro-2-methylphenyl)-5-((2,4-dimethylphenyl)imino)-4,5-dihydro-1,3,4-thiadiazol-2-yl)ethan-1-one

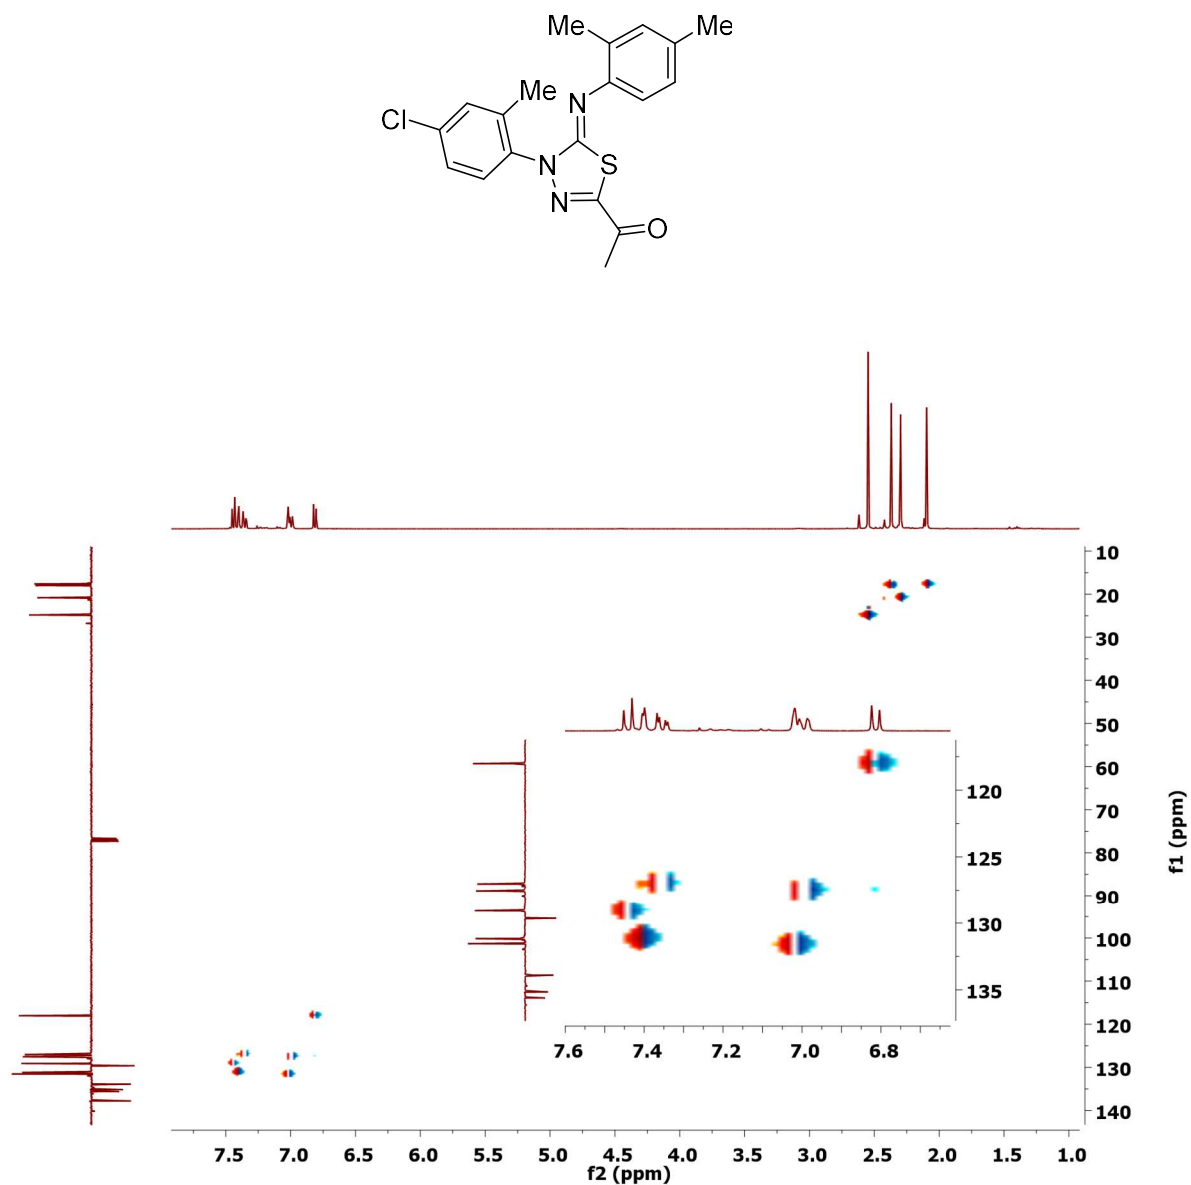

$^1\text{H}$ - $^{13}\text{C}$ -gHMBC NMR ( $\text{CDCl}_3$ ) spectrum of (Z)-1-(4-(4-chloro-2-methylphenyl)-5-((2,4-dimethylphenyl)imino)-4,5-dihydro-1,3,4-thiadiazol-2-yl)ethan-1-one

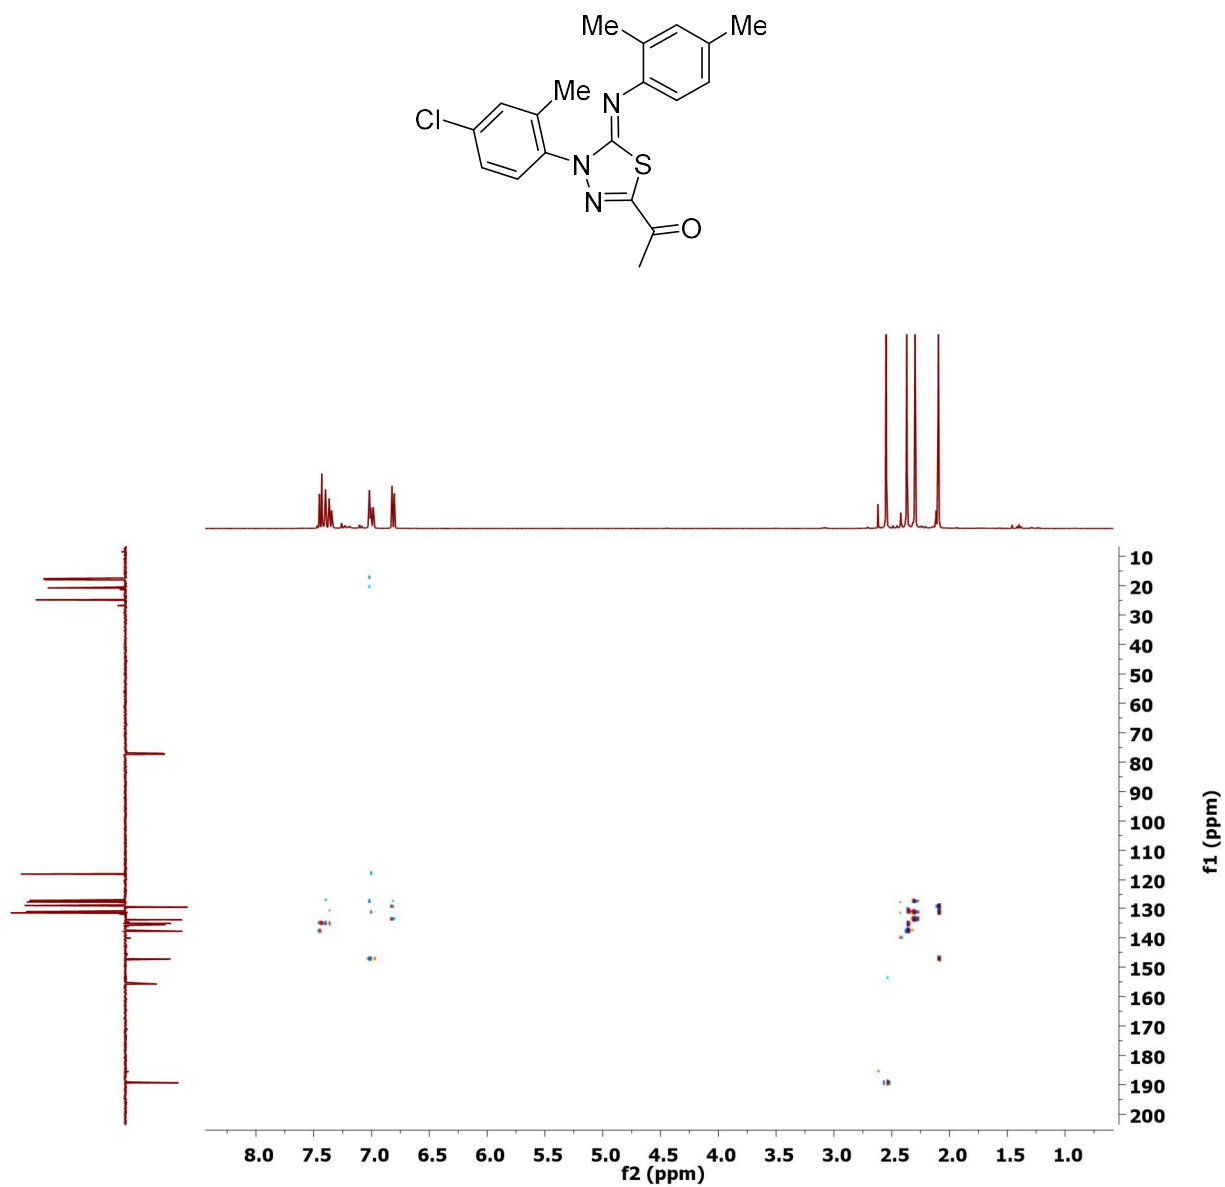

$^1\text{H}$  NMR ( $\text{CDCl}_3$ ) spectrum of (Z)-1-(4-(benzo[d][1,3]dioxol-5-yl)-5-((4-(benzyloxy)phenyl)imino)-4,5-dihydro-1,3,4-thiadiazol-2-yl)ethan-1-one

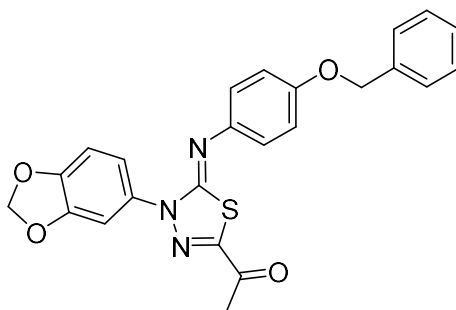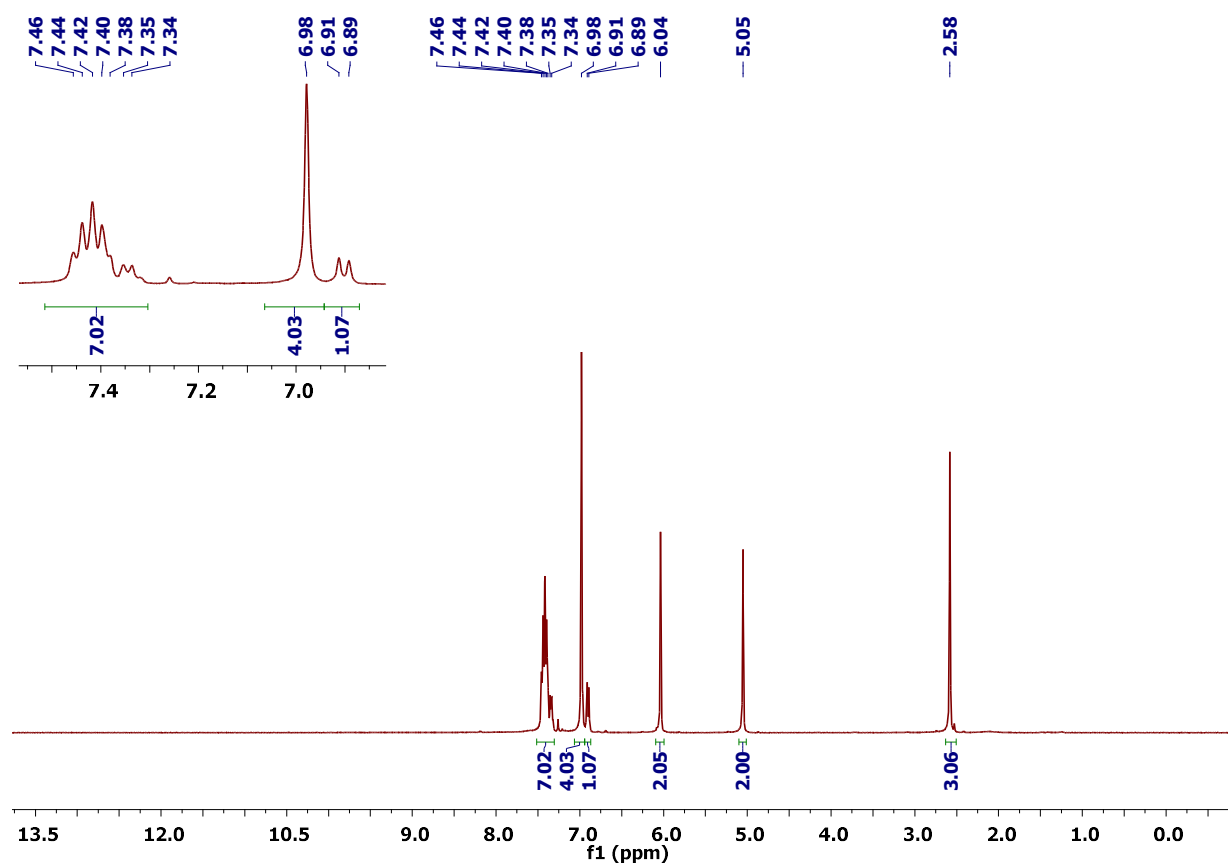

$^{13}\text{C}$  NMR ( $\text{CDCl}_3$ ) spectrum of (Z)-1-(4-(benzo[d][1,3]dioxol-5-yl)-5-((4-(benzyloxy)phenyl)imino)-4,5-dihydro-1,3,4-thiadiazol-2-yl)ethan-1-one

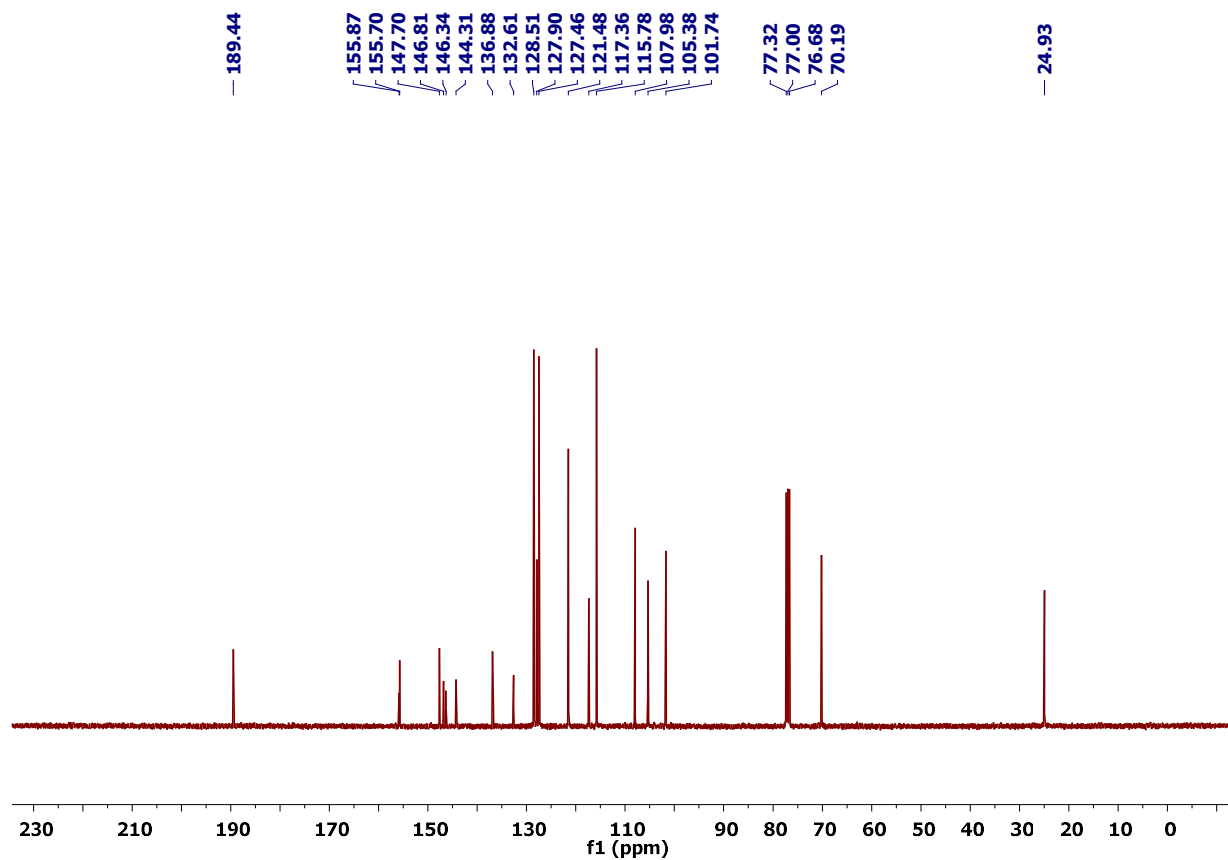

$^{13}\text{C}$  CRAPT NMR ( $\text{CDCl}_3$ ) spectrum of (Z)-1-(4-(benzo[d][1,3]dioxol-5-yl)-5-((4-(benzyloxy)phenyl)imino)-4,5-dihydro-1,3,4-thiadiazol-2-yl)ethan-1-one

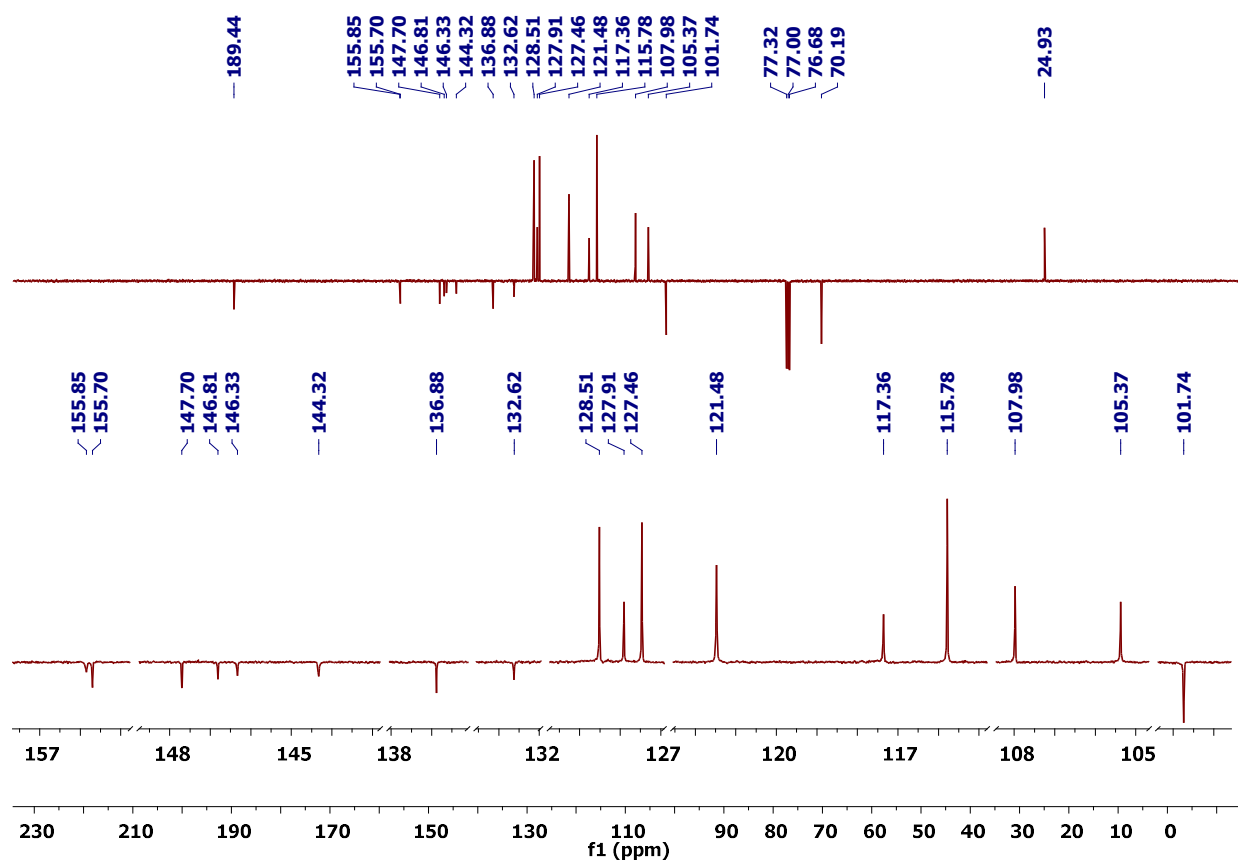

$^1\text{H}$ - $^1\text{H}$  gDQCOSY NMR ( $\text{CDCl}_3$ ) spectrum of (Z)-1-(4-(benzo[d][1,3]dioxol-5-yl)-5-((4-(benzyloxy)phenyl)imino)-4,5-dihydro-1,3,4-thiadiazol-2-yl)ethan-1-one

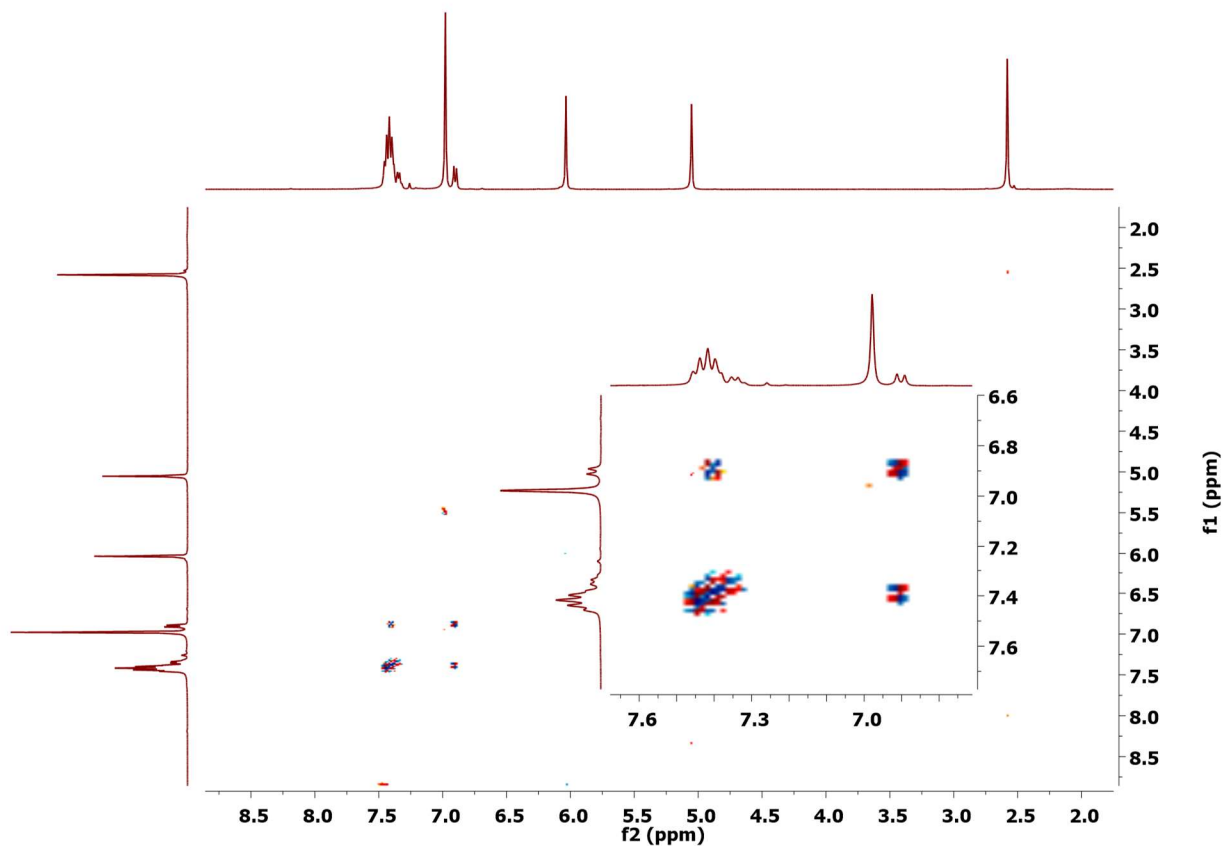

$^1\text{H}$ - $^{13}\text{C}$ -HSQC NMR ( $\text{CDCl}_3$ ) spectrum of (Z)-1-(4-(benzo[d][1,3]dioxol-5-yl)-5-((4-(benzyloxy)phenyl)imino)-4,5-dihydro-1,3,4-thiadiazol-2-yl)ethan-1-one

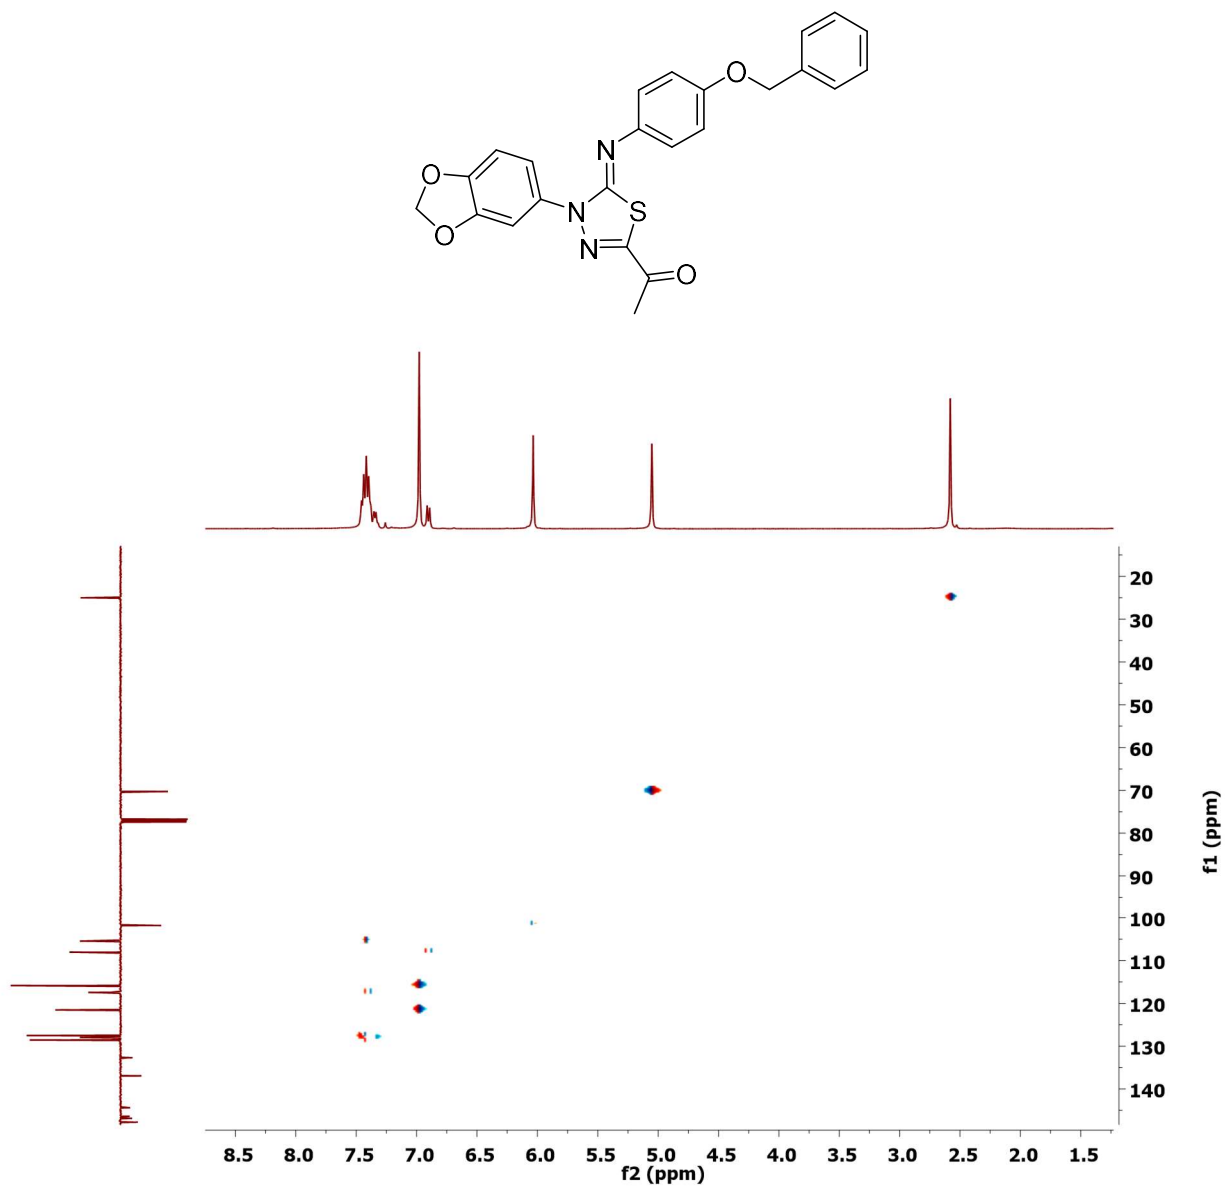



$^1\text{H}$ - $^{13}\text{C}$ -gHMBC NMR ( $\text{CDCl}_3$ ) spectrum of (Z)-1-(4-(benzo[d][1,3]dioxol-5-yl)-5-((4-(benzyloxy)phenyl)imino)-4,5-dihydro-1,3,4-thiadiazol-2-yl)ethan-1-one

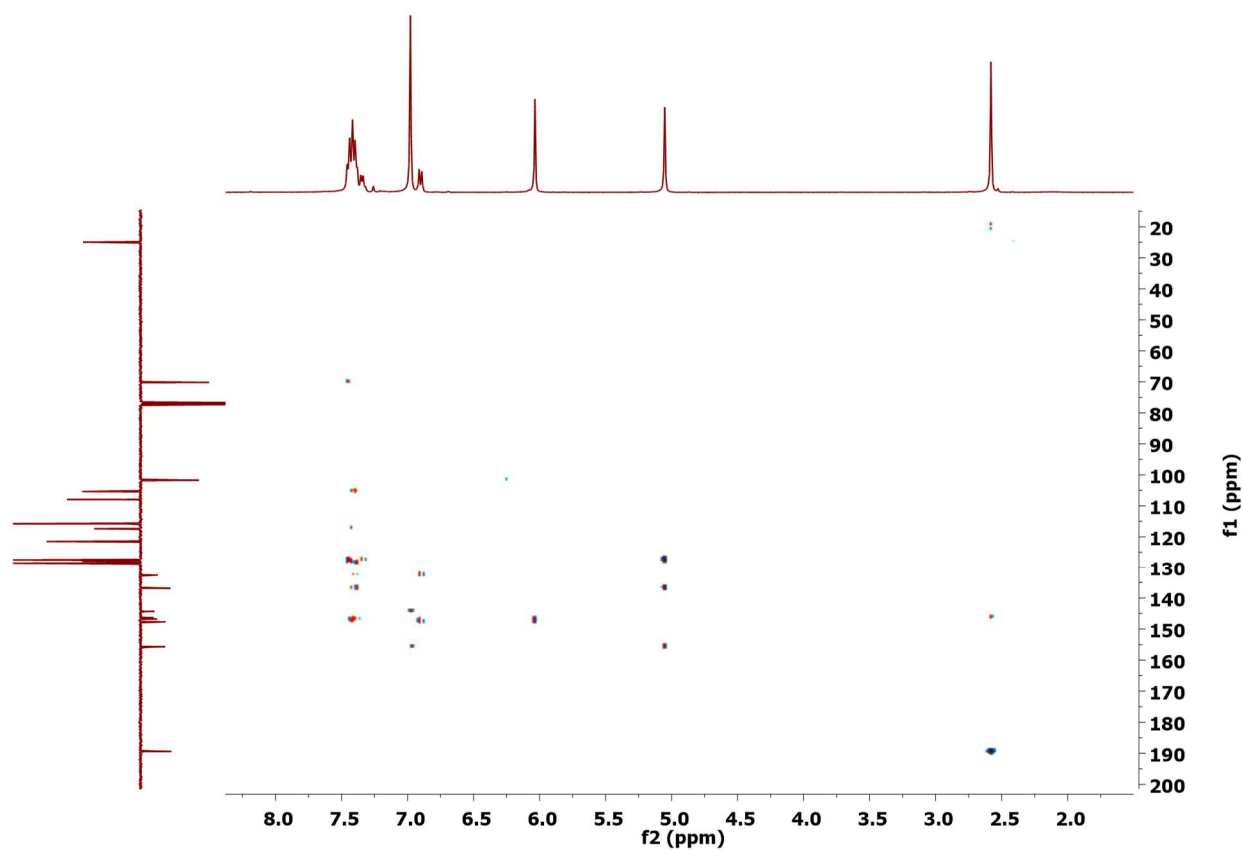

$^1\text{H}$  NMR ( $\text{CDCl}_3$ ) spectrum of (Z)-1-(4-(benzo[d][1,3]dioxol-5-yl)-5-((4-ethoxyphenyl)imino)-4,5-dihydro-1,3,4-thiadiazol-2-yl)ethan-1-one

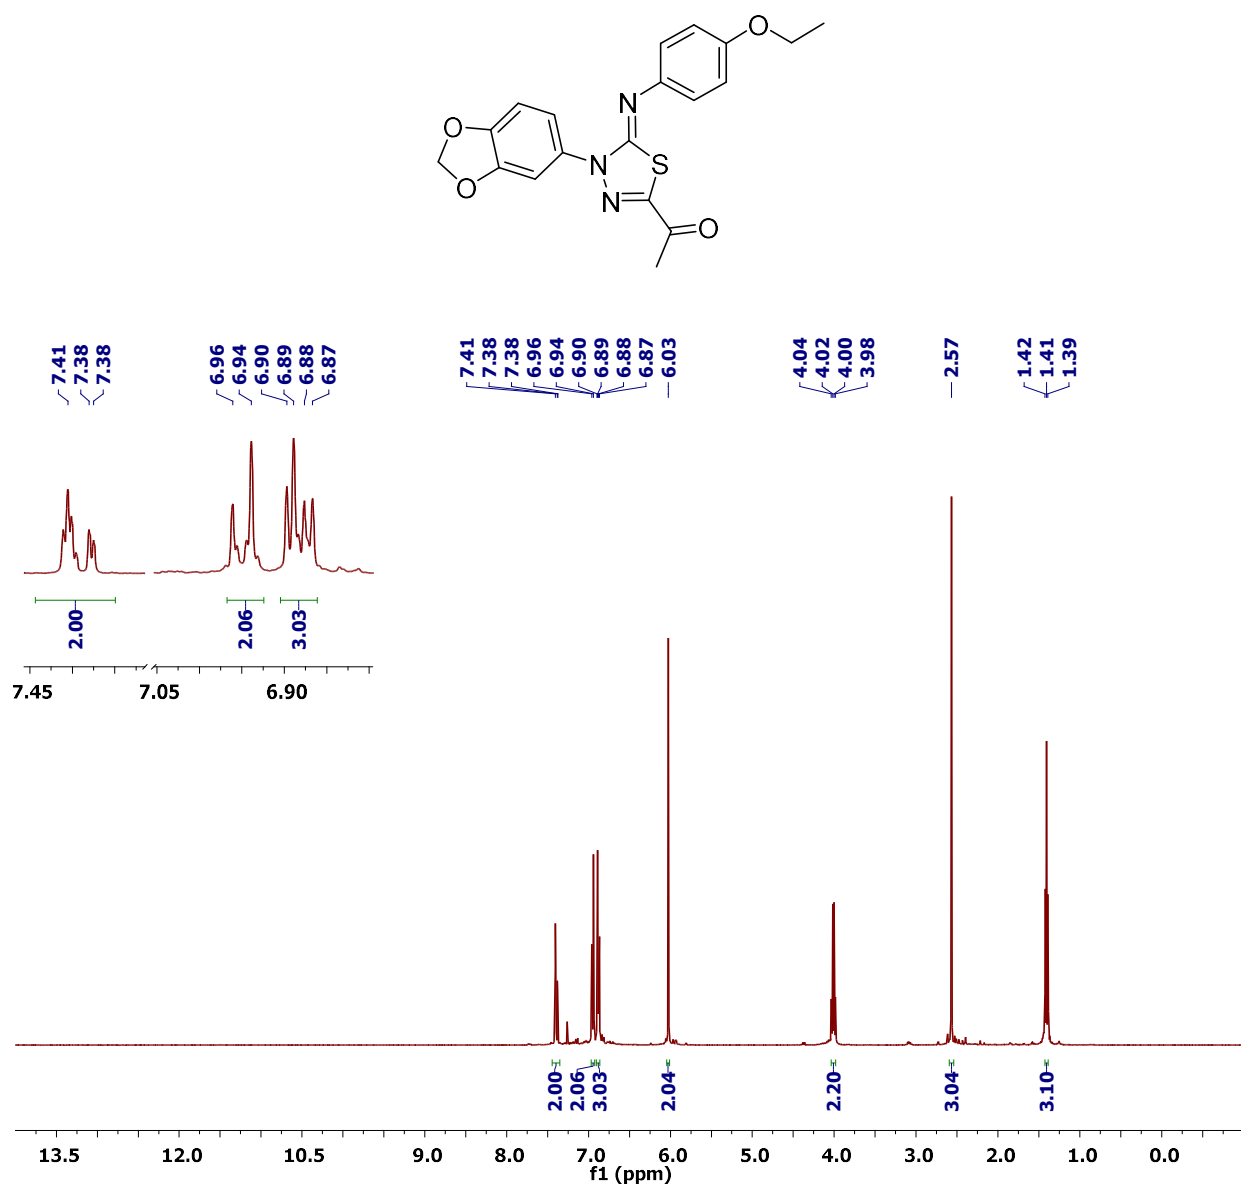

$^{13}\text{C}$  NMR ( $\text{CDCl}_3$ ) spectrum of (Z)-1-(4-(benzo[d][1,3]dioxol-5-yl)-5-((4-ethoxyphenyl)imino)-4,5-dihydro-1,3,4-thiadiazol-2-yl)ethan-1-one

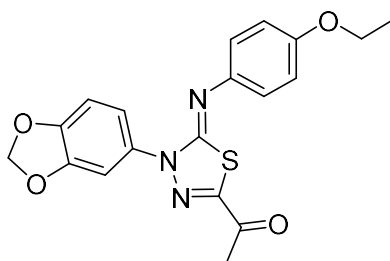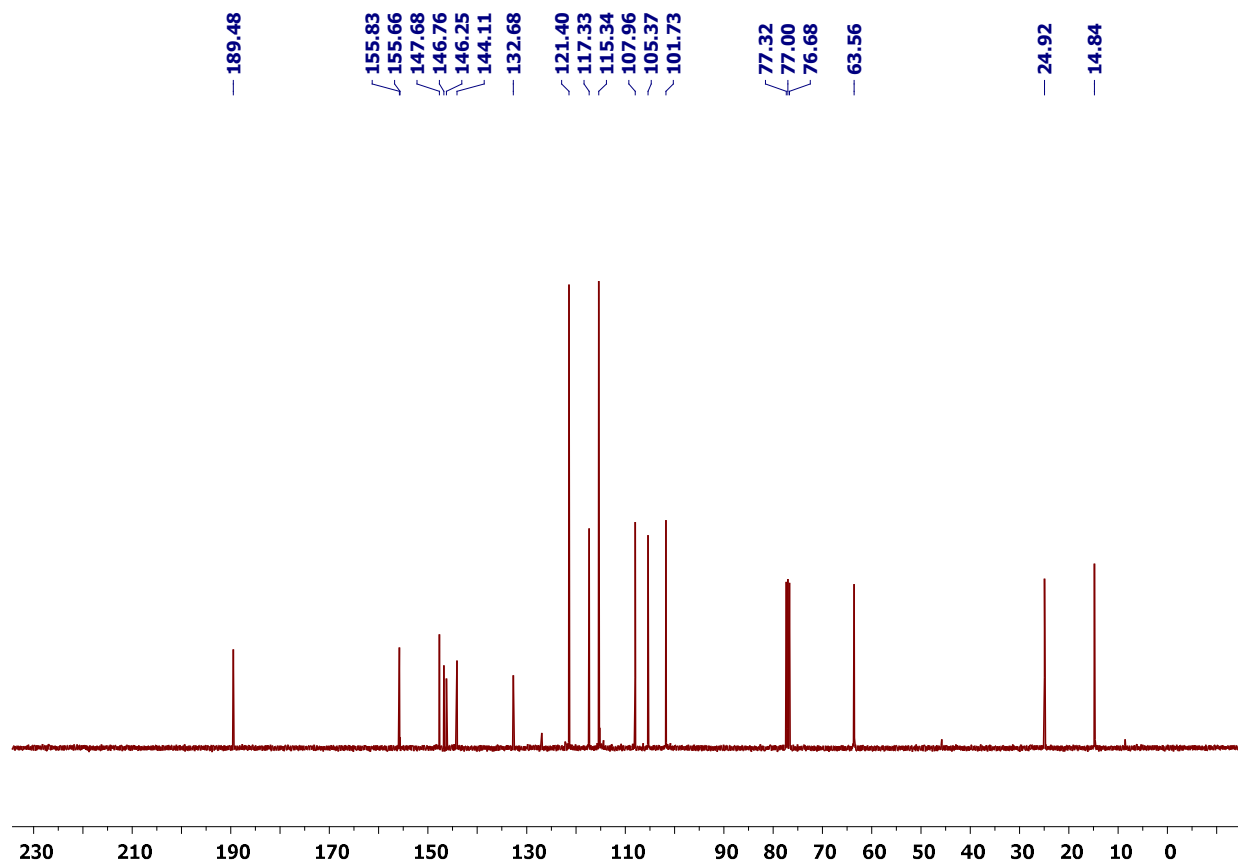

$^{13}\text{C}$  CRAPT NMR ( $\text{CDCl}_3$ ) spectrum of (Z)-1-(4-(benzo[d][1,3]dioxol-5-yl)-5-((4-ethoxyphenyl)imino)-4,5-dihydro-1,3,4-thiadiazol-2-yl)ethan-1-one

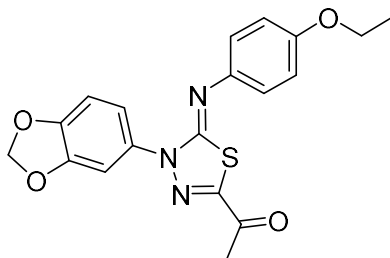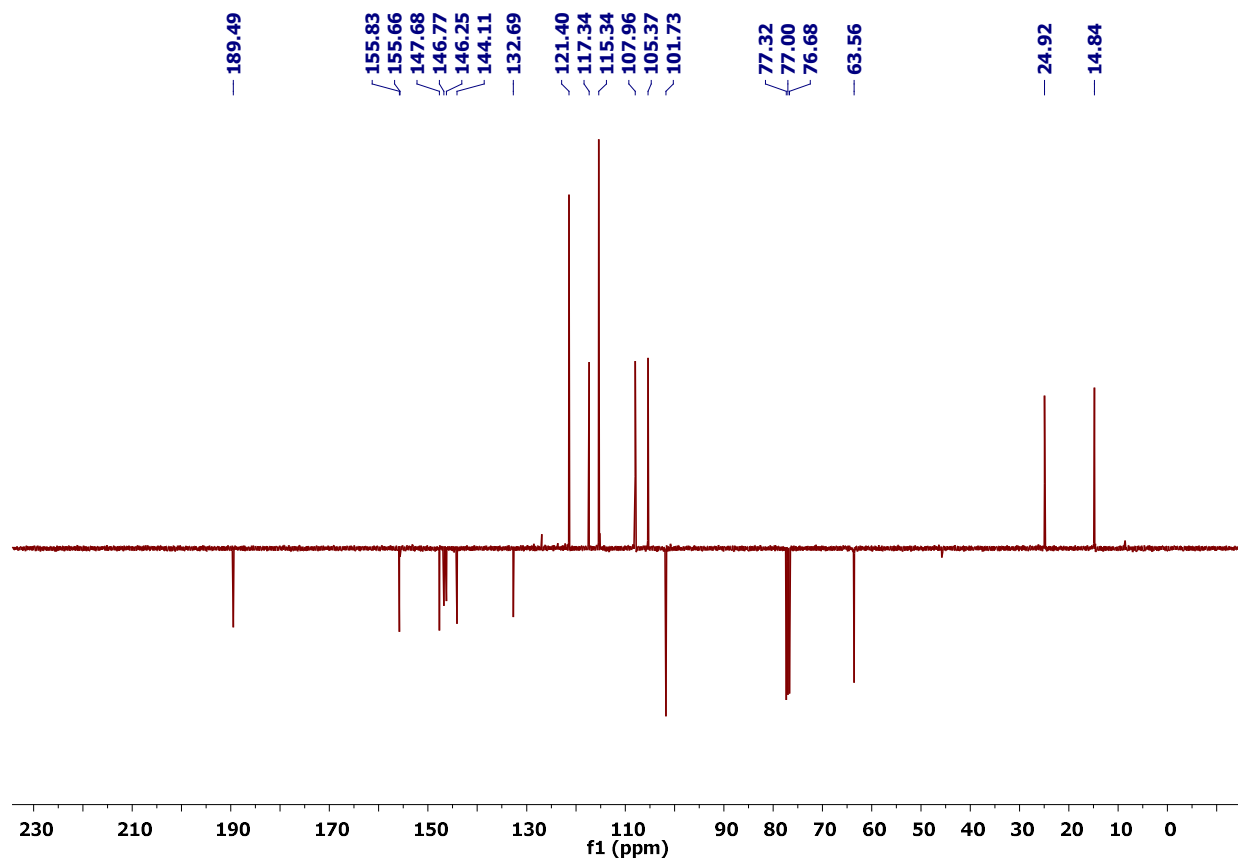

$^1\text{H}$ - $^1\text{H}$  gDQCOSY NMR ( $\text{CDCl}_3$ ) spectrum of (Z)-1-(4-(benzo[d][1,3]dioxol-5-yl)-5-((4-ethoxyphenyl)imino)-4,5-dihydro-1,3,4-thiadiazol-2-yl)ethan-1-one

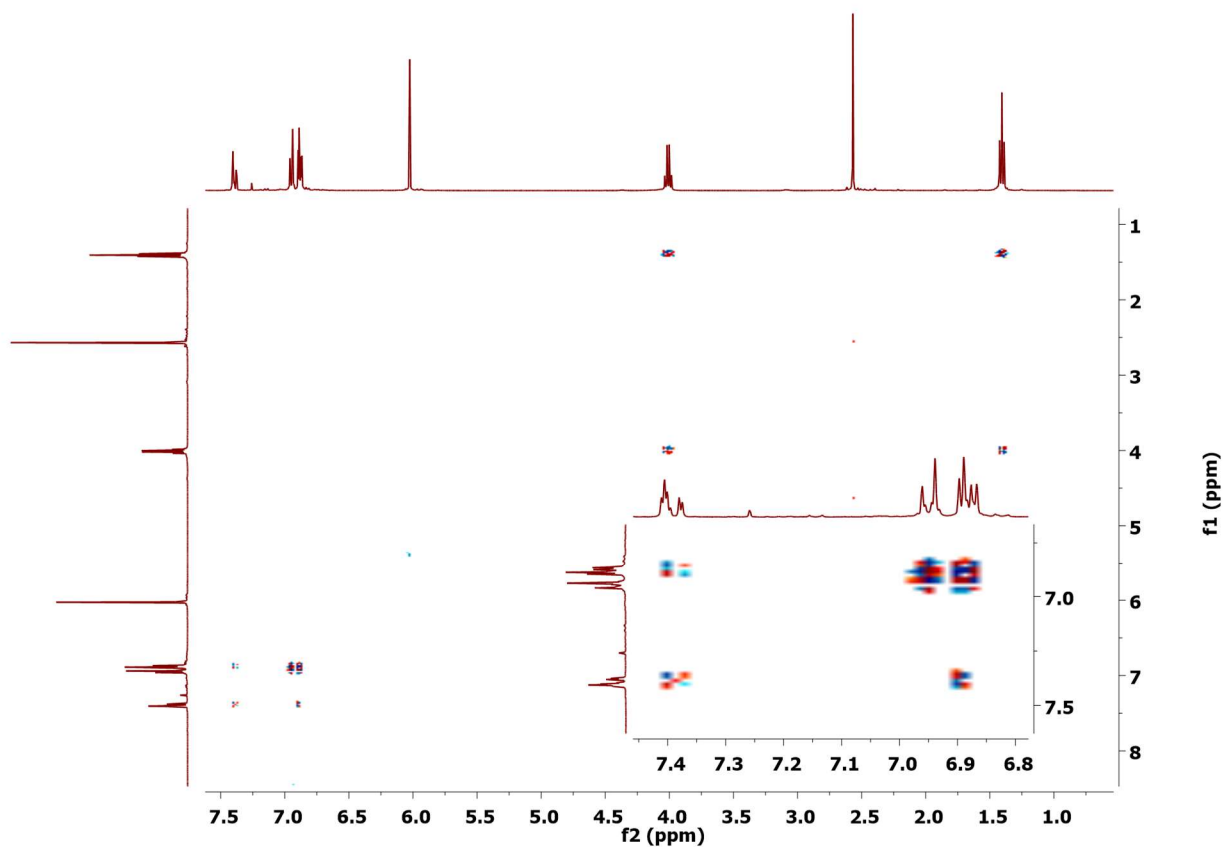

$^1\text{H}$ - $^{13}\text{C}$ -HSQC NMR ( $\text{CDCl}_3$ ) spectrum of (Z)-1-(4-(benzo[d][1,3]dioxol-5-yl)-5-((4-ethoxyphenyl)imino)-4,5-dihydro-1,3,4-thiadiazol-2-yl)ethan-1-one

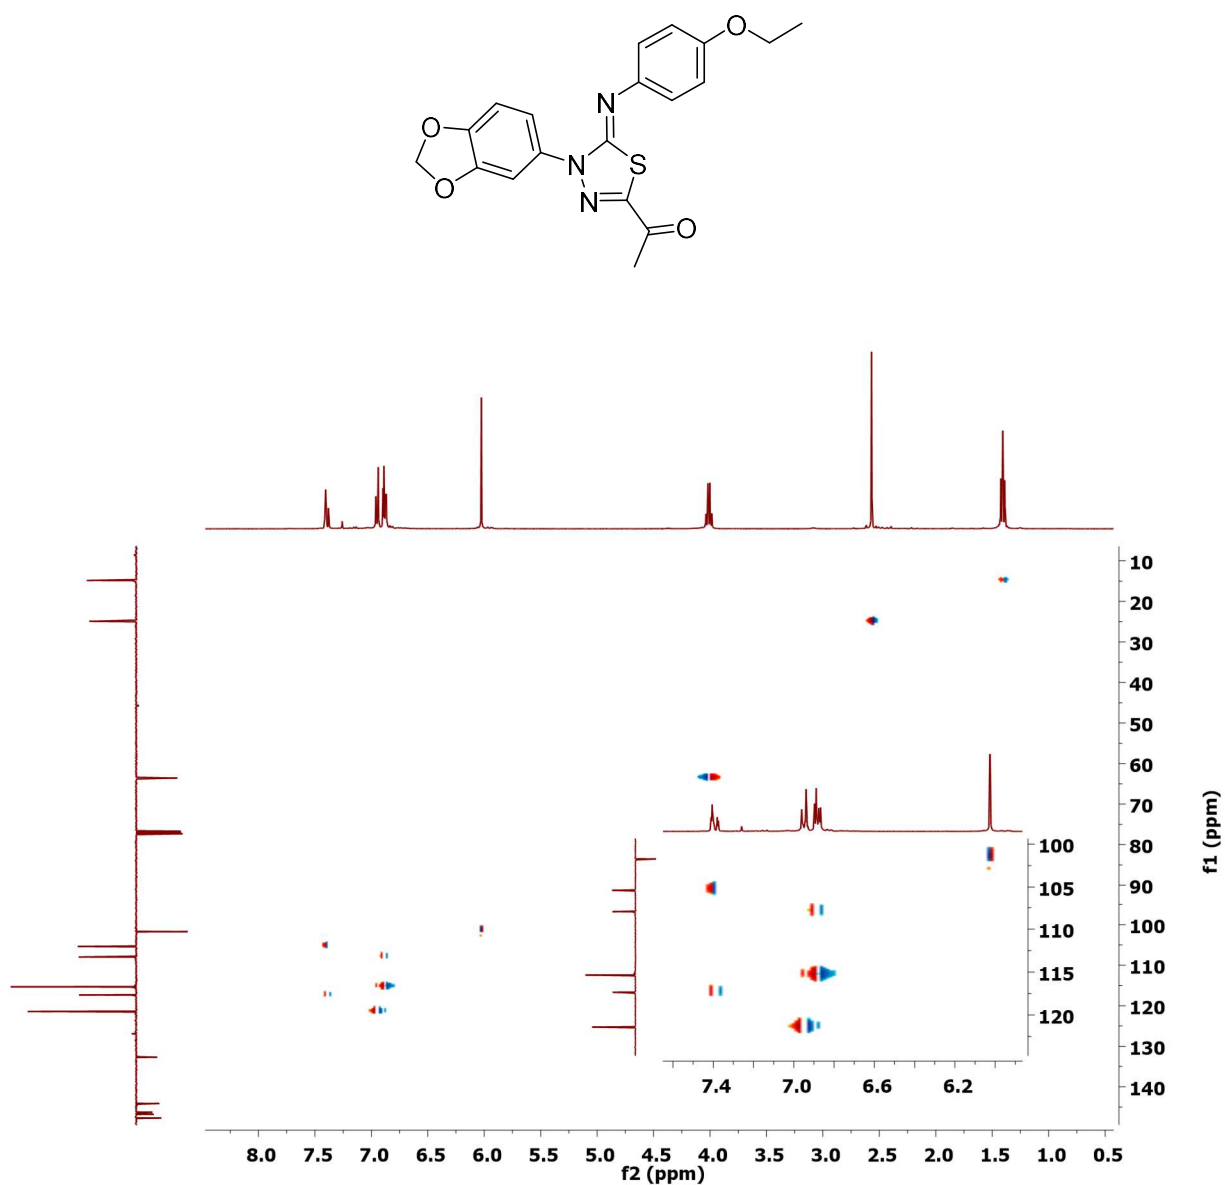

$^1\text{H}$ - $^{13}\text{C}$ -gHMBC NMR ( $\text{CDCl}_3$ ) spectrum of (Z)-1-(4-(benzo[d][1,3]dioxol-5-yl)-5-((4-ethoxyphenyl)imino)-4,5-dihydro-1,3,4-thiadiazol-2-yl)ethan-1-one

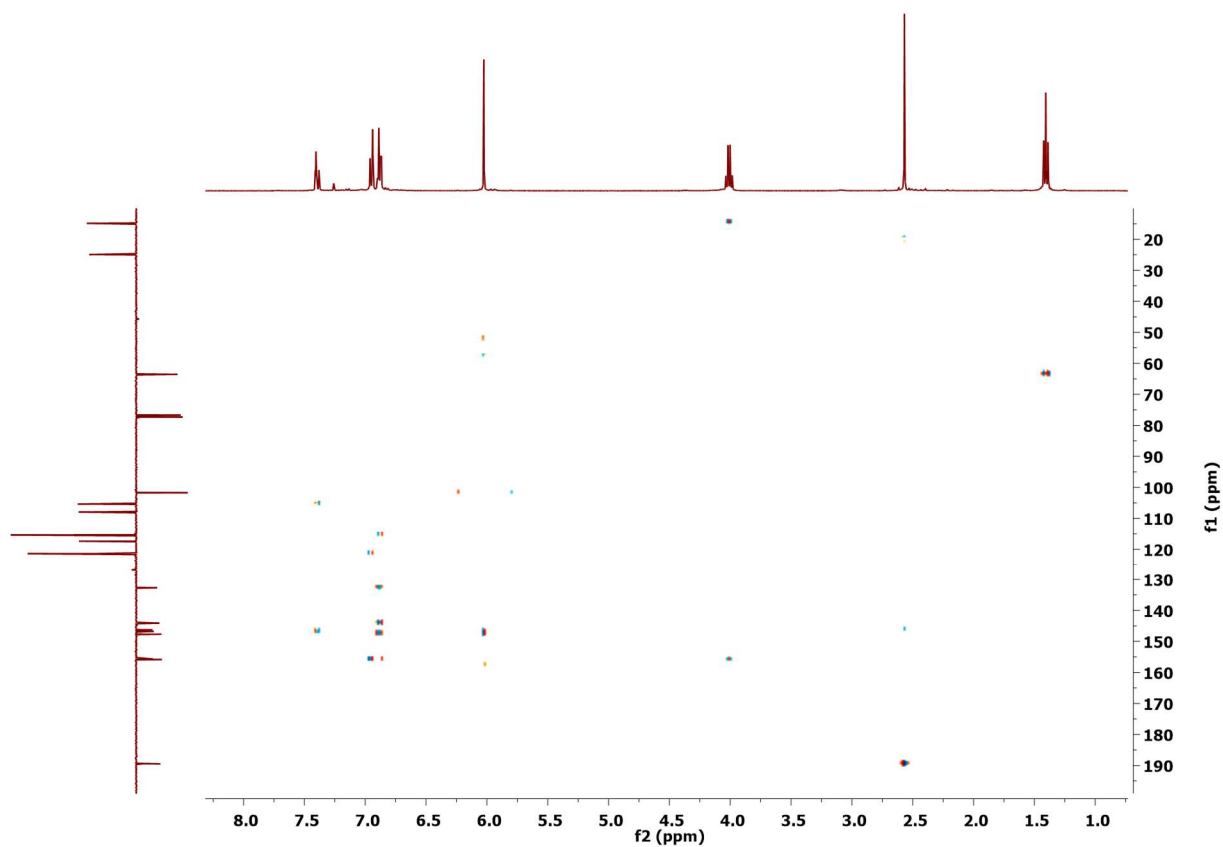

$^1\text{H}$  NMR ( $\text{CDCl}_3$ ) spectrum of (Z)-1-(4-(benzo[d][1,3]dioxol-5-yl)-5-((3,4-dimethoxyphenyl)imino)-4,5-dihydro-1,3,4-thiadiazol-2-yl)ethan-1-one

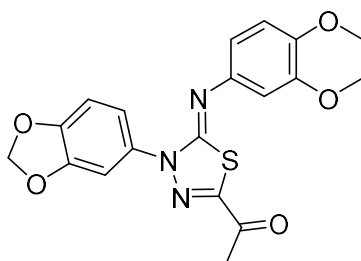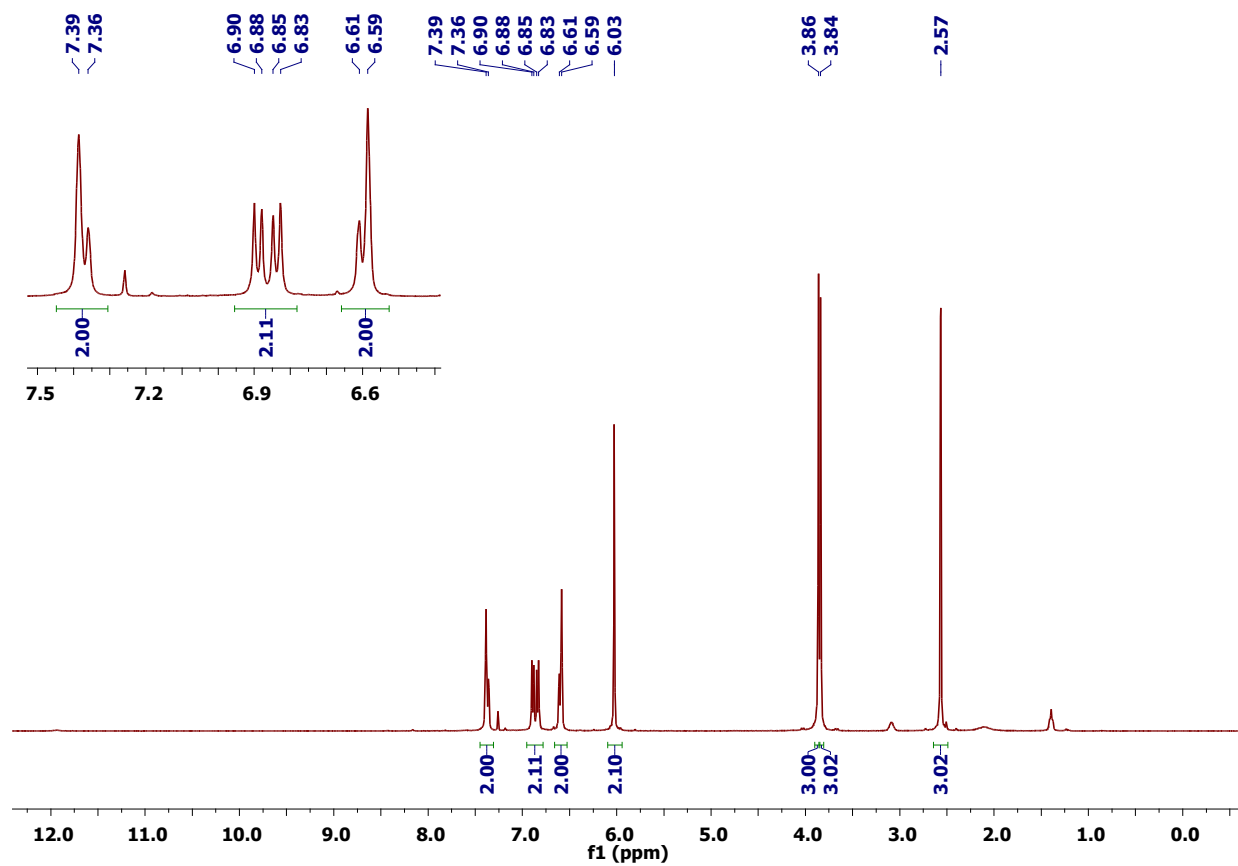



$^{13}\text{C}$  NMR ( $\text{CDCl}_3$ ) spectrum of (Z)-1-(4-(benzo[d][1,3]dioxol-5-yl)-5-((3,4-dimethoxyphenyl)imino)-4,5-dihydro-1,3,4-thiadiazol-2-yl)ethan-1-one

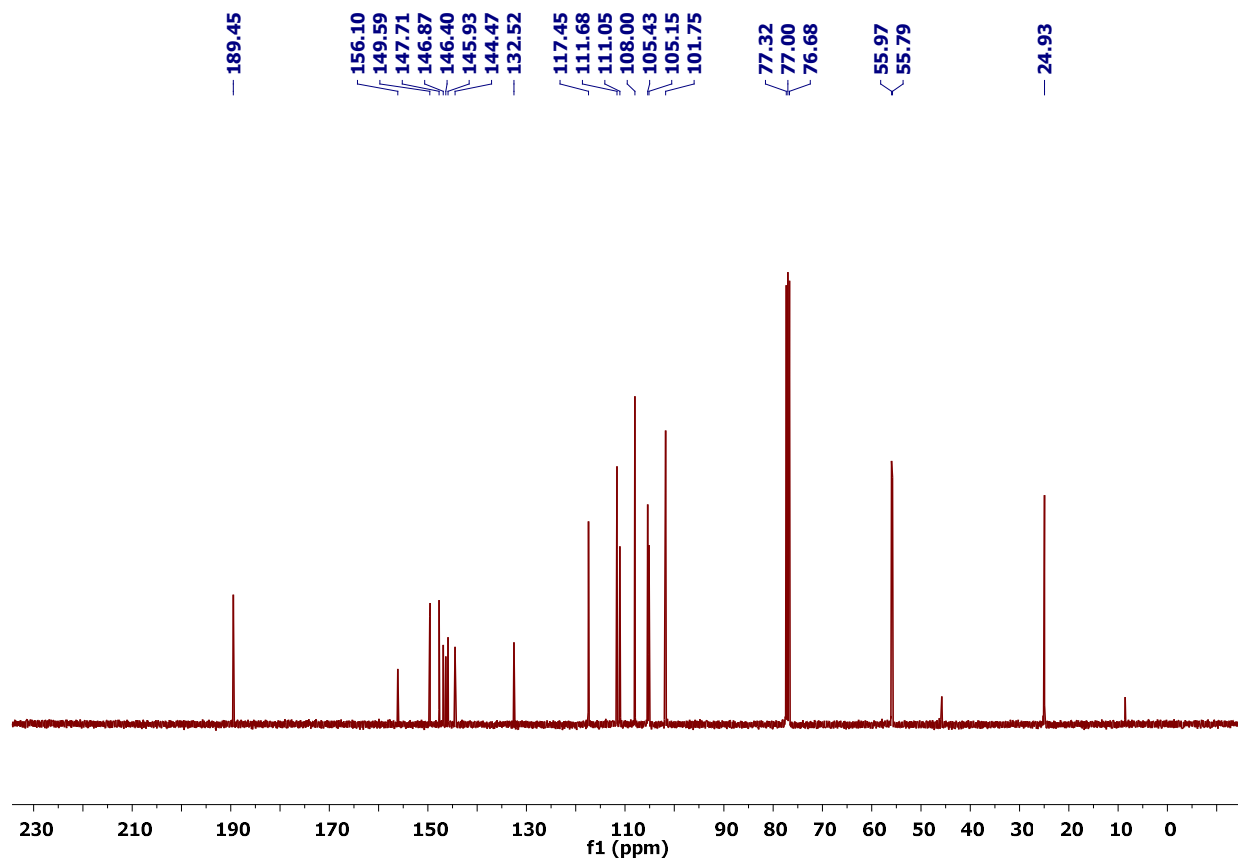

$^{13}\text{C}$  CRAPT NMR ( $\text{CDCl}_3$ ) spectrum of (Z)-1-(4-(benzo[d][1,3]dioxol-5-yl)-5-((3,4-dimethoxyphenyl)imino)-4,5-dihydro-1,3,4-thiadiazol-2-yl)ethan-1-one

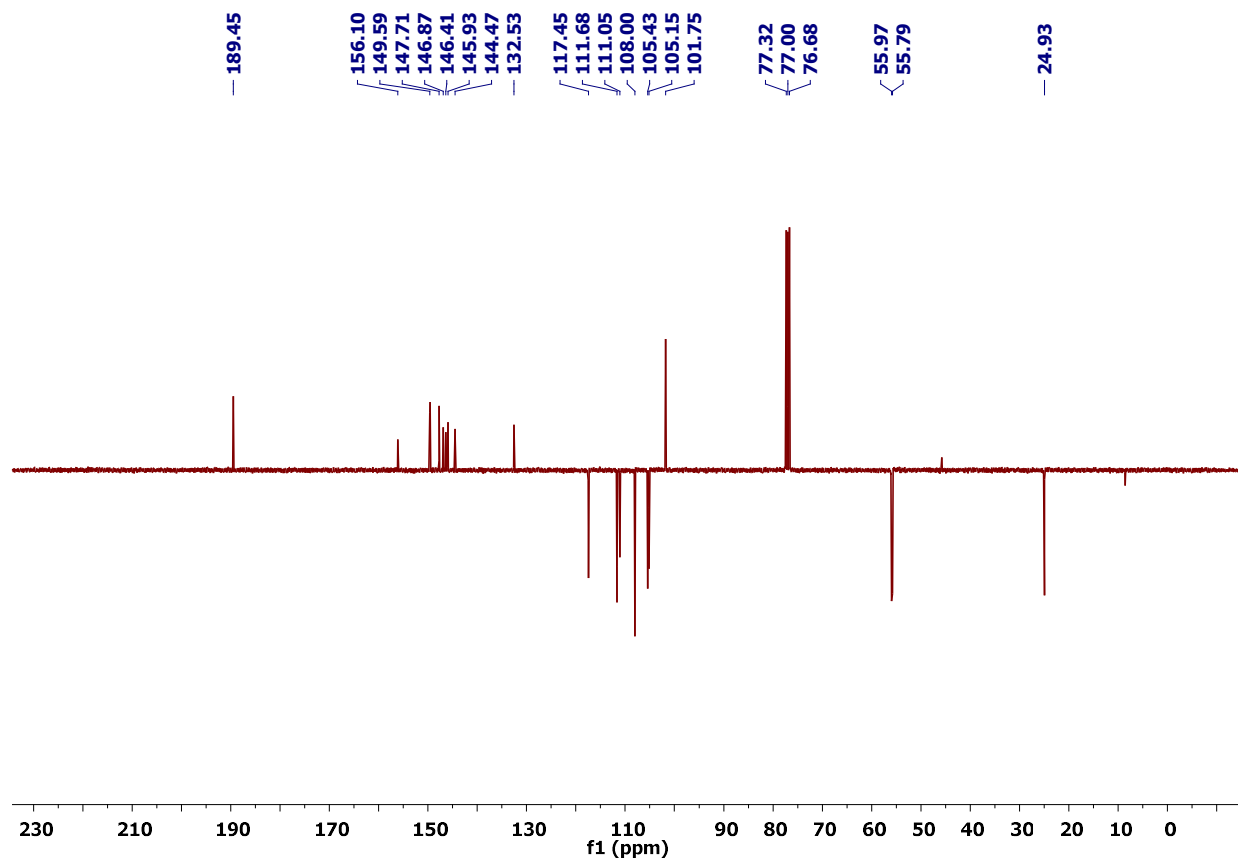

$^1\text{H}$ - $^1\text{H}$  gDQCOSY NMR ( $\text{CDCl}_3$ ) spectrum of (Z)-1-(4-(benzo[d][1,3]dioxol-5-yl)-5-((3,4-dimethoxyphenyl)imino)-4,5-dihydro-1,3,4-thiadiazol-2-yl)ethan-1-one

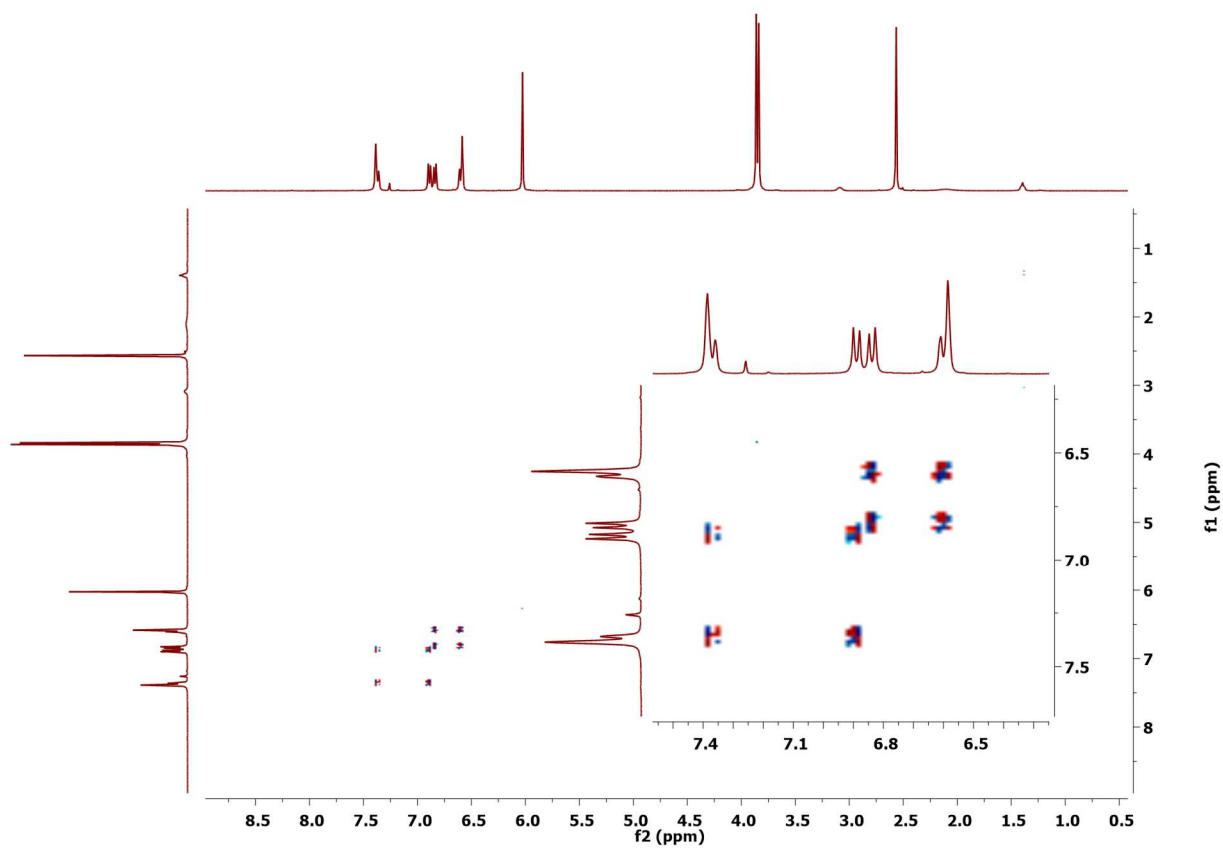

<sup>1</sup>H-<sup>13</sup>C-HSQC NMR (CDCl<sub>3</sub>) spectrum of (Z)-1-(4-(benzo[d][1,3]dioxol-5-yl)-5-((3,4-dimethoxyphenyl)imino)-4,5-dihydro-1,3,4-thiadiazol-2-yl)ethan-1-one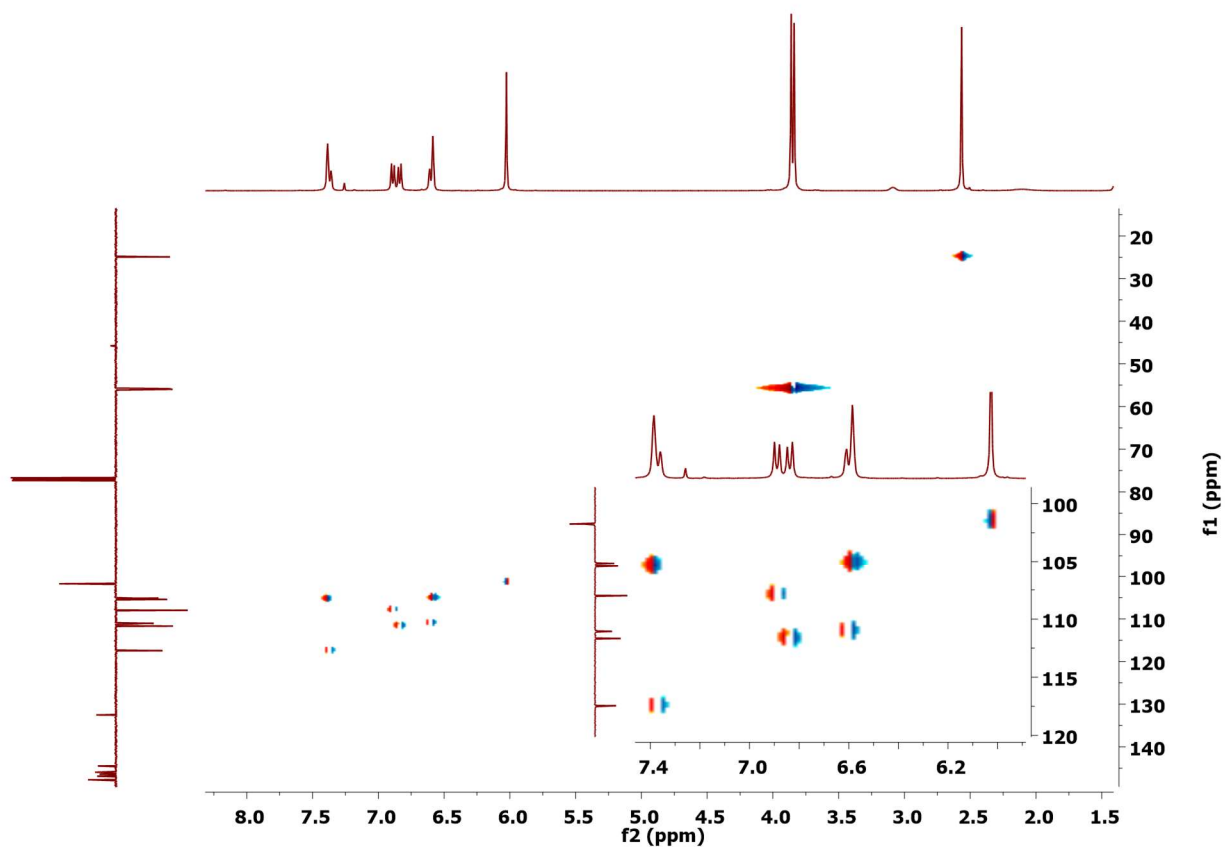

$^1\text{H}$ - $^{13}\text{C}$ -gHMBC NMR ( $\text{CDCl}_3$ ) spectrum of (Z)-1-(4-(benzo[d][1,3]dioxol-5-yl)-5-((3,4-dimethoxyphenyl)imino)-4,5-dihydro-1,3,4-thiadiazol-2-yl)ethan-1-one

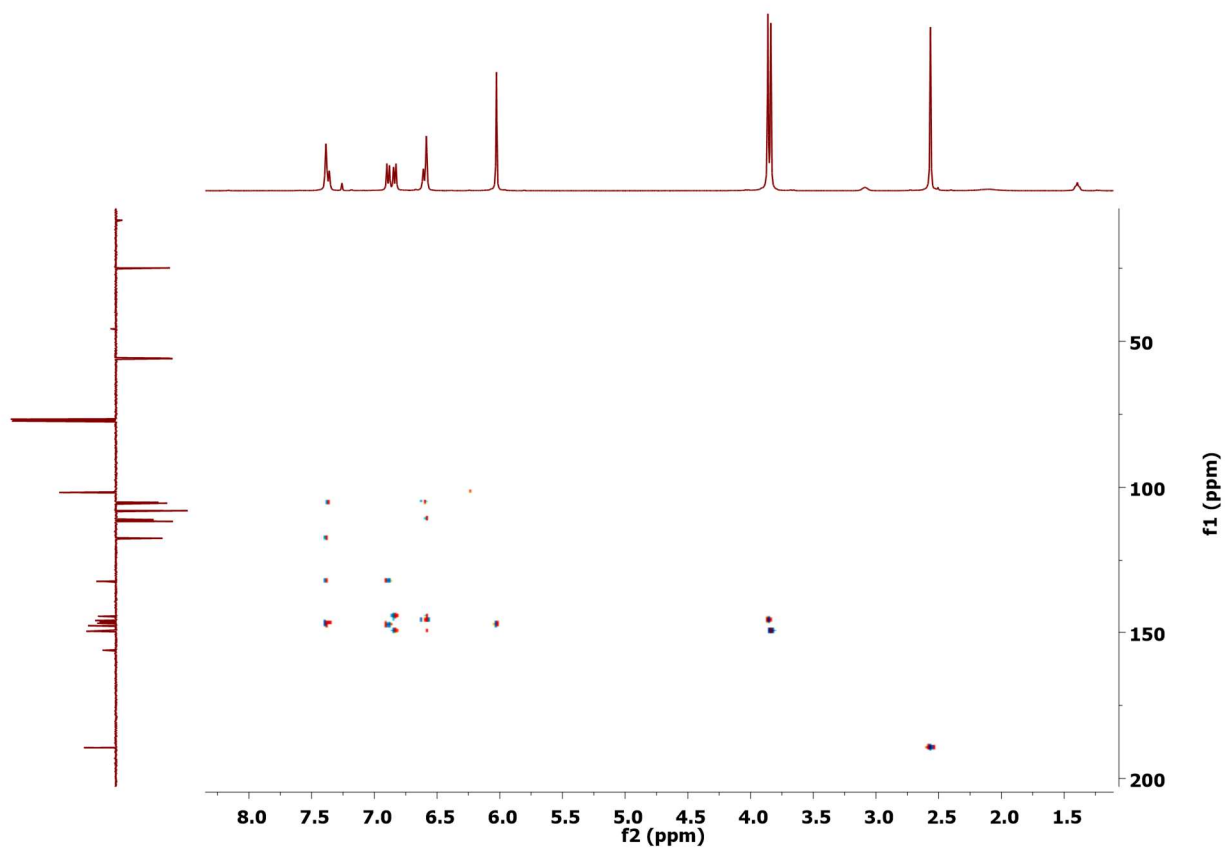

$^1\text{H}$  NMR ( $\text{CDCl}_3$ ) spectrum of (Z)-1-(5-((3,4-dimethoxyphenyl)imino)-4-(4-methoxyphenyl)-4,5-dihydro-1,3,4-thiadiazol-2-yl)ethan-1-one

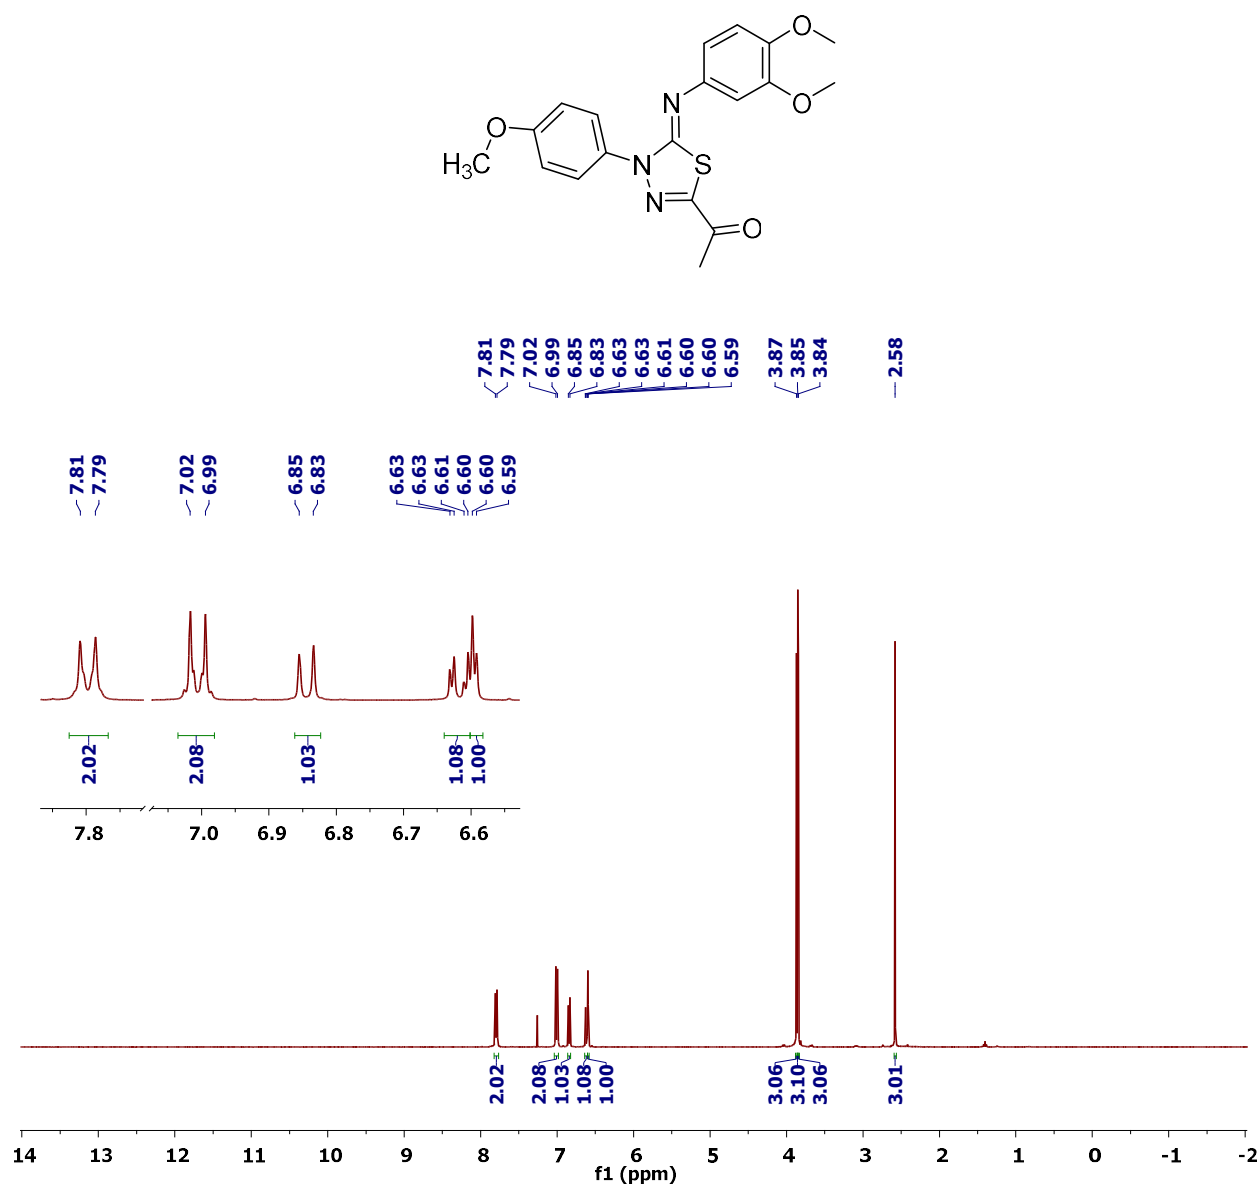

$^{13}\text{C}$  NMR ( $\text{CDCl}_3$ ) spectrum of (Z)-1-(5-((3,4-dimethoxyphenyl)imino)-4-(4-methoxyphenyl)-4,5-dihydro-1,3,4-thiadiazol-2-yl)ethan-1-one

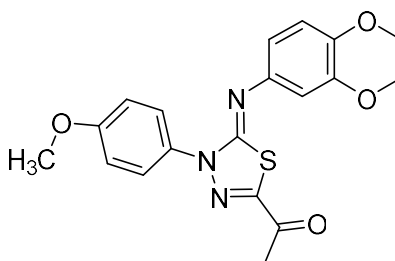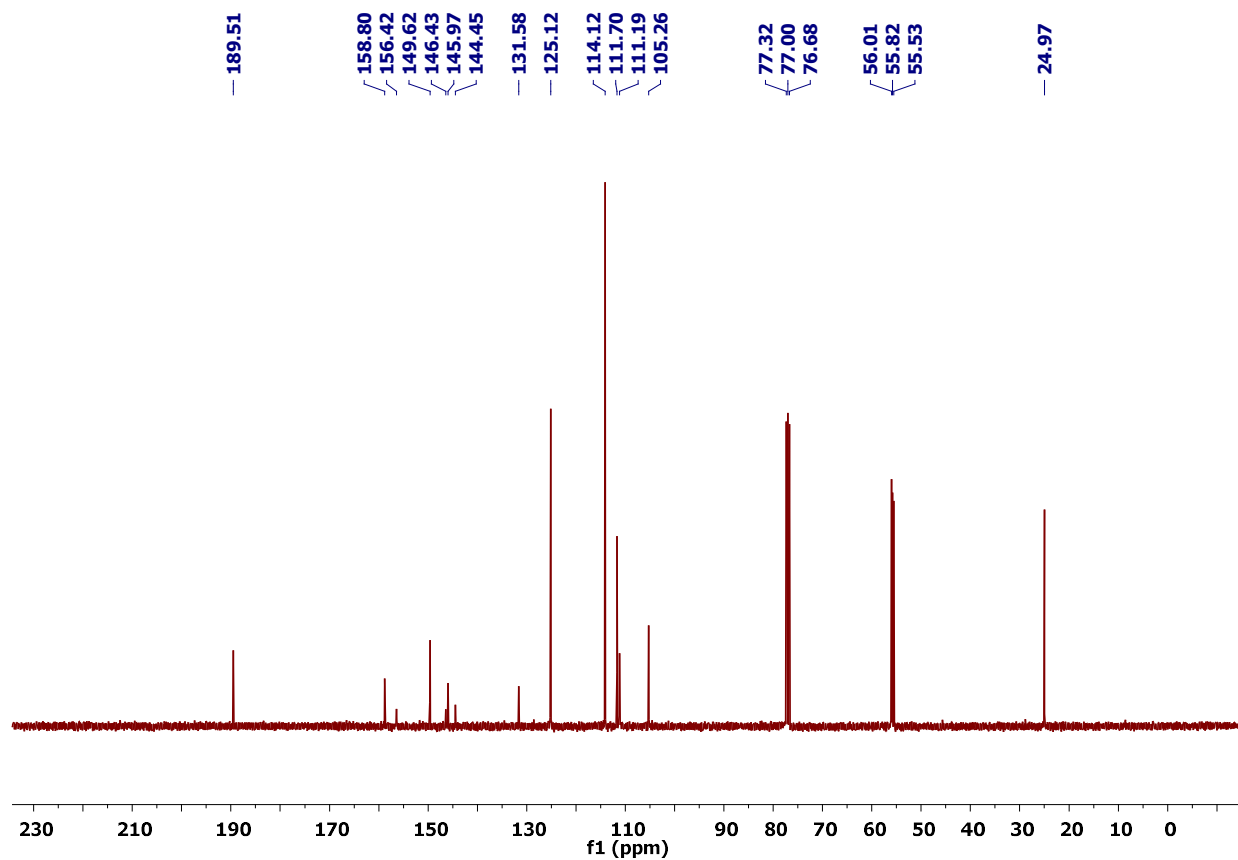

$^{13}\text{C}$  CRAPT NMR ( $\text{CDCl}_3$ ) spectrum of (Z)-1-(5-((3,4-dimethoxyphenyl)imino)-4-(4-methoxyphenyl)-4,5-dihydro-1,3,4-thiadiazol-2-yl)ethan-1-one

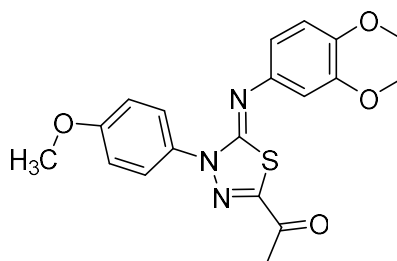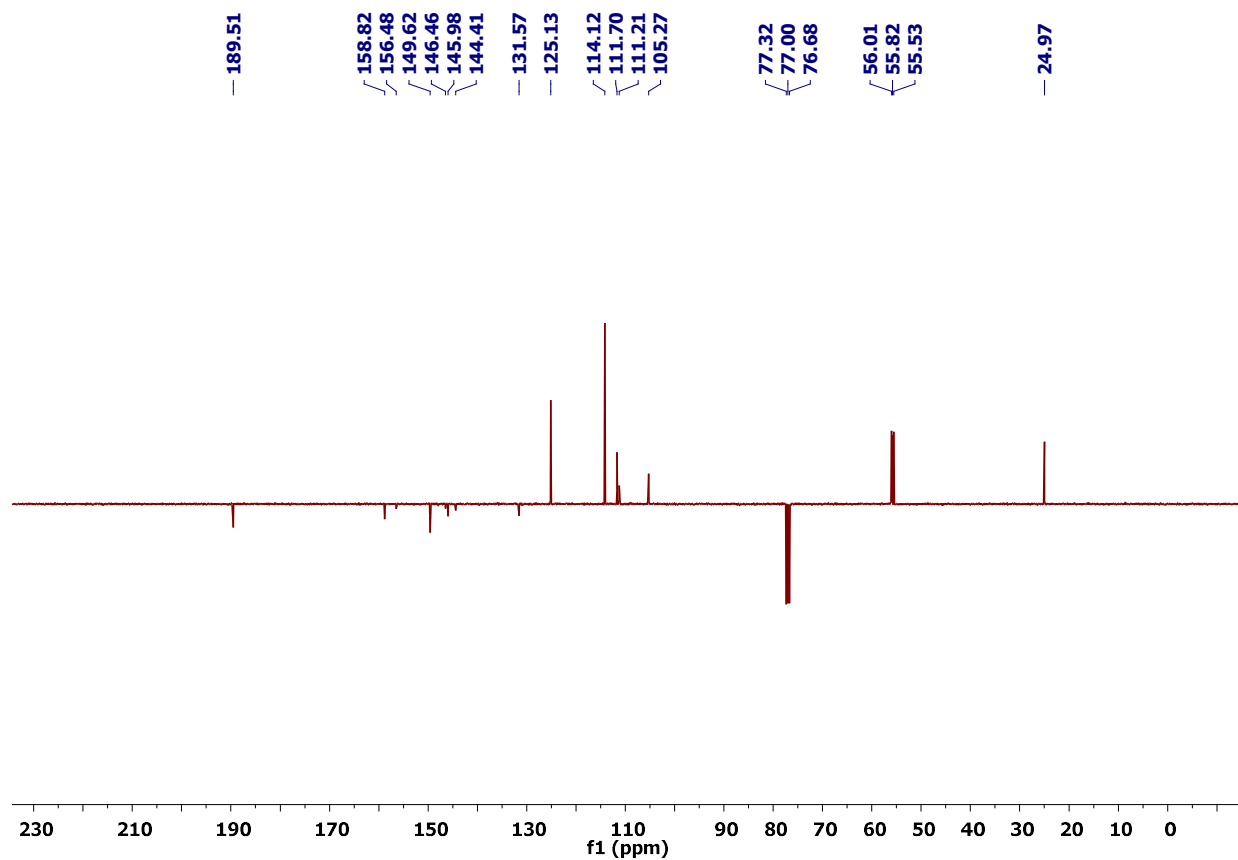



$^1\text{H}$ - $^1\text{H}$  gDQCOSY NMR ( $\text{CDCl}_3$ ) spectrum of (Z)-1-(5-((3,4-dimethoxyphenyl)imino)-4-(4-methoxyphenyl)-4,5-dihydro-1,3,4-thiadiazol-2-yl)ethan-1-one

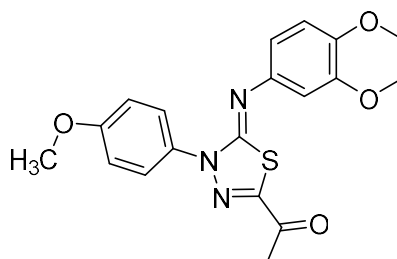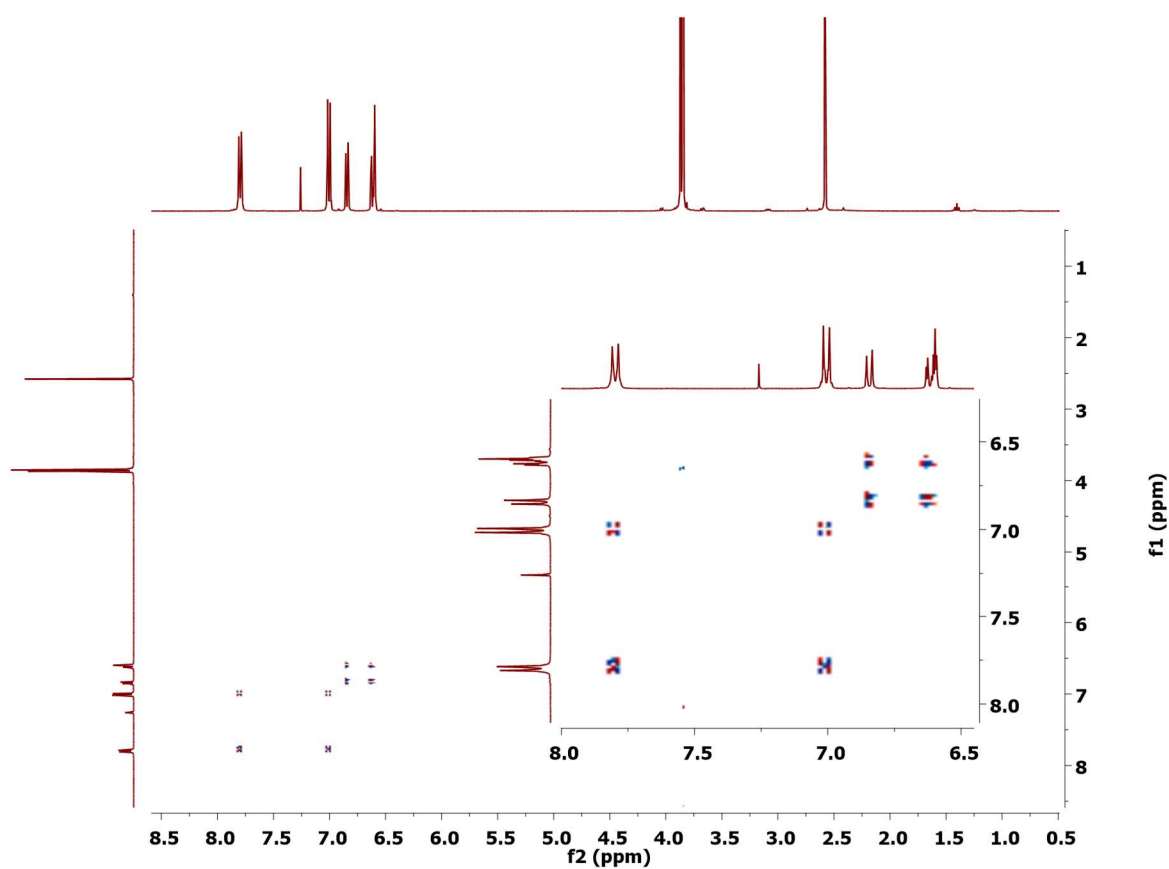

$^1\text{H}$ - $^{13}\text{C}$ -HSQC NMR ( $\text{CDCl}_3$ ) spectrum of (Z)-1-(5-((3,4-dimethoxyphenyl)imino)-4-(4-methoxyphenyl)-4,5-dihydro-1,3,4-thiadiazol-2-yl)ethan-1-one

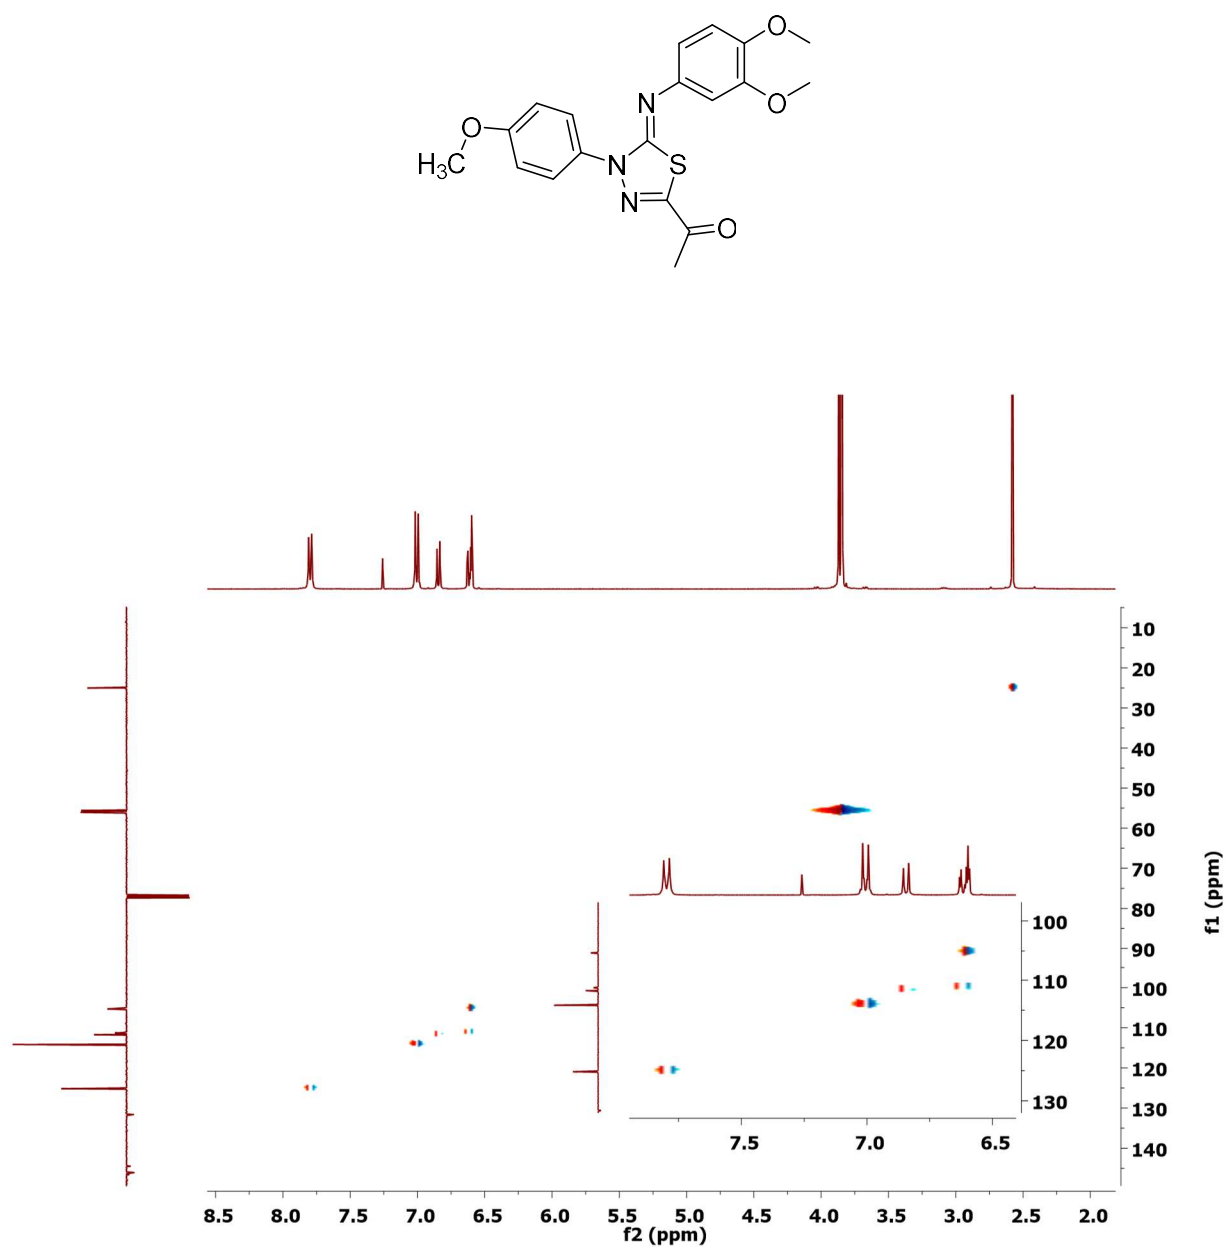

$^1\text{H}$ - $^{13}\text{C}$ -gHMBC NMR ( $\text{CDCl}_3$ ) spectrum of (Z)-1-(5-((3,4-dimethoxyphenyl)imino)-4-(4-methoxyphenyl)-4,5-dihydro-1,3,4-thiadiazol-2-yl)ethan-1-one

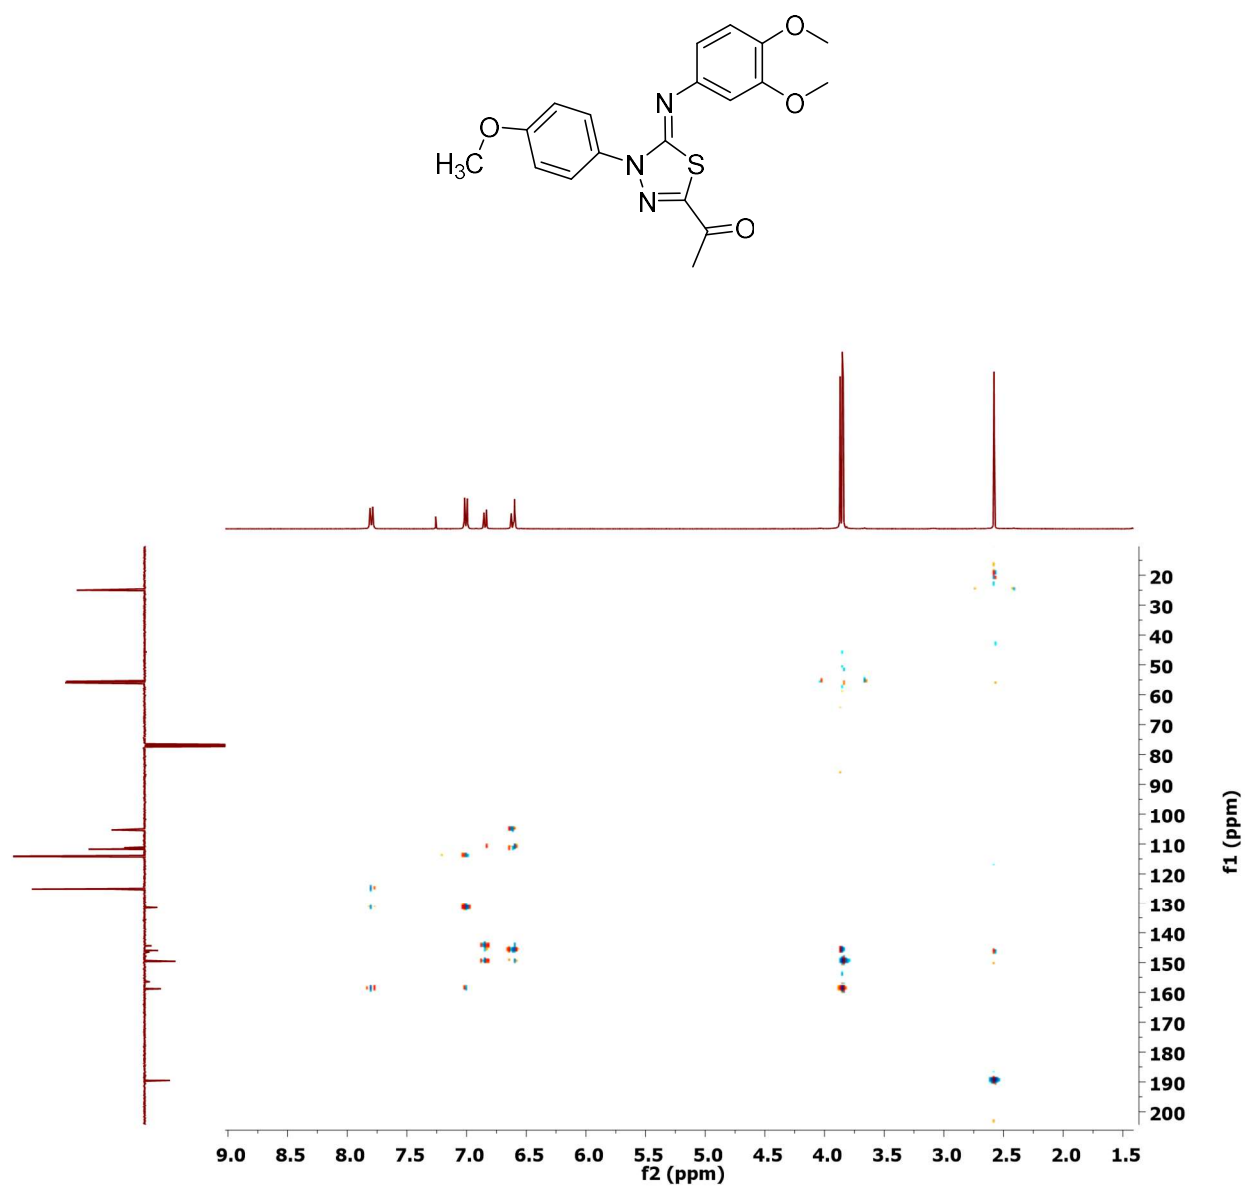

$^1\text{H}$  NMR ( $\text{CDCl}_3$ ) spectrum of (Z)-1-(4-(3,5-bis(trifluoromethyl)phenyl)-5-((2,5-dimethoxyphenyl)imino)-4,5-dihydro-1,3,4-thiadiazol-2-yl)ethan-1-one

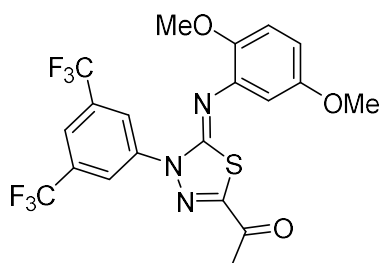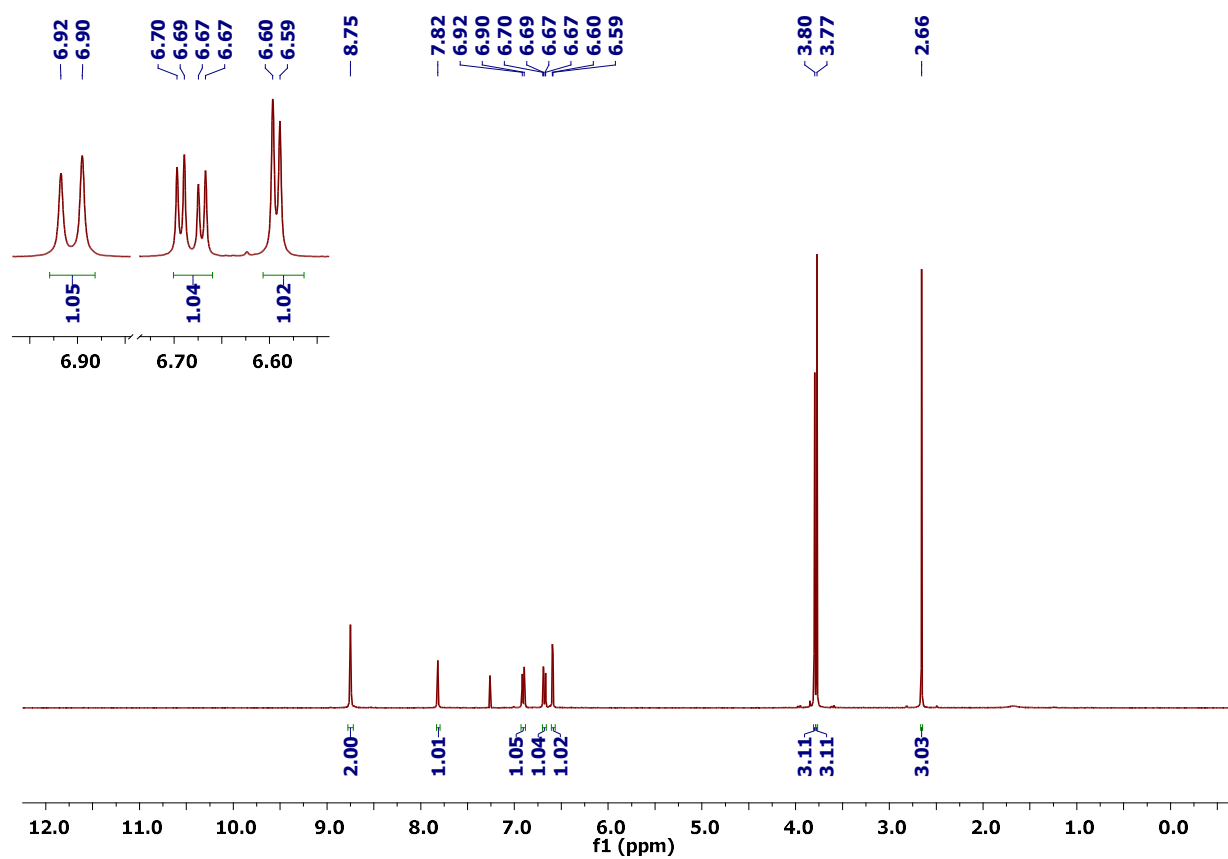

$^{13}\text{C}$  CRAPT NMR ( $\text{CDCl}_3$ ) spectrum of (Z)-1-(4-(3,5-bis(trifluoromethyl)phenyl)-5-((2,5-dimethoxyphenyl)imino)-4,5-dihydro-1,3,4-thiadiazol-2-yl)ethan-1-one

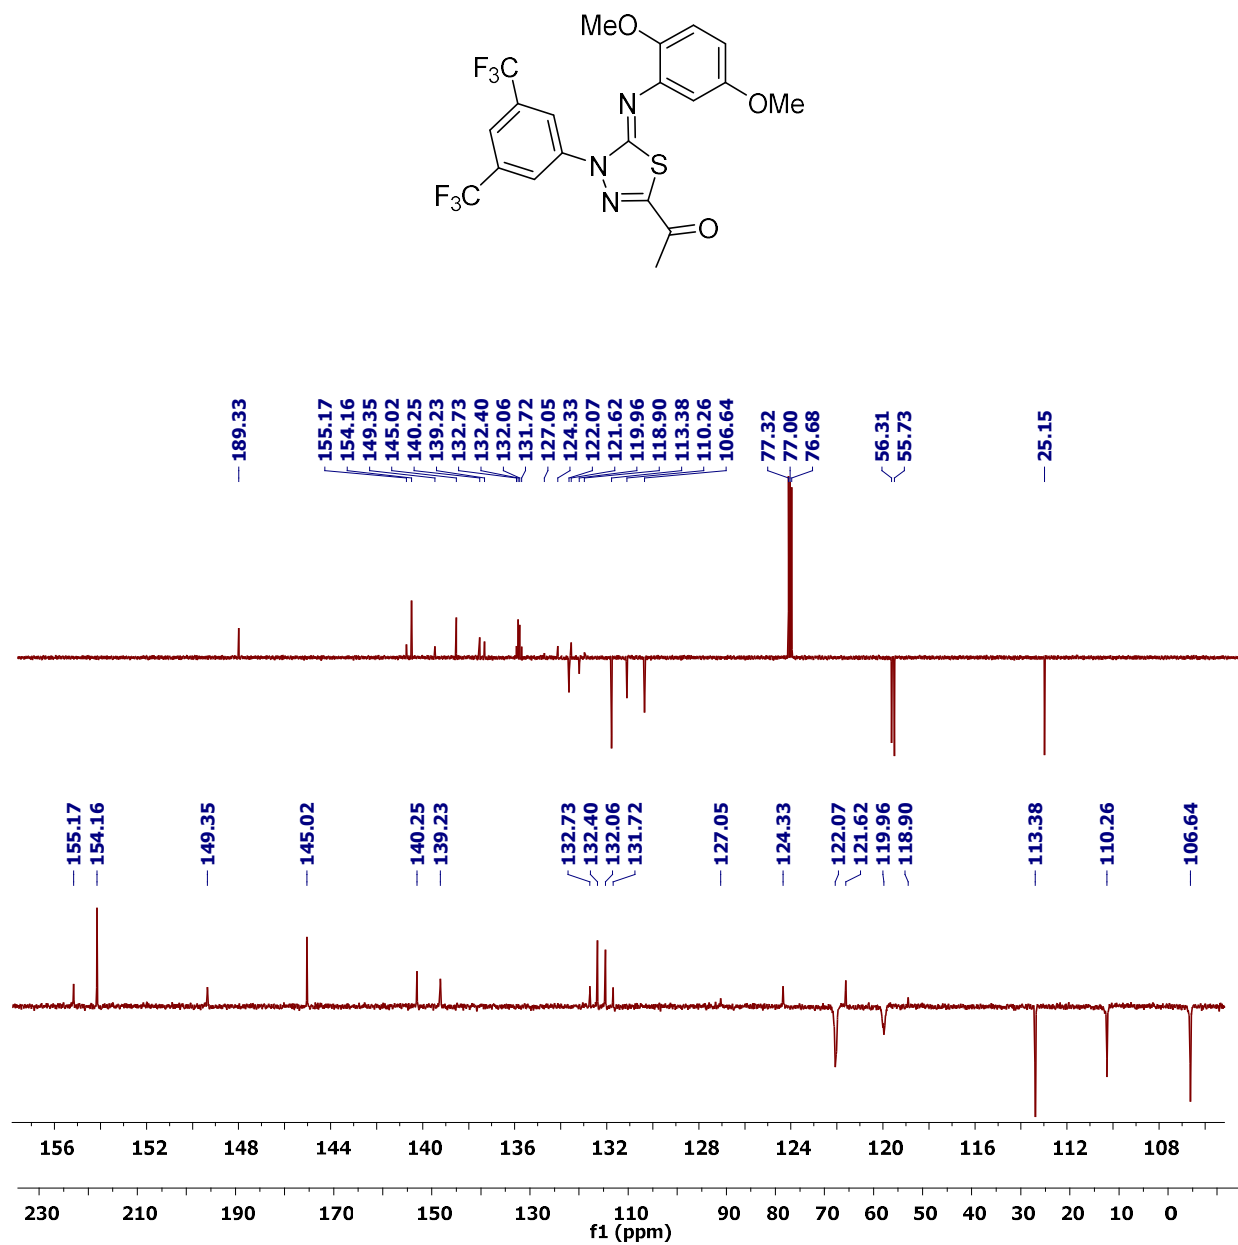

$^1\text{H}$ - $^1\text{H}$  gDQCOSY NMR ( $\text{CDCl}_3$ ) spectrum of (Z)-1-(4-(3,5-bis(trifluoromethyl)phenyl)-5-((2,5-dimethoxyphenyl)imino)-4,5-dihydro-1,3,4-thiadiazol-2-yl)ethan-1-one

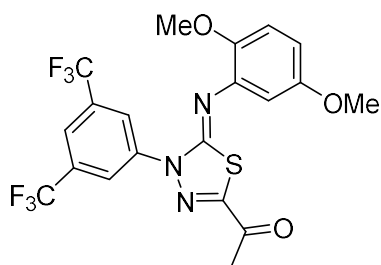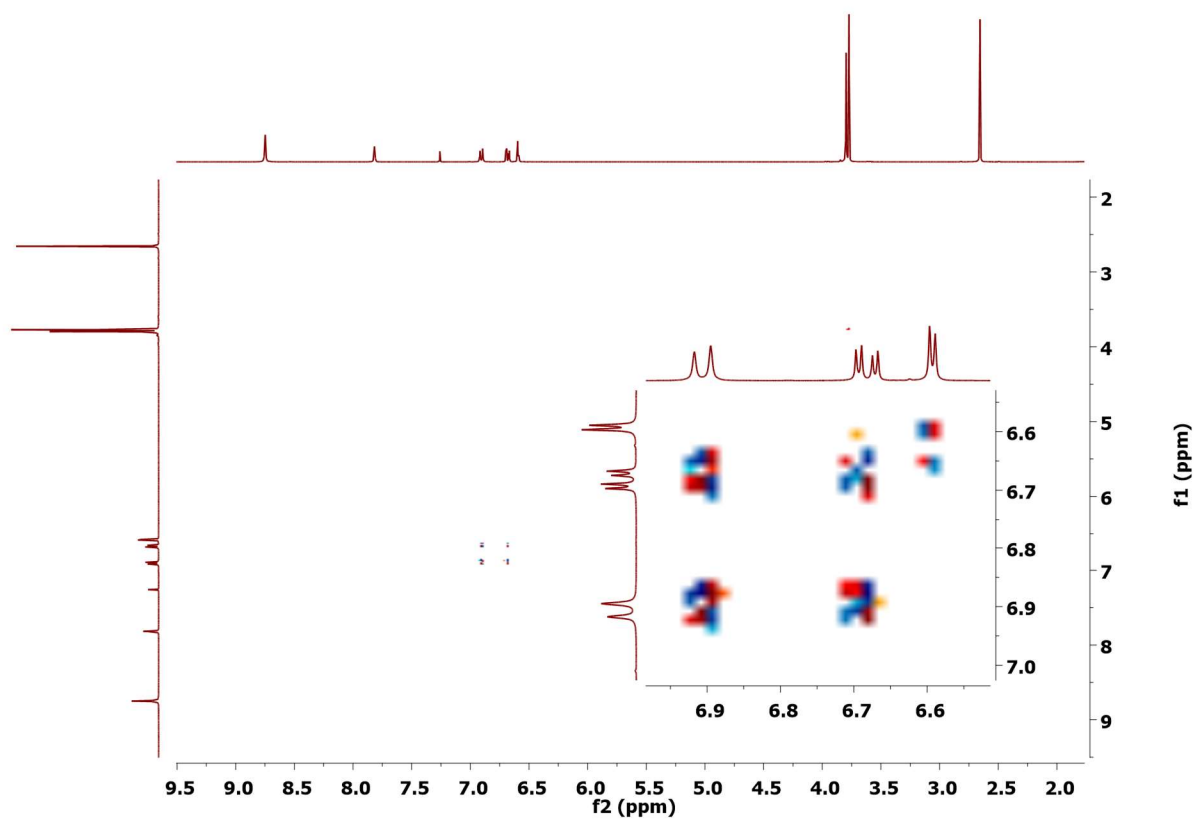

$^1\text{H}$ - $^{13}\text{C}$ -HSQC NMR ( $\text{CDCl}_3$ ) spectrum of (Z)-1-(4-(3,5-bis(trifluoromethyl)phenyl)-5-((2,5-dimethoxyphenyl)imino)-4,5-dihydro-1,3,4-thiadiazol-2-yl)ethan-1-one

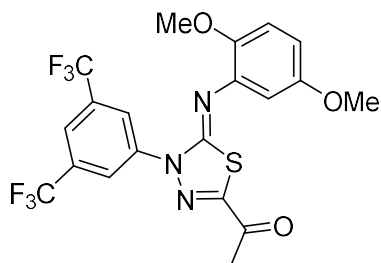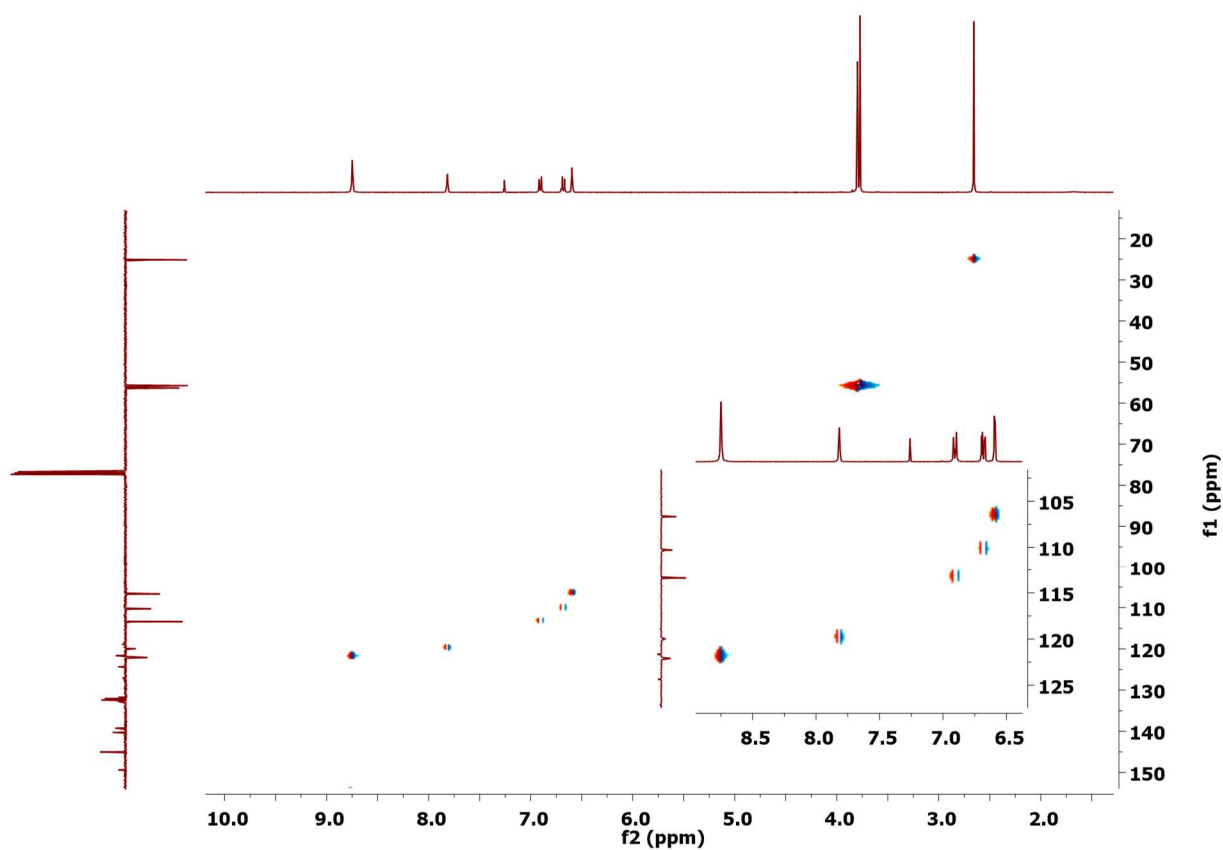

$^1\text{H}$ - $^{13}\text{C}$ -gHMBC NMR ( $\text{CDCl}_3$ ) spectrum of (Z)-1-(4-(3,5-bis(trifluoromethyl)phenyl)-5-((2,5-dimethoxyphenyl)imino)-4,5-dihydro-1,3,4-thiadiazol-2-yl)ethan-1-one

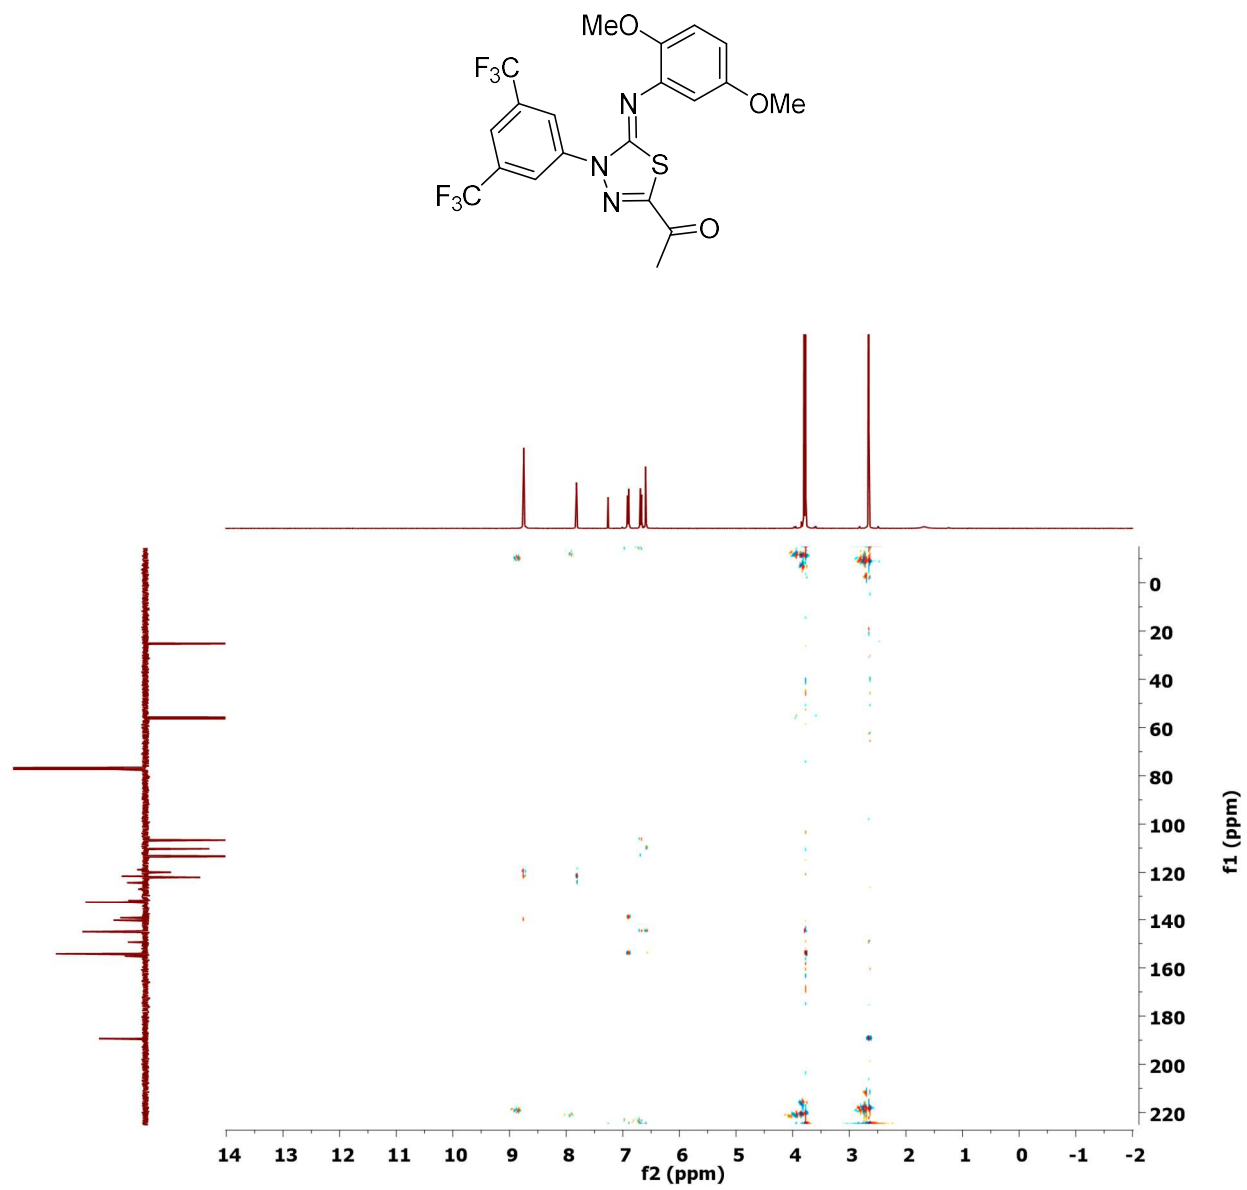



$^1\text{H}$  NMR ( $\text{CDCl}_3$ ) spectrum of ethyl (Z)-4-((5-acetyl-3-(4-bromophenyl)-1,3,4-thiadiazol-2(3H)-ylidene)amino)benzoate

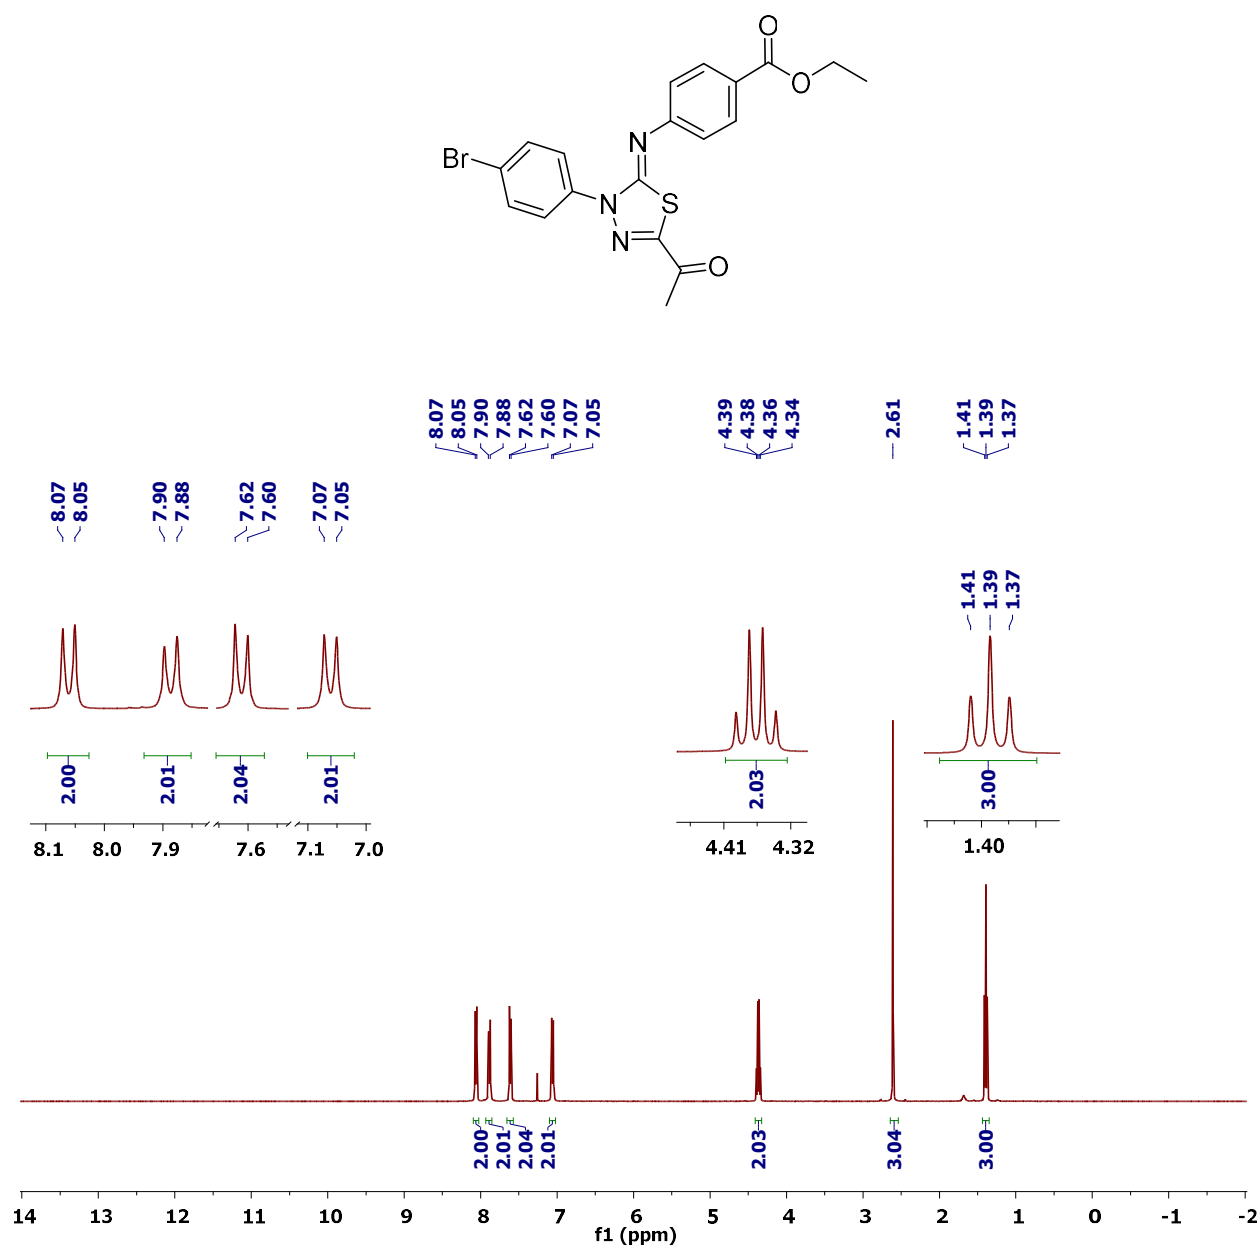

$^{13}\text{C}$  NMR ( $\text{CDCl}_3$ ) spectrum of ethyl (Z)-4-((5-acetyl-3-(4-bromophenyl)-1,3,4-thiadiazol-2(3H)-ylidene)amino)benzoate

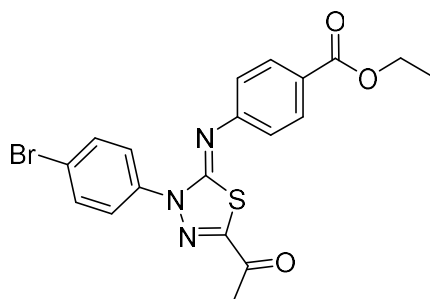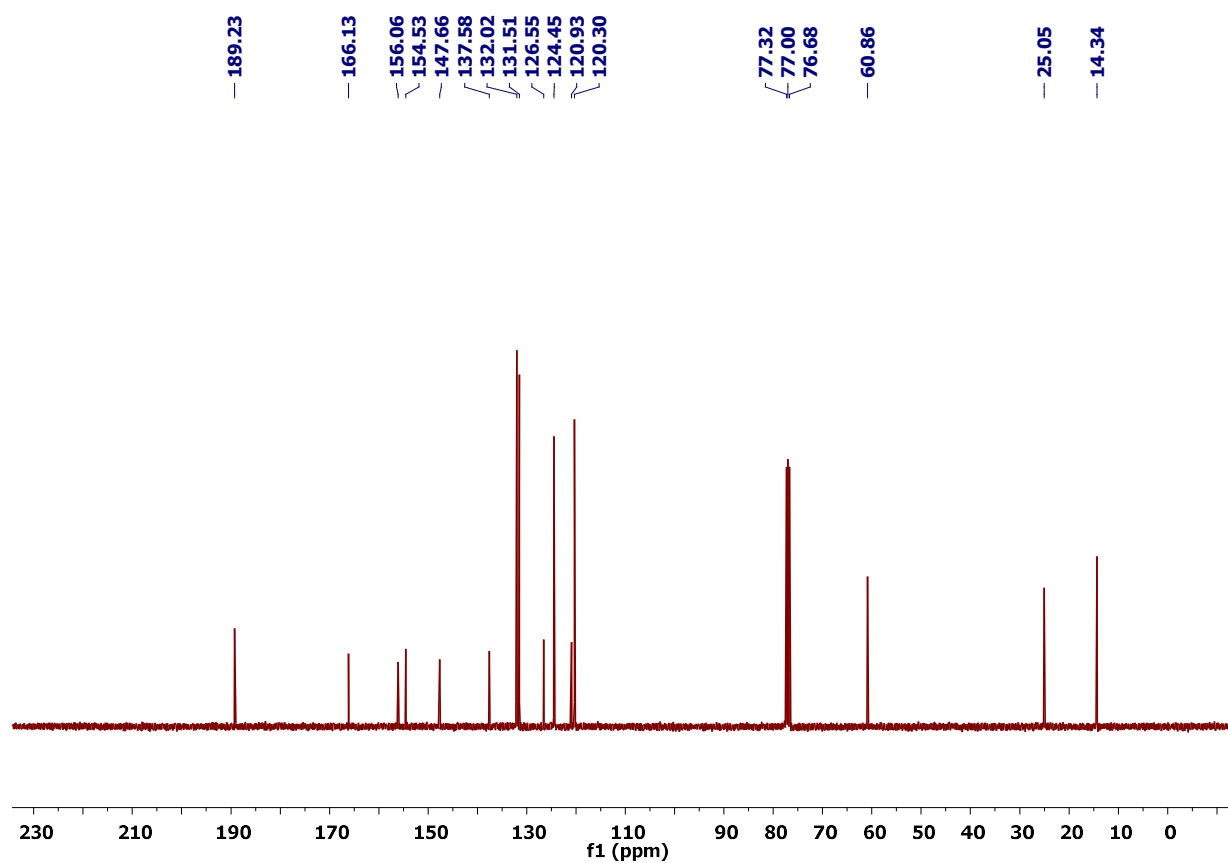

$^{13}\text{C}$  CRAPT NMR ( $\text{CDCl}_3$ ) spectrum of ethyl (Z)-4-((5-acetyl-3-(4-bromophenyl)-1,3,4-thiadiazol-2(3H)-ylidene)amino)benzoate

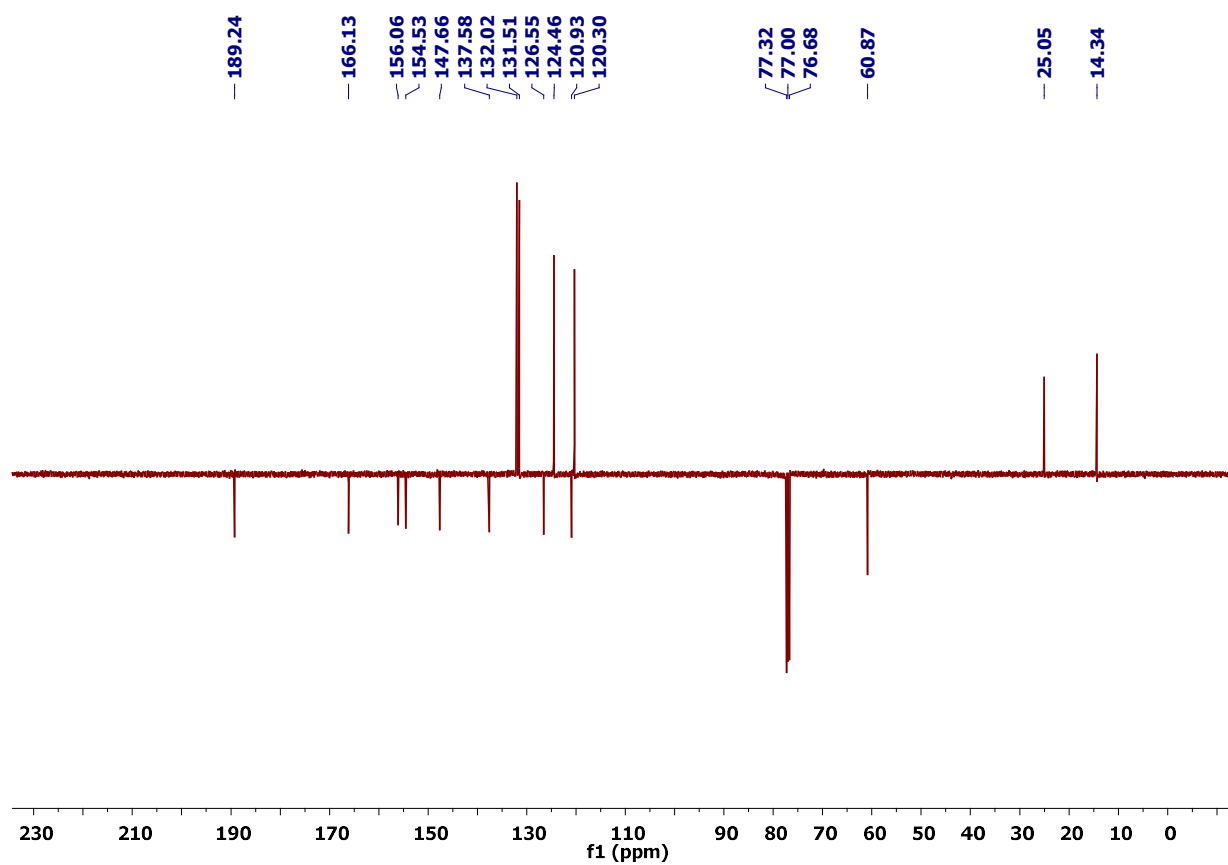

$^1\text{H}$ - $^1\text{H}$  gDQCOSY NMR ( $\text{CDCl}_3$ ) spectrum of ethyl (Z)-4-((5-acetyl-3-(4-bromophenyl)-1,3,4-thiadiazol-2(3H)-ylidene)amino)benzoate

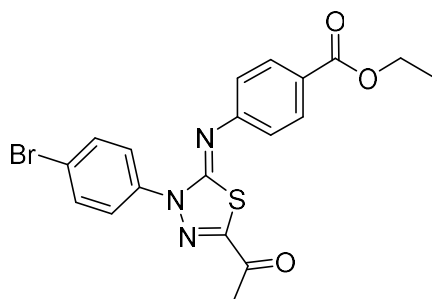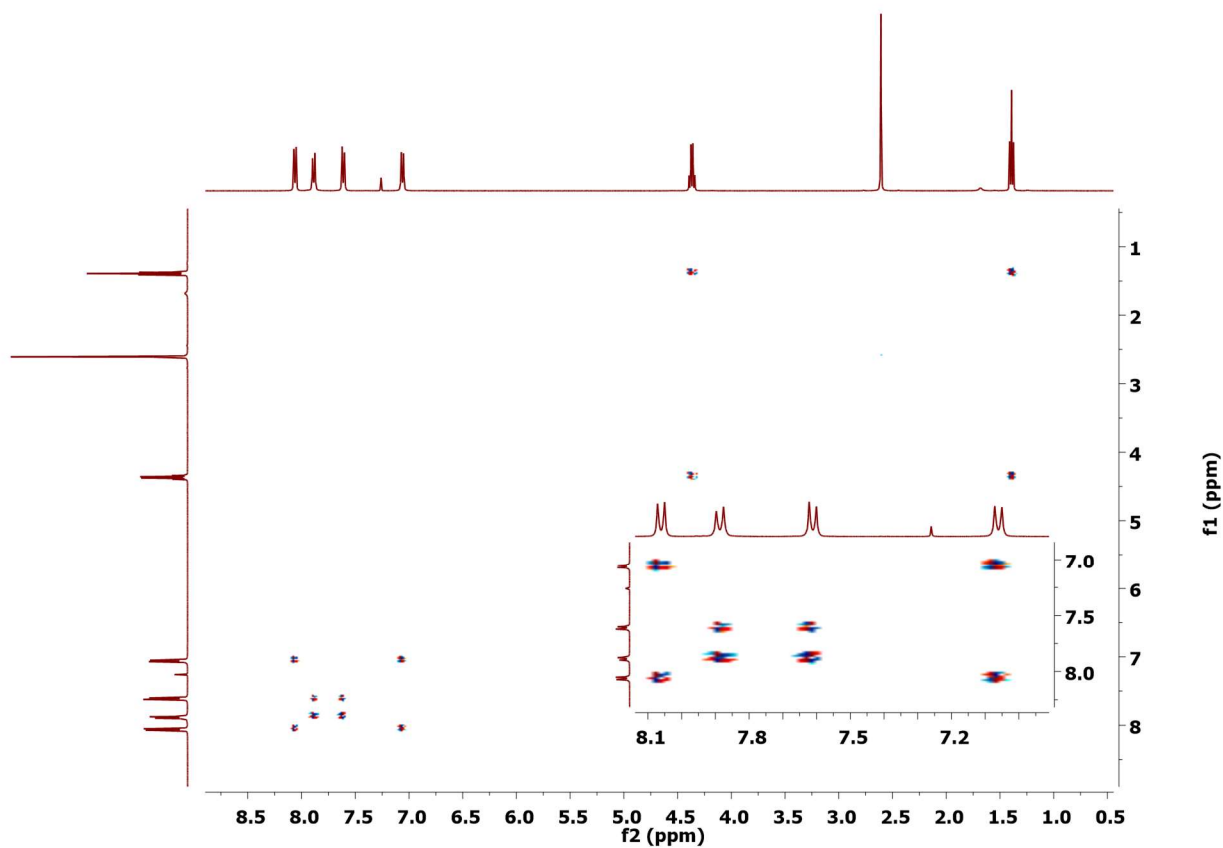

$^1\text{H}$ - $^{13}\text{C}$ -HSQC NMR ( $\text{CDCl}_3$ ) spectrum of ethyl (Z)-4-((5-acetyl-3-(4-bromophenyl)-1,3,4-thiadiazol-2(3H)-ylidene)amino)benzoate

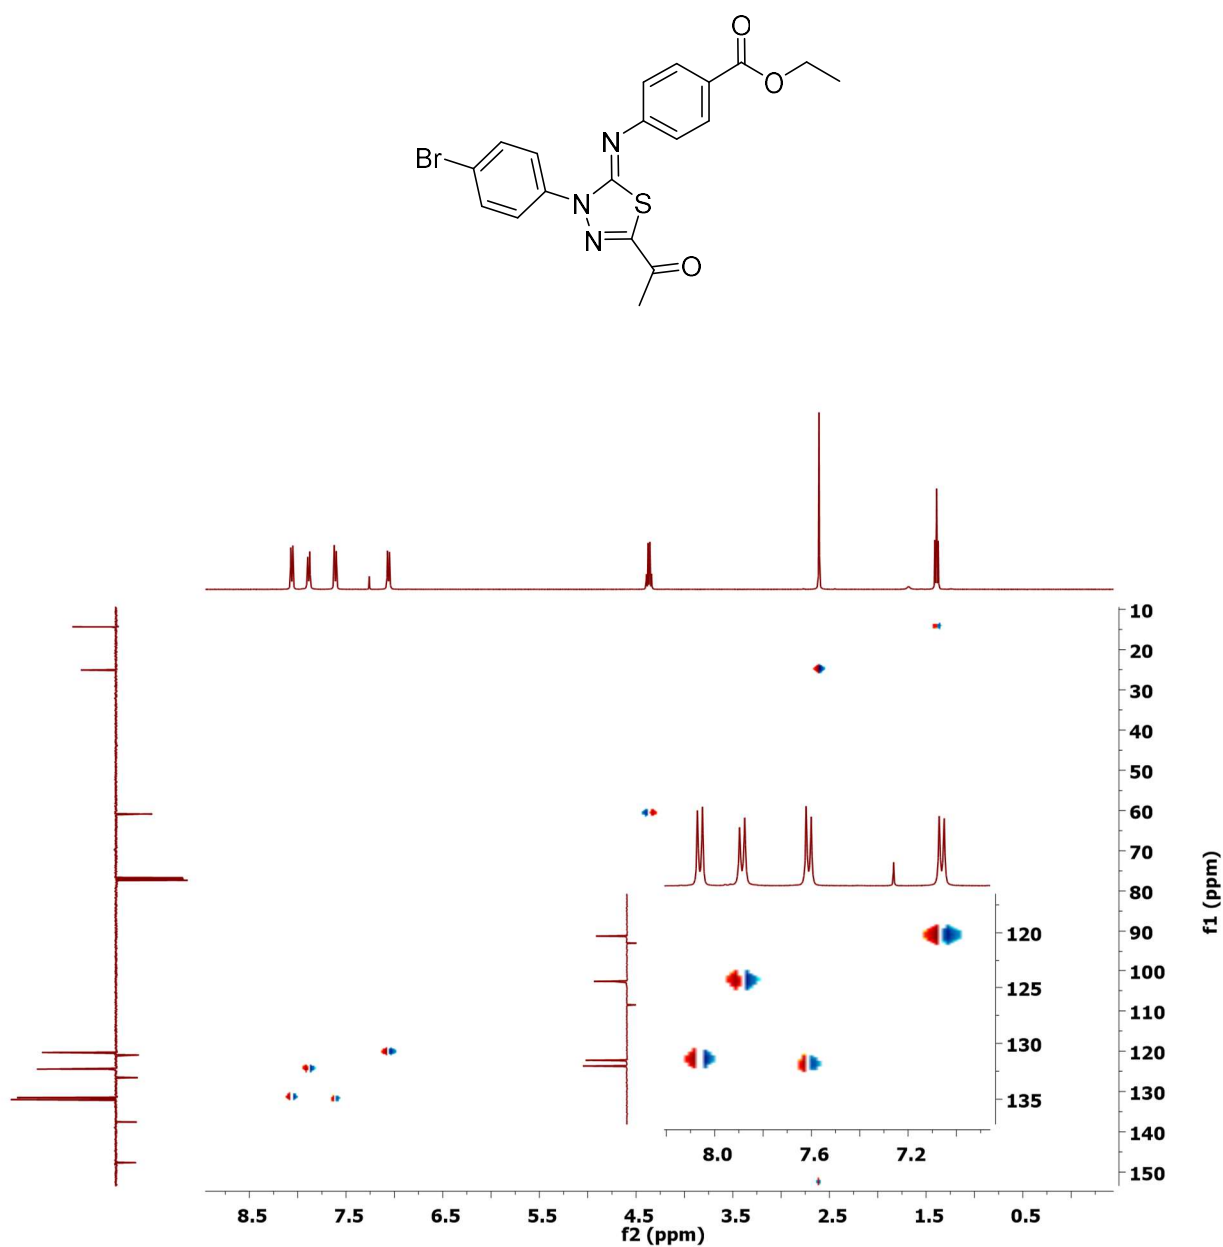

$^1\text{H}$ - $^{13}\text{C}$ -gHMBC NMR ( $\text{CDCl}_3$ ) spectrum of ethyl (Z)-4-((5-acetyl-3-(4-bromophenyl)-1,3,4-thiadiazol-2(3H)-ylidene)amino)benzoate

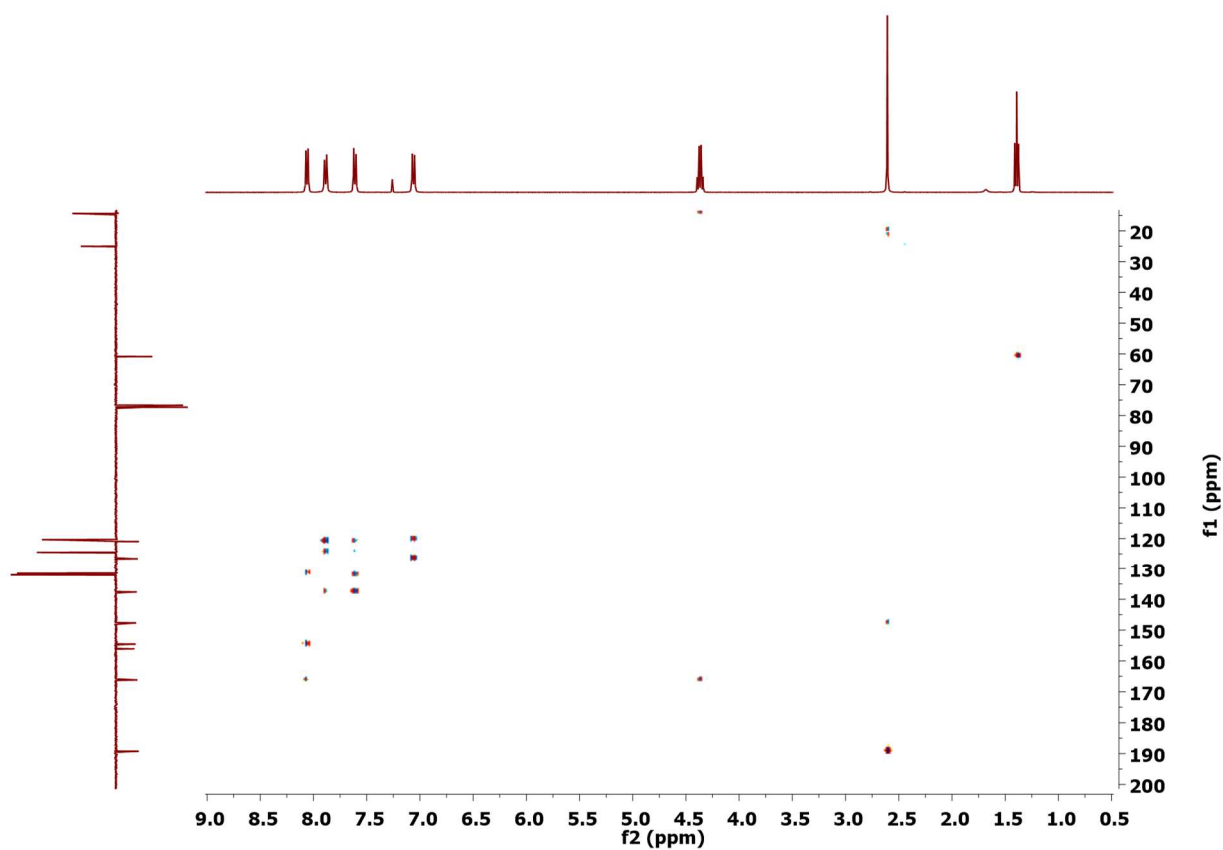

### Crystal data for (Z)-N-(2,3-difluorophenyl)-2-oxopropanehydrazonoyl chloride

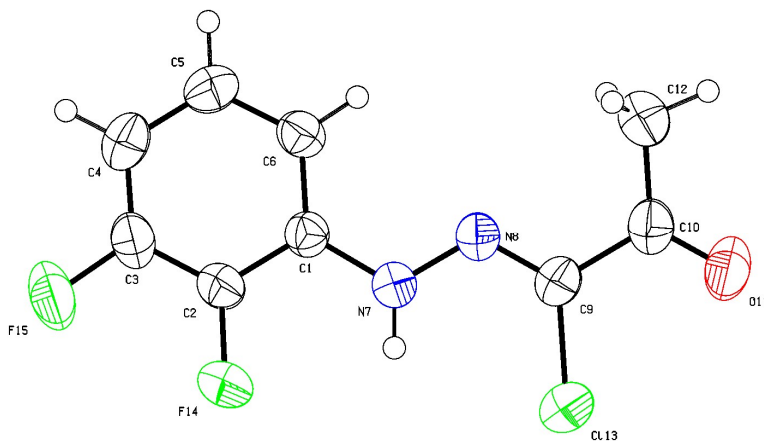

**Table 1 Crystal data and structure refinement for exp\_275\_auto.**

|                                    |                                                                 |
|------------------------------------|-----------------------------------------------------------------|
| Identification code                | exp_275_auto                                                    |
| Empirical formula                  | C <sub>9</sub> H <sub>7</sub> ClF <sub>2</sub> N <sub>2</sub> O |
| Formula weight                     | 232.62                                                          |
| Temperature/K                      | 297.00(10)                                                      |
| Crystal system                     | monoclinic                                                      |
| Space group                        | P2 <sub>1</sub> /n                                              |
| a/Å                                | 11.7982(4)                                                      |
| b/Å                                | 7.1366(2)                                                       |
| c/Å                                | 12.9116(5)                                                      |
| α/°                                | 90                                                              |
| β/°                                | 113.435(4)                                                      |
| γ/°                                | 90                                                              |
| Volume/Å <sup>3</sup>              | 997.47(7)                                                       |
| Z                                  | 4                                                               |
| ρ <sub>calc</sub> /cm <sup>3</sup> | 1.549                                                           |
| μ/mm <sup>-1</sup>                 | 3.489                                                           |
| F(000)                             | 472.0                                                           |
| Crystal size/mm <sup>3</sup>       | 0.6 × 0.6 × 0.4                                                 |
| Radiation                          | Cu Kα (λ = 1.54184)                                             |
| 2θ range for data collection/°     | 8.598 to 155.1                                                  |
| Index ranges                       | -14 ≤ h ≤ 13, -6 ≤ k ≤ 8, -16 ≤ l ≤ 15                          |
| Reflections collected              | 9692                                                            |
| Independent reflections            | 2036 [R <sub>int</sub> = 0.0546, R <sub>sigma</sub> = 0.0348]   |
| Data/restraints/parameters         | 2036/0/138                                                      |
| Goodness-of-fit on F <sup>2</sup>  | 1.057                                                           |
| Final R indexes [I ≥ 2σ (I)]       | R <sub>1</sub> = 0.0408, wR <sub>2</sub> = 0.1087               |

Final R indexes [all data]  $R_1 = 0.0484$ ,  $wR_2 = 0.1158$   
Largest diff. peak/hole / e Å<sup>-3</sup> 0.20/-0.24

**Table 2 Fractional Atomic Coordinates ( $\times 10^4$ ) and Equivalent Isotropic Displacement Parameters (Å<sup>2</sup> $\times 10^3$ ) for exp\_275\_auto.  $U_{eq}$  is defined as 1/3 of the trace of the orthogonalised  $U_{ij}$  tensor.**

| Atom | <i>x</i>    | <i>y</i>   | <i>z</i>    | $U_{eq}$ |
|------|-------------|------------|-------------|----------|
| Cl13 | 1709.2 (4)  | 5065.4 (8) | 5934.8 (5)  | 65.1 (2) |
| F14  | 2417.8 (10) | 7352 (2)   | 2818.5 (10) | 79.8 (5) |
| F15  | 3740.2 (13) | 8700 (2)   | 1710.1 (10) | 83.5 (5) |
| N8   | 3893.4 (13) | 6409 (2)   | 6171.2 (12) | 43.6 (3) |
| N7   | 3417.7 (13) | 6666 (2)   | 5058.4 (12) | 48.5 (4) |
| O11  | 3169.5 (15) | 4768 (3)   | 8362.9 (14) | 73.6 (5) |
| C1   | 4171.0 (14) | 7307 (2)   | 4535.2 (13) | 41.4 (4) |
| C9   | 3238.7 (16) | 5731 (3)   | 6656.3 (15) | 46.0 (4) |
| C6   | 5426.1 (15) | 7639 (3)   | 5100.6 (15) | 46.4 (4) |
| C2   | 3639.4 (15) | 7669 (3)   | 3385.5 (15) | 49.4 (4) |
| C10  | 3778.6 (18) | 5450 (3)   | 7898.9 (16) | 52.7 (5) |
| C5   | 6100.2 (16) | 8333 (3)   | 4521.6 (17) | 52.3 (5) |
| C4   | 5560.8 (18) | 8715 (3)   | 3381.1 (17) | 54.9 (5) |
| C3   | 4323.2 (18) | 8364 (3)   | 2831.8 (15) | 54.2 (5) |
| C12  | 5090 (2)    | 6051 (4)   | 8523.7 (18) | 70.8 (6) |

**Table 3 Anisotropic Displacement Parameters (Å<sup>2</sup> $\times 10^3$ ) for exp\_275\_auto. The Anisotropic displacement factor exponent takes the form:  $-2\pi^2[h^2a^{*2}U_{11}+2hka^*b^*U_{12}+...]$ .**

| Atom | $U_{11}$  | $U_{22}$   | $U_{33}$  | $U_{23}$ | $U_{13}$ | $U_{12}$  |
|------|-----------|------------|-----------|----------|----------|-----------|
| Cl13 | 50.4 (3)  | 84.0 (4)   | 64.1 (3)  | -1.4 (2) | 26.3 (2) | -11.5 (2) |
| F14  | 45.4 (6)  | 132.9 (13) | 48.6 (6)  | 11.0 (7) | 5.5 (5)  | -7.4 (7)  |
| F15  | 89.7 (9)  | 117.4 (12) | 44.5 (6)  | 21.7 (7) | 27.9 (6) | 13.2 (9)  |
| N8   | 47.0 (7)  | 45.7 (8)   | 40.3 (7)  | 1.9 (6)  | 19.5 (6) | 0.8 (6)   |
| N7   | 41.7 (7)  | 63.2 (10)  | 39.8 (7)  | 4.1 (7)  | 15.4 (6) | -3.3 (7)  |
| O11  | 74.0 (10) | 94.9 (12)  | 65.3 (9)  | 19.7 (8) | 41.8 (8) | 1.3 (8)   |
| C1   | 42.2 (8)  | 43.6 (9)   | 39.8 (8)  | 0.7 (7)  | 17.7 (6) | 2.3 (7)   |
| C9   | 46.3 (8)  | 47.1 (10)  | 49.5 (9)  | 0.8 (8)  | 24.1 (7) | 0.4 (8)   |
| C6   | 43.2 (8)  | 51.2 (10)  | 41.2 (8)  | 0.2 (7)  | 13.2 (7) | 4.1 (8)   |
| C2   | 41.2 (8)  | 62.2 (11)  | 40.5 (8)  | 3.7 (8)  | 11.8 (7) | 3.2 (8)   |
| C10  | 59.6 (10) | 55.7 (11)  | 49.2 (10) | 5.7 (8)  | 28.4 (8) | 6.3 (9)   |
| C5   | 42.3 (8)  | 54.5 (11)  | 62.6 (11) | -3.3 (9) | 23.5 (8) | -0.1 (8)  |
| C4   | 60.0 (10) | 54.0 (11)  | 63.0 (11) | 3.7 (9)  | 37.5 (9) | 3.4 (9)   |
| C3   | 61.9 (10) | 62.2 (12)  | 41.6 (9)  | 8.6 (8)  | 24.0 (8) | 9.8 (9)   |



**Table 3 Anisotropic Displacement Parameters ( $\text{\AA}^2 \times 10^3$ ) for exp\_275\_auto. The Anisotropic displacement factor exponent takes the form:  $-2\pi^2[h^2a^{*2}U_{11}+2hka^*b^*U_{12}+\dots]$ .**

| Atom | U <sub>11</sub> | U <sub>22</sub> | U <sub>33</sub> | U <sub>23</sub> | U <sub>13</sub> | U <sub>12</sub> |
|------|-----------------|-----------------|-----------------|-----------------|-----------------|-----------------|
| Cl2  | 62.2 (11)       | 99.6 (19)       | 48.6 (10)       | 3.0 (11)        | 19.9 (9)        | -2.8 (12)       |

**Table 4 Bond Lengths for exp\_275\_auto.**

| Atom | Atom | Length/ $\text{\AA}$ | Atom | Atom | Length/ $\text{\AA}$ |
|------|------|----------------------|------|------|----------------------|
| Cl13 | C9   | 1.7357 (18)          | C1   | C2   | 1.387 (2)            |
| F14  | C2   | 1.3509 (19)          | C9   | C10  | 1.486 (3)            |
| F15  | C3   | 1.355 (2)            | C6   | C5   | 1.382 (3)            |
| N8   | N7   | 1.331 (2)            | C2   | C3   | 1.366 (3)            |
| N8   | C9   | 1.268 (2)            | C10  | C12  | 1.495 (3)            |
| N7   | C1   | 1.390 (2)            | C5   | C4   | 1.379 (3)            |
| O11  | C10  | 1.206 (2)            | C4   | C3   | 1.369 (3)            |
| C1   | C6   | 1.386 (2)            |      |      |                      |

**Table 5 Bond Angles for exp\_275\_auto.**

| Atom | Atom | Atom | Angle/ $^\circ$ | Atom | Atom | Atom | Angle/ $^\circ$ |
|------|------|------|-----------------|------|------|------|-----------------|
| C9   | N8   | N7   | 120.50 (15)     | F14  | C2   | C3   | 120.12 (16)     |
| N8   | N7   | C1   | 119.55 (14)     | C3   | C2   | C1   | 121.19 (16)     |
| C6   | C1   | N7   | 123.77 (15)     | O11  | C10  | C9   | 120.44 (18)     |
| C6   | C1   | C2   | 117.73 (15)     | O11  | C10  | C12  | 122.75 (19)     |
| C2   | C1   | N7   | 118.49 (14)     | C9   | C10  | C12  | 116.81 (17)     |
| N8   | C9   | Cl13 | 123.16 (14)     | C4   | C5   | C6   | 121.88 (17)     |
| N8   | C9   | C10  | 120.07 (16)     | C3   | C4   | C5   | 117.45 (17)     |
| C10  | C9   | Cl13 | 116.77 (13)     | F15  | C3   | C2   | 117.98 (17)     |
| C5   | C6   | C1   | 120.04 (16)     | F15  | C3   | C4   | 120.31 (17)     |
| F14  | C2   | C1   | 118.67 (15)     | C2   | C3   | C4   | 121.70 (17)     |

**Table 6 Torsion Angles for exp\_275\_auto.**

| A    | B  | C   | D   | Angle/ $^\circ$ | A  | B  | C  | D   | Angle/ $^\circ$ |
|------|----|-----|-----|-----------------|----|----|----|-----|-----------------|
| Cl13 | C9 | C10 | O11 | 0.9 (3)         | N7 | C1 | C2 | C3  | 177.65 (18)     |
| Cl13 | C9 | C10 | C12 | 179.06 (16)     | C1 | C6 | C5 | C4  | 0.1 (3)         |
| F14  | C2 | C3  | F15 | -0.6 (3)        | C1 | C2 | C3 | F15 | 179.41 (18)     |
| F14  | C2 | C3  | C4  | 179.47 (19)     | C1 | C2 | C3 | C4  | 0.6 (3)         |

**Table 6 Torsion Angles for exp\_275\_auto.**

| A  | B        | C   | D | Angle/°    | A         | B | C | D | Angle/°    |
|----|----------|-----|---|------------|-----------|---|---|---|------------|
| N8 | N7C1     | C6  |   | 2.6(3)     | C9N8N7C1  |   |   |   | 176.19(17) |
| N8 | N7C1     | C2  |   | 176.24(17) | C6C1C2F14 |   |   |   | 179.95(18) |
| N8 | C9C10O11 |     |   | 178.38(19) | C6C1C2C3  |   |   |   | -1.2(3)    |
| N8 | C9C10C12 |     |   | 1.6(3)     | C6C5C4C3  |   |   |   | -0.7(3)    |
| N7 | N8C9     | C13 |   | 0.8(3)     | C2C1C6C5  |   |   |   | 0.8(3)     |
| N7 | N8C9     | C10 |   | 180.00(17) | C5C4C3F15 |   |   |   | 179.63(19) |
| N7 | C1C6     | C5  |   | 177.96(17) | C5C4C3C2  |   |   |   | 0.3(3)     |
| N7 | C1C2     | F14 |   | -1.2(3)    |           |   |   |   |            |

**Table 7 Hydrogen Atom Coordinates ( $\text{\AA} \times 10^4$ ) and Isotropic Displacement Parameters ( $\text{\AA}^2 \times 10^3$ ) for exp\_275\_auto.**

| Atom | x       | y       | z       | U(eq) |
|------|---------|---------|---------|-------|
| H7   | 2649.58 | 6436.85 | 4665.66 | 58    |
| H6   | 5814.52 | 7396.07 | 5869.98 | 56    |
| H5   | 6941.56 | 8547.22 | 4911.95 | 63    |
| H4   | 6020.23 | 9194.05 | 2999.97 | 66    |
| H12A | 5158.84 | 7372.46 | 8421.82 | 106   |
| H12B | 5610.91 | 5383.07 | 8237.65 | 106   |
| H12C | 5342.84 | 5783.46 | 9312.7  | 106   |

## Crystal data for (4-ethoxyphenyl)carbamoithioyl cyanide

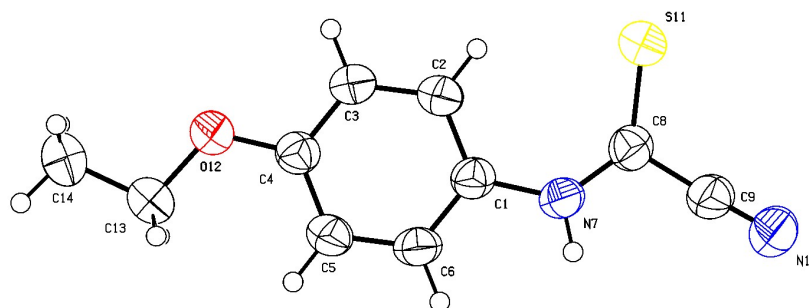

**Table 1 Crystal data and structure refinement for exp\_286\_auto.**

|                                      |                                                               |
|--------------------------------------|---------------------------------------------------------------|
| Identification code                  | exp_286_auto                                                  |
| Empirical formula                    | C <sub>10</sub> H <sub>10</sub> N <sub>2</sub> OS             |
| Formula weight                       | 206.26                                                        |
| Temperature/K                        | 297.00(10)                                                    |
| Crystal system                       | orthorhombic                                                  |
| Space group                          | P2 <sub>1</sub> 2 <sub>1</sub> 2 <sub>1</sub>                 |
| a/Å                                  | 4.0279(2)                                                     |
| b/Å                                  | 15.3918(8)                                                    |
| c/Å                                  | 16.6883(8)                                                    |
| α/°                                  | 90                                                            |
| β/°                                  | 90                                                            |
| γ/°                                  | 90                                                            |
| Volume/Å <sup>3</sup>                | 1034.63(10)                                                   |
| Z                                    | 4                                                             |
| ρ <sub>calc</sub> /g/cm <sup>3</sup> | 1.324                                                         |
| μ/mm <sup>-1</sup>                   | 2.523                                                         |
| F(000)                               | 432.0                                                         |
| Crystal size/mm <sup>3</sup>         | 0.5 × 0.3 × 0.2                                               |
| Radiation                            | Cu Kα (λ = 1.54184)                                           |
| 2θ range for data collection/°       | 7.814 to 153.874                                              |
| Index ranges                         | -4 ≤ h ≤ 3, -18 ≤ k ≤ 18, -21 ≤ l ≤ 19                        |
| Reflections collected                | 5226                                                          |
| Independent reflections              | 1818 [R <sub>int</sub> = 0.0321, R <sub>sigma</sub> = 0.0308] |
| Data/restraints/parameters           | 1818/0/130                                                    |
| Goodness-of-fit on F <sup>2</sup>    | 1.096                                                         |
| Final R indexes [I ≥ 2σ (I)]         | R <sub>1</sub> = 0.0352, wR <sub>2</sub> = 0.0848             |

Final R indexes [all data]  $R_1 = 0.0441$ ,  $wR_2 = 0.0892$   
 Largest diff. peak/hole / e Å<sup>-3</sup> 0.14/-0.16  
 Flack parameter 0.28(3)

**Table 2 Fractional Atomic Coordinates ( $\times 10^4$ ) and Equivalent Isotropic Displacement Parameters ( $\text{\AA}^2 \times 10^3$ ) for exp\_286\_auto.  $U_{eq}$  is defined as 1/3 of the trace of the orthogonalised  $U_{ij}$  tensor.**

| Atom | x          | y           | z           | U(eq)     |
|------|------------|-------------|-------------|-----------|
| S11  | 844 (3)    | 5363.2 (5)  | 6531.9 (5)  | 74.7 (3)  |
| O12  | 8439 (6)   | 2806.5 (13) | 3701.9 (11) | 59.5 (6)  |
| N7   | 3145 (7)   | 5802.8 (14) | 5050.7 (14) | 54.0 (7)  |
| C4   | 7215 (8)   | 3571.0 (18) | 4008.8 (17) | 48.7 (7)  |
| C1   | 4541 (8)   | 5025.0 (16) | 4739.4 (15) | 47.7 (7)  |
| N10  | -520 (9)   | 7548.4 (17) | 5861.1 (17) | 79.6 (10) |
| C6   | 5954 (9)   | 5080.3 (17) | 3990.1 (16) | 55.4 (7)  |
| C8   | 1653 (8)   | 5971.0 (18) | 5747.3 (17) | 52.5 (8)  |
| C5   | 7327 (8)   | 4361.3 (18) | 3619.0 (17) | 54.4 (8)  |
| C3   | 5838 (9)   | 3515.3 (17) | 4761.7 (17) | 55.2 (7)  |
| C2   | 4491 (9)   | 4231.4 (17) | 5133.4 (17) | 55.3 (8)  |
| C13  | 9836 (9)   | 2808 (2)    | 2915.4 (18) | 60.9 (9)  |
| C9   | 490 (10)   | 6868 (2)    | 5800.4 (18) | 60.4 (9)  |
| C14  | 10876 (12) | 1892 (2)    | 2741 (2)    | 80.8 (11) |

**Table 3 Anisotropic Displacement Parameters ( $\text{\AA}^2 \times 10^3$ ) for exp\_286\_auto. The Anisotropic displacement factor exponent takes the form:  $-2\pi^2[h^2a^{*2}U_{11}+2hka^*b^*U_{12}+...]$ .**

| Atom | U <sub>11</sub> | U <sub>22</sub> | U <sub>33</sub> | U <sub>23</sub> | U <sub>13</sub> | U <sub>12</sub> |
|------|-----------------|-----------------|-----------------|-----------------|-----------------|-----------------|
| S11  | 106.3 (8)       | 61.4 (5)        | 56.4 (5)        | 6.8 (4)         | 19.9 (5)        | 9.9 (5)         |
| O12  | 76.9 (15)       | 54.2 (11)       | 47.5 (11)       | 2.1 (8)         | 7.2 (11)        | 8.9 (12)        |
| N7   | 73.4 (18)       | 42.5 (12)       | 46.1 (13)       | 3.4 (10)        | -0.9 (13)       | -0.8 (12)       |
| C4   | 52.3 (18)       | 50.1 (14)       | 43.7 (14)       | 0.9 (13)        | -3.5 (14)       | -1.0 (14)       |
| C1   | 53.9 (19)       | 44.2 (13)       | 45.0 (13)       | 0.8 (11)        | -3.7 (14)       | -4.2 (14)       |
| N10  | 115 (3)         | 60.3 (16)       | 63.5 (16)       | 1.0 (14)        | 1.2 (19)        | 17.2 (18)       |
| C6   | 73 (2)          | 46.8 (14)       | 46.0 (14)       | 9.3 (12)        | -1.2 (18)       | -3.2 (16)       |
| C8   | 60 (2)          | 49.2 (14)       | 48.4 (15)       | -3.2 (12)       | -5.9 (15)       | 1.3 (14)        |
| C5   | 67 (2)          | 56.1 (16)       | 40.3 (14)       | 3.3 (12)        | 1.9 (15)        | -1.4 (15)       |
| C3   | 68 (2)          | 45.9 (14)       | 51.9 (15)       | 7.7 (13)        | 5.7 (17)        | -1.2 (16)       |
| C2   | 70 (2)          | 51.7 (15)       | 44.4 (14)       | 4.9 (12)        | 6.5 (15)        | -1.8 (16)       |
| C13  | 68 (2)          | 65.0 (17)       | 49.4 (16)       | 0.4 (14)        | 8.4 (16)        | 1.2 (17)        |
| C9   | 81 (2)          | 53.1 (16)       | 47.6 (15)       | 1.6 (13)        | -3.8 (17)       | 1.2 (17)        |
| C14  | 96 (3)          | 73 (2)          | 74 (2)          | -3.7 (18)       | 29 (2)          | 14 (2)          |

**Table 4 Bond Lengths for exp\_286\_auto.**

| Atom | Atom | Length/Å  | Atom | Atom | Length/Å  |
|------|------|-----------|------|------|-----------|
| S11  | C8   | 1.642 (3) | C1   | C6   | 1.377 (4) |
| O12  | C4   | 1.375 (3) | C1   | C2   | 1.387 (3) |
| O12  | C13  | 1.428 (3) | N10  | C9   | 1.128 (4) |
| N7   | C1   | 1.421 (3) | C6   | C5   | 1.384 (4) |
| N7   | C8   | 1.334 (4) | C8   | C9   | 1.461 (4) |
| C4   | C5   | 1.380 (4) | C3   | C2   | 1.376 (4) |
| C4   | C3   | 1.376 (4) | C13  | C14  | 1.499 (4) |

**Table 5 Bond Angles for exp\_286\_auto.**

| Atom | Atom | Atom | Angle/°   | Atom | Atom | Atom | Angle/°   |
|------|------|------|-----------|------|------|------|-----------|
| C4   | O12  | C13  | 118.8 (2) | N7   | C8   | S11  | 132.4 (2) |
| C8   | N7   | C1   | 131.3 (2) | N7   | C8   | C9   | 112.4 (2) |
| O12  | C4   | C5   | 124.5 (3) | C9   | C8   | S11  | 115.3 (2) |
| O12  | C4   | C3   | 115.6 (2) | C4   | C5   | C6   | 118.8 (3) |
| C3   | C4   | C5   | 119.9 (3) | C2   | C3   | C4   | 121.4 (3) |
| C6   | C1   | N7   | 116.3 (2) | C3   | C2   | C1   | 119.1 (3) |
| C6   | C1   | C2   | 119.4 (3) | O12  | C13  | C14  | 106.6 (3) |
| C2   | C1   | N7   | 124.2 (3) | N10  | C9   | C8   | 177.0 (4) |
| C1   | C6   | C5   | 121.5 (2) |      |      |      |           |

**Table 6 Torsion Angles for exp\_286\_auto.**

| A   | B   | C   | D   | Angle/°    | A   | B   | C  | D  | Angle/°    |
|-----|-----|-----|-----|------------|-----|-----|----|----|------------|
| O12 | C4  | C5  | C6  | 179.0 (3)  | C6  | C1  | C2 | C3 | -0.5 (5)   |
| O12 | C4  | C3  | C2  | -179.3 (3) | C8  | N7  | C1 | C6 | -179.1 (3) |
| N7  | C1  | C6  | C5  | -178.6 (3) | C8  | N7  | C1 | C2 | 2.3 (5)    |
| N7  | C1  | C2  | C3  | 178.1 (3)  | C5  | C4  | C3 | C2 | 1.4 (5)    |
| C4  | O12 | C13 | C14 | -178.8 (3) | C3  | C4  | C5 | C6 | -1.8 (5)   |
| C4  | C3  | C2  | C1  | -0.2 (5)   | C2  | C1  | C6 | C5 | 0.1 (5)    |
| C1  | N7  | C8  | S11 | 0.8 (5)    | C13 | O12 | C4 | C5 | -2.2 (5)   |
| C1  | N7  | C8  | C9  | -178.0 (3) | C13 | O12 | C4 | C3 | 178.5 (3)  |
| C1  | C6  | C5  | C4  | 1.1 (5)    |     |     |    |    |            |

**Table 7 Hydrogen Atom Coordinates ( $\text{\AA}\times 10^4$ ) and Isotropic Displacement Parameters ( $\text{\AA}^2\times 10^3$ ) for exp\_286\_auto.**

| <b>Atom</b> | <b><i>x</i></b> | <b><i>y</i></b> | <b><i>z</i></b> | <b>U(eq)</b> |
|-------------|-----------------|-----------------|-----------------|--------------|
| H7          | 3287.57         | 6242.39         | 4734.46         | 65           |
| H6          | 5987.4          | 5613.13         | 3727.37         | 67           |
| H5          | 8307.11         | 4409.56         | 3116.35         | 65           |
| H3          | 5816.67         | 2982.64         | 5024.74         | 66           |
| H2          | 3560.24         | 4183.98         | 5641.54         | 66           |
| H13A        | 11736.45        | 3194.72         | 2892.38         | 73           |
| H13B        | 8206.41         | 3002.04         | 2526.58         | 73           |
| H14A        | 11830.21        | 1863.04         | 2214.79         | 121          |
| H14B        | 8974.37         | 1517.49         | 2767.73         | 121          |
| H14C        | 12489.7         | 1709.87         | 3129.75         | 121          |

**Crystal data for (Z)-1-(5-((3-fluorophenyl)imino)-4-(4-iodophenyl)-4,5-dihydro-1,3,4-thiadiazol-2-yl)ethan-1-one**

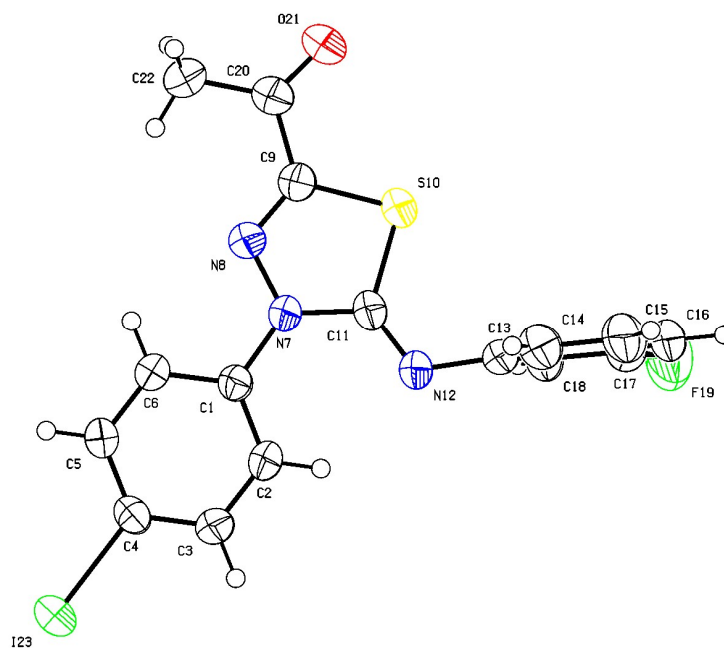

**Table 1 Crystal data and structure refinement for exp\_256\_auto “Deposition Number 2178549”.**

|                                    |                                                     |
|------------------------------------|-----------------------------------------------------|
| Identification code                | exp_256_auto                                        |
| Empirical formula                  | C <sub>16</sub> H <sub>11</sub> FIN <sub>3</sub> OS |
| Formula weight                     | 439.24                                              |
| Temperature/K                      | 297.00(10)                                          |
| Crystal system                     | monoclinic                                          |
| Space group                        | P2 <sub>1</sub> /c                                  |
| a/Å                                | 11.2549(3)                                          |
| b/Å                                | 19.3773(4)                                          |
| c/Å                                | 7.6592(2)                                           |
| α/°                                | 90                                                  |
| β/°                                | 102.691(3)                                          |
| γ/°                                | 90                                                  |
| Volume/Å <sup>3</sup>              | 1629.58(7)                                          |
| Z                                  | 4                                                   |
| ρ <sub>calc</sub> /cm <sup>3</sup> | 1.790                                               |
| μ/mm <sup>-1</sup>                 | 16.799                                              |
| F(000)                             | 856.0                                               |
| Crystal size/mm <sup>3</sup>       | 0.8 × 0.5 × 0.5                                     |

|                                                  |                                                                  |
|--------------------------------------------------|------------------------------------------------------------------|
| Radiation                                        | Cu K $\alpha$ ( $\lambda$ = 1.54184)                             |
| 2 $\Theta$ range for data collection/ $^{\circ}$ | 8.052 to 155.282                                                 |
| Index ranges                                     | $-13 \leq h \leq 12$ , $-24 \leq k \leq 16$ , $-9 \leq l \leq 9$ |
| Reflections collected                            | 14346                                                            |
| Independent reflections                          | 3262 [ $R_{\text{int}} = 0.0593$ , $R_{\text{sigma}} = 0.0439$ ] |
| Data/restraints/parameters                       | 3262/0/210                                                       |
| Goodness-of-fit on $F^2$                         | 1.060                                                            |
| Final R indexes [ $I \geq 2\sigma(I)$ ]          | $R_1 = 0.0383$ , $wR_2 = 0.1031$                                 |
| Final R indexes [all data]                       | $R_1 = 0.0434$ , $wR_2 = 0.1077$                                 |
| Largest diff. peak/hole / e $\text{\AA}^{-3}$    | 0.78/-1.06                                                       |

**Table 2 Fractional Atomic Coordinates ( $\times 10^4$ ) and Equivalent Isotropic Displacement Parameters ( $\text{\AA}^2 \times 10^3$ ) for exp\_256\_auto.  $U_{\text{eq}}$  is defined as 1/3 of the trace of the orthogonalised  $U_{ij}$  tensor.**

| Atom | $x$       | $y$        | $z$        | $U(\text{eq})$ |
|------|-----------|------------|------------|----------------|
| I23  | 1568.4(2) | 366.8(2)   | 8208.9(4)  | 61.45(15)      |
| S10  | 5372.6(8) | 4305.7(5)  | 7366.3(15) | 56.1(3)        |
| N7   | 4073(2)   | 3250.3(15) | 7805(4)    | 44.9(7)        |
| N8   | 3370(3)   | 3810.0(15) | 7949(4)    | 47.1(7)        |
| O21  | 3963(3)   | 5569.4(17) | 7787(6)    | 82.8(11)       |
| F19  | 8868(3)   | 3465(2)    | 3856(5)    | 108.3(11)      |
| N12  | 6065(3)   | 2958.3(17) | 7516(5)    | 53.7(8)        |
| C1   | 3555(3)   | 2585.6(17) | 7940(4)    | 40.1(7)        |
| C4   | 2419(3)   | 1327.0(19) | 8105(5)    | 46.5(8)        |
| C2   | 4112(3)   | 1978.9(19) | 7596(5)    | 49.7(8)        |
| C3   | 3556(3)   | 1354.3(19) | 7691(6)    | 50.5(8)        |
| C6   | 2420(3)   | 2554.6(19) | 8392(5)    | 49.6(8)        |
| C11  | 5251(3)   | 3399(2)    | 7560(5)    | 45.9(8)        |
| C5   | 1859(3)   | 1927(2)    | 8460(5)    | 51.8(9)        |
| C9   | 3912(3)   | 4375(2)    | 7773(5)    | 48.6(8)        |
| C13  | 7226(3)   | 3190.6(19) | 7326(6)    | 50.2(9)        |
| C18  | 7468(4)   | 3253(2)    | 5644(6)    | 59.5(10)       |
| C20  | 3378(4)   | 5064(2)    | 7943(6)    | 56.4(9)        |
| C17  | 8619(4)   | 3436(2)    | 5499(7)    | 64.7(11)       |
| C16  | 9540(4)   | 3575(2)    | 6923(7)    | 67.6(12)       |
| C22  | 2138(4)   | 5084(2)    | 8332(7)    | 64.3(11)       |
| C14  | 8138(4)   | 3320(2)    | 8814(7)    | 65.7(11)       |
| C15  | 9283(4)   | 3516(3)    | 8584(8)    | 75.9(14)       |

**Table 3 Anisotropic Displacement Parameters ( $\text{\AA}^2 \times 10^3$ ) for exp\_256\_auto. The Anisotropic displacement factor exponent takes the form:  $-2\pi^2[h^2a^{*2}U_{11}+2hka^*b^*U_{12}+\dots]$ .**

| Atom | $U_{11}$ | $U_{22}$ | $U_{33}$ | $U_{23}$ | $U_{13}$ | $U_{12}$ |
|------|----------|----------|----------|----------|----------|----------|
|------|----------|----------|----------|----------|----------|----------|



|     |          |           |          |          |           |            |
|-----|----------|-----------|----------|----------|-----------|------------|
| I23 | 57.4(2)  | 42.87(19) | 87.1(2)  | 0.48(11) | 22.50(15) | -11.59(10) |
| S10 | 39.4(4)  | 42.0(5)   | 88.9(7)  | 1.3(4)   | 18.5(4)   | -6.1(4)    |
| N7  | 31.6(13) | 38.2(15)  | 66.7(18) | 3.5(13)  | 14.5(12)  | 1.6(12)    |
| N8  | 39.0(14) | 37.5(15)  | 65.2(18) | 0.8(13)  | 12.1(13)  | 1.2(12)    |
| O21 | 65(2)    | 41.3(15)  | 148(3)   | -5.2(19) | 36(2)     | -11.2(15)  |
| F19 | 86(2)    | 126(3)    | 126(3)   | 18(2)    | 52(2)     | -9(2)      |
| N12 | 32.3(14) | 41.7(16)  | 88(2)    | 1.3(16)  | 16.4(15)  | -1.9(13)   |
| C1  | 31.6(15) | 37.2(16)  | 50.1(17) | 3.6(13)  | 5.9(13)   | 0.4(13)    |
| C4  | 42.1(17) | 38.6(17)  | 59(2)    | 3.8(15)  | 11.6(15)  | -7.0(15)   |
| C2  | 32.6(16) | 46(2)     | 72(2)    | 3.5(17)  | 14.7(15)  | 4.0(15)    |
| C3  | 40.3(18) | 38.3(18)  | 73(2)    | -0.1(17) | 11.8(16)  | 4.1(15)    |
| C6  | 38.5(17) | 39.9(18)  | 74(2)    | -0.1(17) | 20.6(16)  | 2.6(15)    |
| C11 | 34.2(16) | 44.4(18)  | 59(2)    | 0.9(15)  | 11.0(14)  | -6.1(15)   |
| C5  | 40.5(17) | 45(2)     | 75(2)    | -0.7(17) | 24.3(17)  | -4.3(16)   |
| C9  | 39.3(17) | 41.7(19)  | 64(2)    | 0.0(16)  | 9.7(16)   | 0.2(15)    |
| C13 | 36.7(17) | 35.8(18)  | 79(2)    | -3.4(16) | 14.4(17)  | 0.4(14)    |
| C18 | 40.6(18) | 56(2)     | 81(3)    | 1(2)     | 10.8(18)  | -7.2(18)   |
| C20 | 52(2)    | 41(2)     | 78(3)    | -4.3(18) | 15.0(18)  | -3.5(18)   |
| C17 | 53(2)    | 48(2)     | 100(3)   | 1(2)     | 31(2)     | 1.0(19)    |
| C16 | 38.1(19) | 50(2)     | 117(4)   | -3(2)    | 21(2)     | -6.6(18)   |
| C22 | 59(2)    | 47(2)     | 93(3)    | -9(2)    | 31(2)     | 4(2)       |
| C14 | 53(2)    | 59(3)     | 83(3)    | -7(2)    | 11(2)     | -7(2)      |
| C15 | 41(2)    | 69(3)     | 109(4)   | -8(3)    | -4(2)     | -11(2)     |

**Table 4 Bond Lengths for exp\_256\_auto.**

| Atom | Atom | Length/Å | Atom | Atom | Length/Å |
|------|------|----------|------|------|----------|
| I23  | C4   | 2.102(3) | C4   | C3   | 1.386(5) |
| S10  | C11  | 1.771(4) | C4   | C5   | 1.377(5) |
| S10  | C9   | 1.744(4) | C2   | C3   | 1.372(5) |
| N7   | N8   | 1.361(4) | C6   | C5   | 1.377(5) |
| N7   | C1   | 1.427(4) | C9   | C20  | 1.482(5) |
| N7   | C11  | 1.409(4) | C13  | C18  | 1.379(6) |
| N8   | C9   | 1.275(5) | C13  | C14  | 1.379(6) |
| O21  | C20  | 1.200(5) | C18  | C17  | 1.372(6) |
| F19  | C17  | 1.349(6) | C20  | C22  | 1.490(6) |
| N12  | C11  | 1.258(5) | C17  | C16  | 1.356(7) |
| N12  | C13  | 1.419(5) | C16  | C15  | 1.370(8) |
| C1   | C2   | 1.385(5) | C14  | C15  | 1.391(7) |
| C1   | C6   | 1.395(5) |      |      |          |

**Table 5 Bond Angles for exp\_256\_auto.**

| Atom | Atom | Atom | Angle/° | Atom | Atom | Atom | Angle/° |
|------|------|------|---------|------|------|------|---------|
|------|------|------|---------|------|------|------|---------|

|     |     |     |           |     |     |     |          |
|-----|-----|-----|-----------|-----|-----|-----|----------|
| C9  | S10 | C11 | 88.21(17) | C4  | C5  | C6  | 120.3(3) |
| N8  | N7  | C1  | 117.3(3)  | N8  | C9  | S10 | 116.3(3) |
| N8  | N7  | C11 | 115.4(3)  | N8  | C9  | C20 | 123.5(3) |
| C11 | N7  | C1  | 127.3(3)  | C20 | C9  | S10 | 120.1(3) |
| C9  | N8  | N7  | 112.1(3)  | C18 | C13 | N12 | 119.9(4) |
| C11 | N12 | C13 | 118.7(3)  | C14 | C13 | N12 | 120.6(4) |
| C2  | C1  | N7  | 122.9(3)  | C14 | C13 | C18 | 119.5(4) |
| C2  | C1  | C6  | 119.2(3)  | C17 | C18 | C13 | 118.8(4) |
| C6  | C1  | N7  | 117.9(3)  | O21 | C20 | C9  | 118.9(4) |
| C3  | C4  | I23 | 119.6(3)  | O21 | C20 | C22 | 123.9(4) |
| C5  | C4  | I23 | 120.5(3)  | C9  | C20 | C22 | 117.1(3) |
| C5  | C4  | C3  | 119.9(3)  | F19 | C17 | C18 | 118.7(5) |
| C3  | C2  | C1  | 120.5(3)  | F19 | C17 | C16 | 117.6(4) |
| C2  | C3  | C4  | 120.1(3)  | C16 | C17 | C18 | 123.7(5) |
| C5  | C6  | C1  | 120.0(3)  | C17 | C16 | C15 | 116.8(4) |
| N7  | C11 | S10 | 107.8(3)  | C13 | C14 | C15 | 119.2(5) |
| N12 | C11 | S10 | 126.9(3)  | C16 | C15 | C14 | 122.1(4) |
| N12 | C11 | N7  | 125.2(3)  |     |     |     |          |

**Table 6 Torsion Angles for exp\_256\_auto.**

| A   | B   | C   | D   | Angle/°   | A   | B   | C   | D   | Angle/°   |
|-----|-----|-----|-----|-----------|-----|-----|-----|-----|-----------|
| I23 | C4  | C3  | C2  | 179.1(3)  | C2  | C1  | C6  | C5  | -1.1(6)   |
| I23 | C4  | C5  | C6  | 179.9(3)  | C3  | C4  | C5  | C6  | 0.5(6)    |
| S10 | C9  | C20 | O21 | 0.4(6)    | C6  | C1  | C2  | C3  | 0.2(6)    |
| S10 | C9  | C20 | C22 | -178.6(3) | C11 | S10 | C9  | N8  | -2.8(3)   |
| N7  | N8  | C9  | S10 | 1.0(4)    | C11 | S10 | C9  | C20 | 175.7(3)  |
| N7  | N8  | C9  | C20 | -177.4(3) | C11 | N7  | N8  | C9  | 2.1(5)    |
| N7  | C1  | C2  | C3  | -178.0(3) | C11 | N7  | C1  | C2  | -9.2(5)   |
| N7  | C1  | C6  | C5  | 177.1(3)  | C11 | N7  | C1  | C6  | 172.6(4)  |
| N8  | N7  | C1  | C2  | 171.7(3)  | C11 | N12 | C13 | C18 | -91.6(5)  |
| N8  | N7  | C1  | C6  | -6.5(5)   | C11 | N12 | C13 | C14 | 91.9(5)   |
| N8  | N7  | C11 | S10 | -4.0(4)   | C5  | C4  | C3  | C2  | -1.5(6)   |
| N8  | N7  | C11 | N12 | 175.1(4)  | C9  | S10 | C11 | N7  | 3.6(3)    |
| N8  | C9  | C20 | O21 | 178.7(4)  | C9  | S10 | C11 | N12 | -175.5(4) |
| N8  | C9  | C20 | C22 | -0.3(6)   | C13 | N12 | C11 | S10 | 1.3(6)    |
| F19 | C17 | C16 | C15 | -177.5(4) | C13 | N12 | C11 | N7  | -177.6(3) |
| N12 | C13 | C18 | C17 | -175.9(4) | C13 | C18 | C17 | F19 | 177.0(4)  |
| N12 | C13 | C14 | C15 | 177.0(4)  | C13 | C18 | C17 | C16 | -1.5(7)   |
| C1  | N7  | N8  | C9  | -178.7(3) | C13 | C14 | C15 | C16 | -1.0(8)   |
| C1  | N7  | C11 | S10 | 176.9(3)  | C18 | C13 | C14 | C15 | 0.5(7)    |

**Table 6 Torsion Angles for exp\_256\_auto.**

| A  | B  | C   | D   | Angle/° | A   | B   | C   | D   | Angle/° |
|----|----|-----|-----|---------|-----|-----|-----|-----|---------|
| C1 | N7 | C11 | N12 | -4.1(6) | C18 | C17 | C16 | C15 | 1.0(7)  |
| C1 | C2 | C3  | C4  | 1.1(6)  | C17 | C16 | C15 | C14 | 0.3(7)  |
| C1 | C6 | C5  | C4  | 0.8(6)  | C14 | C13 | C18 | C17 | 0.7(6)  |

**Table 7 Hydrogen Atom Coordinates ( $\text{\AA} \times 10^4$ ) and Isotropic Displacement Parameters ( $\text{\AA}^2 \times 10^3$ ) for exp\_256\_auto.**

| Atom | x        | y       | z       | U(eq) |
|------|----------|---------|---------|-------|
| H2   | 4869.27  | 1995.07 | 7296.98 | 60    |
| H3   | 3943.26  | 948.84  | 7477.82 | 61    |
| H6   | 2043.72  | 2957.77 | 8647.3  | 60    |
| H5   | 1098.6   | 1907.45 | 8746.78 | 62    |
| H18  | 6860.34  | 3172.37 | 4626.45 | 71    |
| H16  | 10308.08 | 3704.07 | 6778.91 | 81    |
| H22A | 2177.78  | 5301.56 | 9468.53 | 97    |
| H22B | 1837.07  | 4621.26 | 8364.3  | 97    |
| H22C | 1600.55  | 5340.2  | 7412.68 | 97    |
| H14  | 7990.42  | 3276.72 | 9956.74 | 79    |
| H15  | 9892.5   | 3610.26 | 9588.59 | 91    |

**Crystal data for (Z)-1-(4-phenyl-5-(p-tolylimino)-4,5-dihydro-1,3,4-thiadiazol-2-yl)ethan-1-one**

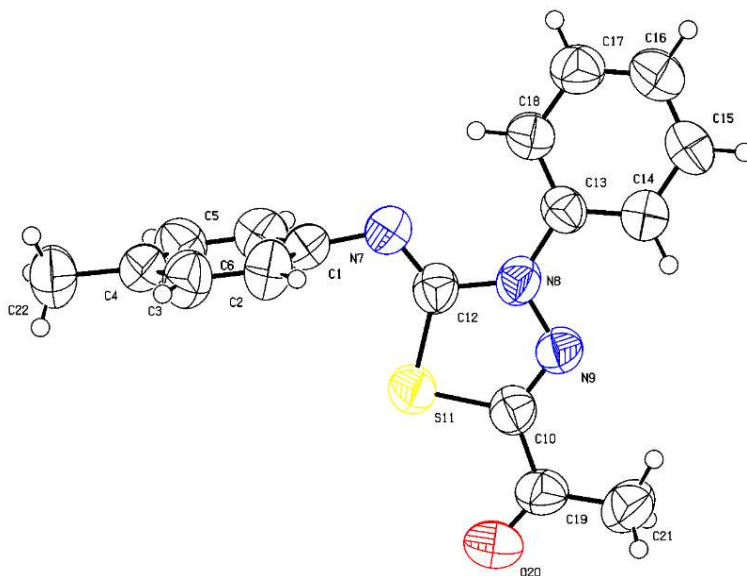

**Table 1 Crystal data and structure refinement for exp\_260\_auto “Deposition Number 2178551”.**

|                                    |                                                   |
|------------------------------------|---------------------------------------------------|
| Identification code                | exp_260_auto                                      |
| Empirical formula                  | C <sub>17</sub> H <sub>15</sub> N <sub>3</sub> OS |
| Formula weight                     | 309.38                                            |
| Temperature/K                      | 297.00(10)                                        |
| Crystal system                     | orthorhombic                                      |
| Space group                        | P2 <sub>1</sub> 2 <sub>1</sub> 2 <sub>1</sub>     |
| a/Å                                | 5.3058(4)                                         |
| b/Å                                | 8.6595(6)                                         |
| c/Å                                | 34.366(2)                                         |
| α/°                                | 90                                                |
| β/°                                | 90                                                |
| γ/°                                | 90                                                |
| Volume/Å <sup>3</sup>              | 1578.97(19)                                       |
| Z                                  | 4                                                 |
| ρ <sub>calc</sub> /cm <sup>3</sup> | 1.301                                             |
| μ/mm <sup>-1</sup>                 | 1.857                                             |
| F(000)                             | 648.0                                             |
| Crystal size/mm <sup>3</sup>       | 0.6 × 0.6 × 0.6                                   |
| Radiation                          | Cu Kα (λ = 1.54184)                               |

|                                                  |                                                                  |
|--------------------------------------------------|------------------------------------------------------------------|
| 2 $\Theta$ range for data collection/ $^{\circ}$ | 10.296 to 155.438                                                |
| Index ranges                                     | $-5 \leq h \leq 6$ , $-10 \leq k \leq 9$ , $-41 \leq l \leq 41$  |
| Reflections collected                            | 8336                                                             |
| Independent reflections                          | 2872 [ $R_{\text{int}} = 0.0581$ , $R_{\text{sigma}} = 0.0479$ ] |
| Data/restraints/parameters                       | 2872/0/201                                                       |
| Goodness-of-fit on $F^2$                         | 0.746                                                            |
| Final R indexes [ $I \geq 2\sigma(I)$ ]          | $R_1 = 0.0617$ , $wR_2 = 0.1639$                                 |
| Final R indexes [all data]                       | $R_1 = 0.0734$ , $wR_2 = 0.1877$                                 |
| Largest diff. peak/hole / $e \text{ \AA}^{-3}$   | 0.44/-0.21                                                       |
| Flack parameter                                  | 0.02(3)                                                          |

**Table 2 Fractional Atomic Coordinates ( $\times 10^4$ ) and Equivalent Isotropic Displacement Parameters ( $\text{\AA}^2 \times 10^3$ ) for exp\_260\_auto.  $U_{\text{eq}}$  is defined as 1/3 of the trace of the orthogonalised  $U_{\text{IJ}}$  tensor.**

| Atom | $x$       | $y$        | $z$        | $U(\text{eq})$ |
|------|-----------|------------|------------|----------------|
| S11  | -95(2)    | 6332.2(12) | 3448.6(3)  | 76.1(4)        |
| N9   | 1584(7)   | 3868(4)    | 3115.5(9)  | 68.3(9)        |
| N8   | 3005(7)   | 4046(4)    | 3443.3(9)  | 68.4(9)        |
| O20  | -3407(8)  | 6039(5)    | 2756.8(12) | 103.3(12)      |
| N7   | 3436(9)   | 5641(5)    | 3999.3(11) | 81.0(11)       |
| C13  | 4891(8)   | 2903(5)    | 3516.8(11) | 64.6(9)        |
| C1   | 2568(9)   | 6946(6)    | 4207.1(13) | 72.2(11)       |
| C12  | 2363(9)   | 5320(5)    | 3677.7(12) | 67.9(10)       |
| C18  | 6603(10)  | 3025(5)    | 3815.3(13) | 75.6(12)       |
| C10  | -67(10)   | 4944(5)    | 3081.9(11) | 69.6(10)       |
| C19  | -1907(10) | 4988(6)    | 2761.9(14) | 77.3(12)       |
| C4   | 1070(11)  | 9460(6)    | 4663.2(14) | 81.7(13)       |
| C6   | 3917(11)  | 8301(6)    | 4206.3(16) | 85.3(13)       |
| C17  | 8426(11)  | 1903(6)    | 3864.9(15) | 83.8(13)       |
| C14  | 5028(10)  | 1634(6)    | 3272.8(15) | 83.6(12)       |
| C2   | 430(11)   | 6876(7)    | 4437.0(16) | 88.3(14)       |
| C5   | 3167(12)  | 9540(6)    | 4430.7(17) | 88.9(14)       |
| C15  | 6855(12)  | 531(6)     | 3334.3(18) | 95.6(16)       |
| C3   | -257(12)  | 8124(7)    | 4661.0(15) | 89.8(14)       |
| C16  | 8543(12)  | 649(7)     | 3629.2(17) | 87.2(14)       |
| C21  | -1832(14) | 3752(7)    | 2464.5(15) | 97.0(17)       |
| C22  | 282(17)   | 10797(7)   | 4922.8(18) | 118(2)         |

**Table 3 Anisotropic Displacement Parameters ( $\text{\AA}^2 \times 10^3$ ) for exp\_260\_auto. The Anisotropic displacement factor exponent takes the form:  $-2\pi^2[h^2a^{*2}U_{11}+2hka^*b^*U_{12}+\dots]$ .**

| Atom | U <sub>11</sub> | U <sub>22</sub> | U <sub>33</sub> | U <sub>23</sub> | U <sub>13</sub> | U <sub>12</sub> |
|------|-----------------|-----------------|-----------------|-----------------|-----------------|-----------------|
| S11  | 95.7(8)         | 64.5(6)         | 68.2(6)         | 0.9(4)          | -6.4(6)         | 10.4(6)         |
| N9   | 81(2)           | 68.6(19)        | 55.4(17)        | 3.2(14)         | -3.0(17)        | 4.4(18)         |
| N8   | 83(2)           | 67.7(18)        | 54.2(16)        | -3.5(15)        | 0.1(16)         | 0.9(17)         |
| O20  | 111(3)          | 102(3)          | 97(2)           | 8(2)            | -26(2)          | 27(2)           |
| N7   | 89(2)           | 89(2)           | 66(2)           | -12.4(19)       | -10(2)          | 16(2)           |
| C13  | 69(2)           | 61.7(19)        | 63(2)           | 4.4(14)         | 6(2)            | 7(2)            |
| C1   | 81(3)           | 78(2)           | 58(2)           | -4.1(19)        | -9(2)           | 8(2)            |
| C12  | 81(3)           | 67(2)           | 56(2)           | 0.5(17)         | 7.3(19)         | 1(2)            |
| C18  | 87(3)           | 71(2)           | 69(2)           | 1.4(19)         | -7(2)           | 12(2)           |
| C10  | 82(3)           | 68(2)           | 58.4(19)        | 3.6(16)         | 5(2)            | 5(2)            |
| C19  | 86(3)           | 76(2)           | 69(2)           | 12(2)           | -11(2)          | 6(2)            |
| C4   | 98(3)           | 79(3)           | 68(2)           | -10(2)          | -16(3)          | 14(3)           |
| C6   | 85(3)           | 88(3)           | 83(3)           | 6(2)            | 7(3)            | 2(3)            |
| C17  | 90(3)           | 83(3)           | 79(3)           | 9(2)            | -9(3)           | 4(3)            |
| C14  | 87(3)           | 82(3)           | 82(3)           | -14(2)          | -9(3)           | 9(3)            |
| C2   | 95(3)           | 86(3)           | 84(3)           | -18(2)          | 10(3)           | -9(3)           |
| C5   | 103(4)          | 69(3)           | 94(3)           | 2(2)            | -3(3)           | 1(3)            |
| C15  | 103(4)          | 73(3)           | 110(4)          | -12(3)          | -10(3)          | 25(3)           |
| C3   | 96(3)           | 97(3)           | 77(3)           | -13(2)          | 11(3)           | 2(3)            |
| C16  | 87(3)           | 75(3)           | 99(3)           | 10(3)           | -1(3)           | 9(3)            |
| C21  | 125(5)          | 96(3)           | 69(3)           | -4(3)           | -21(3)          | 3(3)            |
| C22  | 161(6)          | 92(3)           | 102(4)          | -27(3)          | -12(4)          | 32(4)           |

**Table 4 Bond Lengths for exp\_260\_auto.**

| Atom | Atom | Length/ $\text{\AA}$ | Atom | Atom | Length/ $\text{\AA}$ |
|------|------|----------------------|------|------|----------------------|
| S11  | C12  | 1.757(5)             | C1   | C2   | 1.384(7)             |
| S11  | C10  | 1.742(4)             | C18  | C17  | 1.382(7)             |
| N9   | N8   | 1.364(5)             | C10  | C19  | 1.471(7)             |
| N9   | C10  | 1.284(6)             | C19  | C21  | 1.481(7)             |
| N8   | C13  | 1.430(5)             | C4   | C5   | 1.372(9)             |
| N8   | C12  | 1.408(5)             | C4   | C3   | 1.354(8)             |
| O20  | C19  | 1.209(6)             | C4   | C22  | 1.520(7)             |
| N7   | C1   | 1.414(6)             | C6   | C5   | 1.380(8)             |
| N7   | C12  | 1.274(5)             | C17  | C16  | 1.356(8)             |
| C13  | C18  | 1.374(6)             | C14  | C15  | 1.377(7)             |
| C13  | C14  | 1.384(6)             | C2   | C3   | 1.376(7)             |
| C1   | C6   | 1.375(8)             | C15  | C16  | 1.356(8)             |

**Table 5 Bond Angles for exp\_260\_auto.**

| Atom | Atom | Atom | Angle/°  | Atom | Atom | Atom | Angle/°  |
|------|------|------|----------|------|------|------|----------|
| C10  | S11  | C12  | 88.5(2)  | N9   | C10  | C19  | 122.6(4) |
| C10  | N9   | N8   | 111.7(3) | C19  | C10  | S11  | 121.2(4) |
| N9   | N8   | C13  | 117.0(3) | O20  | C19  | C10  | 117.9(4) |
| N9   | N8   | C12  | 115.3(3) | O20  | C19  | C21  | 123.5(5) |
| C12  | N8   | C13  | 127.7(4) | C10  | C19  | C21  | 118.7(4) |
| C12  | N7   | C1   | 117.9(4) | C5   | C4   | C22  | 121.8(6) |
| C18  | C13  | N8   | 122.7(4) | C3   | C4   | C5   | 117.5(5) |
| C18  | C13  | C14  | 118.6(4) | C3   | C4   | C22  | 120.7(6) |
| C14  | C13  | N8   | 118.7(4) | C1   | C6   | C5   | 120.8(5) |
| C6   | C1   | N7   | 120.8(5) | C16  | C17  | C18  | 121.4(5) |
| C6   | C1   | C2   | 117.7(5) | C15  | C14  | C13  | 119.7(5) |
| C2   | C1   | N7   | 121.3(5) | C3   | C2   | C1   | 120.1(5) |
| N8   | C12  | S11  | 108.3(3) | C4   | C5   | C6   | 121.3(5) |
| N7   | C12  | S11  | 127.7(3) | C16  | C15  | C14  | 121.8(5) |
| N7   | C12  | N8   | 124.0(4) | C4   | C3   | C2   | 122.4(5) |
| C13  | C18  | C17  | 120.0(4) | C15  | C16  | C17  | 118.4(5) |
| N9   | C10  | S11  | 116.2(3) |      |      |      |          |

**Table 6 Torsion Angles for exp\_260\_auto.**

| A   | B   | C   | D   | Angle/°   | A   | B   | C   | D   | Angle/°   |
|-----|-----|-----|-----|-----------|-----|-----|-----|-----|-----------|
| S11 | C10 | C19 | O20 | 1.6(7)    | C1  | C2  | C3  | C4  | 1.0(9)    |
| S11 | C10 | C19 | C21 | -178.4(4) | C12 | S11 | C10 | N9  | -1.2(4)   |
| N9  | N8  | C13 | C18 | 173.6(4)  | C12 | S11 | C10 | C19 | 176.6(4)  |
| N9  | N8  | C13 | C14 | -5.1(6)   | C12 | N8  | C13 | C18 | -8.9(7)   |
| N9  | N8  | C12 | S11 | -2.1(4)   | C12 | N8  | C13 | C14 | 172.3(4)  |
| N9  | N8  | C12 | N7  | 178.0(4)  | C12 | N7  | C1  | C6  | -103.6(6) |
| N9  | C10 | C19 | O20 | 179.2(4)  | C12 | N7  | C1  | C2  | 80.6(6)   |
| N9  | C10 | C19 | C21 | -0.7(7)   | C18 | C13 | C14 | C15 | 0.2(8)    |
| N8  | N9  | C10 | S11 | 0.2(5)    | C18 | C17 | C16 | C15 | 1.5(9)    |
| N8  | N9  | C10 | C19 | -177.5(4) | C10 | S11 | C12 | N8  | 1.8(3)    |
| N8  | C13 | C18 | C17 | -178.2(4) | C10 | S11 | C12 | N7  | -178.3(5) |
| N8  | C13 | C14 | C15 | 179.0(5)  | C10 | N9  | N8  | C13 | 179.0(4)  |
| N7  | C1  | C6  | C5  | -175.4(5) | C10 | N9  | N8  | C12 | 1.3(5)    |
| N7  | C1  | C2  | C3  | 174.7(5)  | C6  | C1  | C2  | C3  | -1.3(8)   |
| C13 | N8  | C12 | S11 | -179.6(3) | C14 | C13 | C18 | C17 | 0.6(7)    |
| C13 | N8  | C12 | N7  | 0.5(7)    | C14 | C15 | C16 | C17 | -0.8(9)   |

**Table 6 Torsion Angles for exp\_260\_auto.**

| A   | B   | C   | D   | Angle/°   | A   | B  | C  | D  | Angle/°   |
|-----|-----|-----|-----|-----------|-----|----|----|----|-----------|
| C13 | C18 | C17 | C16 | -1.4(8)   | C2  | C1 | C6 | C5 | 0.6(8)    |
| C13 | C14 | C15 | C16 | 0.0(9)    | C5  | C4 | C3 | C2 | 0.0(9)    |
| C1  | N7  | C12 | S11 | 1.0(7)    | C3  | C4 | C5 | C6 | -0.7(8)   |
| C1  | N7  | C12 | N8  | -179.1(4) | C22 | C4 | C5 | C6 | 177.7(6)  |
| C1  | C6  | C5  | C4  | 0.4(9)    | C22 | C4 | C3 | C2 | -178.5(6) |

**Table 7 Hydrogen Atom Coordinates ( $\text{\AA} \times 10^4$ ) and Isotropic Displacement Parameters ( $\text{\AA}^2 \times 10^3$ ) for exp\_260\_auto.**

| Atom | x        | y        | z       | U(eq) |
|------|----------|----------|---------|-------|
| H18  | 6534.56  | 3864.28  | 3983.96 | 91    |
| H6   | 5353.32  | 8383.85  | 4052.52 | 102   |
| H17  | 9598.1   | 2009.46  | 4064.28 | 101   |
| H14  | 3892.72  | 1526.95  | 3068.37 | 100   |
| H2   | -545.1   | 5983.52  | 4440.09 | 106   |
| H5   | 4103.14  | 10448.06 | 4424.15 | 107   |
| H15  | 6933.09  | -318.7   | 3169.06 | 115   |
| H3   | -1684.93 | 8047.39  | 4816.66 | 108   |
| H16  | 9752.77  | -112.69  | 3668.77 | 105   |
| H21A | -3520.89 | 3442.44  | 2401.25 | 145   |
| H21B | -918.68  | 2881.69  | 2564.7  | 145   |
| H21C | -1009.75 | 4130.19  | 2234.67 | 145   |
| H22A | 1302.18  | 11683.86 | 4865.32 | 177   |
| H22B | 503.94   | 10512.57 | 5190.58 | 177   |
| H22C | -1457.92 | 11039.3  | 4876.37 | 177   |



## Computational Details

We started our calculations with an exploratory conformational analysis of the reactants using the Grimme's XTB [1] and CREST [2,3] approaches using ethanol as implicit solvent [4]. The best structures from this conformational search were used as an initial geometry input for the more accurate DFT calculations. These DFT calculations were performed using the program ORCA (version 5.0.3) [5]. All geometry relaxations used the well-known hybrid exchange-correlation functional B3LYP, [6,7,8,9] supplemented with latest van der Waals (vdW) corrections due to Grimme et al. known as D4. [10,11] We used the triple-zeta polarized basis set (def2-TZVP) from Ahlrichs and coworkers. [12,13] The optimizations were speed up by using the RIJCOSX approximation. We used "TightSCF" keyword for all geometry relaxations for accurate evaluation of the ionic forces. Thus, the adopted computational protocol for the optimizations was B3LYP-D4/def2-TZVP. After geometry optimizations, we carried out a Hessian calculation and no imaginary frequencies were found in the vibrational analysis. This confirms that all the relaxed geometries presented here are true stationary points on the electronic ground state potential energy surface. Implicit solvent (ethanol) was considered at the SMD level to mimic the experimental conditions. An explicit ethanol molecule was used to further investigate the role of solvent. The typical ORCA keywords used in our input files were

```
!B3LYP D4 def2-TZVP def2/J RIJCOSX TightSCF Opt KeepDens NumFreq
%cpm
smd true
smdsolvent "ethanol"
end
```

Wavefunction analysis and post-processing of the *ab initio* calculations were carried out with the Multiwfn (version 3.3.8) software [14]. Calculation of the average local ionization energies followed Ref. [15] while the local electron affinity followed Ref. [16]. Natural Population Analysis (NPA atomic charges) were calculated with the JANPA software [17,18]. The ADCH [19] atomic charges were calculated with Multiwfn. Visualization and rendering were done with Chemcraft [20] and Multiwfn codes.

## REFERENCES:

- [1] C. Bannwarth, E. Caldeweyher, S. Ehlert, A. Hansen, P. Pracht, J. Seibert, S. Spicher, S. Grimme *WIREs Comput. Mol. Sci.*, **2020**, 11, e01493. DOI: [10.1002/wcms.1493](https://doi.org/10.1002/wcms.1493)
- [2] S. Grimme, *J. Chem. Theory Comput.*, **2019**, 155, 2847-2862. DOI: [10.1021/acs.jctc.9b00143](https://doi.org/10.1021/acs.jctc.9b00143)

- [3] P. Pracht, F. Bohle, S. Grimme, *Phys. Chem. Chem. Phys.*, **2020**, 22, 7169-7192. DOI: [10.1039/C9CP06869D](https://doi.org/10.1039/C9CP06869D)
- [4] S. Ehlert, M. Stahn, S. Spicher, S. Grimme, *J. Chem. Theory Comput.*, **2021**, 17, 4250-4261 DOI: [10.1021/acs.jctc.1c00471](https://doi.org/10.1021/acs.jctc.1c00471)
- [5] Neese, F. The ORCA Program System. *WIREs Comput Mol Sci* **2012**, 2 (1), 73–78. <https://doi.org/10.1002/wcms.81>.
- [6] A.D. Becke, *J.Chem.Phys.* 98 (1993) 5648-5652
- [7] C. Lee, W. Yang, R.G. Parr, *Phys. Rev. B* 37 (1988) 785-789
- [8] S.H. Vosko, L. Wilk, M. Nusair, *Can. J. Phys.* 58 (1980) 1200-1211
- [9] P.J. Stephens, F.J. Devlin, C.F. Chabalowski, M.J. Frisch, *J.Phys.Chem.* 98 (1994) 11623-11627
- [10] E. Caldeweyher, C. Bannwarth and S. Grimme, *J. Chem. Phys.*, **2017**, 147, 034112. DOI: [10.1063/1.4993215](https://doi.org/10.1063/1.4993215)
- [11] C. Bannwarth, S. Ehlert and S. Grimme., *J. Chem. Theory Comput.*, **2019**, 15, 1652-1671. DOI: [10.1021/acs.jctc.8b01176](https://doi.org/10.1021/acs.jctc.8b01176)
- [12] Weigend, F.; Ahlrichs, R. Balanced Basis Sets of Split Valence, Triple Zeta Valence and Quadruple Zeta Valence Quality for H to Rn: Design and Assessment of Accuracy. *Phys. Chem. Chem. Phys.* **2005**, 7 (18), 3297. <https://doi.org/10.1039/b508541a>.
- [13] Weigend, F. Accurate Coulomb-Fitting Basis Sets for H to Rn. *Phys. Chem. Chem. Phys.* **2006**, 8 (9), 1057. <https://doi.org/10.1039/b515623h>.
- [14] Lu, T.; Chen, F. Multiwfn: A multifunctional wavefunction analyzer. *Journal of Computational Chemistry* 2012, 33, 580–592.
- [15] Average local ionization energies on the molecular surfaces of aromatic systems as guides to chemical reactivity. Authors: Per Sjöberg, Jane S. Murray, Tore Brinck, and Peter Politzer. *Canadian Journal of Chemistry*, 68, 1440 (1990), <https://doi.org/10.1139/v90-220>
- [16] J. Molecular Modelling, 9, 342-347 (2003). Local molecular properties and their use in predicting reactivity. Bernd Ehresmann 1, Bodo Martin, Anselm H C Horn, Timothy Clark. DOI: 10.1007/s00894-003-0153-x
- [17] T. Yu. Nikolaienko, L. A. Bulavin, *Localized orbitals for optimal decomposition of molecular properties*, *International Journal of Quantum Chemistry* (2019), 119 : e25798, DOI: [10.1002/qua.25798](https://doi.org/10.1002/qua.25798)

- [18] T.Y.Nikolaienko, L.A.Bulavin, D.M.Hovorun, *JANPA: an open source cross-platform implementation of the Natural Population Analysis on the Java platform*, Computational and Theoretical Chemistry (2014), V.1050, P.15-22, DOI: [10.1016/j.comptc.2014.10.002](https://doi.org/10.1016/j.comptc.2014.10.002), <http://janpa.sourceforge.net>
- [19] Tian Lu and Feiwu Chen. Atomic dipole moment corrected Hirshfeld population method *J. Theor. Comput. Chem.*, 11, 163 (2012), <https://doi.org/10.1142/S0219633612500113>
- [20] Chemcraft - graphical software for visualization of quantum chemistry computations. <https://www.chemcraftprog.com>
